# Supplementary material for: Suction use in ureterorenoscopy: A systematic review and meta‐analysis of comparative studies
Source: PubMed Central journal article supplement (PMC11479806; doi:10.1002/bco2.408), 2024-07-08

# Suction in Ureteroscopy

R Geraghty

2024-01-18

## Contents

|          |                                                            |           |
|----------|------------------------------------------------------------|-----------|
| <b>1</b> | <b>Setup</b>                                               | <b>17</b> |
| 1.1      | Data Encoding . . . . .                                    | 19        |
| 1.2      | Make new columns combining CD . . . . .                    | 26        |
| <b>2</b> | <b>Data Exploration</b>                                    | <b>27</b> |
| <b>3</b> | <b>Demographic information</b>                             | <b>36</b> |
| 3.1      | Number of Patients . . . . .                               | 36        |
| 3.2      | Number of Surgeons . . . . .                               | 37        |
| 3.3      | Number of Male Patients . . . . .                          | 38        |
| 3.4      | Comparisons - type of intervention . . . . .               | 39        |
| 3.5      | Age . . . . .                                              | 40        |
| 3.6      | BMI . . . . .                                              | 41        |
| 3.7      | HU . . . . .                                               | 42        |
| 3.8      | Size Metrics . . . . .                                     | 43        |
| 3.8.1    | Size (mm) - missing data removed . . . . .                 | 43        |
| 3.8.2    | Area (mm <sup>2</sup> ) - missing data removed . . . . .   | 44        |
| 3.8.3    | Volume (mm <sup>3</sup> ) - missing data removed . . . . . | 45        |
| 3.9      | Stone Location . . . . .                                   | 46        |
| 3.9.1    | Distal Ureter . . . . .                                    | 46        |
| 3.9.2    | Mid Ureter . . . . .                                       | 47        |
| 3.9.3    | Upper Ureter . . . . .                                     | 48        |
| 3.9.4    | Renal Pelvis . . . . .                                     | 49        |
| 3.9.5    | Lower Calyx . . . . .                                      | 50        |
| 3.9.6    | middle Calyx . . . . .                                     | 51        |
| 3.9.7    | Upper Calyx . . . . .                                      | 52        |
| <b>4</b> | <b>Overall Meta-Analysis Outcomes</b>                      | <b>53</b> |
| 4.1      | Immediate SFR . . . . .                                    | 53        |
| 4.1.1    | Meta-analysis . . . . .                                    | 53        |
| 4.1.2    | Forest plot . . . . .                                      | 54        |
| 4.1.3    | Trim and Fill . . . . .                                    | 55        |
| 4.1.4    | Funnel plot . . . . .                                      | 56        |
| 4.1.5    | Baujat . . . . .                                           | 57        |
| 4.1.6    | Leave one out . . . . .                                    | 58        |
| 4.2      | Final SFR . . . . .                                        | 59        |
| 4.2.1    | Meta-analysis . . . . .                                    | 59        |
| 4.2.2    | Forest plot . . . . .                                      | 60        |
| 4.2.3    | Trim and Fill . . . . .                                    | 61        |
| 4.2.4    | Funnel plot . . . . .                                      | 63        |
| 4.2.5    | Baujat . . . . .                                           | 64        |

|        |                                |     |
|--------|--------------------------------|-----|
| 4.2.6  | Leave one out . . . . .        | 65  |
| 4.3    | OR time . . . . .              | 66  |
| 4.3.1  | Meta-analysis . . . . .        | 66  |
| 4.3.2  | Forest plot . . . . .          | 67  |
| 4.3.3  | Trim and Fill . . . . .        | 68  |
| 4.3.4  | Funnel plot . . . . .          | 69  |
| 4.3.5  | Baujat . . . . .               | 70  |
| 4.3.6  | Leave one out . . . . .        | 71  |
| 4.4    | Auxiliary Treatments . . . . . | 72  |
| 4.4.1  | Meta-analysis . . . . .        | 72  |
| 4.4.2  | Forest plot . . . . .          | 73  |
| 4.4.3  | Trim and Fill . . . . .        | 74  |
| 4.4.4  | Funnel plot . . . . .          | 75  |
| 4.4.5  | Baujat . . . . .               | 76  |
| 4.4.6  | Leave one out . . . . .        | 77  |
| 4.5    | VAS . . . . .                  | 78  |
| 4.5.1  | Meta-analysis . . . . .        | 78  |
| 4.5.2  | Forest plot . . . . .          | 79  |
| 4.5.3  | Trim and Fill . . . . .        | 80  |
| 4.5.4  | Funnel plot . . . . .          | 81  |
| 4.5.5  | Baujat . . . . .               | 82  |
| 4.5.6  | Leave one out . . . . .        | 83  |
| 4.6    | LoS . . . . .                  | 84  |
| 4.6.1  | Meta-analysis . . . . .        | 84  |
| 4.6.2  | Forest plot . . . . .          | 85  |
| 4.6.3  | Trim and Fill . . . . .        | 86  |
| 4.6.4  | Funnel plot . . . . .          | 87  |
| 4.6.5  | Baujat . . . . .               | 88  |
| 4.6.6  | Leave one out . . . . .        | 89  |
| 4.7    | Complications - All . . . . .  | 90  |
| 4.7.1  | Meta-analysis . . . . .        | 90  |
| 4.7.2  | Forest plot . . . . .          | 91  |
| 4.7.3  | Trim and Fill . . . . .        | 92  |
| 4.7.4  | Funnel plot . . . . .          | 93  |
| 4.7.5  | Baujat . . . . .               | 94  |
| 4.7.6  | Leave one out . . . . .        | 95  |
| 4.8    | Fever . . . . .                | 96  |
| 4.8.1  | Meta-analysis . . . . .        | 96  |
| 4.8.2  | Forest plot . . . . .          | 97  |
| 4.8.3  | Trim and Fill . . . . .        | 98  |
| 4.8.4  | Funnel plot . . . . .          | 99  |
| 4.8.5  | Baujat . . . . .               | 100 |
| 4.8.6  | Leave one out . . . . .        | 101 |
| 4.9    | Infections . . . . .           | 102 |
| 4.9.1  | Meta-analysis . . . . .        | 102 |
| 4.9.2  | Forest plot . . . . .          | 103 |
| 4.9.3  | Trim and Fill . . . . .        | 104 |
| 4.9.4  | Funnel plot . . . . .          | 105 |
| 4.9.5  | Baujat . . . . .               | 106 |
| 4.9.6  | Leave one out . . . . .        | 107 |
| 4.10   | Sepsis . . . . .               | 108 |
| 4.10.1 | Meta-analysis . . . . .        | 108 |
| 4.10.2 | Forest plot . . . . .          | 109 |
| 4.10.3 | Trim and Fill . . . . .        | 110 |

|        |                                 |     |
|--------|---------------------------------|-----|
| 4.10.4 | Funnel plot . . . . .           | 111 |
| 4.10.5 | Baujat . . . . .                | 112 |
| 4.10.6 | Leave one out . . . . .         | 113 |
| 4.11   | Abscess . . . . .               | 114 |
| 4.11.1 | Meta-analysis . . . . .         | 114 |
| 4.11.2 | Forest plot . . . . .           | 115 |
| 4.11.3 | Trim and Fill . . . . .         | 116 |
| 4.11.4 | Funnel plot . . . . .           | 117 |
| 4.11.5 | Baujat . . . . .                | 118 |
| 4.11.6 | Leave one out . . . . .         | 119 |
| 4.12   | Haematoma . . . . .             | 120 |
| 4.12.1 | Meta-analysis . . . . .         | 120 |
| 4.12.2 | Forest plot . . . . .           | 121 |
| 4.12.3 | Trim and Fill . . . . .         | 122 |
| 4.12.4 | Funnel plot . . . . .           | 123 |
| 4.12.5 | Baujat . . . . .                | 124 |
| 4.12.6 | Leave one out . . . . .         | 125 |
| 4.13   | Pain . . . . .                  | 126 |
| 4.13.1 | Meta-analysis . . . . .         | 126 |
| 4.13.2 | Forest plot . . . . .           | 127 |
| 4.13.3 | Trim and Fill . . . . .         | 128 |
| 4.13.4 | Funnel plot . . . . .           | 129 |
| 4.13.5 | Baujat . . . . .                | 130 |
| 4.13.6 | Leave one out . . . . .         | 131 |
| 4.14   | Stricture . . . . .             | 132 |
| 4.14.1 | Meta-analysis . . . . .         | 132 |
| 4.14.2 | Forest plot . . . . .           | 133 |
| 4.14.3 | Trim and Fill . . . . .         | 134 |
| 4.14.4 | Funnel plot . . . . .           | 135 |
| 4.14.5 | Baujat . . . . .                | 136 |
| 4.14.6 | Leave one out . . . . .         | 137 |
| 4.15   | Embolisation required . . . . . | 138 |
| 4.15.1 | Meta-analysis . . . . .         | 138 |
| 4.15.2 | Forest plot . . . . .           | 139 |
| 4.15.3 | Trim and Fill . . . . .         | 140 |
| 4.15.4 | Funnel plot . . . . .           | 141 |
| 4.15.5 | Baujat . . . . .                | 142 |
| 4.15.6 | Leave one out . . . . .         | 143 |
| 4.16   | Transfusion . . . . .           | 144 |
| 4.16.1 | Meta-analysis . . . . .         | 144 |
| 4.16.2 | Forest plot . . . . .           | 145 |
| 4.16.3 | Trim and Fill . . . . .         | 146 |
| 4.16.4 | Funnel plot . . . . .           | 147 |
| 4.16.5 | Baujat . . . . .                | 148 |
| 4.16.6 | Leave one out . . . . .         | 149 |
| 4.17   | Clavien I . . . . .             | 150 |
| 4.17.1 | Meta-analysis . . . . .         | 150 |
| 4.17.2 | Forest plot . . . . .           | 151 |
| 4.17.3 | Trim and Fill . . . . .         | 152 |
| 4.17.4 | Funnel plot . . . . .           | 153 |
| 4.17.5 | Baujat . . . . .                | 154 |
| 4.17.6 | Leave one out . . . . .         | 155 |
| 4.18   | Clavien II . . . . .            | 156 |
| 4.18.1 | Meta-analysis . . . . .         | 156 |

|          |                                                                               |            |
|----------|-------------------------------------------------------------------------------|------------|
| 4.18.2   | Forest plot                                                                   | 157        |
| 4.18.3   | Trim and Fill                                                                 | 158        |
| 4.18.4   | Funnel plot                                                                   | 159        |
| 4.18.5   | Baujat                                                                        | 160        |
| 4.18.6   | Leave one out                                                                 | 161        |
| 4.19     | Clavien III                                                                   | 162        |
| 4.19.1   | Meta-analysis                                                                 | 162        |
| 4.19.2   | Forest plot                                                                   | 163        |
| 4.19.3   | Trim and Fill                                                                 | 164        |
| 4.19.4   | Funnel plot                                                                   | 165        |
| 4.19.5   | Baujat                                                                        | 166        |
| 4.19.6   | Leave one out                                                                 | 167        |
| 4.20     | Clavien IV                                                                    | 168        |
| 4.20.1   | Meta-analysis                                                                 | 168        |
| 4.20.2   | Forest plot                                                                   | 169        |
| 4.20.3   | Trim and Fill                                                                 | 170        |
| 4.20.4   | Funnel plot                                                                   | 171        |
| 4.20.5   | Baujat                                                                        | 172        |
| 4.20.6   | Leave one out                                                                 | 173        |
| 4.21     | Clavien V                                                                     | 174        |
| 4.21.1   | Meta-analysis                                                                 | 174        |
| 4.21.2   | Forest plot                                                                   | 175        |
| 4.21.3   | Trim and Fill                                                                 | 176        |
| 4.21.4   | Funnel plot                                                                   | 177        |
| 4.21.5   | Baujat                                                                        | 178        |
| 4.21.6   | Leave one out                                                                 | 179        |
| 4.22     | Clavien I-II                                                                  | 180        |
| 4.22.1   | Meta-analysis                                                                 | 180        |
| 4.22.2   | Forest plot                                                                   | 181        |
| 4.22.3   | Trim and Fill                                                                 | 182        |
| 4.22.4   | Funnel plot                                                                   | 183        |
| 4.22.5   | Baujat                                                                        | 184        |
| 4.22.6   | Leave one out                                                                 | 185        |
| 4.23     | Clavien III-V                                                                 | 186        |
| 4.23.1   | Meta-analysis                                                                 | 186        |
| 4.23.2   | Forest plot                                                                   | 187        |
| 4.23.3   | Trim and Fill                                                                 | 188        |
| 4.23.4   | Funnel plot                                                                   | 189        |
| 4.23.5   | Baujat                                                                        | 190        |
| 4.23.6   | Leave one out                                                                 | 191        |
| <b>5</b> | <b>Overall Summary Forest plots</b>                                           | <b>192</b> |
| 5.1      | Summary Table of number of studies for each outcome included in meta-analysis | 196        |
| 5.2      | Summary Forest plot of Continuous outcomes                                    | 197        |
| 5.2.1    | Continuous Outcomes Table                                                     | 197        |
| 5.2.2    | Continuous Forest plot                                                        | 198        |
| 5.3      | Summary Forest plot of Binary outcomes                                        | 199        |
| 5.3.1    | Binary Outcomes Table                                                         | 200        |
| 5.3.2    | Binary Forest plot - Meta-Analysis                                            | 201        |
| <b>6</b> | <b>RCT only Meta-Analysis Outcomes</b>                                        | <b>202</b> |
| 6.1      | Immediate SFR                                                                 | 203        |
| 6.1.1    | Meta-analysis                                                                 | 203        |
| 6.1.2    | Forest plot                                                                   | 204        |

|       |                                |     |
|-------|--------------------------------|-----|
| 6.1.3 | Trim and Fill . . . . .        | 205 |
| 6.1.4 | Funnel plot . . . . .          | 206 |
| 6.1.5 | Baujat . . . . .               | 207 |
| 6.1.6 | Leave one out . . . . .        | 208 |
| 6.2   | Final SFR . . . . .            | 209 |
| 6.2.1 | Meta-analysis . . . . .        | 209 |
| 6.2.2 | Forest plot . . . . .          | 210 |
| 6.2.3 | Trim and Fill . . . . .        | 211 |
| 6.2.4 | Funnel plot . . . . .          | 212 |
| 6.2.5 | Baujat . . . . .               | 213 |
| 6.2.6 | Leave one out . . . . .        | 214 |
| 6.3   | OR time . . . . .              | 215 |
| 6.3.1 | Meta-analysis . . . . .        | 215 |
| 6.3.2 | Forest plot . . . . .          | 216 |
| 6.3.3 | Trim and Fill . . . . .        | 217 |
| 6.3.4 | Funnel plot . . . . .          | 218 |
| 6.3.5 | Baujat . . . . .               | 219 |
| 6.3.6 | Leave one out . . . . .        | 220 |
| 6.4   | Auxiliary Treatments . . . . . | 221 |
| 6.4.1 | Meta-analysis . . . . .        | 221 |
| 6.4.2 | Forest plot . . . . .          | 222 |
| 6.4.3 | Trim and Fill . . . . .        | 223 |
| 6.4.4 | Funnel plot . . . . .          | 224 |
| 6.4.5 | Baujat . . . . .               | 225 |
| 6.4.6 | Leave one out . . . . .        | 226 |
| 6.5   | VAS . . . . .                  | 227 |
| 6.5.1 | Meta-analysis . . . . .        | 227 |
| 6.5.2 | Forest plot . . . . .          | 228 |
| 6.5.3 | Trim and Fill . . . . .        | 229 |
| 6.5.4 | Funnel plot . . . . .          | 230 |
| 6.5.5 | Baujat . . . . .               | 231 |
| 6.5.6 | Leave one out . . . . .        | 232 |
| 6.6   | LoS . . . . .                  | 233 |
| 6.6.1 | Meta-analysis . . . . .        | 233 |
| 6.6.2 | Forest plot . . . . .          | 234 |
| 6.6.3 | Trim and Fill . . . . .        | 235 |
| 6.6.4 | Funnel plot . . . . .          | 236 |
| 6.6.5 | Baujat . . . . .               | 237 |
| 6.6.6 | Leave one out . . . . .        | 238 |
| 6.7   | Complications - All . . . . .  | 239 |
| 6.7.1 | Meta-analysis . . . . .        | 239 |
| 6.7.2 | Forest plot . . . . .          | 240 |
| 6.7.3 | Trim and Fill . . . . .        | 241 |
| 6.7.4 | Funnel plot . . . . .          | 242 |
| 6.7.5 | Baujat . . . . .               | 243 |
| 6.7.6 | Leave one out . . . . .        | 244 |
| 6.8   | Fever . . . . .                | 245 |
| 6.8.1 | Meta-analysis . . . . .        | 245 |
| 6.8.2 | Forest plot . . . . .          | 246 |
| 6.8.3 | Trim and Fill . . . . .        | 247 |
| 6.8.4 | Funnel plot . . . . .          | 248 |
| 6.8.5 | Baujat . . . . .               | 249 |
| 6.8.6 | Leave one out . . . . .        | 250 |
| 6.9   | Infections . . . . .           | 251 |

|        |                       |     |
|--------|-----------------------|-----|
| 6.9.1  | Meta-analysis         | 251 |
| 6.9.2  | Forest plot           | 252 |
| 6.9.3  | Trim and Fill         | 253 |
| 6.9.4  | Funnel plot           | 254 |
| 6.9.5  | Baujat                | 255 |
| 6.9.6  | Leave one out         | 256 |
| 6.10   | Sepsis                | 257 |
| 6.10.1 | Meta-analysis         | 257 |
| 6.10.2 | Forest plot           | 258 |
| 6.10.3 | Trim and Fill         | 259 |
| 6.10.4 | Funnel plot           | 260 |
| 6.10.5 | Baujat                | 261 |
| 6.10.6 | Leave one out         | 262 |
| 6.11   | Abscess               | 263 |
| 6.11.1 | Meta-analysis         | 263 |
| 6.11.2 | Forest plot           | 264 |
| 6.11.3 | Trim and Fill         | 265 |
| 6.11.4 | Funnel plot           | 266 |
| 6.11.5 | Baujat                | 267 |
| 6.11.6 | Leave one out         | 268 |
| 6.12   | Haematoma             | 269 |
| 6.12.1 | Meta-analysis         | 269 |
| 6.12.2 | Forest plot           | 270 |
| 6.12.3 | Trim and Fill         | 271 |
| 6.12.4 | Funnel plot           | 272 |
| 6.12.5 | Baujat                | 273 |
| 6.12.6 | Leave one out         | 274 |
| 6.13   | Pain                  | 275 |
| 6.13.1 | Meta-analysis         | 275 |
| 6.13.2 | Forest plot           | 276 |
| 6.13.3 | Trim and Fill         | 277 |
| 6.13.4 | Funnel plot           | 278 |
| 6.13.5 | Baujat                | 279 |
| 6.13.6 | Leave one out         | 280 |
| 6.14   | Stricture             | 281 |
| 6.14.1 | Meta-analysis         | 281 |
| 6.14.2 | Forest plot           | 282 |
| 6.14.3 | Trim and Fill         | 283 |
| 6.14.4 | Funnel plot           | 284 |
| 6.14.5 | Baujat                | 285 |
| 6.14.6 | Leave one out         | 286 |
| 6.15   | Embolisation required | 287 |
| 6.15.1 | Meta-analysis         | 287 |
| 6.15.2 | Forest plot           | 288 |
| 6.15.3 | Trim and Fill         | 289 |
| 6.15.4 | Funnel plot           | 290 |
| 6.15.5 | Baujat                | 291 |
| 6.15.6 | Leave one out         | 292 |
| 6.16   | Transfusion           | 293 |
| 6.16.1 | Meta-analysis         | 293 |
| 6.16.2 | Forest plot           | 294 |
| 6.16.3 | Trim and Fill         | 295 |
| 6.16.4 | Funnel plot           | 296 |
| 6.16.5 | Baujat                | 297 |

|          |                                                                                         |            |
|----------|-----------------------------------------------------------------------------------------|------------|
| 6.16.6   | Leave one out . . . . .                                                                 | 298        |
| 6.17     | Clavien I . . . . .                                                                     | 299        |
| 6.17.1   | Meta-analysis . . . . .                                                                 | 299        |
| 6.17.2   | Forest plot . . . . .                                                                   | 300        |
| 6.17.3   | Trim and Fill . . . . .                                                                 | 301        |
| 6.17.4   | Funnel plot . . . . .                                                                   | 302        |
| 6.17.5   | Baujat . . . . .                                                                        | 303        |
| 6.17.6   | Leave one out . . . . .                                                                 | 304        |
| 6.18     | Clavien II . . . . .                                                                    | 305        |
| 6.18.1   | Meta-analysis . . . . .                                                                 | 305        |
| 6.18.2   | Forest plot . . . . .                                                                   | 306        |
| 6.18.3   | Trim and Fill . . . . .                                                                 | 307        |
| 6.18.4   | Funnel plot . . . . .                                                                   | 308        |
| 6.18.5   | Baujat . . . . .                                                                        | 309        |
| 6.18.6   | Leave one out . . . . .                                                                 | 310        |
| 6.19     | Clavien III . . . . .                                                                   | 311        |
| 6.19.1   | Meta-analysis . . . . .                                                                 | 311        |
| 6.19.2   | Forest plot . . . . .                                                                   | 312        |
| 6.19.3   | Trim and Fill . . . . .                                                                 | 313        |
| 6.19.4   | Funnel plot . . . . .                                                                   | 314        |
| 6.19.5   | Baujat . . . . .                                                                        | 315        |
| 6.19.6   | Leave one out . . . . .                                                                 | 316        |
| 6.20     | Clavien IV . . . . .                                                                    | 317        |
| 6.20.1   | Meta-analysis . . . . .                                                                 | 317        |
| 6.20.2   | Forest plot . . . . .                                                                   | 318        |
| 6.20.3   | Trim and Fill . . . . .                                                                 | 319        |
| 6.20.4   | Funnel plot . . . . .                                                                   | 320        |
| 6.20.5   | Baujat . . . . .                                                                        | 321        |
| 6.20.6   | Leave one out . . . . .                                                                 | 322        |
| 6.21     | Clavien V . . . . .                                                                     | 323        |
| 6.21.1   | Meta-analysis . . . . .                                                                 | 323        |
| 6.21.2   | Forest plot . . . . .                                                                   | 324        |
| 6.21.3   | Trim and Fill . . . . .                                                                 | 325        |
| 6.21.4   | Funnel plot . . . . .                                                                   | 326        |
| 6.21.5   | Baujat . . . . .                                                                        | 327        |
| 6.21.6   | Leave one out . . . . .                                                                 | 328        |
| 6.22     | Clavien I-II . . . . .                                                                  | 329        |
| 6.22.1   | Meta-analysis . . . . .                                                                 | 329        |
| 6.22.2   | Forest plot . . . . .                                                                   | 330        |
| 6.22.3   | Trim and Fill . . . . .                                                                 | 331        |
| 6.22.4   | Funnel plot . . . . .                                                                   | 332        |
| 6.22.5   | Baujat . . . . .                                                                        | 333        |
| 6.22.6   | Leave one out . . . . .                                                                 | 334        |
| 6.23     | Clavien III-V . . . . .                                                                 | 335        |
| 6.23.1   | Meta-analysis . . . . .                                                                 | 335        |
| 6.23.2   | Forest plot . . . . .                                                                   | 336        |
| 6.23.3   | Trim and Fill . . . . .                                                                 | 337        |
| 6.23.4   | Funnel plot . . . . .                                                                   | 338        |
| 6.23.5   | Baujat . . . . .                                                                        | 339        |
| 6.23.6   | Leave one out . . . . .                                                                 | 340        |
| <b>7</b> | <b>RCT Only Summary Forest plots</b>                                                    | <b>341</b> |
| 7.1      | Summary Table of number of studies for each outcome included in meta-analysis . . . . . | 345        |
| 7.2      | Summary Forest plot of Continuous outcomes . . . . .                                    | 346        |

|          |                                                  |            |
|----------|--------------------------------------------------|------------|
| 7.2.1    | Continuous Outcomes Table . . . . .              | 346        |
| 7.2.2    | Continuous Forest plot . . . . .                 | 347        |
| 7.3      | Summary Forest plot of Binary outcomes . . . . . | 348        |
| 7.3.1    | Binary Outcomes Table . . . . .                  | 349        |
| 7.3.2    | Binary Forest plot - Meta-Analysis . . . . .     | 350        |
| <b>8</b> | <b>Semi-rigid Only Meta-Analysis Outcomes</b>    | <b>351</b> |
| 8.1      | Immediate SFR . . . . .                          | 352        |
| 8.1.1    | Meta-analysis . . . . .                          | 352        |
| 8.1.2    | Forest plot . . . . .                            | 353        |
| 8.1.3    | Trim and Fill . . . . .                          | 354        |
| 8.1.4    | Funnel plot . . . . .                            | 355        |
| 8.1.5    | Baujat . . . . .                                 | 356        |
| 8.1.6    | Leave one out . . . . .                          | 357        |
| 8.2      | Final SFR . . . . .                              | 358        |
| 8.2.1    | Meta-analysis . . . . .                          | 358        |
| 8.2.2    | Forest plot . . . . .                            | 359        |
| 8.2.3    | Trim and Fill . . . . .                          | 360        |
| 8.2.4    | Funnel plot . . . . .                            | 361        |
| 8.2.5    | Baujat . . . . .                                 | 362        |
| 8.2.6    | Leave one out . . . . .                          | 363        |
| 8.3      | OR time . . . . .                                | 364        |
| 8.3.1    | Meta-analysis . . . . .                          | 364        |
| 8.3.2    | Forest plot . . . . .                            | 365        |
| 8.3.3    | Trim and Fill . . . . .                          | 366        |
| 8.3.4    | Funnel plot . . . . .                            | 367        |
| 8.3.5    | Baujat . . . . .                                 | 368        |
| 8.3.6    | Leave one out . . . . .                          | 369        |
| 8.4      | Auxiliary Treatments . . . . .                   | 370        |
| 8.4.1    | Meta-analysis . . . . .                          | 370        |
| 8.4.2    | Forest plot . . . . .                            | 371        |
| 8.4.3    | Trim and Fill . . . . .                          | 372        |
| 8.4.4    | Funnel plot . . . . .                            | 373        |
| 8.4.5    | Baujat . . . . .                                 | 374        |
| 8.4.6    | Leave one out . . . . .                          | 375        |
| 8.5      | VAS . . . . .                                    | 376        |
| 8.5.1    | Meta-analysis . . . . .                          | 376        |
| 8.5.2    | Forest plot . . . . .                            | 377        |
| 8.5.3    | Trim and Fill . . . . .                          | 378        |
| 8.5.4    | Funnel plot . . . . .                            | 379        |
| 8.5.5    | Baujat . . . . .                                 | 380        |
| 8.5.6    | Leave one out . . . . .                          | 381        |
| 8.6      | LoS . . . . .                                    | 382        |
| 8.6.1    | Meta-analysis . . . . .                          | 382        |
| 8.6.2    | Forest plot . . . . .                            | 383        |
| 8.6.3    | Trim and Fill . . . . .                          | 384        |
| 8.6.4    | Funnel plot . . . . .                            | 385        |
| 8.6.5    | Baujat . . . . .                                 | 386        |
| 8.6.6    | Leave one out . . . . .                          | 387        |
| 8.7      | Complications - All . . . . .                    | 388        |
| 8.7.1    | Meta-analysis . . . . .                          | 388        |
| 8.7.2    | Forest plot . . . . .                            | 389        |
| 8.7.3    | Trim and Fill . . . . .                          | 390        |
| 8.7.4    | Funnel plot . . . . .                            | 391        |



|        |                                 |     |
|--------|---------------------------------|-----|
| 8.7.5  | Baujat . . . . .                | 392 |
| 8.7.6  | Leave one out . . . . .         | 393 |
| 8.8    | Fever . . . . .                 | 394 |
| 8.8.1  | Meta-analysis . . . . .         | 394 |
| 8.8.2  | Forest plot . . . . .           | 395 |
| 8.8.3  | Trim and Fill . . . . .         | 396 |
| 8.8.4  | Funnel plot . . . . .           | 397 |
| 8.8.5  | Baujat . . . . .                | 398 |
| 8.8.6  | Leave one out . . . . .         | 399 |
| 8.9    | Infections . . . . .            | 400 |
| 8.9.1  | Meta-analysis . . . . .         | 400 |
| 8.9.2  | Forest plot . . . . .           | 401 |
| 8.9.3  | Trim and Fill . . . . .         | 402 |
| 8.9.4  | Funnel plot . . . . .           | 403 |
| 8.9.5  | Baujat . . . . .                | 404 |
| 8.9.6  | Leave one out . . . . .         | 405 |
| 8.10   | Sepsis . . . . .                | 406 |
| 8.10.1 | Meta-analysis . . . . .         | 406 |
| 8.10.2 | Forest plot . . . . .           | 407 |
| 8.10.3 | Trim and Fill . . . . .         | 408 |
| 8.10.4 | Funnel plot . . . . .           | 409 |
| 8.10.5 | Baujat . . . . .                | 410 |
| 8.10.6 | Leave one out . . . . .         | 411 |
| 8.11   | Abscess . . . . .               | 412 |
| 8.11.1 | Meta-analysis . . . . .         | 412 |
| 8.11.2 | Forest plot . . . . .           | 413 |
| 8.11.3 | Trim and Fill . . . . .         | 414 |
| 8.11.4 | Funnel plot . . . . .           | 415 |
| 8.11.5 | Baujat . . . . .                | 416 |
| 8.11.6 | Leave one out . . . . .         | 417 |
| 8.12   | Haematoma . . . . .             | 418 |
| 8.12.1 | Meta-analysis . . . . .         | 418 |
| 8.12.2 | Forest plot . . . . .           | 419 |
| 8.12.3 | Trim and Fill . . . . .         | 420 |
| 8.12.4 | Funnel plot . . . . .           | 421 |
| 8.12.5 | Baujat . . . . .                | 422 |
| 8.12.6 | Leave one out . . . . .         | 423 |
| 8.13   | Pain . . . . .                  | 424 |
| 8.13.1 | Meta-analysis . . . . .         | 424 |
| 8.13.2 | Forest plot . . . . .           | 425 |
| 8.13.3 | Trim and Fill . . . . .         | 426 |
| 8.13.4 | Funnel plot . . . . .           | 427 |
| 8.13.5 | Baujat . . . . .                | 428 |
| 8.13.6 | Leave one out . . . . .         | 429 |
| 8.14   | Stricture . . . . .             | 430 |
| 8.14.1 | Meta-analysis . . . . .         | 430 |
| 8.14.2 | Forest plot . . . . .           | 431 |
| 8.14.3 | Trim and Fill . . . . .         | 432 |
| 8.14.4 | Funnel plot . . . . .           | 433 |
| 8.14.5 | Baujat . . . . .                | 434 |
| 8.14.6 | Leave one out . . . . .         | 435 |
| 8.15   | Embolisation required . . . . . | 436 |
| 8.15.1 | Meta-analysis . . . . .         | 436 |
| 8.15.2 | Forest plot . . . . .           | 437 |

|        |               |     |
|--------|---------------|-----|
| 8.15.3 | Trim and Fill | 438 |
| 8.15.4 | Funnel plot   | 439 |
| 8.15.5 | Baujat        | 440 |
| 8.15.6 | Leave one out | 441 |
| 8.16   | Transfusion   | 442 |
| 8.16.1 | Meta-analysis | 442 |
| 8.16.2 | Forest plot   | 443 |
| 8.16.3 | Trim and Fill | 444 |
| 8.16.4 | Funnel plot   | 445 |
| 8.16.5 | Baujat        | 446 |
| 8.16.6 | Leave one out | 447 |
| 8.17   | Clavien I     | 448 |
| 8.17.1 | Meta-analysis | 448 |
| 8.17.2 | Forest plot   | 449 |
| 8.17.3 | Trim and Fill | 450 |
| 8.17.4 | Funnel plot   | 451 |
| 8.17.5 | Baujat        | 452 |
| 8.17.6 | Leave one out | 453 |
| 8.18   | Clavien II    | 454 |
| 8.18.1 | Meta-analysis | 454 |
| 8.18.2 | Forest plot   | 455 |
| 8.18.3 | Trim and Fill | 456 |
| 8.18.4 | Funnel plot   | 457 |
| 8.18.5 | Baujat        | 458 |
| 8.18.6 | Leave one out | 459 |
| 8.19   | Clavien III   | 460 |
| 8.19.1 | Meta-analysis | 460 |
| 8.19.2 | Forest plot   | 461 |
| 8.19.3 | Trim and Fill | 462 |
| 8.19.4 | Funnel plot   | 463 |
| 8.19.5 | Baujat        | 464 |
| 8.19.6 | Leave one out | 465 |
| 8.20   | Clavien IV    | 466 |
| 8.20.1 | Meta-analysis | 466 |
| 8.20.2 | Forest plot   | 467 |
| 8.20.3 | Trim and Fill | 468 |
| 8.20.4 | Funnel plot   | 469 |
| 8.20.5 | Baujat        | 470 |
| 8.20.6 | Leave one out | 471 |
| 8.21   | Clavien V     | 472 |
| 8.21.1 | Meta-analysis | 472 |
| 8.21.2 | Forest plot   | 473 |
| 8.21.3 | Trim and Fill | 474 |
| 8.21.4 | Funnel plot   | 475 |
| 8.21.5 | Baujat        | 476 |
| 8.21.6 | Leave one out | 477 |
| 8.22   | Clavien I-II  | 478 |
| 8.22.1 | Meta-analysis | 478 |
| 8.22.2 | Forest plot   | 479 |
| 8.22.3 | Trim and Fill | 480 |
| 8.22.4 | Funnel plot   | 481 |
| 8.22.5 | Baujat        | 482 |
| 8.22.6 | Leave one out | 483 |
| 8.23   | Clavien III-V | 484 |

|           |                                                                                         |            |
|-----------|-----------------------------------------------------------------------------------------|------------|
| 8.23.1    | Meta-analysis . . . . .                                                                 | 484        |
| 8.23.2    | Forest plot . . . . .                                                                   | 485        |
| 8.23.3    | Trim and Fill . . . . .                                                                 | 486        |
| 8.23.4    | Funnel plot . . . . .                                                                   | 487        |
| 8.23.5    | Baujat . . . . .                                                                        | 488        |
| 8.23.6    | Leave one out . . . . .                                                                 | 489        |
| <b>9</b>  | <b>Semi-Rigid URS Only Summary Forest plots</b>                                         | <b>490</b> |
| 9.1       | Summary Table of number of studies for each outcome included in meta-analysis . . . . . | 494        |
| 9.2       | Summary Forest plot of Continuous outcomes . . . . .                                    | 495        |
| 9.2.1     | Continuous Outcomes Table . . . . .                                                     | 495        |
| 9.2.2     | Continuous Forest plot . . . . .                                                        | 496        |
| 9.3       | Summary Forest plot of Binary outcomes . . . . .                                        | 497        |
| 9.3.1     | Binary Outcomes Table . . . . .                                                         | 498        |
| 9.3.2     | Binary Forest plot - Meta-Analysis . . . . .                                            | 499        |
| <b>10</b> | <b>Flexi URS Only Meta-Analysis Outcomes</b>                                            | <b>500</b> |
| 10.1      | Immediate SFR . . . . .                                                                 | 501        |
| 10.1.1    | Meta-analysis . . . . .                                                                 | 501        |
| 10.1.2    | Forest plot . . . . .                                                                   | 502        |
| 10.1.3    | Trim and Fill . . . . .                                                                 | 503        |
| 10.1.4    | Funnel plot . . . . .                                                                   | 504        |
| 10.1.5    | Baujat . . . . .                                                                        | 505        |
| 10.1.6    | Leave one out . . . . .                                                                 | 506        |
| 10.2      | Final SFR . . . . .                                                                     | 507        |
| 10.2.1    | Meta-analysis . . . . .                                                                 | 507        |
| 10.2.2    | Forest plot . . . . .                                                                   | 508        |
| 10.2.3    | Trim and Fill . . . . .                                                                 | 509        |
| 10.2.4    | Funnel plot . . . . .                                                                   | 510        |
| 10.2.5    | Baujat . . . . .                                                                        | 511        |
| 10.2.6    | Leave one out . . . . .                                                                 | 512        |
| 10.3      | OR time . . . . .                                                                       | 513        |
| 10.3.1    | Meta-analysis . . . . .                                                                 | 513        |
| 10.3.2    | Forest plot . . . . .                                                                   | 514        |
| 10.3.3    | Trim and Fill . . . . .                                                                 | 515        |
| 10.3.4    | Funnel plot . . . . .                                                                   | 516        |
| 10.3.5    | Baujat . . . . .                                                                        | 517        |
| 10.3.6    | Leave one out . . . . .                                                                 | 518        |
| 10.4      | Auxiliary Treatments . . . . .                                                          | 519        |
| 10.4.1    | Meta-analysis . . . . .                                                                 | 519        |
| 10.4.2    | Forest plot . . . . .                                                                   | 520        |
| 10.4.3    | Trim and Fill . . . . .                                                                 | 521        |
| 10.4.4    | Funnel plot . . . . .                                                                   | 522        |
| 10.4.5    | Baujat . . . . .                                                                        | 523        |
| 10.4.6    | Leave one out . . . . .                                                                 | 524        |
| 10.5      | VAS . . . . .                                                                           | 525        |
| 10.5.1    | Meta-analysis . . . . .                                                                 | 525        |
| 10.5.2    | Forest plot . . . . .                                                                   | 526        |
| 10.5.3    | Trim and Fill . . . . .                                                                 | 527        |
| 10.5.4    | Funnel plot . . . . .                                                                   | 528        |
| 10.5.5    | Baujat . . . . .                                                                        | 529        |
| 10.5.6    | Leave one out . . . . .                                                                 | 530        |
| 10.6      | LoS . . . . .                                                                           | 531        |
| 10.6.1    | Meta-analysis . . . . .                                                                 | 531        |

|         |                     |     |
|---------|---------------------|-----|
| 10.6.2  | Forest plot         | 532 |
| 10.6.3  | Trim and Fill       | 533 |
| 10.6.4  | Funnel plot         | 534 |
| 10.6.5  | Baujat              | 535 |
| 10.6.6  | Leave one out       | 536 |
| 10.7    | Complications - All | 537 |
| 10.7.1  | Meta-analysis       | 537 |
| 10.7.2  | Forest plot         | 538 |
| 10.7.3  | Trim and Fill       | 539 |
| 10.7.4  | Funnel plot         | 540 |
| 10.7.5  | Baujat              | 541 |
| 10.7.6  | Leave one out       | 542 |
| 10.8    | Fever               | 543 |
| 10.8.1  | Meta-analysis       | 543 |
| 10.8.2  | Forest plot         | 544 |
| 10.8.3  | Trim and Fill       | 545 |
| 10.8.4  | Funnel plot         | 546 |
| 10.8.5  | Baujat              | 547 |
| 10.8.6  | Leave one out       | 548 |
| 10.9    | Infections          | 549 |
| 10.9.1  | Meta-analysis       | 549 |
| 10.9.2  | Forest plot         | 550 |
| 10.9.3  | Trim and Fill       | 551 |
| 10.9.4  | Funnel plot         | 552 |
| 10.9.5  | Baujat              | 553 |
| 10.9.6  | Leave one out       | 554 |
| 10.10   | Sepsis              | 555 |
| 10.10.1 | Meta-analysis       | 555 |
| 10.10.2 | Forest plot         | 556 |
| 10.10.3 | Trim and Fill       | 557 |
| 10.10.4 | Funnel plot         | 558 |
| 10.10.5 | Baujat              | 559 |
| 10.10.6 | Leave one out       | 560 |
| 10.11   | Abscess             | 561 |
| 10.11.1 | Meta-analysis       | 561 |
| 10.11.2 | Forest plot         | 562 |
| 10.11.3 | Trim and Fill       | 563 |
| 10.11.4 | Funnel plot         | 564 |
| 10.11.5 | Baujat              | 565 |
| 10.11.6 | Leave one out       | 566 |
| 10.12   | Haematoma           | 567 |
| 10.12.1 | Meta-analysis       | 567 |
| 10.12.2 | Forest plot         | 568 |
| 10.12.3 | Trim and Fill       | 569 |
| 10.12.4 | Funnel plot         | 570 |
| 10.12.5 | Baujat              | 571 |
| 10.12.6 | Leave one out       | 572 |
| 10.13   | Pain                | 573 |
| 10.13.1 | Meta-analysis       | 573 |
| 10.13.2 | Forest plot         | 574 |
| 10.13.3 | Trim and Fill       | 575 |
| 10.13.4 | Funnel plot         | 576 |
| 10.13.5 | Baujat              | 577 |
| 10.13.6 | Leave one out       | 578 |

|         |                                 |     |
|---------|---------------------------------|-----|
| 10.14   | Stricture . . . . .             | 579 |
| 10.14.1 | Meta-analysis . . . . .         | 579 |
| 10.14.2 | Forest plot . . . . .           | 580 |
| 10.14.3 | Trim and Fill . . . . .         | 581 |
| 10.14.4 | Funnel plot . . . . .           | 582 |
| 10.14.5 | Baujat . . . . .                | 583 |
| 10.14.6 | Leave one out . . . . .         | 584 |
| 10.15   | Embolisation required . . . . . | 585 |
| 10.15.1 | Meta-analysis . . . . .         | 585 |
| 10.15.2 | Forest plot . . . . .           | 586 |
| 10.15.3 | Trim and Fill . . . . .         | 587 |
| 10.15.4 | Funnel plot . . . . .           | 588 |
| 10.15.5 | Baujat . . . . .                | 589 |
| 10.15.6 | Leave one out . . . . .         | 590 |
| 10.16   | Transfusion . . . . .           | 591 |
| 10.16.1 | Meta-analysis . . . . .         | 591 |
| 10.16.2 | Forest plot . . . . .           | 592 |
| 10.16.3 | Trim and Fill . . . . .         | 593 |
| 10.16.4 | Funnel plot . . . . .           | 594 |
| 10.16.5 | Baujat . . . . .                | 595 |
| 10.16.6 | Leave one out . . . . .         | 596 |
| 10.17   | Clavien I . . . . .             | 597 |
| 10.17.1 | Meta-analysis . . . . .         | 597 |
| 10.17.2 | Forest plot . . . . .           | 598 |
| 10.17.3 | Trim and Fill . . . . .         | 599 |
| 10.17.4 | Funnel plot . . . . .           | 600 |
| 10.17.5 | Baujat . . . . .                | 601 |
| 10.17.6 | Leave one out . . . . .         | 602 |
| 10.18   | Clavien II . . . . .            | 603 |
| 10.18.1 | Meta-analysis . . . . .         | 603 |
| 10.18.2 | Forest plot . . . . .           | 604 |
| 10.18.3 | Trim and Fill . . . . .         | 605 |
| 10.18.4 | Funnel plot . . . . .           | 606 |
| 10.18.5 | Baujat . . . . .                | 607 |
| 10.18.6 | Leave one out . . . . .         | 608 |
| 10.19   | Clavien III . . . . .           | 609 |
| 10.19.1 | Meta-analysis . . . . .         | 609 |
| 10.19.2 | Forest plot . . . . .           | 610 |
| 10.19.3 | Trim and Fill . . . . .         | 611 |
| 10.19.4 | Funnel plot . . . . .           | 612 |
| 10.19.5 | Baujat . . . . .                | 613 |
| 10.19.6 | Leave one out . . . . .         | 614 |
| 10.20   | Clavien IV . . . . .            | 615 |
| 10.20.1 | Meta-analysis . . . . .         | 615 |
| 10.20.2 | Forest plot . . . . .           | 616 |
| 10.20.3 | Trim and Fill . . . . .         | 617 |
| 10.20.4 | Funnel plot . . . . .           | 618 |
| 10.20.5 | Baujat . . . . .                | 619 |
| 10.20.6 | Leave one out . . . . .         | 620 |
| 10.21   | Clavien V . . . . .             | 621 |
| 10.21.1 | Meta-analysis . . . . .         | 621 |
| 10.21.2 | Forest plot . . . . .           | 622 |
| 10.21.3 | Trim and Fill . . . . .         | 623 |
| 10.21.4 | Funnel plot . . . . .           | 624 |

|           |                                                                                         |            |
|-----------|-----------------------------------------------------------------------------------------|------------|
| 10.21.5   | Baujat . . . . .                                                                        | 625        |
| 10.21.6   | Leave one out . . . . .                                                                 | 626        |
| 10.22     | Clavien I-II . . . . .                                                                  | 627        |
| 10.22.1   | Meta-analysis . . . . .                                                                 | 627        |
| 10.22.2   | Forest plot . . . . .                                                                   | 628        |
| 10.22.3   | Trim and Fill . . . . .                                                                 | 629        |
| 10.22.4   | Funnel plot . . . . .                                                                   | 630        |
| 10.22.5   | Baujat . . . . .                                                                        | 631        |
| 10.22.6   | Leave one out . . . . .                                                                 | 632        |
| 10.23     | Clavien III-V . . . . .                                                                 | 633        |
| 10.23.1   | Meta-analysis . . . . .                                                                 | 633        |
| 10.23.2   | Forest plot . . . . .                                                                   | 634        |
| 10.23.3   | Trim and Fill . . . . .                                                                 | 635        |
| 10.23.4   | Funnel plot . . . . .                                                                   | 636        |
| 10.23.5   | Baujat . . . . .                                                                        | 637        |
| 10.23.6   | Leave one out . . . . .                                                                 | 638        |
| <b>11</b> | <b>Flexi URS only Summary Forest plots</b>                                              | <b>639</b> |
| 11.1      | Summary Table of number of studies for each outcome included in meta-analysis . . . . . | 643        |
| 11.2      | Summary Forest plot of Continuous outcomes . . . . .                                    | 644        |
| 11.2.1    | Continuous Outcomes Table . . . . .                                                     | 644        |
| 11.2.2    | Continuous Forest plot . . . . .                                                        | 645        |
| 11.3      | Summary Forest plot of Binary outcomes . . . . .                                        | 646        |
| 11.3.1    | Binary Outcomes Table . . . . .                                                         | 647        |
| 11.3.2    | Binary Forest plot - Meta-Analysis . . . . .                                            | 648        |
| <b>12</b> | <b>Mini-PCNL vs Flexi URS with Suction Meta-Analysis Outcomes</b>                       | <b>649</b> |
| 12.1      | Immediate SFR . . . . .                                                                 | 650        |
| 12.1.1    | Meta-analysis . . . . .                                                                 | 650        |
| 12.1.2    | Forest plot . . . . .                                                                   | 651        |
| 12.1.3    | Trim and Fill . . . . .                                                                 | 652        |
| 12.1.4    | Funnel plot . . . . .                                                                   | 653        |
| 12.1.5    | Baujat . . . . .                                                                        | 654        |
| 12.1.6    | Leave one out . . . . .                                                                 | 655        |
| 12.2      | Final SFR . . . . .                                                                     | 656        |
| 12.2.1    | Meta-analysis . . . . .                                                                 | 656        |
| 12.2.2    | Forest plot . . . . .                                                                   | 657        |
| 12.2.3    | Trim and Fill . . . . .                                                                 | 658        |
| 12.2.4    | Funnel plot . . . . .                                                                   | 659        |
| 12.2.5    | Baujat . . . . .                                                                        | 660        |
| 12.2.6    | Leave one out . . . . .                                                                 | 661        |
| 12.3      | OR time . . . . .                                                                       | 662        |
| 12.3.1    | Meta-analysis . . . . .                                                                 | 662        |
| 12.3.2    | Forest plot . . . . .                                                                   | 663        |
| 12.3.3    | Trim and Fill . . . . .                                                                 | 664        |
| 12.3.4    | Funnel plot . . . . .                                                                   | 665        |
| 12.3.5    | Baujat . . . . .                                                                        | 666        |
| 12.3.6    | Leave one out . . . . .                                                                 | 667        |
| 12.4      | Auxiliary Treatments . . . . .                                                          | 668        |
| 12.4.1    | Meta-analysis . . . . .                                                                 | 668        |
| 12.4.2    | Forest plot . . . . .                                                                   | 669        |
| 12.4.3    | Trim and Fill . . . . .                                                                 | 670        |
| 12.4.4    | Funnel plot . . . . .                                                                   | 671        |
| 12.4.5    | Baujat . . . . .                                                                        | 672        |

|         |                               |     |
|---------|-------------------------------|-----|
| 12.4.6  | Leave one out . . . . .       | 673 |
| 12.5    | VAS . . . . .                 | 674 |
| 12.5.1  | Meta-analysis . . . . .       | 674 |
| 12.5.2  | Forest plot . . . . .         | 675 |
| 12.5.3  | Trim and Fill . . . . .       | 676 |
| 12.5.4  | Funnel plot . . . . .         | 677 |
| 12.5.5  | Baujat . . . . .              | 678 |
| 12.5.6  | Leave one out . . . . .       | 679 |
| 12.6    | LoS . . . . .                 | 680 |
| 12.6.1  | Meta-analysis . . . . .       | 680 |
| 12.6.2  | Forest plot . . . . .         | 681 |
| 12.6.3  | Trim and Fill . . . . .       | 682 |
| 12.6.4  | Funnel plot . . . . .         | 683 |
| 12.6.5  | Baujat . . . . .              | 684 |
| 12.6.6  | Leave one out . . . . .       | 685 |
| 12.7    | Complications - All . . . . . | 686 |
| 12.7.1  | Meta-analysis . . . . .       | 686 |
| 12.7.2  | Forest plot . . . . .         | 687 |
| 12.7.3  | Trim and Fill . . . . .       | 688 |
| 12.7.4  | Funnel plot . . . . .         | 689 |
| 12.7.5  | Baujat . . . . .              | 690 |
| 12.7.6  | Leave one out . . . . .       | 691 |
| 12.8    | Fever . . . . .               | 692 |
| 12.8.1  | Meta-analysis . . . . .       | 692 |
| 12.8.2  | Forest plot . . . . .         | 693 |
| 12.8.3  | Trim and Fill . . . . .       | 694 |
| 12.8.4  | Funnel plot . . . . .         | 695 |
| 12.8.5  | Baujat . . . . .              | 696 |
| 12.8.6  | Leave one out . . . . .       | 697 |
| 12.9    | Infections . . . . .          | 698 |
| 12.9.1  | Meta-analysis . . . . .       | 698 |
| 12.9.2  | Forest plot . . . . .         | 699 |
| 12.9.3  | Trim and Fill . . . . .       | 700 |
| 12.9.4  | Funnel plot . . . . .         | 701 |
| 12.9.5  | Baujat . . . . .              | 702 |
| 12.9.6  | Leave one out . . . . .       | 703 |
| 12.10   | Sepsis . . . . .              | 704 |
| 12.10.1 | Meta-analysis . . . . .       | 704 |
| 12.10.2 | Forest plot . . . . .         | 705 |
| 12.10.3 | Trim and Fill . . . . .       | 706 |
| 12.10.4 | Funnel plot . . . . .         | 707 |
| 12.10.5 | Baujat . . . . .              | 708 |
| 12.10.6 | Leave one out . . . . .       | 709 |
| 12.11   | Abscess . . . . .             | 710 |
| 12.11.1 | Meta-analysis . . . . .       | 710 |
| 12.11.2 | Forest plot . . . . .         | 711 |
| 12.11.3 | Trim and Fill . . . . .       | 712 |
| 12.11.4 | Funnel plot . . . . .         | 713 |
| 12.11.5 | Baujat . . . . .              | 714 |
| 12.11.6 | Leave one out . . . . .       | 715 |
| 12.12   | Haematoma . . . . .           | 716 |
| 12.12.1 | Meta-analysis . . . . .       | 716 |
| 12.12.2 | Forest plot . . . . .         | 717 |
| 12.12.3 | Trim and Fill . . . . .       | 718 |

|         |                                 |     |
|---------|---------------------------------|-----|
| 12.12.4 | Funnel plot . . . . .           | 719 |
| 12.12.5 | Baujat . . . . .                | 720 |
| 12.12.6 | Leave one out . . . . .         | 721 |
| 12.13   | Pain . . . . .                  | 722 |
| 12.13.1 | Meta-analysis . . . . .         | 722 |
| 12.13.2 | Forest plot . . . . .           | 723 |
| 12.13.3 | Trim and Fill . . . . .         | 724 |
| 12.13.4 | Funnel plot . . . . .           | 725 |
| 12.13.5 | Baujat . . . . .                | 726 |
| 12.13.6 | Leave one out . . . . .         | 727 |
| 12.14   | Stricture . . . . .             | 728 |
| 12.14.1 | Meta-analysis . . . . .         | 728 |
| 12.14.2 | Forest plot . . . . .           | 729 |
| 12.14.3 | Trim and Fill . . . . .         | 730 |
| 12.14.4 | Funnel plot . . . . .           | 731 |
| 12.14.5 | Baujat . . . . .                | 732 |
| 12.14.6 | Leave one out . . . . .         | 733 |
| 12.15   | Embolisation required . . . . . | 734 |
| 12.15.1 | Meta-analysis . . . . .         | 734 |
| 12.15.2 | Forest plot . . . . .           | 735 |
| 12.15.3 | Trim and Fill . . . . .         | 736 |
| 12.15.4 | Funnel plot . . . . .           | 737 |
| 12.15.5 | Baujat . . . . .                | 738 |
| 12.15.6 | Leave one out . . . . .         | 739 |
| 12.16   | Transfusion . . . . .           | 740 |
| 12.16.1 | Meta-analysis . . . . .         | 740 |
| 12.16.2 | Forest plot . . . . .           | 741 |
| 12.16.3 | Trim and Fill . . . . .         | 742 |
| 12.16.4 | Funnel plot . . . . .           | 743 |
| 12.16.5 | Baujat . . . . .                | 744 |
| 12.16.6 | Leave one out . . . . .         | 745 |
| 12.17   | Clavien I . . . . .             | 746 |
| 12.17.1 | Meta-analysis . . . . .         | 746 |
| 12.17.2 | Forest plot . . . . .           | 747 |
| 12.17.3 | Trim and Fill . . . . .         | 748 |
| 12.17.4 | Funnel plot . . . . .           | 749 |
| 12.17.5 | Baujat . . . . .                | 750 |
| 12.17.6 | Leave one out . . . . .         | 751 |
| 12.18   | Clavien II . . . . .            | 752 |
| 12.18.1 | Meta-analysis . . . . .         | 752 |
| 12.18.2 | Forest plot . . . . .           | 753 |
| 12.18.3 | Trim and Fill . . . . .         | 754 |
| 12.18.4 | Funnel plot . . . . .           | 755 |
| 12.18.5 | Baujat . . . . .                | 756 |
| 12.18.6 | Leave one out . . . . .         | 757 |
| 12.19   | Clavien III . . . . .           | 758 |
| 12.19.1 | Meta-analysis . . . . .         | 758 |
| 12.19.2 | Forest plot . . . . .           | 759 |
| 12.19.3 | Trim and Fill . . . . .         | 760 |
| 12.19.4 | Funnel plot . . . . .           | 761 |
| 12.19.5 | Baujat . . . . .                | 762 |
| 12.19.6 | Leave one out . . . . .         | 763 |
| 12.20   | Clavien IV . . . . .            | 764 |
| 12.20.1 | Meta-analysis . . . . .         | 764 |



|                                                                                    |            |
|------------------------------------------------------------------------------------|------------|
| 12.20.2 Forest plot                                                                | 765        |
| 12.20.3 Trim and Fill                                                              | 766        |
| 12.20.4 Funnel plot                                                                | 767        |
| 12.20.5 Baujat                                                                     | 768        |
| 12.20.6 Leave one out                                                              | 769        |
| 12.21 Clavien V                                                                    | 770        |
| 12.21.1 Meta-analysis                                                              | 770        |
| 12.21.2 Forest plot                                                                | 771        |
| 12.21.3 Trim and Fill                                                              | 772        |
| 12.21.4 Funnel plot                                                                | 773        |
| 12.21.5 Baujat                                                                     | 774        |
| 12.21.6 Leave one out                                                              | 775        |
| 12.22 Clavien I-II                                                                 | 776        |
| 12.22.1 Meta-analysis                                                              | 776        |
| 12.22.2 Forest plot                                                                | 777        |
| 12.22.3 Trim and Fill                                                              | 778        |
| 12.22.4 Funnel plot                                                                | 779        |
| 12.22.5 Baujat                                                                     | 780        |
| 12.22.6 Leave one out                                                              | 781        |
| 12.23 Clavien III-V                                                                | 782        |
| 12.23.1 Meta-analysis                                                              | 782        |
| 12.23.2 Forest plot                                                                | 783        |
| 12.23.3 Trim and Fill                                                              | 784        |
| 12.23.4 Funnel plot                                                                | 785        |
| 12.23.5 Baujat                                                                     | 786        |
| 12.23.6 Leave one out                                                              | 787        |
| <b>13 Mini-PCNL vs Flexi URS Summary Forest plots</b>                              | <b>788</b> |
| 13.1 Summary Table of number of studies for each outcome included in meta-analysis | 792        |
| 13.2 Summary Forest plot of Continuous outcomes                                    | 793        |
| 13.2.1 Continuous Outcomes Table                                                   | 793        |
| 13.2.2 Continuous Forest plot                                                      | 794        |
| 13.3 Summary Forest plot of Binary outcomes                                        | 795        |
| 13.3.1 Binary Outcomes Table                                                       | 796        |
| 13.3.2 Binary Forest plot - Meta-Analysis                                          | 797        |

## 1 Setup

```
knitr::opts_chunk$set(echo = TRUE)
library(tidyverse)

## -- Attaching core tidyverse packages ----- tidyverse 2.0.0 --
## v dplyr      1.1.4      v readr      2.1.4
## v forcats    1.0.0      v stringr    1.5.1
## v ggplot2    3.4.4      v tibble     3.2.1
## v lubridate  1.9.2      v tidyr      1.3.0
## v purrr      1.0.2
## -- Conflicts ----- tidyverse_conflicts() --
## x dplyr::filter() masks stats::filter()
## x dplyr::lag()     masks stats::lag()
## i Use the conflicted package (<http://conflicted.r-lib.org/>) to force all conflicts to become errors

library(gt)
library(gtExtras)
```

```
library(meta)
```

```
## Loading 'meta' package (version 6.5-0).  
## Type 'help(meta)' for a brief overview.  
## Readers of 'Meta-Analysis with R (Use R!)' should install  
## older version of 'meta' package: https://tinyurl.com/dt4y5drs
```

```
library(metafor)
```

```
## Loading required package: Matrix  
##  
## Attaching package: 'Matrix'  
##  
## The following objects are masked from 'package:tidyr':  
##  
##   expand, pack, unpack  
##  
## Loading required package: metadat  
## Loading required package: numDeriv  
##  
## Loading the 'metafor' package (version 4.2-0). For an  
## introduction to the package please type: help(metafor)
```

```
library(janitor)
```

```
##  
## Attaching package: 'janitor'  
##  
## The following objects are masked from 'package:stats':  
##  
##   chisq.test, fisher.test
```

```
library(DataExplorer)
```

```
library(forestplot)
```

```
## Loading required package: grid  
## Loading required package: checkmate  
## Loading required package: abind
```

```
suction_data <- read.csv("~/Desktop/Somani/Suction/suction_urs.csv") %>% as_tibble() %>% janitor::clean_names()
```

## 1.1 Data Encoding

```
#Define Demographics
suction_data$design <- as.factor(suction_data$design)
suction_data$number_of_surgeons_control <- as.integer(suction_data$number_of_surgeons_control)

## Warning: NAs introduced by coercion
suction_data$number_of_surgeons_suction<- as.integer(suction_data$number_of_surgeons_suction)

## Warning: NAs introduced by coercion
suction_data$age_mean_control <- as.numeric(suction_data$age_mean_control)

## Warning: NAs introduced by coercion
suction_data$age_sd_control <- as.numeric(suction_data$age_sd_control)

## Warning: NAs introduced by coercion
suction_data$age_mean_suction <- as.numeric(suction_data$age_mean_suction)

## Warning: NAs introduced by coercion
suction_data$age_sd_suction <- as.numeric(suction_data$age_sd_suction)

## Warning: NAs introduced by coercion
suction_data$male_n_control <- as.integer(suction_data$male_n_control)

## Warning: NAs introduced by coercion
suction_data$male_n_suction <- as.integer(suction_data$male_n_suction)

## Warning: NAs introduced by coercion
suction_data$bmi_mean_control <- as.numeric(suction_data$bmi_mean_control)

## Warning: NAs introduced by coercion
suction_data$bmi_sd_control <- as.numeric(suction_data$bmi_sd_control)

## Warning: NAs introduced by coercion
suction_data$bmi_mean_suction <- as.numeric(suction_data$bmi_mean_suction)

## Warning: NAs introduced by coercion
suction_data$bmi_sd_suction <- as.numeric(suction_data$bmi_sd_suction)

## Warning: NAs introduced by coercion
suction_data$hu_mean_control <- as.numeric(suction_data$hu_mean_control)

## Warning: NAs introduced by coercion
suction_data$hu_sd_control <- as.numeric(suction_data$hu_sd_control)

## Warning: NAs introduced by coercion
suction_data$hu_mean_suction <- as.numeric(suction_data$hu_mean_suction)

## Warning: NAs introduced by coercion
```

```

suction_data$hu_sd_suction <- as.numeric(suction_data$hu_sd_suction)

## Warning: NAs introduced by coercion
suction_data$stone_size_mm_mean_control <- as.numeric(suction_data$stone_size_mm_mean_control)

## Warning: NAs introduced by coercion
suction_data$stone_size_mm_sd_control <- as.numeric(suction_data$stone_size_mm_sd_control)

## Warning: NAs introduced by coercion
suction_data$stone_size_mm_mean_suction <- as.numeric(suction_data$stone_size_mm_mean_suction)

## Warning: NAs introduced by coercion
suction_data$stone_size_mm_sd_suction <- as.numeric(suction_data$stone_size_mm_sd_suction)

## Warning: NAs introduced by coercion
suction_data$stone_surface_mm2_mean_control <- as.numeric(suction_data$stone_surface_mm2_mean_control)

## Warning: NAs introduced by coercion
suction_data$stone_surface_mm2_sd_control <- as.numeric(suction_data$stone_surface_mm2_sd_control)

## Warning: NAs introduced by coercion
suction_data$stone_surface_mm2_mean_suction <- as.numeric(suction_data$stone_surface_mm2_mean_suction)

## Warning: NAs introduced by coercion
suction_data$stone_surface_mm2_sd_suction <- as.numeric(suction_data$stone_surface_mm2_sd_suction)

## Warning: NAs introduced by coercion
suction_data$stone_burden_mm3_mean_control <- as.numeric(suction_data$stone_burden_mm3_mean_control)

## Warning: NAs introduced by coercion
suction_data$stone_burden_mm3_sd_control <- as.numeric(suction_data$stone_burden_mm3_sd_control)

## Warning: NAs introduced by coercion
suction_data$stone_burden_mm3_mean_suction <- as.numeric(suction_data$stone_burden_mm3_mean_suction)

## Warning: NAs introduced by coercion
suction_data$stone_burden_mm3_sd_suction <- as.numeric(suction_data$stone_burden_mm3_sd_suction)

## Warning: NAs introduced by coercion
suction_data$upper_ureter_n_control <- as.integer(suction_data$upper_ureter_n_control)

## Warning: NAs introduced by coercion
suction_data$upper_ureter_n_suction <- as.integer(suction_data$upper_ureter_n_suction)

## Warning: NAs introduced by coercion
suction_data$mid_ureter_n_control <- as.integer(suction_data$mid_ureter_n_control)

## Warning: NAs introduced by coercion
suction_data$mid_ureter_n_suction <- as.integer(suction_data$mid_ureter_n_suction)

```

```

## Warning: NAs introduced by coercion
suction_data$distal_ureter_n_control <- as.integer(suction_data$distal_ureter_n_control)

## Warning: NAs introduced by coercion
suction_data$distal_ureter_n_suction <- as.integer(suction_data$distal_ureter_n_suction)

## Warning: NAs introduced by coercion
suction_data$renal_pelvis_n_control <- as.integer(suction_data$renal_pelvis_n_control)

## Warning: NAs introduced by coercion
suction_data$renal_pelvis_n_suction <- as.integer(suction_data$renal_pelvis_n_suction)

## Warning: NAs introduced by coercion
suction_data$upper_calyx_n_control <- as.integer(suction_data$upper_calyx_n_control)

## Warning: NAs introduced by coercion
suction_data$upper_calyx_n_suction <- as.integer(suction_data$upper_calyx_n_suction)

## Warning: NAs introduced by coercion
suction_data$middle_calyx_n_control <- as.integer(suction_data$middle_calyx_n_control)

## Warning: NAs introduced by coercion
suction_data$middle_calyx_n_suction <- as.integer(suction_data$middle_calyx_n_suction)

## Warning: NAs introduced by coercion
suction_data$lower_calyx_n_control <- as.integer(suction_data$lower_calyx_n_control)

## Warning: NAs introduced by coercion
suction_data$lower_calxy_n_suction <- as.integer(suction_data$lower_calxy_n_suction)

## Warning: NAs introduced by coercion
# Define Outcomes
suction_data$sfr_immediate_n_control <- as.integer(suction_data$sfr_immediate_n_control)

## Warning: NAs introduced by coercion
suction_data$sfr_immediate_n_suction <- as.integer(suction_data$sfr_immediate_n_suction)

## Warning: NAs introduced by coercion
suction_data$sfr_final_n_control <- as.integer(suction_data$sfr_final_n_control)

## Warning: NAs introduced by coercion
suction_data$sfr_final_n_suction <- as.integer(suction_data$sfr_final_n_suction)

## Warning: NAs introduced by coercion
suction_data$auxillary_tx_n_control <- as.integer(suction_data$auxillary_tx_n_control)

## Warning: NAs introduced by coercion
suction_data$auxillary_tx_n_suction <- as.integer(suction_data$auxillary_tx_n_suction)

## Warning: NAs introduced by coercion

```

```

suction_data$or_time_min_mean_control <- as.numeric(suction_data$or_time_min_mean_control)

## Warning: NAs introduced by coercion
suction_data$or_time_min_sd_control <- as.numeric(suction_data$or_time_min_sd_control)

## Warning: NAs introduced by coercion
suction_data$or_time_min_mean_suction <- as.numeric(suction_data$or_time_min_mean_suction)

## Warning: NAs introduced by coercion
suction_data$or_time_min_sd_suction <- as.numeric(suction_data$or_time_min_sd_suction)

## Warning: NAs introduced by coercion
suction_data$fragmentation_time_min_mean_control <- as.numeric(suction_data$fragmentation_time_min_mean_control)

## Warning: NAs introduced by coercion
suction_data$fragmentation_time_min_sd_control <- as.numeric(suction_data$fragmentation_time_min_sd_control)

## Warning: NAs introduced by coercion
suction_data$fragmentation_time_min_mean_suction <- as.numeric(suction_data$fragmentation_time_min_mean_suction)

## Warning: NAs introduced by coercion
suction_data$fragmentation_time_min_sd_suction <- as.numeric(suction_data$fragmentation_time_min_sd_suction)

## Warning: NAs introduced by coercion
suction_data$fluoroscopy_time_sec_mean_control <- as.numeric(suction_data$fluoroscopy_time_sec_mean_control)

## Warning: NAs introduced by coercion
suction_data$fluoroscopy_time_sec_sd_control <- as.numeric(suction_data$fluoroscopy_time_sec_sd_control)

## Warning: NAs introduced by coercion
suction_data$fluoroscopy_time_sec_mean_suction <- as.numeric(suction_data$fluoroscopy_time_sec_mean_suction)

## Warning: NAs introduced by coercion
suction_data$fluoroscopy_time_sec_sd_suction <- as.numeric(suction_data$fluoroscopy_time_sec_sd_suction)

## Warning: NAs introduced by coercion
suction_data$use_of_baskets_n_control <- as.integer(suction_data$use_of_baskets_n_control)

## Warning: NAs introduced by coercion
suction_data$use_of_baskets_n_suction <- as.integer(suction_data$use_of_baskets_n_suction)

## Warning: NAs introduced by coercion
suction_data$intrapelvic_pressure_mm_hg_mean_control <- as.numeric(suction_data$intrapelvic_pressure_mm_hg_mean_control)

## Warning: NAs introduced by coercion
suction_data$intrapelvic_pressure_mm_hg_mean_suction <- as.numeric(suction_data$intrapelvic_pressure_mm_hg_mean_suction)

## Warning: NAs introduced by coercion

```

```

suction_data$los_days_mean_control <- as.numeric(suction_data$los_days_mean_control)

## Warning: NAs introduced by coercion
suction_data$los_days_sd_control <- as.numeric(suction_data$los_days_sd_control)

## Warning: NAs introduced by coercion
suction_data$los_days_mean_suction <- as.numeric(suction_data$los_days_mean_suction)

## Warning: NAs introduced by coercion
suction_data$los_days_sd_suction <- as.numeric(suction_data$los_days_sd_suction)

## Warning: NAs introduced by coercion
suction_data$complications_postop_overall_n_control <- as.integer(suction_data$complications_postop_overall_n_control)

## Warning: NAs introduced by coercion
suction_data$complications_postop_overall_n_suction <- as.integer(suction_data$complications_postop_overall_n_suction)

## Warning: NAs introduced by coercion
suction_data$infection_n_control <- as.integer(suction_data$infection_n_control)

## Warning: NAs introduced by coercion
suction_data$infection_n_suction <- as.integer(suction_data$infection_n_suction)

## Warning: NAs introduced by coercion
suction_data$fever_n_control <- as.integer(suction_data$fever_n_control)

## Warning: NAs introduced by coercion
suction_data$fever_n_suction <- as.integer(suction_data$fever_n_suction)

## Warning: NAs introduced by coercion
suction_data$abscess_n_control <- as.integer(suction_data$abscess_n_control)

## Warning: NAs introduced by coercion
suction_data$abscess_n_suction <- as.integer(suction_data$abscess_n_suction)

## Warning: NAs introduced by coercion
suction_data$sepsis_n_control <- as.integer(suction_data$sepsis_n_control)

## Warning: NAs introduced by coercion
suction_data$sepsis_n_suction <- as.integer(suction_data$sepsis_n_suction)

## Warning: NAs introduced by coercion
suction_data$pain_n_control <- as.integer(suction_data$pain_n_control)

## Warning: NAs introduced by coercion
suction_data$pain_n_suction <- as.integer(suction_data$pain_n_suction)

## Warning: NAs introduced by coercion

```

```

suction_data$hematoma_n_control <- as.integer(suction_data$hematoma_n_control)

## Warning: NAs introduced by coercion
suction_data$hematoma_n_suction <- as.integer(suction_data$hematoma_n_suction)

## Warning: NAs introduced by coercion
suction_data$transfusion_n_control <- as.integer(suction_data$transfusion_n_control)

## Warning: NAs introduced by coercion
suction_data$transfusion_n_suction <- as.integer(suction_data$transfusion_n_suction)

## Warning: NAs introduced by coercion
suction_data$embolism_ir_intervention_n_control <- as.integer(suction_data$embolism_ir_intervention_n_control)

## Warning: NAs introduced by coercion
suction_data$embolism_ir_intervention_n_suction <- as.integer(suction_data$embolism_ir_intervention_n_suction)

## Warning: NAs introduced by coercion
suction_data$cost_us_dollars_mean_control <- as.numeric(suction_data$cost_us_dollars_mean_control)

## Warning: NAs introduced by coercion
suction_data$cost_us_dollars_sd_control <- as.numeric(suction_data$cost_us_dollars_sd_control)

## Warning: NAs introduced by coercion
suction_data$cost_us_dollars_mean_suction <- as.numeric(suction_data$cost_us_dollars_mean_suction)

## Warning: NAs introduced by coercion
suction_data$cost_us_dollars_sd_suction <- as.numeric(suction_data$cost_us_dollars_sd_suction)

## Warning: NAs introduced by coercion
suction_data$clavien_i_n_control <- as.integer(suction_data$clavien_i_n_control)

## Warning: NAs introduced by coercion
suction_data$clavien_ii_n_control <- as.integer(suction_data$clavien_ii_n_control)

## Warning: NAs introduced by coercion
suction_data$clavien_iii_n_control <- as.integer(suction_data$clavien_iii_n_control)

## Warning: NAs introduced by coercion
suction_data$clavien_iv_n_control <- as.integer(suction_data$clavien_iv_n_control)

## Warning: NAs introduced by coercion
suction_data$clavien_v_n_control <- as.integer(suction_data$clavien_v_n_control)
suction_data$clavien_i_n_suction <- as.integer(suction_data$clavien_i_n_suction)

## Warning: NAs introduced by coercion
suction_data$clavien_ii_n_suction <- as.integer(suction_data$clavien_ii_n_suction)

## Warning: NAs introduced by coercion

```



```

suction_data$clavien_iii_n_suction <- as.integer(suction_data$clavien_iii_n_suction)

## Warning: NAs introduced by coercion
suction_data$clavien_iv_n_suction <- as.integer(suction_data$clavien_iv_n_suction)

## Warning: NAs introduced by coercion
suction_data$clavien_v_n_suction <- as.integer(suction_data$clavien_v_n_suction)
suction_data$death_n_control <- as.integer(suction_data$death_n_control)

## Warning: NAs introduced by coercion
suction_data$death_n_suction <- as.integer(suction_data$death_n_suction)

## Warning: NAs introduced by coercion
suction_data$vas_score_mean_suction <- as.numeric(suction_data$vas_score_mean_suction)

## Warning: NAs introduced by coercion
suction_data$vas_score_sd_suction <- as.numeric(suction_data$vas_score_sd_suction)

## Warning: NAs introduced by coercion
suction_data$vas_score_mean_control <- as.numeric(suction_data$vas_score_mean_control)

## Warning: NAs introduced by coercion
suction_data$vas_score_sd_control <- as.numeric(suction_data$vas_score_sd_control)

## Warning: NAs introduced by coercion
suction_data$stricture_n_control <- as.integer(suction_data$stricture_n_control)

## Warning: NAs introduced by coercion
suction_data$stricture_n_suction <- as.integer(suction_data$stricture_n_suction)

## Warning: NAs introduced by coercion

```

## 1.2 Make new columns combining CD

```
suction_data <- suction_data %>% mutate(  
  clav_i_ii_n_control = clavien_i_n_control + clavien_ii_n_control,  
  clav_i_ii_n_suction = clavien_i_n_suction + clavien_ii_n_suction,  
  clav_iii_v_n_control = clavien_iii_n_control + clavien_iv_n_control + clavien_v_n_control,  
  clav_iii_v_n_suction = clavien_iii_n_suction + clavien_iv_n_suction + clavien_v_n_suction  
)
```

## 2 Data Exploration

```
plot_missing(suction_data[1:10])
```

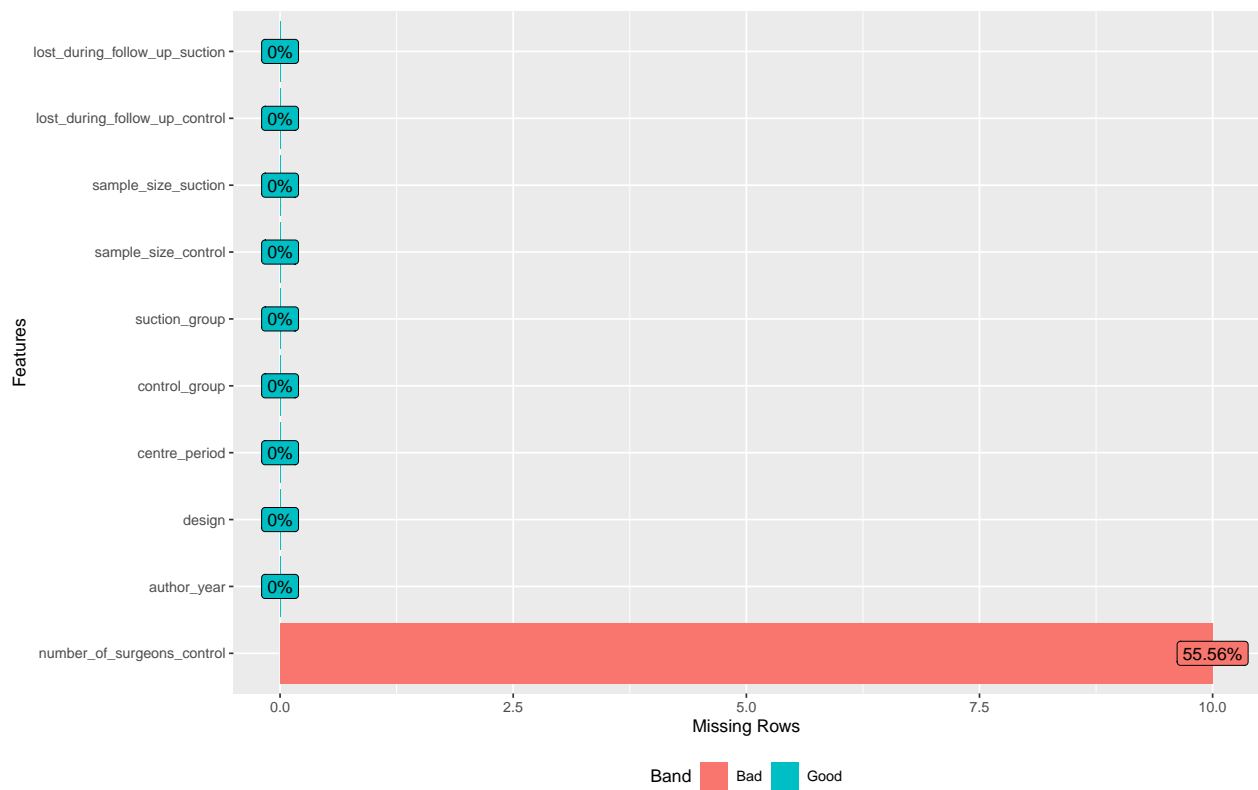

```
plot_missing(suction_data[11:20])
```

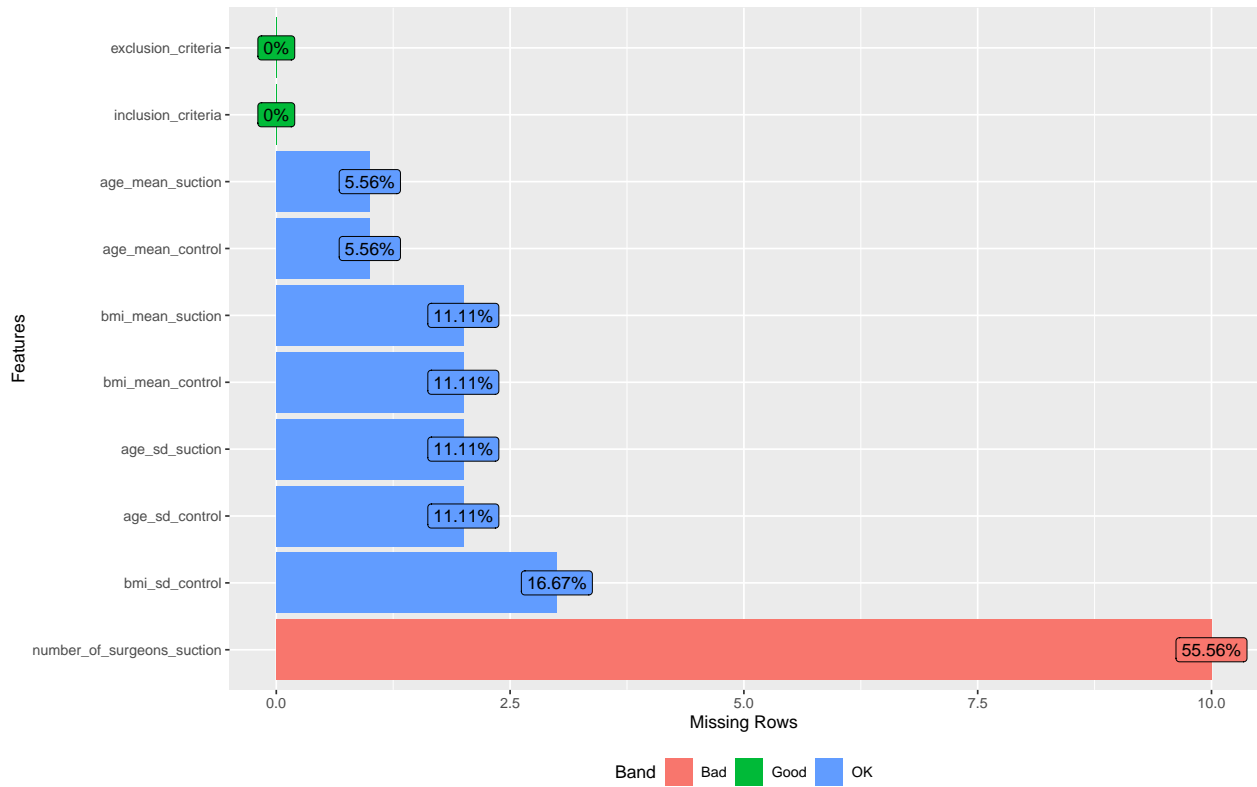

```
plot_missing(suction_data[21:30])
```

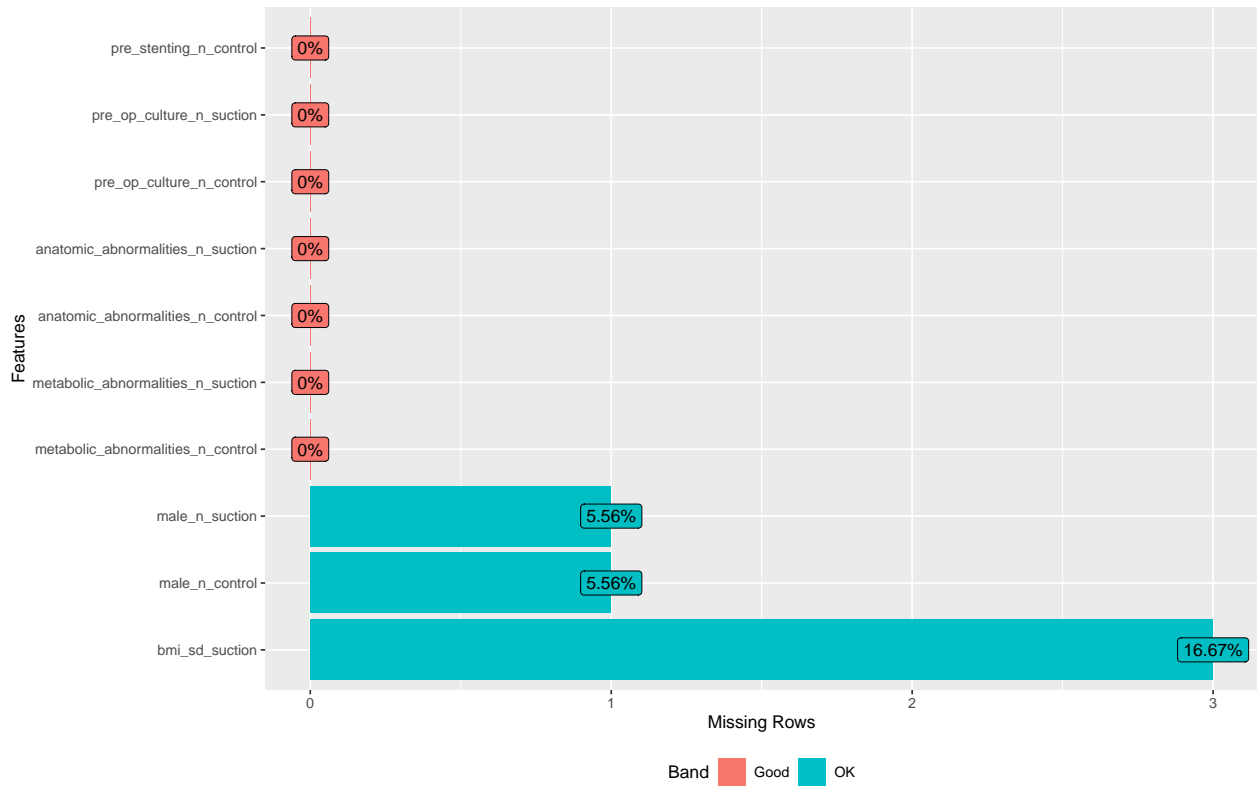

```
plot_missing(suction_data[31:40])
```

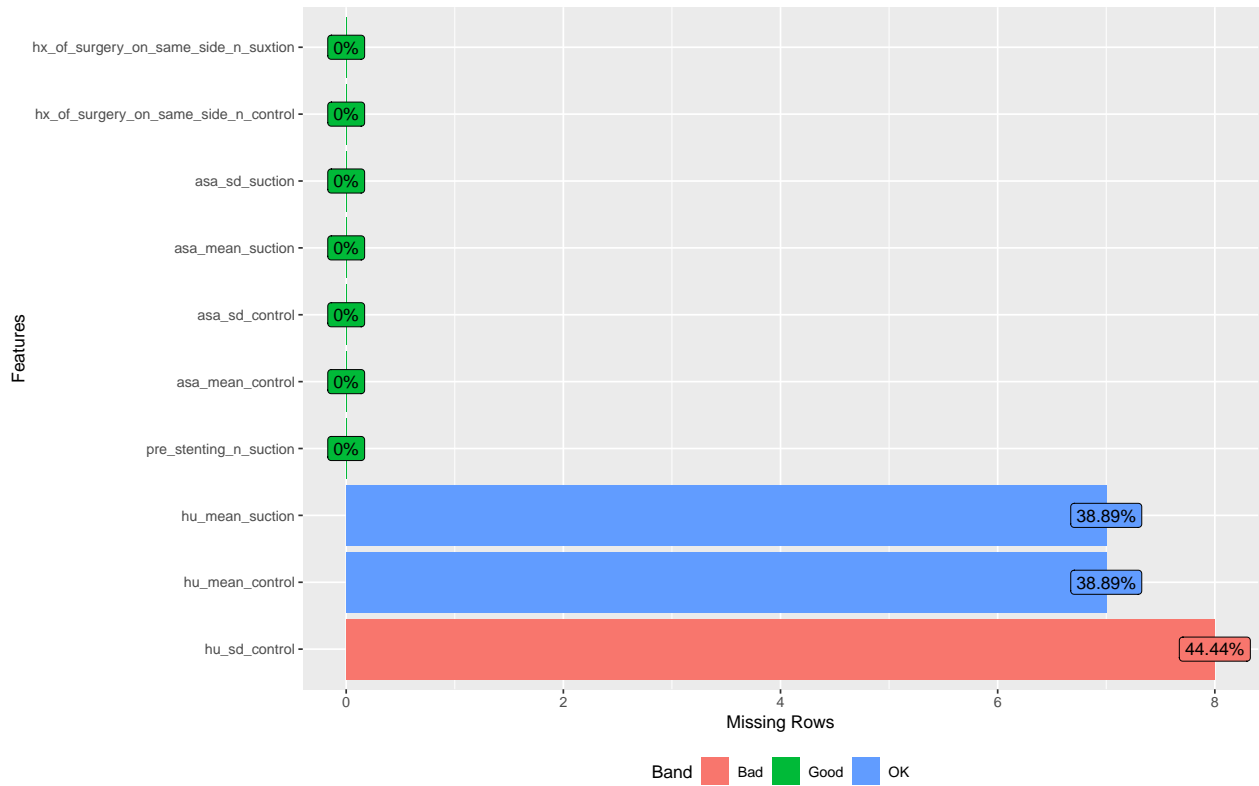

```
plot_missing(suction_data[41:50])
```

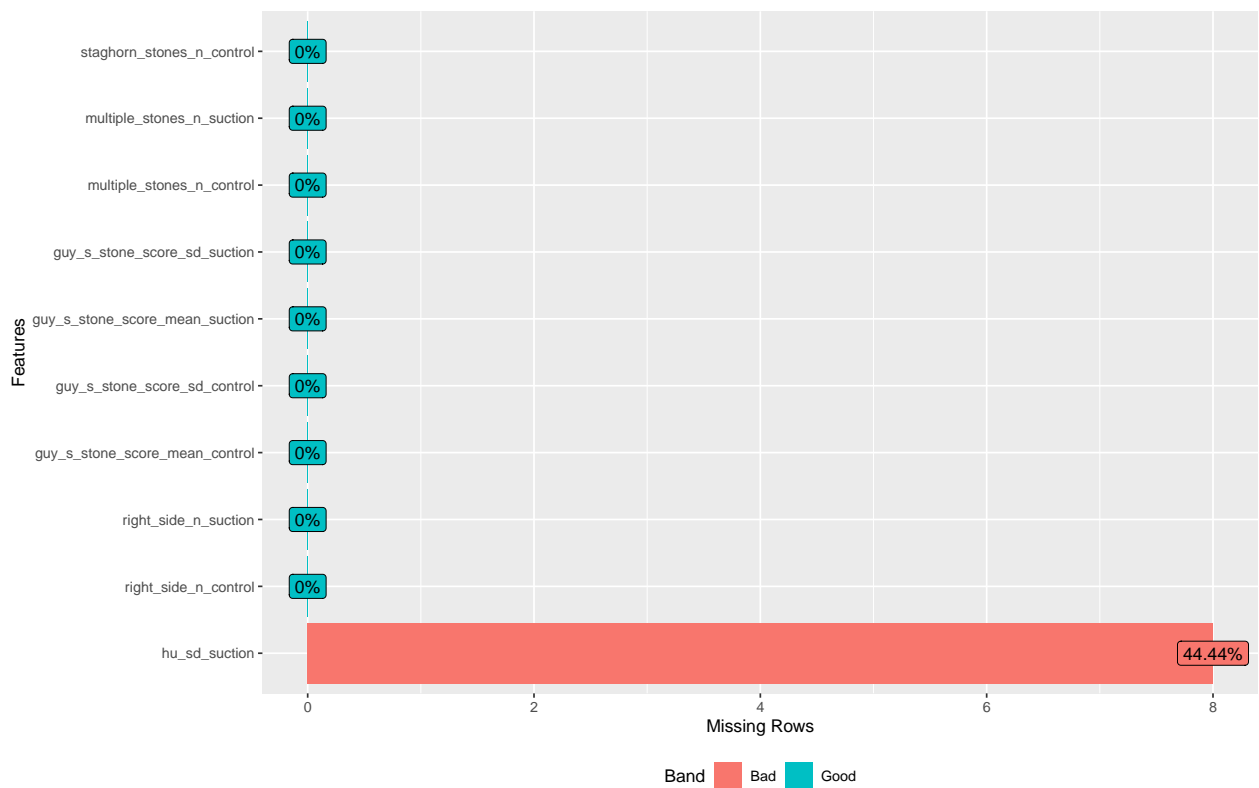

```
plot_missing(suction_data[51:60])
```

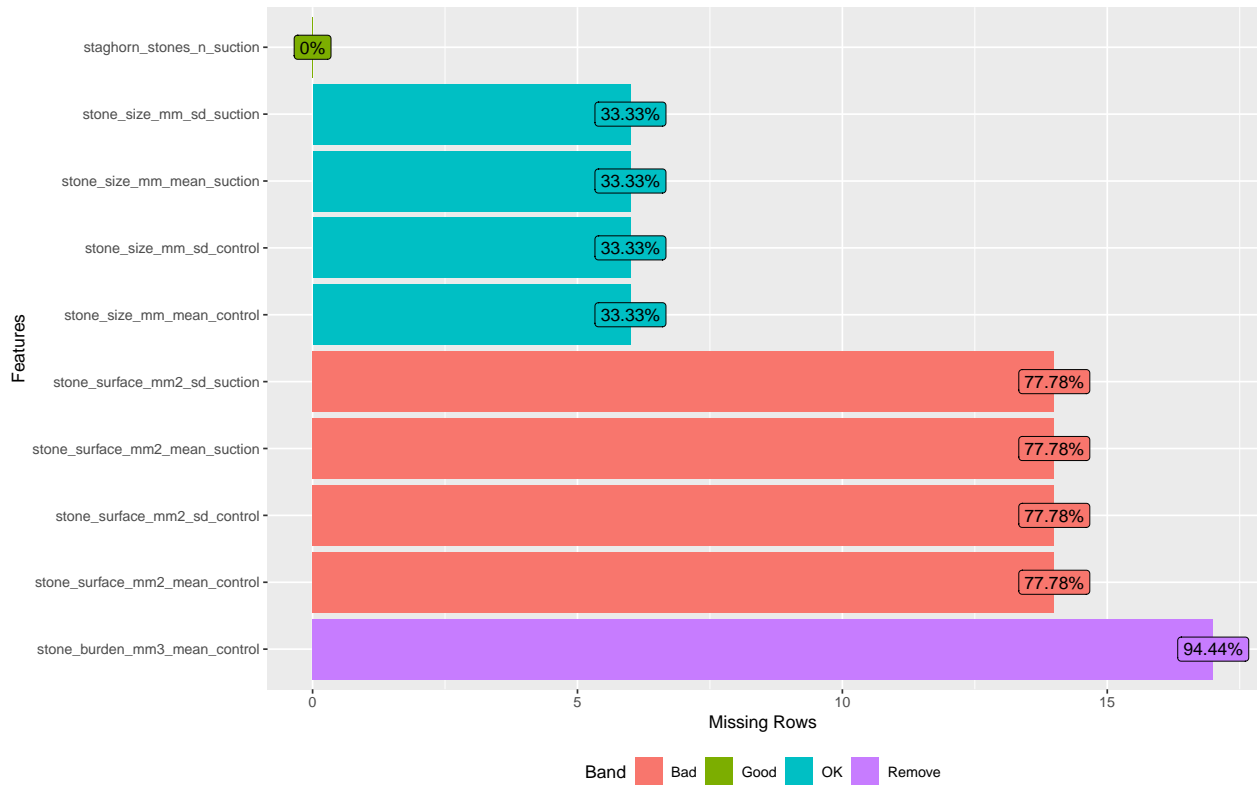

```
plot_missing(suction_data[61:70])
```

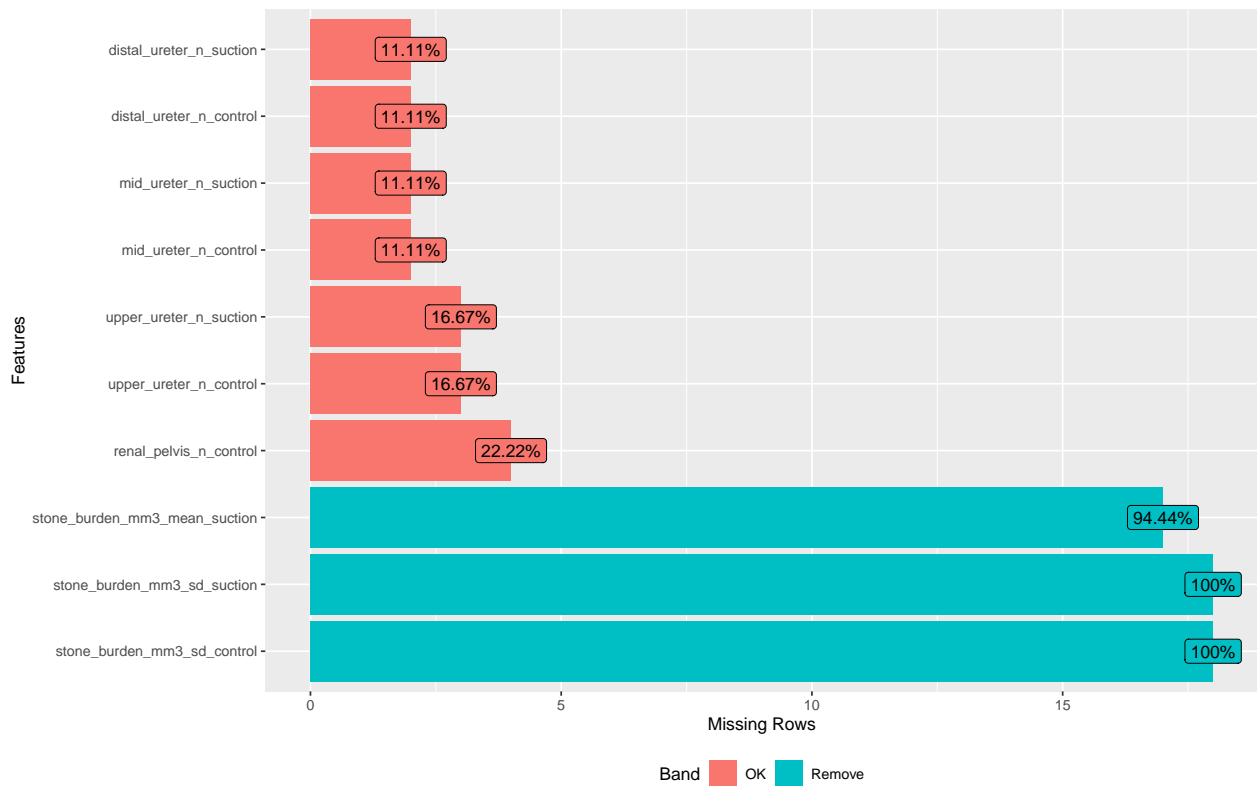

plot\_missing(suction\_data[71:80])

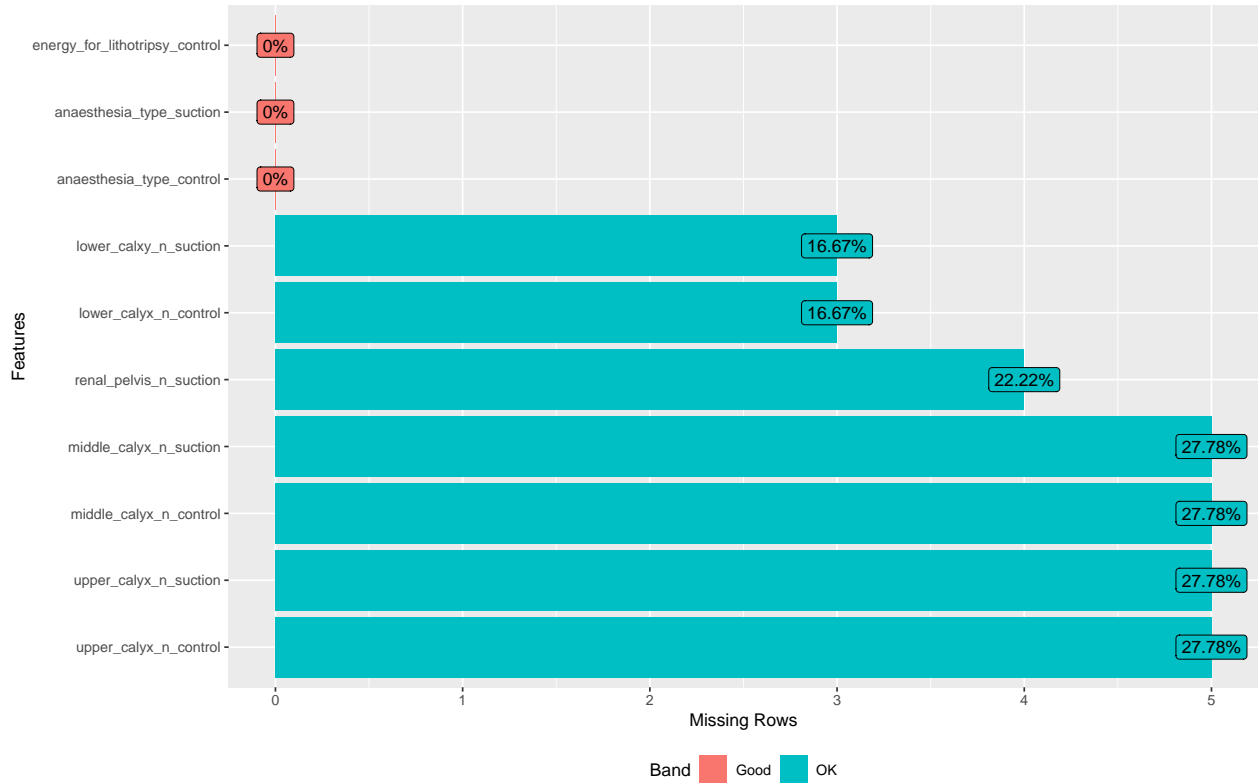

plot\_missing(suction\_data[81:90])

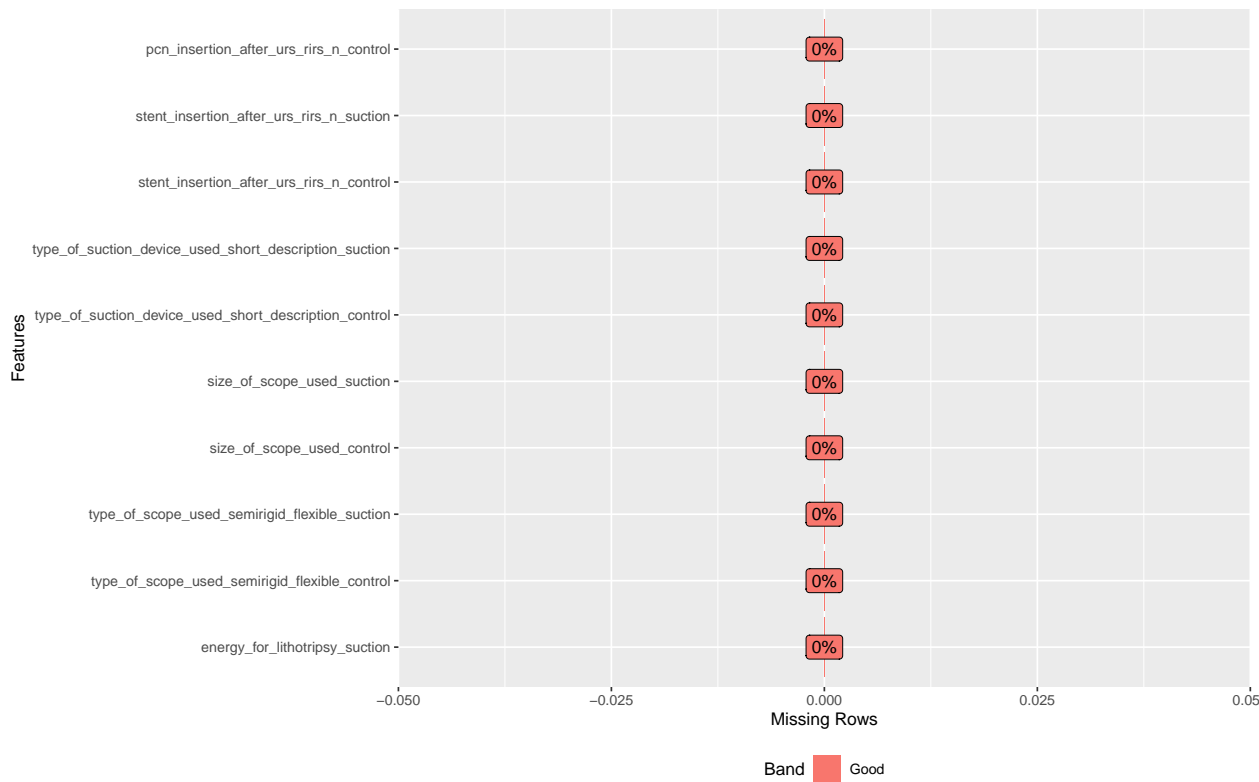

plot\_missing(suction\_data[91:100])

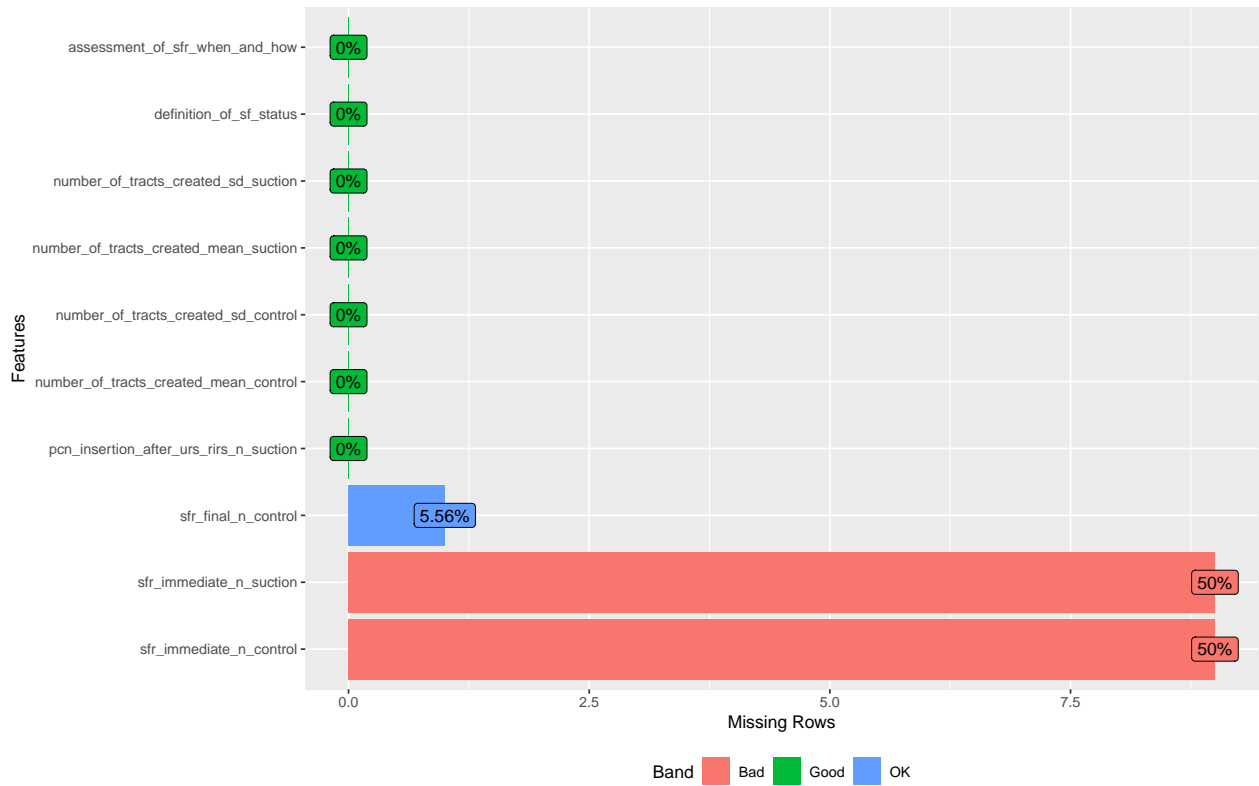

plot\_missing(suction\_data[101:110])

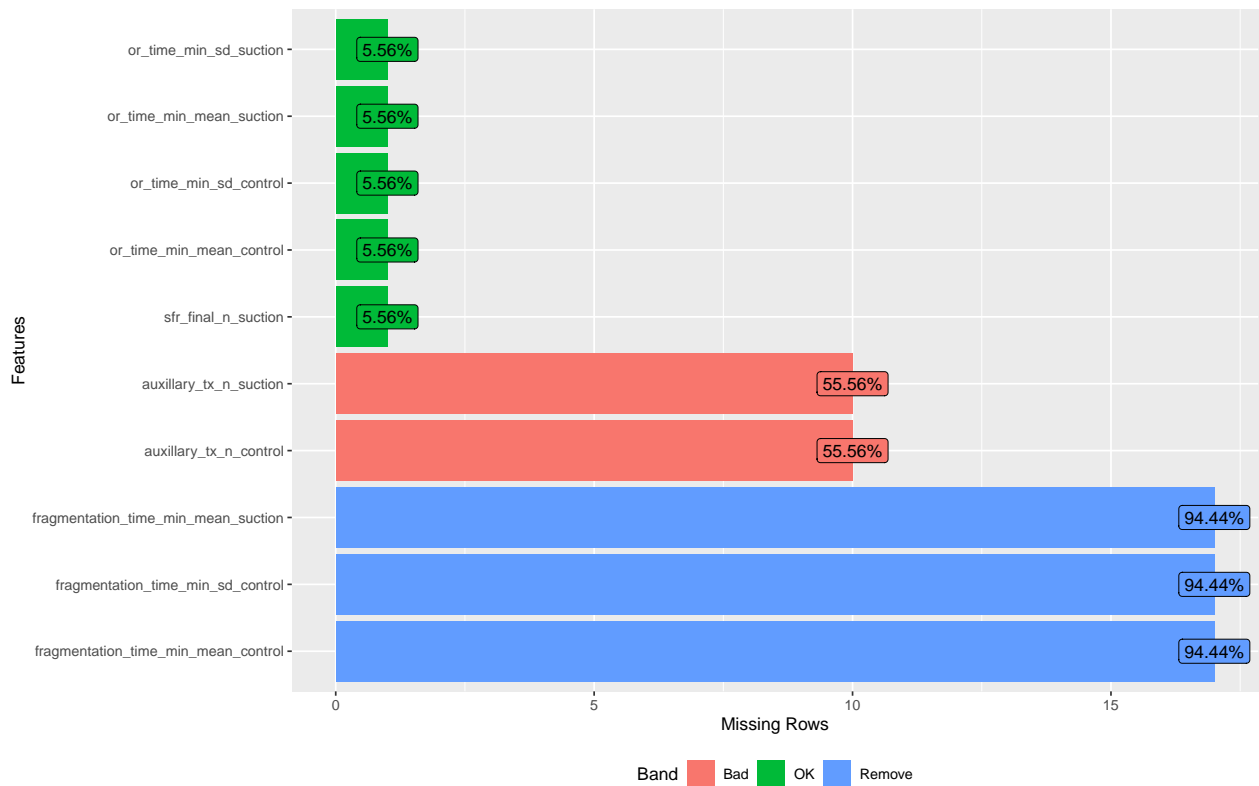



plot\_missing(suction\_data[121:130])

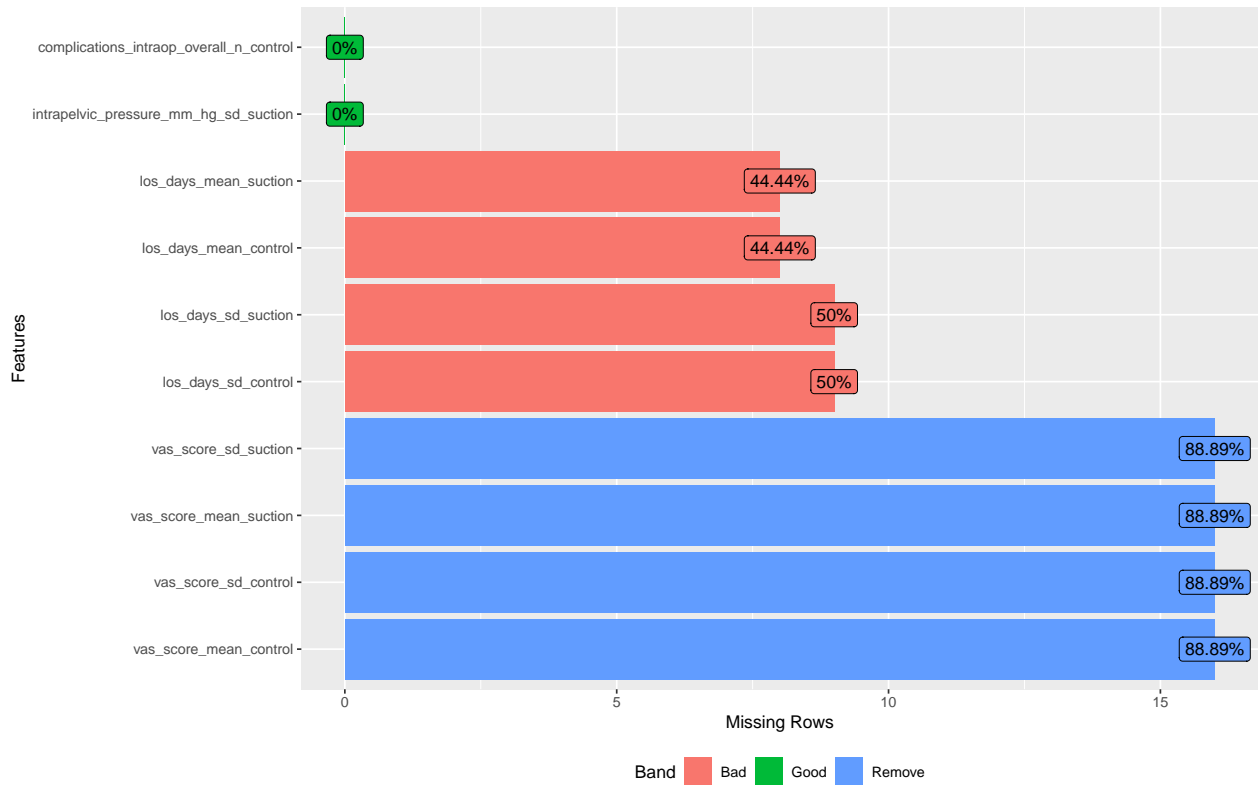

plot\_missing(suction\_data[131:140])

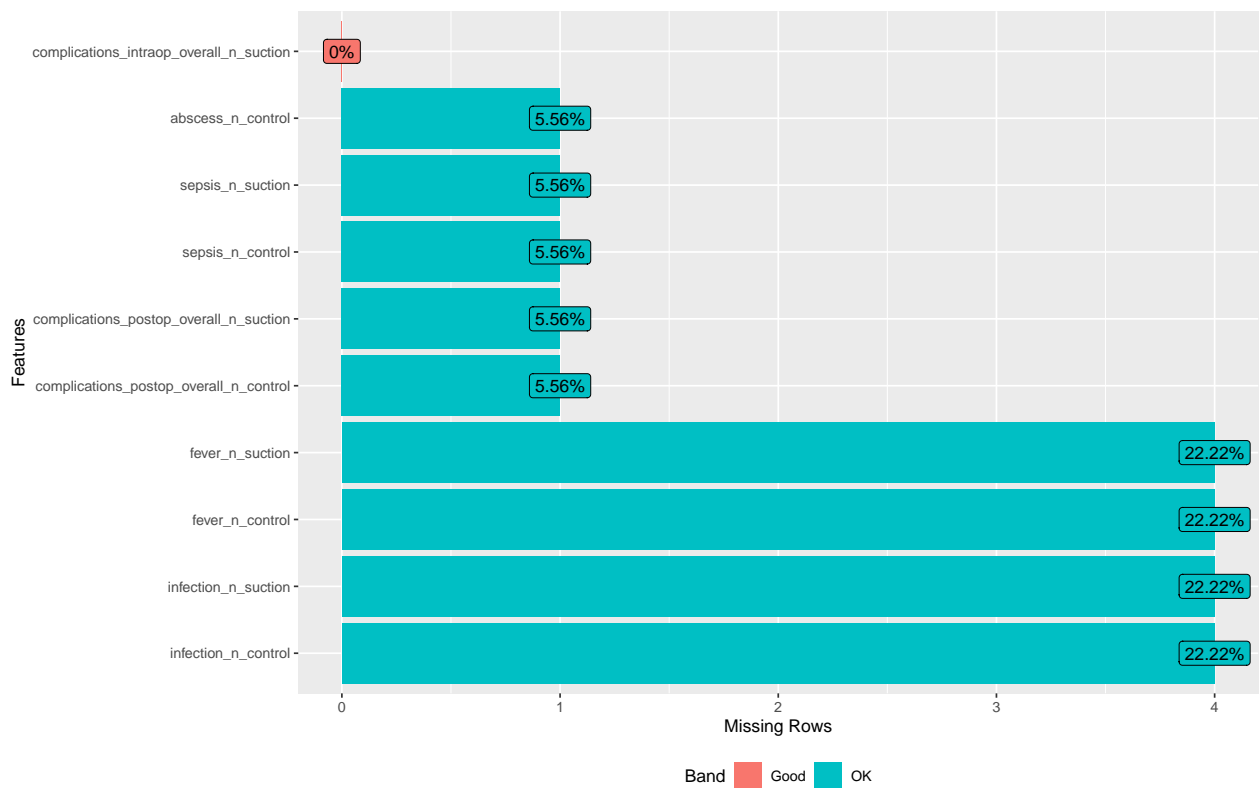

```
plot_missing(suction_data[141:150])
```

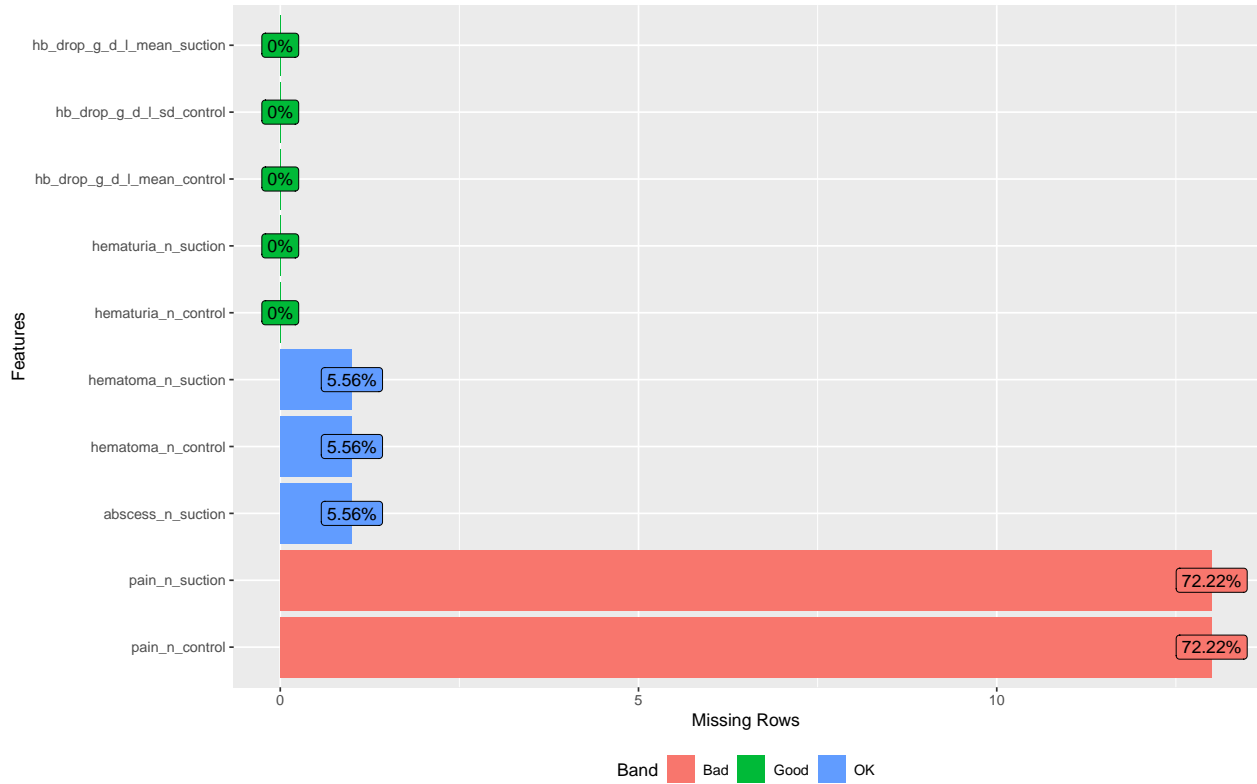

```
plot_missing(suction_data[151:160])
```

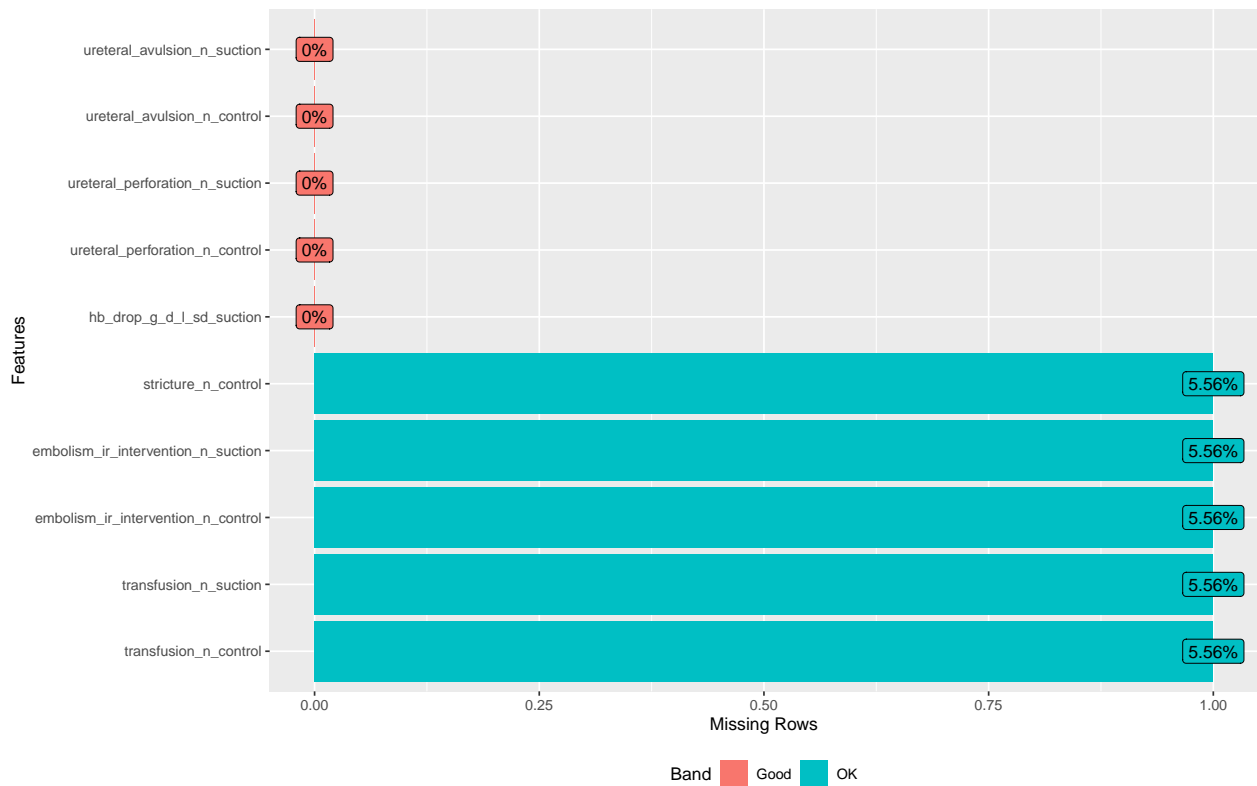

```
plot_missing(suction_data[161:170])
```

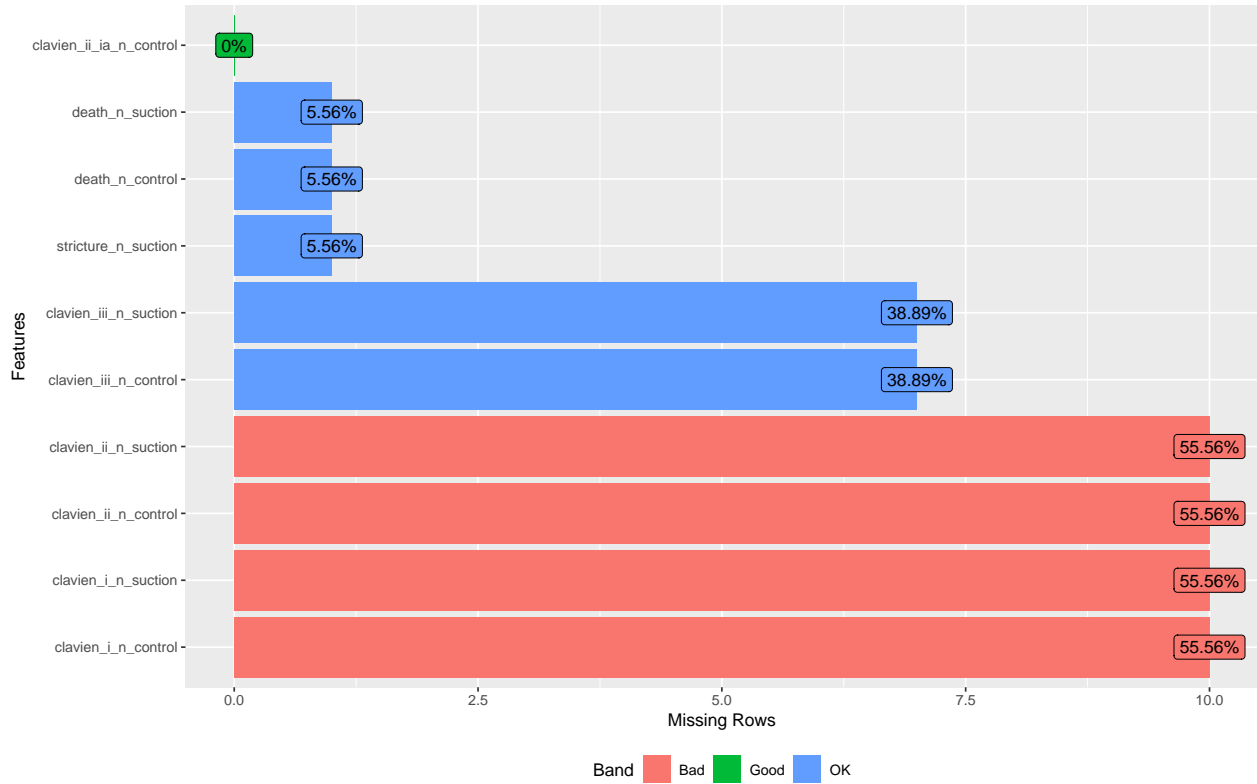

```
plot_missing(suction_data[171:182])
```

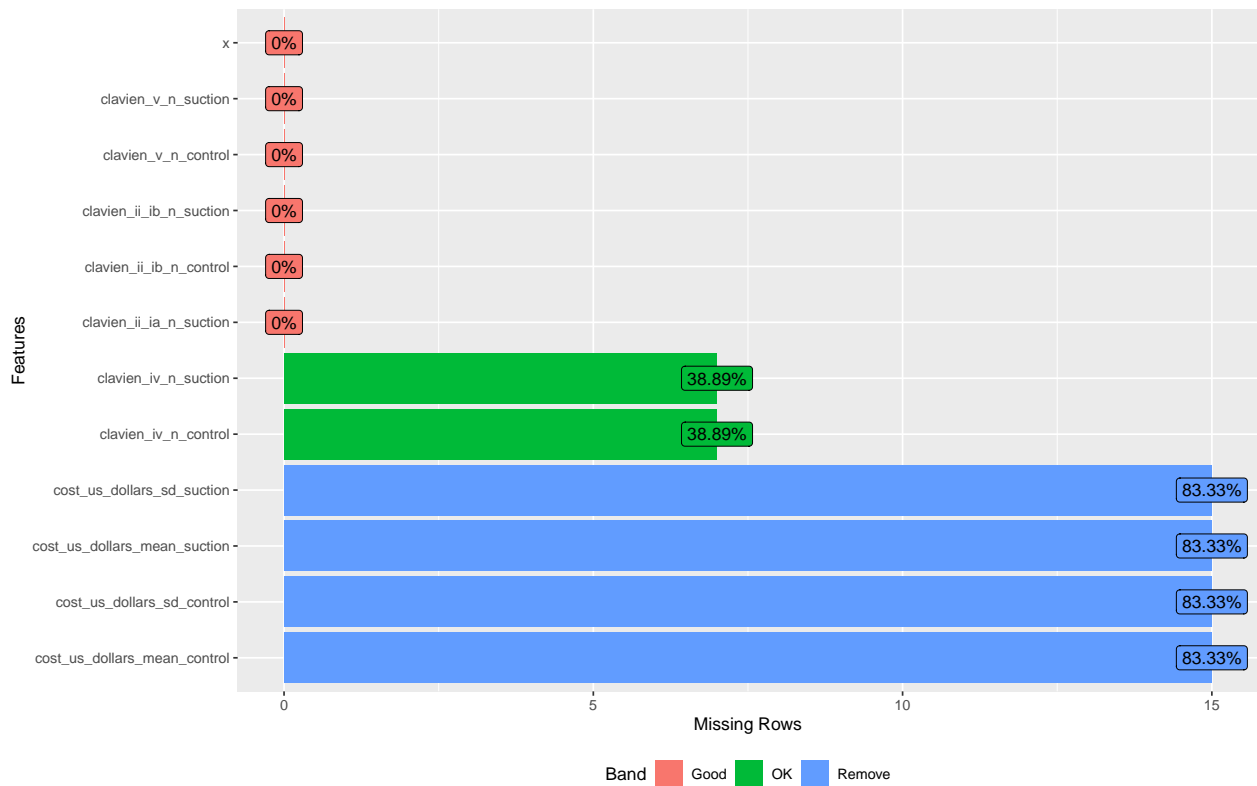

## 3 Demographic information

### 3.1 Number of Patients

```
total_n <- c(
  "Total",
  sum(suction_data$sample_size_control),
  sum(suction_data$sample_size_suction)
)

suction_data %>% subset(select = c(author_year,
  sample_size_control,
  sample_size_suction)) %>% rbind(total_n) %>% gt() %>% cols_label(
  author_year = "Study",
  sample_size_control = "Control, N",
  sample_size_suction = "Suction, N"
)
```

| Study             | Control, N | Suction, N |
|-------------------|------------|------------|
| Sur 2022          | 8          | 9          |
| Tang 2023         | 87         | 86         |
| Chen 2019         | 45         | 44         |
| Du 2019           | 60         | 62         |
| Lai 2020          | 56         | 28         |
| Zhu 2018          | 165        | 165        |
| Zhang 2021        | 50         | 56         |
| Zhang 2021        | 54         | 56         |
| Lechevallier 2003 | 14         | 11         |
| Huang 2023        | 103        | 103        |
| Wu 2022           | 82         | 76         |
| Ding 2023         | 61         | 138        |
| Zhai 2023         | 60         | 60         |
| Zhai 2023         | 60         | 60         |
| Qian 2022         | 81         | 81         |
| Zhang 2022        | 30         | 30         |
| Deng 2022         | 70         | 57         |
| AlSmadi 2019      | 60         | 43         |
| Total             | 1146       | 1165       |

## 3.2 Number of Surgeons

```
median_surgeons_n <- c(
  "Median",
  median(na.omit(suction_data$number_of_surgeons_control)),
  median(na.omit(suction_data$number_of_surgeons_suction))
)

suction_data %>% subset(select = c(author_year,
                                   number_of_surgeons_control,
                                   number_of_surgeons_suction)) %>% na.omit() %>% rbind(median_surgeons_n,
  author_year = "Study",
  number_of_surgeons_control = "Control, N",
  number_of_surgeons_suction = "Suction, N"
)
```

| Study             | Control, N | Suction, N |
|-------------------|------------|------------|
| Sur 2022          | 4          | 4          |
| Tang 2023         | 1          | 1          |
| Du 2019           | 1          | 1          |
| Zhu 2018          | 3          | 3          |
| Lechevallier 2003 | 1          | 1          |
| Huang 2023        | 1          | 1          |
| Zhai 2023         | 1          | 1          |
| Zhai 2023         | 1          | 1          |
| Median            | 1          | 1          |

### 3.3 Number of Male Patients

```
total_surgeons_n <- c(
  "Total",
  median(na.omit(suction_data$male_n_control)),
  median(na.omit(suction_data$male_n_suction))
)

suction_data %>% subset(select = c(author_year,
  male_n_control,
  male_n_suction)) %>% na.omit() %>% rbind(total_surgeons_n) %>% gt() %>%
  author_year = "Study",
  male_n_control = "Control, N",
  male_n_suction = "Suction, N"
)
```

| Study        | Control, N | Suction, N |
|--------------|------------|------------|
| Sur 2022     | 5          | 8          |
| Tang 2023    | 41         | 37         |
| Chen 2019    | 23         | 21         |
| Du 2019      | 36         | 37         |
| Lai 2020     | 26         | 16         |
| Zhu 2018     | 109        | 109        |
| Zhang 2021   | 25         | 34         |
| Zhang 2021   | 37         | 34         |
| Huang 2023   | 68         | 71         |
| Wu 2022      | 46         | 43         |
| Ding 2023    | 39         | 89         |
| Zhai 2023    | 32         | 34         |
| Zhai 2023    | 32         | 35         |
| Qian 2022    | 56         | 52         |
| Zhang 2022   | 19         | 17         |
| Deng 2022    | 47         | 32         |
| AlSmadi 2019 | 24         | 18         |
| Total        | 36         | 34         |

### 3.4 Comparisons - type of intervention

```
suction_data %>% subset(select = c(author_year,
                                  design,
                                  control_group,
                                  suction_group
                                )) %>% gt()
```

| author_year       | design        | control_group  | suction_group                                                     |
|-------------------|---------------|----------------|-------------------------------------------------------------------|
| Sur 2022          | RCT           | Flexible URS   | Flexible URS with suction                                         |
| Tang 2023         | RCT           | mini-PCNL      | Flexible URS with suction                                         |
| Chen 2019         | Retrospective | mini-PCNL      | Flexible URS with suction                                         |
| Du 2019           | RCT           | Semi-rigid URS | Semi-rigid URS with suction                                       |
| Lai 2020          | Retrospective | mini-PCNL      | Flexible URS with suction                                         |
| Zhu 2018          | Retrospective | Flexible URS   | Flexible URS with suction                                         |
| Zhang 2021        | Retrospective | Semi-rigid URS | Semi-rigid URS with suction                                       |
| Zhang 2021        | Retrospective | Flexible URS   | Flexible URS with suction                                         |
| Lechevallier 2003 | RCT           | Semi-rigid URS | Semi-rigid URS with suction                                       |
| Huang 2023        | Retrospective | Flexible URS   | Flexible URS with suction                                         |
| Wu 2022           | Retrospective | Semi-rigid URS | Semi-rigid URS with suction                                       |
| Ding 2023         | Retrospective | Flexible URS   | Flexible URS with suction                                         |
| Zhai 2023         | Retrospective | Semi-rigid URS | Semi-rigid URS with suction                                       |
| Zhai 2023         | Retrospective | Semi-rigid URS | Semi-rigid URS with suction                                       |
| Qian 2022         | Retrospective | Flexible URS   | Flexible URS with suction                                         |
| Zhang 2022        | RCT           | Flexible URS   | Semi-rigid URS with suction (combined with flexible standard URS) |
| Deng 2022         | Retrospective | mini-PCNL      | Flexible URS with suction                                         |
| AlSmadi 2019      | Retrospective | Semi-rigid URS | Semi-rigid URS with suction                                       |

### 3.5 Age

```
suction_data %>% subset(select = c(author_year,  
                                age_mean_control,  
                                age_sd_control,  
                                age_mean_suction,  
                                age_sd_suction)) %>% gt() %>% cols_merge(columns = c(age_mean_control,  
                                            age_sd_control)  
                                pattern = "{1}±{2}") %>% co.  
                                age_sd_suction)  
                                pattern = "{1}±{2}") %>% co.
```

| Study             | Control Age ± SD | Suction Age ± SD |
|-------------------|------------------|------------------|
| Sur 2022          | 37.0±NA          | 42.0±NA          |
| Tang 2023         | 51.3±8.2         | 52.7±9.3         |
| Chen 2019         | 39.4±17.9        | 45.7±11.9        |
| Du 2019           | 47.0±15.7        | 47.4±13.2        |
| Lai 2020          | 49.6±12.2        | 45.2±10.4        |
| Zhu 2018          | 51.7±15.8        | 53.9±13.4        |
| Zhang 2021        | 54.3±11.6        | 53.8±12.1        |
| Zhang 2021        | 55.2±10.2        | 53.8±12.1        |
| Lechevallier 2003 | NA±NA            | NA±NA            |
| Huang 2023        | 54.7±10.7        | 54.5±11.0        |
| Wu 2022           | 44.9±12.7        | 48.5±12.4        |
| Ding 2023         | 55.7±13.1        | 57.6±13.7        |
| Zhai 2023         | 46.2±6.9         | 45.7±6.5         |
| Zhai 2023         | 46.2±6.9         | 47.2±4.5         |
| Qian 2022         | 50.0±10.6        | 50.0±11.3        |
| Zhang 2022        | 55.7±10.8        | 53.5±12.9        |
| Deng 2022         | 47.4±7.8         | 51.9±10.9        |
| AlSmadi 2019      | 48.2±11.0        | 51.9±13.2        |



### 3.6 BMI

```
suction_data %>% subset(select = c(author_year,
                                   bmi_mean_control,
                                   bmi_sd_control,
                                   bmi_mean_suction,
                                   bmi_sd_suction)) %>% gt() %>% cols_merge(columns = c(bmi_mean_control,
                                                                                          bmi_sd_control),
                                       pattern = "{1}±{2}") %>% cols_merge(columns = c(bmi_mean_suction,
                                                                                          bmi_sd_suction),
                                       pattern = "{1}±{2}") %>% cols_merge(columns = c(bmi_mean_control,
                                                                                          bmi_sd_control),
                                       pattern = "{1}±{2}") %>% cols_merge(columns = c(bmi_mean_suction,
                                                                                          bmi_sd_suction),
                                       pattern = "{1}±{2}")
```

| Study             | Control BMI ± SD | Suction BMI ± SD |
|-------------------|------------------|------------------|
| Sur 2022          | 23.4±NA          | 22.3±NA          |
| Tang 2023         | 22.6±3.2         | 23.1±3.9         |
| Chen 2019         | 27.3±4.4         | 28.2±8.2         |
| Du 2019           | NA±NA            | NA±NA            |
| Lai 2020          | 25.3±4.1         | 25.0±3.5         |
| Zhu 2018          | 23.1±3.4         | 22.9±2.6         |
| Zhang 2021        | 21.8±3.4         | 20.8±3.4         |
| Zhang 2021        | 21.9±3.5         | 20.8±3.4         |
| Lechevallier 2003 | NA±NA            | NA±NA            |
| Huang 2023        | 26.5±4.9         | 26.3±4.2         |
| Wu 2022           | 24.6±2.8         | 23.9±2.0         |
| Ding 2023         | 24.0±2.6         | 24.6±3.2         |
| Zhai 2023         | 26.2±4.1         | 25.0±3.4         |
| Zhai 2023         | 26.2±4.1         | 24.9±3.1         |
| Qian 2022         | 24.1±3.4         | 24.0±3.0         |
| Zhang 2022        | 25.5±2.9         | 25.2±3.2         |
| Deng 2022         | 19.8±5.7         | 20.3±4.4         |
| AlSmadi 2019      | 24.0±1.7         | 22.8±1.5         |

### 3.7 HU

```
suction_data %>% subset(select = c(author_year,
                                  hu_mean_control,
                                  hu_sd_control,
                                  hu_mean_suction,
                                  hu_sd_suction)) %>% gt() %>% cols_merge(columns = c(hu_mean_control,
                                                                                        hu_sd_control),
                                  pattern = "{1}±{2}") %>% cols_merge(columns = c(hu_mean_suction,
                                                                                        hu_sd_suction),
                                  pattern = "{1}±{2}") %>% cols
```

| Study             | Control HU ± SD | Suction HU ± SD |
|-------------------|-----------------|-----------------|
| Sur 2022          | 926.0±NA        | 786.0±NA        |
| Tang 2023         | NA±NA           | NA±NA           |
| Chen 2019         | NA±NA           | NA±NA           |
| Du 2019           | 984.5±226.8     | 1022.8±215.3    |
| Lai 2020          | 845.2±240.2     | 894.3±232.2     |
| Zhu 2018          | 1023.0±175.0    | 1049.0±196.0    |
| Zhang 2021        | 665.0±309.6     | 708.6±343.7     |
| Zhang 2021        | 684.2±376.3     | 708.6±343.7     |
| Lechevallier 2003 | NA±NA           | NA±NA           |
| Huang 2023        | NA±NA           | NA±NA           |
| Wu 2022           | 916.4±80.7      | 937.7±85.0      |
| Ding 2023         | 715.3±340.8     | 751.6±429.3     |
| Zhai 2023         | 912.3±52.9      | 906.5±63.5      |
| Zhai 2023         | 912.3±52.9      | 897.1±94.2      |
| Qian 2022         | NA±NA           | NA±NA           |
| Zhang 2022        | NA±NA           | NA±NA           |
| Deng 2022         | NA±NA           | NA±NA           |
| AlSmadi 2019      | 776.5±120.1     | 895.6±70.4      |

## 3.8 Size Metrics

### 3.8.1 Size (mm) - missing data removed

```
suction_data %>% subset(select = c(author_year,  
  stone_size_mm_mean_control,  
  stone_size_mm_sd_control,  
  stone_size_mm_mean_suction,  
  stone_size_mm_sd_suction)) %>% drop_na(stone_size_mm_mean_control) %>%  
  summarise(control_size = stone_size_mm_mean_control, control_sd = stone_size_mm_sd_control,  
            suction_size = stone_size_mm_mean_suction, suction_sd = stone_size_mm_sd_suction)  
#> # A tibble: 11 x 4  
#>   author_year control_size control_sd suction_size suction_sd  
#>   <dbl> <dbl> <dbl> <dbl> <dbl>  
#> 1 2023 15.0 5.0 16.0 4.0  
#> 2 2019 21.4 3.6 21.9 4.9  
#> 3 2020 38.2 5.4 35.3 6.3  
#> 4 2018 17.4 4.7 18.2 5.2  
#> 5 2021 12.5 4.9 13.9 4.7  
#> 6 2021 12.7 5.5 13.9 4.7  
#> 7 2023 17.0 5.0 17.0 6.0  
#> 8 2023 13.4 5.2 13.0 6.9  
#> 9 2022 20.0 4.5 19.7 4.5  
#> 10 2022 18.5 5.6 18.2 5.3  
#> 11 2022 24.9 7.9 23.1 6.5  
#> 12 2019 14.9 1.8 12.7 1.2
```

| Study        | Control Size (mm) $\pm$ SD | Suction Size (mm) $\pm$ SD |
|--------------|----------------------------|----------------------------|
| Tang 2023    | 15.0 $\pm$ 5.0             | 16.0 $\pm$ 4.0             |
| Du 2019      | 21.4 $\pm$ 3.6             | 21.9 $\pm$ 4.9             |
| Lai 2020     | 38.2 $\pm$ 5.4             | 35.3 $\pm$ 6.3             |
| Zhu 2018     | 17.4 $\pm$ 4.7             | 18.2 $\pm$ 5.2             |
| Zhang 2021   | 12.5 $\pm$ 4.9             | 13.9 $\pm$ 4.7             |
| Zhang 2021   | 12.7 $\pm$ 5.5             | 13.9 $\pm$ 4.7             |
| Huang 2023   | 17.0 $\pm$ 5.0             | 17.0 $\pm$ 6.0             |
| Ding 2023    | 13.4 $\pm$ 5.2             | 13.0 $\pm$ 6.9             |
| Qian 2022    | 20.0 $\pm$ 4.5             | 19.7 $\pm$ 4.5             |
| Zhang 2022   | 18.5 $\pm$ 5.6             | 18.2 $\pm$ 5.3             |
| Deng 2022    | 24.9 $\pm$ 7.9             | 23.1 $\pm$ 6.5             |
| AlSmadi 2019 | 14.9 $\pm$ 1.8             | 12.7 $\pm$ 1.2             |

### 3.8.2 Area (mm<sup>2</sup>) - missing data removed

```
suction_data %>% subset(select = c(author_year,  
                                stone_surface_mm2_mean_control,  
                                stone_surface_mm2_sd_control,  
                                stone_surface_mm2_mean_suction,  
                                stone_surface_mm2_sd_suction)) %>% drop_na(stone_surface_mm2_mean_co  
                                stone_surface_mm  
                                pattern = "{1}±{2}") %>% co  
                                stone_surface_mm  
                                pattern = "{1}±{2}") %>% co
```

| Study     | Control Area (mm <sup>2</sup> ) ± SD | Suction Area (mm <sup>2</sup> ) ± SD |
|-----------|--------------------------------------|--------------------------------------|
| Lai 2020  | 729.0±83.7                           | 676.1±42.2                           |
| Wu 2022   | 157.0±34.6                           | 165.3±33.4                           |
| Zhai 2023 | 131.8±25.1                           | 136.5±26.6                           |
| Zhai 2023 | 131.8±25.1                           | 135.9±24.8                           |

### 3.8.3 Volume (mm<sup>3</sup>) - missing data removed

```
suction_data %>% subset(select = c(author_year,  
                                stone_burden_mm3_mean_control,  
                                stone_burden_mm3_sd_control,  
                                stone_burden_mm3_mean_suction,  
                                stone_burden_mm3_sd_suction)) %>% drop_na(stone_burden_mm3_mean_cont:  
                                stone_burden_mm3_sd_control,  
                                stone_burden_mm3_mean_suction,  
                                stone_burden_mm3_sd_suction)  
                                pattern = "{1}±{2}") %>% co  
                                stone_burden_mm3_mean_suction,  
                                stone_burden_mm3_sd_suction)  
                                pattern = "{1}±{2}") %>% co
```

| Study    | Control Volume (mm <sup>3</sup> ) ± SD | Suction Volume (mm <sup>3</sup> ) ± SD |
|----------|----------------------------------------|----------------------------------------|
| Sur 2022 | 210±NA                                 | 267±NA                                 |

## 3.9 Stone Location

### 3.9.1 Distal Ureter

```
total_distal_n <- c(
  "Total",
  sum(na.omit(suction_data$distal_ureter_n_control)),
  sum(na.omit(suction_data$distal_ureter_n_suction))
)

suction_data %>% subset(select = c(author_year,
  distal_ureter_n_control,
  distal_ureter_n_suction)) %>% na.omit() %>% rbind(total_distal_n %>%
  author_year = "Study",
  distal_ureter_n_control = "Control, N",
  distal_ureter_n_suction = "Suction, N"
)
```

| Study        | Control, N | Suction, N |
|--------------|------------|------------|
| Sur 2022     | 0          | 0          |
| Tang 2023    | 0          | 0          |
| Chen 2019    | 0          | 0          |
| Du 2019      | 27         | 26         |
| Lai 2020     | 0          | 0          |
| Zhang 2021   | 0          | 0          |
| Zhang 2021   | 0          | 0          |
| Huang 2023   | 0          | 0          |
| Wu 2022      | 0          | 0          |
| Ding 2023    | 0          | 0          |
| Zhai 2023    | 30         | 30         |
| Zhai 2023    | 30         | 20         |
| Qian 2022    | 0          | 0          |
| Zhang 2022   | 0          | 0          |
| Deng 2022    | 0          | 0          |
| AlSmadi 2019 | 0          | 0          |
| Total        | 87         | 76         |

### 3.9.2 Mid Ureter

```
total_mid_n <- c(
  "Total",
  sum(na.omit(suction_data$mid_ureter_n_control)),
  sum(na.omit(suction_data$mid_ureter_n_suction))
)

suction_data %>% subset(select = c(author_year,
  mid_ureter_n_control,
  mid_ureter_n_suction)) %>% na.omit() %>% rbind(total_mid_n) %>% gt(
  author_year = "Study",
  mid_ureter_n_control = "Control, N",
  mid_ureter_n_suction = "Suction, N"
)
```

| Study        | Control, N | Suction, N |
|--------------|------------|------------|
| Sur 2022     | 0          | 0          |
| Tang 2023    | 0          | 0          |
| Chen 2019    | 0          | 0          |
| Du 2019      | 13         | 15         |
| Lai 2020     | 0          | 0          |
| Zhang 2021   | 0          | 0          |
| Zhang 2021   | 0          | 0          |
| Huang 2023   | 0          | 0          |
| Wu 2022      | 0          | 0          |
| Ding 2023    | 0          | 0          |
| Zhai 2023    | 17         | 18         |
| Zhai 2023    | 17         | 28         |
| Qian 2022    | 0          | 0          |
| Zhang 2022   | 0          | 0          |
| Deng 2022    | 0          | 0          |
| AlSmadi 2019 | 0          | 0          |
| Total        | 47         | 61         |

### 3.9.3 Upper Ureter

```
total_upper_n <- c(
  "Total",
  sum(na.omit(suction_data$upper_ureter_n_control)),
  sum(na.omit(suction_data$upper_ureter_n_suction))
)

suction_data %>% subset(select = c(author_year,
  upper_ureter_n_control,
  upper_ureter_n_suction)) %>% na.omit() %>% rbind(total_upper_n) %>%
  author_year = "Study",
  upper_ureter_n_control = "Control, N",
  upper_ureter_n_suction = "Suction, N"
)
```

| Study        | Control, N | Suction, N |
|--------------|------------|------------|
| Sur 2022     | 0          | 0          |
| Tang 2023    | 87         | 86         |
| Chen 2019    | 0          | 0          |
| Du 2019      | 20         | 21         |
| Lai 2020     | 0          | 0          |
| Zhang 2021   | 50         | 56         |
| Zhang 2021   | 54         | 56         |
| Wu 2022      | 82         | 76         |
| Ding 2023    | 13         | 26         |
| Zhai 2023    | 13         | 12         |
| Zhai 2023    | 13         | 12         |
| Qian 2022    | 0          | 0          |
| Zhang 2022   | 0          | 0          |
| Deng 2022    | 0          | 0          |
| AlSmadi 2019 | 60         | 43         |
| Total        | 392        | 388        |



### 3.9.4 Renal Pelvis

```
total_renal_pelvis_n <- c(
  "Total",
  sum(na.omit(suction_data$renal_pelvis_n_control)),
  sum(na.omit(suction_data$renal_pelvis_n_suction))
)

suction_data %>% subset(select = c(author_year,
  renal_pelvis_n_control,
  renal_pelvis_n_suction)) %>% na.omit() %>% rbind(total_renal_pelvis_n,
  author_year = "Study",
  renal_pelvis_n_control = "Control, N",
  renal_pelvis_n_suction = "Suction, N"
)
```

| Study        | Control, N | Suction, N |
|--------------|------------|------------|
| Tang 2023    | 0          | 0          |
| Chen 2019    | 0          | 0          |
| Du 2019      | 0          | 0          |
| Lai 2020     | 56         | 28         |
| Zhu 2018     | 23         | 29         |
| Zhang 2021   | 0          | 0          |
| Zhang 2021   | 0          | 0          |
| Wu 2022      | 0          | 0          |
| Ding 2023    | 35         | 98         |
| Zhai 2023    | 0          | 0          |
| Zhai 2023    | 0          | 0          |
| Qian 2022    | 0          | 0          |
| Deng 2022    | 5          | 6          |
| AlSmadi 2019 | 0          | 0          |
| Total        | 119        | 161        |

### 3.9.5 Lower Calyx

```
total_lower_calyx_n <- c(
  "Total",
  sum(na.omit(suction_data$lower_calyx_n_control)),
  sum(na.omit(suction_data$lower_calyx_n_suction))
)

suction_data %>% subset(select = c(author_year,
  lower_calyx_n_control,
  lower_calyx_n_suction)) %>% na.omit() %>% rbind(total_lower_calyx_n)
  author_year = "Study",
  lower_calyx_n_control = "Control, N",
  lower_calyx_n_suction = "Suction, N"
)
```

| Study        | Control, N | Suction, N |
|--------------|------------|------------|
| Sur 2022     | 5          | 7          |
| Tang 2023    | 0          | 0          |
| Chen 2019    | 13         | 11         |
| Du 2019      | 0          | 0          |
| Lai 2020     | 22         | 11         |
| Zhu 2018     | 42         | 40         |
| Zhang 2021   | 0          | 0          |
| Zhang 2021   | 0          | 0          |
| Wu 2022      | 0          | 0          |
| Ding 2023    | 29         | 64         |
| Zhai 2023    | 0          | 0          |
| Zhai 2023    | 0          | 0          |
| Qian 2022    | 25         | 34         |
| Deng 2022    | 5          | 3          |
| AlSmadi 2019 | 0          | 0          |
| Total        | 141        | 170        |

### 3.9.6 middle Calyx

```
total_middle_calyx_n <- c(
  "Total",
  sum(na.omit(suction_data$middle_calyx_n_control)),
  sum(na.omit(suction_data$middle_calyx_n_suction))
)

suction_data %>% subset(select = c(author_year,
  middle_calyx_n_control,
  middle_calyx_n_suction)) %>% na.omit() %>% rbind(total_middle_calyx_n,
  author_year = "Study",
  middle_calyx_n_control = "Control, N",
  middle_calyx_n_suction = "Suction, N"
)
```

| Study        | Control, N | Suction, N |
|--------------|------------|------------|
| Tang 2023    | 0          | 0          |
| Chen 2019    | 16         | 18         |
| Du 2019      | 0          | 0          |
| Lai 2020     | 28         | 15         |
| Zhu 2018     | 35         | 27         |
| Zhang 2021   | 0          | 0          |
| Zhang 2021   | 0          | 0          |
| Wu 2022      | 0          | 0          |
| Ding 2023    | 5          | 11         |
| Zhai 2023    | 0          | 0          |
| Zhai 2023    | 0          | 0          |
| Deng 2022    | 7          | 4          |
| AlSmadi 2019 | 0          | 0          |
| Total        | 91         | 75         |

### 3.9.7 Upper Calyx

```
total_upper_calyx_n <- c(
  "Total",
  sum(na.omit(suction_data$upper_calyx_n_control)),
  sum(na.omit(suction_data$upper_calyx_n_suction))
)

suction_data %>% subset(select = c(author_year,
                                   upper_calyx_n_control,
                                   upper_calyx_n_suction)) %>% na.omit() %>% rbind(total_upper_calyx_n)
  author_year = "Study",
  upper_calyx_n_control = "Control, N",
  upper_calyx_n_suction = "Suction, N"
)
```

| Study        | Control, N | Suction, N |
|--------------|------------|------------|
| Tang 2023    | 0          | 0          |
| Chen 2019    | 16         | 17         |
| Du 2019      | 0          | 0          |
| Lai 2020     | 22         | 13         |
| Zhu 2018     | 18         | 14         |
| Zhang 2021   | 0          | 0          |
| Zhang 2021   | 0          | 0          |
| Wu 2022      | 0          | 0          |
| Ding 2023    | 2          | 3          |
| Zhai 2023    | 0          | 0          |
| Zhai 2023    | 0          | 0          |
| Deng 2022    | 14         | 15         |
| AlSmadi 2019 | 0          | 0          |
| Total        | 72         | 62         |

## 4 Overall Meta-Analysis Outcomes

### 4.1 Immediate SFR

#### 4.1.1 Meta-analysis

```
immediate_sfr_metabin <- metabin(data = suction_data,
                                event.c = sfr_immediate_n_control,
                                n.c = sample_size_control,
                                event.e = sfr_immediate_n_suction,
                                n.e = sample_size_suction,
                                studlab = author_year)

immediate_sfr_metabin

## Number of studies: k = 9
## Number of observations: o = 2311
## Number of events: e = 979
##
##              RR           95%-CI    z p-value
## Common effect model  1.1581 [1.0834; 1.2380] 4.31 < 0.0001
## Random effects model 1.1478 [0.9854; 1.3370] 1.77  0.0765
##
## Quantifying heterogeneity:
## tau^2 = 0.0365 [0.0088; 0.2318]; tau = 0.1910 [0.0939; 0.4814]
## I^2 = 74.6% [50.9%; 86.9%]; H = 1.99 [1.43; 2.76]
##
## Test of heterogeneity:
##      Q d.f. p-value
## 31.55  8 0.0001
##
## Details on meta-analytical method:
## - Mantel-Haenszel method
## - Inverse variance method
## - Restricted maximum-likelihood estimator for tau^2
## - Q-Profile method for confidence interval of tau^2 and tau
```

### 4.1.2 Forest plot

```
forest(immediate_sfr_metabin,
       sortvar = TE)
```

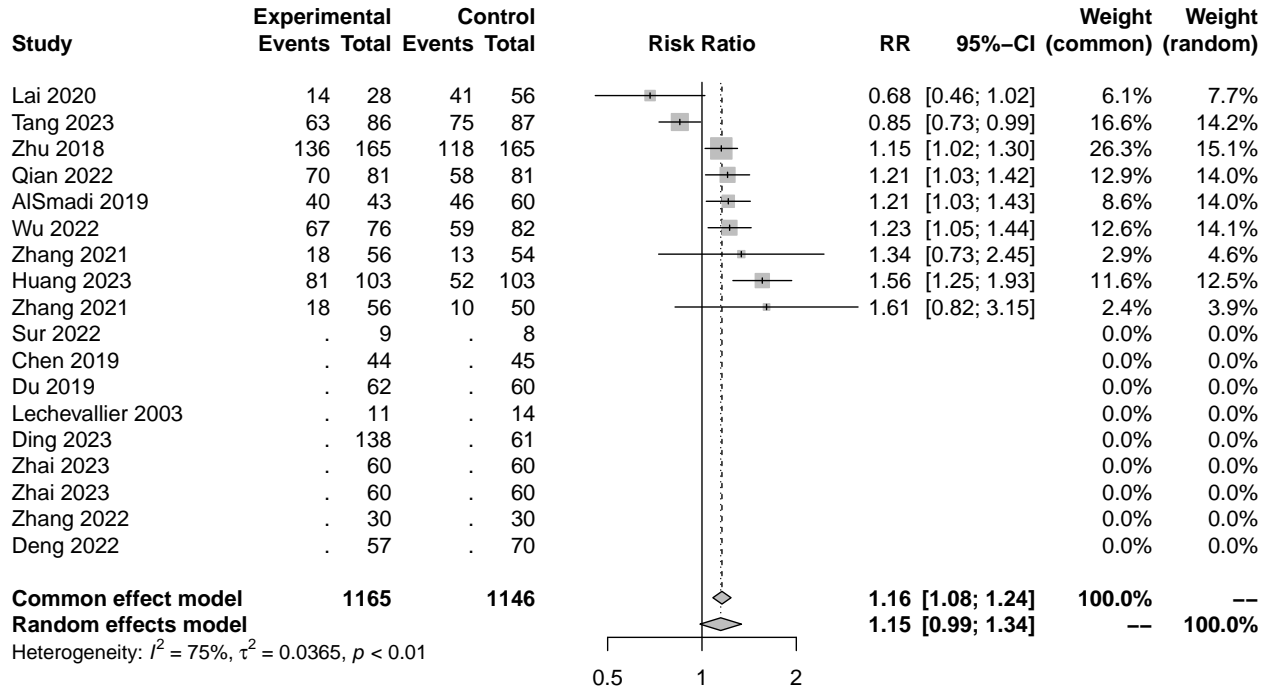

### 4.1.3 Trim and Fill

```
trimfill(immediate_sfr_metabin)
```

```
## Warning in trimfill.meta(immediate_sfr_metabin): 9 observation(s) dropped due
## to missing values

## Number of studies: k = 11 (with 2 added studies)
## Number of observations: o = 1744
## Number of events: e = 1140
##
##                      RR          95%-CI    z p-value
## Random effects model 1.0855 [0.9289; 1.2685] 1.03  0.3019
##
## Quantifying heterogeneity:
## tau^2 = 0.0471 [0.0138; 0.2196]; tau = 0.2170 [0.1173; 0.4686]
## I^2 = 76.9% [58.8%; 87.1%]; H = 2.08 [1.56; 2.78]
##
## Test of heterogeneity:
##      Q d.f.  p-value
## 43.33  10 < 0.0001
##
## Details on meta-analytical method:
## - Inverse variance method
## - Restricted maximum-likelihood estimator for tau^2
## - Q-Profile method for confidence interval of tau^2 and tau
## - Trim-and-fill method to adjust for funnel plot asymmetry (L-estimator)
```

```
forest(trimfill(immediate_sfr_metabin),
        sortvar = TE)
```

```
## Warning in trimfill.meta(immediate_sfr_metabin): 9 observation(s) dropped due
## to missing values
```

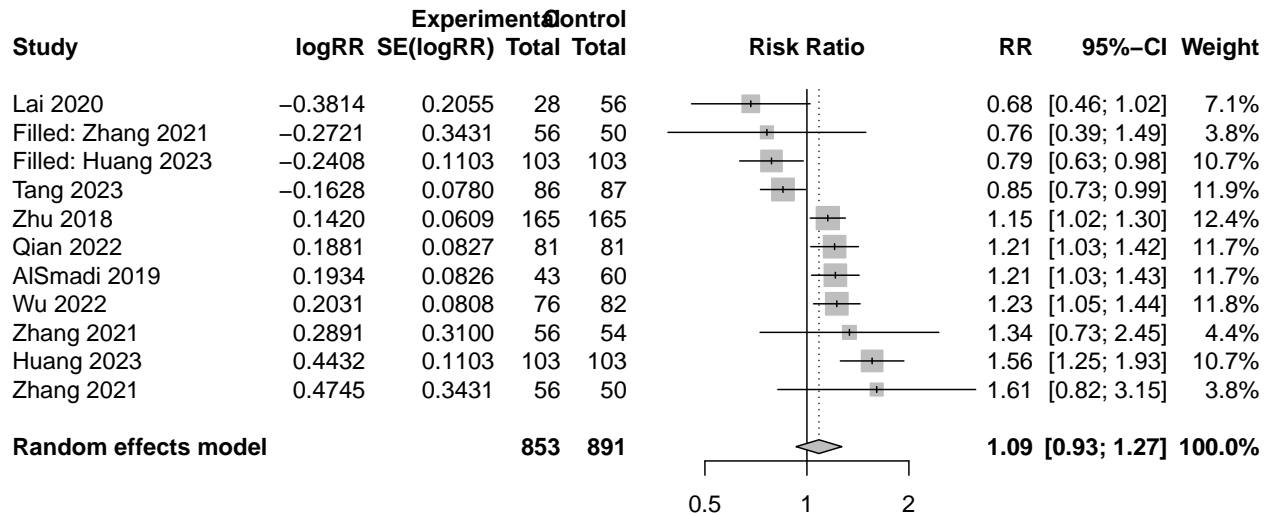

Heterogeneity:  $I^2 = 77\%$ ,  $\tau^2 = 0.0471$ ,  $p < 0.01$

#### 4.1.4 Funnel plot

```
funnel(trimfill(immediate_sfr_metabin))
```

```
## Warning in trimfill.meta(immediate_sfr_metabin): 9 observation(s) dropped due  
## to missing values
```

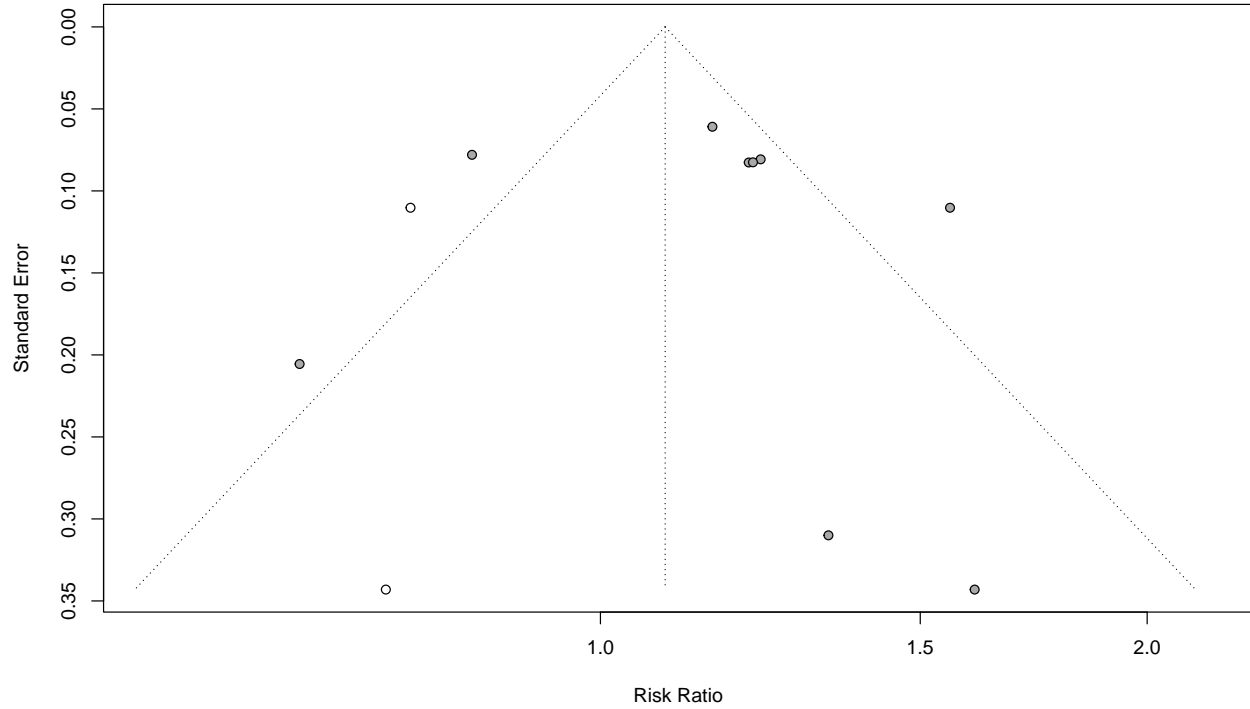



#### 4.1.5 Baujat

```
baujat(immediate_sfr_metabin, pos = 1)
```

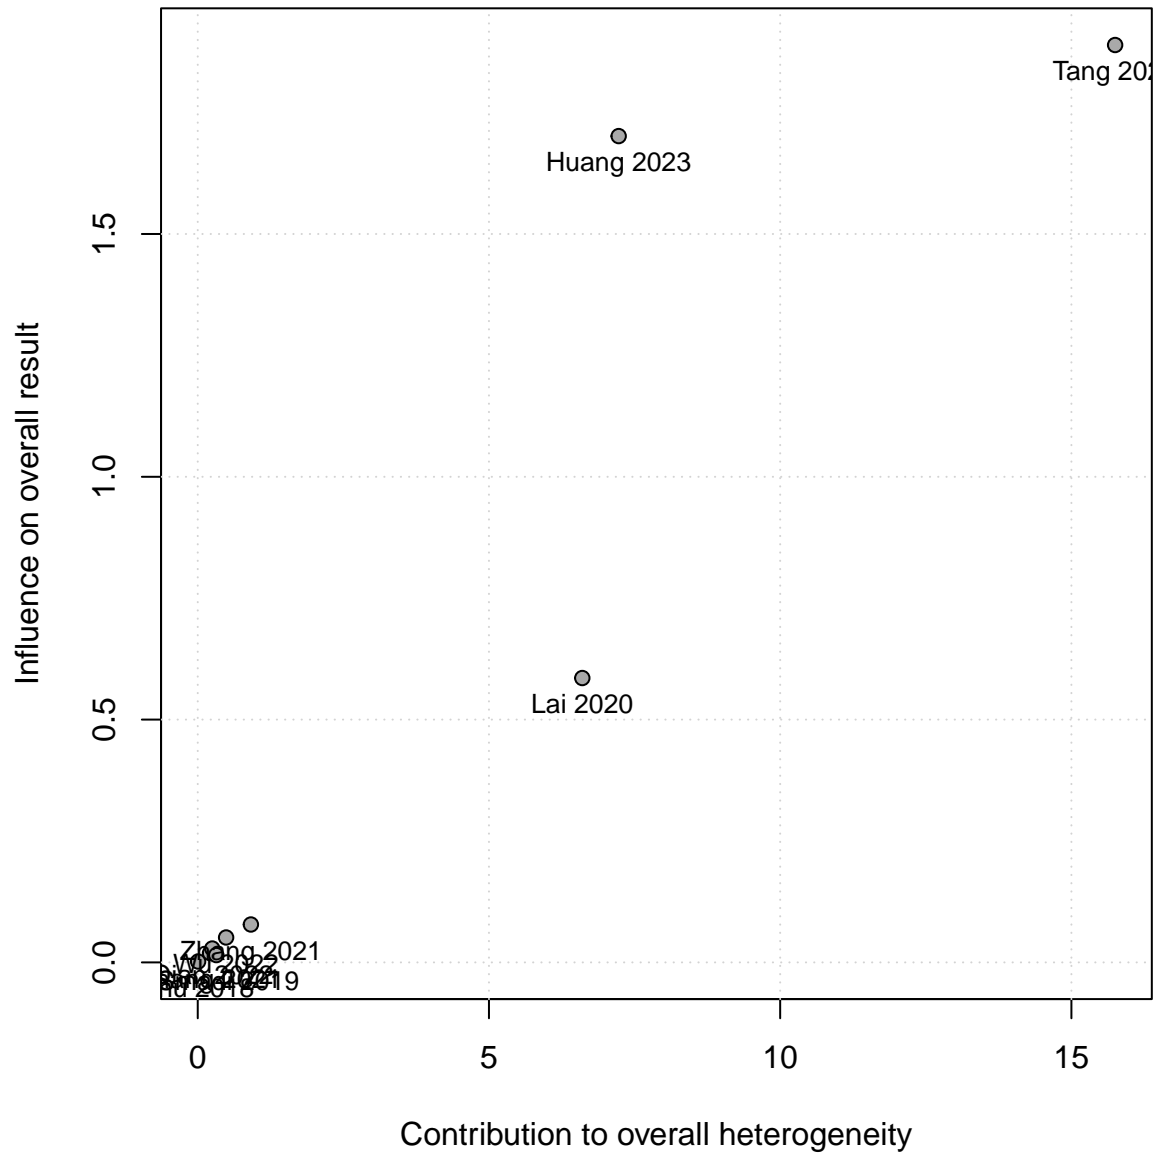

#### 4.1.6 Leave one out

```
metainf(immediate_sfr_metabin)
```

```
## Influential analysis (common effect model)
##
##
##          RR          95%-CI  p-value  tau^2    tau
## Omitting Sur 2022      1.1581 [1.0834; 1.2380] < 0.0001  0.0365  0.1910
## Omitting Tang 2023     1.2195 [1.1329; 1.3128] < 0.0001  0.0076  0.0873
## Omitting Chen 2019     1.1581 [1.0834; 1.2380] < 0.0001  0.0365  0.1910
## Omitting Du 2019       1.1581 [1.0834; 1.2380] < 0.0001  0.0365  0.1910
## Omitting Lai 2020      1.1889 [1.1116; 1.2716] < 0.0001  0.0258  0.1607
## Omitting Zhu 2018      1.1601 [1.0710; 1.2565]  0.0003  0.0482  0.2196
## Omitting Zhang 2021    1.1473 [1.0741; 1.2254] < 0.0001  0.0376  0.1938
## Omitting Zhang 2021    1.1527 [1.0791; 1.2313] < 0.0001  0.0396  0.1990
## Omitting Lechevallier 2003 1.1581 [1.0834; 1.2380] < 0.0001  0.0365  0.1910
## Omitting Huang 2023    1.1057 [1.0315; 1.1853]  0.0046  0.0246  0.1568
## Omitting Wu 2022       1.1484 [1.0676; 1.2353]  0.0002  0.0464  0.2153
## Omitting Ding 2023     1.1581 [1.0834; 1.2380] < 0.0001  0.0365  0.1910
## Omitting Zhai 2023     1.1581 [1.0834; 1.2380] < 0.0001  0.0365  0.1910
## Omitting Zhai 2023     1.1581 [1.0834; 1.2380] < 0.0001  0.0365  0.1910
## Omitting Qian 2022     1.1508 [1.0700; 1.2377]  0.0002  0.0468  0.2164
## Omitting Zhang 2022    1.1581 [1.0834; 1.2380] < 0.0001  0.0365  0.1910
## Omitting Deng 2022     1.1581 [1.0834; 1.2380] < 0.0001  0.0365  0.1910
## Omitting AlSmadi 2019  1.1529 [1.0734; 1.2383] < 0.0001  0.0467  0.2160
##
## Pooled estimate      1.1581 [1.0834; 1.2380] < 0.0001  0.0365  0.1910
##
##          I^2
## Omitting Sur 2022      74.6%
## Omitting Tang 2023     51.5%
## Omitting Chen 2019     74.6%
## Omitting Du 2019       74.6%
## Omitting Lai 2020      72.2%
## Omitting Zhu 2018      77.8%
## Omitting Zhang 2021    77.1%
## Omitting Zhang 2021    77.6%
## Omitting Lechevallier 2003 74.6%
## Omitting Huang 2023    69.4%
## Omitting Wu 2022       77.2%
## Omitting Ding 2023     74.6%
## Omitting Zhai 2023     74.6%
## Omitting Zhai 2023     74.6%
## Omitting Qian 2022     77.4%
## Omitting Zhang 2022    74.6%
## Omitting Deng 2022     74.6%
## Omitting AlSmadi 2019  77.4%
##
## Pooled estimate      74.6%
##
## Details on meta-analytical method:
## - Mantel-Haenszel method
## - Restricted maximum-likelihood estimator for tau^2
```

## 4.2 Final SFR

### 4.2.1 Meta-analysis

```
sfr_metabin <- metabin(data = suction_data,
                      event.c = sfr_final_n_control,
                      n.c = sample_size_control,
                      event.e = sfr_final_n_suction,
                      n.e = sample_size_suction,
                      studlab = author_year)

sfr_metabin

## Number of studies: k = 17
## Number of observations: o = 2311
## Number of events: e = 2014
##
##              RR          95%-CI    z  p-value
## Common effect model  1.1295 [1.0935; 1.1666] 7.38 < 0.0001
## Random effects model  1.1185 [1.0547; 1.1862] 3.74  0.0002
##
## Quantifying heterogeneity:
## tau^2 = 0.0102 [0.0036; 0.0310]; tau = 0.1011 [0.0597; 0.1760]
## I^2 = 71.3% [53.1%; 82.4%]; H = 1.87 [1.46; 2.38]
##
## Test of heterogeneity:
##      Q d.f.  p-value
## 55.71  16 < 0.0001
##
## Details on meta-analytical method:
## - Mantel-Haenszel method
## - Inverse variance method
## - Restricted maximum-likelihood estimator for tau^2
## - Q-Profile method for confidence interval of tau^2 and tau
## - Continuity correction of 0.5 in studies with zero cell frequencies
```

## 4.2.2 Forest plot

```
forest(sfr_metabin,
       sortvar = TE)
```

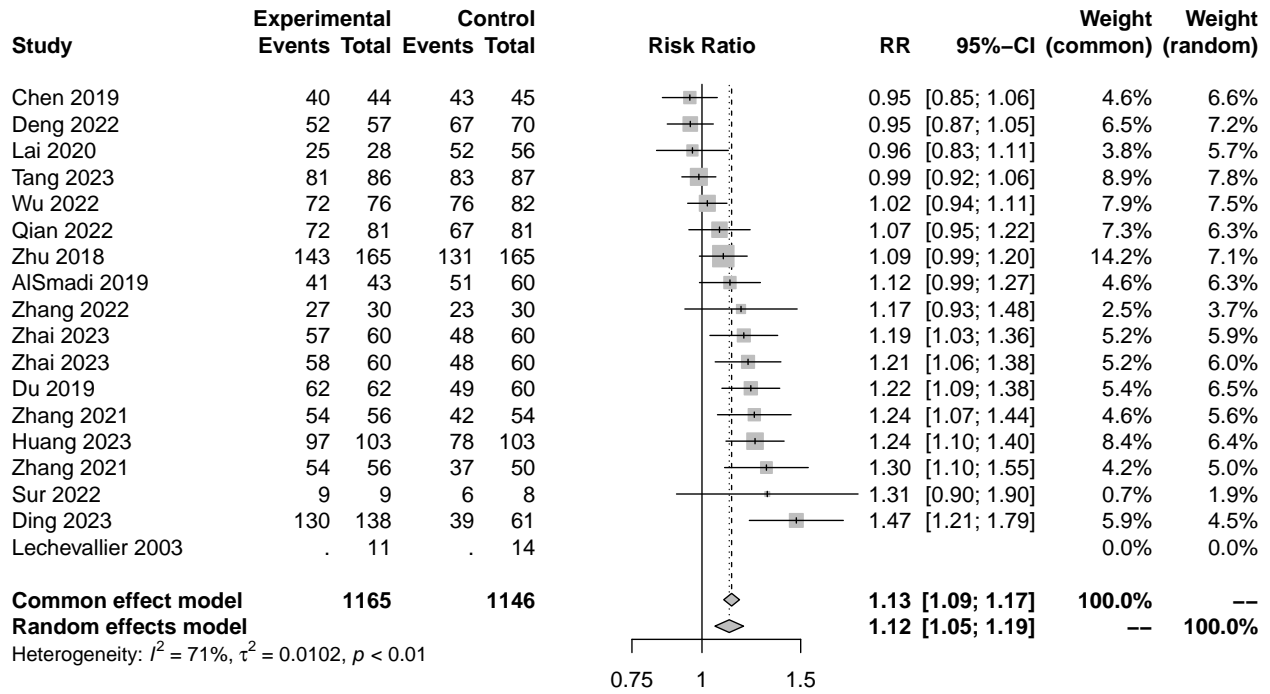

### 4.2.3 Trim and Fill

```
trimfill(sfr_metabin)
```

```
## Warning in trimfill.meta(sfr_metabin): 1 observation(s) dropped due to missing
## values
```

```
## Number of studies: k = 23 (with 6 added studies)
```

```
## Number of observations: o = 3046
```

```
## Number of events: e = 2671
```

```
##
```

```
##              RR          95%-CI    z p-value
```

```
## Random effects model 1.0468 [0.9768; 1.1219] 1.29 0.1955
```

```
##
```

```
## Quantifying heterogeneity:
```

```
## tau2 = 0.0225 [0.0114; 0.0571]; tau = 0.1499 [0.1070; 0.2389]
```

```
## I2 = 79.5% [70.0%; 86.1%]; H = 2.21 [1.82; 2.68]
```

```
##
```

```
## Test of heterogeneity:
```

```
##      Q d.f. p-value
```

```
## 107.46  22 < 0.0001
```

```
##
```

```
## Details on meta-analytical method:
```

```
## - Inverse variance method
```

```
## - Restricted maximum-likelihood estimator for tau2
```

```
## - Q-Profile method for confidence interval of tau2 and tau
```

```
## - Trim-and-fill method to adjust for funnel plot asymmetry (L-estimator)
```

```
forest(trimfill(sfr_metabin),
       sortvar = TE)
```

```
## Warning in trimfill.meta(sfr_metabin): 1 observation(s) dropped due to missing
## values
```

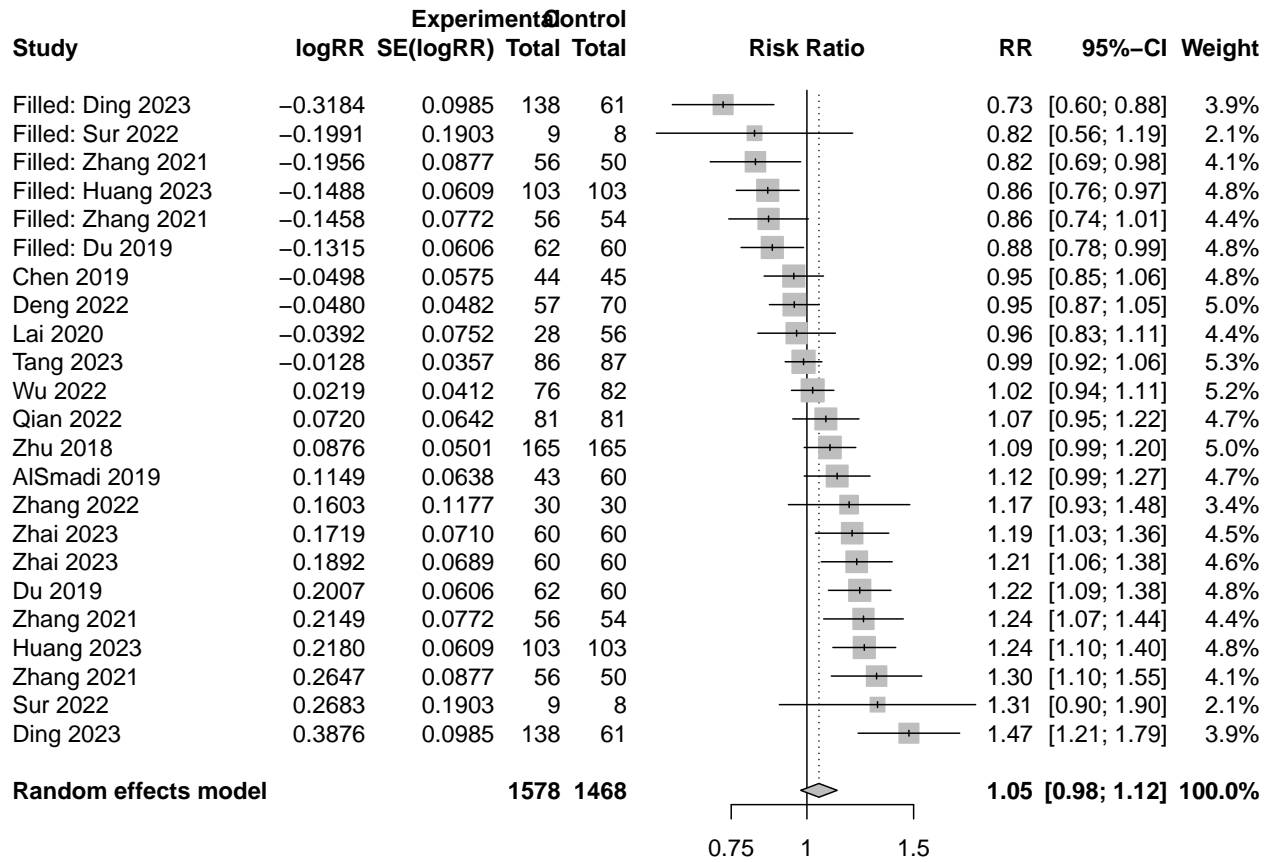

Heterogeneity:  $I^2 = 80\%$ ,  $\tau^2 = 0.0225$ ,  $p < 0.01$

#### 4.2.4 Funnel plot

```
funnel(trimfill(sfr_metabin))
```

```
## Warning in trimfill.meta(sfr_metabin): 1 observation(s) dropped due to missing  
## values
```

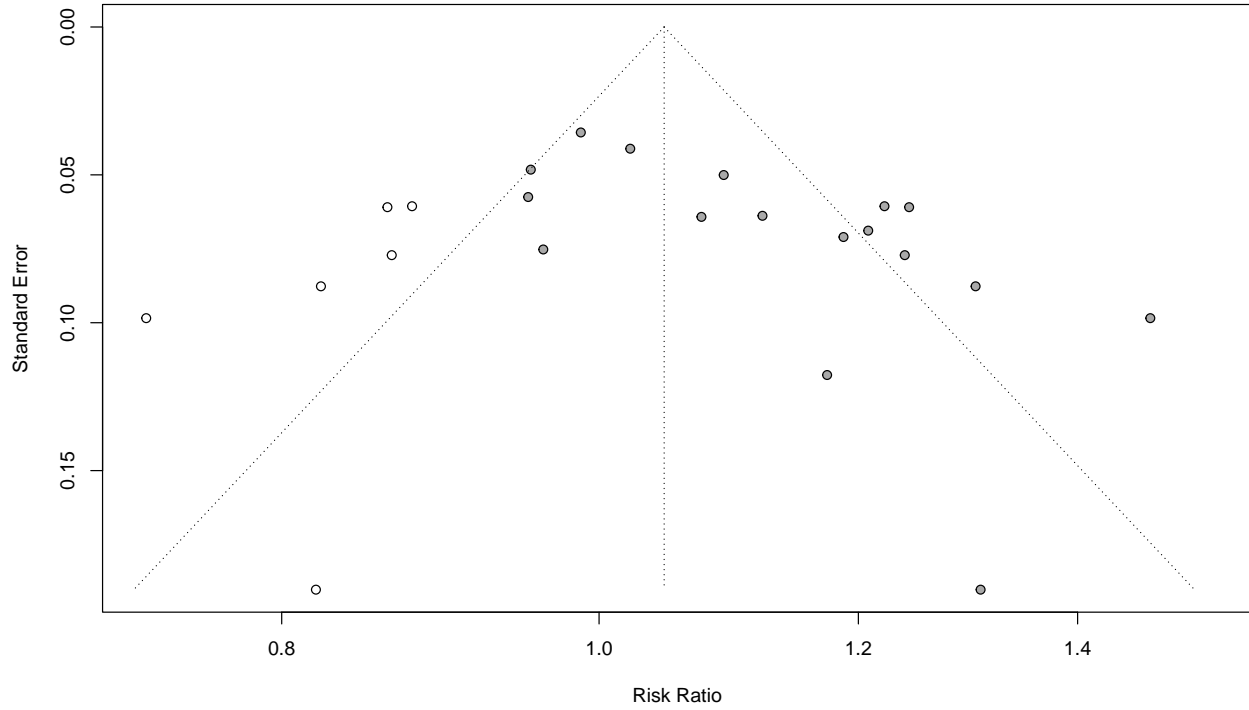

#### 4.2.5 Baujat

```
baujat(sfr_metabin, pos = 1)
```

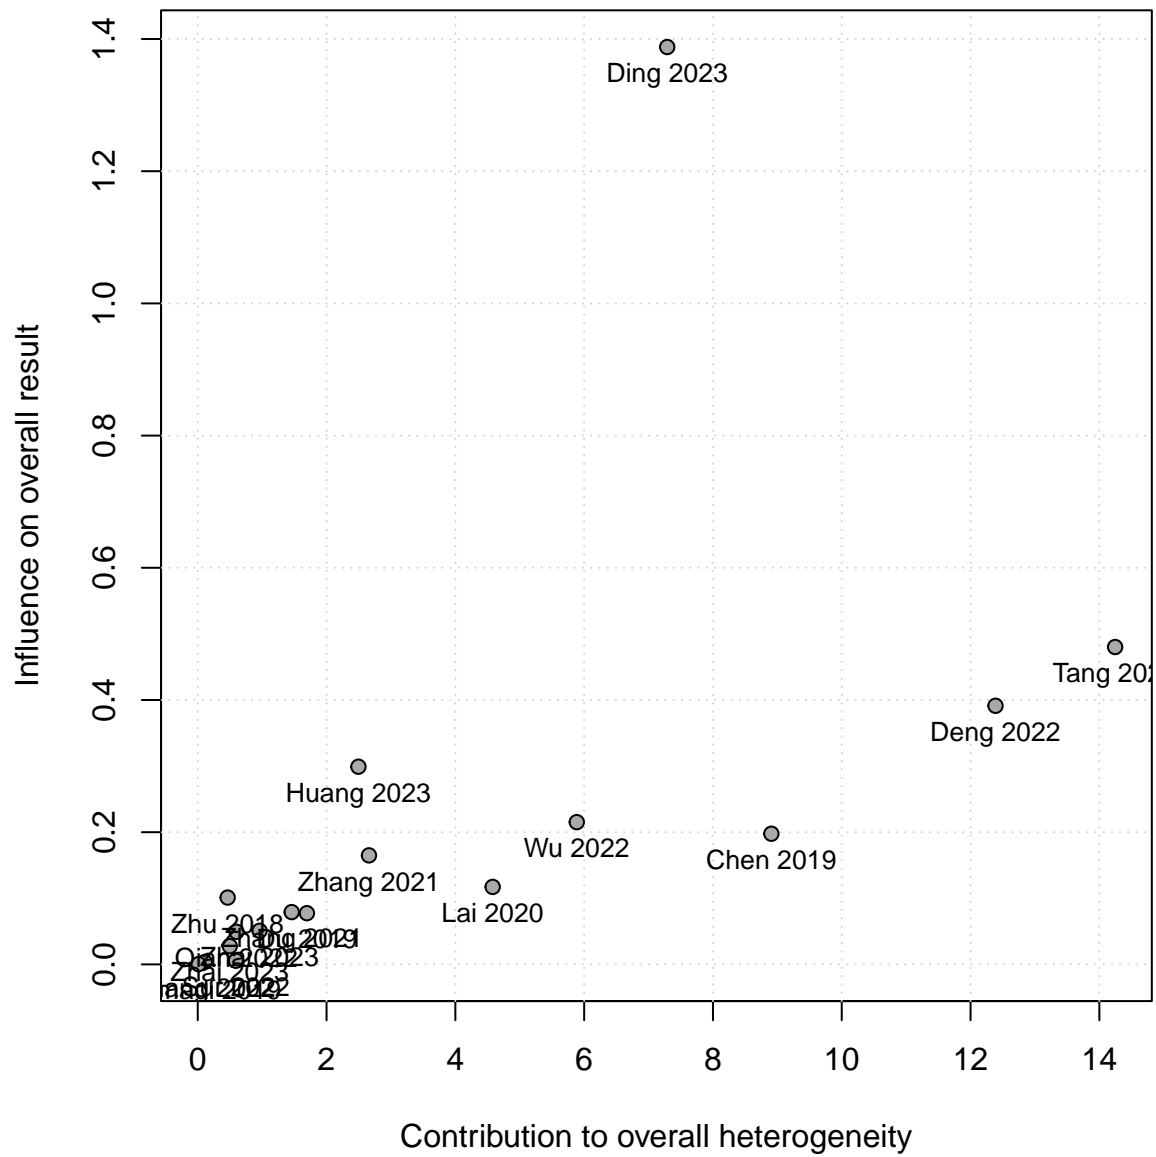



## 4.2.6 Leave one out

```
metainf(sfr_metabin)
```

```
## Influential analysis (common effect model)
##
##              RR          95%-CI  p-value  tau^2    tau
## Omitting Sur 2022      1.1281 [1.0921; 1.1653] < 0.0001  0.0103  0.1015
## Omitting Tang 2023     1.1434 [1.1044; 1.1839] < 0.0001  0.0099  0.0994
## Omitting Chen 2019     1.1381 [1.1007; 1.1768] < 0.0001  0.0094  0.0969
## Omitting Du 2019      1.1241 [1.0871; 1.1624] < 0.0001  0.0105  0.1023
## Omitting Lai 2020     1.1360 [1.0990; 1.1743] < 0.0001  0.0100  0.1002
## Omitting Zhu 2018     1.1357 [1.0977; 1.1751] < 0.0001  0.0114  0.1069
## Omitting Zhang 2021   1.1218 [1.0855; 1.1593] < 0.0001  0.0097  0.0983
## Omitting Zhang 2021   1.1241 [1.0875; 1.1620] < 0.0001  0.0103  0.1016
## Omitting Lechevallier 2003 1.1295 [1.0935; 1.1666] < 0.0001  0.0102  0.1011
## Omitting Huang 2023   1.1190 [1.0820; 1.1571] < 0.0001  0.0101  0.1006
## Omitting Wu 2022     1.1387 [1.1002; 1.1785] < 0.0001  0.0108  0.1038
## Omitting Ding 2023    1.1081 [1.0734; 1.1439] < 0.0001  0.0078  0.0882
## Omitting Zhai 2023    1.1252 [1.0883; 1.1633] < 0.0001  0.0107  0.1033
## Omitting Zhai 2023    1.1263 [1.0895; 1.1644] < 0.0001  0.0109  0.1043
## Omitting Qian 2022    1.1338 [1.0965; 1.1724] < 0.0001  0.0113  0.1061
## Omitting Zhang 2022   1.1284 [1.0921; 1.1658] < 0.0001  0.0108  0.1037
## Omitting Deng 2022    1.1418 [1.1037; 1.1811] < 0.0001  0.0091  0.0955
## Omitting AlSmadi 2019 1.1299 [1.0928; 1.1682] < 0.0001  0.0113  0.1063
##
## Pooled estimate      1.1295 [1.0935; 1.1666] < 0.0001  0.0102  0.1011
##
##              I^2
## Omitting Sur 2022      72.6%
## Omitting Tang 2023     68.8%
## Omitting Chen 2019     70.3%
## Omitting Du 2019      70.8%
## Omitting Lai 2020     71.8%
## Omitting Zhu 2018     73.1%
## Omitting Zhang 2021   70.6%
## Omitting Zhang 2021   71.4%
## Omitting Lechevallier 2003 71.3%
## Omitting Huang 2023   70.0%
## Omitting Wu 2022     72.0%
## Omitting Ding 2023    67.1%
## Omitting Zhai 2023    71.7%
## Omitting Zhai 2023    72.2%
## Omitting Qian 2022    73.1%
## Omitting Zhang 2022   72.8%
## Omitting Deng 2022    68.9%
## Omitting AlSmadi 2019 72.9%
##
## Pooled estimate      71.3%
##
## Details on meta-analytical method:
## - Mantel-Haenszel method
## - Restricted maximum-likelihood estimator for tau^2
```

## 4.3 OR time

### 4.3.1 Meta-analysis

```
or_time_metacont <- metacont(data = suction_data,
                             mean.c = or_time_min_mean_control,
                             sd.c = or_time_min_sd_control,
                             mean.e = or_time_min_mean_suction,
                             sd.e = or_time_min_sd_suction,
                             n.e = sample_size_suction,
                             n.c = sample_size_control,
                             studlab = author_year)

or_time_metacont

## Number of studies: k = 17
## Number of observations: o = 2311
##
##              MD              95%-CI      z  p-value
## Common effect model -4.3890 [-5.2316; -3.5465] -10.21 < 0.0001
## Random effects model -2.3165 [-7.0736; 2.4406]  -0.95  0.3399
##
## Quantifying heterogeneity:
## tau^2 = 86.9189 [43.8218; 240.2239]; tau = 9.3230 [6.6198; 15.4992]
## I^2 = 94.6% [92.7%; 96.0%]; H = 4.32 [3.71; 5.03]
##
## Test of heterogeneity:
##      Q d.f.  p-value
## 298.66  16 < 0.0001
##
## Details on meta-analytical method:
## - Inverse variance method
## - Restricted maximum-likelihood estimator for tau^2
## - Q-Profile method for confidence interval of tau^2 and tau
```

### 4.3.2 Forest plot

```
forest(or_time_metacont,
      sortvar = TE)
```

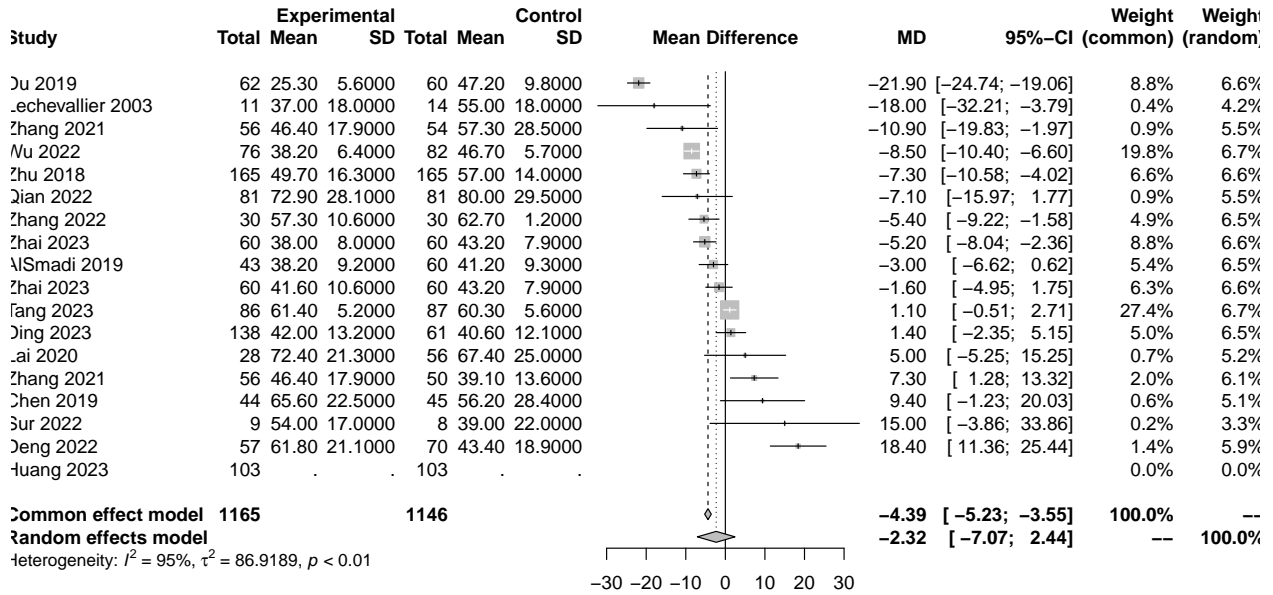

### 4.3.3 Trim and Fill

```
trimfill(or_time_metacont)
```

```
## Warning in trimfill.meta(or_time_metacont): 1 observation(s) dropped due to
## missing values
```

```
## Number of studies: k = 19 (with 2 added studies)
```

```
## Number of observations: o = 2249
```

```
##
```

```
## MD 95%-CI z p-value
```

```
## Random effects model -4.3665 [-9.6885; 0.9556] -1.61 0.1078
```

```
##
```

```
## Quantifying heterogeneity:
```

```
## tau^2 = 123.4763 [65.6084; 320.2203]; tau = 11.1120 [8.0999; 17.8947]
```

```
## I^2 = 94.8% [93.1%; 96.1%]; H = 4.38 [3.80; 5.05]
```

```
##
```

```
## Test of heterogeneity:
```

```
## Q d.f. p-value
```

```
## 345.16 18 < 0.0001
```

```
##
```

```
## Details on meta-analytical method:
```

```
## - Inverse variance method
```

```
## - Restricted maximum-likelihood estimator for tau^2
```

```
## - Q-Profile method for confidence interval of tau^2 and tau
```

```
## - Trim-and-fill method to adjust for funnel plot asymmetry (L-estimator)
```

```
forest(trimfill(or_time_metacont),
        sortvar = TE)
```

```
## Warning in trimfill.meta(or_time_metacont): 1 observation(s) dropped due to
## missing values
```

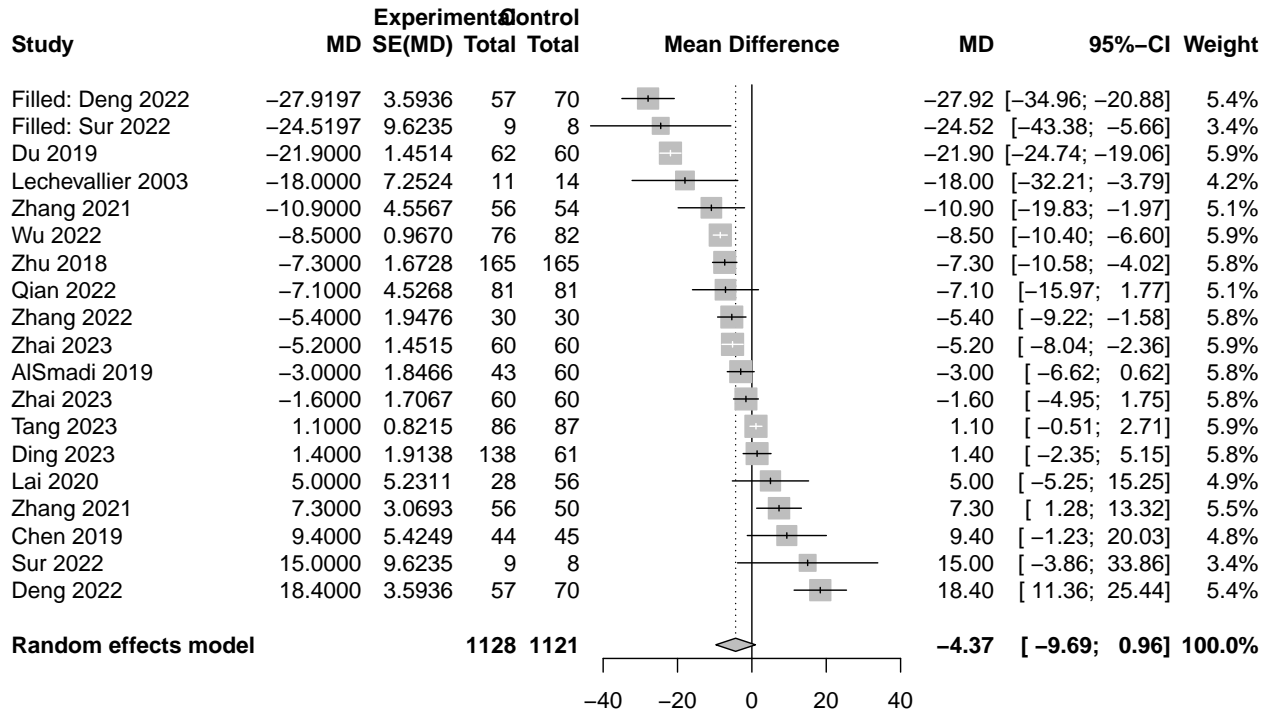

Heterogeneity:  $I^2 = 95\%$ ,  $\tau^2 = 123.4763$ ,  $p < 0.01$

#### 4.3.4 Funnel plot

```
funnel(trimfill(or_time_metacont))
```

```
## Warning in trimfill.meta(or_time_metacont): 1 observation(s) dropped due to  
## missing values
```

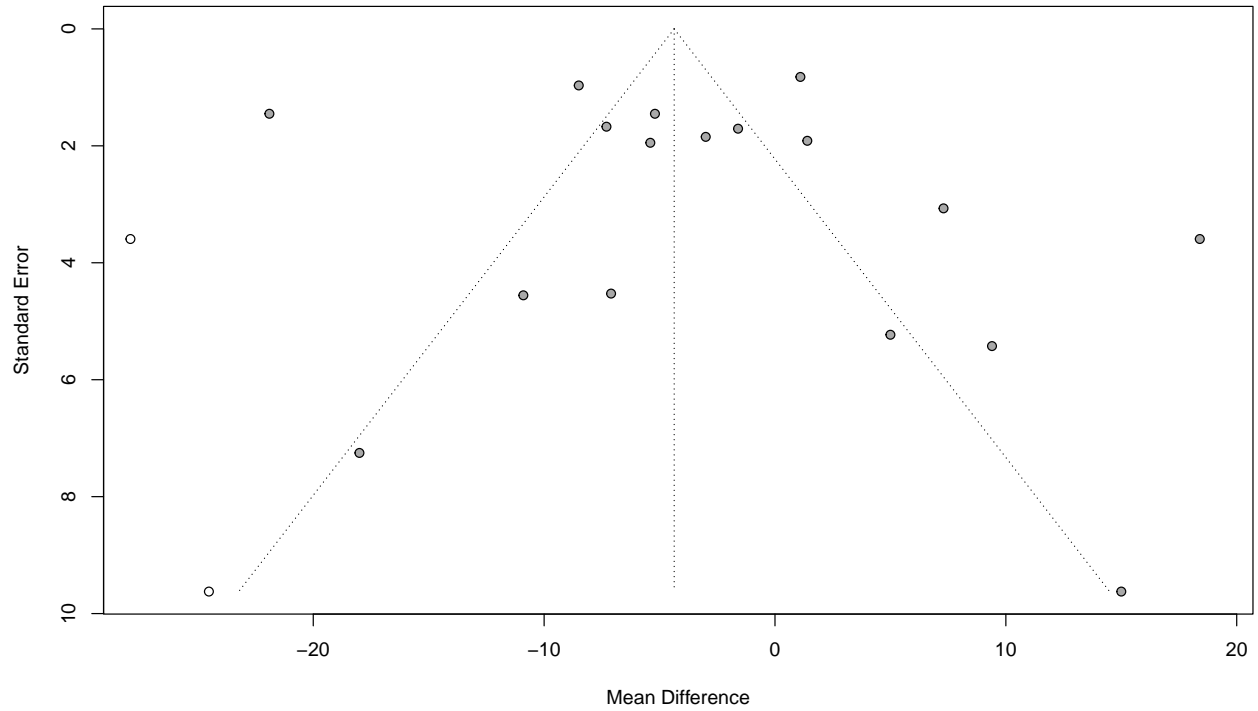

### 4.3.5 Baujat

```
baujat(or_time_metacont, pos = 1)
```

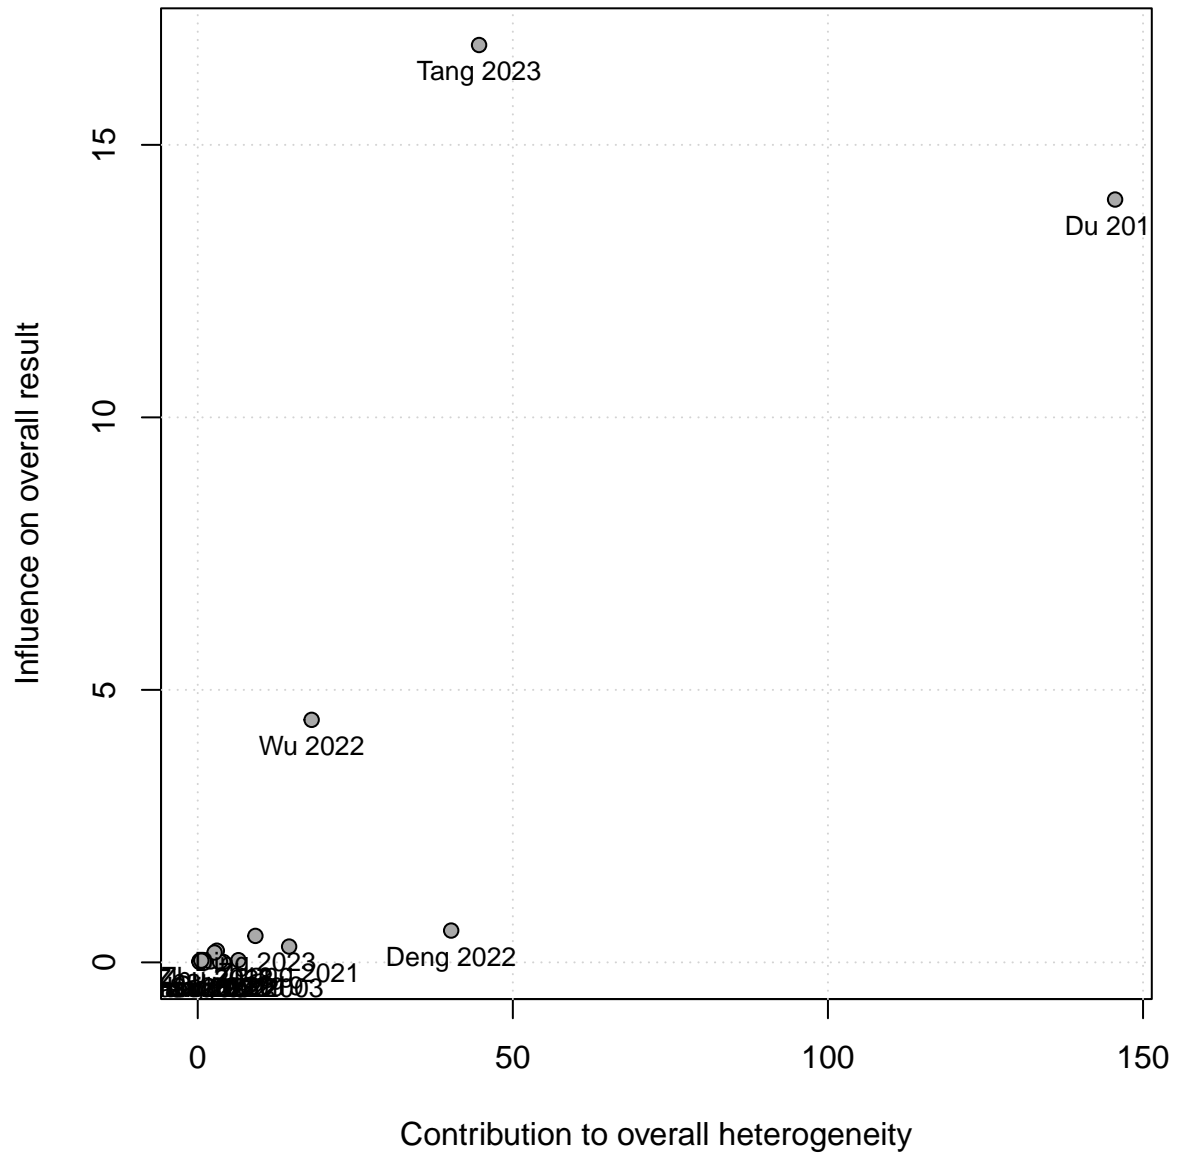

### 4.3.6 Leave one out

```
metainf(or_time_metacont)
```

```
## Influential analysis (common effect model)
##
##
## MD 95%-CI p-value tau^2
## Omitting Sur 2022 -4.4278 [-5.2712; -3.5845] < 0.0001 84.0556
## Omitting Tang 2023 -6.4585 [-7.4472; -5.4699] < 0.0001 93.6182
## Omitting Chen 2019 -4.4762 [-5.3213; -3.6310] < 0.0001 85.0733
## Omitting Du 2019 -2.7053 [-3.5874; -1.8232] < 0.0001 56.3894
## Omitting Lai 2020 -4.4529 [-5.2982; -3.6075] < 0.0001 89.7887
## Omitting Zhu 2018 -4.1832 [-5.0550; -3.3114] < 0.0001 92.7198
## Omitting Zhang 2021 -4.6229 [-5.4738; -3.7720] < 0.0001 86.1904
## Omitting Zhang 2021 -4.3306 [-5.1769; -3.4843] < 0.0001 89.2014
## Omitting Lechevallier 2003 -4.3411 [-5.1851; -3.4971] < 0.0001 83.7396
## Omitting Huang 2023 -4.3890 [-5.2316; -3.5465] < 0.0001 86.9189
## Omitting Wu 2022 -3.3768 [-4.3173; -2.4362] < 0.0001 91.5327
## Omitting Ding 2023 -4.6966 [-5.5612; -3.8320] < 0.0001 93.2403
## Omitting Zhai 2023 -4.5780 [-5.4485; -3.7074] < 0.0001 94.6806
## Omitting Zhai 2023 -4.3111 [-5.1932; -3.4290] < 0.0001 94.1958
## Omitting Qian 2022 -4.3644 [-5.2107; -3.5181] < 0.0001 92.2874
## Omitting Zhang 2022 -4.3373 [-5.2011; -3.4735] < 0.0001 93.9887
## Omitting Deng 2022 -4.7199 [-5.5685; -3.8713] < 0.0001 60.3555
## Omitting AlSmadi 2019 -4.4686 [-5.3349; -3.6023] < 0.0001 94.7187
##
## Pooled estimate -4.3890 [-5.2316; -3.5465] < 0.0001 86.9189
##
## tau I^2
## Omitting Sur 2022 9.1682 94.9%
## Omitting Tang 2023 9.6756 93.7%
## Omitting Chen 2019 9.2235 94.9%
## Omitting Du 2019 7.5093 89.2%
## Omitting Lai 2020 9.4757 94.9%
## Omitting Zhu 2018 9.6291 94.9%
## Omitting Zhang 2021 9.2839 94.7%
## Omitting Zhang 2021 9.4446 94.9%
## Omitting Lechevallier 2003 9.1509 94.9%
## Omitting Huang 2023 9.3230 94.6%
## Omitting Wu 2022 9.5673 94.6%
## Omitting Ding 2023 9.6561 94.8%
## Omitting Zhai 2023 9.7304 94.9%
## Omitting Zhai 2023 9.7055 95.0%
## Omitting Qian 2022 9.6066 95.0%
## Omitting Zhang 2022 9.6948 95.0%
## Omitting Deng 2022 7.7689 94.2%
## Omitting AlSmadi 2019 9.7324 95.0%
##
## Pooled estimate 9.3230 94.6%
##
## Details on meta-analytical method:
## - Inverse variance method
## - Restricted maximum-likelihood estimator for tau^2
```

## 4.4 Auxiliary Treatments

### 4.4.1 Meta-analysis

```
aux_rx_metabin <- metabin(data = suction_data,
                          event.c = auxillary_tx_n_control,
                          n.c = sample_size_control,
                          event.e = auxillary_tx_n_suction,
                          n.e = sample_size_suction,
                          studlab = author_year)

aux_rx_metabin

## Number of studies: k = 8
## Number of observations: o = 2311
## Number of events: e = 99
##
##              RR          95%-CI      z p-value
## Common effect model 0.8130 [0.5619; 1.1762] -1.10 0.2718
## Random effects model 0.8131 [0.3143; 2.1030] -0.43 0.6695
##
## Quantifying heterogeneity:
## tau^2 = 1.2043 [0.2081; 7.9665]; tau = 1.0974 [0.4562; 2.8225]
## I^2 = 71.5% [41.2%; 86.2%]; H = 1.87 [1.30; 2.69]
##
## Test of heterogeneity:
##      Q d.f. p-value
## 24.54   7 0.0009
##
## Details on meta-analytical method:
## - Mantel-Haenszel method
## - Inverse variance method
## - Restricted maximum-likelihood estimator for tau^2
## - Q-Profile method for confidence interval of tau^2 and tau
## - Continuity correction of 0.5 in studies with zero cell frequencies
```



#### 4.4.2 Forest plot

```
forest(aux_rx_metabin,
       sortvar = TE)
```

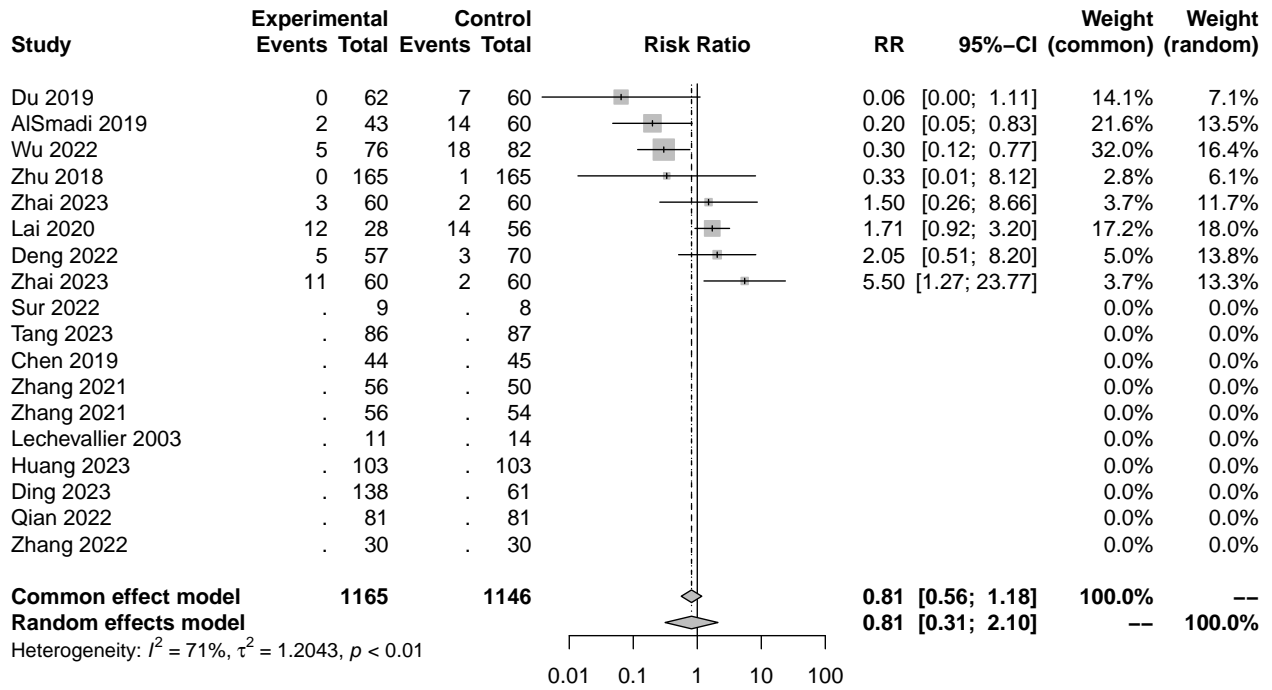

### 4.4.3 Trim and Fill

```
trimfill(aux_rx_metabin)
```

```
## Warning in trimfill.meta(aux_rx_metabin): 10 observation(s) dropped due to
## missing values

## Number of studies: k = 10 (with 2 added studies)
## Number of observations: o = 1389
## Number of events: e = 122
##
##                RR          95%-CI    z p-value
## Random effects model 1.2822 [0.4699; 3.4990] 0.49 0.6274
##
## Quantifying heterogeneity:
## tau^2 = 1.8288 [0.5190; 9.9900]; tau = 1.3523 [0.7204; 3.1607]
## I^2 = 75.2% [53.8%; 86.7%]; H = 2.01 [1.47; 2.74]
##
## Test of heterogeneity:
##      Q d.f.  p-value
## 36.29   9 < 0.0001
##
## Details on meta-analytical method:
## - Inverse variance method
## - Restricted maximum-likelihood estimator for tau^2
## - Q-Profile method for confidence interval of tau^2 and tau
## - Trim-and-fill method to adjust for funnel plot asymmetry (L-estimator)
```

```
forest(trimfill(aux_rx_metabin),
        sortvar = TE)
```

```
## Warning in trimfill.meta(aux_rx_metabin): 10 observation(s) dropped due to
## missing values
```

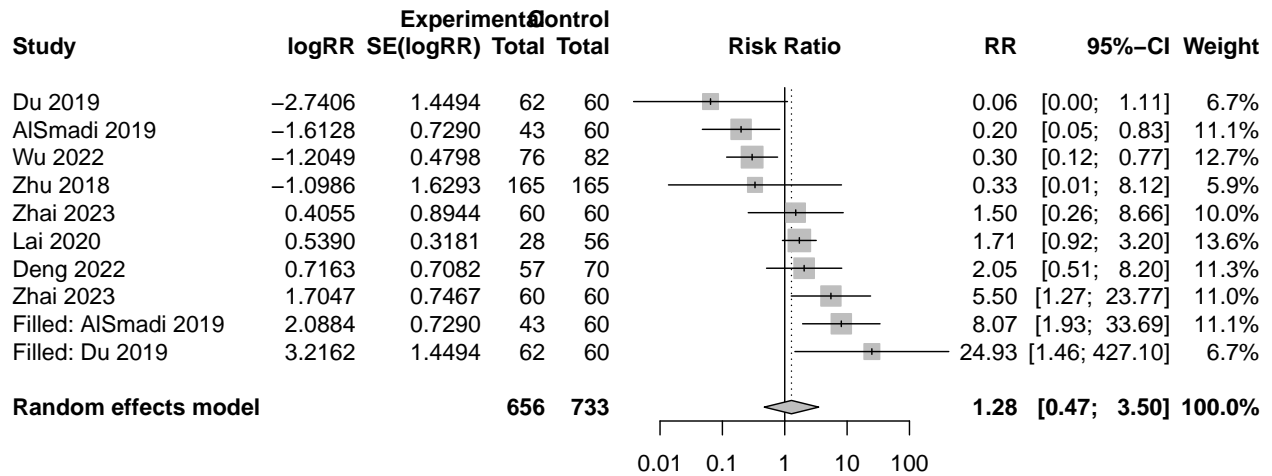

#### 4.4.4 Funnel plot

```
funnel(trimfill(aux_rx_metabin))
```

```
## Warning in trimfill.meta(aux_rx_metabin): 10 observation(s) dropped due to  
## missing values
```

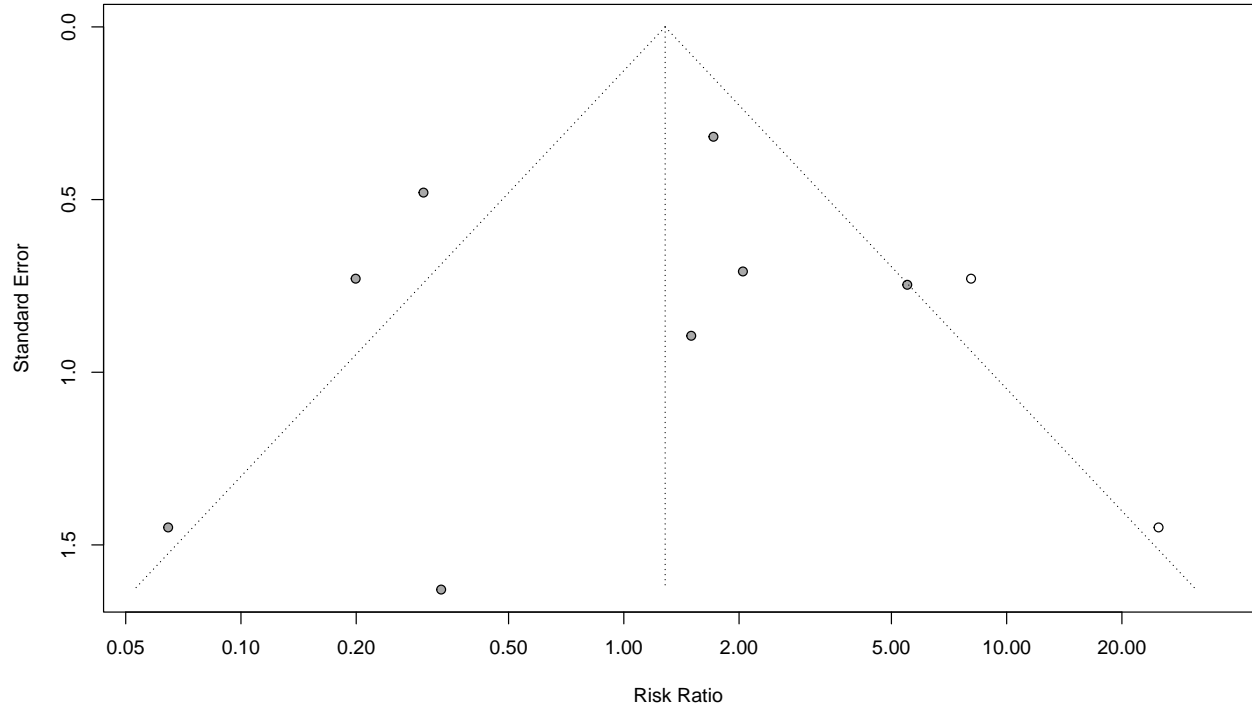

#### 4.4.5 Baujat

```
baujat(aux_rx_metabin, pos = 1)
```

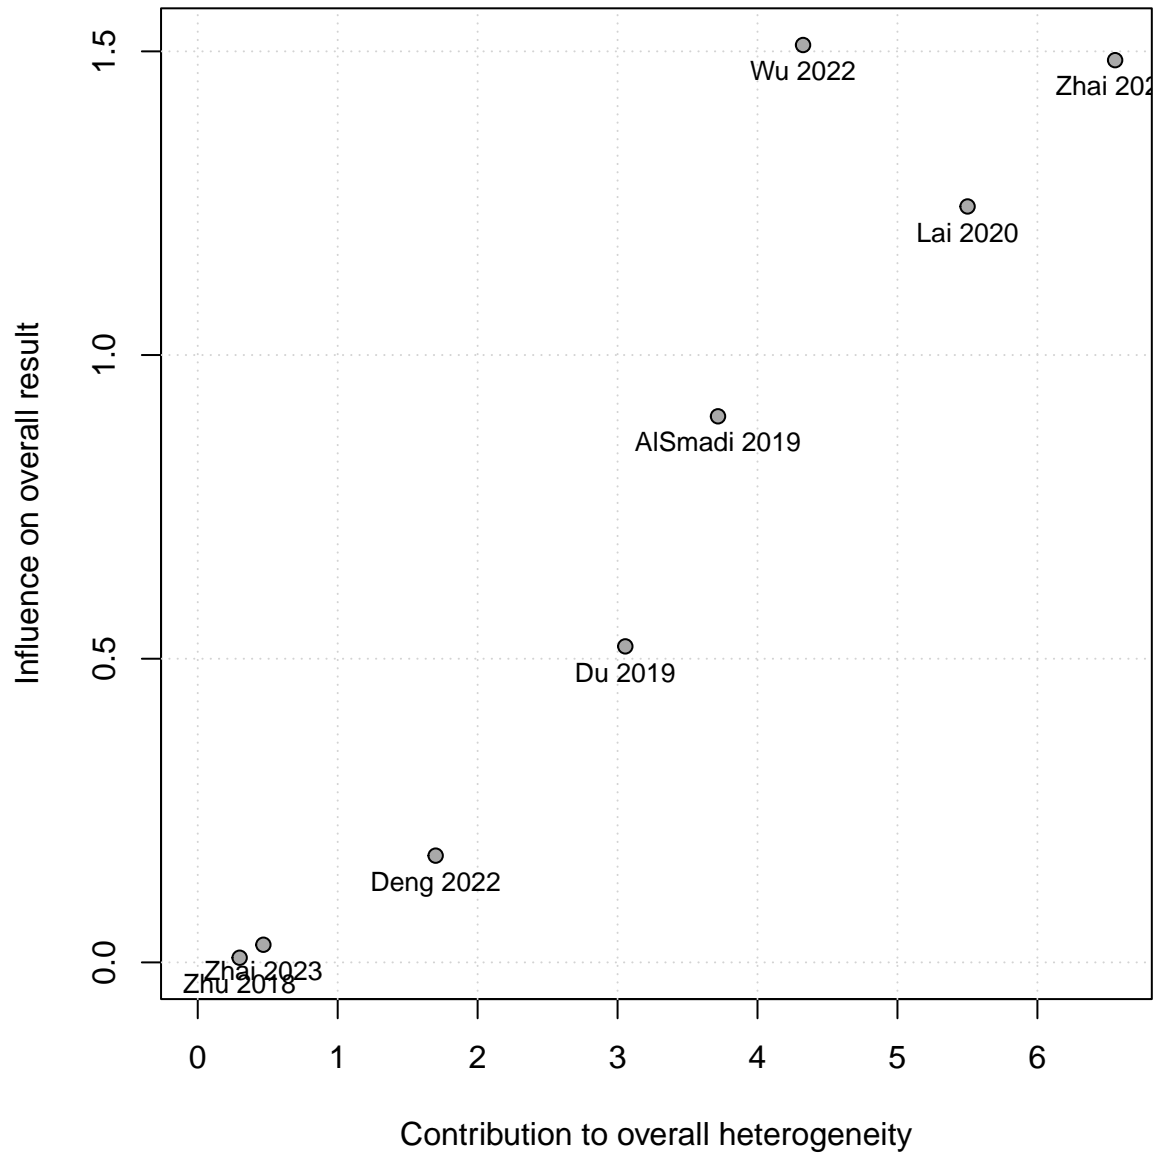

#### 4.4.6 Leave one out

```
metainf(aux_rx_metabin)
```

```
## Influential analysis (common effect model)
##
##
##          RR          95%-CI p-value  tau^2    tau
## Omitting Sur 2022      0.8130 [0.5619; 1.1762]  0.2718  1.2043  1.0974
## Omitting Tang 2023     0.8130 [0.5619; 1.1762]  0.2718  1.2043  1.0974
## Omitting Chen 2019     0.8130 [0.5619; 1.1762]  0.2718  1.2043  1.0974
## Omitting Du 2019       0.9355 [0.6388; 1.3702]  0.7321  1.0233  1.0116
## Omitting Lai 2020      0.6253 [0.3942; 0.9916]  0.0460  1.4577  1.2074
## Omitting Zhu 2018      0.8266 [0.5697; 1.1994]  0.3161  1.3166  1.1475
## Omitting Zhang 2021    0.8130 [0.5619; 1.1762]  0.2718  1.2043  1.0974
## Omitting Zhang 2021    0.8130 [0.5619; 1.1762]  0.2718  1.2043  1.0974
## Omitting Lechevallier 2003 0.8130 [0.5619; 1.1762]  0.2718  1.2043  1.0974
## Omitting Huang 2023    0.8130 [0.5619; 1.1762]  0.2718  1.2043  1.0974
## Omitting Wu 2022       1.0542 [0.6965; 1.5956]  0.8028  1.1805  1.0865
## Omitting Ding 2023     0.8130 [0.5619; 1.1762]  0.2718  1.2043  1.0974
## Omitting Zhai 2023     0.6332 [0.4237; 0.9464]  0.0258  0.8648  0.9300
## Omitting Zhai 2023     0.7866 [0.5387; 1.1487]  0.2141  1.4761  1.2149
## Omitting Qian 2022     0.8130 [0.5619; 1.1762]  0.2718  1.2043  1.0974
## Omitting Zhang 2022    0.8130 [0.5619; 1.1762]  0.2718  1.2043  1.0974
## Omitting Deng 2022     0.7484 [0.5083; 1.1019]  0.1420  1.4007  1.1835
## Omitting AlSmadi 2019  0.9819 [0.6646; 1.4505]  0.9268  1.0099  1.0049
##
## Pooled estimate      0.8130 [0.5619; 1.1762]  0.2718  1.2043  1.0974
##
##          I^2
## Omitting Sur 2022      71.5%
## Omitting Tang 2023     71.5%
## Omitting Chen 2019     71.5%
## Omitting Du 2019       71.2%
## Omitting Lai 2020      69.4%
## Omitting Zhu 2018      75.1%
## Omitting Zhang 2021    71.5%
## Omitting Zhang 2021    71.5%
## Omitting Lechevallier 2003 71.5%
## Omitting Huang 2023    71.5%
## Omitting Wu 2022       63.6%
## Omitting Ding 2023     71.5%
## Omitting Zhai 2023     68.4%
## Omitting Zhai 2023     75.3%
## Omitting Qian 2022     71.5%
## Omitting Zhang 2022    71.5%
## Omitting Deng 2022     74.4%
## Omitting AlSmadi 2019  68.6%
##
## Pooled estimate      71.5%
##
## Details on meta-analytical method:
## - Mantel-Haenszel method
## - Restricted maximum-likelihood estimator for tau^2
```

## 4.5 VAS

### 4.5.1 Meta-analysis

```
vas_metacont <- metacont(data = suction_data,
                        mean.c = vas_score_mean_control,
                        sd.c = vas_score_sd_control,
                        mean.e = vas_score_mean_suction,
                        sd.e = vas_score_sd_suction,
                        n.e = sample_size_suction,
                        n.c = sample_size_control,
                        studlab = author_year)

vas_metacont

## Number of studies: k = 2
## Number of observations: o = 2311
##
##              MD              95%-CI      z  p-value
## Common effect model -0.7490 [-1.0195; -0.4785] -5.43 < 0.0001
## Random effects model -1.2038 [-2.9282; 0.5207] -1.37 0.1713
##
## Quantifying heterogeneity:
## tau^2 = 1.4954; tau = 1.2229; I^2 = 96.6% [90.7%; 98.7%]; H = 5.39 [3.27; 8.87]
##
## Test of heterogeneity:
##      Q d.f.  p-value
## 29.01   1 < 0.0001
##
## Details on meta-analytical method:
## - Inverse variance method
## - Restricted maximum-likelihood estimator for tau^2
```

### 4.5.2 Forest plot

```
forest(vas_metacont,
       sortvar = TE)
```

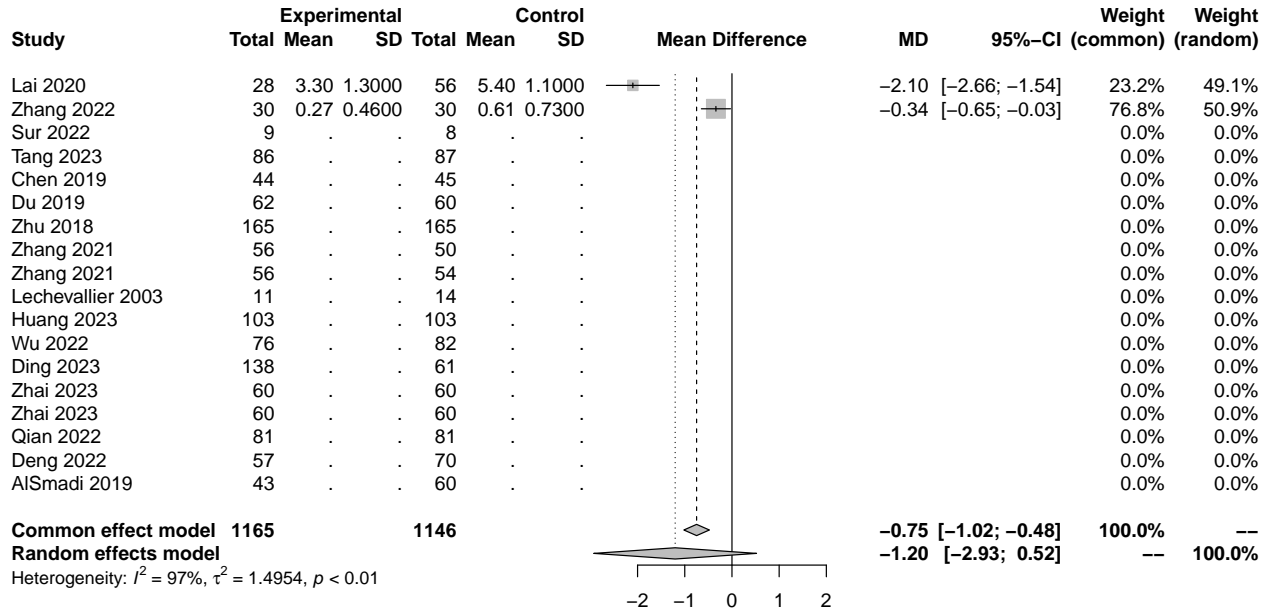

### 4.5.3 Trim and Fill

```
#trimfill(vas_metacont)  
#forest(trimfill(vas_metacont))
```



#### 4.5.4 Funnel plot

```
funnel((vas_metacont))
```

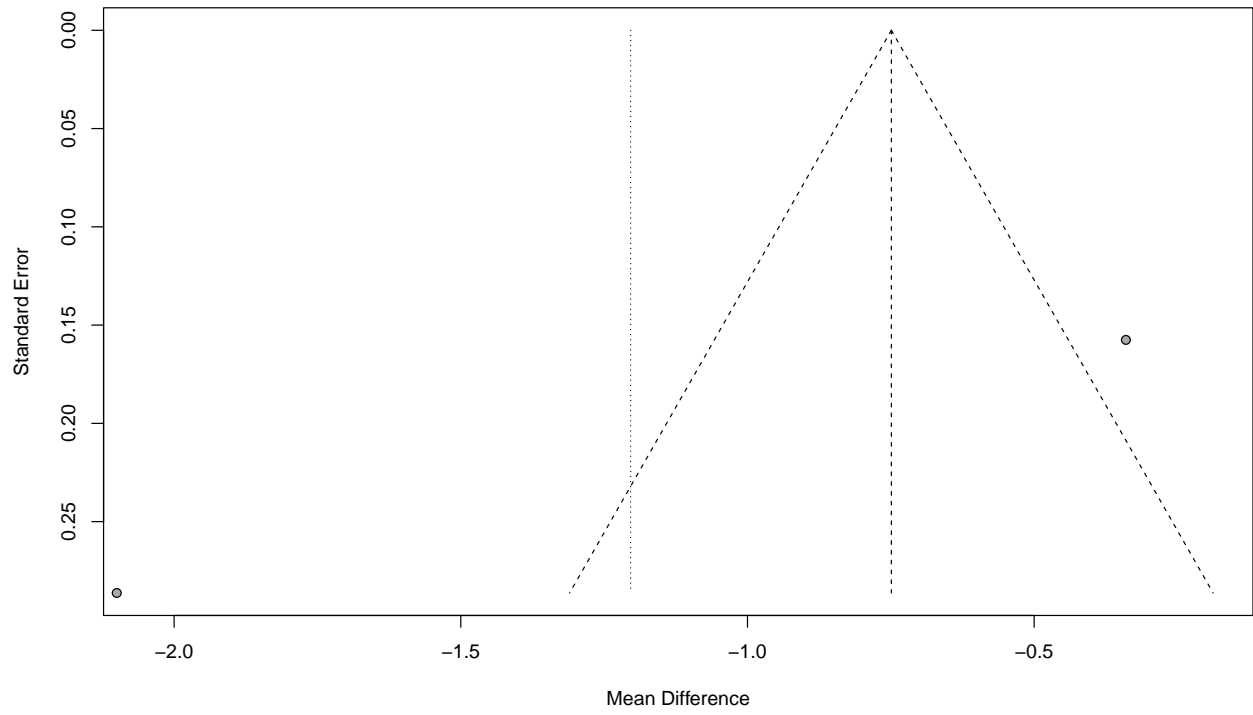

#### 4.5.5 Baujat

```
baujat(vas_metacont, pos = 1)
```

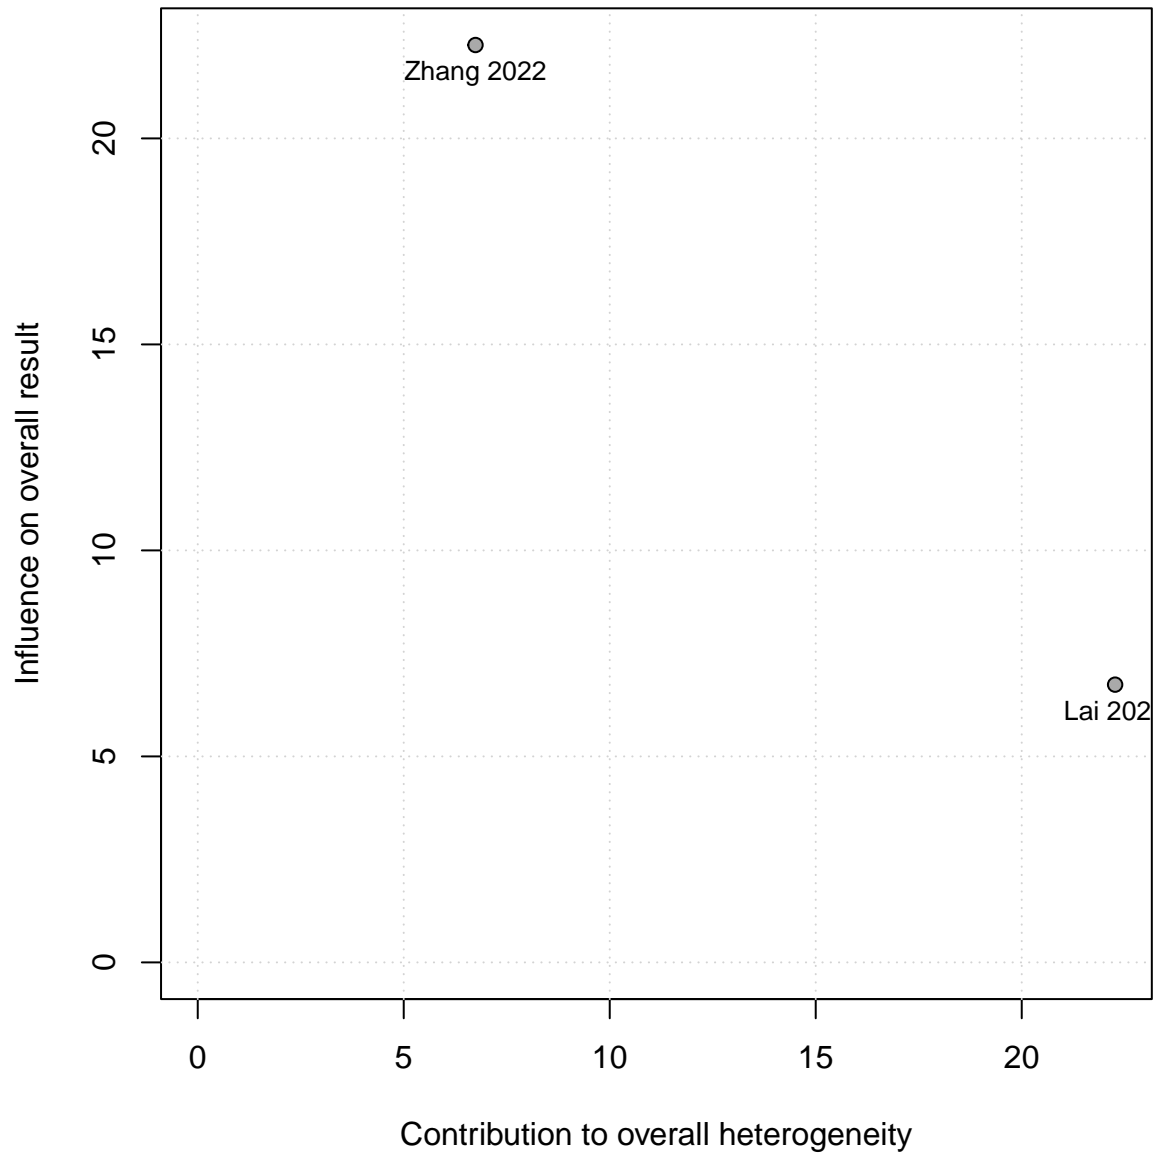

#### 4.5.6 Leave one out

```
metainf(vas_metacont)
```

```
## Influential analysis (common effect model)
##
##
## MD 95%-CI p-value tau^2
## Omitting Sur 2022 -0.7490 [-1.0195; -0.4785] < 0.0001 1.4954
## Omitting Tang 2023 -0.7490 [-1.0195; -0.4785] < 0.0001 1.4954
## Omitting Chen 2019 -0.7490 [-1.0195; -0.4785] < 0.0001 1.4954
## Omitting Du 2019 -0.7490 [-1.0195; -0.4785] < 0.0001 1.4954
## Omitting Lai 2020 -0.3400 [-0.6488; -0.0312] 0.0309
## Omitting Zhu 2018 -0.7490 [-1.0195; -0.4785] < 0.0001 1.4954
## Omitting Zhang 2021 -0.7490 [-1.0195; -0.4785] < 0.0001 1.4954
## Omitting Zhang 2021 -0.7490 [-1.0195; -0.4785] < 0.0001 1.4954
## Omitting Lechevallier 2003 -0.7490 [-1.0195; -0.4785] < 0.0001 1.4954
## Omitting Huang 2023 -0.7490 [-1.0195; -0.4785] < 0.0001 1.4954
## Omitting Wu 2022 -0.7490 [-1.0195; -0.4785] < 0.0001 1.4954
## Omitting Ding 2023 -0.7490 [-1.0195; -0.4785] < 0.0001 1.4954
## Omitting Zhai 2023 -0.7490 [-1.0195; -0.4785] < 0.0001 1.4954
## Omitting Zhai 2023 -0.7490 [-1.0195; -0.4785] < 0.0001 1.4954
## Omitting Qian 2022 -0.7490 [-1.0195; -0.4785] < 0.0001 1.4954
## Omitting Zhang 2022 -2.1000 [-2.6611; -1.5389] < 0.0001
## Omitting Deng 2022 -0.7490 [-1.0195; -0.4785] < 0.0001 1.4954
## Omitting AlSmadi 2019 -0.7490 [-1.0195; -0.4785] < 0.0001 1.4954
##
## Pooled estimate -0.7490 [-1.0195; -0.4785] < 0.0001 1.4954
## tau I^2
## Omitting Sur 2022 1.2229 96.6%
## Omitting Tang 2023 1.2229 96.6%
## Omitting Chen 2019 1.2229 96.6%
## Omitting Du 2019 1.2229 96.6%
## Omitting Lai 2020
## Omitting Zhu 2018 1.2229 96.6%
## Omitting Zhang 2021 1.2229 96.6%
## Omitting Zhang 2021 1.2229 96.6%
## Omitting Lechevallier 2003 1.2229 96.6%
## Omitting Huang 2023 1.2229 96.6%
## Omitting Wu 2022 1.2229 96.6%
## Omitting Ding 2023 1.2229 96.6%
## Omitting Zhai 2023 1.2229 96.6%
## Omitting Zhai 2023 1.2229 96.6%
## Omitting Qian 2022 1.2229 96.6%
## Omitting Zhang 2022
## Omitting Deng 2022 1.2229 96.6%
## Omitting AlSmadi 2019 1.2229 96.6%
##
## Pooled estimate 1.2229 96.6%
##
## Details on meta-analytical method:
## - Inverse variance method
## - Restricted maximum-likelihood estimator for tau^2
```

## 4.6 LoS

### 4.6.1 Meta-analysis

```
los_metacont <- metacont(data = suction_data,
                        mean.c = los_days_mean_control,
                        sd.c = los_days_sd_control,
                        mean.e = los_days_mean_suction,
                        sd.e = los_days_sd_suction,
                        n.e = sample_size_suction,
                        n.c = sample_size_control,
                        studlab = author_year)

los_metacont

## Number of studies: k = 9
## Number of observations: o = 2311
##
##              MD              95%-CI      z  p-value
## Common effect model -0.3668 [-0.4500; -0.2837] -8.65 < 0.0001
## Random effects model -1.0877 [-1.9003; -0.2752] -2.62  0.0087
##
## Quantifying heterogeneity:
## tau^2 = 1.4367 [0.5938; 5.7266]; tau = 1.1986 [0.7706; 2.3930]
## I^2 = 92.6% [88.1%; 95.4%]; H = 3.67 [2.90; 4.65]
##
## Test of heterogeneity:
##      Q d.f.  p-value
## 107.98   8 < 0.0001
##
## Details on meta-analytical method:
## - Inverse variance method
## - Restricted maximum-likelihood estimator for tau^2
## - Q-Profile method for confidence interval of tau^2 and tau
```

## 4.6.2 Forest plot

```
forest(los_metacont,
      sortvar = TE)
```

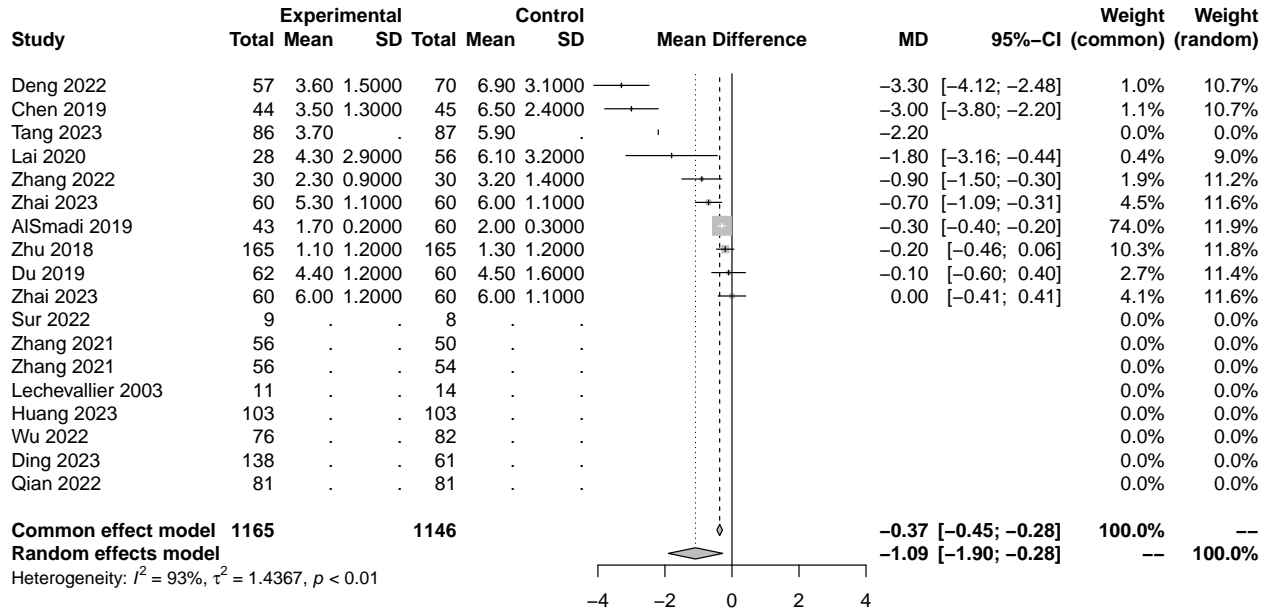

### 4.6.3 Trim and Fill

```
trimfill(los_metacont)
```

```
## Warning in trimfill.meta(los_metacont): 9 observation(s) dropped due to missing
## values
```

```
## Number of studies: k = 12 (with 3 added studies)
```

```
## Number of observations: o = 1455
```

```
##
```

```
## MD 95%-CI z p-value
```

```
## Random effects model -0.3345 [-1.3661; 0.6970] -0.64 0.5250
```

```
##
```

```
## Quantifying heterogeneity:
```

```
## tau^2 = 3.1716 [1.5169; 9.6686]; tau = 1.7809 [1.2316; 3.1094]
```

```
## I^2 = 94.8% [92.5%; 96.4%]; H = 4.37 [3.64; 5.24]
```

```
##
```

```
## Test of heterogeneity:
```

```
## Q d.f. p-value
```

```
## 209.61 11 < 0.0001
```

```
##
```

```
## Details on meta-analytical method:
```

```
## - Inverse variance method
```

```
## - Restricted maximum-likelihood estimator for tau^2
```

```
## - Q-Profile method for confidence interval of tau^2 and tau
```

```
## - Trim-and-fill method to adjust for funnel plot asymmetry (L-estimator)
```

```
forest(trimfill(los_metacont),
        sortvar = TE)
```

```
## Warning in trimfill.meta(los_metacont): 9 observation(s) dropped due to missing
## values
```

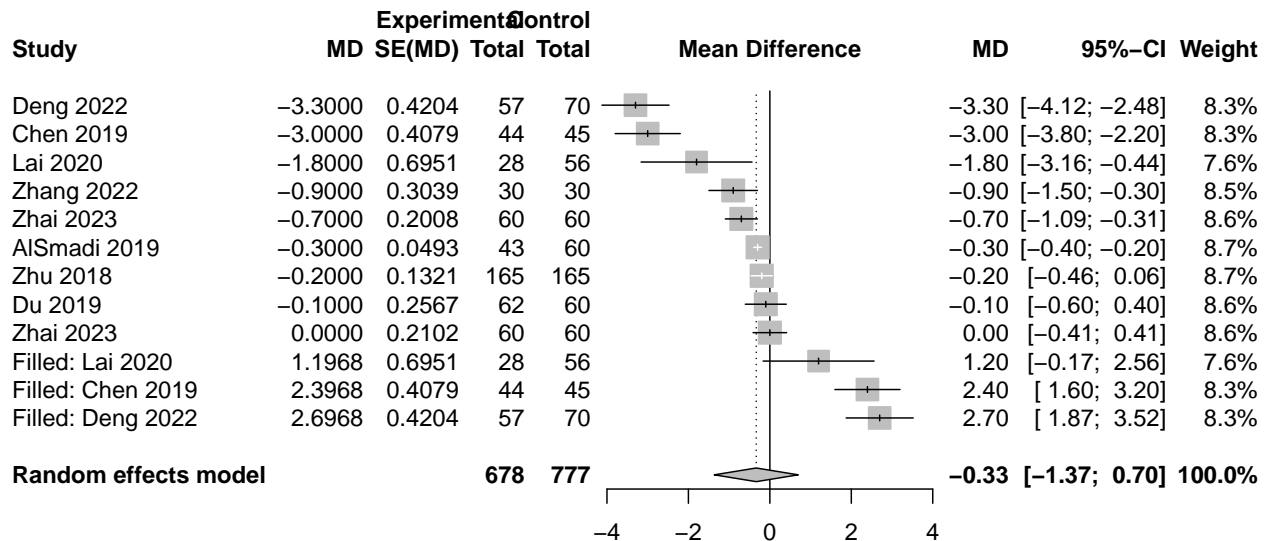

Heterogeneity:  $I^2 = 95\%$ ,  $\tau^2 = 3.1716$ ,  $p < 0.01$

#### 4.6.4 Funnel plot

```
funnel(trimfill(los_metacont))
```

```
## Warning in trimfill.meta(los_metacont): 9 observation(s) dropped due to missing  
## values
```

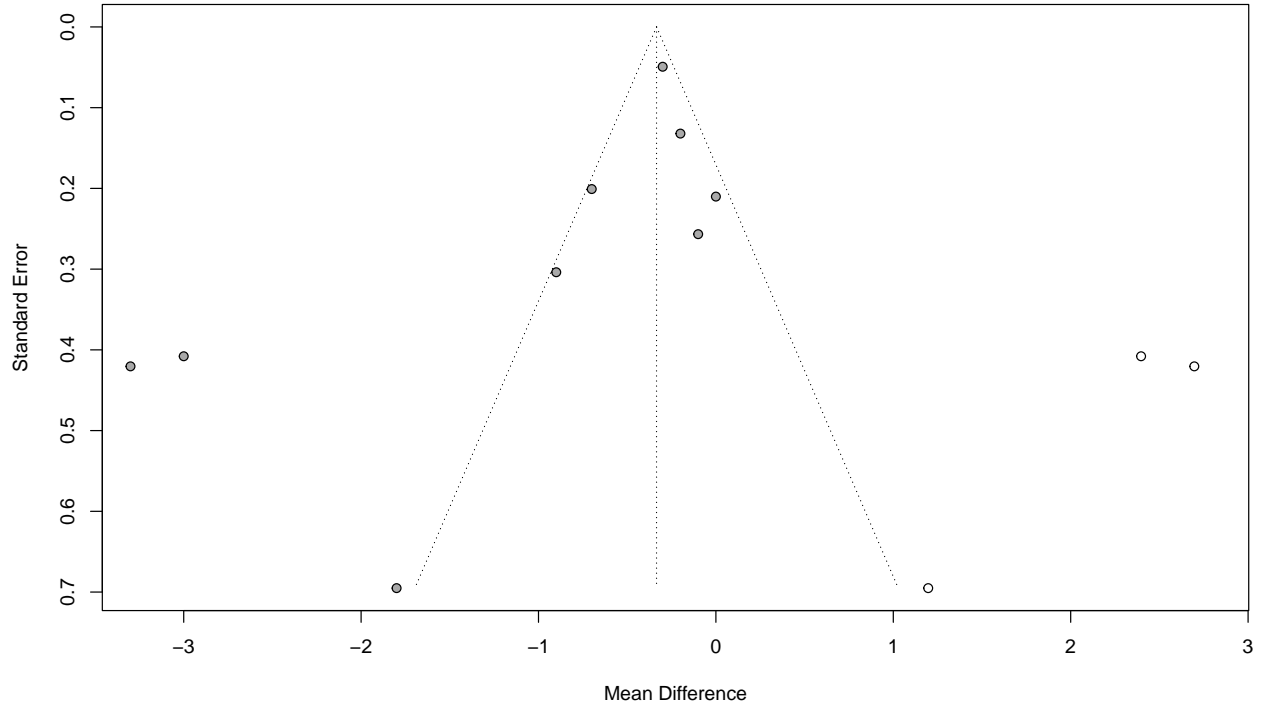

#### 4.6.5 Baujat

```
baujat(los_metacont, pos = 1)
```

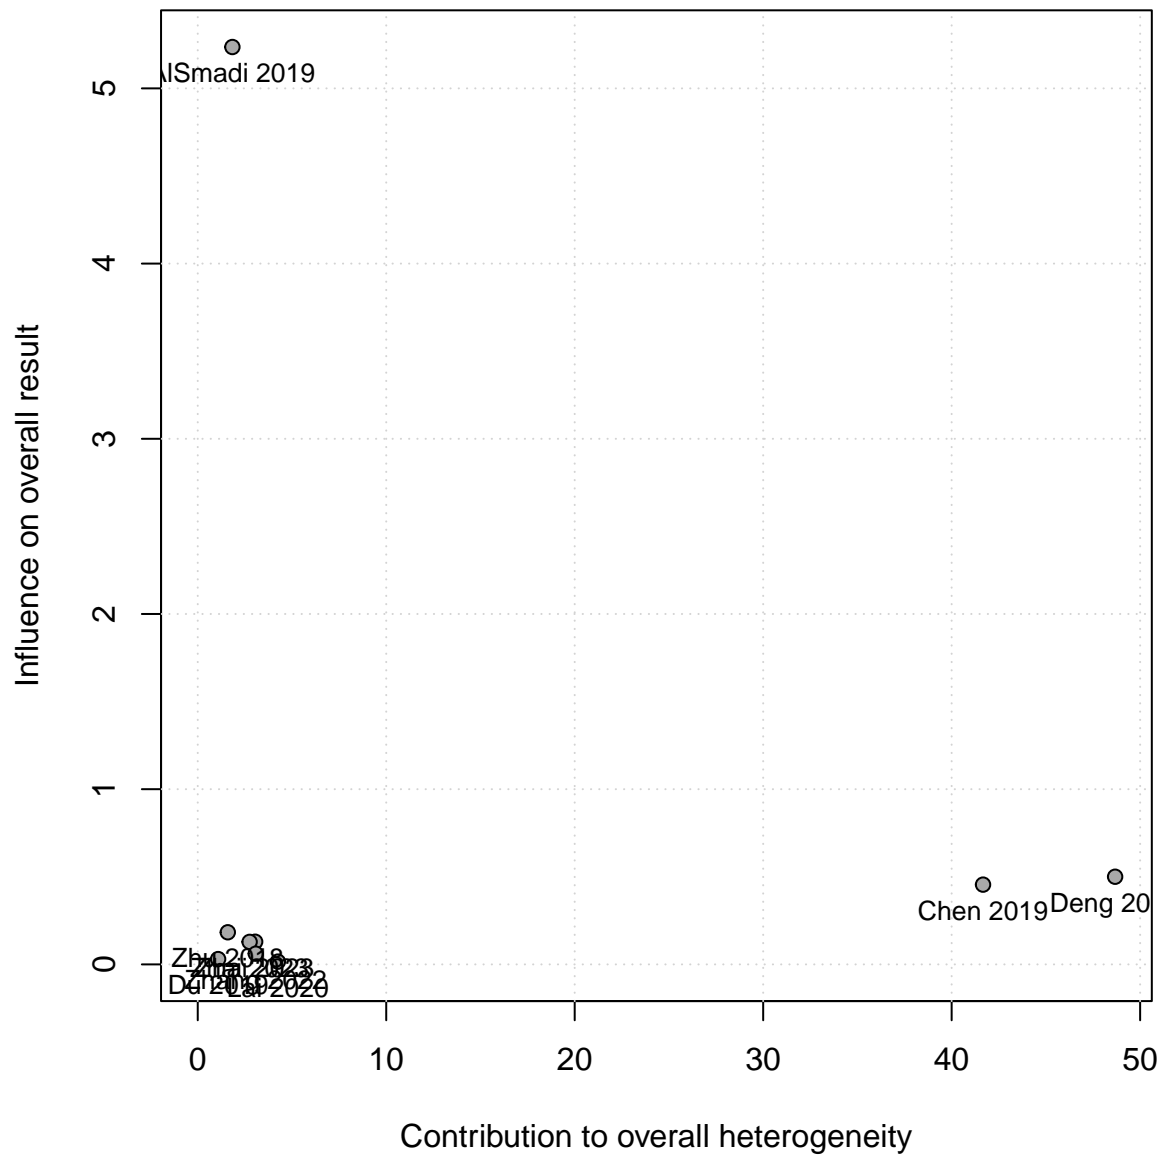



#### 4.6.6 Leave one out

```
metainf(los_metacont)
```

```
## Influential analysis (common effect model)
##
##
## MD 95%-CI p-value tau^2
## Omitting Sur 2022 -0.3668 [-0.4500; -0.2837] < 0.0001 1.4367
## Omitting Tang 2023 -0.3668 [-0.4500; -0.2837] < 0.0001 1.4367
## Omitting Chen 2019 -0.3381 [-0.4216; -0.2545] < 0.0001 1.0516
## Omitting Du 2019 -0.3743 [-0.4586; -0.2900] < 0.0001 1.5161
## Omitting Lai 2020 -0.3615 [-0.4448; -0.2782] < 0.0001 1.5628
## Omitting Zhu 2018 -0.3860 [-0.4738; -0.2982] < 0.0001 1.5445
## Omitting Zhang 2021 -0.3668 [-0.4500; -0.2837] < 0.0001 1.4367
## Omitting Zhang 2021 -0.3668 [-0.4500; -0.2837] < 0.0001 1.4367
## Omitting Lechevallier 2003 -0.3668 [-0.4500; -0.2837] < 0.0001 1.4367
## Omitting Huang 2023 -0.3668 [-0.4500; -0.2837] < 0.0001 1.4367
## Omitting Wu 2022 -0.3668 [-0.4500; -0.2837] < 0.0001 1.4367
## Omitting Ding 2023 -0.3668 [-0.4500; -0.2837] < 0.0001 1.4367
## Omitting Zhai 2023 -0.3824 [-0.4673; -0.2975] < 0.0001 1.4780
## Omitting Zhai 2023 -0.3513 [-0.4363; -0.2662] < 0.0001 1.6539
## Omitting Qian 2022 -0.3668 [-0.4500; -0.2837] < 0.0001 1.4367
## Omitting Zhang 2022 -0.3562 [-0.4402; -0.2723] < 0.0001 1.6652
## Omitting Deng 2022 -0.3367 [-0.4202; -0.2531] < 0.0001 0.8633
## Omitting AlSmadi 2019 -0.5572 [-0.7203; -0.3942] < 0.0001 1.5741
##
## Pooled estimate -0.3668 [-0.4500; -0.2837] < 0.0001 1.4367
## tau I^2
## Omitting Sur 2022 1.1986 92.6%
## Omitting Tang 2023 1.1986 92.6%
## Omitting Chen 2019 1.0255 89.4%
## Omitting Du 2019 1.2313 93.4%
## Omitting Lai 2020 1.2501 93.3%
## Omitting Zhu 2018 1.2428 93.4%
## Omitting Zhang 2021 1.1986 92.6%
## Omitting Zhang 2021 1.1986 92.6%
## Omitting Lechevallier 2003 1.1986 92.6%
## Omitting Huang 2023 1.1986 92.6%
## Omitting Wu 2022 1.1986 92.6%
## Omitting Ding 2023 1.1986 92.6%
## Omitting Zhai 2023 1.2157 93.3%
## Omitting Zhai 2023 1.2860 93.3%
## Omitting Qian 2022 1.1986 92.6%
## Omitting Zhang 2022 1.2904 93.3%
## Omitting Deng 2022 0.9292 88.1%
## Omitting AlSmadi 2019 1.2546 93.1%
##
## Pooled estimate 1.1986 92.6%
##
## Details on meta-analytical method:
## - Inverse variance method
## - Restricted maximum-likelihood estimator for tau^2
```

## 4.7 Complications - All

### 4.7.1 Meta-analysis

```
comp_metabin <- metabin(data = suction_data,  
                        event.c = complications_postop_overall_n_control,  
                        n.c = sample_size_control,  
                        event.e = complications_postop_overall_n_suction,  
                        n.e = sample_size_suction,  
                        studlab = author_year)
```

```
comp_metabin
```

```
## Number of studies: k = 17  
## Number of observations: o = 2311  
## Number of events: e = 247  
##  
##              RR          95%-CI    z p-value  
## Common effect model  0.4012 [0.3092; 0.5205] -6.88 < 0.0001  
## Random effects model 0.4353 [0.3303; 0.5736] -5.91 < 0.0001  
##  
## Quantifying heterogeneity:  
## tau^2 = 0.0095 [0.0000; 0.4976]; tau = 0.0975 [0.0000; 0.7054]  
## I^2 = 0.0% [0.0%; 51.1%]; H = 1.00 [1.00; 1.43]  
##  
## Test of heterogeneity:  
##      Q d.f. p-value  
## 15.15  16  0.5137  
##  
## Details on meta-analytical method:  
## - Mantel-Haenszel method  
## - Inverse variance method  
## - Restricted maximum-likelihood estimator for tau^2  
## - Q-Profile method for confidence interval of tau^2 and tau  
## - Continuity correction of 0.5 in studies with zero cell frequencies
```

### 4.7.2 Forest plot

```
forest(comp_metabin,
       sortvar = TE)
```

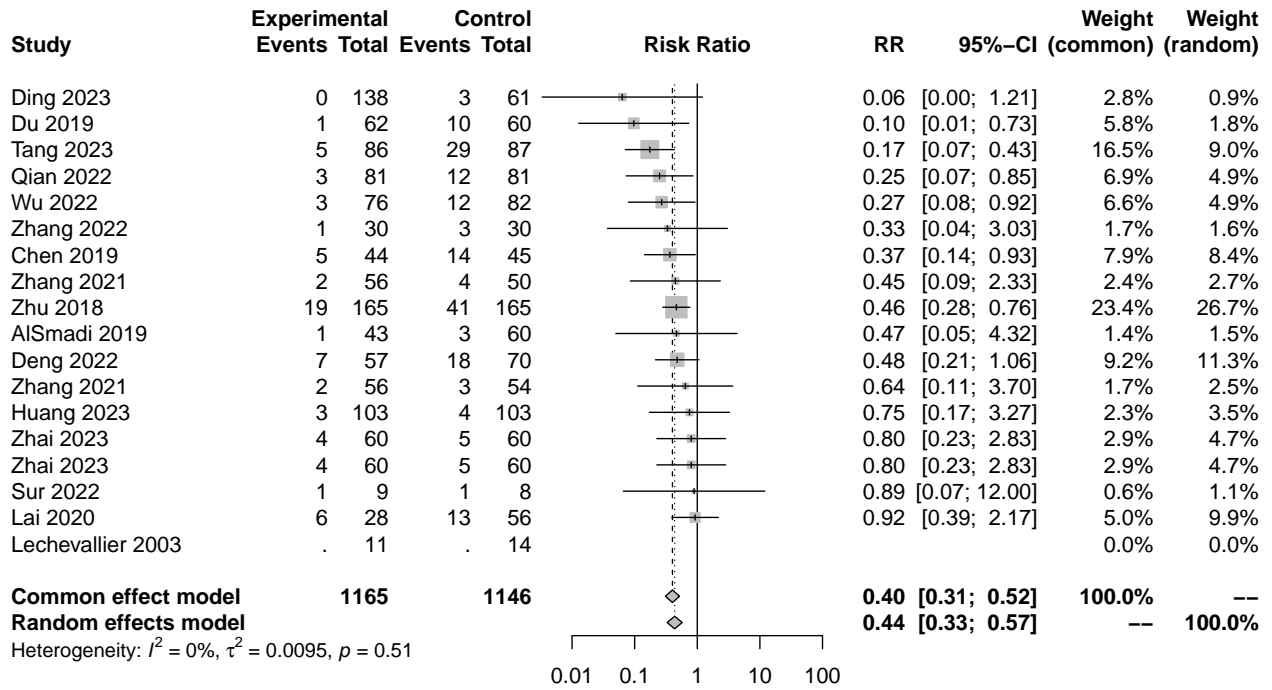

### 4.7.3 Trim and Fill

```
trimfill(comp_metabin)
```

```
## Warning in trimfill.meta(comp_metabin): 1 observation(s) dropped due to missing
## values

## Number of studies: k = 17 (with 0 added studies)
## Number of observations: o = 2286
## Number of events: e = 247
##
##                RR          95%-CI      z p-value
## Random effects model 0.4353 [0.3303; 0.5736] -5.91 < 0.0001
##
## Quantifying heterogeneity:
## tau^2 = 0.0095 [0.0000; 0.4976]; tau = 0.0975 [0.0000; 0.7054]
## I^2 = 0.0% [0.0%; 51.1%]; H = 1.00 [1.00; 1.43]
##
## Test of heterogeneity:
##      Q d.f. p-value
## 15.15  16  0.5137
##
## Details on meta-analytical method:
## - Inverse variance method
## - Restricted maximum-likelihood estimator for tau^2
## - Q-Profile method for confidence interval of tau^2 and tau
## - Trim-and-fill method to adjust for funnel plot asymmetry (L-estimator)
```

```
forest(trimfill(comp_metabin),
       sortvar = TE)
```

```
## Warning in trimfill.meta(comp_metabin): 1 observation(s) dropped due to missing
## values
```

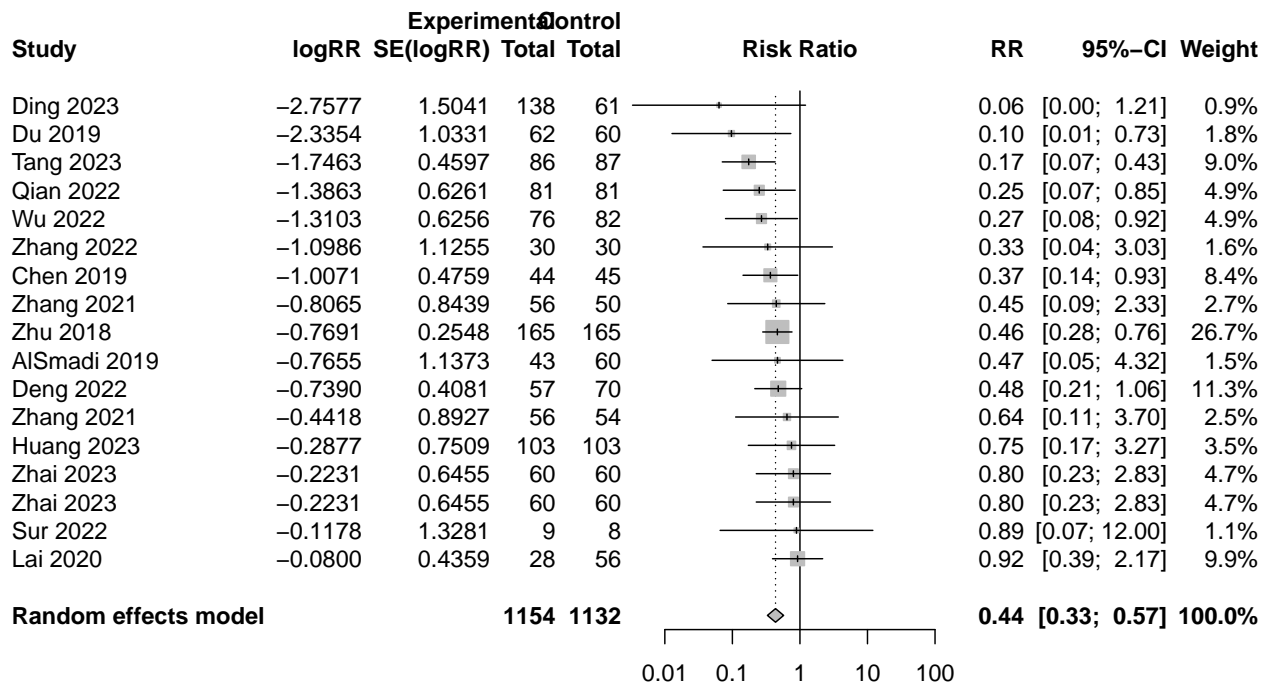

#### 4.7.4 Funnel plot

```
funnel(trimfill(comp_metabin))
```

```
## Warning in trimfill.meta(comp_metabin): 1 observation(s) dropped due to missing  
## values
```

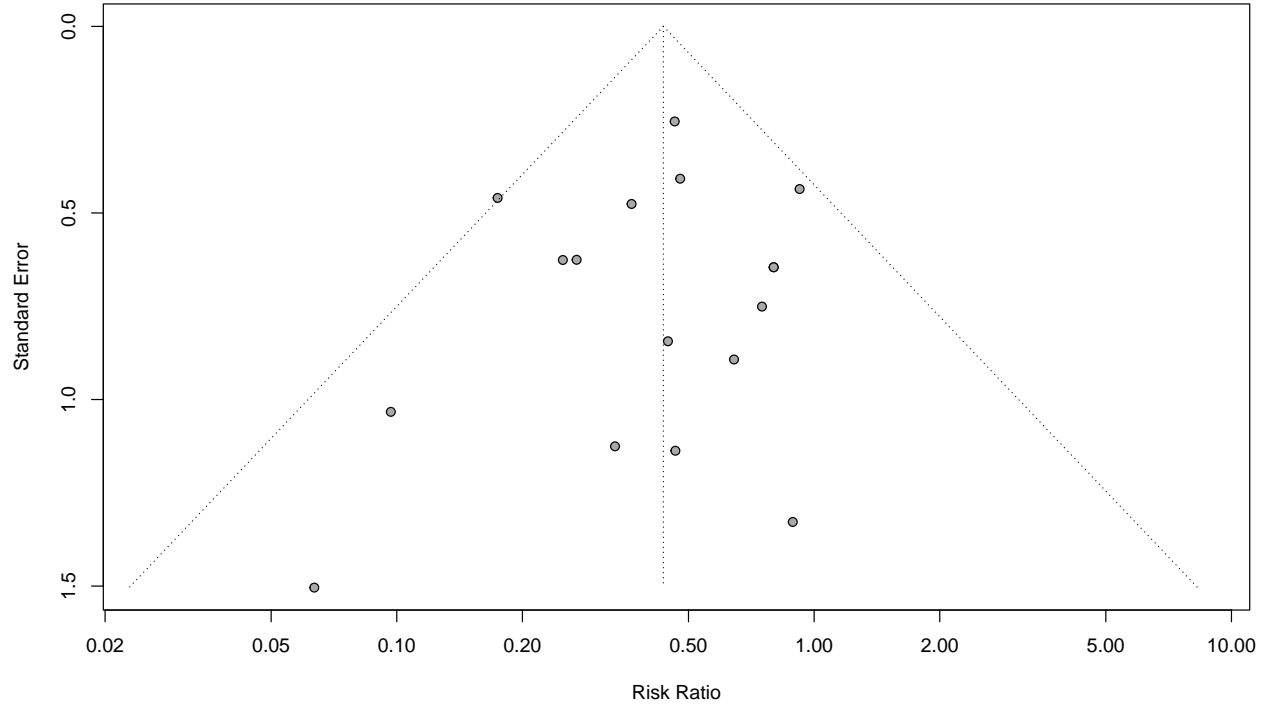

#### 4.7.5 Baujat

```
baujat(comp_metabin, pos = 1)
```

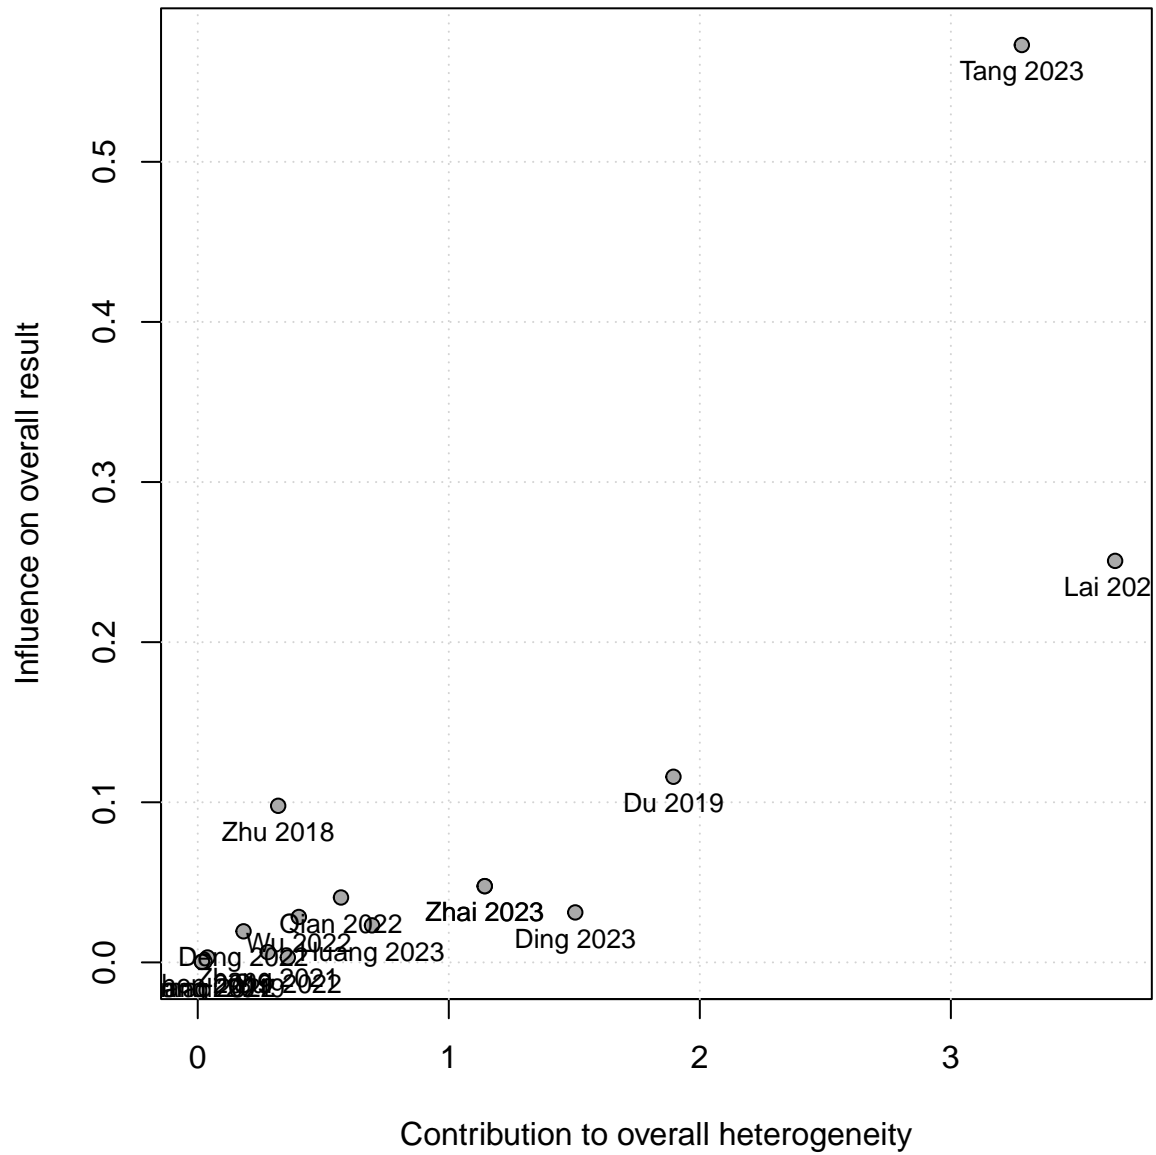

#### 4.7.6 Leave one out

```
metainf(comp_metabin)
```

```
## Influential analysis (common effect model)
##
##
##          RR          95%-CI  p-value  tau^2    tau
## Omitting Sur 2022      0.3982 [0.3065; 0.5174] < 0.0001  0.0146  0.1208
## Omitting Tang 2023     0.4459 [0.3391; 0.5865] < 0.0001  0.0000  0.0000
## Omitting Chen 2019     0.4043 [0.3083; 0.5302] < 0.0001  0.0376  0.1938
## Omitting Du 2019      0.4200 [0.3227; 0.5465] < 0.0001  0.0000  0.0000
## Omitting Lai 2020     0.3740 [0.2841; 0.4923] < 0.0001  0.0000  0.0000
## Omitting Zhu 2018     0.3821 [0.2817; 0.5184] < 0.0001  0.0760  0.2757
## Omitting Zhang 2021   0.4001 [0.3074; 0.5207] < 0.0001  0.0215  0.1467
## Omitting Zhang 2021   0.3969 [0.3050; 0.5165] < 0.0001  0.0201  0.1417
## Omitting Lechevallier 2003 0.4012 [0.3092; 0.5205] < 0.0001  0.0095  0.0975
## Omitting Huang 2023   0.3930 [0.3016; 0.5122] < 0.0001  0.0208  0.1444
## Omitting Wu 2022     0.4105 [0.3145; 0.5358] < 0.0001  0.0151  0.1230
## Omitting Ding 2023   0.4108 [0.3160; 0.5341] < 0.0001  0.0052  0.0719
## Omitting Zhai 2023   0.3894 [0.2983; 0.5085] < 0.0001  0.0187  0.1368
## Omitting Zhai 2023   0.3894 [0.2983; 0.5085] < 0.0001  0.0187  0.1368
## Omitting Qian 2022   0.4123 [0.3158; 0.5383] < 0.0001  0.0105  0.1023
## Omitting Zhang 2022   0.4024 [0.3096; 0.5230] < 0.0001  0.0151  0.1230
## Omitting Deng 2022   0.3934 [0.2987; 0.5181] < 0.0001  0.0521  0.2282
## Omitting AlSmadi 2019 0.4003 [0.3080; 0.5202] < 0.0001  0.0162  0.1273
##
## Pooled estimate      0.4012 [0.3092; 0.5205] < 0.0001  0.0095  0.0975
##
##          I^2
## Omitting Sur 2022      0.0%
## Omitting Tang 2023     0.0%
## Omitting Chen 2019     0.0%
## Omitting Du 2019      0.0%
## Omitting Lai 2020     0.0%
## Omitting Zhu 2018     0.5%
## Omitting Zhang 2021   1.0%
## Omitting Zhang 2021   0.0%
## Omitting Lechevallier 2003 0.0%
## Omitting Huang 2023   0.0%
## Omitting Wu 2022     0.0%
## Omitting Ding 2023   0.0%
## Omitting Zhai 2023   0.0%
## Omitting Zhai 2023   0.0%
## Omitting Qian 2022   0.0%
## Omitting Zhang 2022   0.6%
## Omitting Deng 2022   0.6%
## Omitting AlSmadi 2019 1.0%
##
## Pooled estimate      0.0%
##
## Details on meta-analytical method:
## - Mantel-Haenszel method
## - Restricted maximum-likelihood estimator for tau^2
```

## 4.8 Fever

### 4.8.1 Meta-analysis

```
fever_metabin <- metabin(data = suction_data,
                        event.c = fever_n_control,
                        n.c = sample_size_control,
                        event.e = fever_n_suction,
                        n.e = sample_size_suction,
                        studlab = author_year)

fever_metabin

## Number of studies: k = 13
## Number of observations: o = 2311
## Number of events: e = 129
##
##              RR          95%-CI      z p-value
## Common effect model 0.4058 [0.2814; 0.5852] -4.83 < 0.0001
## Random effects model 0.4371 [0.2985; 0.6402] -4.25 < 0.0001
##
## Quantifying heterogeneity:
## tau^2 = 0 [0.0000; 0.8333]; tau = 0 [0.0000; 0.9129]
## I^2 = 0.0% [0.0%; 56.6%]; H = 1.00 [1.00; 1.52]
##
## Test of heterogeneity:
##      Q d.f. p-value
## 9.84  12  0.6299
##
## Details on meta-analytical method:
## - Mantel-Haenszel method
## - Inverse variance method
## - Restricted maximum-likelihood estimator for tau^2
## - Q-Profile method for confidence interval of tau^2 and tau
## - Continuity correction of 0.5 in studies with zero cell frequencies
```



## 4.8.2 Forest plot

```
forest(fever_metabin,
      sortvar = TE)
```

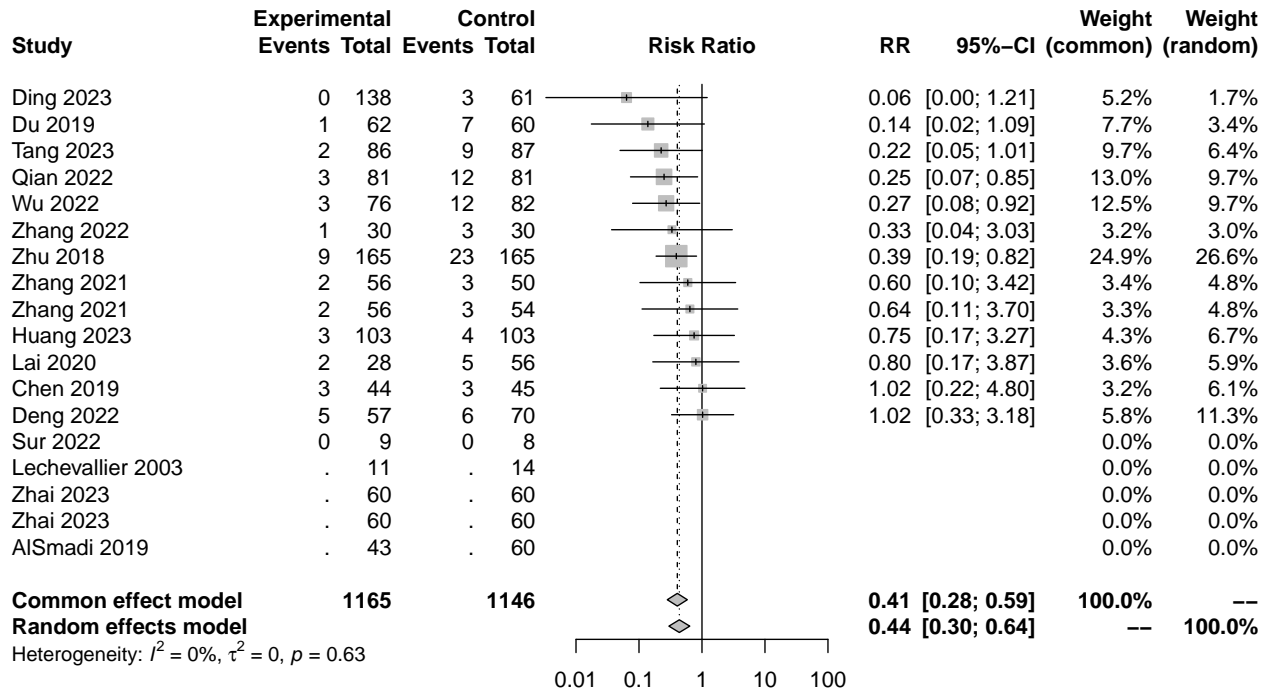

### 4.8.3 Trim and Fill

```
trimfill(fever_metabin)
```

```
## Warning in trimfill.meta(fever_metabin): 5 observation(s) dropped due to
## missing values

## Number of studies: k = 14 (with 1 added studies)
## Number of observations: o = 2125
## Number of events: e = 132
##
##                RR          95%-CI      z p-value
## Random effects model 0.4517 [0.3094; 0.6595] -4.12 < 0.0001
##
## Quantifying heterogeneity:
## tau^2 < 0.0001 [0.0000; 1.0892]; tau = 0.0025 [0.0000; 1.0436]
## I^2 = 0.0% [0.0%; 55.0%]; H = 1.00 [1.00; 1.49]
##
## Test of heterogeneity:
##      Q d.f. p-value
## 11.57  13  0.5630
##
## Details on meta-analytical method:
## - Inverse variance method
## - Restricted maximum-likelihood estimator for tau^2
## - Q-Profile method for confidence interval of tau^2 and tau
## - Trim-and-fill method to adjust for funnel plot asymmetry (L-estimator)
```

```
forest(trimfill(fever_metabin),
       sortvar = TE)
```

```
## Warning in trimfill.meta(fever_metabin): 5 observation(s) dropped due to
## missing values
```

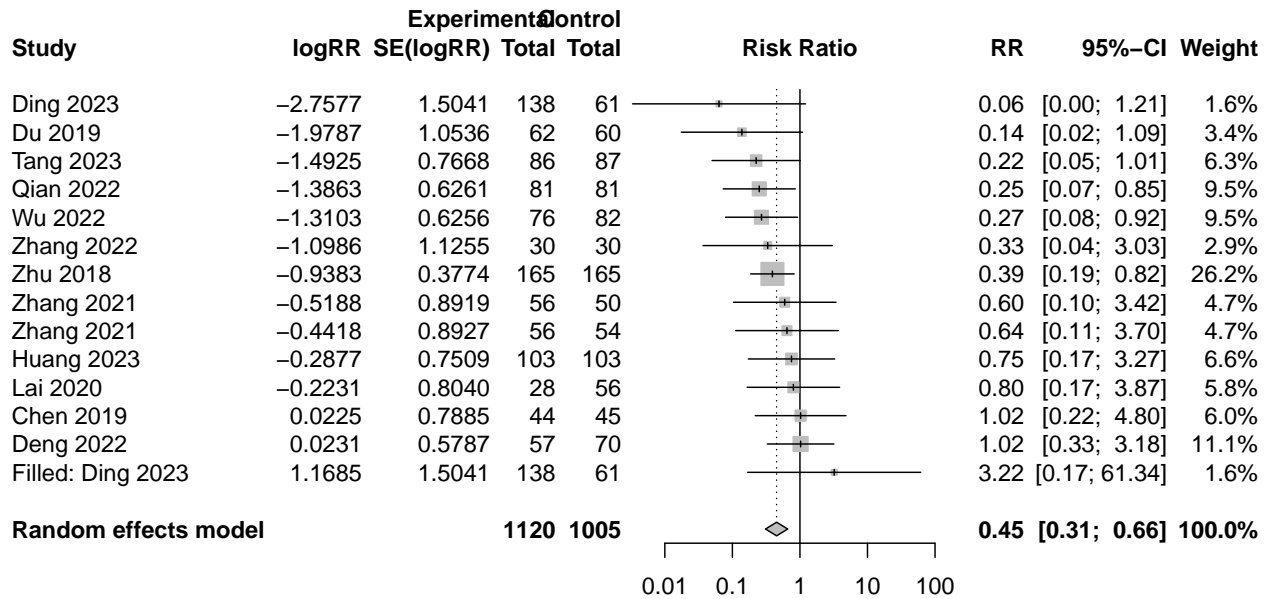

#### 4.8.4 Funnel plot

```
funnel(trimfill(fever_metabin))
```

```
## Warning in trimfill.meta(fever_metabin): 5 observation(s) dropped due to  
## missing values
```

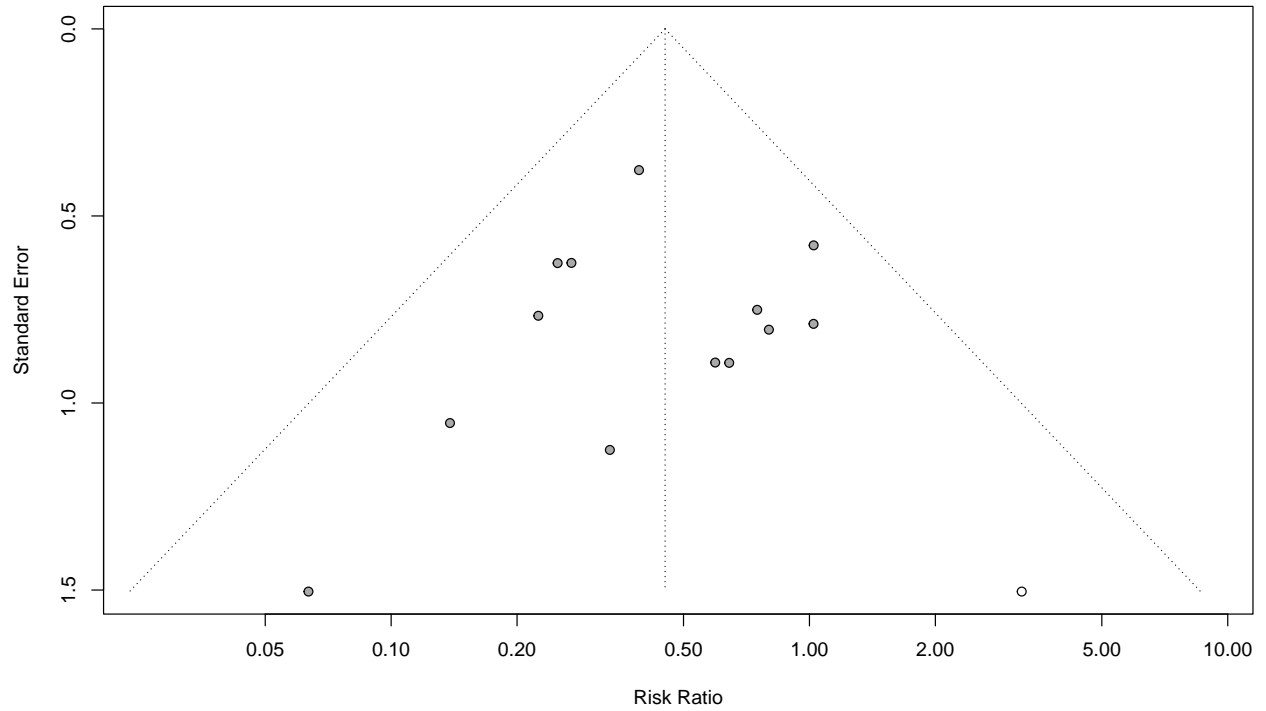

#### 4.8.5 Baujat

```
baujat(fever_metabin, pos = 1)
```

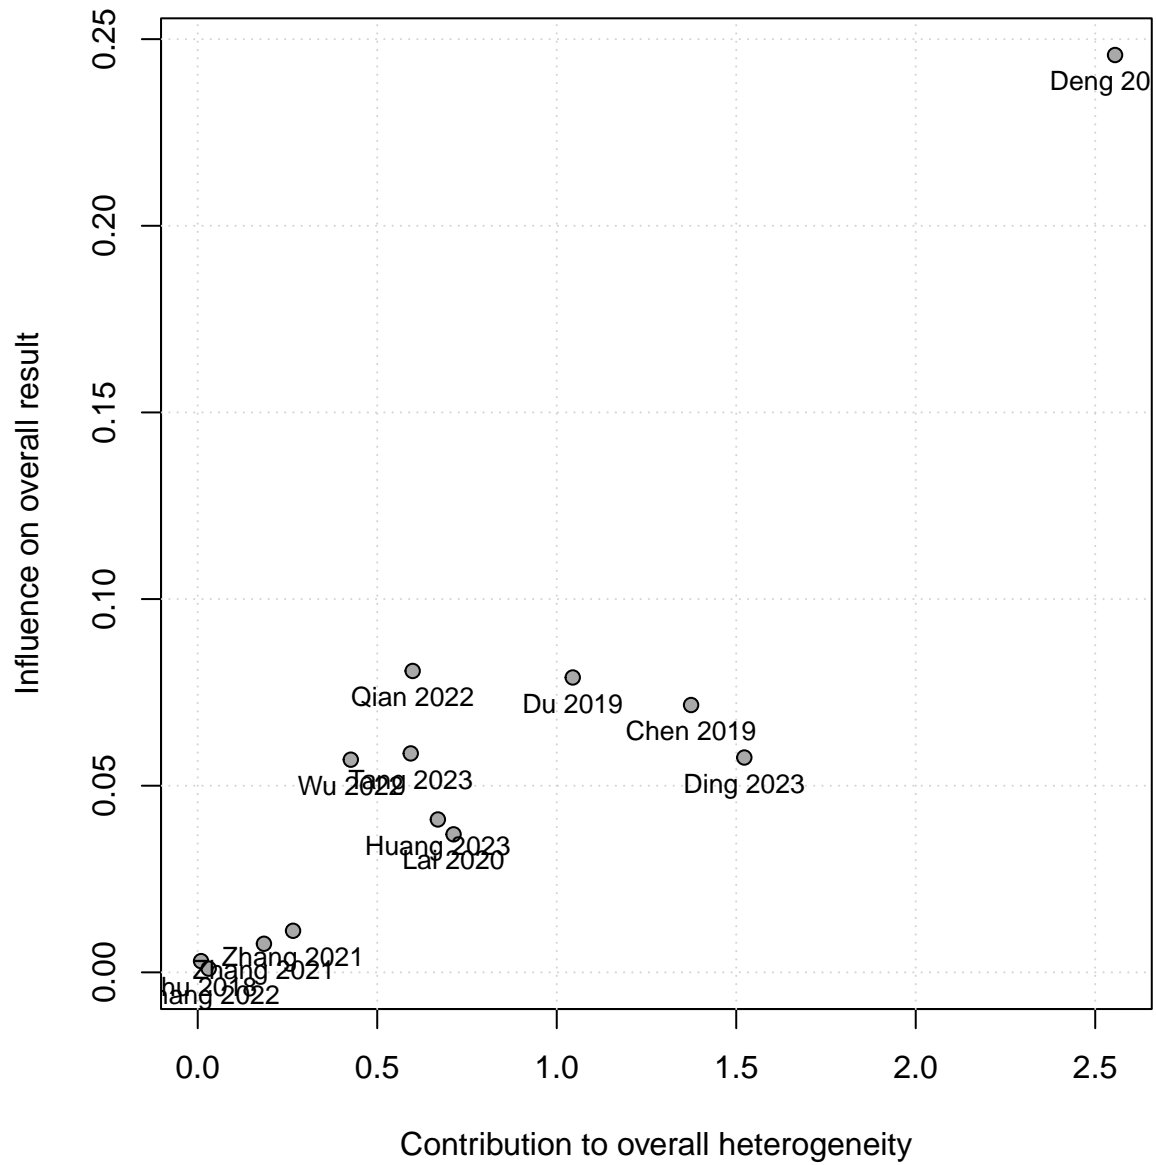

#### 4.8.6 Leave one out

```
metainf(fever_metabin)
```

```
## Influential analysis (common effect model)
##
##          RR          95%-CI  p-value  tau^2    tau
## Omitting Sur 2022      0.4058 [0.2814; 0.5852] < 0.0001  0.0000  0.0000
## Omitting Tang 2023     0.4252 [0.2913; 0.6207] < 0.0001  0.0000  0.0000
## Omitting Chen 2019     0.3853 [0.2638; 0.5630] < 0.0001  0.0000  0.0000
## Omitting Du 2019      0.4281 [0.2947; 0.6221] < 0.0001  0.0000  0.0000
## Omitting Lai 2020     0.3911 [0.2681; 0.5705] < 0.0001  0.0000  0.0000
## Omitting Zhu 2018     0.4106 [0.2694; 0.6258] < 0.0001  0.0000  0.0000
## Omitting Zhang 2021   0.3991 [0.2744; 0.5805] < 0.0001  0.0000  0.0000
## Omitting Zhang 2021   0.3977 [0.2734; 0.5786] < 0.0001  0.0000  0.0000
## Omitting Lechevallier 2003 0.4058 [0.2814; 0.5852] < 0.0001  0.0000  0.0000
## Omitting Huang 2023   0.3902 [0.2671; 0.5702] < 0.0001  0.0000  0.0000
## Omitting Wu 2022     0.4253 [0.2896; 0.6245] < 0.0001  0.0000  0.0000
## Omitting Ding 2023    0.4247 [0.2927; 0.6163] < 0.0001  0.0000  0.0000
## Omitting Zhai 2023    0.4058 [0.2814; 0.5852] < 0.0001  0.0000  0.0000
## Omitting Zhai 2023    0.4058 [0.2814; 0.5852] < 0.0001  0.0000  0.0000
## Omitting Qian 2022    0.4291 [0.2921; 0.6303] < 0.0001  0.0000  0.0000
## Omitting Zhang 2022   0.4082 [0.2816; 0.5918] < 0.0001  0.0000  0.0019
## Omitting Deng 2022    0.3676 [0.2485; 0.5436] < 0.0001  0.0000  0.0000
## Omitting AlSmadi 2019 0.4058 [0.2814; 0.5852] < 0.0001  0.0000  0.0000
##
## Pooled estimate      0.4058 [0.2814; 0.5852] < 0.0001  0.0000  0.0000
##          I^2
## Omitting Sur 2022      0.0%
## Omitting Tang 2023     0.0%
## Omitting Chen 2019     0.0%
## Omitting Du 2019      0.0%
## Omitting Lai 2020     0.0%
## Omitting Zhu 2018     0.0%
## Omitting Zhang 2021   0.0%
## Omitting Zhang 2021   0.0%
## Omitting Lechevallier 2003 0.0%
## Omitting Huang 2023   0.0%
## Omitting Wu 2022     0.0%
## Omitting Ding 2023    0.0%
## Omitting Zhai 2023    0.0%
## Omitting Zhai 2023    0.0%
## Omitting Qian 2022    0.0%
## Omitting Zhang 2022   0.0%
## Omitting Deng 2022    0.0%
## Omitting AlSmadi 2019 0.0%
##
## Pooled estimate      0.0%
##
## Details on meta-analytical method:
## - Mantel-Haenszel method
## - Restricted maximum-likelihood estimator for tau^2
```

## 4.9 Infections

### 4.9.1 Meta-analysis

```
infection_metabin <- metabin(data = suction_data,
                             event.c = infection_n_control,
                             n.c = sample_size_control,
                             event.e = infection_n_suction,
                             n.e = sample_size_suction,
                             studlab = author_year)

infection_metabin

## Number of studies: k = 14
## Number of observations: o = 2311
## Number of events: e = 126
##
##              RR          95%-CI      z p-value
## Common effect model 0.3983 [0.2754; 0.5762] -4.89 < 0.0001
## Random effects model 0.4285 [0.2916; 0.6296] -4.32 < 0.0001
##
## Quantifying heterogeneity:
## tau^2 = 0 [0.0000; 0.6581]; tau = 0 [0.0000; 0.8113]
## I^2 = 0.0% [0.0%; 55.0%]; H = 1.00 [1.00; 1.49]
##
## Test of heterogeneity:
##      Q d.f. p-value
## 9.80  13  0.7103
##
## Details on meta-analytical method:
## - Mantel-Haenszel method
## - Inverse variance method
## - Restricted maximum-likelihood estimator for tau^2
## - Q-Profile method for confidence interval of tau^2 and tau
## - Continuity correction of 0.5 in studies with zero cell frequencies
```

## 4.9.2 Forest plot

```
forest(infection_metabin,
       sortvar = TE)
```

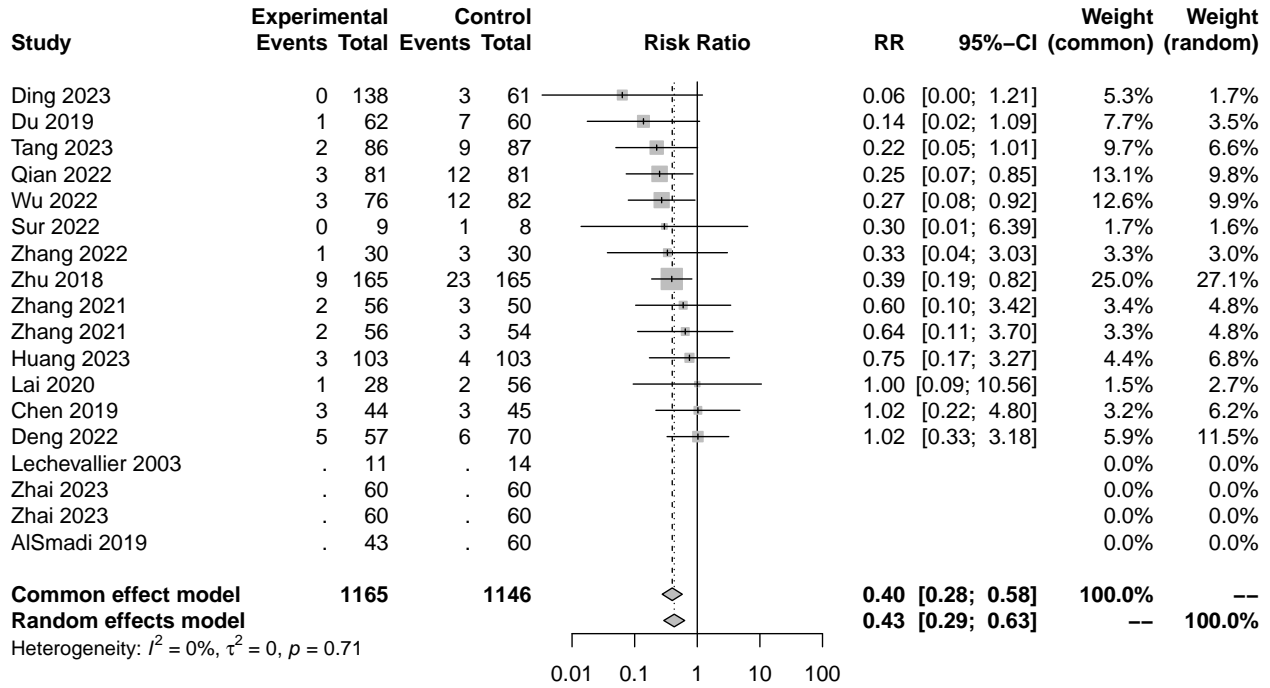

### 4.9.3 Trim and Fill

```
trimfill(infection_metabin)
```

```
## Warning in trimfill.meta(infection_metabin): 4 observation(s) dropped due to
## missing values
```

```
## Number of studies: k = 15 (with 1 added studies)
## Number of observations: o = 2142
## Number of events: e = 129
##
##                      RR          95%-CI      z p-value
## Random effects model 0.4429 [0.3024; 0.6487] -4.18 < 0.0001
##
## Quantifying heterogeneity:
## tau^2 = 0 [0.0000; 0.8711]; tau = 0 [0.0000; 0.9333]
## I^2 = 0.0% [0.0%; 53.6%]; H = 1.00 [1.00; 1.47]
##
## Test of heterogeneity:
##      Q d.f. p-value
## 11.50  14  0.6467
##
## Details on meta-analytical method:
## - Inverse variance method
## - Restricted maximum-likelihood estimator for tau^2
## - Q-Profile method for confidence interval of tau^2 and tau
## - Trim-and-fill method to adjust for funnel plot asymmetry (L-estimator)
```

```
forest(trimfill(infection_metabin),
        sortvar = TE)
```

```
## Warning in trimfill.meta(infection_metabin): 4 observation(s) dropped due to
## missing values
```

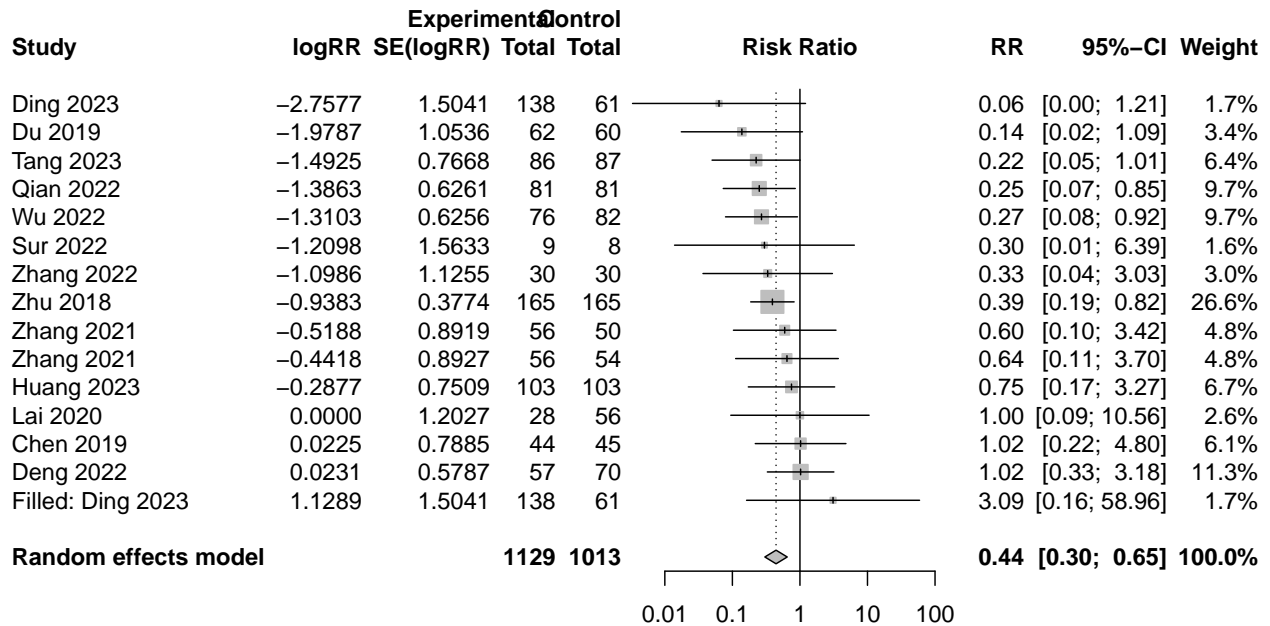

Heterogeneity:  $I^2 = 0\%$ ,  $\tau^2 = 0$ ,  $p = 0.65$



#### 4.9.4 Funnel plot

```
funnel(trimfill(infection_metabin))
```

```
## Warning in trimfill.meta(infection_metabin): 4 observation(s) dropped due to  
## missing values
```

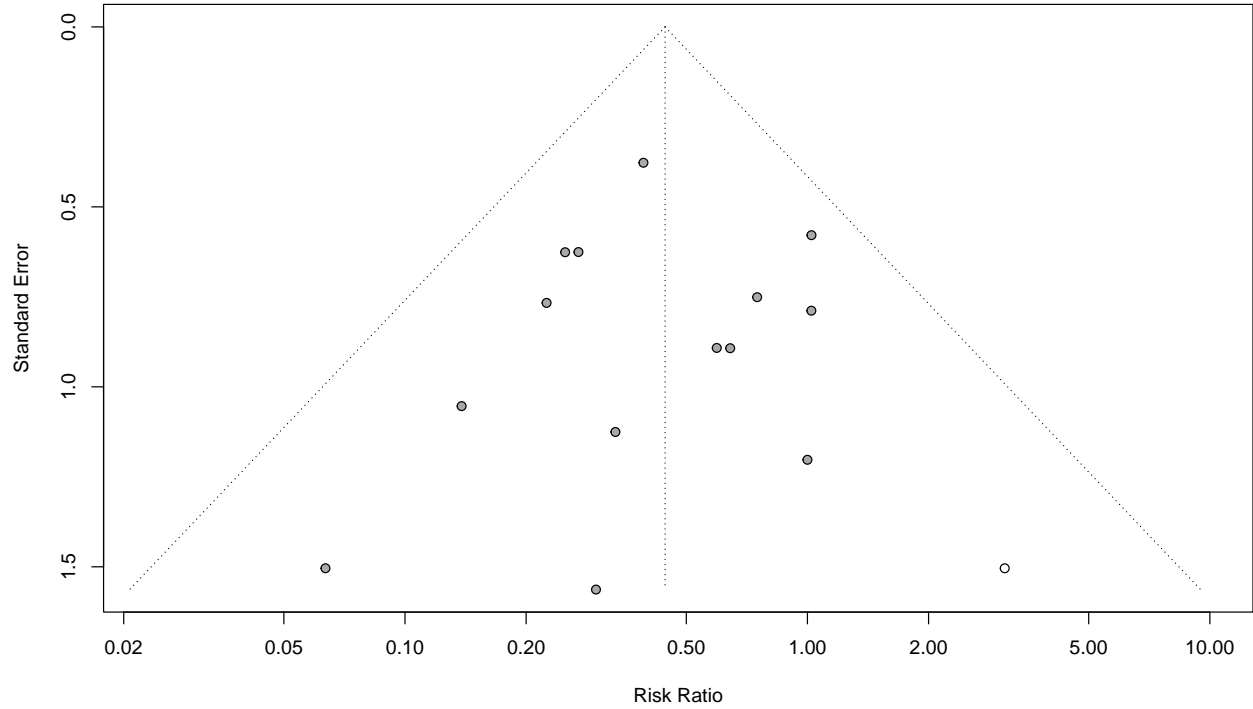

#### 4.9.5 Baujat

```
baujat(infection_metabin, pos = 1)
```

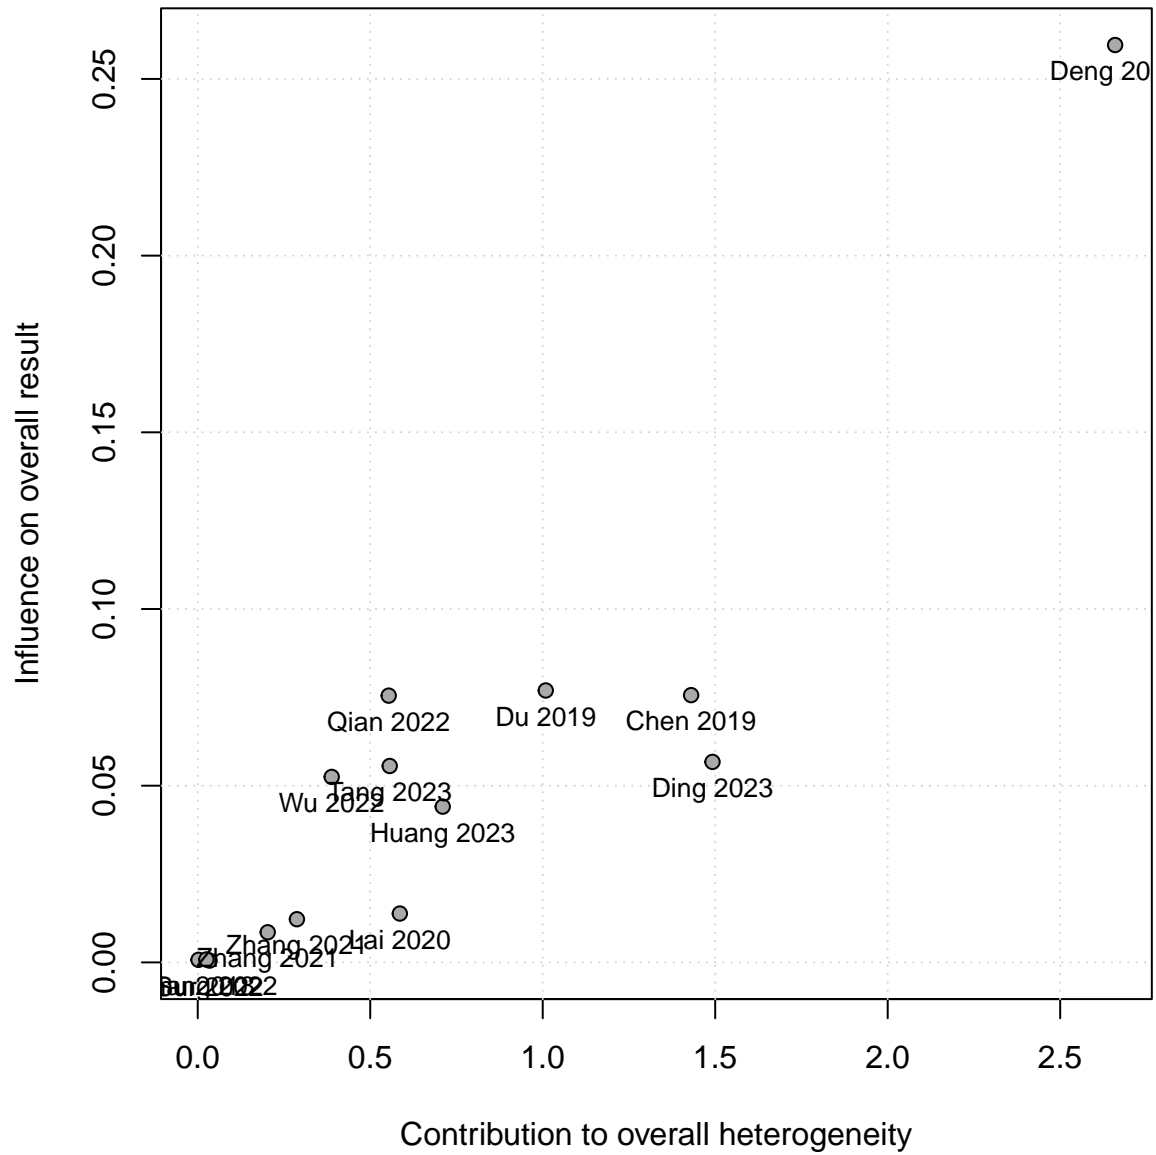

#### 4.9.6 Leave one out

```
metainf(infection_metabin)
```

```
## Influential analysis (common effect model)
##
##           RR           95%-CI  p-value  tau^2    tau
## Omitting Sur 2022      0.4000 [0.2758; 0.5803] < 0.0001  0.0000  0.0000
## Omitting Tang 2023     0.4170 [0.2847; 0.6108] < 0.0001  0.0000  0.0000
## Omitting Chen 2019     0.3775 [0.2575; 0.5534] < 0.0001  0.0000  0.0000
## Omitting Du 2019       0.4201 [0.2883; 0.6124] < 0.0001  0.0000  0.0000
## Omitting Lai 2020      0.3895 [0.2677; 0.5665] < 0.0001  0.0000  0.0000
## Omitting Zhu 2018      0.4007 [0.2617; 0.6135] < 0.0001  0.0000  0.0000
## Omitting Zhang 2021    0.3913 [0.2681; 0.5710] < 0.0001  0.0000  0.0000
## Omitting Zhang 2021    0.3899 [0.2671; 0.5691] < 0.0001  0.0000  0.0000
## Omitting Lechevallier 2003 0.3983 [0.2754; 0.5762] < 0.0001  0.0000  0.0000
## Omitting Huang 2023    0.3823 [0.2608; 0.5605] < 0.0001  0.0000  0.0000
## Omitting Wu 2022       0.4168 [0.2829; 0.6142] < 0.0001  0.0000  0.0000
## Omitting Ding 2023     0.4169 [0.2864; 0.6069] < 0.0001  0.0000  0.0000
## Omitting Zhai 2023     0.3983 [0.2754; 0.5762] < 0.0001  0.0000  0.0000
## Omitting Zhai 2023     0.3983 [0.2754; 0.5762] < 0.0001  0.0000  0.0000
## Omitting Qian 2022     0.4206 [0.2853; 0.6200] < 0.0001  0.0000  0.0000
## Omitting Zhang 2022    0.4005 [0.2754; 0.5824] < 0.0001  0.0000  0.0000
## Omitting Deng 2022     0.3594 [0.2421; 0.5337] < 0.0001  0.0000  0.0000
## Omitting AlSmadi 2019  0.3983 [0.2754; 0.5762] < 0.0001  0.0000  0.0000
##
## Pooled estimate      0.3983 [0.2754; 0.5762] < 0.0001  0.0000  0.0000
##           I^2
## Omitting Sur 2022      0.0%
## Omitting Tang 2023     0.0%
## Omitting Chen 2019     0.0%
## Omitting Du 2019       0.0%
## Omitting Lai 2020      0.0%
## Omitting Zhu 2018      0.0%
## Omitting Zhang 2021    0.0%
## Omitting Zhang 2021    0.0%
## Omitting Lechevallier 2003 0.0%
## Omitting Huang 2023    0.0%
## Omitting Wu 2022       0.0%
## Omitting Ding 2023     0.0%
## Omitting Zhai 2023     0.0%
## Omitting Zhai 2023     0.0%
## Omitting Qian 2022     0.0%
## Omitting Zhang 2022    0.0%
## Omitting Deng 2022     0.0%
## Omitting AlSmadi 2019  0.0%
##
## Pooled estimate      0.0%
##
## Details on meta-analytical method:
## - Mantel-Haenszel method
## - Restricted maximum-likelihood estimator for tau^2
```

## 4.10 Sepsis

### 4.10.1 Meta-analysis

```
sepsis_metabin <- metabin(data = suction_data,
                          event.c = sepsis_n_control,
                          n.c = sample_size_control,
                          event.e = sepsis_n_suction,
                          n.e = sample_size_suction,
                          studlab = author_year)

sepsis_metabin

## Number of studies: k = 2
## Number of observations: o = 2311
## Number of events: e = 18
##
##
##          RR          95%-CI      z p-value
## Common effect model  0.2264 [0.0719; 0.7124] -2.54  0.0111
## Random effects model 0.2371 [0.0747; 0.7524] -2.44  0.0146
##
## Quantifying heterogeneity:
## tau^2 = 0; tau = 0; I^2 = 0.0%; H = 1.00
##
## Test of heterogeneity:
##      Q d.f. p-value
## 0.30  1  0.5833
##
## Details on meta-analytical method:
## - Mantel-Haenszel method
## - Inverse variance method
## - Restricted maximum-likelihood estimator for tau^2
## - Continuity correction of 0.5 in studies with zero cell frequencies
```

#### 4.10.2 Forest plot

```
forest(sepsis_metabin,
       sortvar = TE)
```

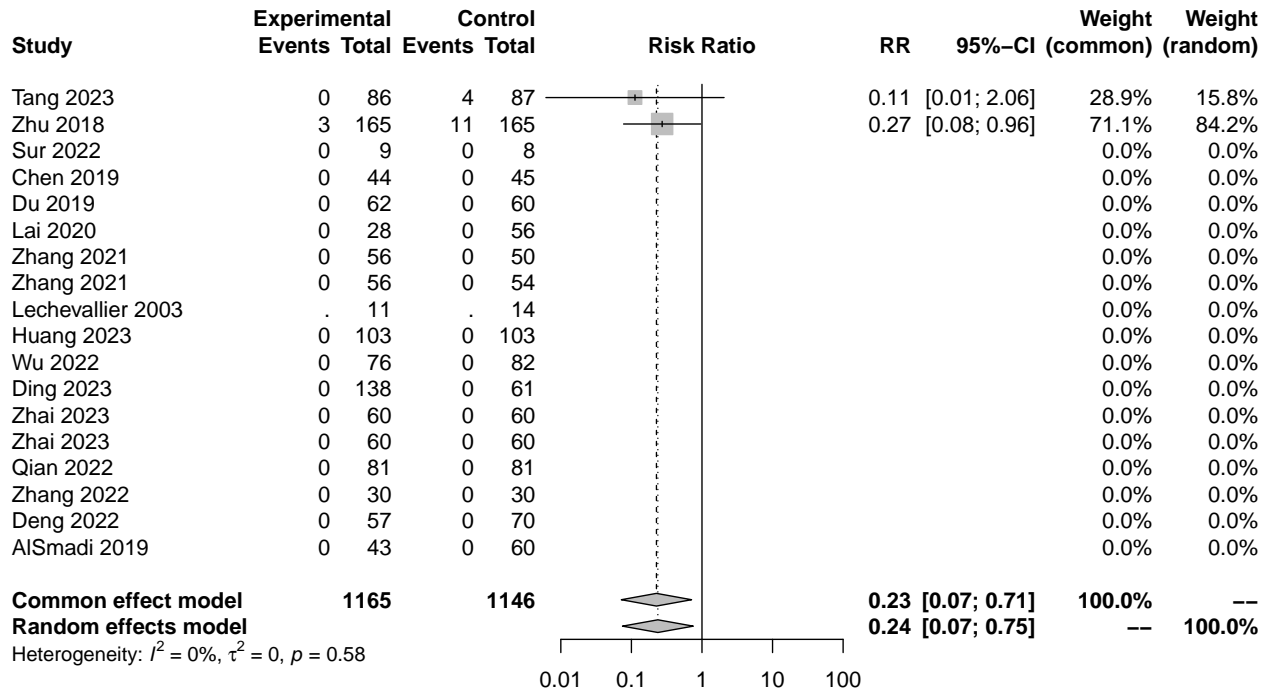

### 4.10.3 Trim and Fill

```
#trimfill(sepsis_metabin)  
#forest(trimfill(sepsis_metabin),  
#      sortvar = TE)
```

#### 4.10.4 Funnel plot

```
funnel((sepsis_metabin))
```

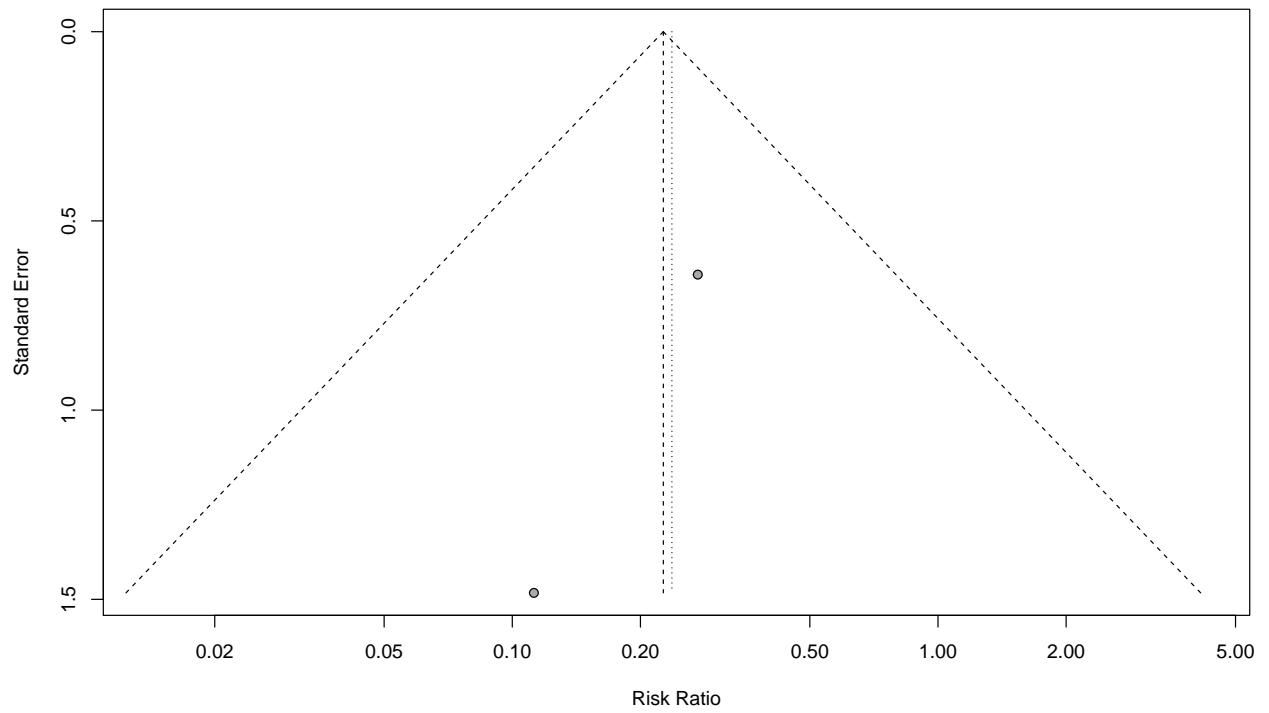

#### 4.10.5 Baujat

```
baujat(sepsis_metabin, pos = 1)
```

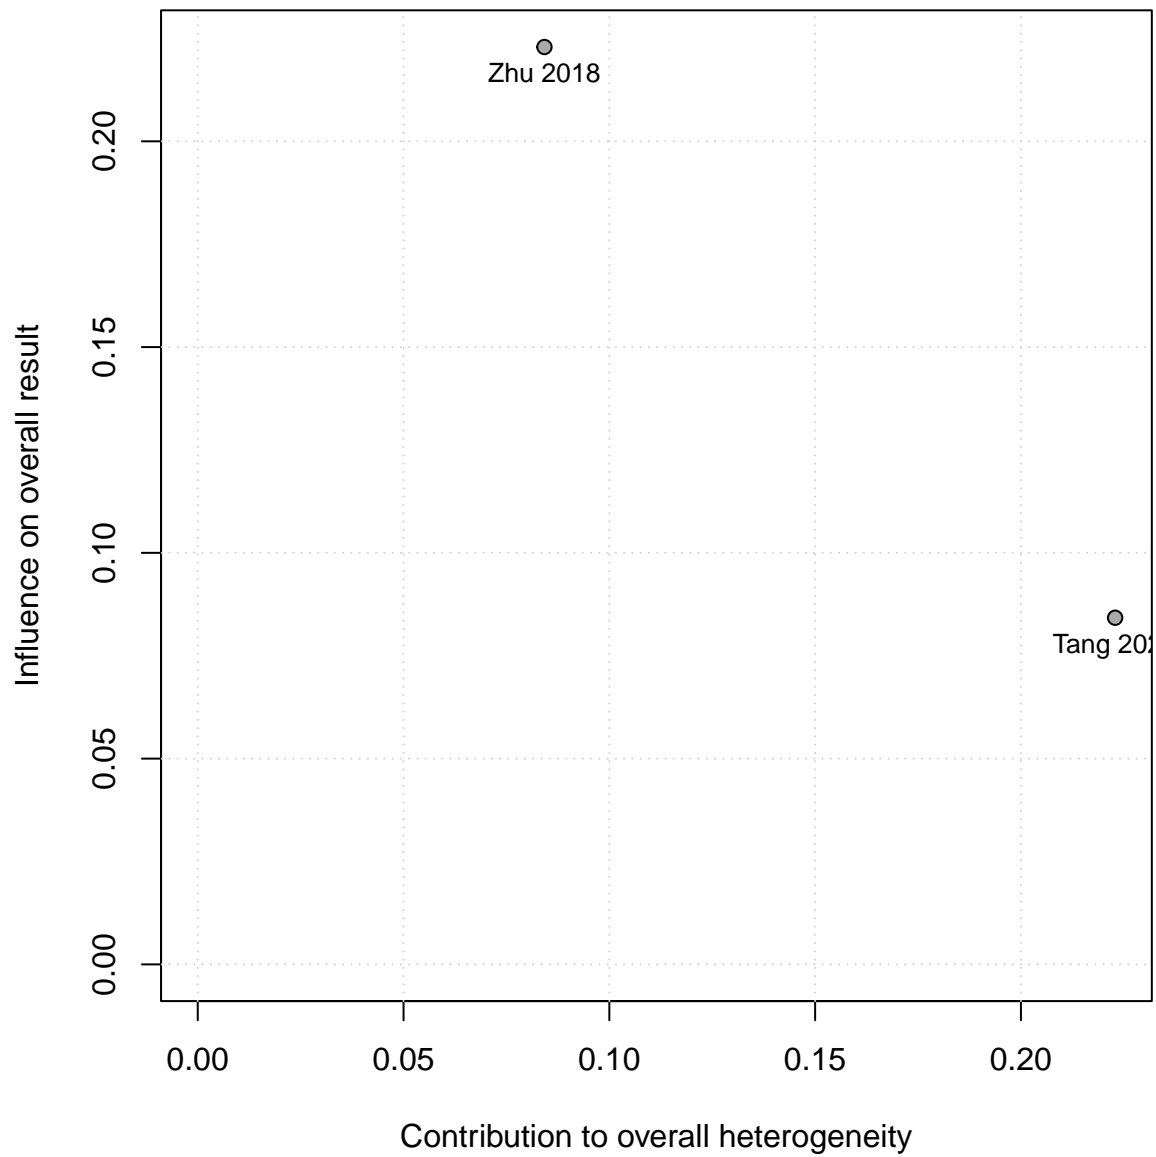



#### 4.10.6 Leave one out

```
metainf(sepsis_metabin)
```

```
## Influential analysis (common effect model)
##
##           RR           95%-CI p-value   tau^2   tau
## Omitting Sur 2022      0.2264 [0.0719; 0.7124] 0.0111 0.0000 0.0000
## Omitting Tang 2023      0.2727 [0.0775; 0.9598] 0.0430
## Omitting Chen 2019      0.2264 [0.0719; 0.7124] 0.0111 0.0000 0.0000
## Omitting Du 2019        0.2264 [0.0719; 0.7124] 0.0111 0.0000 0.0000
## Omitting Lai 2020       0.2264 [0.0719; 0.7124] 0.0111 0.0000 0.0000
## Omitting Zhu 2018       0.1124 [0.0061; 2.0562] 0.1405
## Omitting Zhang 2021     0.2264 [0.0719; 0.7124] 0.0111 0.0000 0.0000
## Omitting Zhang 2021     0.2264 [0.0719; 0.7124] 0.0111 0.0000 0.0000
## Omitting Lechevallier 2003 0.2264 [0.0719; 0.7124] 0.0111 0.0000 0.0000
## Omitting Huang 2023     0.2264 [0.0719; 0.7124] 0.0111 0.0000 0.0000
## Omitting Wu 2022        0.2264 [0.0719; 0.7124] 0.0111 0.0000 0.0000
## Omitting Ding 2023      0.2264 [0.0719; 0.7124] 0.0111 0.0000 0.0000
## Omitting Zhai 2023      0.2264 [0.0719; 0.7124] 0.0111 0.0000 0.0000
## Omitting Zhai 2023      0.2264 [0.0719; 0.7124] 0.0111 0.0000 0.0000
## Omitting Qian 2022      0.2264 [0.0719; 0.7124] 0.0111 0.0000 0.0000
## Omitting Zhang 2022     0.2264 [0.0719; 0.7124] 0.0111 0.0000 0.0000
## Omitting Deng 2022      0.2264 [0.0719; 0.7124] 0.0111 0.0000 0.0000
## Omitting AlSmadi 2019   0.2264 [0.0719; 0.7124] 0.0111 0.0000 0.0000
##
## Pooled estimate      0.2264 [0.0719; 0.7124] 0.0111 0.0000 0.0000
##           I^2
## Omitting Sur 2022      0.0%
## Omitting Tang 2023      0.0%
## Omitting Chen 2019     0.0%
## Omitting Du 2019       0.0%
## Omitting Lai 2020      0.0%
## Omitting Zhu 2018      0.0%
## Omitting Zhang 2021    0.0%
## Omitting Zhang 2021    0.0%
## Omitting Lechevallier 2003 0.0%
## Omitting Huang 2023    0.0%
## Omitting Wu 2022       0.0%
## Omitting Ding 2023     0.0%
## Omitting Zhai 2023     0.0%
## Omitting Zhai 2023     0.0%
## Omitting Qian 2022     0.0%
## Omitting Zhang 2022    0.0%
## Omitting Deng 2022     0.0%
## Omitting AlSmadi 2019  0.0%
##
## Pooled estimate      0.0%
##
## Details on meta-analytical method:
## - Mantel-Haenszel method
## - Restricted maximum-likelihood estimator for tau^2
```

## 4.11 Abscess

### 4.11.1 Meta-analysis

```
abscess_metabin <- metabin(data = suction_data,
                           event.c = abscess_n_control,
                           n.c = sample_size_control,
                           event.e = abscess_n_suction,
                           n.e = sample_size_suction,
                           studlab = author_year)

abscess_metabin

## Number of studies: k = 0
## Number of observations: o = 2311
## Number of events: e = 0
##
##                RR 95%-CI  z p-value
## Common effect model  NA      --      --
## Random effects model NA      --      --
##
## Quantifying heterogeneity:
## tau^2 = NA; tau = NA; I^2 = NA; H = NA
##
## Details on meta-analytical method:
## - Mantel-Haenszel method
## - Inverse variance method
## - Restricted maximum-likelihood estimator for tau^2
```

#### 4.11.2 Forest plot

```
forest(abscess_metabin,
       sortvar = TE)
```

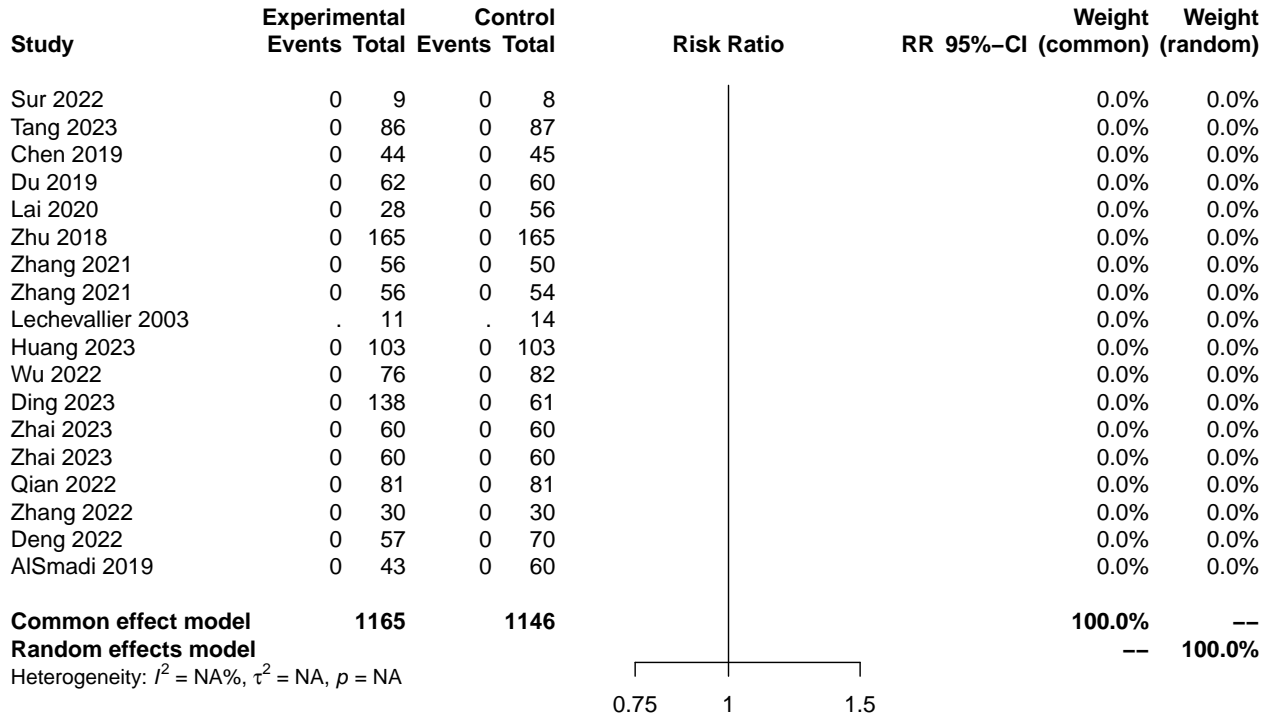

### 4.11.3 Trim and Fill

```
#trimfill(abscess_metabin)  
#forest(trimfill(abscess_metabin),  
#      sortvar = TE)
```

#### 4.11.4 Funnel plot

```
#funnel((abscess_metabin))
```

#### 4.11.5 Baujat

```
#baujat(abscess_metabin, pos = 1)
```

#### 4.11.6 Leave one out

```
#metainf(abscess_metabin)
```

## 4.12 Haematoma

### 4.12.1 Meta-analysis

```
haematoma_metabin <- metabin(data = suction_data,
                             event.c = hematoma_n_control,
                             n.c = sample_size_control,
                             event.e = hematoma_n_suction,
                             n.e = sample_size_suction,
                             studlab = author_year)

haematoma_metabin

## Number of studies: k = 1
## Number of observations: o = 2311
## Number of events: e = 1
##
##              RR          95%-CI      z p-value
## Common effect model 0.4080 [0.0169; 9.8294] -0.55 0.5808
## Random effects model 0.4087 [0.0170; 9.8436] -0.55 0.5815
##
## Quantifying heterogeneity:
## tau^2 = NA; tau = NA; I^2 = NA; H = NA
##
## Details on meta-analytical method:
## - Mantel-Haenszel method
## - Inverse variance method
## - Restricted maximum-likelihood estimator for tau^2
## - Continuity correction of 0.5 in studies with zero cell frequencies
```



### 4.12.2 Forest plot

```
forest(haematoma_metabin,
       sortvar = TE)
```

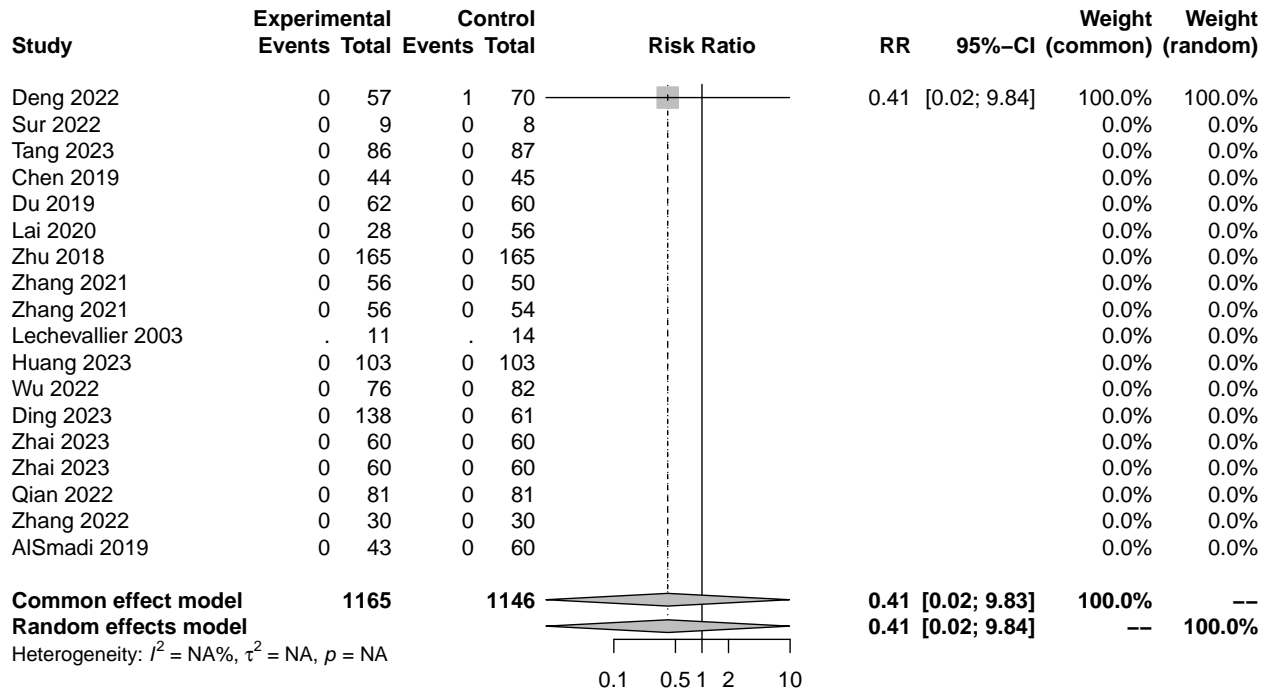

### 4.12.3 Trim and Fill

```
#trimfill(haematoma_metabin)  
#forest(trimfill(haematoma_metabin),  
#      sortvar = TE)
```

#### 4.12.4 Funnel plot

```
funnel((haematoma_metabin))
```

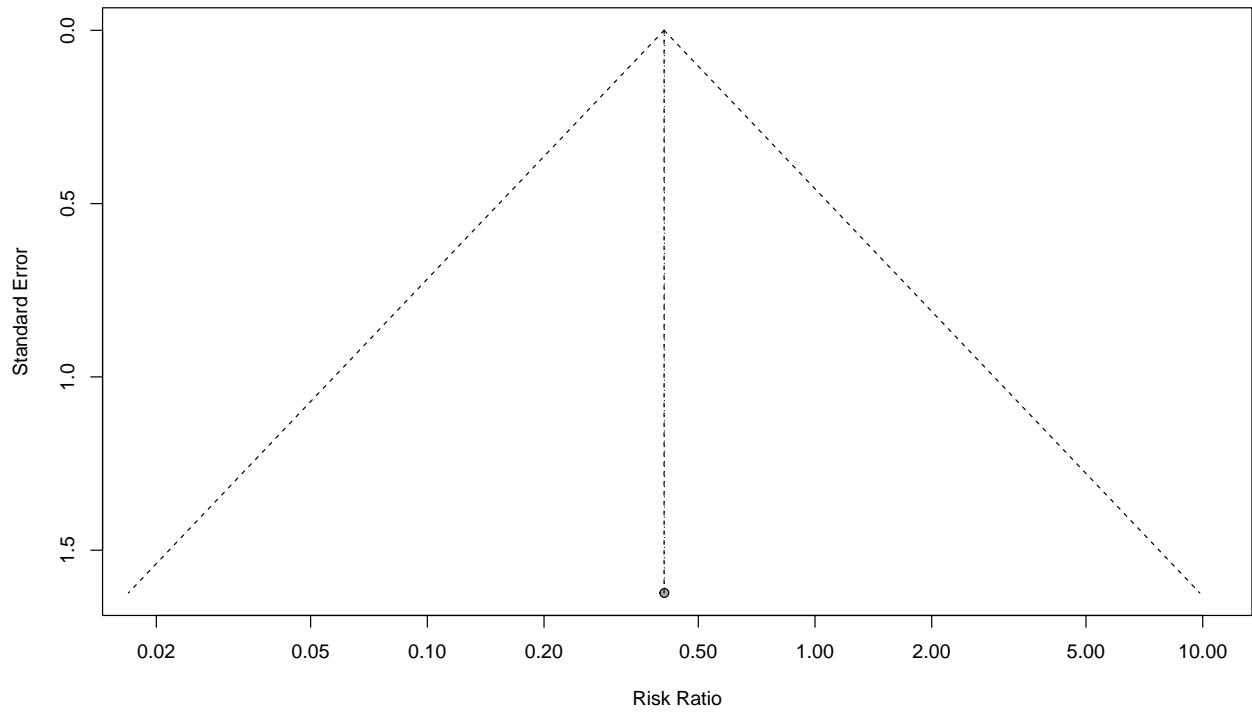

#### 4.12.5 Baujat

```
baujat(haematoma_metabin, pos = 1)
```

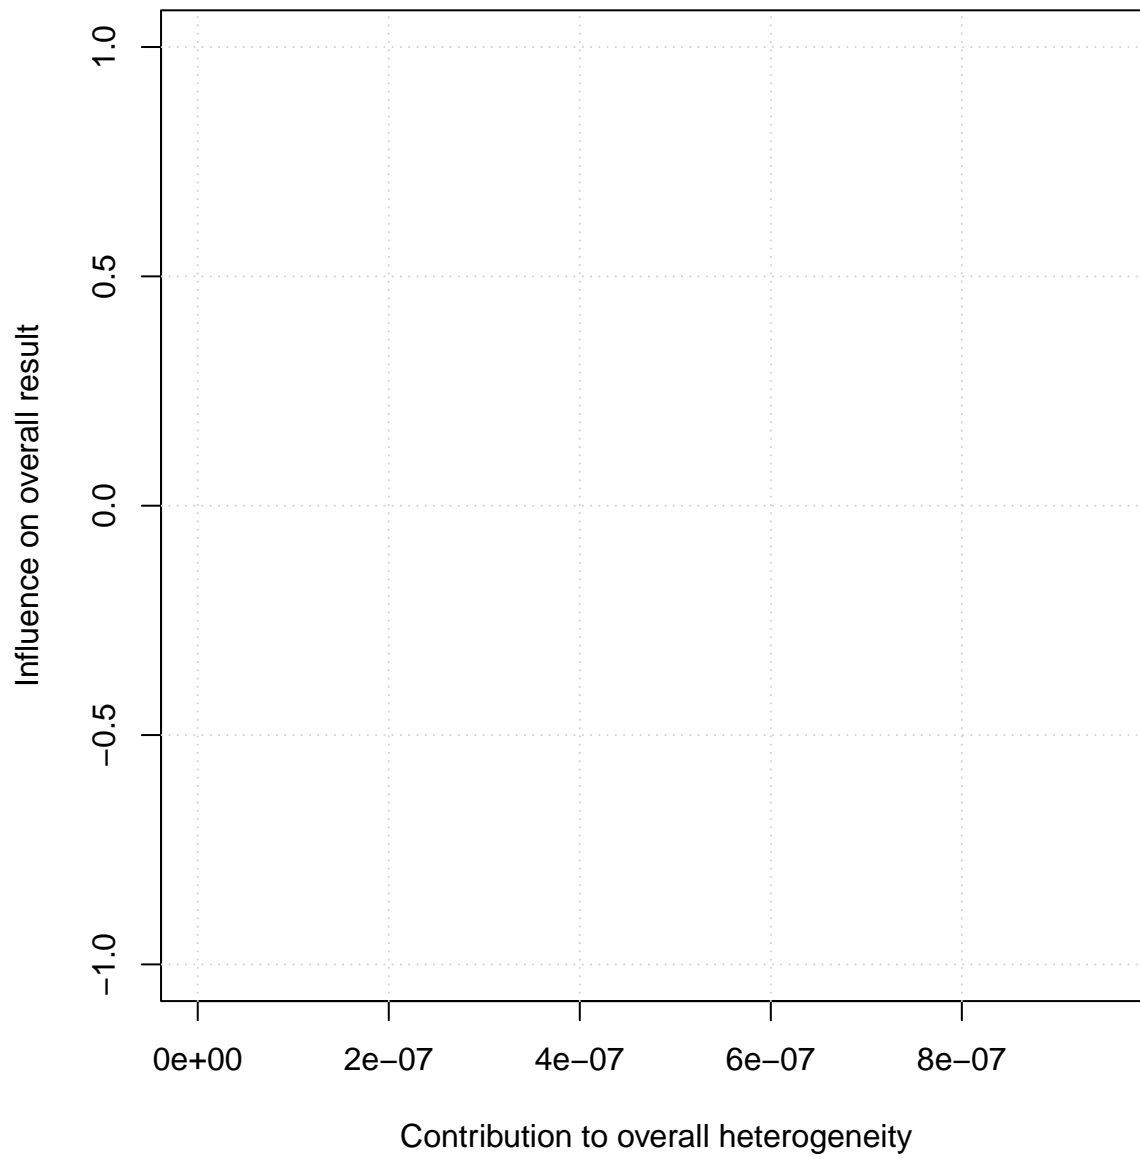

#### 4.12.6 Leave one out

```
metainf(haematoma_metabin)
```

```
## Influential analysis (common effect model)
##
##
##          RR          95%-CI p-value tau^2 tau I^2
## Omitting Sur 2022      0.4080 [0.0169; 9.8294] 0.5808
## Omitting Tang 2023     0.4080 [0.0169; 9.8294] 0.5808
## Omitting Chen 2019     0.4080 [0.0169; 9.8294] 0.5808
## Omitting Du 2019       0.4080 [0.0169; 9.8294] 0.5808
## Omitting Lai 2020      0.4080 [0.0169; 9.8294] 0.5808
## Omitting Zhu 2018      0.4080 [0.0169; 9.8294] 0.5808
## Omitting Zhang 2021    0.4080 [0.0169; 9.8294] 0.5808
## Omitting Zhang 2021    0.4080 [0.0169; 9.8294] 0.5808
## Omitting Lechevallier 2003 0.4080 [0.0169; 9.8294] 0.5808
## Omitting Huang 2023    0.4080 [0.0169; 9.8294] 0.5808
## Omitting Wu 2022       0.4080 [0.0169; 9.8294] 0.5808
## Omitting Ding 2023     0.4080 [0.0169; 9.8294] 0.5808
## Omitting Zhai 2023     0.4080 [0.0169; 9.8294] 0.5808
## Omitting Zhai 2023     0.4080 [0.0169; 9.8294] 0.5808
## Omitting Qian 2022     0.4080 [0.0169; 9.8294] 0.5808
## Omitting Zhang 2022    0.4080 [0.0169; 9.8294] 0.5808
## Omitting Deng 2022     0.4080 [0.0169; 9.8294] 0.5808
## Omitting AlSmadi 2019  0.4080 [0.0169; 9.8294] 0.5808
##
## Pooled estimate      0.4080 [0.0169; 9.8294] 0.5808
##
## Details on meta-analytical method:
## - Mantel-Haenszel method
## - Restricted maximum-likelihood estimator for tau^2
```

## 4.13 Pain

### 4.13.1 Meta-analysis

```
pain_metabin <- metabin(data = suction_data,
                        event.c = pain_n_control,
                        n.c = sample_size_control,
                        event.e = pain_n_suction,
                        n.e = sample_size_suction,
                        studlab = author_year)

pain_metabin

## Number of studies: k = 3
## Number of observations: o = 2311
## Number of events: e = 25
##
##              RR          95%-CI      z p-value
## Common effect model 0.2103 [0.0780; 0.5670] -3.08 0.0021
## Random effects model 0.2180 [0.0804; 0.5913] -2.99 0.0028
##
## Quantifying heterogeneity:
## tau^2 = 0 [0.0000; 4.5123]; tau = 0 [0.0000; 2.1242]
## I^2 = 0.0% [0.0%; 89.6%]; H = 1.00 [1.00; 3.10]
##
## Test of heterogeneity:
##      Q d.f. p-value
## 0.39  2 0.8246
##
## Details on meta-analytical method:
## - Mantel-Haenszel method
## - Inverse variance method
## - Restricted maximum-likelihood estimator for tau^2
## - Q-Profile method for confidence interval of tau^2 and tau
## - Continuity correction of 0.5 in studies with zero cell frequencies
```

### 4.13.2 Forest plot

```
forest(pain_metabin,
       sortvar = TE)
```

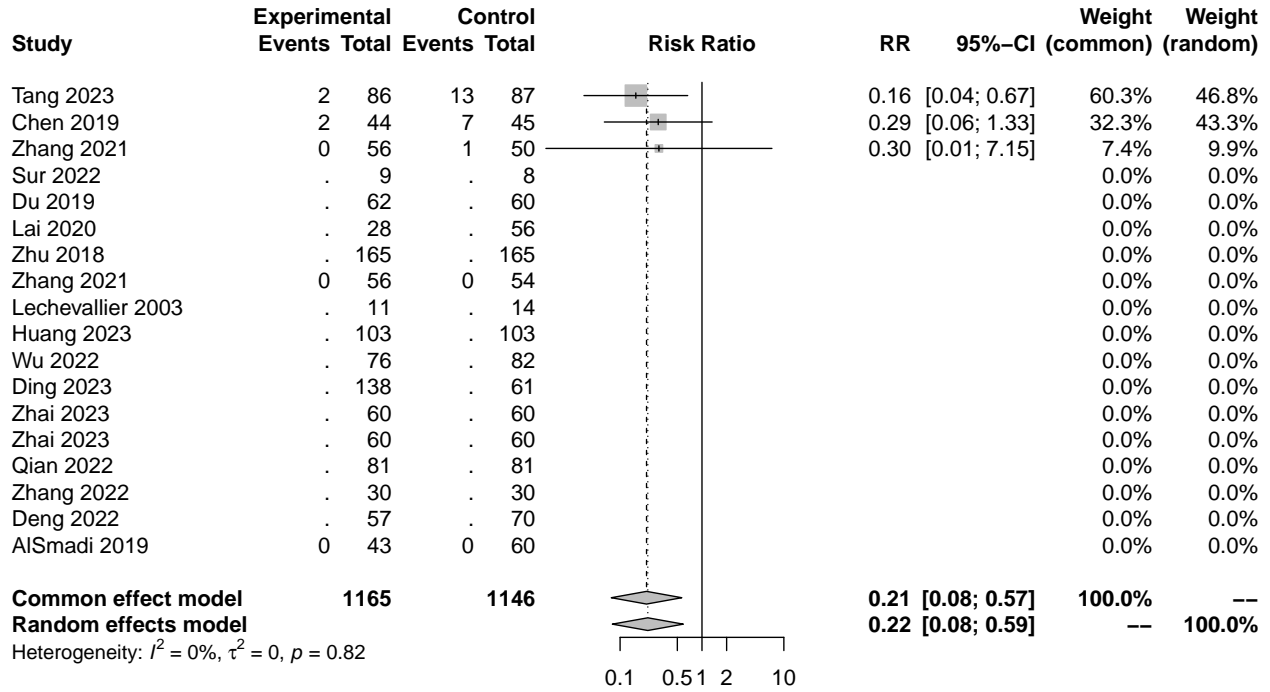

### 4.13.3 Trim and Fill

```
trimfill(pain_metabin)
```

```
## Warning in trimfill.meta(pain_metabin): 15 observation(s) dropped due to
## missing values

## Number of studies: k = 3 (with 0 added studies)
## Number of observations: o = 368
## Number of events: e = 25
##
##
##          RR          95%-CI      z p-value
## Random effects model 0.2180 [0.0804; 0.5913] -2.99 0.0028
##
## Quantifying heterogeneity:
## tau^2 = 0 [0.0000; 4.5123]; tau = 0 [0.0000; 2.1242]
## I^2 = 0.0% [0.0%; 89.6%]; H = 1.00 [1.00; 3.10]
##
## Test of heterogeneity:
##   Q d.f. p-value
## 0.39  2 0.8246
##
## Details on meta-analytical method:
## - Inverse variance method
## - Restricted maximum-likelihood estimator for tau^2
## - Q-Profile method for confidence interval of tau^2 and tau
## - Trim-and-fill method to adjust for funnel plot asymmetry (L-estimator)
```

```
forest(trimfill(pain_metabin),
        sortvar = TE)
```

```
## Warning in trimfill.meta(pain_metabin): 15 observation(s) dropped due to
## missing values
```

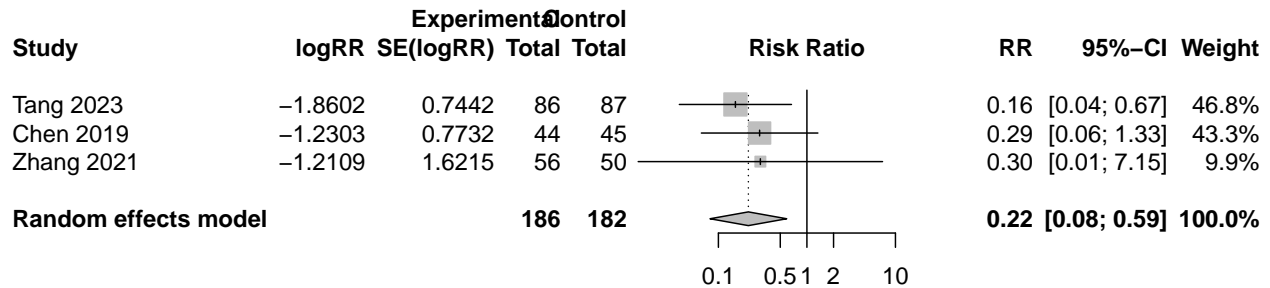



#### 4.13.4 Funnel plot

```
funnel(trimfill(pain_metabin))
```

```
## Warning in trimfill.meta(pain_metabin): 15 observation(s) dropped due to  
## missing values
```

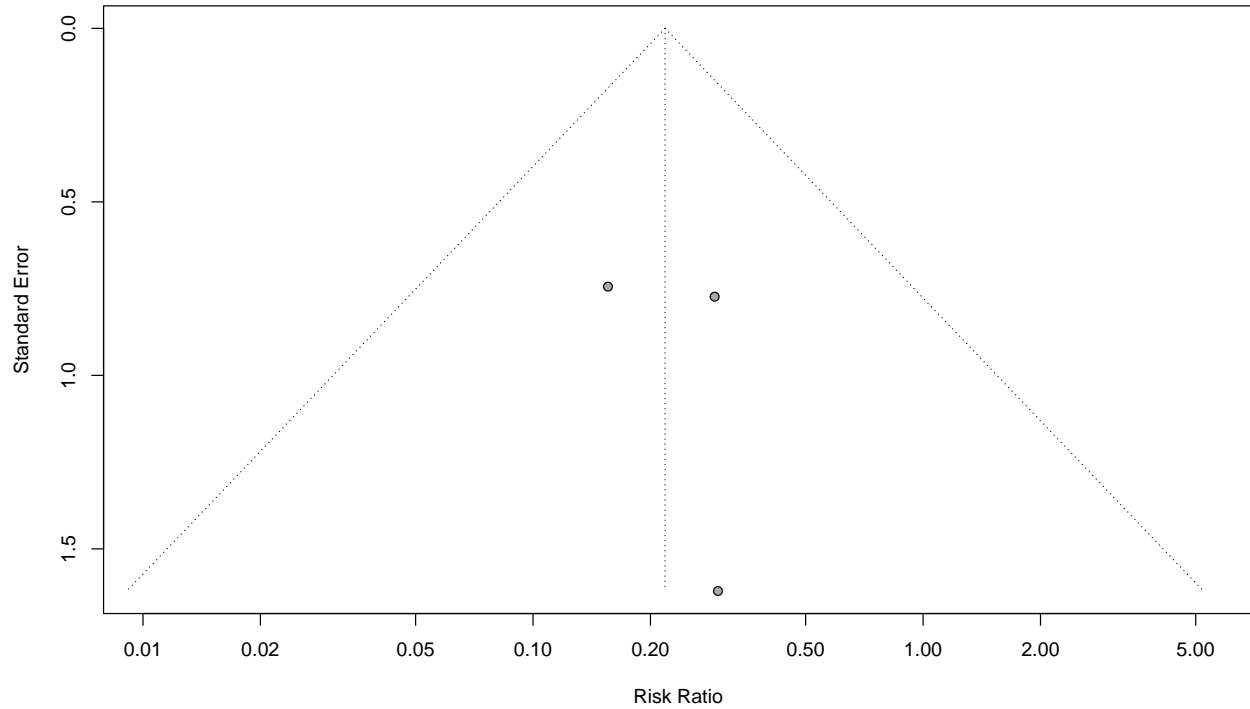

#### 4.13.5 Baujat

```
baujat(pain_metabin, pos = 1)
```

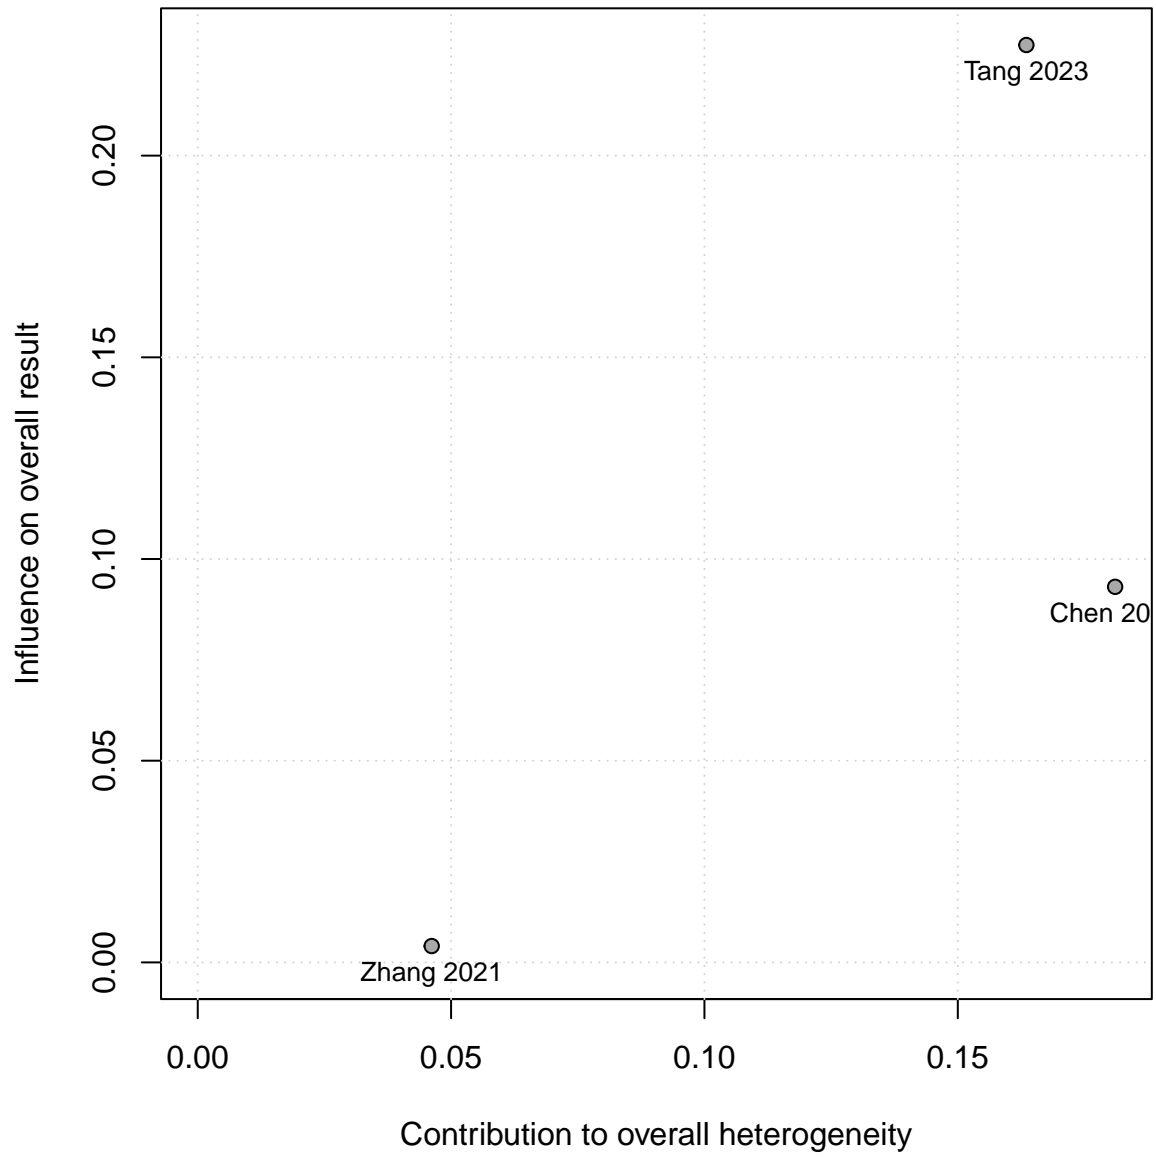

#### 4.13.6 Leave one out

```
metainf(pain_metabin, pos = 1)
```

```
## Influential analysis (common effect model)
##
##
##          RR          95%-CI p-value  tau^2  tau
## Omitting Sur 2022      0.2103 [0.0780; 0.5670] 0.0021 0.0000 0.0000
## Omitting Tang 2023      0.2933 [0.0747; 1.1520] 0.0789 0.0000 0.0000
## Omitting Chen 2019      0.1712 [0.0457; 0.6414] 0.0088 0.0000 0.0000
## Omitting Du 2019        0.2103 [0.0780; 0.5670] 0.0021 0.0000 0.0000
## Omitting Lai 2020       0.2103 [0.0780; 0.5670] 0.0021 0.0000 0.0000
## Omitting Zhu 2018       0.2103 [0.0780; 0.5670] 0.0021 0.0000 0.0000
## Omitting Zhang 2021     0.2033 [0.0715; 0.5781] 0.0028 0.0000 0.0000
## Omitting Zhang 2021     0.2103 [0.0780; 0.5670] 0.0021 0.0000 0.0000
## Omitting Lechevallier 2003 0.2103 [0.0780; 0.5670] 0.0021 0.0000 0.0000
## Omitting Huang 2023     0.2103 [0.0780; 0.5670] 0.0021 0.0000 0.0000
## Omitting Wu 2022        0.2103 [0.0780; 0.5670] 0.0021 0.0000 0.0000
## Omitting Ding 2023      0.2103 [0.0780; 0.5670] 0.0021 0.0000 0.0000
## Omitting Zhai 2023      0.2103 [0.0780; 0.5670] 0.0021 0.0000 0.0000
## Omitting Zhai 2023      0.2103 [0.0780; 0.5670] 0.0021 0.0000 0.0000
## Omitting Qian 2022      0.2103 [0.0780; 0.5670] 0.0021 0.0000 0.0000
## Omitting Zhang 2022     0.2103 [0.0780; 0.5670] 0.0021 0.0000 0.0000
## Omitting Deng 2022      0.2103 [0.0780; 0.5670] 0.0021 0.0000 0.0000
## Omitting AlSmadi 2019   0.2103 [0.0780; 0.5670] 0.0021 0.0000 0.0000
##
## Pooled estimate      0.2103 [0.0780; 0.5670] 0.0021 0.0000 0.0000
##
##          I^2
## Omitting Sur 2022      0.0%
## Omitting Tang 2023      0.0%
## Omitting Chen 2019      0.0%
## Omitting Du 2019        0.0%
## Omitting Lai 2020       0.0%
## Omitting Zhu 2018       0.0%
## Omitting Zhang 2021     0.0%
## Omitting Zhang 2021     0.0%
## Omitting Lechevallier 2003 0.0%
## Omitting Huang 2023     0.0%
## Omitting Wu 2022        0.0%
## Omitting Ding 2023      0.0%
## Omitting Zhai 2023      0.0%
## Omitting Zhai 2023      0.0%
## Omitting Qian 2022      0.0%
## Omitting Zhang 2022     0.0%
## Omitting Deng 2022      0.0%
## Omitting AlSmadi 2019   0.0%
##
## Pooled estimate      0.0%
##
## Details on meta-analytical method:
## - Mantel-Haenszel method
## - Restricted maximum-likelihood estimator for tau^2
```

## 4.14 Stricture

### 4.14.1 Meta-analysis

```
stricture_metabin <- metabin(data = suction_data,
                             event.c = stricture_n_control,
                             n.c = sample_size_control,
                             event.e = stricture_n_suction,
                             n.e = sample_size_suction,
                             studlab = author_year)

stricture_metabin

## Number of studies: k = 2
## Number of observations: o = 2311
## Number of events: e = 4
##
##              RR           95%-CI      z p-value
## Common effect model 0.4911 [0.0916; 2.6336] -0.83 0.4066
## Random effects model 0.6034 [0.0297; 12.2755] -0.33 0.7424
##
## Quantifying heterogeneity:
## tau^2 = 2.2802; tau = 1.5100; I^2 = 48.2%; H = 1.39
##
## Test of heterogeneity:
##   Q d.f. p-value
## 1.93  1 0.1648
##
## Details on meta-analytical method:
## - Mantel-Haenszel method
## - Inverse variance method
## - Restricted maximum-likelihood estimator for tau^2
## - Continuity correction of 0.5 in studies with zero cell frequencies
```

#### 4.14.2 Forest plot

```
forest(stricture_metabin,
       sortvar = TE)
```

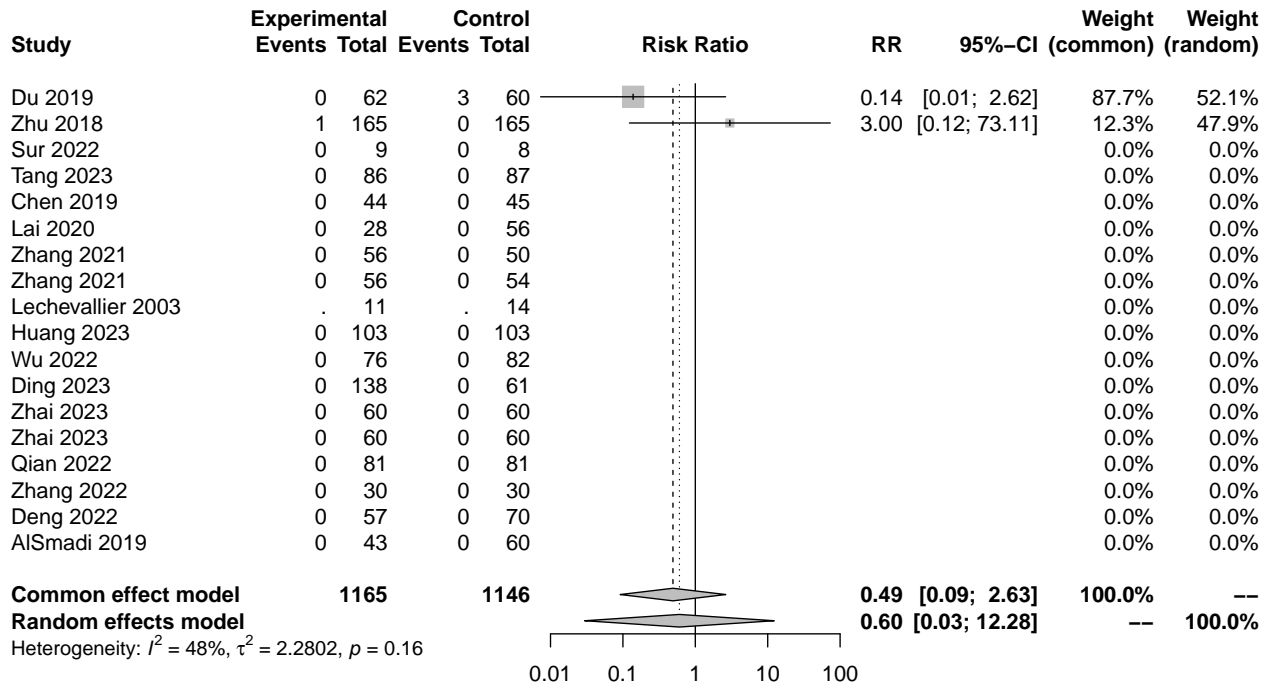

### 4.14.3 Trim and Fill

```
#trimfill(stricture_metabin)  
#forest(trimfill(stricture_metabin),  
#      sortvar = TE)
```

#### 4.14.4 Funnel plot

```
funnel((stricture_metabin))
```

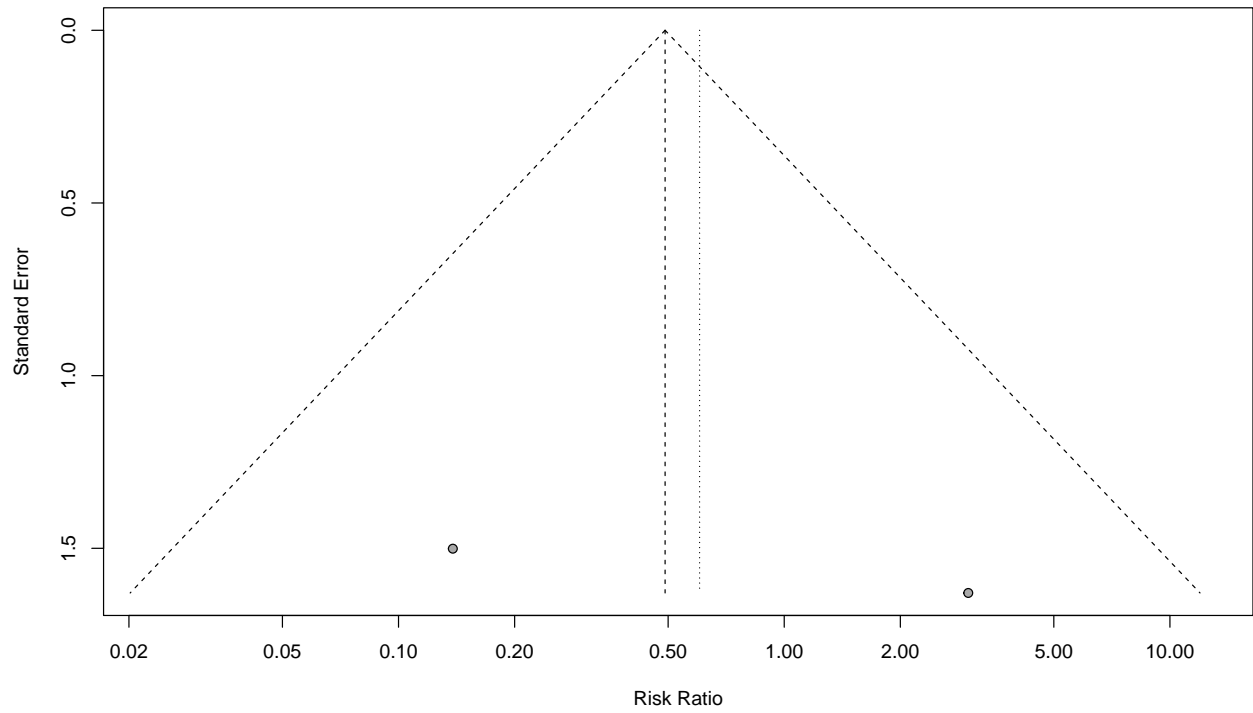

#### 4.14.5 Baujat

```
baujat(stricture_metabin, pos = 1)
```

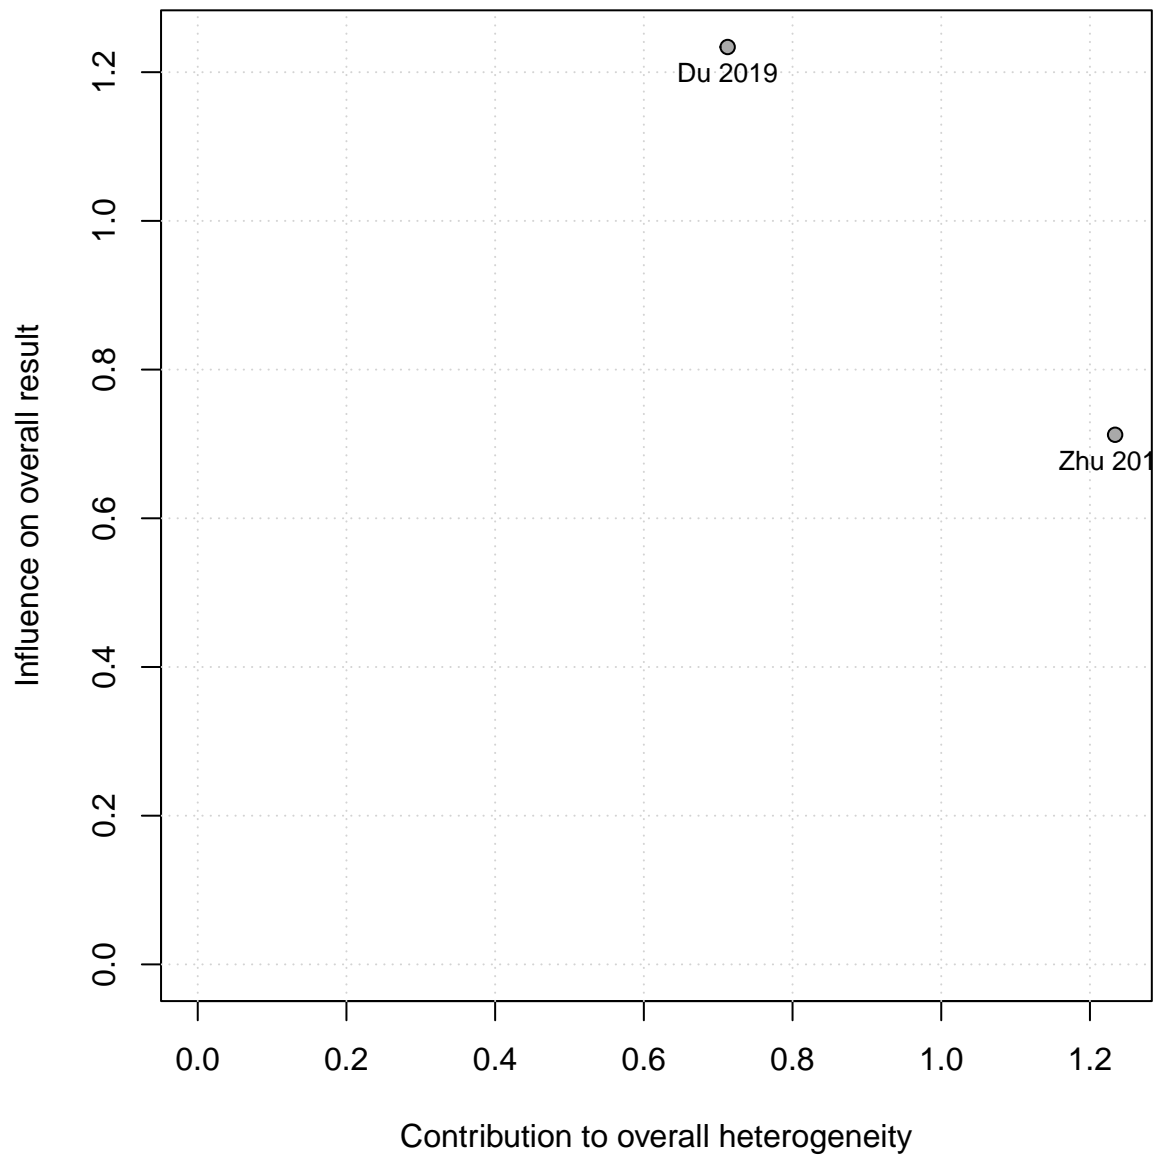



#### 4.14.6 Leave one out

```
metainf(stricture_metabin)
```

```
## Influential analysis (common effect model)
##
##
##          RR          95%-CI p-value  tau^2    tau
## Omitting Sur 2022      0.4911 [0.0916; 2.6336] 0.4066 2.2802 1.5100
## Omitting Tang 2023      0.4911 [0.0916; 2.6336] 0.4066 2.2802 1.5100
## Omitting Chen 2019      0.4911 [0.0916; 2.6336] 0.4066 2.2802 1.5100
## Omitting Du 2019        3.0000 [0.1231; 73.1112] 0.5001
## Omitting Lai 2020       0.4911 [0.0916; 2.6336] 0.4066 2.2802 1.5100
## Omitting Zhu 2018       0.1383 [0.0073; 2.6222] 0.1876
## Omitting Zhang 2021     0.4911 [0.0916; 2.6336] 0.4066 2.2802 1.5100
## Omitting Zhang 2021     0.4911 [0.0916; 2.6336] 0.4066 2.2802 1.5100
## Omitting Lechevallier 2003 0.4911 [0.0916; 2.6336] 0.4066 2.2802 1.5100
## Omitting Huang 2023     0.4911 [0.0916; 2.6336] 0.4066 2.2802 1.5100
## Omitting Wu 2022        0.4911 [0.0916; 2.6336] 0.4066 2.2802 1.5100
## Omitting Ding 2023      0.4911 [0.0916; 2.6336] 0.4066 2.2802 1.5100
## Omitting Zhai 2023      0.4911 [0.0916; 2.6336] 0.4066 2.2802 1.5100
## Omitting Zhai 2023      0.4911 [0.0916; 2.6336] 0.4066 2.2802 1.5100
## Omitting Qian 2022      0.4911 [0.0916; 2.6336] 0.4066 2.2802 1.5100
## Omitting Zhang 2022     0.4911 [0.0916; 2.6336] 0.4066 2.2802 1.5100
## Omitting Deng 2022      0.4911 [0.0916; 2.6336] 0.4066 2.2802 1.5100
## Omitting AlSmadi 2019   0.4911 [0.0916; 2.6336] 0.4066 2.2802 1.5100
##
## Pooled estimate        0.4911 [0.0916; 2.6336] 0.4066 2.2802 1.5100
##
##          I^2
## Omitting Sur 2022      48.2%
## Omitting Tang 2023      48.2%
## Omitting Chen 2019      48.2%
## Omitting Du 2019
## Omitting Lai 2020       48.2%
## Omitting Zhu 2018
## Omitting Zhang 2021     48.2%
## Omitting Zhang 2021     48.2%
## Omitting Lechevallier 2003 48.2%
## Omitting Huang 2023     48.2%
## Omitting Wu 2022        48.2%
## Omitting Ding 2023      48.2%
## Omitting Zhai 2023      48.2%
## Omitting Zhai 2023      48.2%
## Omitting Qian 2022      48.2%
## Omitting Zhang 2022     48.2%
## Omitting Deng 2022      48.2%
## Omitting AlSmadi 2019   48.2%
##
## Pooled estimate        48.2%
##
## Details on meta-analytical method:
## - Mantel-Haenszel method
## - Restricted maximum-likelihood estimator for tau^2
```

## 4.15 Embolisation required

### 4.15.1 Meta-analysis

```
ir_embolisation_metabin <- metabin(data = suction_data,
                                   event.c = embolism_ir_intervention_n_control,
                                   n.c = sample_size_control,
                                   event.e = embolism_ir_intervention_n_suction,
                                   n.e = sample_size_suction,
                                   studlab = author_year)
ir_embolisation_metabin

## Number of studies: k = 2
## Number of observations: o = 2311
## Number of events: e = 3
##
##              RR          95%-CI      z p-value
## Common effect model 0.2830 [0.0318; 2.5161] -1.13 0.2575
## Random effects model 0.2867 [0.0322; 2.5524] -1.12 0.2627
##
## Quantifying heterogeneity:
## tau^2 = 0; tau = 0; I^2 = 0.0%; H = 1.00
##
## Test of heterogeneity:
##      Q d.f. p-value
## 0.02   1 0.8828
##
## Details on meta-analytical method:
## - Mantel-Haenszel method
## - Inverse variance method
## - Restricted maximum-likelihood estimator for tau^2
## - Continuity correction of 0.5 in studies with zero cell frequencies
```

### 4.15.2 Forest plot

```
forest(ir_embolisation_metabin,
       sortvar = TE)
```

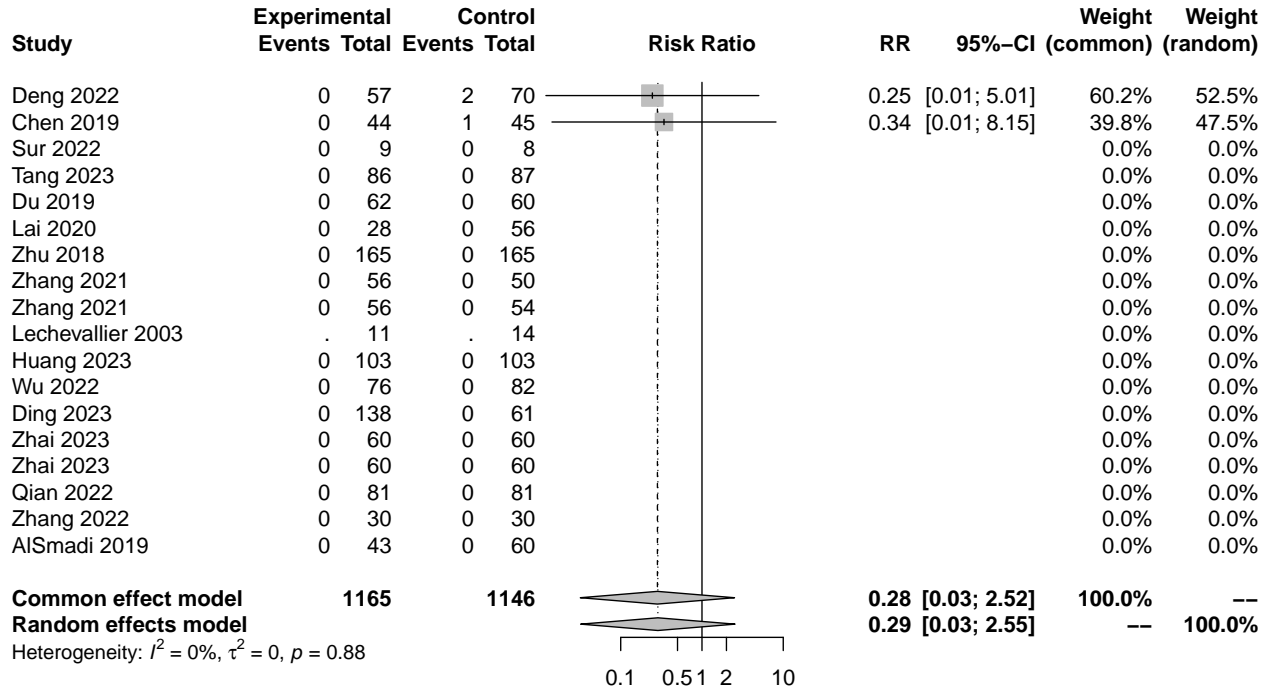

### 4.15.3 Trim and Fill

```
#trimfill(ir_embolisation_metabin)  
#forest(trimfill(ir_embolisation_metabin),  
#      sortvar = TE)
```

#### 4.15.4 Funnel plot

```
funnel((ir_embolisation_metabin))
```

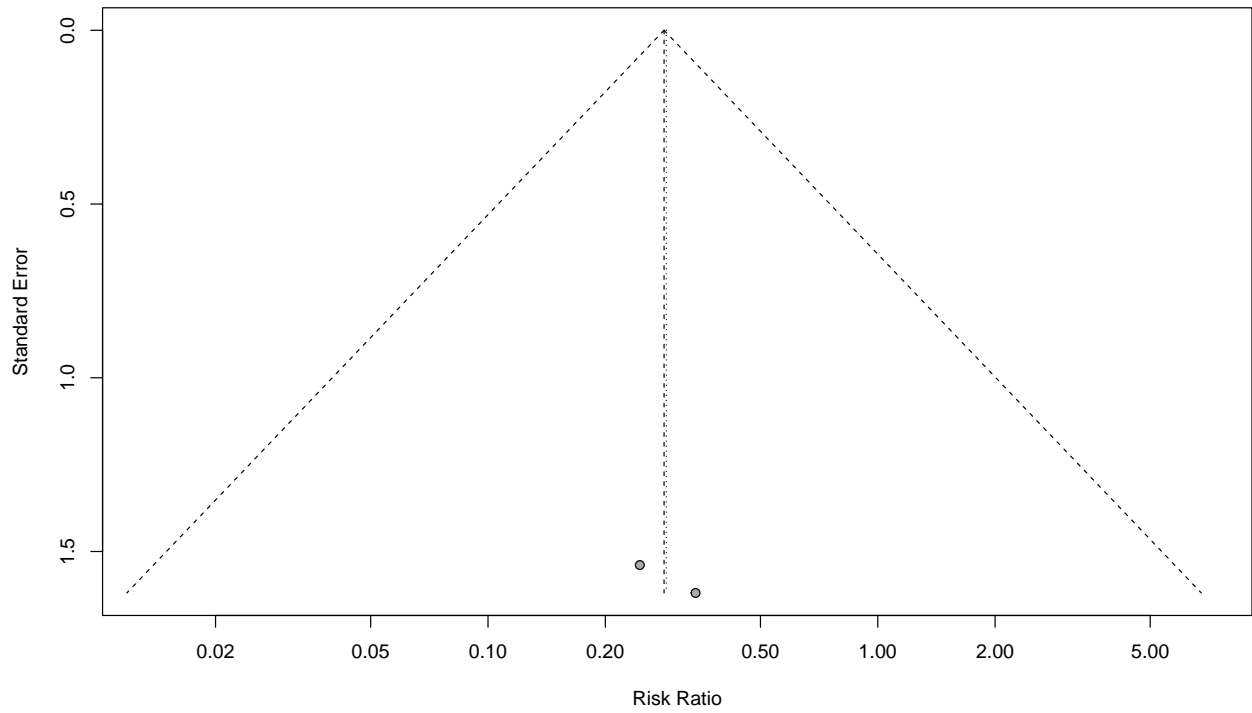

#### 4.15.5 Baujat

```
baujat(ir_embolisation_metabin, pos = 1)
```

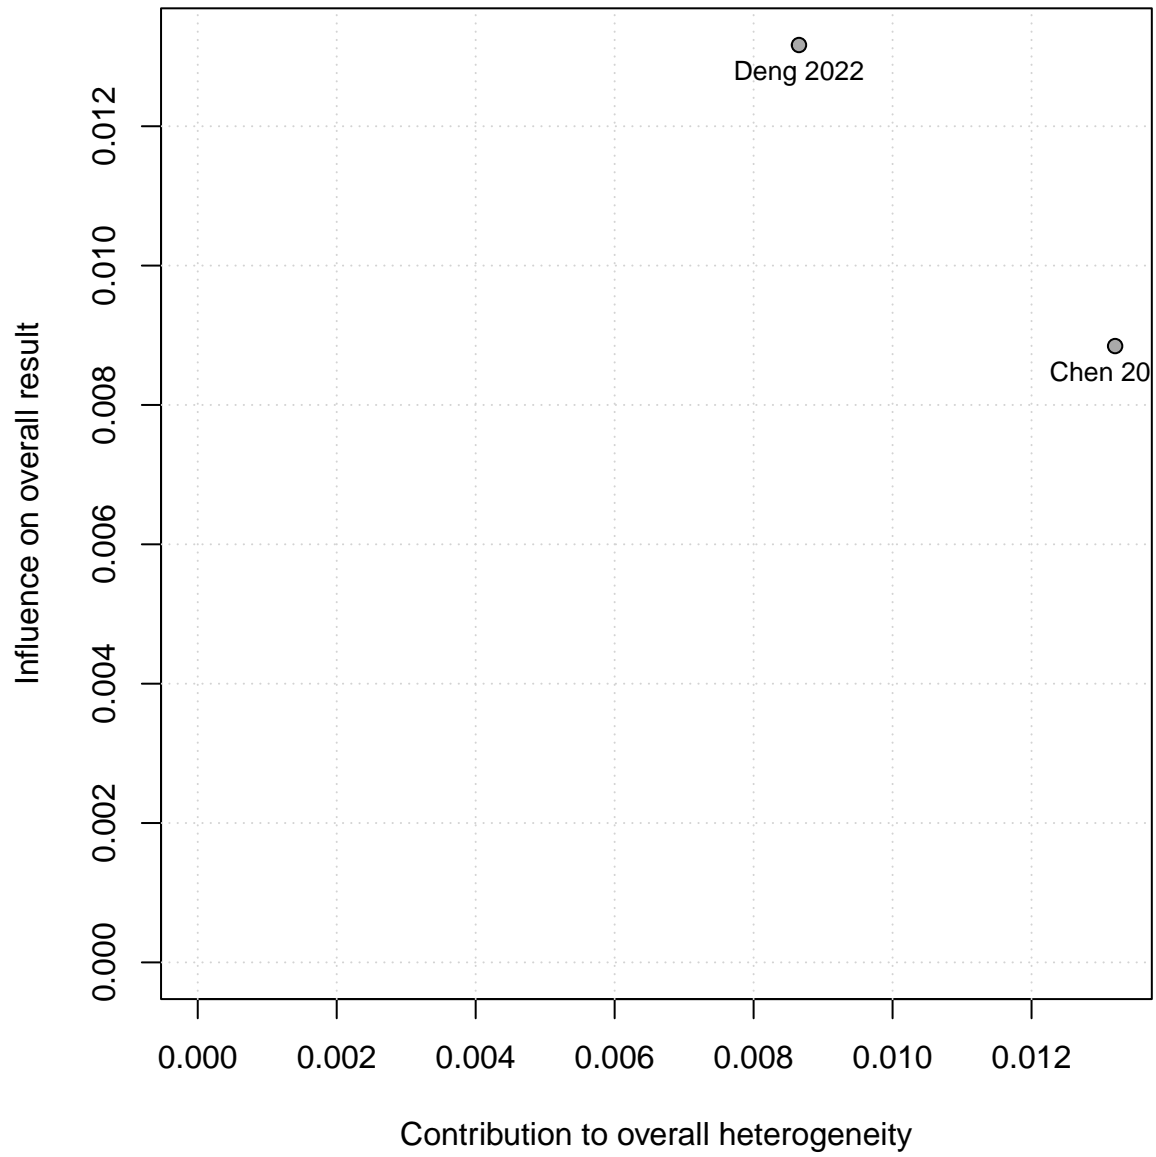

#### 4.15.6 Leave one out

```
metainf(ir_embolisation_metabin)
```

```
## Influential analysis (common effect model)
##
##
##          RR          95%-CI p-value  tau^2  tau
## Omitting Sur 2022      0.2830 [0.0318; 2.5161]  0.2575  0.0000  0.0000
## Omitting Tang 2023      0.2830 [0.0318; 2.5161]  0.2575  0.0000  0.0000
## Omitting Chen 2019      0.2448 [0.0120; 4.9992]  0.3605
## Omitting Du 2019        0.2830 [0.0318; 2.5161]  0.2575  0.0000  0.0000
## Omitting Lai 2020       0.2830 [0.0318; 2.5161]  0.2575  0.0000  0.0000
## Omitting Zhu 2018       0.2830 [0.0318; 2.5161]  0.2575  0.0000  0.0000
## Omitting Zhang 2021     0.2830 [0.0318; 2.5161]  0.2575  0.0000  0.0000
## Omitting Zhang 2021     0.2830 [0.0318; 2.5161]  0.2575  0.0000  0.0000
## Omitting Lechevallier 2003 0.2830 [0.0318; 2.5161]  0.2575  0.0000  0.0000
## Omitting Huang 2023     0.2830 [0.0318; 2.5161]  0.2575  0.0000  0.0000
## Omitting Wu 2022        0.2830 [0.0318; 2.5161]  0.2575  0.0000  0.0000
## Omitting Ding 2023      0.2830 [0.0318; 2.5161]  0.2575  0.0000  0.0000
## Omitting Zhai 2023      0.2830 [0.0318; 2.5161]  0.2575  0.0000  0.0000
## Omitting Zhai 2023      0.2830 [0.0318; 2.5161]  0.2575  0.0000  0.0000
## Omitting Qian 2022      0.2830 [0.0318; 2.5161]  0.2575  0.0000  0.0000
## Omitting Zhang 2022     0.2830 [0.0318; 2.5161]  0.2575  0.0000  0.0000
## Omitting Deng 2022      0.3407 [0.0143; 8.1456]  0.5062
## Omitting AlSmadi 2019   0.2830 [0.0318; 2.5161]  0.2575  0.0000  0.0000
##
## Pooled estimate        0.2830 [0.0318; 2.5161]  0.2575  0.0000  0.0000
##
##          I^2
## Omitting Sur 2022      0.0%
## Omitting Tang 2023      0.0%
## Omitting Chen 2019
## Omitting Du 2019       0.0%
## Omitting Lai 2020      0.0%
## Omitting Zhu 2018      0.0%
## Omitting Zhang 2021    0.0%
## Omitting Zhang 2021    0.0%
## Omitting Lechevallier 2003 0.0%
## Omitting Huang 2023    0.0%
## Omitting Wu 2022       0.0%
## Omitting Ding 2023     0.0%
## Omitting Zhai 2023     0.0%
## Omitting Zhai 2023     0.0%
## Omitting Qian 2022     0.0%
## Omitting Zhang 2022    0.0%
## Omitting Deng 2022
## Omitting AlSmadi 2019  0.0%
##
## Pooled estimate        0.0%
##
## Details on meta-analytical method:
## - Mantel-Haenszel method
## - Restricted maximum-likelihood estimator for tau^2
```

## 4.16 Transfusion

### 4.16.1 Meta-analysis

```
transfusion_metabin <- metabin(data = suction_data,
                               event.c = transfusion_n_control,
                               n.c = sample_size_control,
                               event.e = transfusion_n_suction,
                               n.e = sample_size_suction,
                               studlab = author_year)

transfusion_metabin

## Number of studies: k = 3
## Number of observations: o = 2311
## Number of events: e = 12
##
##              RR          95%-CI      z p-value
## Common effect model 0.1445 [0.0280; 0.7467] -2.31 0.0210
## Random effects model 0.1632 [0.0302; 0.8826] -2.10 0.0353
##
## Quantifying heterogeneity:
## tau^2 = 0 [0.0000; 22.9527]; tau = 0 [0.0000; 4.7909]
## I^2 = 0.0% [0.0%; 89.6%]; H = 1.00 [1.00; 3.10]
##
## Test of heterogeneity:
##      Q d.f. p-value
## 0.57   2 0.7525
##
## Details on meta-analytical method:
## - Mantel-Haenszel method
## - Inverse variance method
## - Restricted maximum-likelihood estimator for tau^2
## - Q-Profile method for confidence interval of tau^2 and tau
## - Continuity correction of 0.5 in studies with zero cell frequencies
```



### 4.16.2 Forest plot

```
forest(transfusion_metabin,
       sortvar = TE)
```

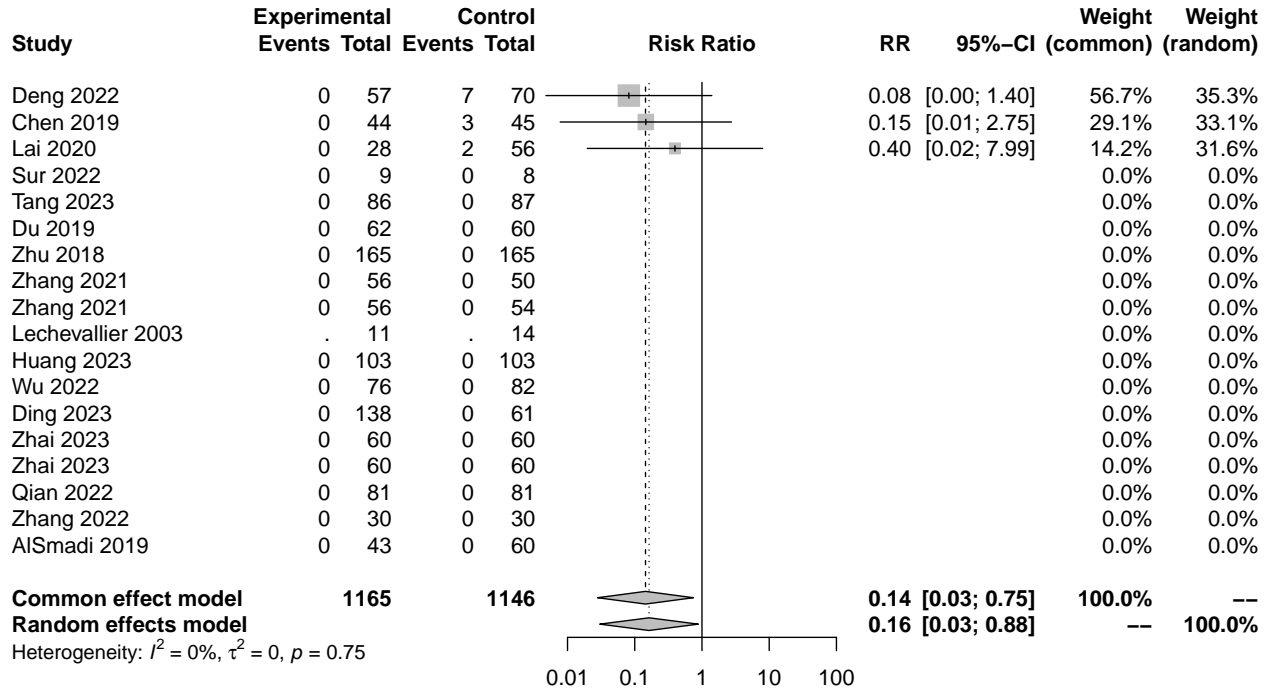

### 4.16.3 Trim and Fill

```
trimfill(transfusion_metabin)
```

```
## Warning in trimfill.meta(transfusion_metabin): 15 observation(s) dropped due to
## missing values

## Number of studies: k = 3 (with 0 added studies)
## Number of observations: o = 300
## Number of events: e = 12
##
##                RR          95%-CI      z p-value
## Random effects model 0.1632 [0.0302; 0.8826] -2.10  0.0353
##
## Quantifying heterogeneity:
## tau^2 = 0 [0.0000; 22.9527]; tau = 0 [0.0000; 4.7909]
## I^2 = 0.0% [0.0%; 89.6%]; H = 1.00 [1.00; 3.10]
##
## Test of heterogeneity:
##      Q d.f. p-value
## 0.57   2  0.7525
##
## Details on meta-analytical method:
## - Inverse variance method
## - Restricted maximum-likelihood estimator for tau^2
## - Q-Profile method for confidence interval of tau^2 and tau
## - Trim-and-fill method to adjust for funnel plot asymmetry (L-estimator)
```

```
forest(trimfill(transfusion_metabin),
        sortvar = TE)
```

```
## Warning in trimfill.meta(transfusion_metabin): 15 observation(s) dropped due to
## missing values
```

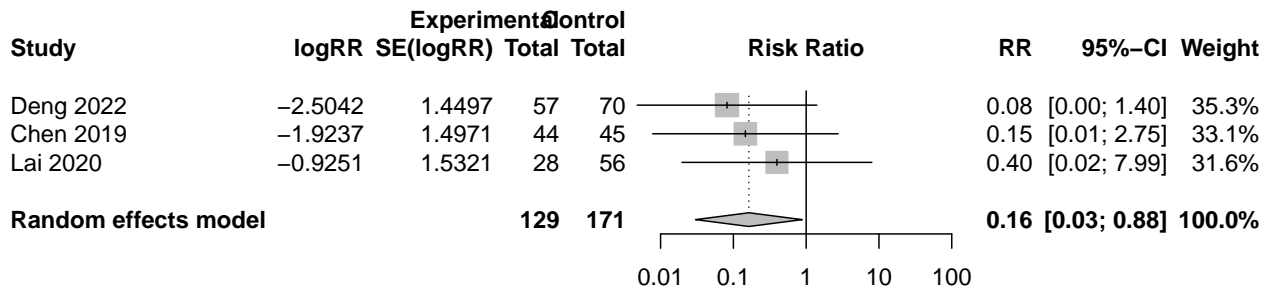

#### 4.16.4 Funnel plot

```
funnel(trimfill(transfusion_metabin))
```

```
## Warning in trimfill.meta(transfusion_metabin): 15 observation(s) dropped due to  
## missing values
```

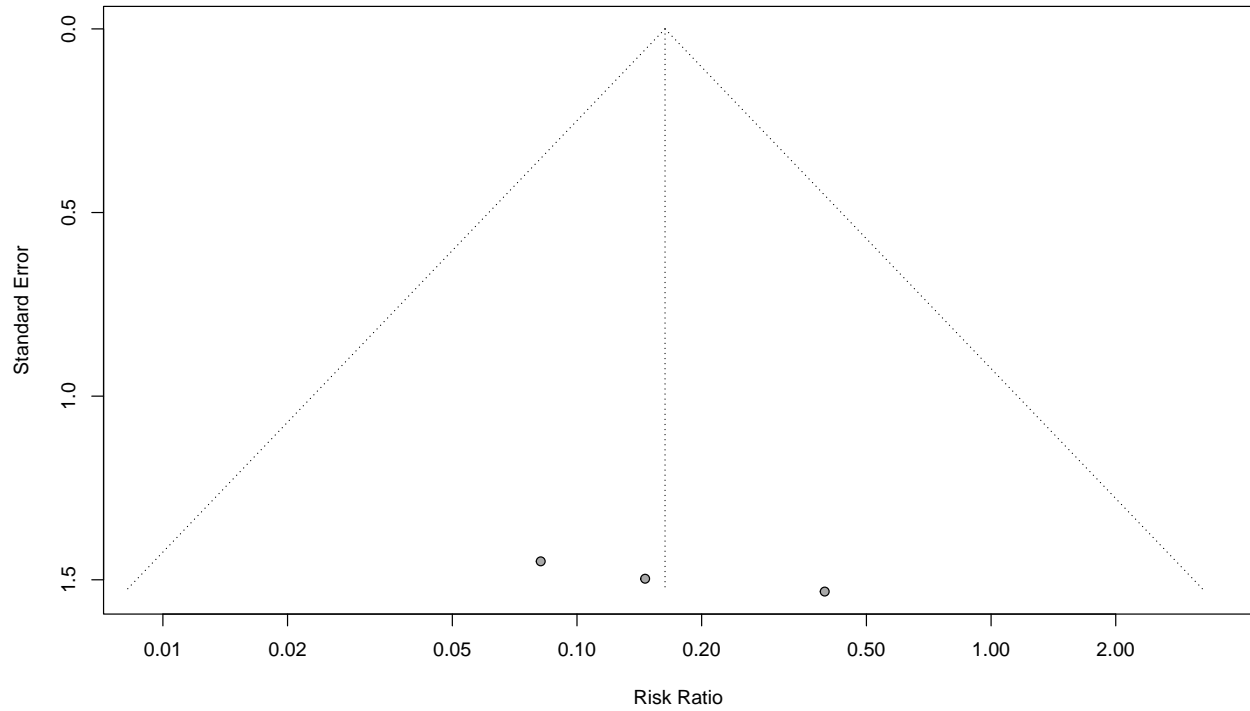

#### 4.16.5 Baujat

```
baujat(transfusion_metabin, pos = 1)
```

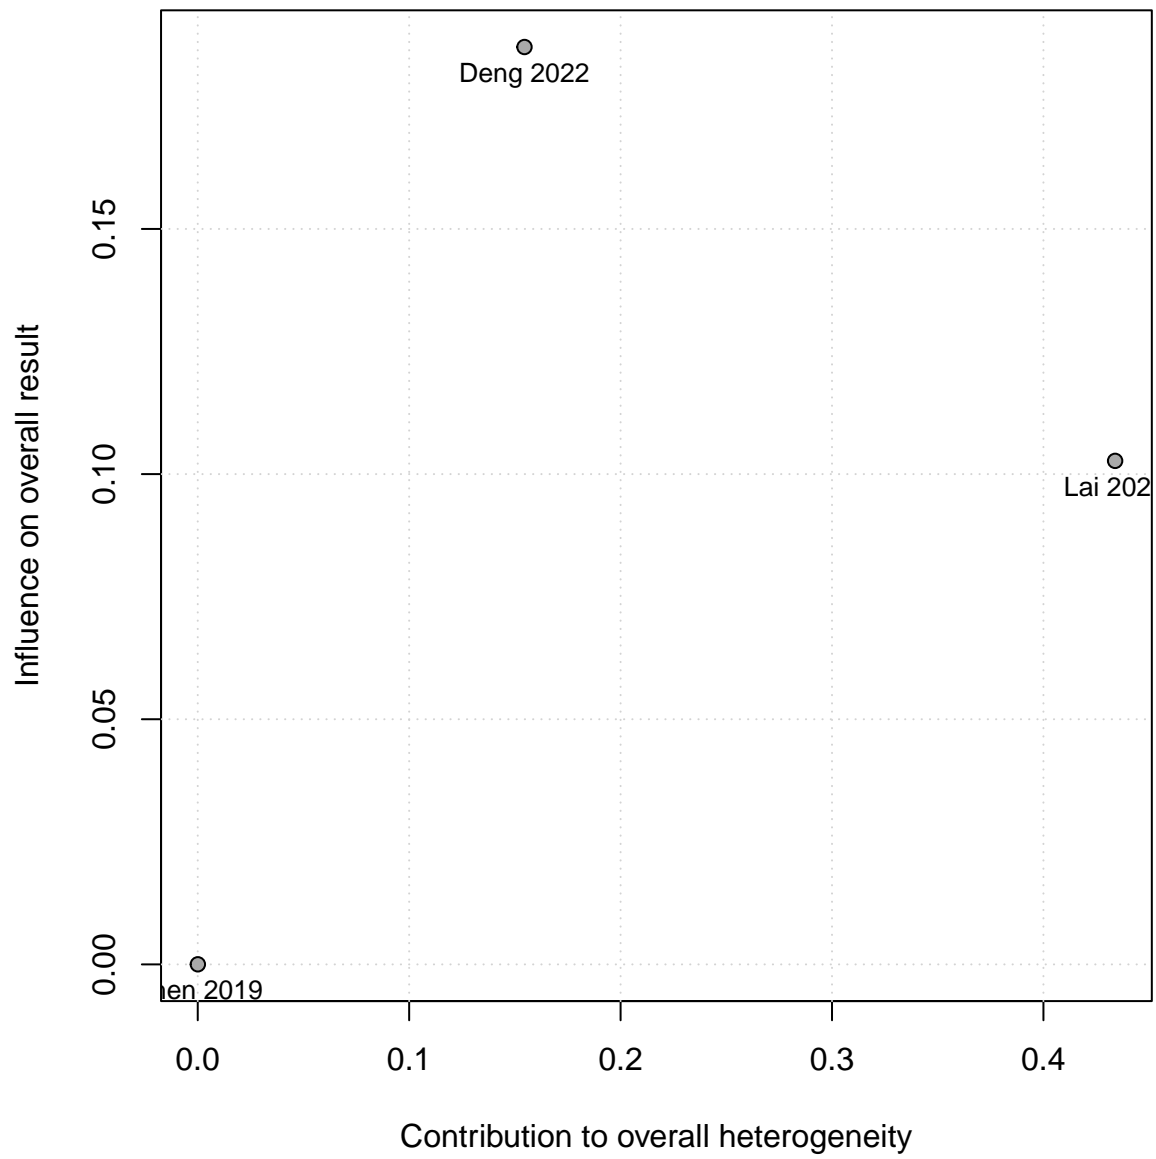

#### 4.16.6 Leave one out

```
metainf(transfusion_metabin)
```

```
## Influential analysis (common effect model)
##
##           RR           95%-CI p-value  tau^2    tau
## Omitting Sur 2022      0.1445 [0.0280; 0.7467]  0.0210  0.0000  0.0000
## Omitting Tang 2023     0.1445 [0.0280; 0.7467]  0.0210  0.0000  0.0000
## Omitting Chen 2019    0.1439 [0.0199; 1.0412]  0.0549  0.0000  0.0000
## Omitting Du 2019      0.1445 [0.0280; 0.7467]  0.0210  0.0000  0.0000
## Omitting Lai 2020     0.1035 [0.0134; 0.7992]  0.0296  0.0000  0.0000
## Omitting Zhu 2018     0.1445 [0.0280; 0.7467]  0.0210  0.0000  0.0000
## Omitting Zhang 2021   0.1445 [0.0280; 0.7467]  0.0210  0.0000  0.0000
## Omitting Zhang 2021   0.1445 [0.0280; 0.7467]  0.0210  0.0000  0.0000
## Omitting Lechevallier 2003 0.1445 [0.0280; 0.7467]  0.0210  0.0000  0.0000
## Omitting Huang 2023   0.1445 [0.0280; 0.7467]  0.0210  0.0000  0.0000
## Omitting Wu 2022     0.1445 [0.0280; 0.7467]  0.0210  0.0000  0.0000
## Omitting Ding 2023    0.1445 [0.0280; 0.7467]  0.0210  0.0000  0.0000
## Omitting Zhai 2023    0.1445 [0.0280; 0.7467]  0.0210  0.0000  0.0000
## Omitting Zhai 2023    0.1445 [0.0280; 0.7467]  0.0210  0.0000  0.0000
## Omitting Qian 2022    0.1445 [0.0280; 0.7467]  0.0210  0.0000  0.0000
## Omitting Zhang 2022   0.1445 [0.0280; 0.7467]  0.0210  0.0000  0.0000
## Omitting Deng 2022    0.2270 [0.0294; 1.7540]  0.1552  0.0000  0.0000
## Omitting AlSmadi 2019 0.1445 [0.0280; 0.7467]  0.0210  0.0000  0.0000
##
## Pooled estimate      0.1445 [0.0280; 0.7467]  0.0210  0.0000  0.0000
##           I^2
## Omitting Sur 2022      0.0%
## Omitting Tang 2023     0.0%
## Omitting Chen 2019     0.0%
## Omitting Du 2019       0.0%
## Omitting Lai 2020      0.0%
## Omitting Zhu 2018      0.0%
## Omitting Zhang 2021    0.0%
## Omitting Zhang 2021    0.0%
## Omitting Lechevallier 2003 0.0%
## Omitting Huang 2023    0.0%
## Omitting Wu 2022       0.0%
## Omitting Ding 2023     0.0%
## Omitting Zhai 2023     0.0%
## Omitting Zhai 2023     0.0%
## Omitting Qian 2022     0.0%
## Omitting Zhang 2022    0.0%
## Omitting Deng 2022     0.0%
## Omitting AlSmadi 2019  0.0%
##
## Pooled estimate      0.0%
##
## Details on meta-analytical method:
## - Mantel-Haenszel method
## - Restricted maximum-likelihood estimator for tau^2
```

## 4.17 Clavien I

### 4.17.1 Meta-analysis

```
clav_i_metabin <- metabin(data = suction_data,
                          event.c = clavien_i_n_control,
                          n.c = sample_size_control,
                          event.e = clavien_i_n_suction,
                          n.e = sample_size_suction,
                          studlab = author_year)

clav_i_metabin

## Number of studies: k = 8
## Number of observations: o = 2311
## Number of events: e = 92
##
##              RR          95%-CI      z p-value
## Common effect model 0.6019 [0.4026; 0.9000] -2.47 0.0134
## Random effects model 0.5978 [0.3984; 0.8970] -2.48 0.0130
##
## Quantifying heterogeneity:
## tau^2 = 0; tau = 0; I^2 = 0.0% [0.0%; 67.6%]; H = 1.00 [1.00; 1.76]
##
## Test of heterogeneity:
##      Q d.f. p-value
## 1.57   7 0.9798
##
## Details on meta-analytical method:
## - Mantel-Haenszel method
## - Inverse variance method
## - Restricted maximum-likelihood estimator for tau^2
## - Continuity correction of 0.5 in studies with zero cell frequencies
```

### 4.17.2 Forest plot

```
forest(clav_i_metabin,
       sortvar = TE)
```

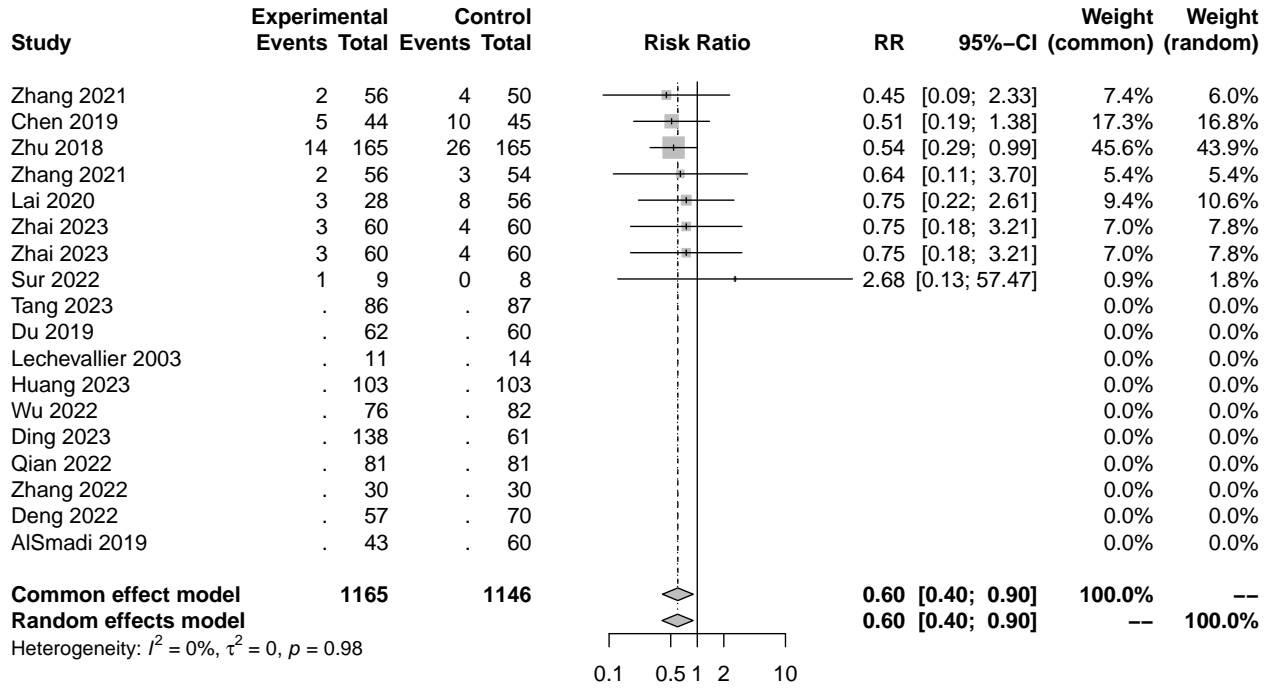

### 4.17.3 Trim and Fill

```
trimfill(clav_i_metabin)
```

```
## Warning in trimfill.meta(clav_i_metabin): 10 observation(s) dropped due to
## missing values

## Number of studies: k = 11 (with 3 added studies)
## Number of observations: o = 1233
## Number of events: e = 107
##
##              RR          95%-CI      z p-value
## Random effects model 0.5548 [0.3814; 0.8069] -3.08 0.0021
##
## Quantifying heterogeneity:
## tau^2 = 0; tau = 0; I^2 = 0.0% [0.0%; 60.2%]; H = 1.00 [1.00; 1.59]
##
## Test of heterogeneity:
##   Q d.f. p-value
## 3.05  10 0.9803
##
## Details on meta-analytical method:
## - Inverse variance method
## - Restricted maximum-likelihood estimator for tau^2
## - Trim-and-fill method to adjust for funnel plot asymmetry (L-estimator)
```

```
forest(trimfill(clav_i_metabin),
        sortvar = TE)
```

```
## Warning in trimfill.meta(clav_i_metabin): 10 observation(s) dropped due to
## missing values
```

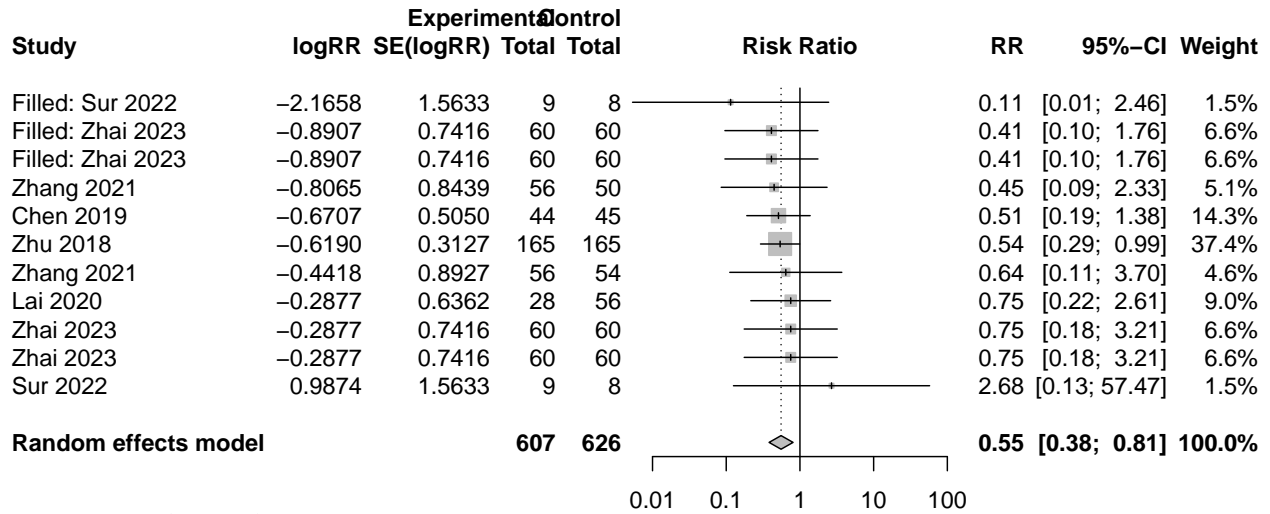



#### 4.17.4 Funnel plot

```
funnel(trimfill(clav_i_metabin))
```

```
## Warning in trimfill.meta(clav_i_metabin): 10 observation(s) dropped due to  
## missing values
```

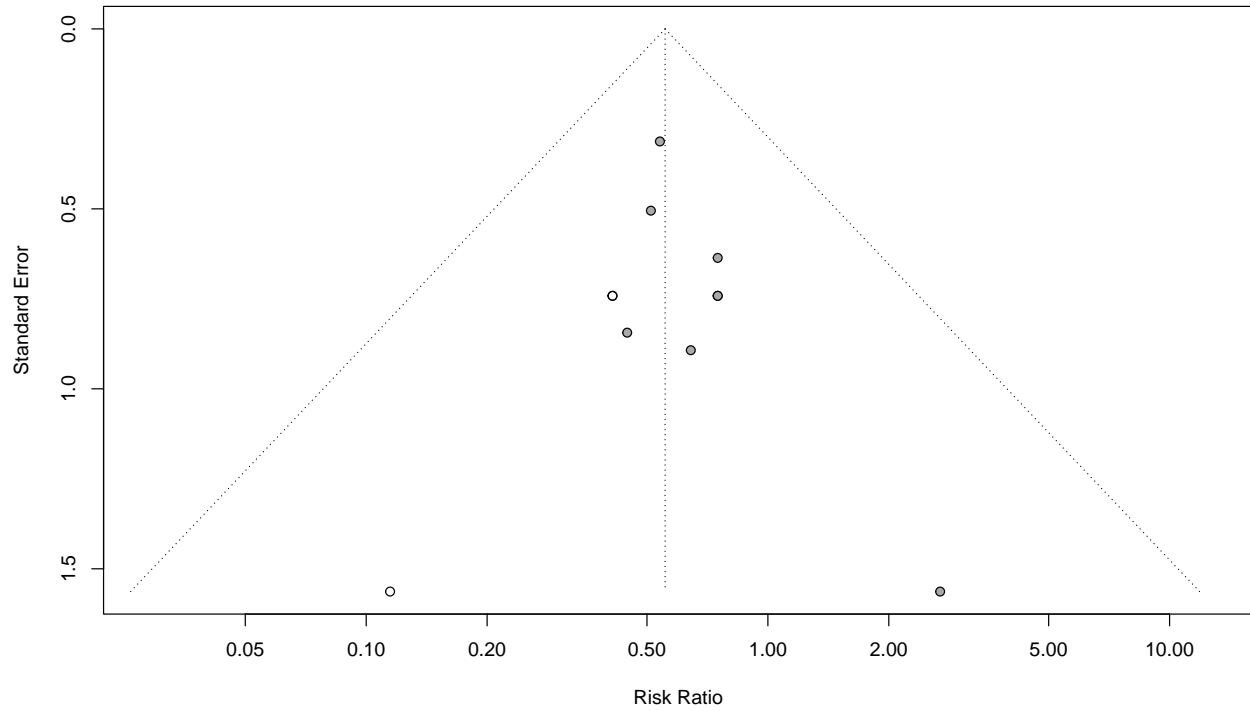

#### 4.17.5 Baujat

```
baujat(clav_i_metabin, pos = 1)
```

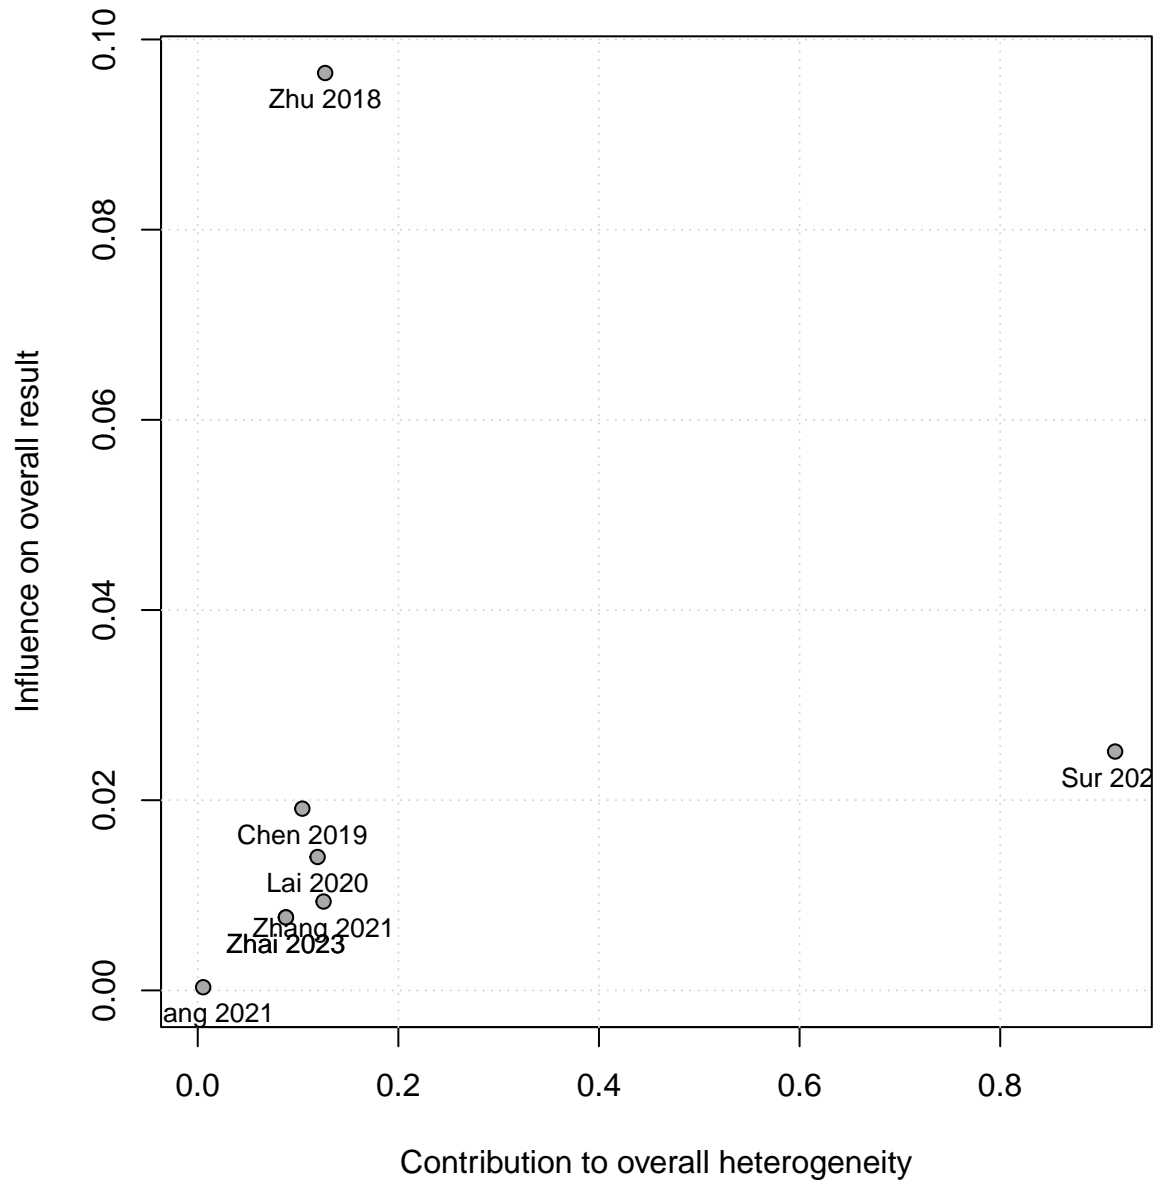

#### 4.17.6 Leave one out

```
metainf(clav_i_metabin)
```

```
## Influential analysis (common effect model)
##
##
##          RR          95%-CI p-value  tau^2    tau
## Omitting Sur 2022      0.5824 [0.3872; 0.8760]  0.0094  0.0000  0.0000
## Omitting Tang 2023     0.6019 [0.4026; 0.9000]  0.0134  0.0000  0.0000
## Omitting Chen 2019     0.6209 [0.3997; 0.9647]  0.0340  0.0000  0.0000
## Omitting Du 2019       0.6019 [0.4026; 0.9000]  0.0134  0.0000  0.0000
## Omitting Lai 2020      0.5867 [0.3834; 0.8977]  0.0140  0.0000  0.0000
## Omitting Zhu 2018      0.6551 [0.3839; 1.1179]  0.1208  0.0000  0.0000
## Omitting Zhang 2021    0.6144 [0.4057; 0.9304]  0.0214  0.0000  0.0000
## Omitting Zhang 2021    0.5996 [0.3966; 0.9065]  0.0153  0.0000  0.0000
## Omitting Lechevallier 2003 0.6019 [0.4026; 0.9000]  0.0134  0.0000  0.0000
## Omitting Huang 2023    0.6019 [0.4026; 0.9000]  0.0134  0.0000  0.0000
## Omitting Wu 2022       0.6019 [0.4026; 0.9000]  0.0134  0.0000  0.0000
## Omitting Ding 2023     0.6019 [0.4026; 0.9000]  0.0134  0.0000  0.0000
## Omitting Zhai 2023     0.5908 [0.3886; 0.8981]  0.0138  0.0000  0.0000
## Omitting Zhai 2023     0.5908 [0.3886; 0.8981]  0.0138  0.0000  0.0000
## Omitting Qian 2022     0.6019 [0.4026; 0.9000]  0.0134  0.0000  0.0000
## Omitting Zhang 2022    0.6019 [0.4026; 0.9000]  0.0134  0.0000  0.0000
## Omitting Deng 2022    0.6019 [0.4026; 0.9000]  0.0134  0.0000  0.0000
## Omitting AlSmadi 2019  0.6019 [0.4026; 0.9000]  0.0134  0.0000  0.0000
##
## Pooled estimate      0.6019 [0.4026; 0.9000]  0.0134  0.0000  0.0000
##
##          I^2
## Omitting Sur 2022      0.0%
## Omitting Tang 2023     0.0%
## Omitting Chen 2019     0.0%
## Omitting Du 2019       0.0%
## Omitting Lai 2020      0.0%
## Omitting Zhu 2018      0.0%
## Omitting Zhang 2021    0.0%
## Omitting Zhang 2021    0.0%
## Omitting Lechevallier 2003 0.0%
## Omitting Huang 2023    0.0%
## Omitting Wu 2022       0.0%
## Omitting Ding 2023     0.0%
## Omitting Zhai 2023     0.0%
## Omitting Zhai 2023     0.0%
## Omitting Qian 2022     0.0%
## Omitting Zhang 2022    0.0%
## Omitting Deng 2022    0.0%
## Omitting AlSmadi 2019  0.0%
##
## Pooled estimate      0.0%
##
## Details on meta-analytical method:
## - Mantel-Haenszel method
## - Restricted maximum-likelihood estimator for tau^2
```

## 4.18 Clavien II

### 4.18.1 Meta-analysis

```
clav_ii_metabin <- metabin(data = suction_data,
                          event.c = clavien_ii_n_control,
                          n.c = sample_size_control,
                          event.e = clavien_ii_n_suction,
                          n.e = sample_size_suction,
                          studlab = author_year)

clav_ii_metabin

## Number of studies: k = 6
## Number of observations: o = 2311
## Number of events: e = 27
##
##              RR          95%-CI      z p-value
## Common effect model 0.3531 [0.1531; 0.8147] -2.44 0.0147
## Random effects model 0.3714 [0.1564; 0.8821] -2.24 0.0248
##
## Quantifying heterogeneity:
## tau^2 = 0 [0.0000; 1.6543]; tau = 0 [0.0000; 1.2862]
## I^2 = 0.0% [0.0%; 74.6%]; H = 1.00 [1.00; 1.99]
##
## Test of heterogeneity:
##      Q d.f. p-value
## 1.71   5 0.8875
##
## Details on meta-analytical method:
## - Mantel-Haenszel method
## - Inverse variance method
## - Restricted maximum-likelihood estimator for tau^2
## - Q-Profile method for confidence interval of tau^2 and tau
## - Continuity correction of 0.5 in studies with zero cell frequencies
```

### 4.18.2 Forest plot

```
forest(clav_ii_metabin,
       sortvar = TE)
```

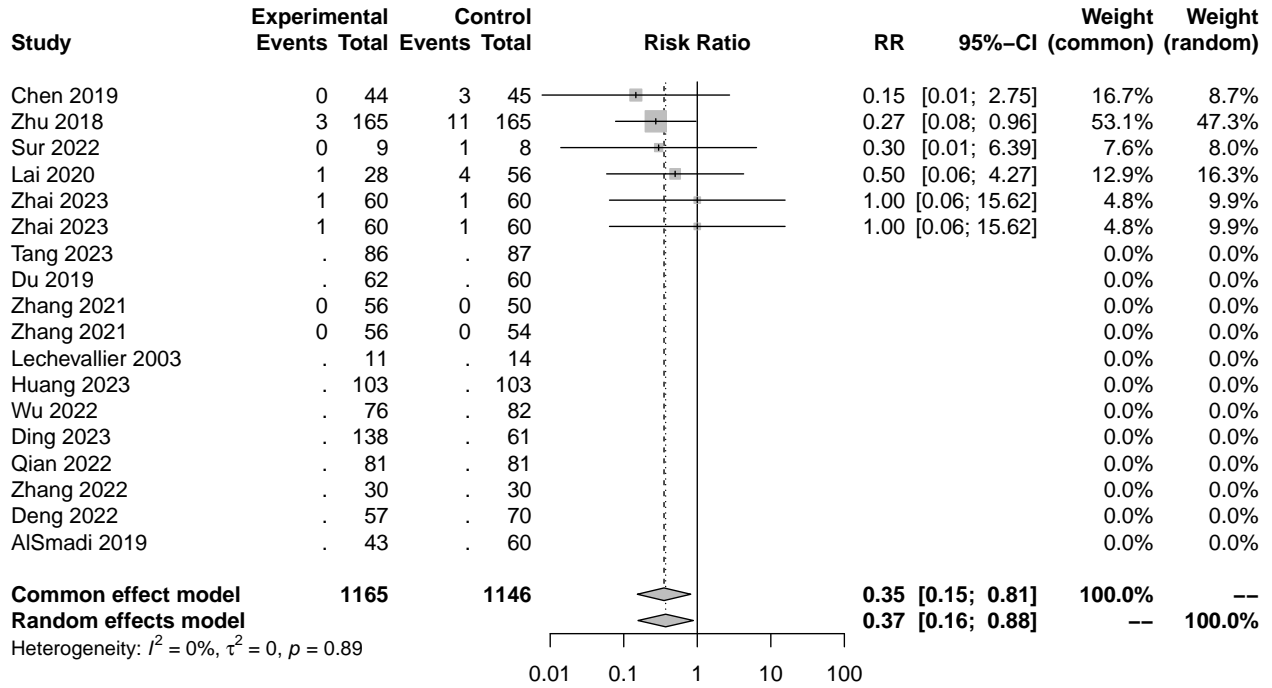

### 4.18.3 Trim and Fill

```
trimfill(clav_ii_metabin)
```

```
## Warning in trimfill.meta(clav_ii_metabin): 12 observation(s) dropped due to
## missing values

## Number of studies: k = 7 (with 1 added studies)
## Number of observations: o = 880
## Number of events: e = 29
##
##                      RR          95%-CI      z p-value
## Random effects model 0.3331 [0.1460; 0.7602] -2.61  0.0090
##
## Quantifying heterogeneity:
## tau^2 = 0 [0.0000; 1.6913]; tau = 0 [0.0000; 1.3005]
## I^2 = 0.0% [0.0%; 70.8%]; H = 1.00 [1.00; 1.85]
##
## Test of heterogeneity:
##      Q d.f. p-value
## 2.39   6  0.8809
##
## Details on meta-analytical method:
## - Inverse variance method
## - Restricted maximum-likelihood estimator for tau^2
## - Q-Profile method for confidence interval of tau^2 and tau
## - Trim-and-fill method to adjust for funnel plot asymmetry (L-estimator)
```

```
forest(trimfill(clav_ii_metabin),
        sortvar = TE)
```

```
## Warning in trimfill.meta(clav_ii_metabin): 12 observation(s) dropped due to
## missing values
```

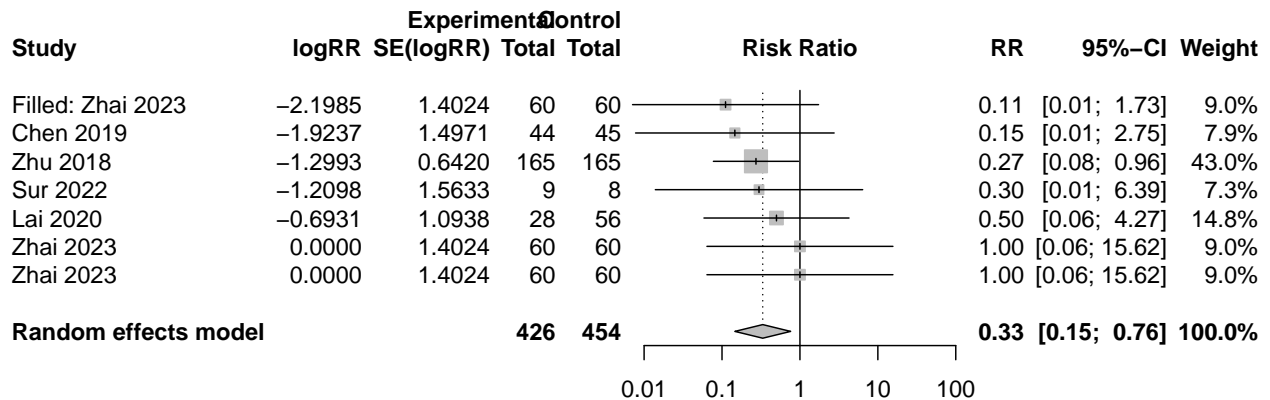

#### 4.18.4 Funnel plot

```
funnel(trimfill(clav_ii_metabin))
```

```
## Warning in trimfill.meta(clav_ii_metabin): 12 observation(s) dropped due to  
## missing values
```

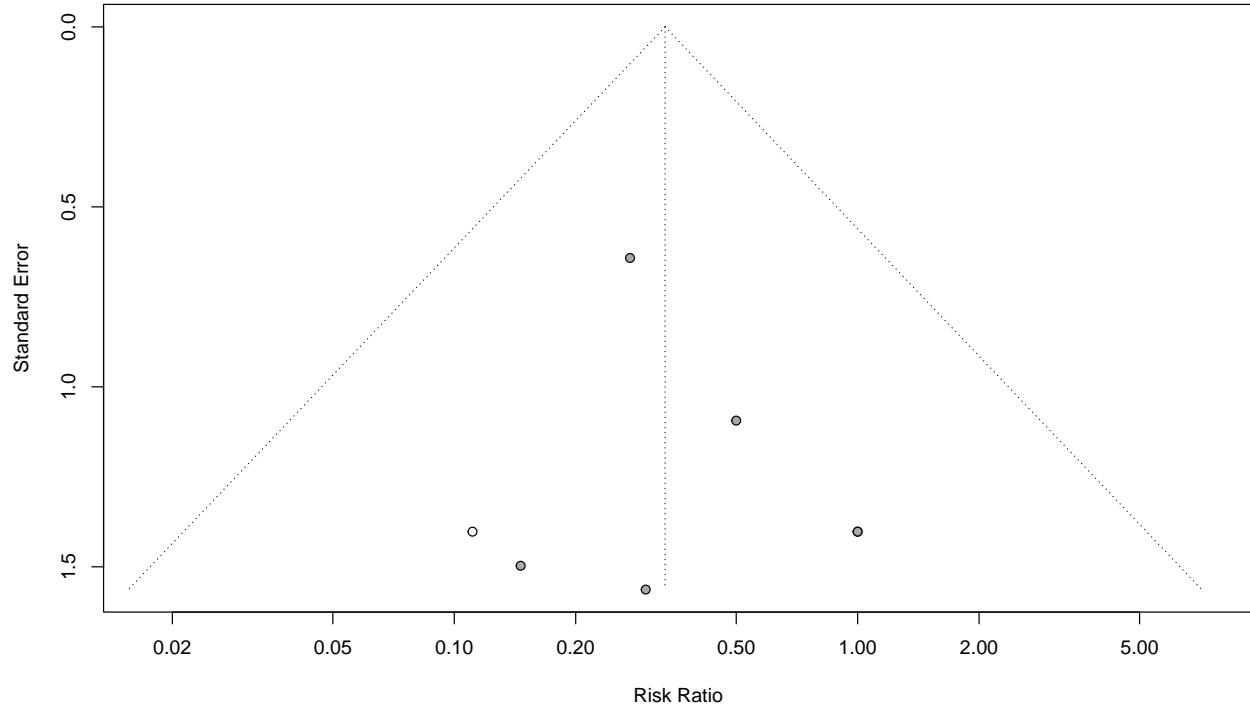

#### 4.18.5 Baujat

```
baujat(clav_ii_metabin, pos = 1)
```

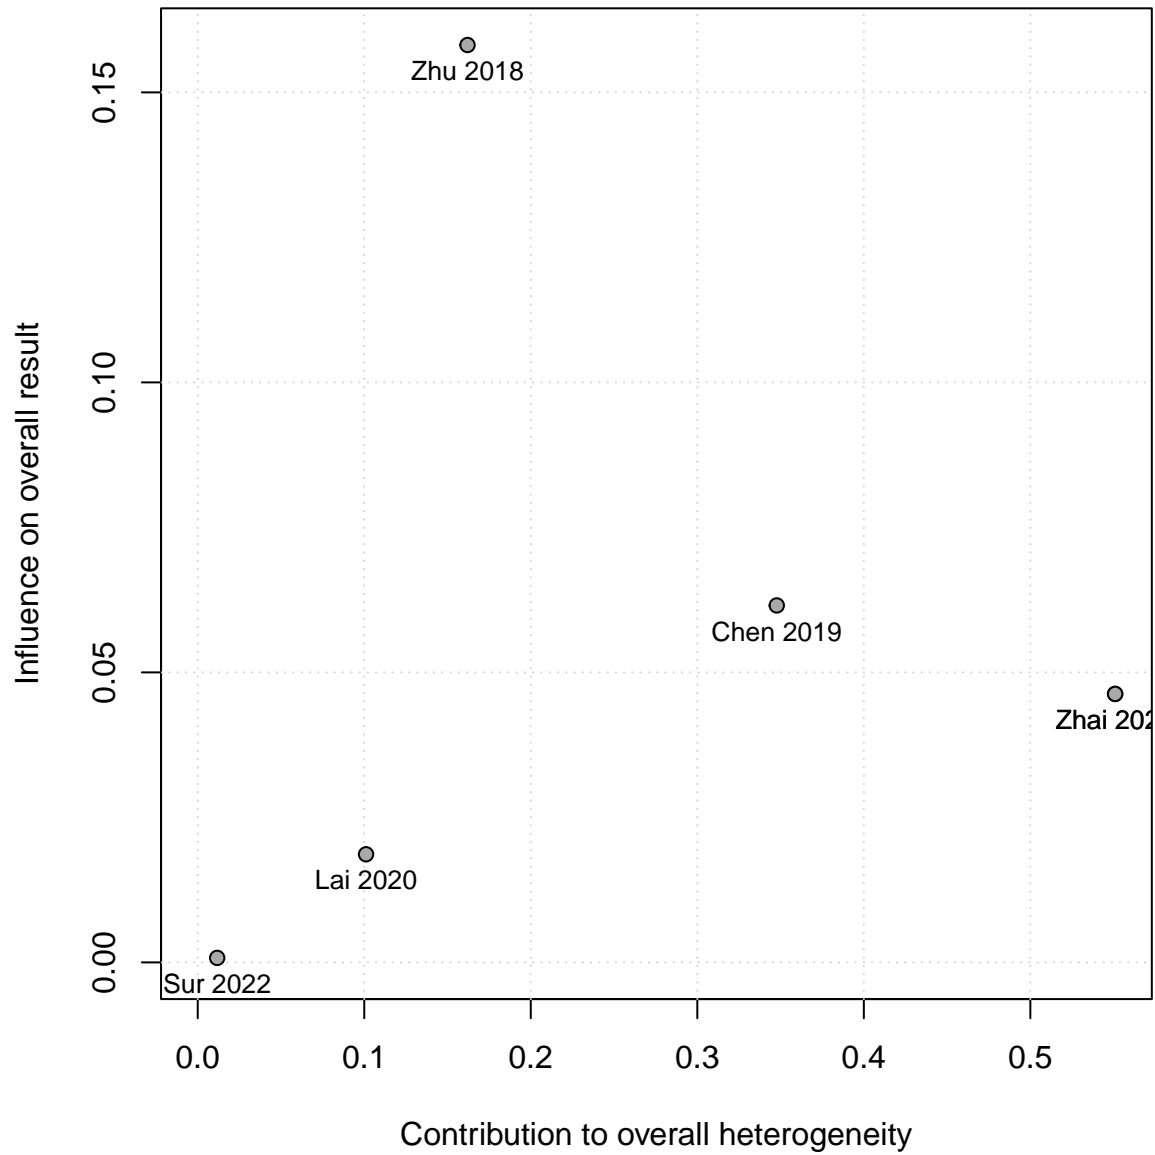



#### 4.18.6 Leave one out

```
metainf(clav_ii_metabin)
```

```
## Influential analysis (common effect model)
##
##
##          RR          95%-CI p-value  tau^2    tau
## Omitting Sur 2022      0.3575 [0.1500; 0.8524]  0.0203  0.0000  0.0000
## Omitting Tang 2023     0.3531 [0.1531; 0.8147]  0.0147  0.0000  0.0000
## Omitting Chen 2019     0.3947 [0.1638; 0.9509]  0.0382  0.0000  0.0000
## Omitting Du 2019       0.3531 [0.1531; 0.8147]  0.0147  0.0000  0.0000
## Omitting Lai 2020      0.3314 [0.1333; 0.8240]  0.0175  0.0000  0.0000
## Omitting Zhu 2018      0.4443 [0.1433; 1.3770]  0.1598  0.0000  0.0000
## Omitting Zhang 2021    0.3531 [0.1531; 0.8147]  0.0147  0.0000  0.0000
## Omitting Zhang 2021    0.3531 [0.1531; 0.8147]  0.0147  0.0000  0.0000
## Omitting Lechevallier 2003 0.3531 [0.1531; 0.8147]  0.0147  0.0000  0.0000
## Omitting Huang 2023    0.3531 [0.1531; 0.8147]  0.0147  0.0000  0.0000
## Omitting Wu 2022      0.3531 [0.1531; 0.8147]  0.0147  0.0000  0.0000
## Omitting Ding 2023     0.3531 [0.1531; 0.8147]  0.0147  0.0000  0.0000
## Omitting Zhai 2023     0.3203 [0.1317; 0.7790]  0.0121  0.0000  0.0000
## Omitting Zhai 2023     0.3203 [0.1317; 0.7790]  0.0121  0.0000  0.0000
## Omitting Qian 2022     0.3531 [0.1531; 0.8147]  0.0147  0.0000  0.0000
## Omitting Zhang 2022    0.3531 [0.1531; 0.8147]  0.0147  0.0000  0.0000
## Omitting Deng 2022     0.3531 [0.1531; 0.8147]  0.0147  0.0000  0.0000
## Omitting AlSmadi 2019  0.3531 [0.1531; 0.8147]  0.0147  0.0000  0.0000
##
## Pooled estimate      0.3531 [0.1531; 0.8147]  0.0147  0.0000  0.0000
##
##          I^2
## Omitting Sur 2022      0.0%
## Omitting Tang 2023     0.0%
## Omitting Chen 2019     0.0%
## Omitting Du 2019       0.0%
## Omitting Lai 2020      0.0%
## Omitting Zhu 2018      0.0%
## Omitting Zhang 2021    0.0%
## Omitting Zhang 2021    0.0%
## Omitting Lechevallier 2003 0.0%
## Omitting Huang 2023    0.0%
## Omitting Wu 2022      0.0%
## Omitting Ding 2023     0.0%
## Omitting Zhai 2023     0.0%
## Omitting Zhai 2023     0.0%
## Omitting Qian 2022     0.0%
## Omitting Zhang 2022    0.0%
## Omitting Deng 2022     0.0%
## Omitting AlSmadi 2019  0.0%
##
## Pooled estimate      0.0%
##
## Details on meta-analytical method:
## - Mantel-Haenszel method
## - Restricted maximum-likelihood estimator for tau^2
```

## 4.19 Clavien III

### 4.19.1 Meta-analysis

```
clav_iii_metabin <- metabin(data = suction_data,
                            event.c = clavien_iii_n_control,
                            n.c = sample_size_control,
                            event.e = clavien_iii_n_suction,
                            n.e = sample_size_suction,
                            studlab = author_year)

clav_iii_metabin

## Number of studies: k = 3
## Number of observations: o = 2311
## Number of events: e = 6
##
##              RR          95%-CI      z p-value
## Common effect model 0.7438 [0.1625; 3.4043] -0.38 0.7029
## Random effects model 0.7707 [0.1617; 3.6724] -0.33 0.7437
##
## Quantifying heterogeneity:
## tau^2 = 0 [0.0000; 12.9354]; tau = 0 [0.0000; 3.5966]
## I^2 = 0.0% [0.0%; 89.6%]; H = 1.00 [1.00; 3.10]
##
## Test of heterogeneity:
##   Q d.f. p-value
## 0.33  2 0.8458
##
## Details on meta-analytical method:
## - Mantel-Haenszel method
## - Inverse variance method
## - Restricted maximum-likelihood estimator for tau^2
## - Q-Profile method for confidence interval of tau^2 and tau
## - Continuity correction of 0.5 in studies with zero cell frequencies
```

### 4.19.2 Forest plot

```
forest(clav_iii_metabin,
       sortvar = TE)
```

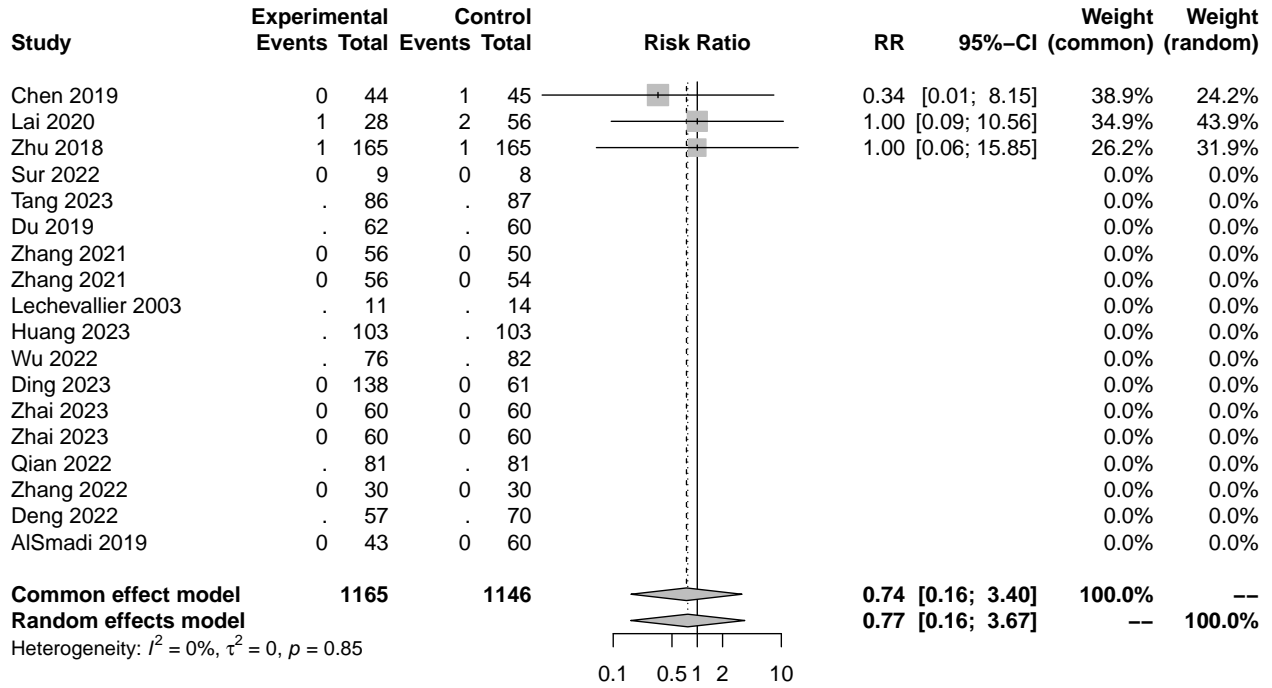

### 4.19.3 Trim and Fill

```
trimfill(clav_iii_metabin)
```

```
## Warning in trimfill.meta(clav_iii_metabin): 15 observation(s) dropped due to
## missing values

## Number of studies: k = 3 (with 0 added studies)
## Number of observations: o = 503
## Number of events: e = 6
##
##                RR          95%-CI      z p-value
## Random effects model 0.7707 [0.1617; 3.6724] -0.33 0.7437
##
## Quantifying heterogeneity:
## tau^2 = 0 [0.0000; 12.9354]; tau = 0 [0.0000; 3.5966]
## I^2 = 0.0% [0.0%; 89.6%]; H = 1.00 [1.00; 3.10]
##
## Test of heterogeneity:
##      Q d.f. p-value
## 0.33   2 0.8458
##
## Details on meta-analytical method:
## - Inverse variance method
## - Restricted maximum-likelihood estimator for tau^2
## - Q-Profile method for confidence interval of tau^2 and tau
## - Trim-and-fill method to adjust for funnel plot asymmetry (L-estimator)
```

```
forest(trimfill(clav_iii_metabin),
        sortvar = TE)
```

```
## Warning in trimfill.meta(clav_iii_metabin): 15 observation(s) dropped due to
## missing values
```

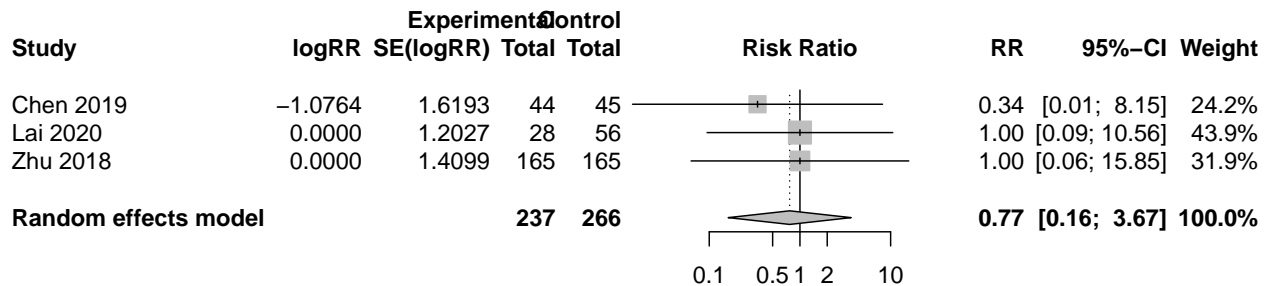

Heterogeneity:  $I^2 = 0\%$ ,  $\tau^2 = 0$ ,  $p = 0.85$

#### 4.19.4 Funnel plot

```
funnel(trimfill(clav_iii_metabin))
```

```
## Warning in trimfill.meta(clav_iii_metabin): 15 observation(s) dropped due to  
## missing values
```

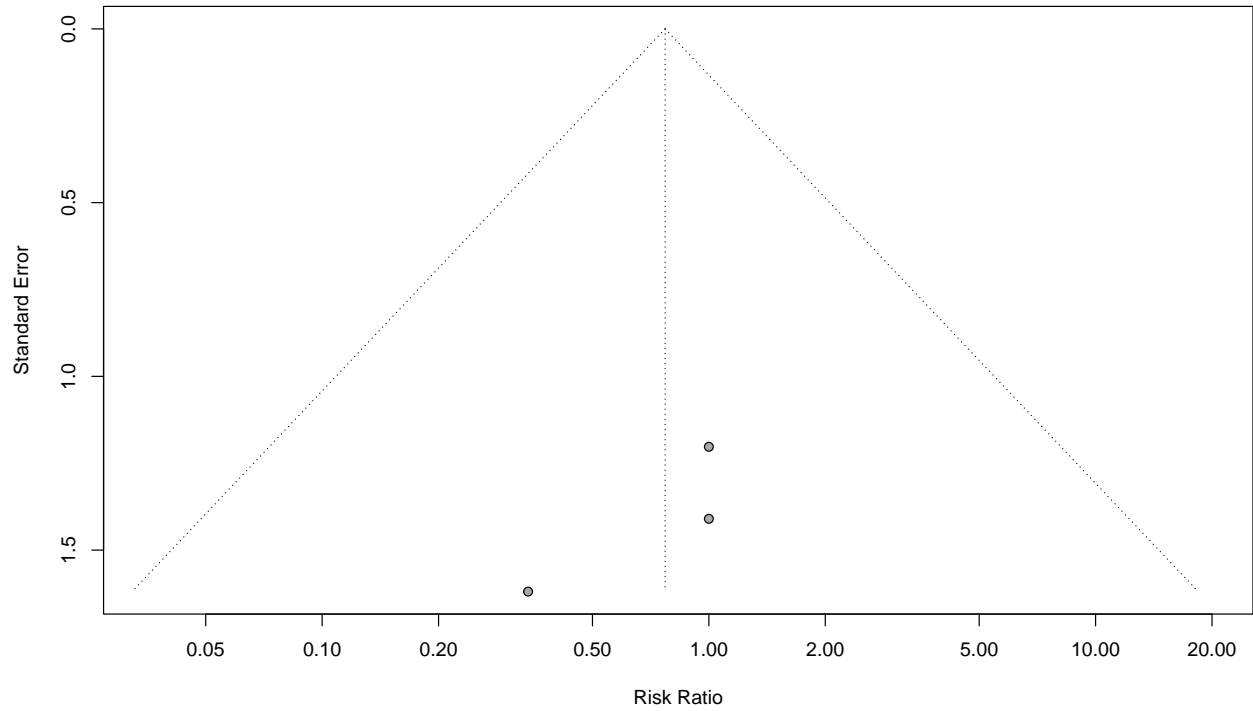

#### 4.19.5 Baujat

```
baujat(clav_iii_metabin, pos = 1)
```

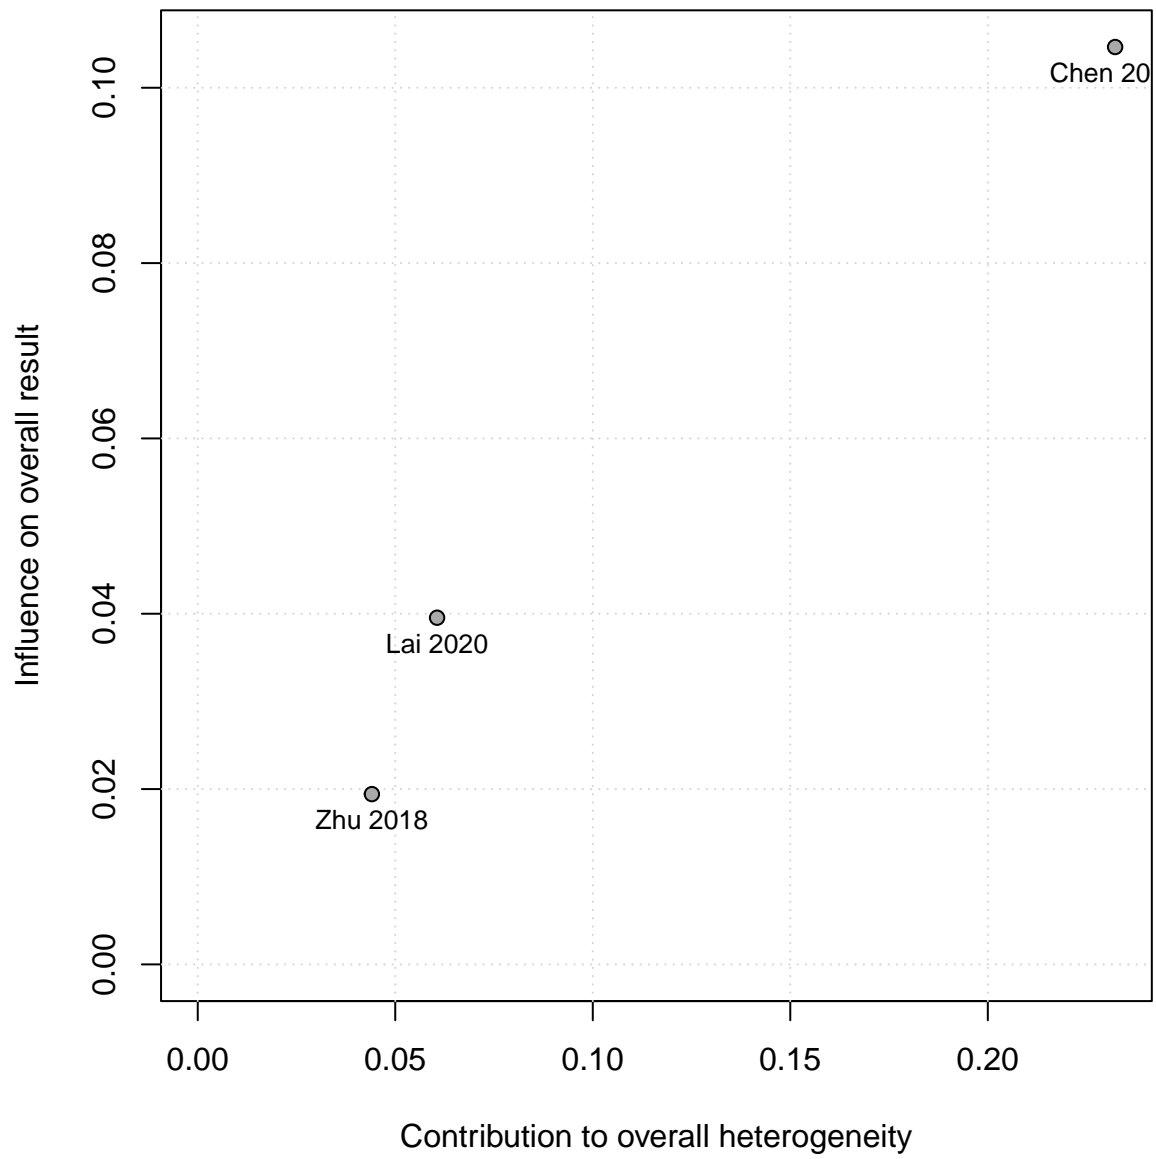

#### 4.19.6 Leave one out

```
metainf(clav_iii_metabin)
```

```
## Influential analysis (common effect model)
##
##
##          RR          95%-CI p-value  tau^2  tau
## Omitting Sur 2022      0.7438 [0.1625; 3.4043]  0.7029  0.0000  0.0000
## Omitting Tang 2023      0.7438 [0.1625; 3.4043]  0.7029  0.0000  0.0000
## Omitting Chen 2019      1.0000 [0.1664; 6.0109]  1.0000  0.0000  0.0000
## Omitting Du 2019        0.7438 [0.1625; 3.4043]  0.7029  0.0000  0.0000
## Omitting Lai 2020       0.6062 [0.0808; 4.5502]  0.6265  0.0000  0.0000
## Omitting Zhu 2018       0.6528 [0.1042; 4.0882]  0.6487  0.0000  0.0000
## Omitting Zhang 2021     0.7438 [0.1625; 3.4043]  0.7029  0.0000  0.0000
## Omitting Zhang 2021     0.7438 [0.1625; 3.4043]  0.7029  0.0000  0.0000
## Omitting Lechevallier 2003 0.7438 [0.1625; 3.4043]  0.7029  0.0000  0.0000
## Omitting Huang 2023     0.7438 [0.1625; 3.4043]  0.7029  0.0000  0.0000
## Omitting Wu 2022       0.7438 [0.1625; 3.4043]  0.7029  0.0000  0.0000
## Omitting Ding 2023     0.7438 [0.1625; 3.4043]  0.7029  0.0000  0.0000
## Omitting Zhai 2023     0.7438 [0.1625; 3.4043]  0.7029  0.0000  0.0000
## Omitting Zhai 2023     0.7438 [0.1625; 3.4043]  0.7029  0.0000  0.0000
## Omitting Qian 2022     0.7438 [0.1625; 3.4043]  0.7029  0.0000  0.0000
## Omitting Zhang 2022     0.7438 [0.1625; 3.4043]  0.7029  0.0000  0.0000
## Omitting Deng 2022     0.7438 [0.1625; 3.4043]  0.7029  0.0000  0.0000
## Omitting AlSmadi 2019   0.7438 [0.1625; 3.4043]  0.7029  0.0000  0.0000
##
## Pooled estimate      0.7438 [0.1625; 3.4043]  0.7029  0.0000  0.0000
##
##          I^2
## Omitting Sur 2022      0.0%
## Omitting Tang 2023     0.0%
## Omitting Chen 2019     0.0%
## Omitting Du 2019       0.0%
## Omitting Lai 2020      0.0%
## Omitting Zhu 2018      0.0%
## Omitting Zhang 2021    0.0%
## Omitting Zhang 2021    0.0%
## Omitting Lechevallier 2003 0.0%
## Omitting Huang 2023    0.0%
## Omitting Wu 2022       0.0%
## Omitting Ding 2023     0.0%
## Omitting Zhai 2023     0.0%
## Omitting Zhai 2023     0.0%
## Omitting Qian 2022     0.0%
## Omitting Zhang 2022    0.0%
## Omitting Deng 2022     0.0%
## Omitting AlSmadi 2019  0.0%
##
## Pooled estimate      0.0%
##
## Details on meta-analytical method:
## - Mantel-Haenszel method
## - Restricted maximum-likelihood estimator for tau^2
```

## 4.20 Clavien IV

### 4.20.1 Meta-analysis

```
clav_iv_metabin <- metabin(data = suction_data,
                           event.c = clavien_iv_n_control,
                           n.c = sample_size_control,
                           event.e = clavien_iv_n_suction,
                           n.e = sample_size_suction,
                           studlab = author_year)

clav_iv_metabin

## Number of studies: k = 1
## Number of observations: o = 2311
## Number of events: e = 4
##
##              RR          95%-CI      z p-value
## Common effect model 0.3333 [0.0350; 3.1716] -0.96 0.3392
## Random effects model 0.3333 [0.0350; 3.1716] -0.96 0.3392
##
## Quantifying heterogeneity:
## tau^2 = NA; tau = NA; I^2 = NA; H = NA
##
## Details on meta-analytical method:
## - Mantel-Haenszel method
## - Inverse variance method
## - Restricted maximum-likelihood estimator for tau^2
```



#### 4.20.2 Forest plot

```
forest(clav_iv_metabin,
       sortvar = TE)
```

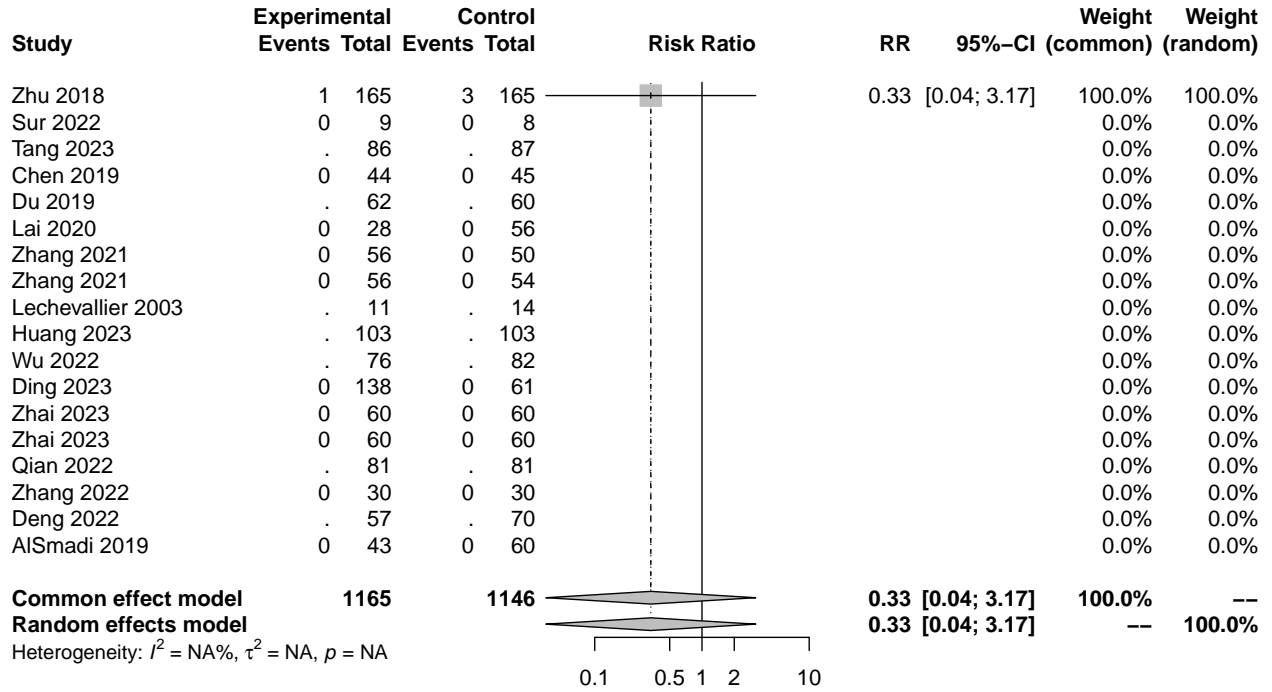

### 4.20.3 Trim and Fill

```
#trimfill(clav_iv_metabin)  
#forest(trimfill(clav_iv_metabin),  
#      sortvar = TE)
```

#### 4.20.4 Funnel plot

```
funnel((clav_iv_metabin))
```

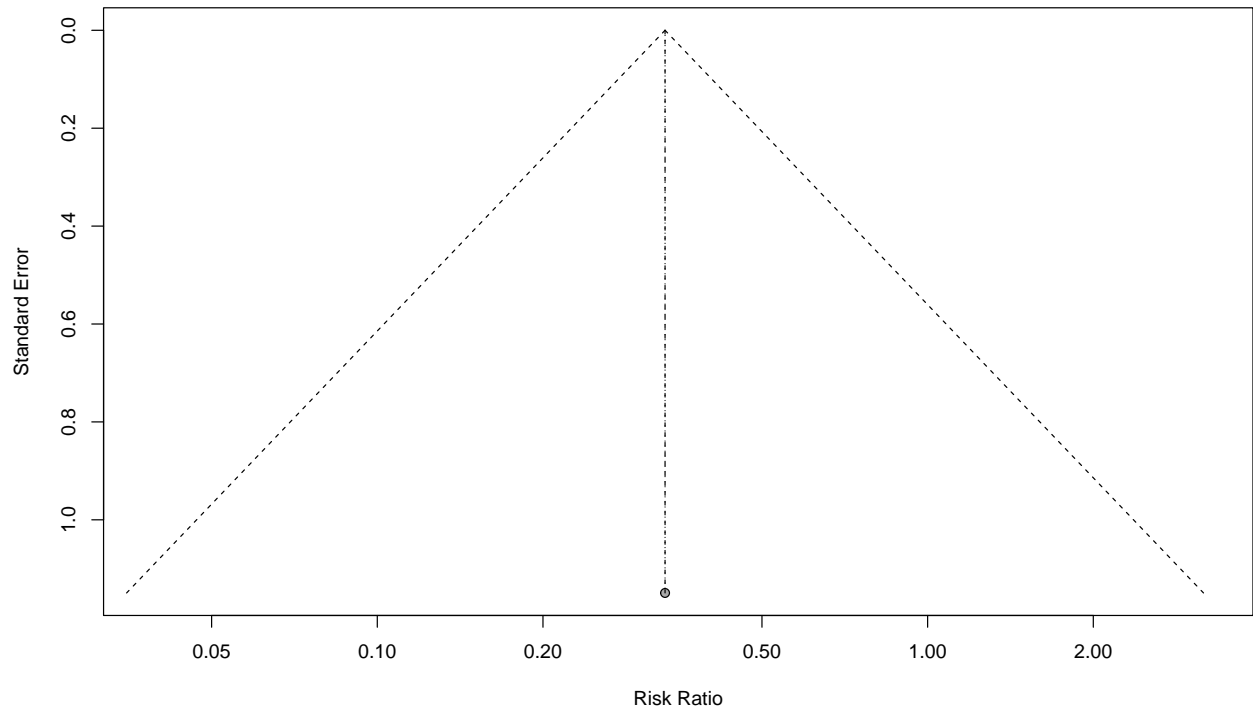

#### 4.20.5 Baujat

```
baujat(clav_iv_metabin, pos = 1)
```

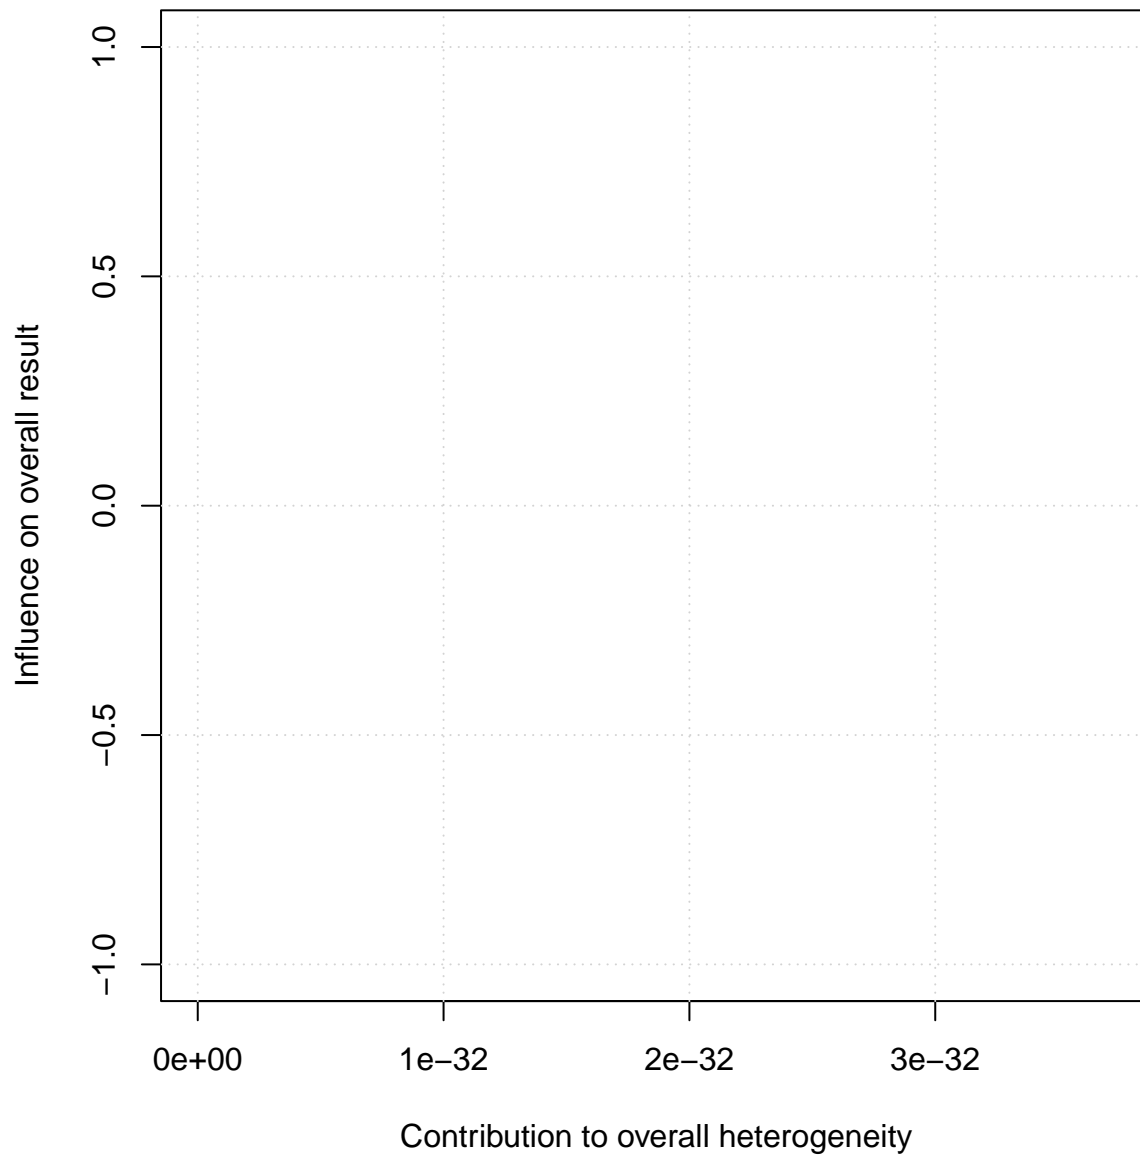

#### 4.20.6 Leave one out

```
metainf(clav_iv_metabin)
```

```
## Influential analysis (common effect model)
##
##
##          RR          95%-CI p-value tau^2 tau I^2
## Omitting Sur 2022      0.3333 [0.0350; 3.1716] 0.3392
## Omitting Tang 2023     0.3333 [0.0350; 3.1716] 0.3392
## Omitting Chen 2019     0.3333 [0.0350; 3.1716] 0.3392
## Omitting Du 2019       0.3333 [0.0350; 3.1716] 0.3392
## Omitting Lai 2020      0.3333 [0.0350; 3.1716] 0.3392
## Omitting Zhu 2018
## Omitting Zhang 2021    0.3333 [0.0350; 3.1716] 0.3392
## Omitting Zhang 2021    0.3333 [0.0350; 3.1716] 0.3392
## Omitting Lechevallier 2003 0.3333 [0.0350; 3.1716] 0.3392
## Omitting Huang 2023    0.3333 [0.0350; 3.1716] 0.3392
## Omitting Wu 2022       0.3333 [0.0350; 3.1716] 0.3392
## Omitting Ding 2023     0.3333 [0.0350; 3.1716] 0.3392
## Omitting Zhai 2023     0.3333 [0.0350; 3.1716] 0.3392
## Omitting Zhai 2023     0.3333 [0.0350; 3.1716] 0.3392
## Omitting Qian 2022     0.3333 [0.0350; 3.1716] 0.3392
## Omitting Zhang 2022    0.3333 [0.0350; 3.1716] 0.3392
## Omitting Deng 2022     0.3333 [0.0350; 3.1716] 0.3392
## Omitting AlSmadi 2019  0.3333 [0.0350; 3.1716] 0.3392
##
## Pooled estimate      0.3333 [0.0350; 3.1716] 0.3392
##
## Details on meta-analytical method:
## - Mantel-Haenszel method
## - Restricted maximum-likelihood estimator for tau^2
```

## 4.21 Clavien V

### 4.21.1 Meta-analysis

```
clav_v_metabin <- metabin(data = suction_data,
                          event.c = clavien_v_n_control,
                          n.c = sample_size_control,
                          event.e = clavien_v_n_suction,
                          n.e = sample_size_suction,
                          studlab = author_year)
```

```
clav_v_metabin
```

```
## Number of studies: k = 0
## Number of observations: o = 2311
## Number of events: e = 0
##
##                RR 95%-CI  z p-value
## Common effect model  NA      --      --
## Random effects model NA      --      --
##
## Quantifying heterogeneity:
## tau^2 = NA; tau = NA; I^2 = NA; H = NA
##
## Details on meta-analytical method:
## - Mantel-Haenszel method
## - Inverse variance method
## - Restricted maximum-likelihood estimator for tau^2
```

#### 4.21.2 Forest plot

```
#forest(clav_v_metabin,  
#       sortvar = TE)
```

### 4.21.3 Trim and Fill

```
#trimfill(clav_v_metabin)  
#forest(trimfill(clav_v_metabin),  
#      sortvar = TE)
```



#### 4.21.4 Funnel plot

```
#funnel(trimfill(clav_v_metabin))
```

#### 4.21.5 Baujat

```
#baujat(clav_v_metabin, pos = 1)
```

#### 4.21.6 Leave one out

```
#metainf(clav_v_metabin)
```

## 4.22 Clavien I-II

### 4.22.1 Meta-analysis

```
clav_i_ii_metabin <- metabin(data = suction_data,
                             event.c = clav_i_ii_n_control,
                             n.c = sample_size_control,
                             event.e = clav_i_ii_n_suction,
                             n.e = sample_size_suction,
                             studlab = author_year)

clav_i_ii_metabin

## Number of studies: k = 8
## Number of observations: o = 2311
## Number of events: e = 119
##
##              RR          95%-CI      z p-value
## Common effect model 0.5274 [0.3686; 0.7545] -3.50 0.0005
## Random effects model 0.5276 [0.3677; 0.7570] -3.47 0.0005
##
## Quantifying heterogeneity:
## tau^2 = 0 [0.0000; 0.0306]; tau = 0 [0.0000; 0.1749]
## I^2 = 0.0% [0.0%; 67.6%]; H = 1.00 [1.00; 1.76]
##
## Test of heterogeneity:
##      Q d.f. p-value
## 1.90   7 0.9651
##
## Details on meta-analytical method:
## - Mantel-Haenszel method
## - Inverse variance method
## - Restricted maximum-likelihood estimator for tau^2
## - Q-Profile method for confidence interval of tau^2 and tau
```

### 4.2.2.2 Forest plot

```
forest(clav_i_ii_metabin,
       sortvar = TE)
```

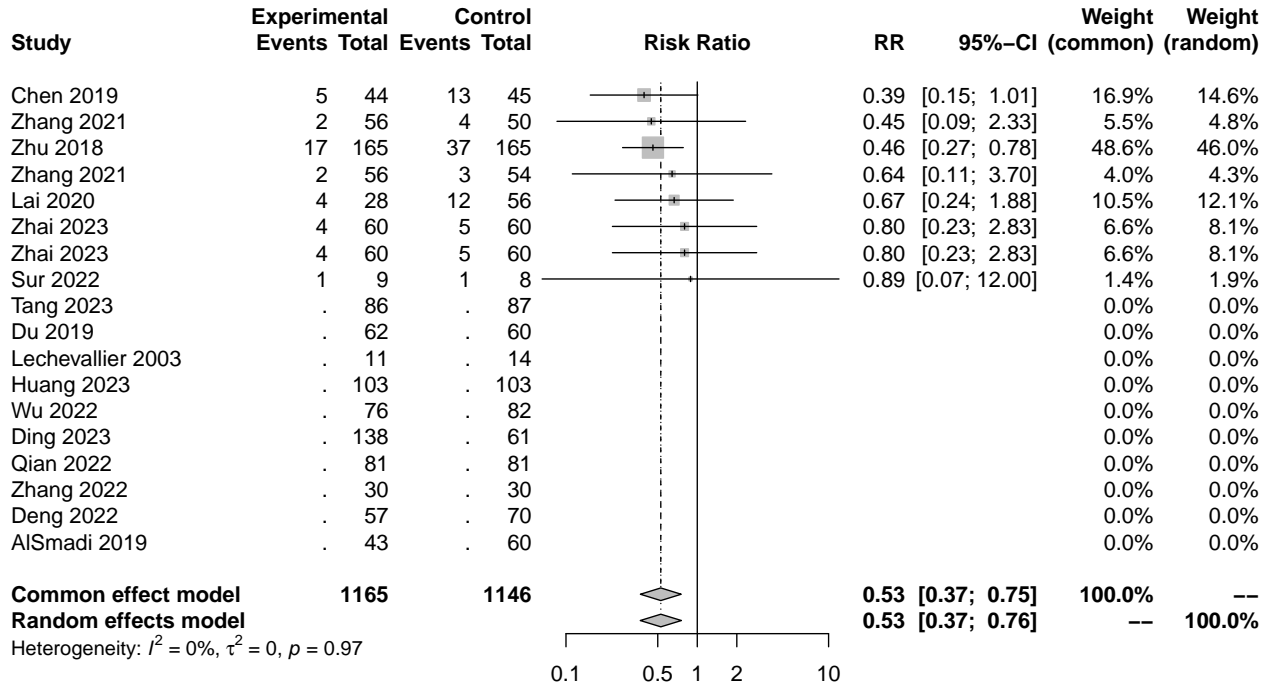

### 4.22.3 Trim and Fill

```
trimfill(clav_i_ii_metabin)
```

```
## Warning in trimfill.meta(clav_i_ii_metabin): 10 observation(s) dropped due to
## missing values

## Number of studies: k = 11 (with 3 added studies)
## Number of observations: o = 1233
## Number of events: e = 139
##
##                      RR          95%-CI      z p-value
## Random effects model 0.4798 [0.3442; 0.6687] -4.34 < 0.0001
##
## Quantifying heterogeneity:
## tau^2 = 0 [0.0000; 0.0505]; tau = 0 [0.0000; 0.2246]
## I^2 = 0.0% [0.0%; 60.2%]; H = 1.00 [1.00; 1.59]
##
## Test of heterogeneity:
##   Q d.f. p-value
## 3.64 10 0.9622
##
## Details on meta-analytical method:
## - Inverse variance method
## - Restricted maximum-likelihood estimator for tau^2
## - Q-Profile method for confidence interval of tau^2 and tau
## - Trim-and-fill method to adjust for funnel plot asymmetry (L-estimator)
```

```
forest(trimfill(clav_i_ii_metabin),
        sortvar = TE)
```

```
## Warning in trimfill.meta(clav_i_ii_metabin): 10 observation(s) dropped due to
## missing values
```

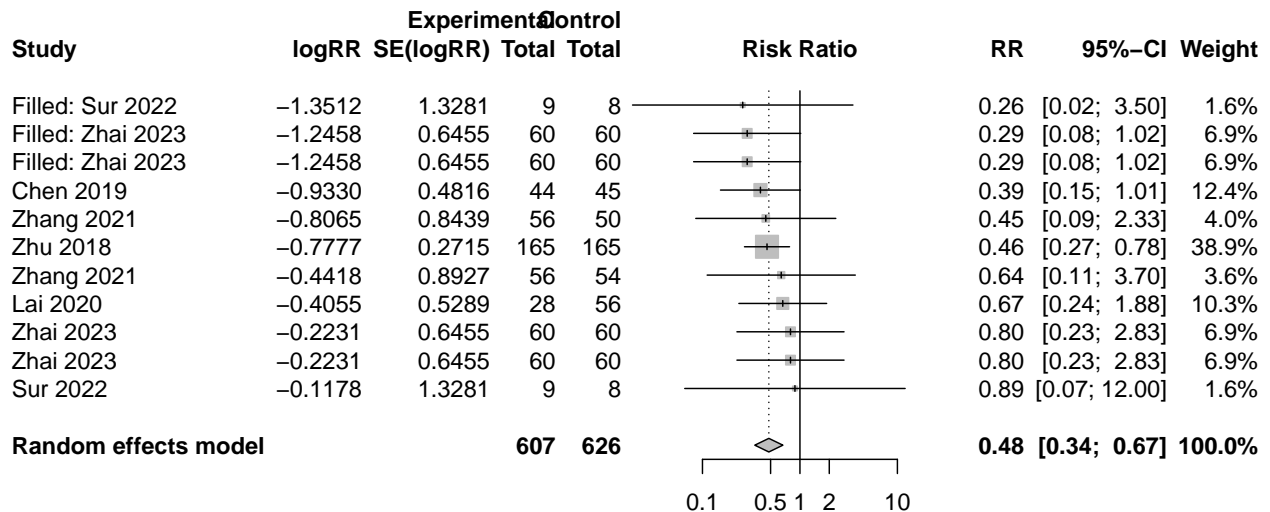

#### 4.22.4 Funnel plot

```
funnel(trimfill(clav_i_ii_metabin))
```

```
## Warning in trimfill.meta(clav_i_ii_metabin): 10 observation(s) dropped due to  
## missing values
```

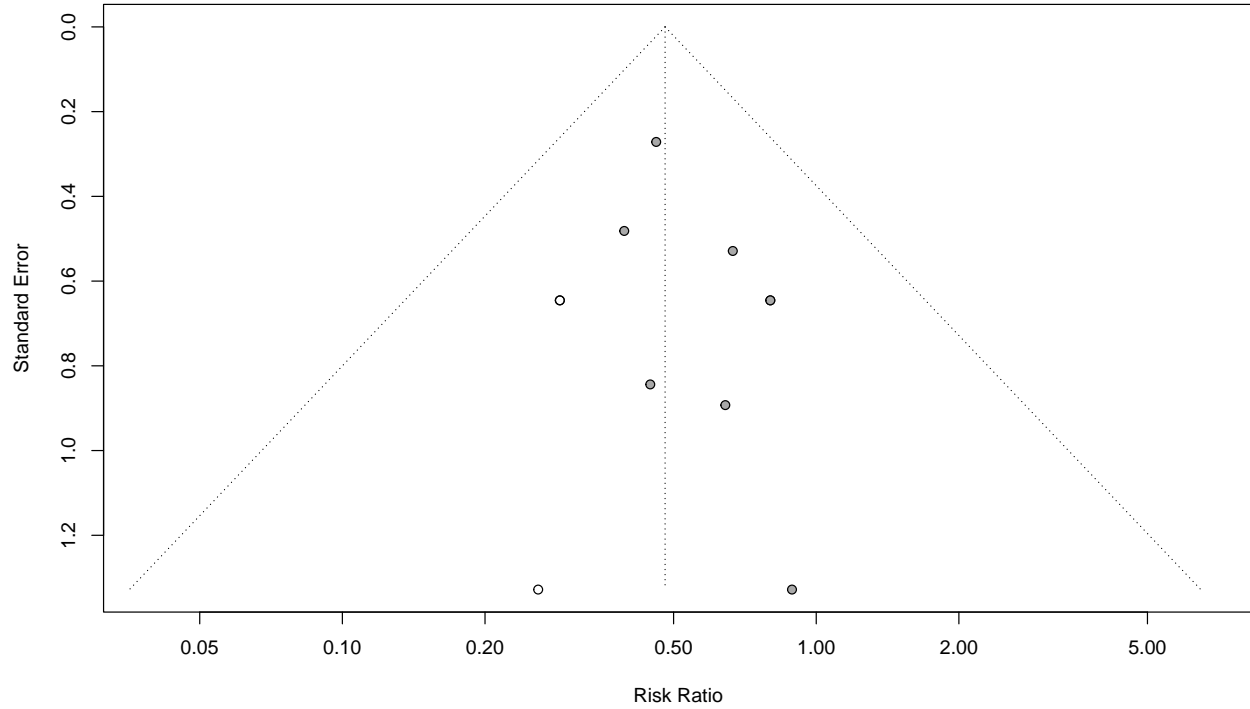

#### 4.22.5 Baujat

```
baujat(clav_i_ii_metabin, pos = 1)
```

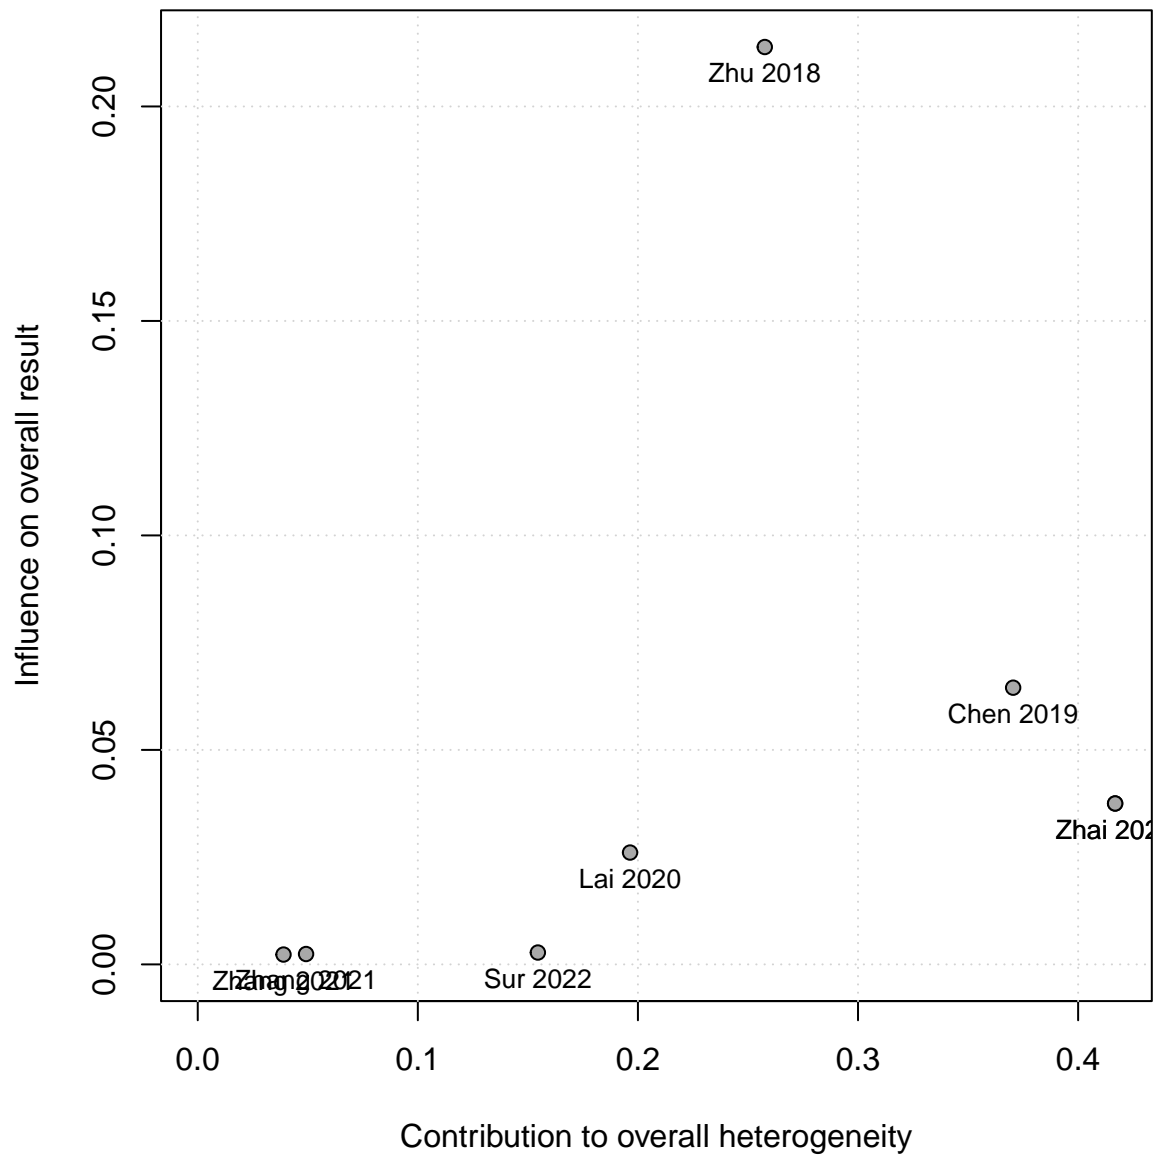



#### 4.22.6 Leave one out

```
metainf(clav_i_ii_metabin)
```

```
## Influential analysis (common effect model)
##
##
##          RR          95%-CI p-value  tau^2  tau
## Omitting Sur 2022      0.5223 [0.3637; 0.7500] 0.0004 0.0000 0.0000
## Omitting Tang 2023      0.5274 [0.3686; 0.7545] 0.0005 0.0000 0.0000
## Omitting Chen 2019      0.5545 [0.3762; 0.8174] 0.0029 0.0000 0.0000
## Omitting Du 2019        0.5274 [0.3686; 0.7545] 0.0005 0.0000 0.0000
## Omitting Lai 2020       0.5110 [0.3487; 0.7488] 0.0006 0.0000 0.0000
## Omitting Zhu 2018       0.5914 [0.3637; 0.9617] 0.0342 0.0000 0.0000
## Omitting Zhang 2021     0.5321 [0.3687; 0.7680] 0.0008 0.0000 0.0000
## Omitting Zhang 2021     0.5225 [0.3624; 0.7535] 0.0005 0.0000 0.0000
## Omitting Lechevallier 2003 0.5274 [0.3686; 0.7545] 0.0005 0.0000 0.0000
## Omitting Huang 2023     0.5274 [0.3686; 0.7545] 0.0005 0.0000 0.0000
## Omitting Wu 2022        0.5274 [0.3686; 0.7545] 0.0005 0.0000 0.0000
## Omitting Ding 2023      0.5274 [0.3686; 0.7545] 0.0005 0.0000 0.0000
## Omitting Zhai 2023      0.5082 [0.3495; 0.7389] 0.0004 0.0000 0.0000
## Omitting Zhai 2023      0.5082 [0.3495; 0.7389] 0.0004 0.0000 0.0000
## Omitting Qian 2022      0.5274 [0.3686; 0.7545] 0.0005 0.0000 0.0000
## Omitting Zhang 2022     0.5274 [0.3686; 0.7545] 0.0005 0.0000 0.0000
## Omitting Deng 2022      0.5274 [0.3686; 0.7545] 0.0005 0.0000 0.0000
## Omitting AlSmadi 2019   0.5274 [0.3686; 0.7545] 0.0005 0.0000 0.0000
##
## Pooled estimate      0.5274 [0.3686; 0.7545] 0.0005 0.0000 0.0000
##
##          I^2
## Omitting Sur 2022      0.0%
## Omitting Tang 2023      0.0%
## Omitting Chen 2019      0.0%
## Omitting Du 2019        0.0%
## Omitting Lai 2020       0.0%
## Omitting Zhu 2018       0.0%
## Omitting Zhang 2021     0.0%
## Omitting Zhang 2021     0.0%
## Omitting Lechevallier 2003 0.0%
## Omitting Huang 2023     0.0%
## Omitting Wu 2022        0.0%
## Omitting Ding 2023      0.0%
## Omitting Zhai 2023      0.0%
## Omitting Zhai 2023      0.0%
## Omitting Qian 2022      0.0%
## Omitting Zhang 2022     0.0%
## Omitting Deng 2022      0.0%
## Omitting AlSmadi 2019   0.0%
##
## Pooled estimate      0.0%
##
## Details on meta-analytical method:
## - Mantel-Haenszel method
## - Restricted maximum-likelihood estimator for tau^2
```

## 4.23 Clavien III-V

### 4.23.1 Meta-analysis

```
clav_iii_v_metabin <- metabin(data = suction_data,
                             event.c = clav_iii_v_n_control,
                             n.c = sample_size_control,
                             event.e = clav_iii_v_n_suction,
                             n.e = sample_size_suction,
                             studlab = author_year)

clav_iii_v_metabin

## Number of studies: k = 3
## Number of observations: o = 2311
## Number of events: e = 10
##
##              RR          95%-CI      z p-value
## Common effect model 0.5631 [0.1633; 1.9422] -0.91 0.3633
## Random effects model 0.5735 [0.1630; 2.0175] -0.87 0.3863
##
## Quantifying heterogeneity:
## tau^2 = 0 [0.0000; 9.8745]; tau = 0 [0.0000; 3.1424]
## I^2 = 0.0% [0.0%; 89.6%]; H = 1.00 [1.00; 3.10]
##
## Test of heterogeneity:
##      Q d.f. p-value
## 0.34  2 0.8426
##
## Details on meta-analytical method:
## - Mantel-Haenszel method
## - Inverse variance method
## - Restricted maximum-likelihood estimator for tau^2
## - Q-Profile method for confidence interval of tau^2 and tau
## - Continuity correction of 0.5 in studies with zero cell frequencies
```

### 4.23.2 Forest plot

```
forest(clav_iii_v_metabin,
       sortvar = TE)
```

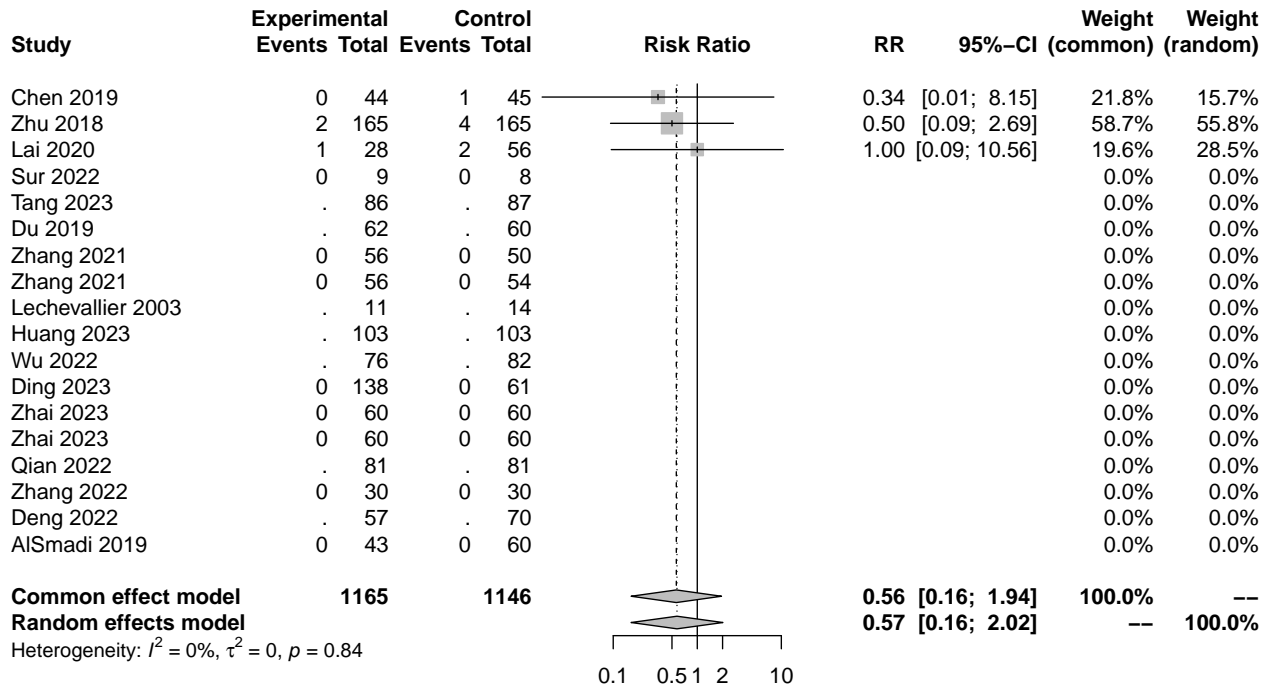

### 4.23.3 Trim and Fill

```
trimfill(clav_iii_v_metabin)
```

```
## Warning in trimfill.meta(clav_iii_v_metabin): 15 observation(s) dropped due to
## missing values

## Number of studies: k = 3 (with 0 added studies)
## Number of observations: o = 503
## Number of events: e = 10
##
##                      RR          95%-CI      z p-value
## Random effects model 0.5735 [0.1630; 2.0175] -0.87  0.3863
##
## Quantifying heterogeneity:
## tau^2 = 0 [0.0000; 9.8745]; tau = 0 [0.0000; 3.1424]
## I^2 = 0.0% [0.0%; 89.6%]; H = 1.00 [1.00; 3.10]
##
## Test of heterogeneity:
##      Q d.f. p-value
## 0.34   2  0.8426
##
## Details on meta-analytical method:
## - Inverse variance method
## - Restricted maximum-likelihood estimator for tau^2
## - Q-Profile method for confidence interval of tau^2 and tau
## - Trim-and-fill method to adjust for funnel plot asymmetry (L-estimator)
```

```
forest(trimfill(clav_iii_v_metabin),
        sortvar = TE)
```

```
## Warning in trimfill.meta(clav_iii_v_metabin): 15 observation(s) dropped due to
## missing values
```

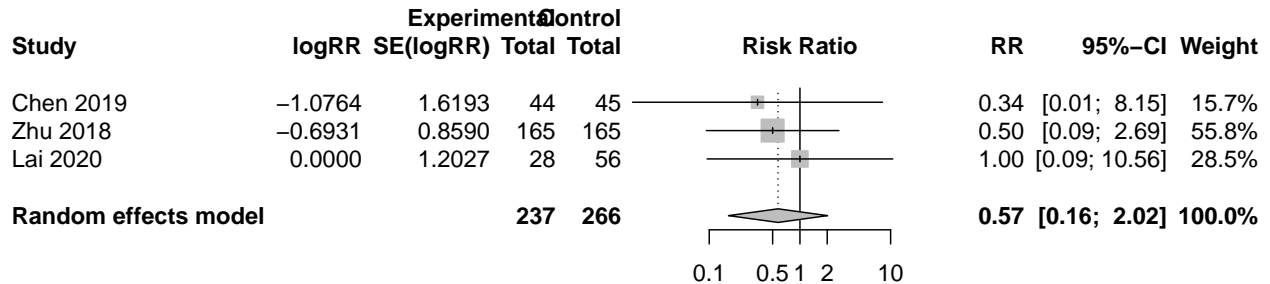

#### 4.23.4 Funnel plot

```
funnel(trimfill(clav_iii_v_metabin))
```

```
## Warning in trimfill.meta(clav_iii_v_metabin): 15 observation(s) dropped due to  
## missing values
```

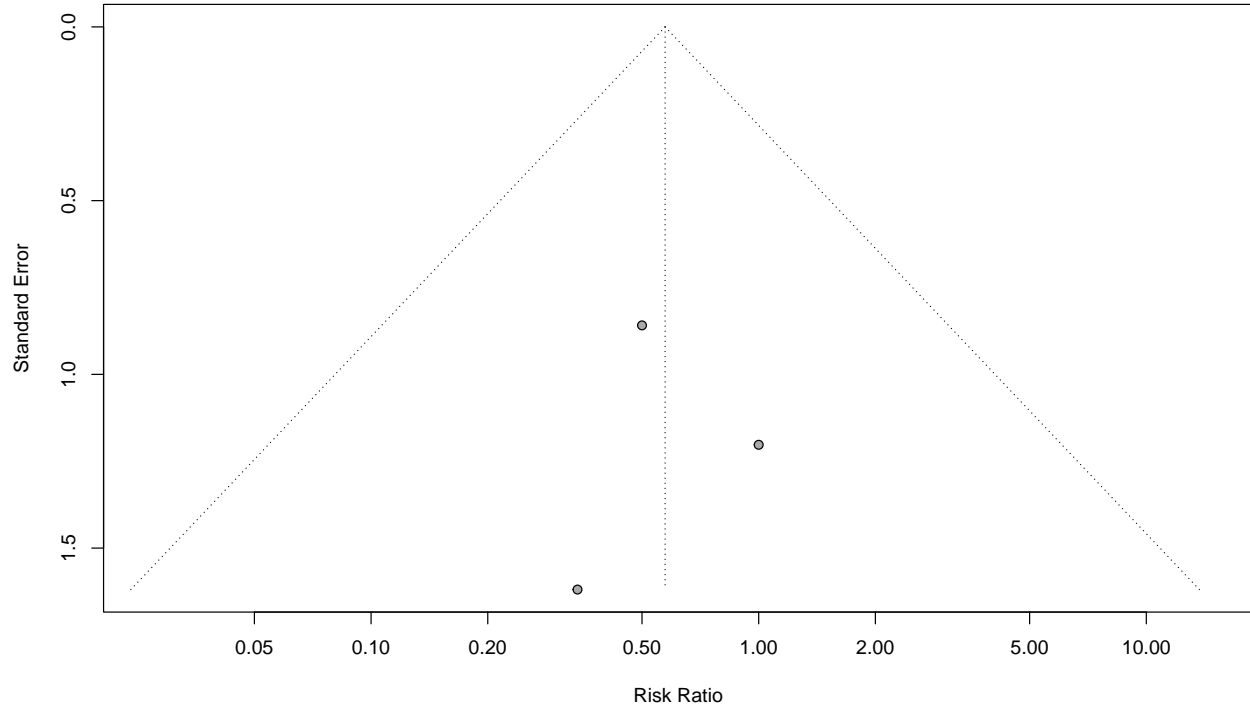

#### 4.23.5 Baujat

```
baujat(clav_iii_v_metabin, pos = 1)
```

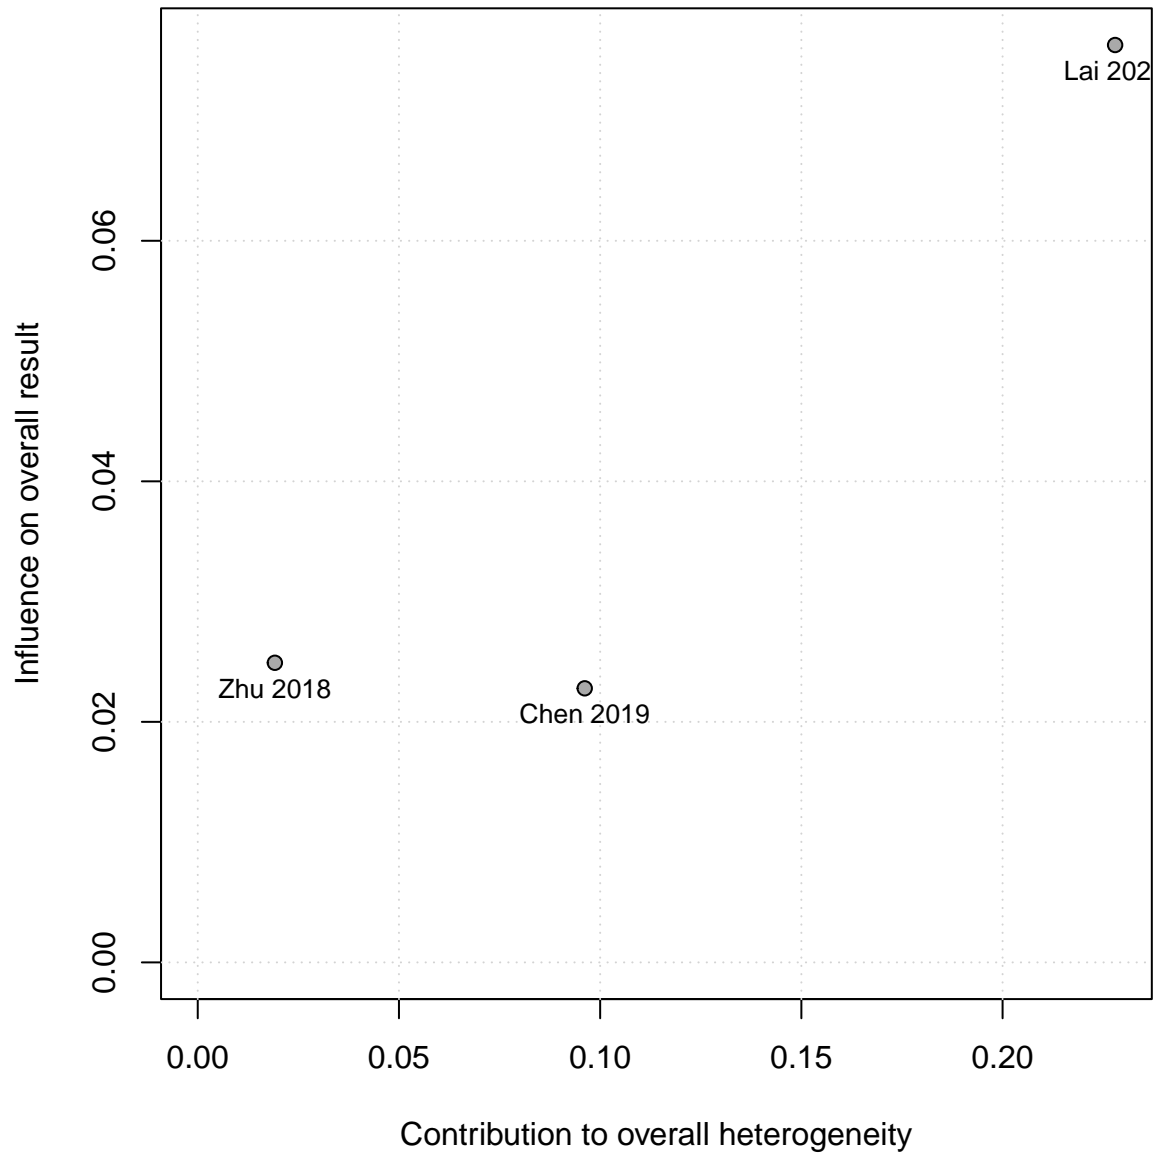

#### 4.23.6 Leave one out

```
metainf(clav_iii_v_metabin)
```

```
## Influential analysis (common effect model)
##
##          RR          95%-CI p-value  tau^2    tau
## Omitting Sur 2022      0.5631 [0.1633; 1.9422]  0.3633  0.0000  0.0000
## Omitting Tang 2023     0.5631 [0.1633; 1.9422]  0.3633  0.0000  0.0000
## Omitting Chen 2019     0.6250 [0.1615; 2.4186]  0.4960  0.0000  0.0000
## Omitting Du 2019       0.5631 [0.1633; 1.9422]  0.3633  0.0000  0.0000
## Omitting Lai 2020      0.4569 [0.1037; 2.0140]  0.3007  0.0000  0.0000
## Omitting Zhu 2018      0.6528 [0.1042; 4.0882]  0.6487  0.0000  0.0000
## Omitting Zhang 2021    0.5631 [0.1633; 1.9422]  0.3633  0.0000  0.0000
## Omitting Zhang 2021    0.5631 [0.1633; 1.9422]  0.3633  0.0000  0.0000
## Omitting Lechevallier 2003 0.5631 [0.1633; 1.9422]  0.3633  0.0000  0.0000
## Omitting Huang 2023    0.5631 [0.1633; 1.9422]  0.3633  0.0000  0.0000
## Omitting Wu 2022       0.5631 [0.1633; 1.9422]  0.3633  0.0000  0.0000
## Omitting Ding 2023     0.5631 [0.1633; 1.9422]  0.3633  0.0000  0.0000
## Omitting Zhai 2023     0.5631 [0.1633; 1.9422]  0.3633  0.0000  0.0000
## Omitting Zhai 2023     0.5631 [0.1633; 1.9422]  0.3633  0.0000  0.0000
## Omitting Qian 2022     0.5631 [0.1633; 1.9422]  0.3633  0.0000  0.0000
## Omitting Zhang 2022    0.5631 [0.1633; 1.9422]  0.3633  0.0000  0.0000
## Omitting Deng 2022    0.5631 [0.1633; 1.9422]  0.3633  0.0000  0.0000
## Omitting AlSmadi 2019  0.5631 [0.1633; 1.9422]  0.3633  0.0000  0.0000
##
## Pooled estimate      0.5631 [0.1633; 1.9422]  0.3633  0.0000  0.0000
##          I^2
## Omitting Sur 2022      0.0%
## Omitting Tang 2023     0.0%
## Omitting Chen 2019     0.0%
## Omitting Du 2019       0.0%
## Omitting Lai 2020      0.0%
## Omitting Zhu 2018      0.0%
## Omitting Zhang 2021    0.0%
## Omitting Zhang 2021    0.0%
## Omitting Lechevallier 2003 0.0%
## Omitting Huang 2023    0.0%
## Omitting Wu 2022       0.0%
## Omitting Ding 2023     0.0%
## Omitting Zhai 2023     0.0%
## Omitting Zhai 2023     0.0%
## Omitting Qian 2022     0.0%
## Omitting Zhang 2022    0.0%
## Omitting Deng 2022    0.0%
## Omitting AlSmadi 2019  0.0%
##
## Pooled estimate      0.0%
##
## Details on meta-analytical method:
## - Mantel-Haenszel method
## - Restricted maximum-likelihood estimator for tau^2
```

## 5 Overall Summary Forest plots

```
overall <- cbind(  
  "Outcome" = c(  
    "Immediate SFR",  
    "Final SFR",  
    "Auxiliary Treatment",  
    "Overall Complications",  
    "Fever",  
    "Infection",  
    "Sepsis",  
    "Abscess",  
    "Haematoma",  
    "Pain",  
    "Stricture",  
    "Embolisation",  
    "Transfusion",  
    "CD I",  
    "CD II",  
    "CD III",  
    "CD IV",  
    "CD I-II",  
    "CD III-V",  
    "Operative time",  
    "VAS",  
    "Length of Stay"  
  ),  
  "type" = c(  
    "binary",  
    "cont",  
    "cont",  
    "cont"  
  ),  
  "n_studies" = c(  
    immediate_sfr_metabin$k,
```



```

    sfr_metabin$k,
    aux_rx_metabin$k,
    comp_metabin$k,
    fever_metabin$k,
    infection_metabin$k,
    sepsis_metabin$k,
    abscess_metabin$k,
    haematoma_metabin$k,
    pain_metabin$k,
    stricture_metabin$k,
    ir_embolisation_metabin$k,
    transfusion_metabin$k,
    clav_i_metabin$k,
    clav_ii_metabin$k,
    clav_iii_metabin$k,
    clav_iv_metabin$k,
    clav_i_ii_metabin$k,
    clav_iii_v_metabin$k,
    or_time_metacont$k,
    vas_metacont$k,
    los_metacont$k),
"es" = c(
    immediate_sfr_metabin$TE.random %>% exp(),
    sfr_metabin$TE.random %>% exp(),
    aux_rx_metabin$TE.random %>% exp(),
    comp_metabin$TE.random %>% exp(),
    fever_metabin$TE.random %>% exp(),
    infection_metabin$TE.random %>% exp(),
    sepsis_metabin$TE.random %>% exp(),
    abscess_metabin$TE.random %>% exp(),
    haematoma_metabin$TE.random %>% exp(),
    pain_metabin$TE.random %>% exp(),
    stricture_metabin$TE.random %>% exp(),
    ir_embolisation_metabin$TE.random %>% exp(),
    transfusion_metabin$TE.random %>% exp(),
    clav_i_metabin$TE.random %>% exp(),
    clav_ii_metabin$TE.random %>% exp(),
    clav_iii_metabin$TE.random %>% exp(),
    clav_iv_metabin$TE.random %>% exp(),
    clav_i_ii_metabin$TE.random %>% exp(),
    clav_iii_v_metabin$TE.random %>% exp(),
    or_time_metacont$TE.random,
    vas_metacont$TE.random,
    los_metacont$TE.random),
"lower_ci" = c(
    immediate_sfr_metabin$lower.random %>% exp(),
    sfr_metabin$lower.random %>% exp(),
    aux_rx_metabin$lower.random %>% exp(),
    comp_metabin$lower.random %>% exp(),
    fever_metabin$lower.random %>% exp(),
    infection_metabin$lower.random %>% exp(),
    sepsis_metabin$lower.random %>% exp(),
    abscess_metabin$lower.random %>% exp(),

```

```

haematoma_metabin$lower.random %>% exp(),
pain_metabin$lower.random %>% exp(),
stricture_metabin$lower.random %>% exp(),
ir_embolisation_metabin$lower.random %>% exp(),
transfusion_metabin$lower.random %>% exp(),
clav_i_metabin$lower.random %>% exp(),
clav_ii_metabin$lower.random %>% exp(),
clav_iii_metabin$lower.random %>% exp(),
clav_iv_metabin$lower.random %>% exp(),
clav_i_ii_metabin$lower.random %>% exp(),
clav_iii_v_metabin$lower.random %>% exp(),
or_time_metacont$lower.random,
vas_metacont$lower.random,
los_metacont$lower.random),
"upper_ci" = c(immediate_sfr_metabin$upper.random %>% exp(),
               sfr_metabin$upper.random %>% exp(),
               aux_rx_metabin$upper.random %>% exp(),
               comp_metabin$upper.random %>% exp(),
               fever_metabin$upper.random %>% exp(),
               infection_metabin$upper.random %>% exp(),
               sepsis_metabin$upper.random %>% exp(),
               abscess_metabin$upper.random %>% exp(),
               haematoma_metabin$upper.random %>% exp(),
               pain_metabin$upper.random %>% exp(),
               stricture_metabin$upper.random %>% exp(),
               ir_embolisation_metabin$upper.random %>% exp(),
               transfusion_metabin$upper.random %>% exp(),
               clav_i_metabin$upper.random %>% exp(),
               clav_ii_metabin$upper.random %>% exp(),
               clav_iii_metabin$upper.random %>% exp(),
               clav_iv_metabin$upper.random %>% exp(),
               clav_i_ii_metabin$upper.random %>% exp(),
               clav_iii_v_metabin$upper.random %>% exp(),
               or_time_metacont$upper.random,
               vas_metacont$upper.random,
               los_metacont$upper.random),
"p" = c(
  immediate_sfr_metabin$pval.random,
  sfr_metabin$pval.random,
  aux_rx_metabin$pval.random,
  comp_metabin$pval.random,
  fever_metabin$pval.random,
  infection_metabin$pval.random,
  sepsis_metabin$pval.random,
  abscess_metabin$pval.random,
  haematoma_metabin$pval.random,
  pain_metabin$pval.random,
  stricture_metabin$pval.random,
  ir_embolisation_metabin$pval.random,
  transfusion_metabin$pval.random,
  clav_i_metabin$pval.random,
  clav_ii_metabin$pval.random,
  clav_iii_metabin$pval.random,

```

```

clav_iv_metabin$pval.random,
clav_i_ii_metabin$pval.random,
clav_iii_v_metabin$pval.random,
or_time_metacont$pval.random,
vas_metacont$pval.random,
los_metacont$pval.random)) %>% as_tibble() %>% drop_na(es)

overall$es <- as.numeric(overall$es)
overall$es <- round(overall$es, digits = 2)

overall$lower_ci <- as.numeric(overall$lower_ci)
overall$lower_ci <- round(overall$lower_ci, digits = 2)

overall$upper_ci <- as.numeric(overall$upper_ci)
overall$upper_ci <- round(overall$upper_ci, digits = 2)

overall$p <- as.numeric(overall$p)
overall$p <- round(overall$p, digits = 2)
overall$p <- ifelse(overall$p<0.001, "<0.001", overall$p)

```

## 5.1 Summary Table of number of studies for each outcome included in meta-analysis

```
overall %>% subset(select = c(Outcome, n_studies)) %>% gt() %>% tab_header(title = "Summary table of Nu
```

Summary table of Number of Studies for Each Outcome Meta-Analysis

| Outcome               | Studies, n |
|-----------------------|------------|
| Immediate SFR         | 9          |
| Final SFR             | 17         |
| Auxiliary Treatment   | 8          |
| Overall Complications | 17         |
| Fever                 | 13         |
| Infection             | 14         |
| Sepsis                | 2          |
| Haematoma             | 1          |
| Pain                  | 3          |
| Stricture             | 2          |
| Embolisation          | 2          |
| Transfusion           | 3          |
| CD I                  | 8          |
| CD II                 | 6          |
| CD III                | 3          |
| CD IV                 | 1          |
| CD I-II               | 8          |
| CD III-V              | 3          |
| Operative time        | 17         |
| VAS                   | 2          |
| Length of Stay        | 9          |

## 5.2 Summary Forest plot of Continuous outcomes

### 5.2.1 Continuous Outcomes Table

md = mean difference lb = lower bound of 95% confidence interval ub = upper bound of 95% confidence interval tf = trim and fill

```
overall_continuous <-  
  overall %>% subset(type == "cont") %>% subset(select = c(Outcome,  
                                                         n_studies,  
                                                         es,  
                                                         lower_ci,  
                                                         upper_ci,  
                                                         p)) %>% as_tibble()  
overall_continuous %>% gt() %>% tab_header(title = "Summary Table for Continuous Outcomes") %>% cols_me
```

Summary Table for Continuous Outcomes

| Outcome        | Studies, n | MD (95% CI)        | p    |
|----------------|------------|--------------------|------|
| Operative time | 17         | -2.32 (-7.07-2.44) | 0.34 |
| VAS            | 2          | -1.20 (-2.93-0.52) | 0.17 |
| Length of Stay | 9          | -1.09 (-1.90-0.28) | 0.01 |

## 5.2.2 Continuous Forest plot

```

continuous_plot <- overall_continuous %>%
  forestplot(
    mean = es,
    lower = lower_ci,
    upper = upper_ci,
    labeltext = c(Outcome, n_studies, es, lower_ci, upper_ci, p),
    zero = 0,
    vertices = TRUE,
    title = "A. Forest plot of MA Outcomes for Continuous Outcomes",
    clip = c(-4, 2),
    xlab = "MD [95% CI]",
    graph.pos = 3
  ) %>% fp_set_style(
    box = c("black"),
    line = "black",
    txt_gp = fpTxtGp(
      ticks = gpar(fontfamily = "", cex = 1),
      xlab = gpar(fontfamily = "", cex = 1)
    )
  ) %>% fp_add_lines("steelblue") %>%
  fp_add_header("Outcome",
    "Studies, n",
    "MD",
    "[ 95%", " CI ]",
    "P-Value") %>% fp_decorate_graph(box = TRUE) %>% fp_set_zebra_style("#EFEFEF")
continuous_plot

```

A. Forest plot of MA Outcomes for Continuous Outcomes

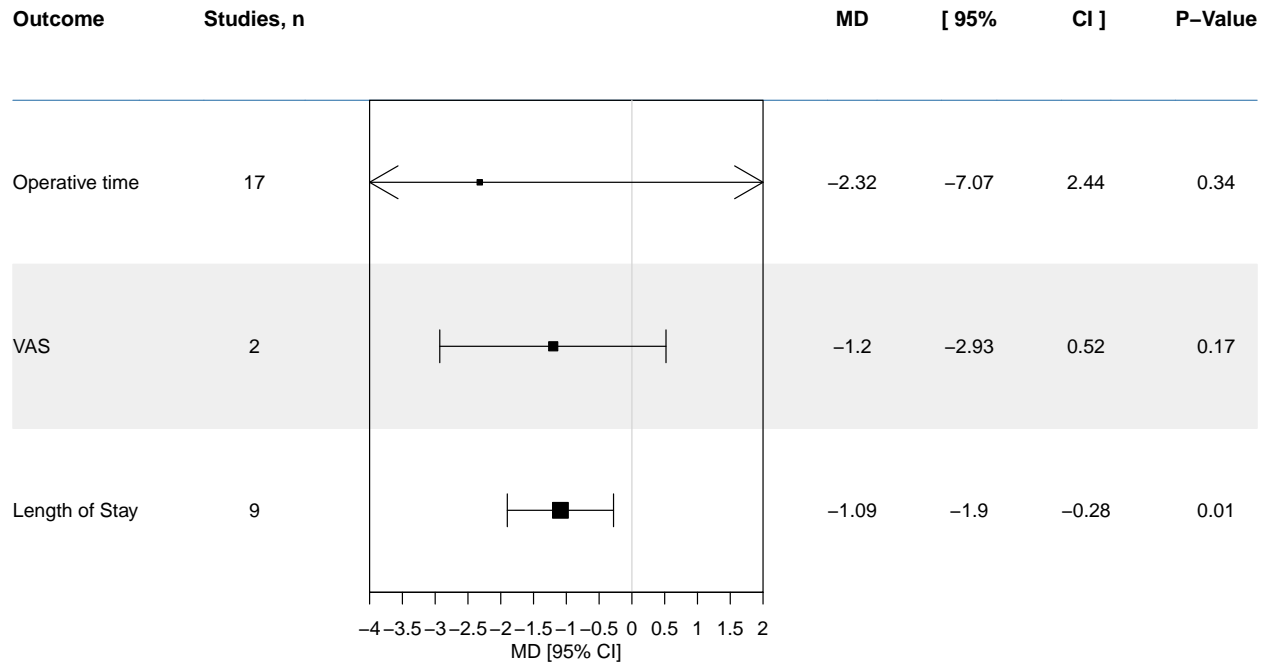

### 5.3 Summary Forest plot of Binary outcomes

### 5.3.1 Binary Outcomes Table

md = mean difference lb = lower bound of 95% confidence interval ub = upper bound of 95% confidence interval tf = trim and fill

```
overall_binary <-  
  overall %>% subset(type == "binary") %>% subset(select = c(Outcome,  
                                                            n_studies,  
                                                            es,  
                                                            lower_ci,  
                                                            upper_ci,  
                                                            p)) %>% as_tibble()  
overall_binary %>% gt() %>% tab_header(title = "Summary Table for Binary Outcomes") %>% cols_merge(colum
```

Summary Table for Binary Outcomes

| Outcome               | Studies, n | RR (95% CI)       | p      |
|-----------------------|------------|-------------------|--------|
| Immediate SFR         | 9          | 1.15 (0.99-1.34)  | 0.08   |
| Final SFR             | 17         | 1.12 (1.05-1.19)  | <0.001 |
| Auxiliary Treatment   | 8          | 0.81 (0.31-2.10)  | 0.67   |
| Overall Complications | 17         | 0.44 (0.33-0.57)  | <0.001 |
| Fever                 | 13         | 0.44 (0.30-0.64)  | <0.001 |
| Infection             | 14         | 0.43 (0.29-0.63)  | <0.001 |
| Sepsis                | 2          | 0.24 (0.07-0.75)  | 0.01   |
| Haematoma             | 1          | 0.41 (0.02-9.84)  | 0.58   |
| Pain                  | 3          | 0.22 (0.08-0.59)  | <0.001 |
| Stricture             | 2          | 0.60 (0.03-12.28) | 0.74   |
| Embolisation          | 2          | 0.29 (0.03-2.55)  | 0.26   |
| Transfusion           | 3          | 0.16 (0.03-0.88)  | 0.04   |
| CD I                  | 8          | 0.60 (0.40-0.90)  | 0.01   |
| CD II                 | 6          | 0.37 (0.16-0.88)  | 0.02   |
| CD III                | 3          | 0.77 (0.16-3.67)  | 0.74   |
| CD IV                 | 1          | 0.33 (0.04-3.17)  | 0.34   |
| CD I-II               | 8          | 0.53 (0.37-0.76)  | <0.001 |
| CD III-V              | 3          | 0.57 (0.16-2.02)  | 0.39   |



### 5.3.2 Binary Forest plot - Meta-Analysis

Reference = No Suction

```
binary_plot <- overall_binary %>%
  forestplot(
    mean = es,
    lower = lower_ci,
    upper = upper_ci,
    zero = 1,
    labeltext = c(Outcome, n_studies, es, lower_ci, upper_ci, p),
    vertices = TRUE,
    title = "A. Forest plot of MA Outcomes for Binary Outcomes",
    clip = c(-1.5, 1.5),
    xlab = "RR [95% CI]",
    graph.pos = 3
  ) %>% fp_set_style(
    box = c("black"),
    line = "black",
    txt_gp = fpTxtGp(
      ticks = gpar(fontfamily = "", cex = 1),
      xlab = gpar(fontfamily = "", cex = 1)
    )
  ) %>% fp_add_lines("steelblue") %>%
  fp_add_header("Outcome",
    "Studies, n",
    "RR",
    "[ 95%", " CI ]",
    "P-Value") %>% fp_decorate_graph(box = TRUE) %>% fp_set_zebra_style("#EFEFEF")
binary_plot
```

A. Forest plot of MA Outcomes for Binary Outcomes

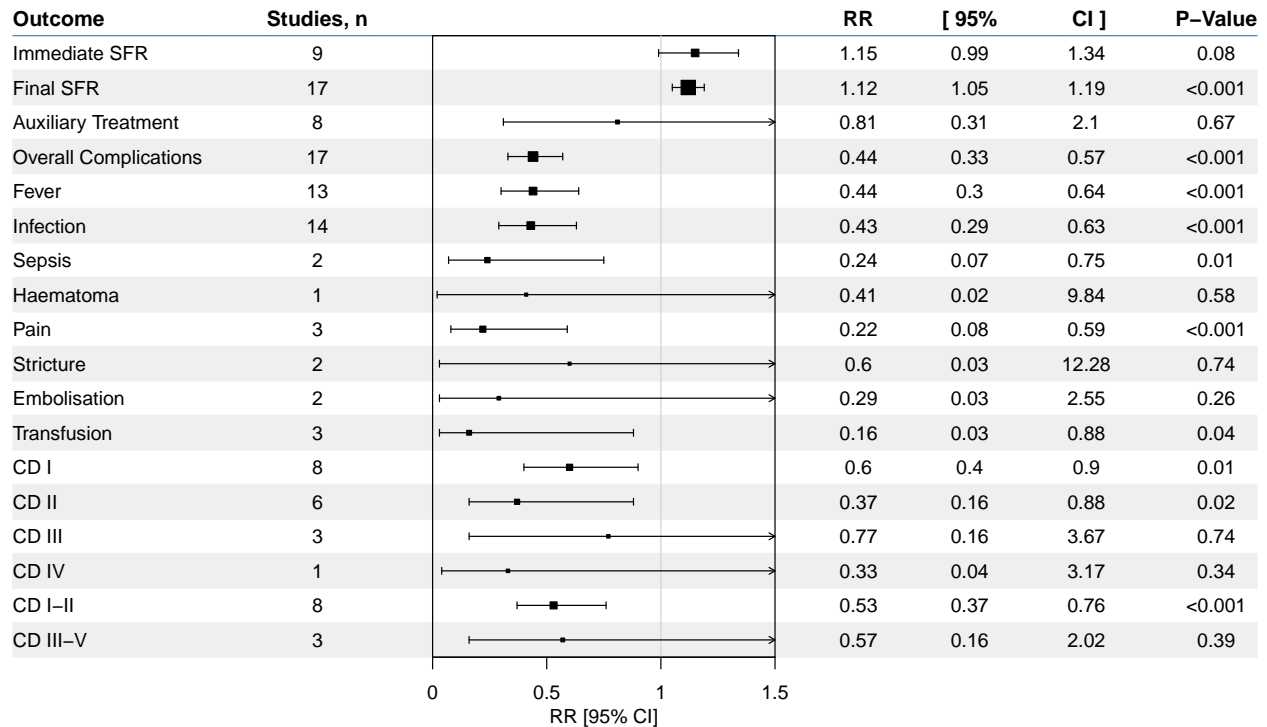

## 6 RCT only Meta-Analysis Outcomes

```
rct_only <- suction_data %>% subset(design == "RCT")
```

## 6.1 Immediate SFR

### 6.1.1 Meta-analysis

```
immediate_sfr_metabin <- metabin(data = suction_data,
                                event.c = sfr_immediate_n_control,
                                n.c = sample_size_control,
                                event.e = sfr_immediate_n_suction,
                                n.e = sample_size_suction,
                                studlab = author_year)

immediate_sfr_metabin

## Number of studies: k = 9
## Number of observations: o = 2311
## Number of events: e = 979
##
##              RR          95%-CI    z  p-value
## Common effect model  1.1581 [1.0834; 1.2380] 4.31 < 0.0001
## Random effects model  1.1478 [0.9854; 1.3370] 1.77  0.0765
##
## Quantifying heterogeneity:
## tau^2 = 0.0365 [0.0088; 0.2318]; tau = 0.1910 [0.0939; 0.4814]
## I^2 = 74.6% [50.9%; 86.9%]; H = 1.99 [1.43; 2.76]
##
## Test of heterogeneity:
##      Q d.f. p-value
## 31.55  8 0.0001
##
## Details on meta-analytical method:
## - Mantel-Haenszel method
## - Inverse variance method
## - Restricted maximum-likelihood estimator for tau^2
## - Q-Profile method for confidence interval of tau^2 and tau
```

### 6.1.2 Forest plot

```
forest(immediate_sfr_metabin,
       sortvar = TE)
```

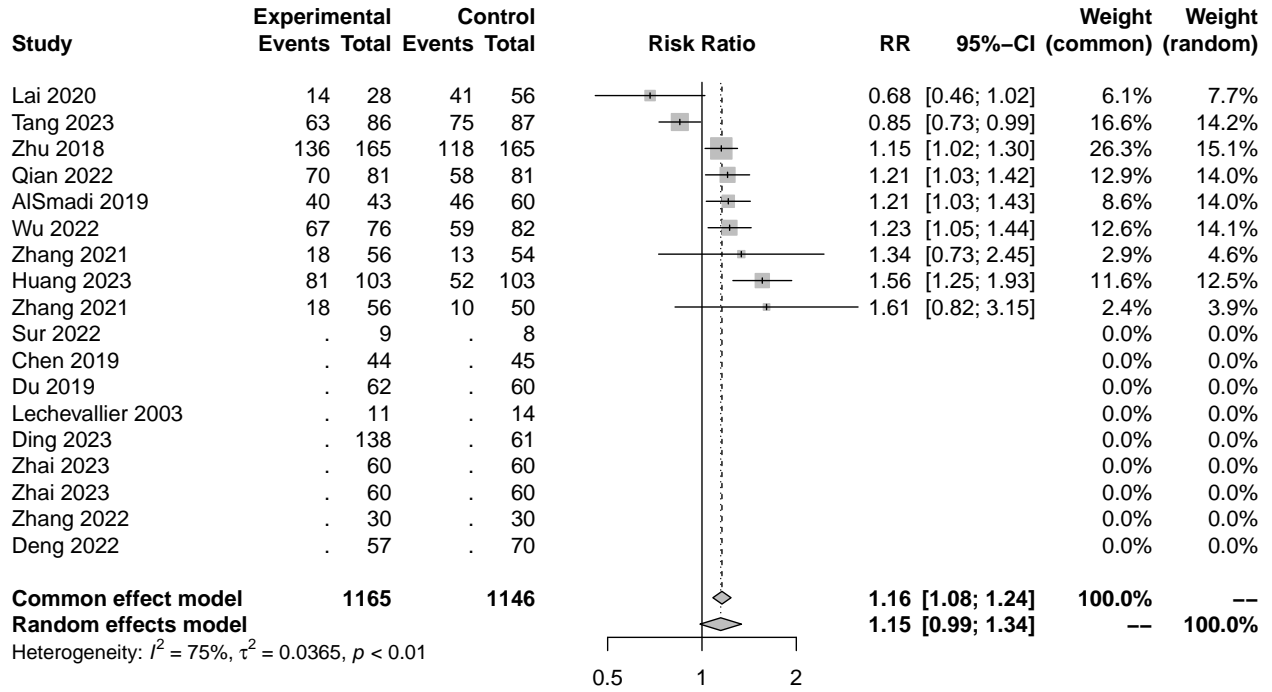

### 6.1.3 Trim and Fill

```
trimfill(immediate_sfr_metabin)
```

```
## Warning in trimfill.meta(immediate_sfr_metabin): 9 observation(s) dropped due
## to missing values

## Number of studies: k = 11 (with 2 added studies)
## Number of observations: o = 1744
## Number of events: e = 1140
##
##                RR          95%-CI    z p-value
## Random effects model 1.0855 [0.9289; 1.2685] 1.03 0.3019
##
## Quantifying heterogeneity:
## tau^2 = 0.0471 [0.0138; 0.2196]; tau = 0.2170 [0.1173; 0.4686]
## I^2 = 76.9% [58.8%; 87.1%]; H = 2.08 [1.56; 2.78]
##
## Test of heterogeneity:
##      Q d.f.  p-value
## 43.33  10 < 0.0001
##
## Details on meta-analytical method:
## - Inverse variance method
## - Restricted maximum-likelihood estimator for tau^2
## - Q-Profile method for confidence interval of tau^2 and tau
## - Trim-and-fill method to adjust for funnel plot asymmetry (L-estimator)
```

```
forest(trimfill(immediate_sfr_metabin),
        sortvar = TE)
```

```
## Warning in trimfill.meta(immediate_sfr_metabin): 9 observation(s) dropped due
## to missing values
```



Heterogeneity:  $I^2 = 77\%$ ,  $\tau^2 = 0.0471$ ,  $p < 0.01$

### 6.1.4 Funnel plot

```
funnel(trimfill(immediate_sfr_metabin))
```

```
## Warning in trimfill.meta(immediate_sfr_metabin): 9 observation(s) dropped due  
## to missing values
```



### 6.1.5 Baujat

```
baujat(immediate_sfr_metabin, pos = 1)
```

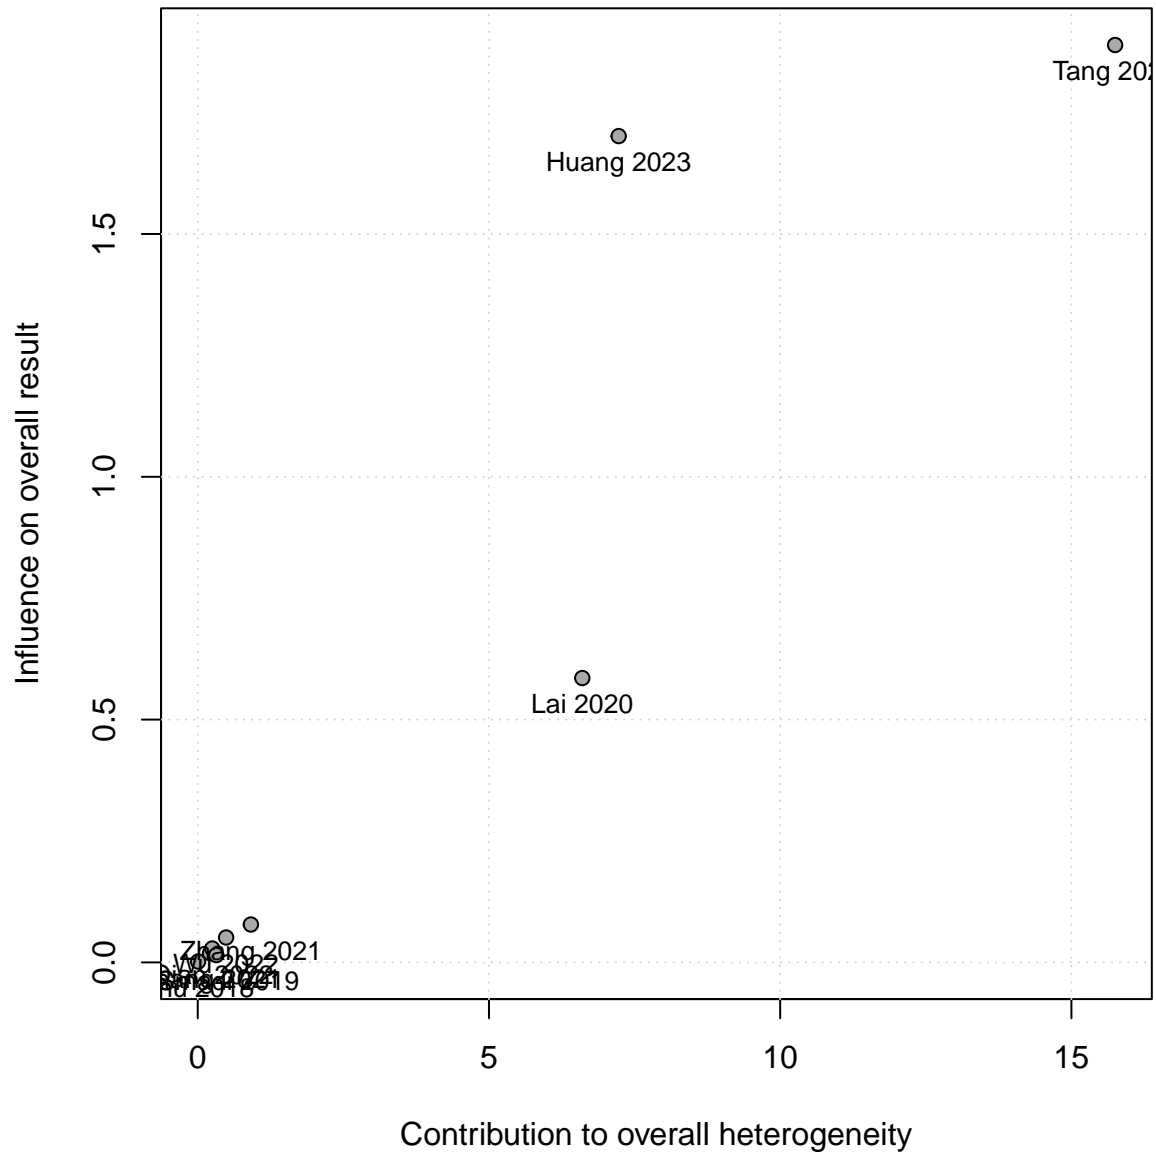

### 6.1.6 Leave one out

```
metainf(immediate_sfr_metabin)
```

```
## Influential analysis (common effect model)
##
##
##          RR          95%-CI  p-value  tau^2    tau
## Omitting Sur 2022      1.1581 [1.0834; 1.2380] < 0.0001  0.0365  0.1910
## Omitting Tang 2023     1.2195 [1.1329; 1.3128] < 0.0001  0.0076  0.0873
## Omitting Chen 2019     1.1581 [1.0834; 1.2380] < 0.0001  0.0365  0.1910
## Omitting Du 2019      1.1581 [1.0834; 1.2380] < 0.0001  0.0365  0.1910
## Omitting Lai 2020     1.1889 [1.1116; 1.2716] < 0.0001  0.0258  0.1607
## Omitting Zhu 2018     1.1601 [1.0710; 1.2565]  0.0003  0.0482  0.2196
## Omitting Zhang 2021   1.1473 [1.0741; 1.2254] < 0.0001  0.0376  0.1938
## Omitting Zhang 2021   1.1527 [1.0791; 1.2313] < 0.0001  0.0396  0.1990
## Omitting Lechevallier 2003 1.1581 [1.0834; 1.2380] < 0.0001  0.0365  0.1910
## Omitting Huang 2023   1.1057 [1.0315; 1.1853]  0.0046  0.0246  0.1568
## Omitting Wu 2022     1.1484 [1.0676; 1.2353]  0.0002  0.0464  0.2153
## Omitting Ding 2023    1.1581 [1.0834; 1.2380] < 0.0001  0.0365  0.1910
## Omitting Zhai 2023    1.1581 [1.0834; 1.2380] < 0.0001  0.0365  0.1910
## Omitting Zhai 2023    1.1581 [1.0834; 1.2380] < 0.0001  0.0365  0.1910
## Omitting Qian 2022    1.1508 [1.0700; 1.2377]  0.0002  0.0468  0.2164
## Omitting Zhang 2022   1.1581 [1.0834; 1.2380] < 0.0001  0.0365  0.1910
## Omitting Deng 2022    1.1581 [1.0834; 1.2380] < 0.0001  0.0365  0.1910
## Omitting AlSmadi 2019  1.1529 [1.0734; 1.2383] < 0.0001  0.0467  0.2160
##
## Pooled estimate      1.1581 [1.0834; 1.2380] < 0.0001  0.0365  0.1910
##
##          I^2
## Omitting Sur 2022     74.6%
## Omitting Tang 2023    51.5%
## Omitting Chen 2019    74.6%
## Omitting Du 2019     74.6%
## Omitting Lai 2020    72.2%
## Omitting Zhu 2018    77.8%
## Omitting Zhang 2021  77.1%
## Omitting Zhang 2021  77.6%
## Omitting Lechevallier 2003 74.6%
## Omitting Huang 2023  69.4%
## Omitting Wu 2022     77.2%
## Omitting Ding 2023   74.6%
## Omitting Zhai 2023   74.6%
## Omitting Zhai 2023   74.6%
## Omitting Qian 2022   77.4%
## Omitting Zhang 2022  74.6%
## Omitting Deng 2022   74.6%
## Omitting AlSmadi 2019 77.4%
##
## Pooled estimate      74.6%
##
## Details on meta-analytical method:
## - Mantel-Haenszel method
## - Restricted maximum-likelihood estimator for tau^2
```



## 6.2 Final SFR

### 6.2.1 Meta-analysis

```
sfr_metabin <- metabin(data = rct_only,
                      event.c = sfr_final_n_control,
                      n.c = sample_size_control,
                      event.e = sfr_final_n_suction,
                      n.e = sample_size_suction,
                      studlab = author_year)

sfr_metabin

## Number of studies: k = 4
## Number of observations: o = 397
## Number of events: e = 340
##
##              RR          95%-CI    z p-value
## Common effect model 1.1002 [1.0307; 1.1744] 2.87 0.0041
## Random effects model 1.1259 [0.9804; 1.2930] 1.68 0.0929
##
## Quantifying heterogeneity:
## tau^2 = 0.0118 [0.0006; 0.1885]; tau = 0.1087 [0.0239; 0.4342]
## I^2 = 73.8% [26.7%; 90.6%]; H = 1.95 [1.17; 3.27]
##
## Test of heterogeneity:
##      Q d.f. p-value
## 11.45  3 0.0095
##
## Details on meta-analytical method:
## - Mantel-Haenszel method
## - Inverse variance method
## - Restricted maximum-likelihood estimator for tau^2
## - Q-Profile method for confidence interval of tau^2 and tau
## - Continuity correction of 0.5 in studies with zero cell frequencies
```

## 6.2.2 Forest plot

```
forest(sfr_metabin,
       sortvar = TE)
```

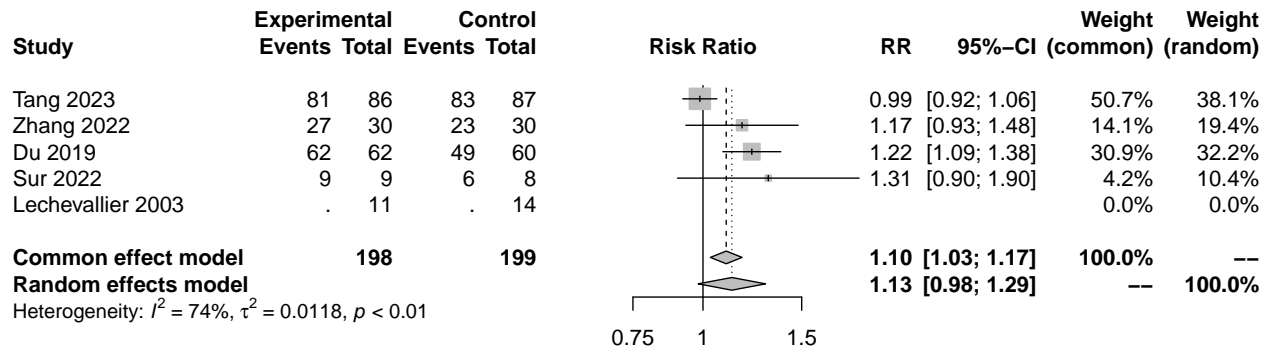

### 6.2.3 Trim and Fill

```
trimfill(sfr_metabin)
```

```
## Warning in trimfill.meta(sfr_metabin): 1 observation(s) dropped due to missing
## values

## Number of studies: k = 6 (with 2 added studies)
## Number of observations: o = 511
## Number of events: e = 466
##
##                      RR          95%-CI    z p-value
## Random effects model 1.0237 [0.8722; 1.2015] 0.29 0.7745
##
## Quantifying heterogeneity:
## tau^2 = 0.0286 [0.0059; 0.2698]; tau = 0.1692 [0.0771; 0.5194]
## I^2 = 81.8% [61.2%; 91.5%]; H = 2.34 [1.61; 3.42]
##
## Test of heterogeneity:
##      Q d.f.  p-value
## 27.46   5 < 0.0001
##
## Details on meta-analytical method:
## - Inverse variance method
## - Restricted maximum-likelihood estimator for tau^2
## - Q-Profile method for confidence interval of tau^2 and tau
## - Trim-and-fill method to adjust for funnel plot asymmetry (L-estimator)
```

```
forest(trimfill(sfr_metabin),
        sortvar = TE)
```

```
## Warning in trimfill.meta(sfr_metabin): 1 observation(s) dropped due to missing
## values
```

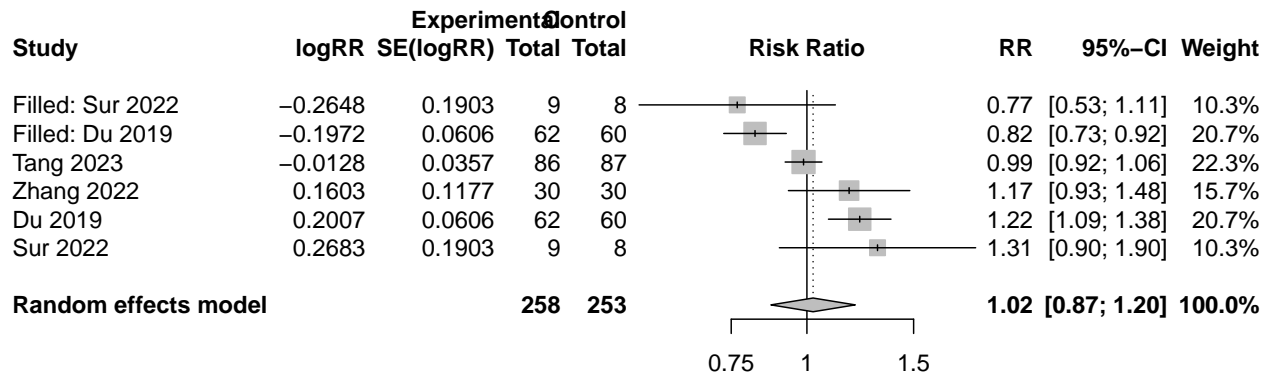

## 6.2.4 Funnel plot

```
funnel(trimfill(sfr_metabin))
```

```
## Warning in trimfill.meta(sfr_metabin): 1 observation(s) dropped due to missing  
## values
```

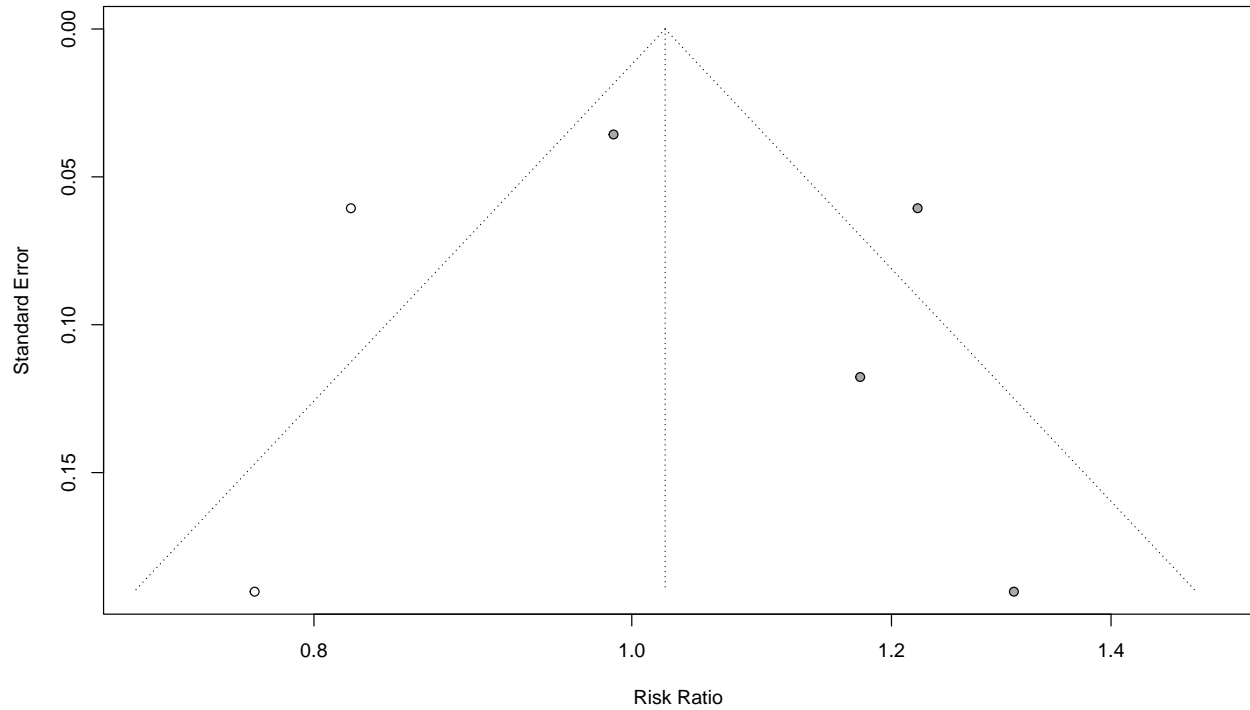

### 6.2.5 Baujat

```
baujat(sfr_metabin, pos = 1)
```

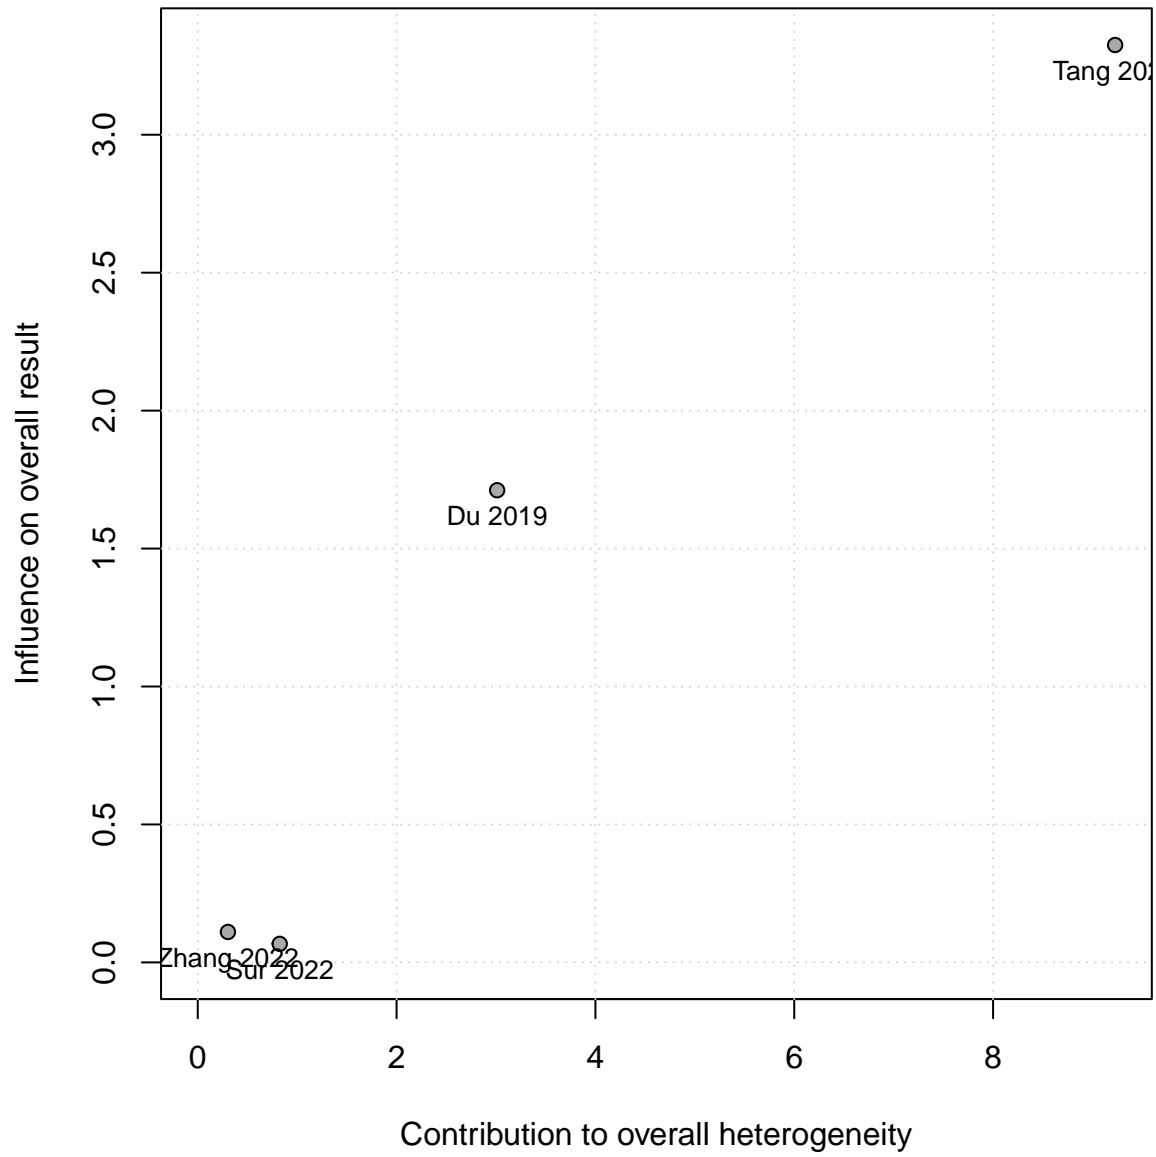

## 6.2.6 Leave one out

```
metainf(sfr_metabin)
```

```
## Influential analysis (common effect model)
##
##           RR           95%-CI p-value   tau^2   tau
## Omitting Sur 2022      1.0908 [1.0219; 1.1643] 0.0090 0.0125 0.1120
## Omitting Tang 2023      1.2165 [1.0920; 1.3553] 0.0004 0.0000 0.0000
## Omitting Du 2019        1.0454 [0.9685; 1.1285] 0.2549 0.0109 0.1046
## Omitting Lechevallier 2003 1.1002 [1.0307; 1.1744] 0.0041 0.0118 0.1087
## Omitting Zhang 2022      1.0881 [1.0191; 1.1617] 0.0115 0.0168 0.1296
##
## Pooled estimate          1.1002 [1.0307; 1.1744] 0.0041 0.0118 0.1087
##           I^2
## Omitting Sur 2022          80.3%
## Omitting Tang 2023          0.0%
## Omitting Du 2019           48.5%
## Omitting Lechevallier 2003 73.8%
## Omitting Zhang 2022        81.1%
##
## Pooled estimate           73.8%
##
## Details on meta-analytical method:
## - Mantel-Haenszel method
## - Restricted maximum-likelihood estimator for tau^2
```

## 6.3 OR time

### 6.3.1 Meta-analysis

```
or_time_metacont <- metacont(data = rct_only,
                             mean.c = or_time_min_mean_control,
                             sd.c = or_time_min_sd_control,
                             mean.e = or_time_min_mean_suction,
                             sd.e = or_time_min_sd_suction,
                             n.e = sample_size_suction,
                             n.c = sample_size_control,
                             studlab = author_year)

or_time_metacont

## Number of studies: k = 5
## Number of observations: o = 397
##
##              MD              95%-CI      z p-value
## Common effect model -4.6093 [-5.9159; -3.3026] -6.91 < 0.0001
## Random effects model -6.8746 [-18.7055; 4.9562] -1.14 0.2548
##
## Quantifying heterogeneity:
## tau^2 = 158.1445 [43.6831; >1581.4445]; tau = 12.5755 [6.6093; >39.7674]
## I^2 = 98.0% [96.9%; 98.7%]; H = 7.03 [5.64; 8.78]
##
## Test of heterogeneity:
##      Q d.f. p-value
## 197.95 4 < 0.0001
##
## Details on meta-analytical method:
## - Inverse variance method
## - Restricted maximum-likelihood estimator for tau^2
## - Q-Profile method for confidence interval of tau^2 and tau
```

### 6.3.2 Forest plot

```
forest(or_time_metacont,
       sortvar = TE)
```

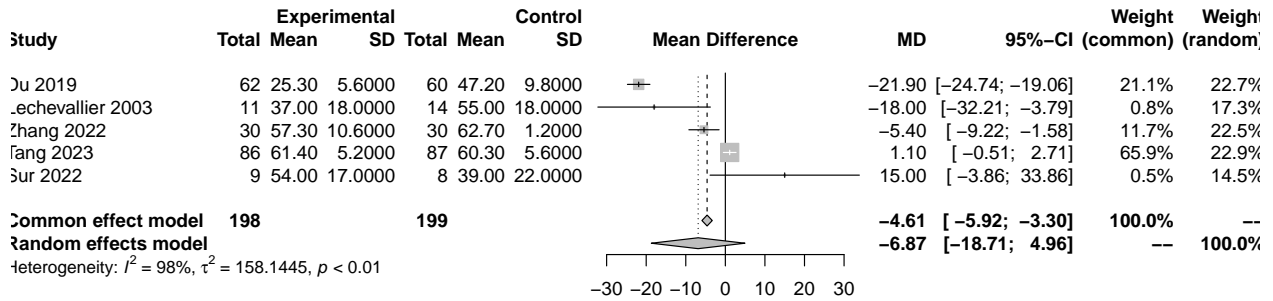



### 6.3.3 Trim and Fill

```
trimfill(or_time_metacont)
```

```
## Number of studies: k = 5 (with 0 added studies)
## Number of observations: o = 397
##
##                               MD                95%-CI        z p-value
## Random effects model -6.8746 [-18.7055; 4.9562] -1.14  0.2548
##
## Quantifying heterogeneity:
## tau^2 = 158.1445 [43.6831; >1581.4445]; tau = 12.5755 [6.6093; >39.7674]
## I^2 = 98.0% [96.9%; 98.7%]; H = 7.03 [5.64; 8.78]
##
## Test of heterogeneity:
##      Q d.f.  p-value
## 197.95   4 < 0.0001
##
## Details on meta-analytical method:
## - Inverse variance method
## - Restricted maximum-likelihood estimator for tau^2
## - Q-Profile method for confidence interval of tau^2 and tau
## - Trim-and-fill method to adjust for funnel plot asymmetry (L-estimator)
forest(trimfill(or_time_metacont),
        sortvar = TE)
```

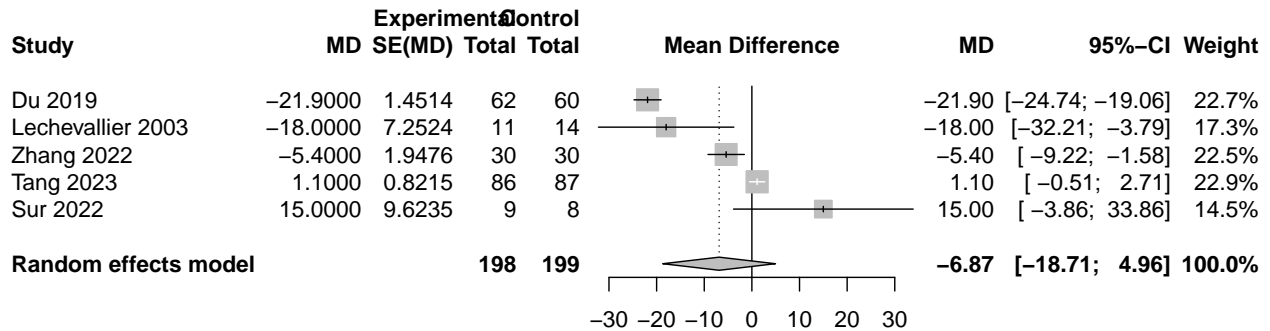

Heterogeneity:  $I^2 = 98\%$ ,  $\tau^2 = 158.1445$ ,  $p < 0.01$

### 6.3.4 Funnel plot

```
funnel(trimfill(or_time_metacont))
```

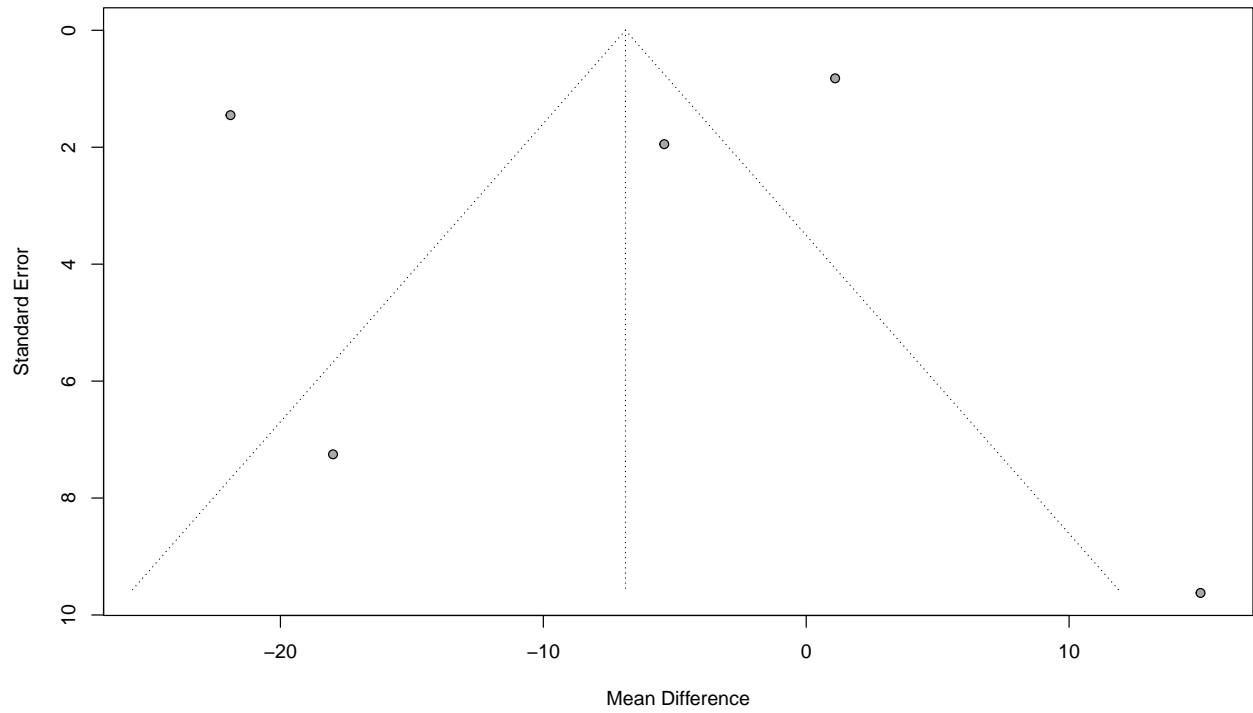

### 6.3.5 Baujat

```
baujat(or_time_metacont, pos = 1)
```

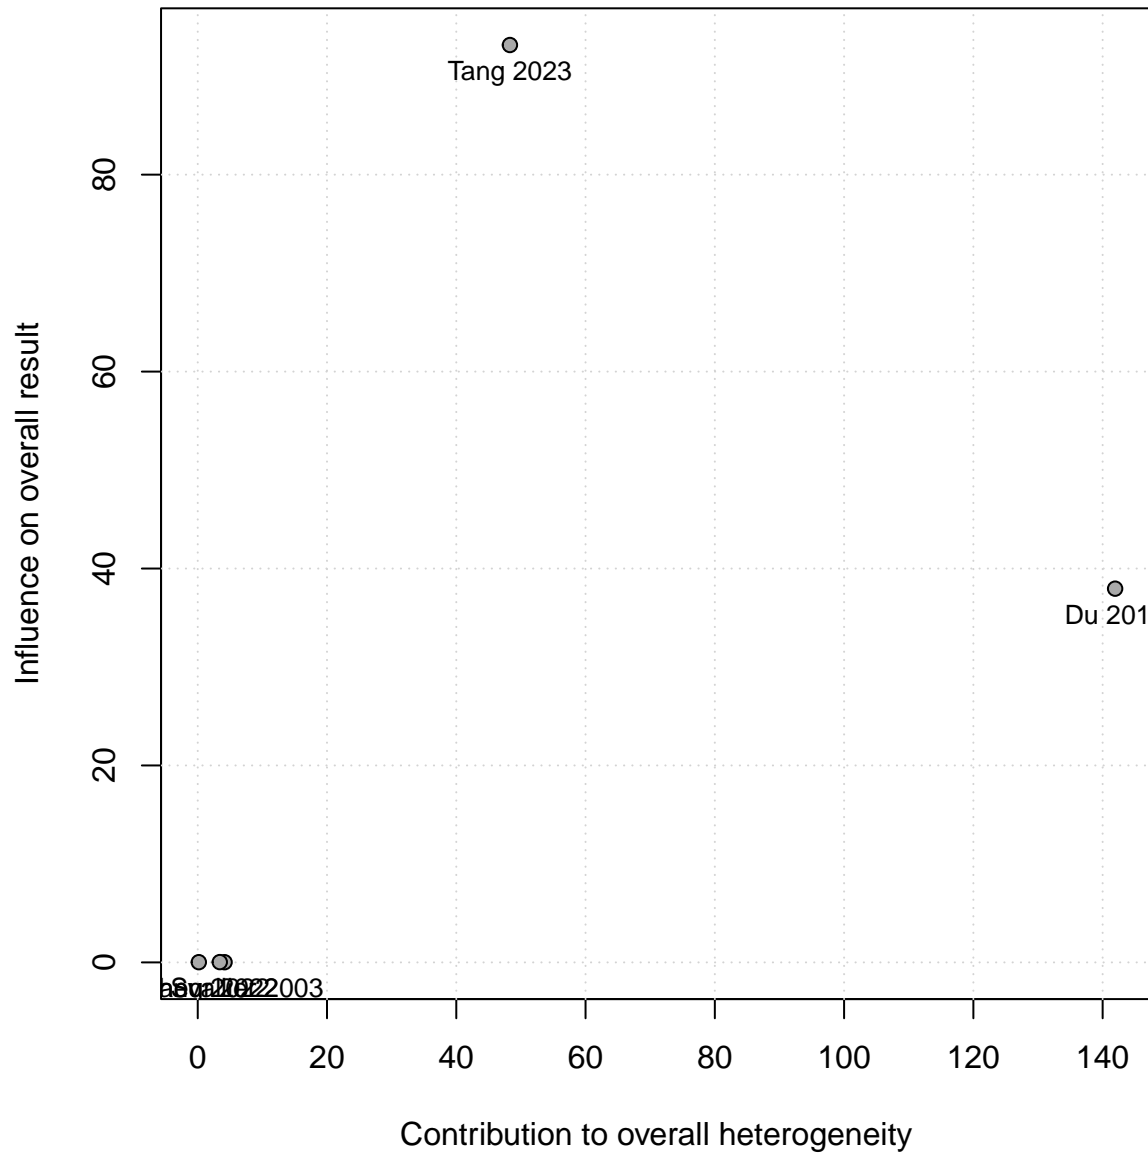

### 6.3.6 Leave one out

```
metainf(or_time_metacont)
```

```
## Influential analysis (common effect model)
##
##
##           MD           95%-CI p-value   tau^2
## Omitting Sur 2022      -4.7038 [-6.0136; -3.3940] < 0.0001 114.2692
## Omitting Tang 2023    -15.6222 [-17.8585; -13.3860] < 0.0001 190.4982
## Omitting Du 2019       0.0147 [-1.4563; 1.4858] 0.9844 77.7955
## Omitting Lechevallier 2003 -4.4951 [-5.8074; -3.1829] < 0.0001 184.0636
## Omitting Zhang 2022   -4.5043 [-5.8950; -3.1136] < 0.0001 233.2375
##
## Pooled estimate      -4.6093 [-5.9159; -3.3026] < 0.0001 158.1445
##
##           tau   I^2
## Omitting Sur 2022      10.6897 98.5%
## Omitting Tang 2023     13.8021 94.7%
## Omitting Du 2019       8.8202 83.4%
## Omitting Lechevallier 2003 13.5670 98.5%
## Omitting Zhang 2022    15.2721 98.5%
##
## Pooled estimate      12.5755 98.0%
##
## Details on meta-analytical method:
## - Inverse variance method
## - Restricted maximum-likelihood estimator for tau^2
```

## 6.4 Auxiliary Treatments

### 6.4.1 Meta-analysis

```
aux_rx_metabin <- metabin(data = rct_only,
                          event.c = auxillary_tx_n_control,
                          n.c = sample_size_control,
                          event.e = auxillary_tx_n_suction,
                          n.e = sample_size_suction,
                          studlab = author_year)

aux_rx_metabin

## Number of studies: k = 1
## Number of observations: o = 397
## Number of events: e = 7
##
##              RR          95%-CI      z p-value
## Common effect model 0.0646 [0.0038; 1.1059] -1.89 0.0587
## Random effects model 0.0645 [0.0038; 1.1054] -1.89 0.0586
##
## Quantifying heterogeneity:
## tau^2 = NA; tau = NA; I^2 = NA; H = NA
##
## Details on meta-analytical method:
## - Mantel-Haenszel method
## - Inverse variance method
## - Restricted maximum-likelihood estimator for tau^2
## - Continuity correction of 0.5 in studies with zero cell frequencies
```

### 6.4.2 Forest plot

```
forest(aux_rx_metabin,
       sortvar = TE)
```

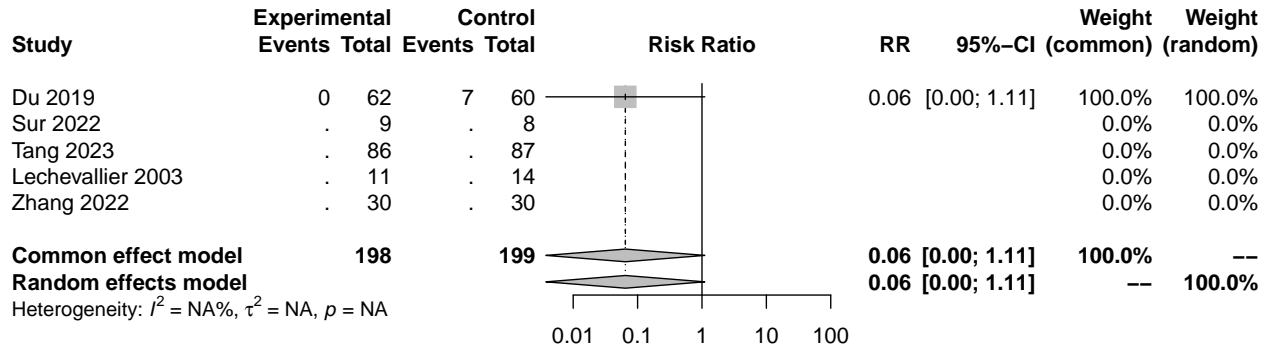

### 6.4.3 Trim and Fill

```
#trimfill(aux_rx_metabin)  
#forest(trimfill(aux_rx_metabin),  
#      sortvar = TE)
```

#### 6.4.4 Funnel plot

```
funnel((aux_rx_metabin))
```

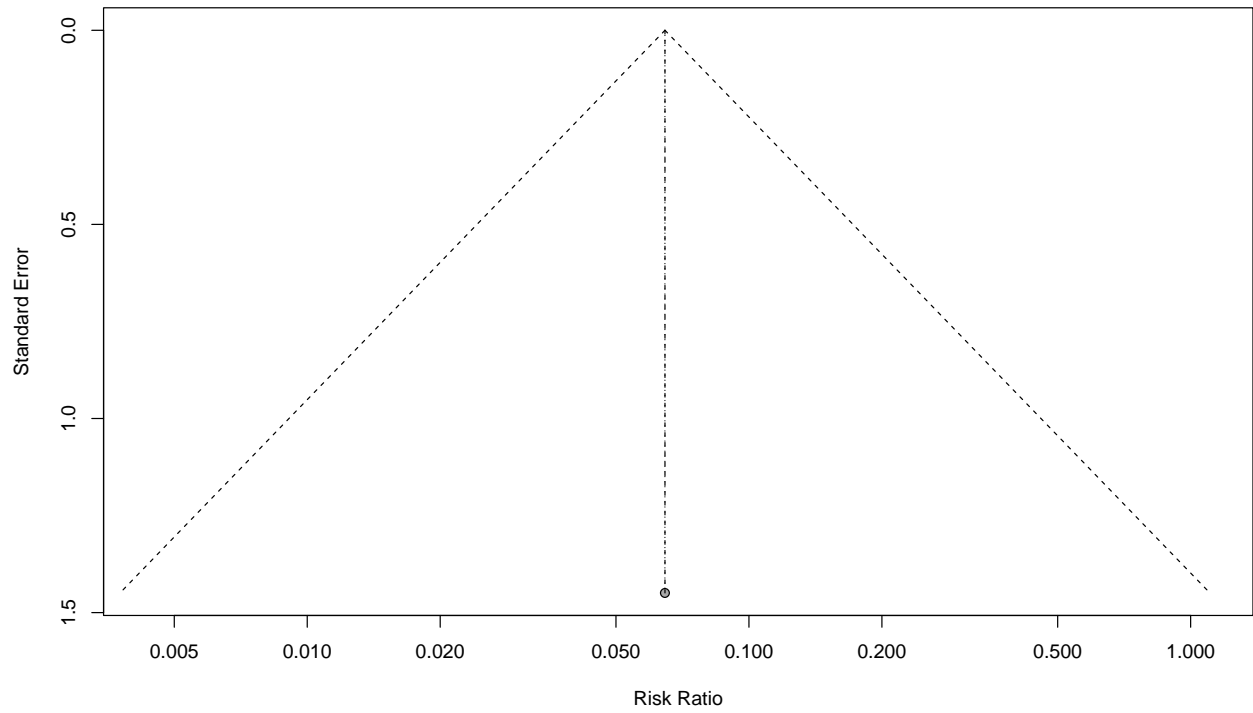



### 6.4.5 Baujat

```
baujat(aux_rx_metabin, pos = 1)
```

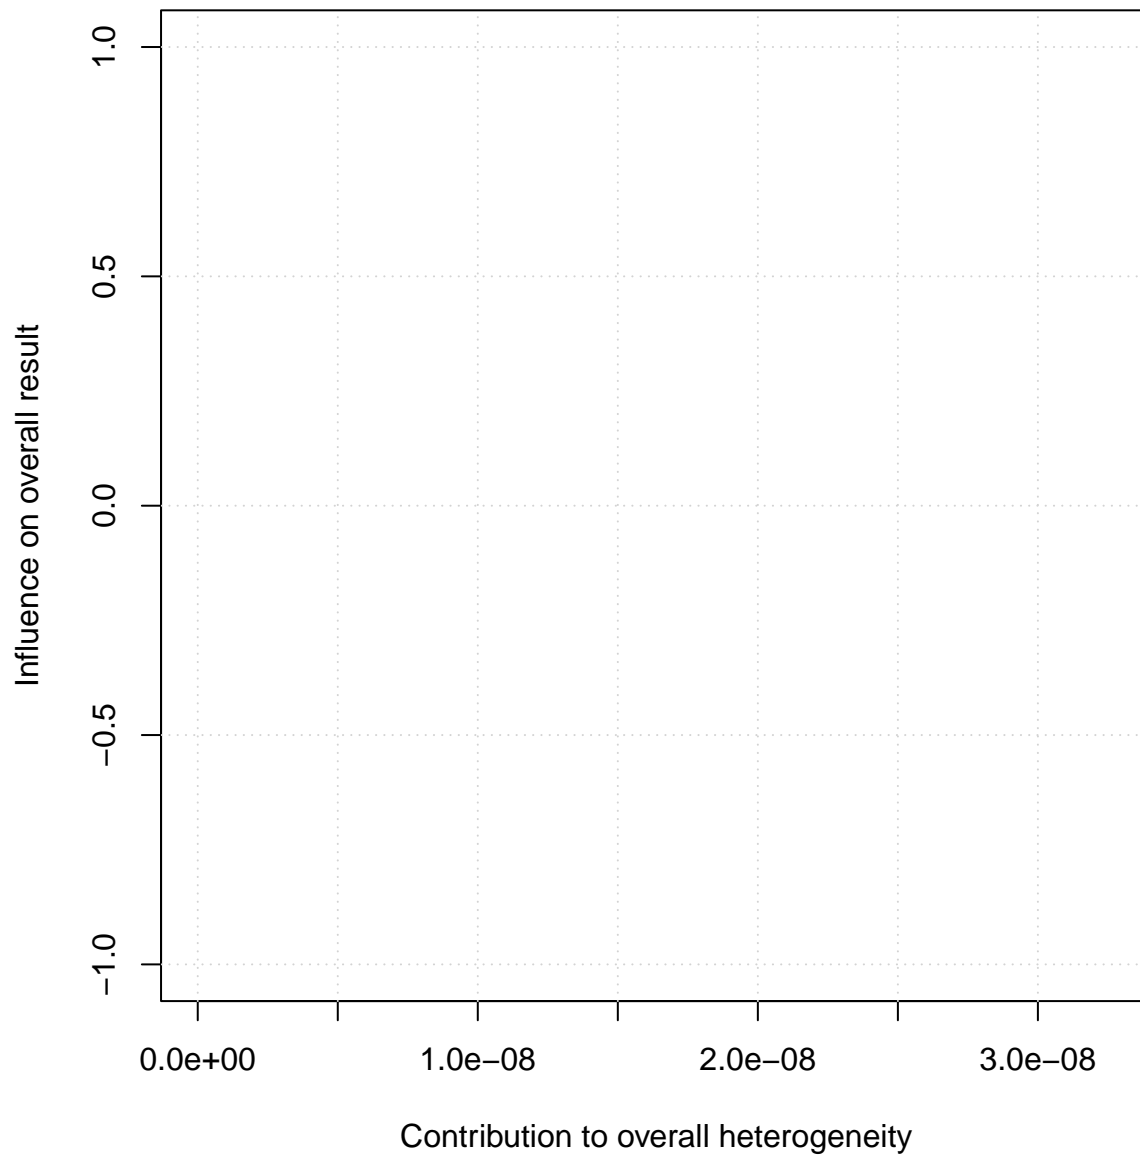

### 6.4.6 Leave one out

```
metainf(aux_rx_metabin)
```

```
## Influential analysis (common effect model)
##
##
##           RR           95%-CI p-value tau^2 tau I^2
## Omitting Sur 2022      0.0646 [0.0038; 1.1059] 0.0587
## Omitting Tang 2023      0.0646 [0.0038; 1.1059] 0.0587
## Omitting Du 2019
## Omitting Lechevallier 2003 0.0646 [0.0038; 1.1059] 0.0587
## Omitting Zhang 2022      0.0646 [0.0038; 1.1059] 0.0587
##
## Pooled estimate          0.0646 [0.0038; 1.1059] 0.0587
##
## Details on meta-analytical method:
## - Mantel-Haenszel method
## - Restricted maximum-likelihood estimator for tau^2
```

## 6.5 VAS

### 6.5.1 Meta-analysis

```
vas_metacont <- metacont(data = rct_only,
                        mean.c = vas_score_mean_control,
                        sd.c = vas_score_sd_control,
                        mean.e = vas_score_mean_suction,
                        sd.e = vas_score_sd_suction,
                        n.e = sample_size_suction,
                        n.c = sample_size_control,
                        studlab = author_year)

vas_metacont

## Number of studies: k = 1
## Number of observations: o = 397
##
##              MD              95%-CI      z p-value
## Common effect model -0.3400 [-0.6488; -0.0312] -2.16 0.0309
## Random effects model -0.3400 [-0.6488; -0.0312] -2.16 0.0309
##
## Quantifying heterogeneity:
## tau^2 = NA; tau = NA; I^2 = NA; H = NA
##
## Details on meta-analytical method:
## - Inverse variance method
## - Restricted maximum-likelihood estimator for tau^2
```

### 6.5.2 Forest plot

```
forest(vas_metacont,
       sortvar = TE)
```

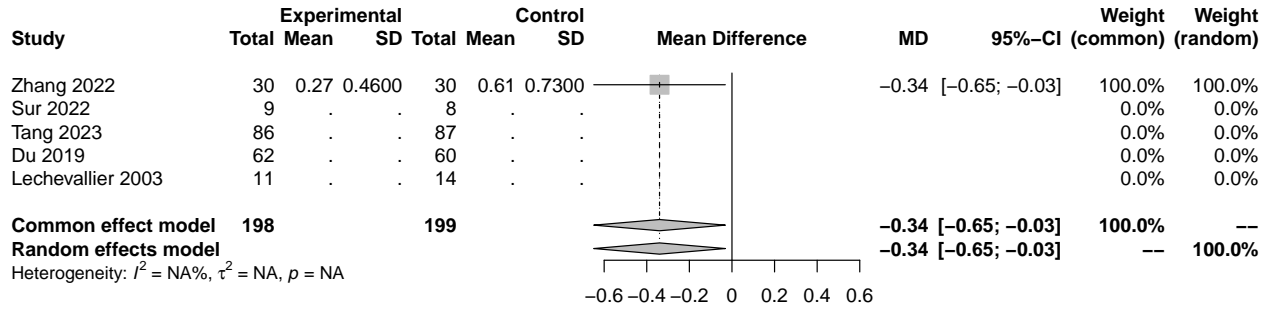

### 6.5.3 Trim and Fill

```
#trimfill(vas_metacont)  
#forest(trimfill(vas_metacont))
```

### 6.5.4 Funnel plot

```
funnel((vas_metacont))
```

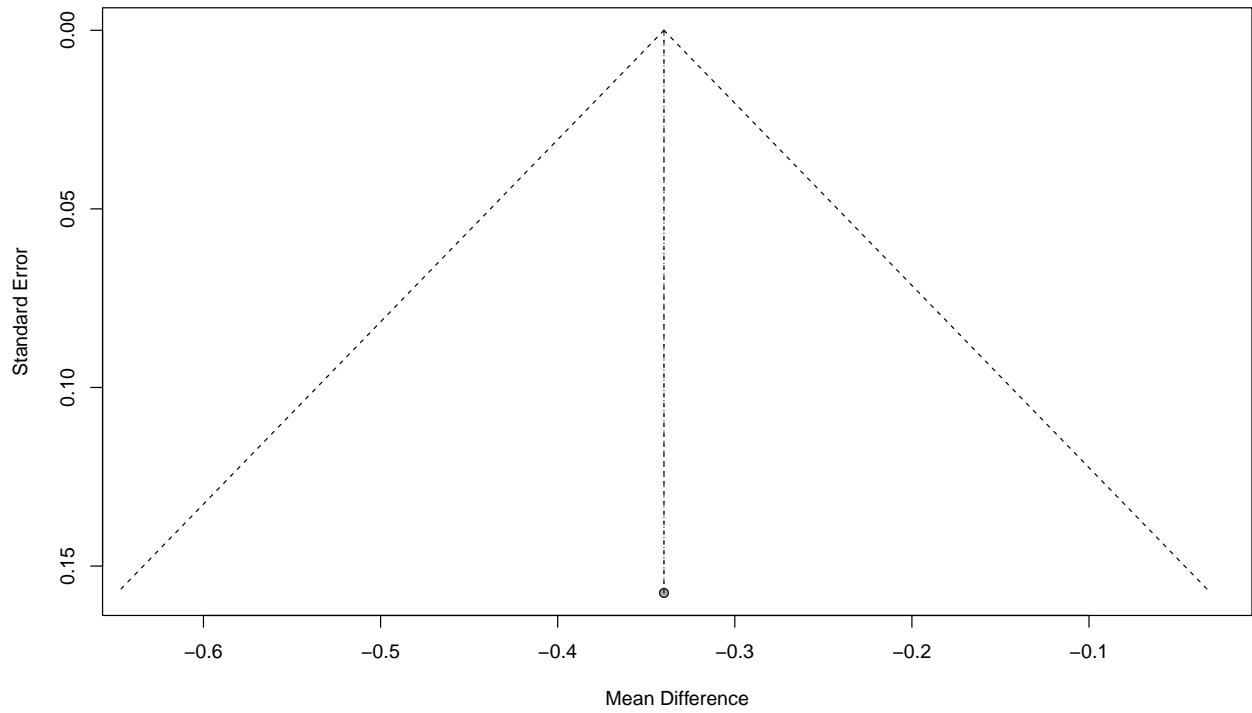

### 6.5.5 Baujat

```
baujat(vas_metacont, pos = 1)
```

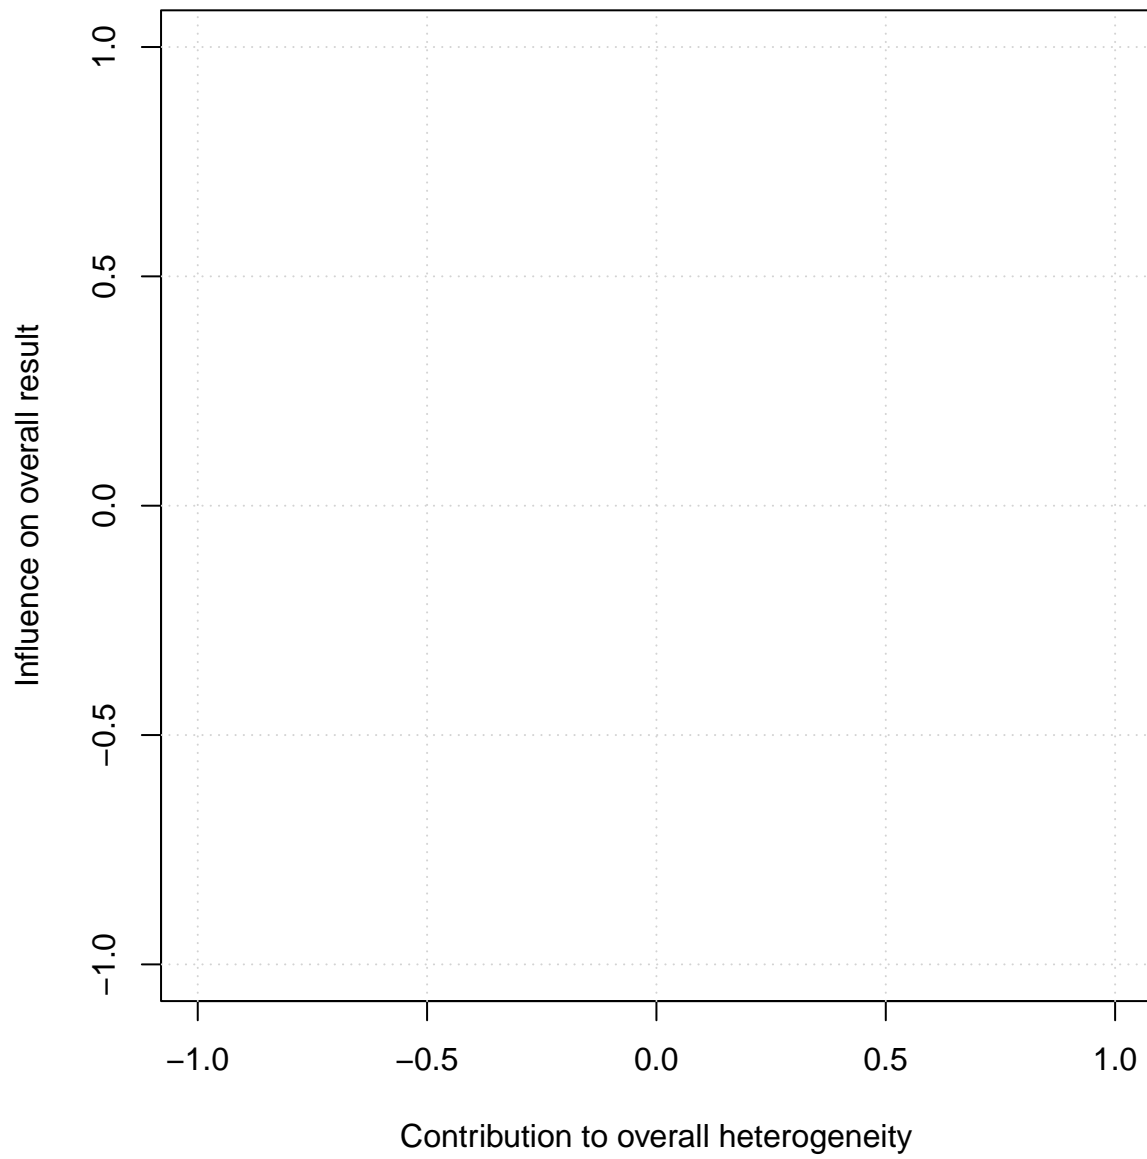

### 6.5.6 Leave one out

```
metainf(vas_metacont)
```

```
## Influential analysis (common effect model)
##
##
##           MD           95%-CI p-value tau^2 tau I^2
## Omitting Sur 2022      -0.3400 [-0.6488; -0.0312] 0.0309
## Omitting Tang 2023     -0.3400 [-0.6488; -0.0312] 0.0309
## Omitting Du 2019       -0.3400 [-0.6488; -0.0312] 0.0309
## Omitting Lechevallier 2003 -0.3400 [-0.6488; -0.0312] 0.0309
## Omitting Zhang 2022
##
## Pooled estimate      -0.3400 [-0.6488; -0.0312] 0.0309
##
## Details on meta-analytical method:
## - Inverse variance method
## - Restricted maximum-likelihood estimator for tau^2
```



## 6.6 LoS

### 6.6.1 Meta-analysis

```
los_metacont <- metacont(data = rct_only,
                        mean.c = los_days_mean_control,
                        sd.c = los_days_sd_control,
                        mean.e = los_days_mean_suction,
                        sd.e = los_days_sd_suction,
                        n.e = sample_size_suction,
                        n.c = sample_size_control,
                        studlab = author_year)

los_metacont

## Number of studies: k = 2
## Number of observations: o = 397
##
##              MD              95%-CI      z p-value
## Common effect model -0.4332 [-0.8175; -0.0488] -2.21 0.0272
## Random effects model -0.4835 [-1.2668; 0.2998] -1.21 0.2264
##
## Quantifying heterogeneity:
## tau^2 = 0.2409; tau = 0.4908; I^2 = 75.3% [0.0%; 94.4%]; H = 2.01 [1.00; 4.23]
##
## Test of heterogeneity:
##   Q d.f. p-value
## 4.04  1 0.0443
##
## Details on meta-analytical method:
## - Inverse variance method
## - Restricted maximum-likelihood estimator for tau^2
```

## 6.6.2 Forest plot

```
forest(los_metacont,
       sortvar = TE)
```

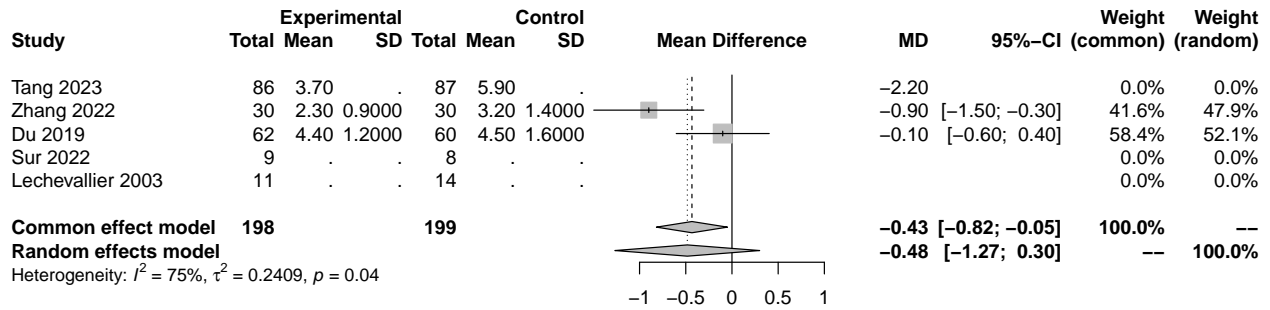

### 6.6.3 Trim and Fill

```
#trimfill(los_metacont)  
#forest(trimfill(los_metacont),  
#      sortvar = TE)
```

### 6.6.4 Funnel plot

```
funnel((los_metacont))
```

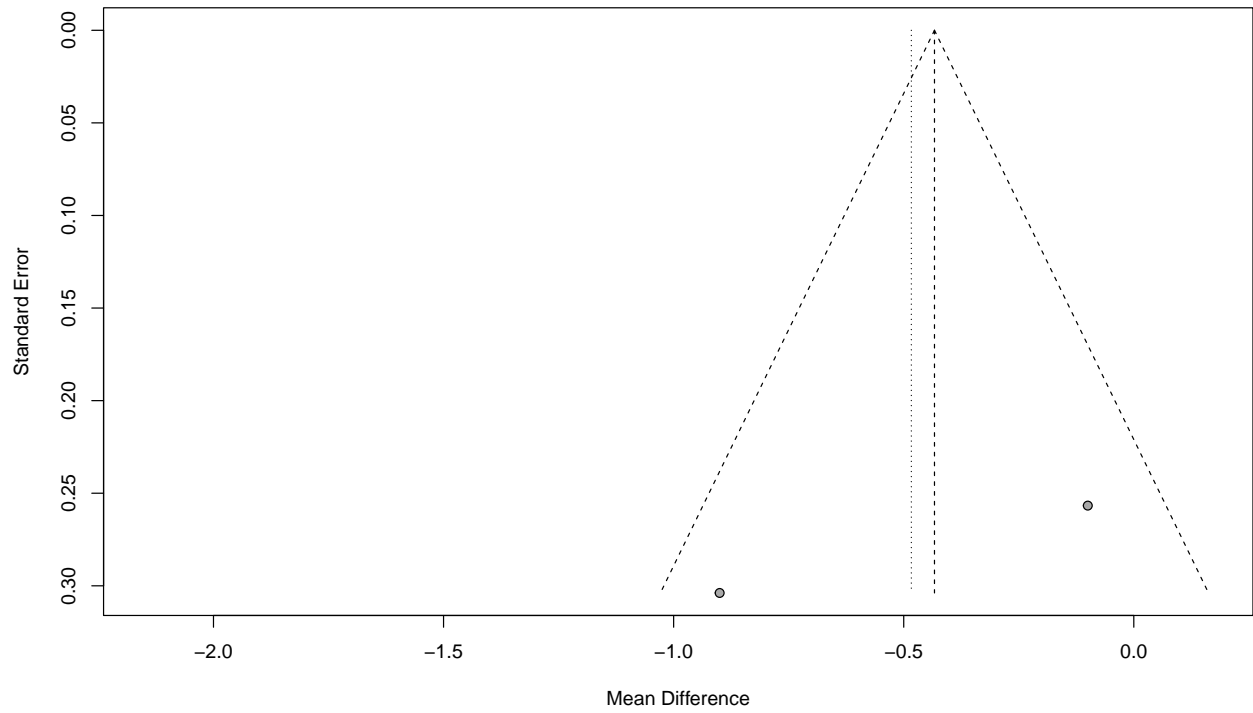

### 6.6.5 Baujat

```
baujat(los_metacont, pos = 1)
```

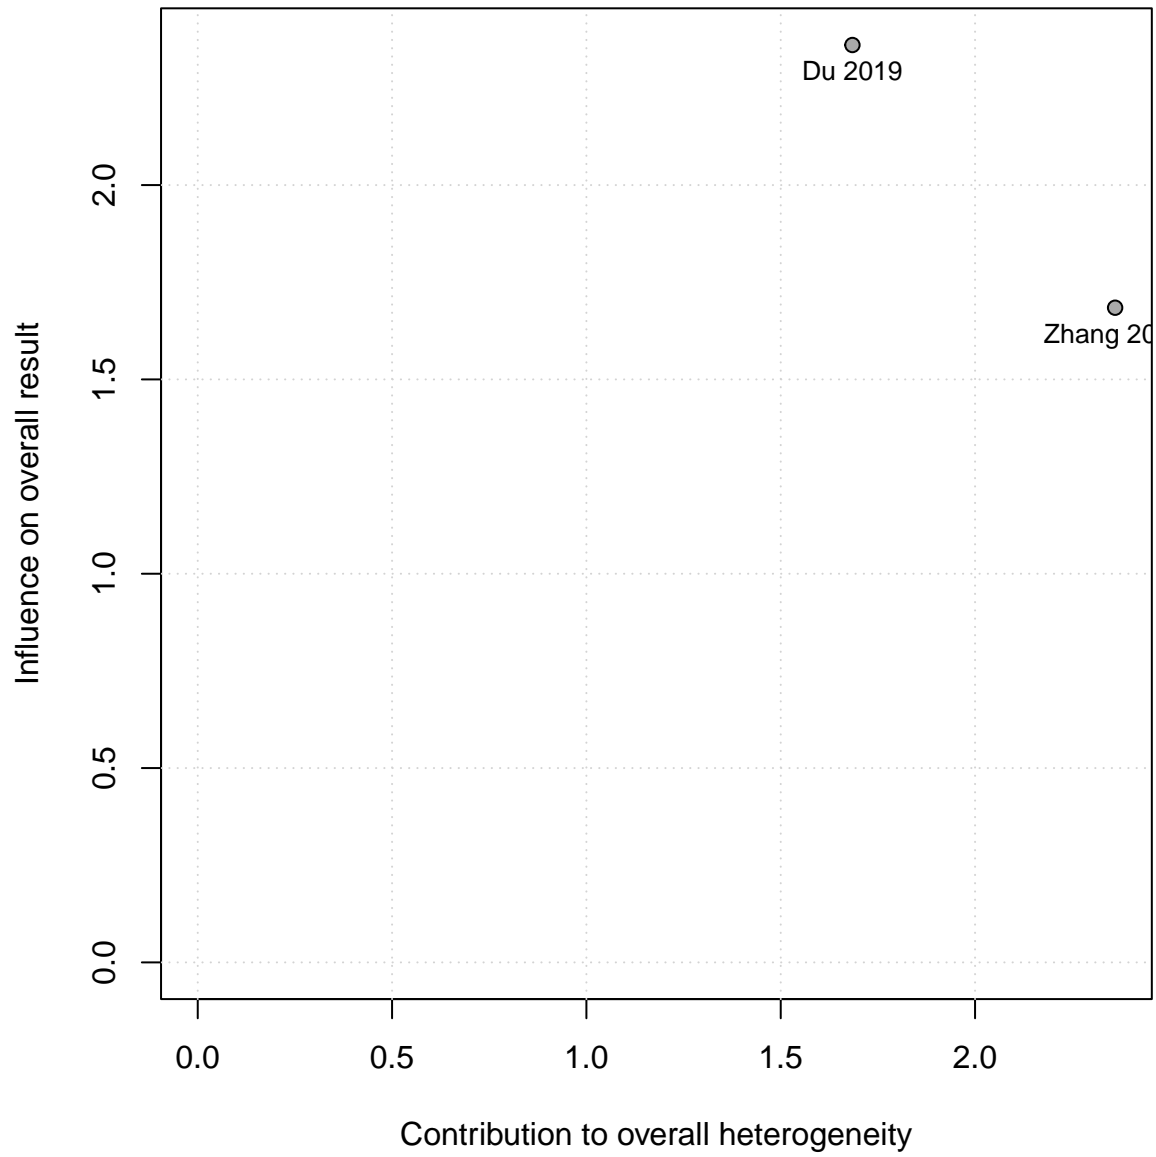

### 6.6.6 Leave one out

```
metainf(los_metacont)
```

```
## Influential analysis (common effect model)
##
##           MD           95%-CI p-value  tau^2    tau
## Omitting Sur 2022      -0.4332 [-0.8175; -0.0488]  0.0272  0.2409  0.4908
## Omitting Tang 2023     -0.4332 [-0.8175; -0.0488]  0.0272  0.2409  0.4908
## Omitting Du 2019       -0.9000 [-1.4956; -0.3044]  0.0031
## Omitting Lechevallier 2003 -0.4332 [-0.8175; -0.0488]  0.0272  0.2409  0.4908
## Omitting Zhang 2022    -0.1000 [-0.6031;  0.4031]  0.6969
##
## Pooled estimate      -0.4332 [-0.8175; -0.0488]  0.0272  0.2409  0.4908
##           I^2
## Omitting Sur 2022      75.3%
## Omitting Tang 2023     75.3%
## Omitting Du 2019
## Omitting Lechevallier 2003 75.3%
## Omitting Zhang 2022
##
## Pooled estimate      75.3%
##
## Details on meta-analytical method:
## - Inverse variance method
## - Restricted maximum-likelihood estimator for tau^2
```

## 6.7 Complications - All

### 6.7.1 Meta-analysis

```
comp_metabin <- metabin(data = rct_only,
                        event.c = complications_postop_overall_n_control,
                        n.c = sample_size_control,
                        event.e = complications_postop_overall_n_suction,
                        n.e = sample_size_suction,
                        studlab = author_year)

comp_metabin

## Number of studies: k = 4
## Number of observations: o = 397
## Number of events: e = 51
##
##              RR          95%-CI      z p-value
## Common effect model  0.1847 [0.0895; 0.3815] -4.56 < 0.0001
## Random effects model 0.1978 [0.0944; 0.4143] -4.30 < 0.0001
##
## Quantifying heterogeneity:
## tau^2 = 0 [0.0000; 11.1598]; tau = 0 [0.0000; 3.3406]
## I^2 = 0.0% [0.0%; 84.7%]; H = 1.00 [1.00; 2.56]
##
## Test of heterogeneity:
##   Q d.f. p-value
## 2.05  3 0.5623
##
## Details on meta-analytical method:
## - Mantel-Haenszel method
## - Inverse variance method
## - Restricted maximum-likelihood estimator for tau^2
## - Q-Profile method for confidence interval of tau^2 and tau
```

### 6.7.2 Forest plot

```
forest(comp_metabin,
       sortvar = TE)
```

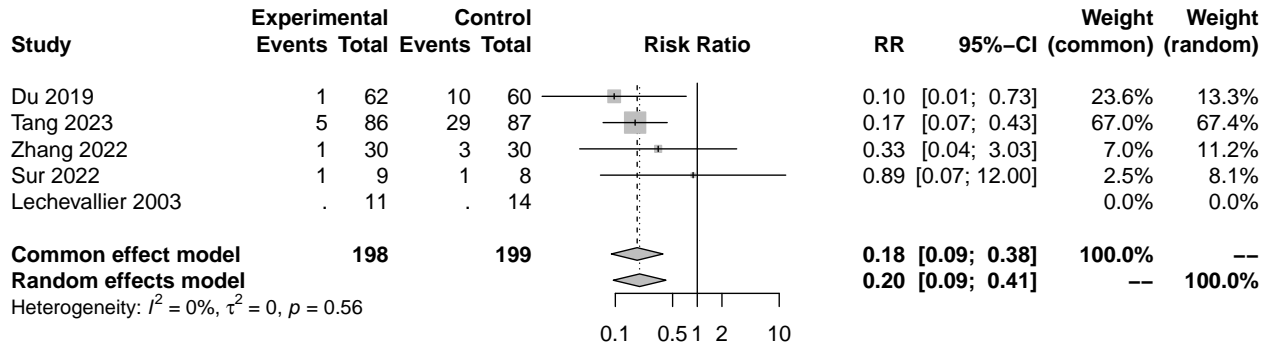



### 6.7.3 Trim and Fill

```
trimfill(comp_metabin)
```

```
## Warning in trimfill.meta(comp_metabin): 1 observation(s) dropped due to missing
## values

## Number of studies: k = 6 (with 2 added studies)
## Number of observations: o = 449
## Number of events: e = 57
##
##                RR          95%-CI      z p-value
## Random effects model 0.1582 [0.0804; 0.3114] -5.34 < 0.0001
##
## Quantifying heterogeneity:
## tau^2 < 0.0001 [0.0000; 7.1152]; tau = 0.0019 [0.0000; 2.6674]
## I^2 = 0.0% [0.0%; 74.6%]; H = 1.00 [1.00; 1.99]
##
## Test of heterogeneity:
##   Q d.f. p-value
## 4.53   5 0.4765
##
## Details on meta-analytical method:
## - Inverse variance method
## - Restricted maximum-likelihood estimator for tau^2
## - Q-Profile method for confidence interval of tau^2 and tau
## - Trim-and-fill method to adjust for funnel plot asymmetry (L-estimator)
```

```
forest(trimfill(comp_metabin),
        sortvar = TE)
```

```
## Warning in trimfill.meta(comp_metabin): 1 observation(s) dropped due to missing
## values
```

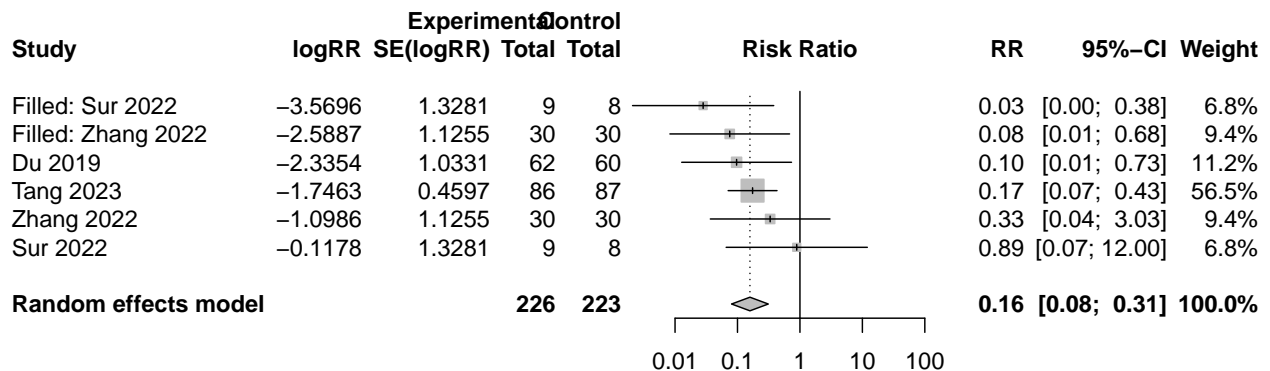

### 6.7.4 Funnel plot

```
funnel(trimfill(comp_metabin))
```

```
## Warning in trimfill.meta(comp_metabin): 1 observation(s) dropped due to missing  
## values
```

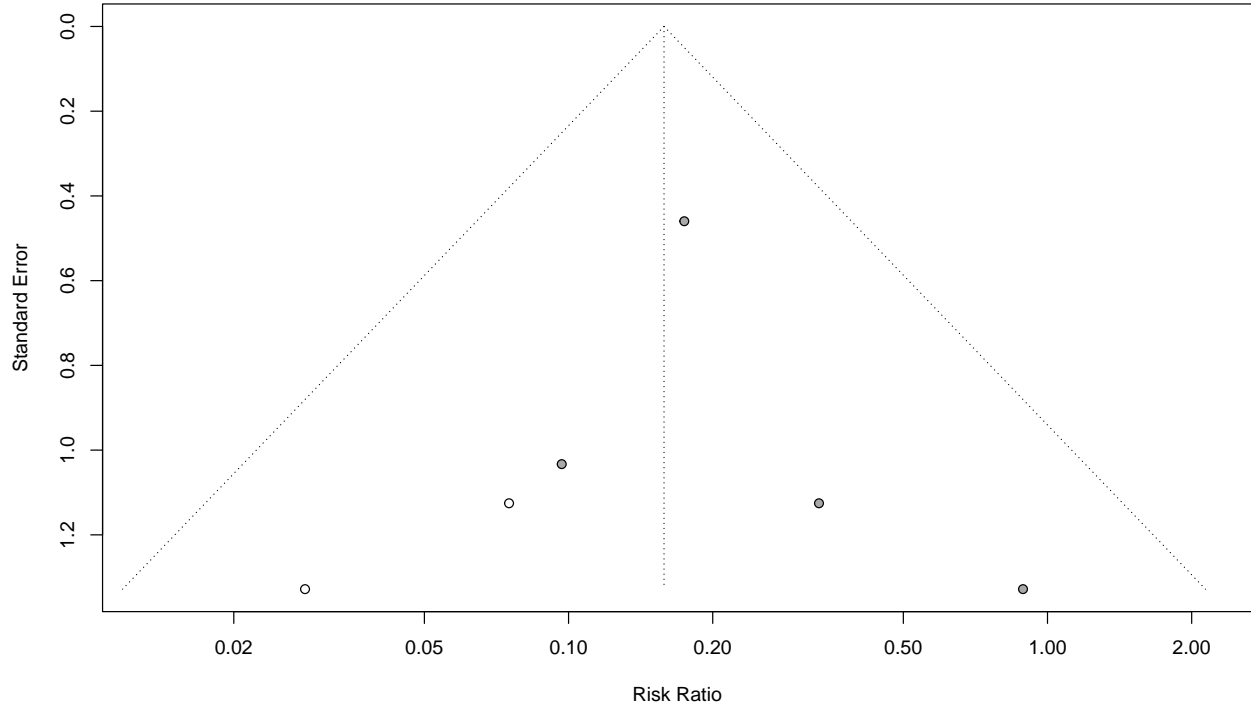

### 6.7.5 Baujat

```
baujat(comp_metabin, pos = 1)
```

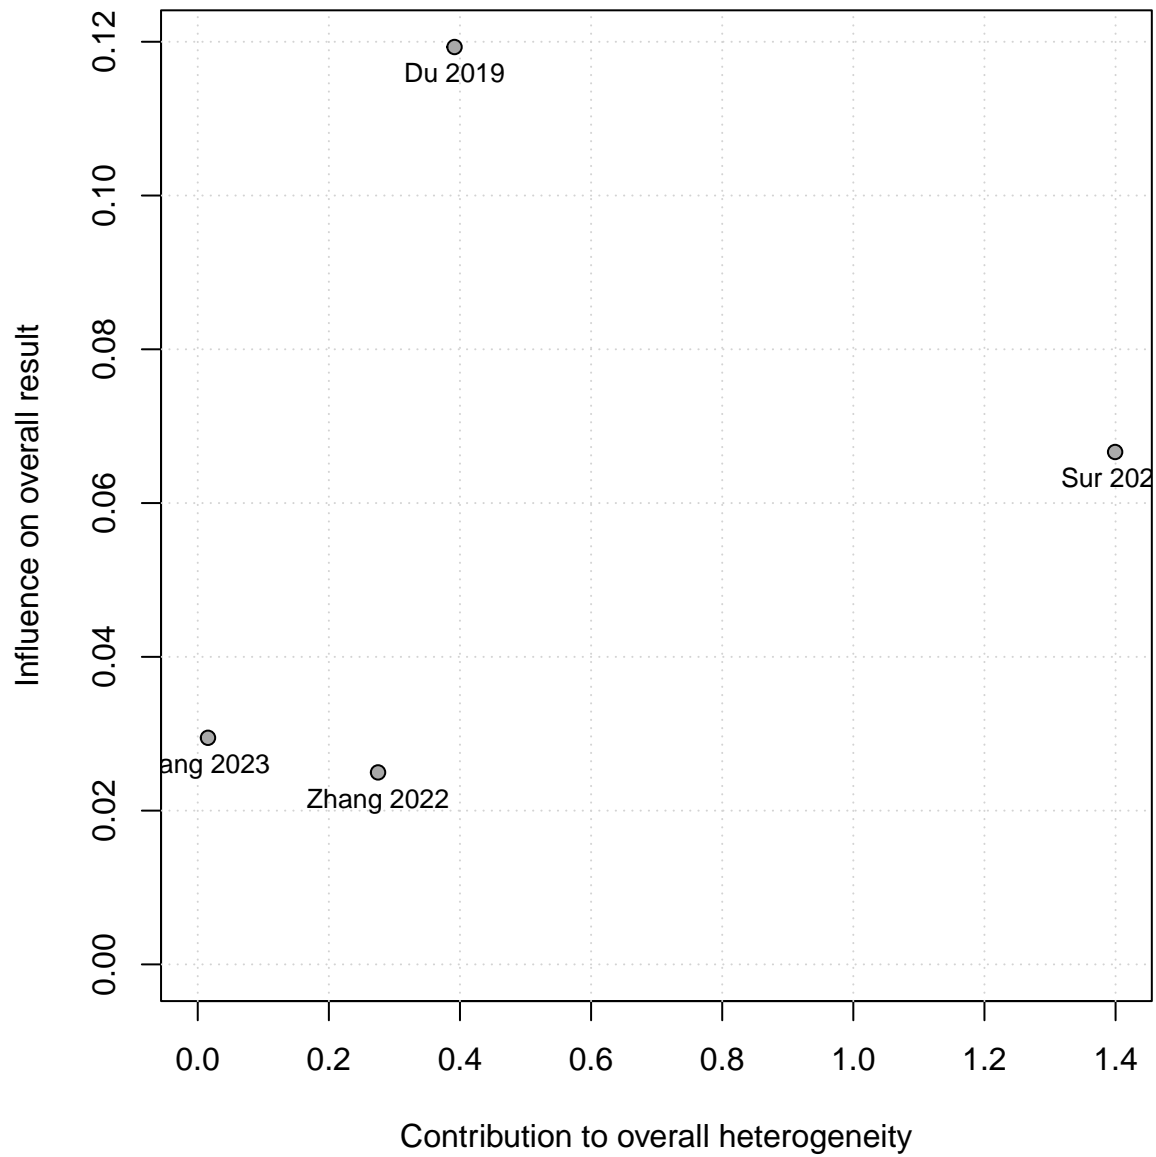

### 6.7.6 Leave one out

```
metainf(comp_metabin)
```

```
## Influential analysis (common effect model)
##
##
##           RR           95%-CI  p-value  tau^2    tau
## Omitting Sur 2022      0.1670 [0.0775; 0.3596] < 0.0001  0.0000  0.0000
## Omitting Tang 2023      0.2056 [0.0605; 0.6994]  0.0113  0.0000  0.0000
## Omitting Du 2019       0.2119 [0.0973; 0.4618] < 0.0001  0.0000  0.0000
## Omitting Lechevallier 2003 0.1847 [0.0895; 0.3815] < 0.0001  0.0000  0.0000
## Omitting Zhang 2022     0.1736 [0.0803; 0.3752] < 0.0001  0.0000  0.0012
##
## Pooled estimate        0.1847 [0.0895; 0.3815] < 0.0001  0.0000  0.0000
##
##           I^2
## Omitting Sur 2022      0.0%
## Omitting Tang 2023      0.0%
## Omitting Du 2019       0.0%
## Omitting Lechevallier 2003 0.0%
## Omitting Zhang 2022     0.0%
##
## Pooled estimate        0.0%
##
## Details on meta-analytical method:
## - Mantel-Haenszel method
## - Restricted maximum-likelihood estimator for tau^2
```

## 6.8 Fever

### 6.8.1 Meta-analysis

```
fever_metabin <- metabin(data = rct_only,
                        event.c = fever_n_control,
                        n.c = sample_size_control,
                        event.e = fever_n_suction,
                        n.e = sample_size_suction,
                        studlab = author_year)

fever_metabin

## Number of studies: k = 3
## Number of observations: o = 397
## Number of events: e = 23
##
##              RR          95%-CI      z p-value
## Common effect model 0.2096 [0.0728; 0.6031] -2.90 0.0038
## Random effects model 0.2165 [0.0747; 0.6277] -2.82 0.0048
##
## Quantifying heterogeneity:
## tau^2 = 0 [0.0000; 6.4956]; tau = 0 [0.0000; 2.5486]
## I^2 = 0.0% [0.0%; 89.6%]; H = 1.00 [1.00; 3.10]
##
## Test of heterogeneity:
##   Q d.f. p-value
## 0.33  2 0.8476
##
## Details on meta-analytical method:
## - Mantel-Haenszel method
## - Inverse variance method
## - Restricted maximum-likelihood estimator for tau^2
## - Q-Profile method for confidence interval of tau^2 and tau
```

## 6.8.2 Forest plot

```
forest(fever_metabin,
       sortvar = TE)
```

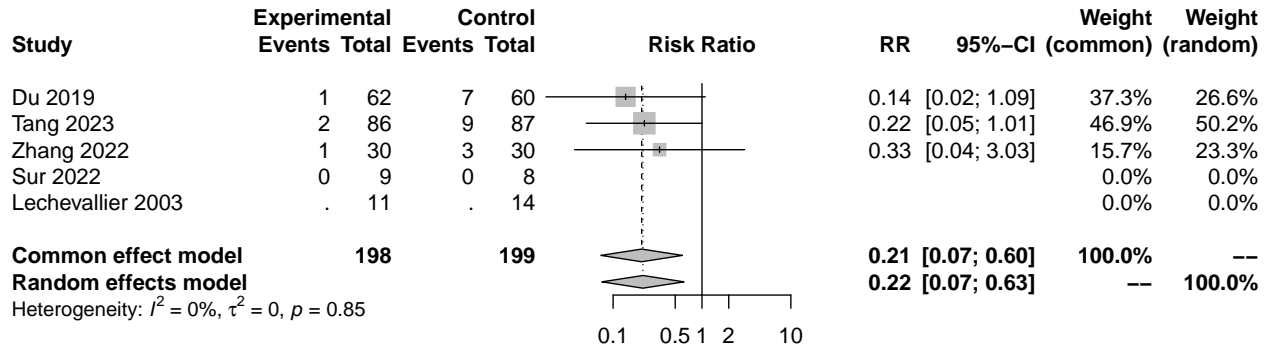

### 6.8.3 Trim and Fill

```
trimfill(fever_metabin)
```

```
## Warning in trimfill.meta(fever_metabin): 2 observation(s) dropped due to
## missing values

## Number of studies: k = 3 (with 0 added studies)
## Number of observations: o = 355
## Number of events: e = 23
##
##                RR          95%-CI      z p-value
## Random effects model 0.2165 [0.0747; 0.6277] -2.82  0.0048
##
## Quantifying heterogeneity:
## tau^2 = 0 [0.0000; 6.4956]; tau = 0 [0.0000; 2.5486]
## I^2 = 0.0% [0.0%; 89.6%]; H = 1.00 [1.00; 3.10]
##
## Test of heterogeneity:
##      Q d.f. p-value
## 0.33   2  0.8476
##
## Details on meta-analytical method:
## - Inverse variance method
## - Restricted maximum-likelihood estimator for tau^2
## - Q-Profile method for confidence interval of tau^2 and tau
## - Trim-and-fill method to adjust for funnel plot asymmetry (L-estimator)
```

```
forest(trimfill(fever_metabin),
        sortvar = TE)
```

```
## Warning in trimfill.meta(fever_metabin): 2 observation(s) dropped due to
## missing values
```

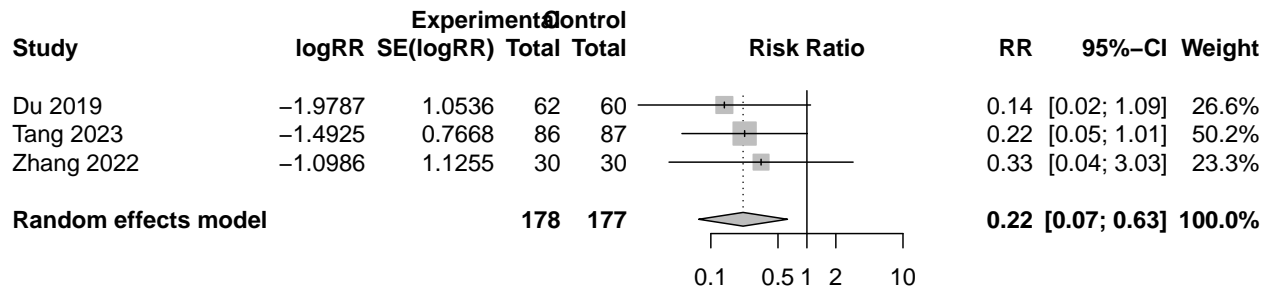

### 6.8.4 Funnel plot

```
funnel(trimfill(fever_metabin))
```

```
## Warning in trimfill.meta(fever_metabin): 2 observation(s) dropped due to  
## missing values
```

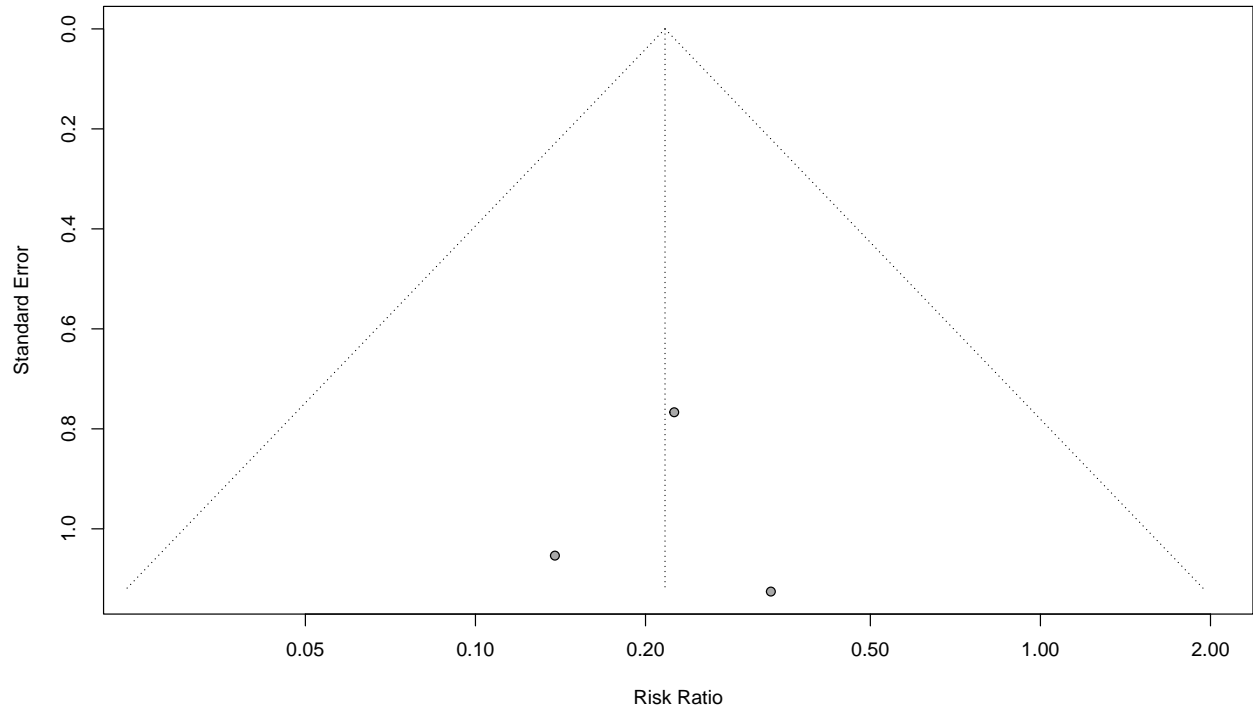



### 6.8.5 Baujat

```
baujat(fever_metabin, pos = 1)
```

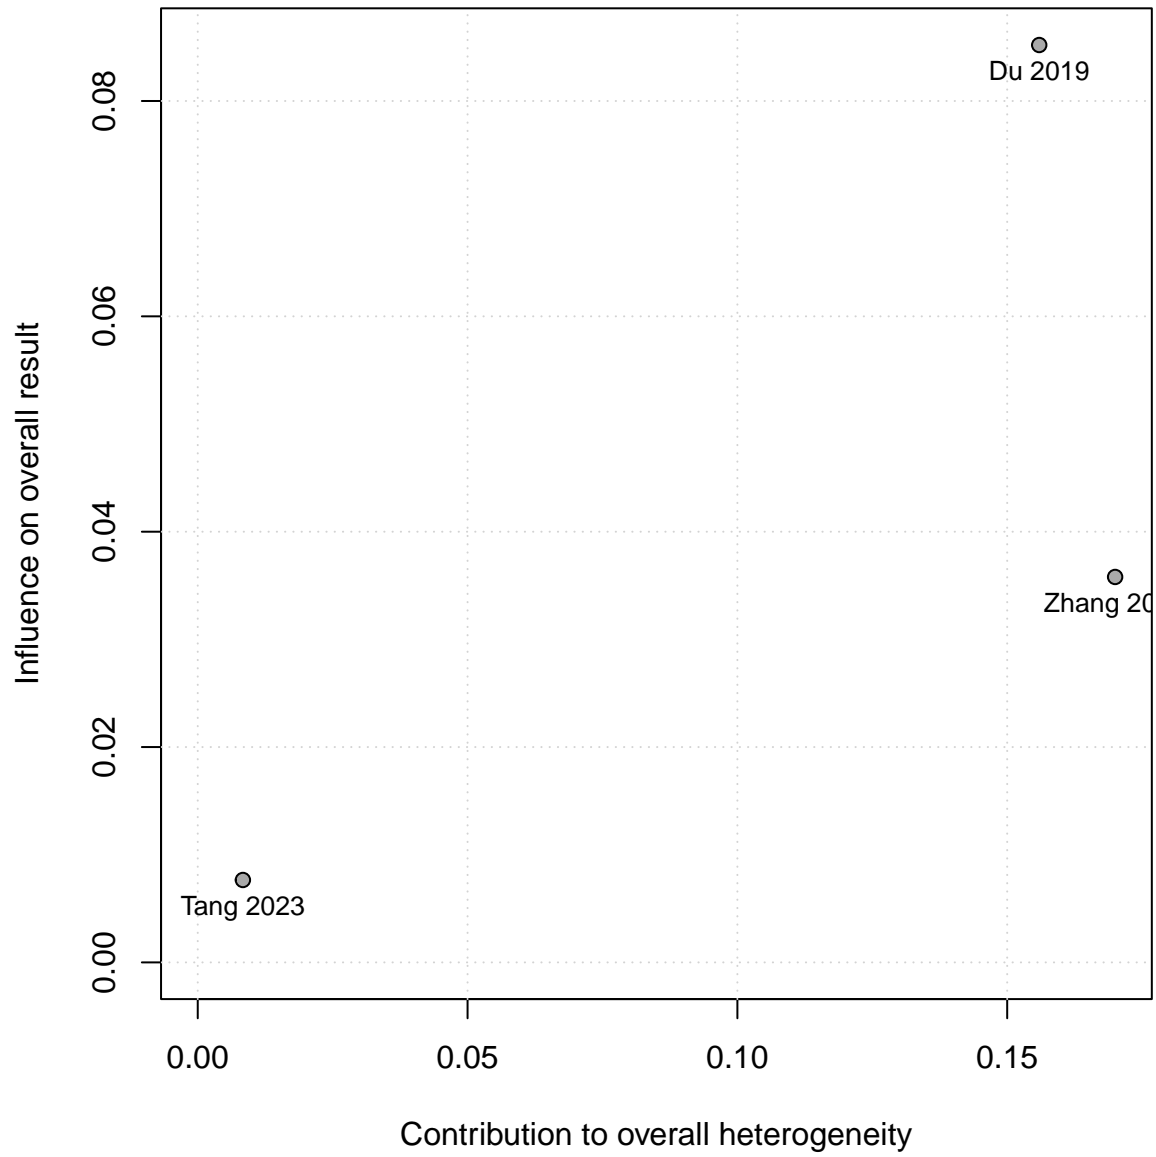

### 6.8.6 Leave one out

```
metainf(fever_metabin)
```

```
## Influential analysis (common effect model)
##
##
##           RR           95%-CI p-value   tau^2   tau
## Omitting Sur 2022      0.2096 [0.0728; 0.6031] 0.0038 0.0000 0.0000
## Omitting Tang 2023      0.1961 [0.0443; 0.8686] 0.0319 0.0000 0.0000
## Omitting Du 2019       0.2521 [0.0730; 0.8703] 0.0293 0.0000 0.0000
## Omitting Lechevallier 2003 0.2096 [0.0728; 0.6031] 0.0038 0.0000 0.0000
## Omitting Zhang 2022     0.1865 [0.0556; 0.6256] 0.0065 0.0000 0.0000
##
## Pooled estimate      0.2096 [0.0728; 0.6031] 0.0038 0.0000 0.0000
##
##           I^2
## Omitting Sur 2022      0.0%
## Omitting Tang 2023      0.0%
## Omitting Du 2019       0.0%
## Omitting Lechevallier 2003 0.0%
## Omitting Zhang 2022     0.0%
##
## Pooled estimate      0.0%
##
## Details on meta-analytical method:
## - Mantel-Haenszel method
## - Restricted maximum-likelihood estimator for tau^2
```

## 6.9 Infections

### 6.9.1 Meta-analysis

```
infection_metabin <- metabin(data = rct_only,
                             event.c = infection_n_control,
                             n.c = sample_size_control,
                             event.e = infection_n_suction,
                             n.e = sample_size_suction,
                             studlab = author_year)

infection_metabin

## Number of studies: k = 4
## Number of observations: o = 397
## Number of events: e = 24
##
##              RR          95%-CI      z p-value
## Common effect model 0.2165 [0.0797; 0.5882] -3.00 0.0027
## Random effects model 0.2241 [0.0820; 0.6126] -2.92 0.0036
##
## Quantifying heterogeneity:
## tau^2 = 0 [0.0000; 0.8702]; tau = 0 [0.0000; 0.9328]
## I^2 = 0.0% [0.0%; 84.7%]; H = 1.00 [1.00; 2.56]
##
## Test of heterogeneity:
##      Q d.f. p-value
## 0.37   3 0.9468
##
## Details on meta-analytical method:
## - Mantel-Haenszel method
## - Inverse variance method
## - Restricted maximum-likelihood estimator for tau^2
## - Q-Profile method for confidence interval of tau^2 and tau
## - Continuity correction of 0.5 in studies with zero cell frequencies
```

## 6.9.2 Forest plot

```
forest(infection_metabin,
       sortvar = TE)
```

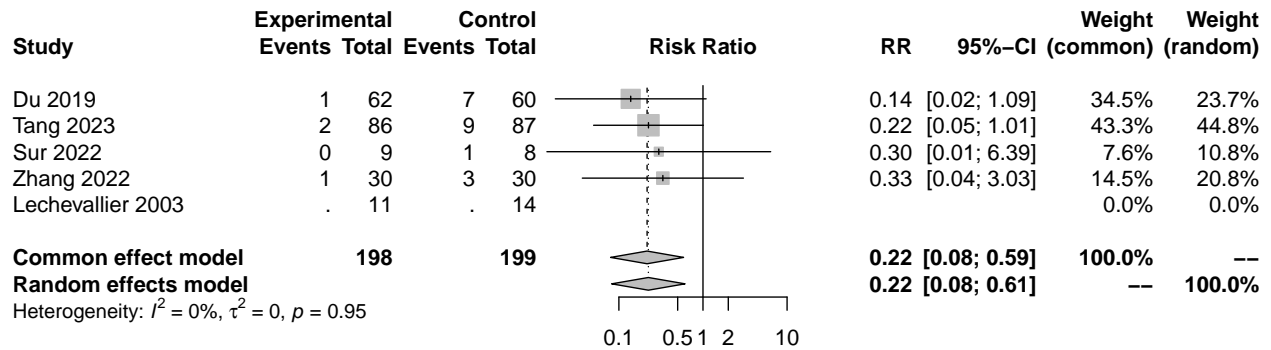

### 6.9.3 Trim and Fill

```
trimfill(infection_metabin)
```

```
## Warning in trimfill.meta(infection_metabin): 1 observation(s) dropped due to
## missing values
```

```
## Number of studies: k = 6 (with 2 added studies)
```

```
## Number of observations: o = 449
```

```
## Number of events: e = 29
```

```
##
```

```
##              RR          95%-CI      z p-value
```

```
## Random effects model 0.1900 [0.0791; 0.4565] -3.71 0.0002
```

```
##
```

```
## Quantifying heterogeneity:
```

```
## tau^2 = 0; tau = 0; I^2 = 0.0% [0.0%; 74.6%]; H = 1.00 [1.00; 1.99]
```

```
##
```

```
## Test of heterogeneity:
```

```
##      Q d.f. p-value
```

```
## 0.80   5 0.9767
```

```
##
```

```
## Details on meta-analytical method:
```

```
## - Inverse variance method
```

```
## - Restricted maximum-likelihood estimator for tau^2
```

```
## - Trim-and-fill method to adjust for funnel plot asymmetry (L-estimator)
```

```
forest(trimfill(infection_metabin),
        sortvar = TE)
```

```
## Warning in trimfill.meta(infection_metabin): 1 observation(s) dropped due to
## missing values
```

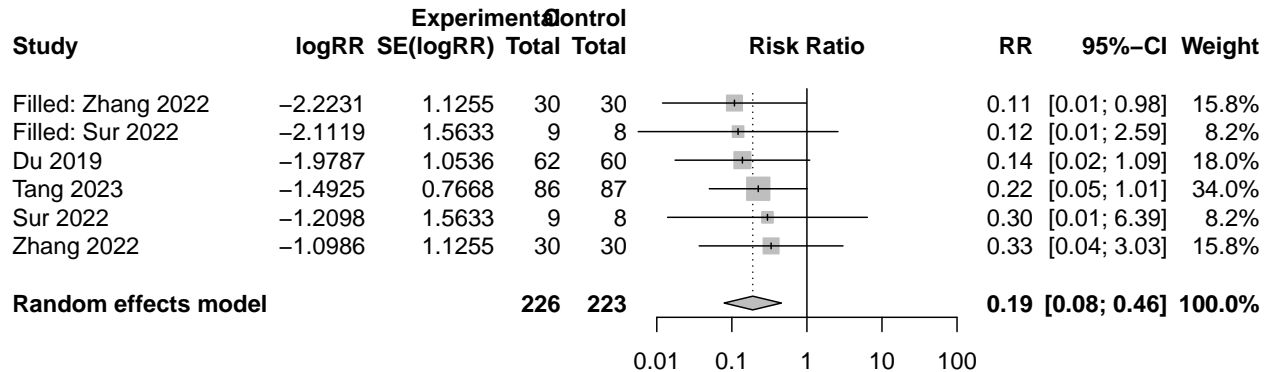

### 6.9.4 Funnel plot

```
funnel(trimfill(infection_metabin))
```

```
## Warning in trimfill.meta(infection_metabin): 1 observation(s) dropped due to  
## missing values
```

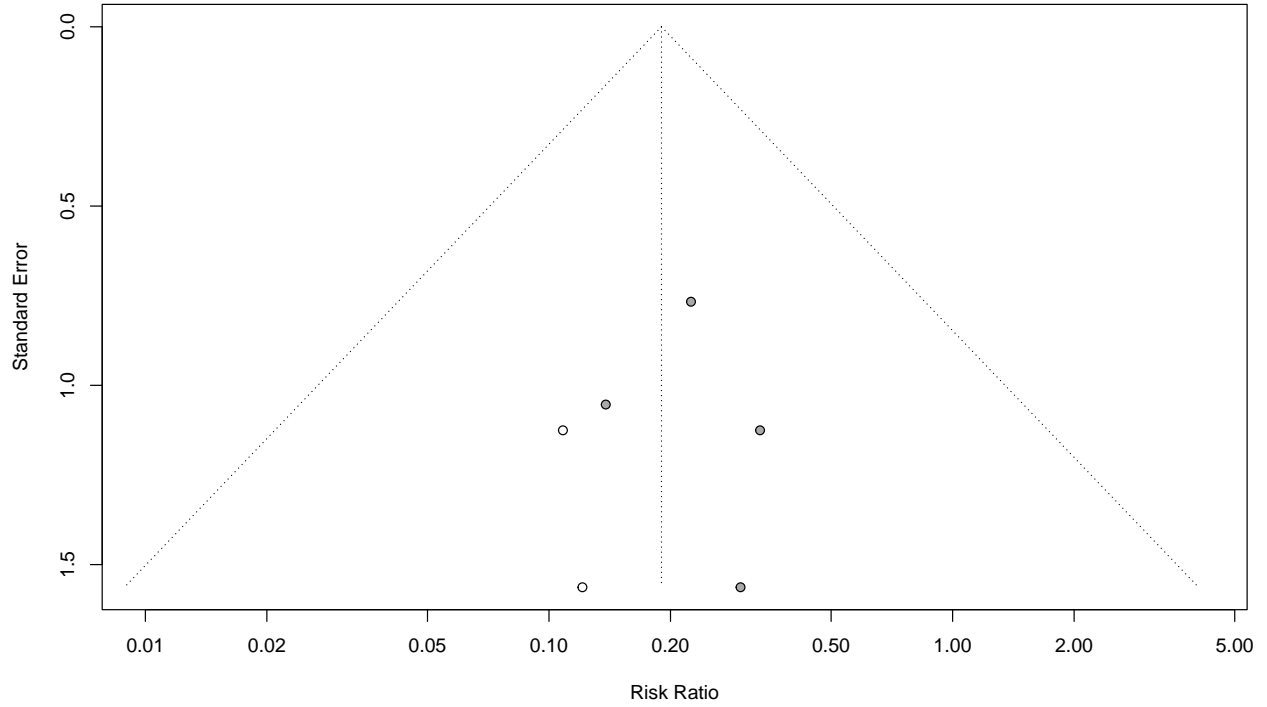

### 6.9.5 Baujat

```
baujat(infection_metabin, pos = 1)
```

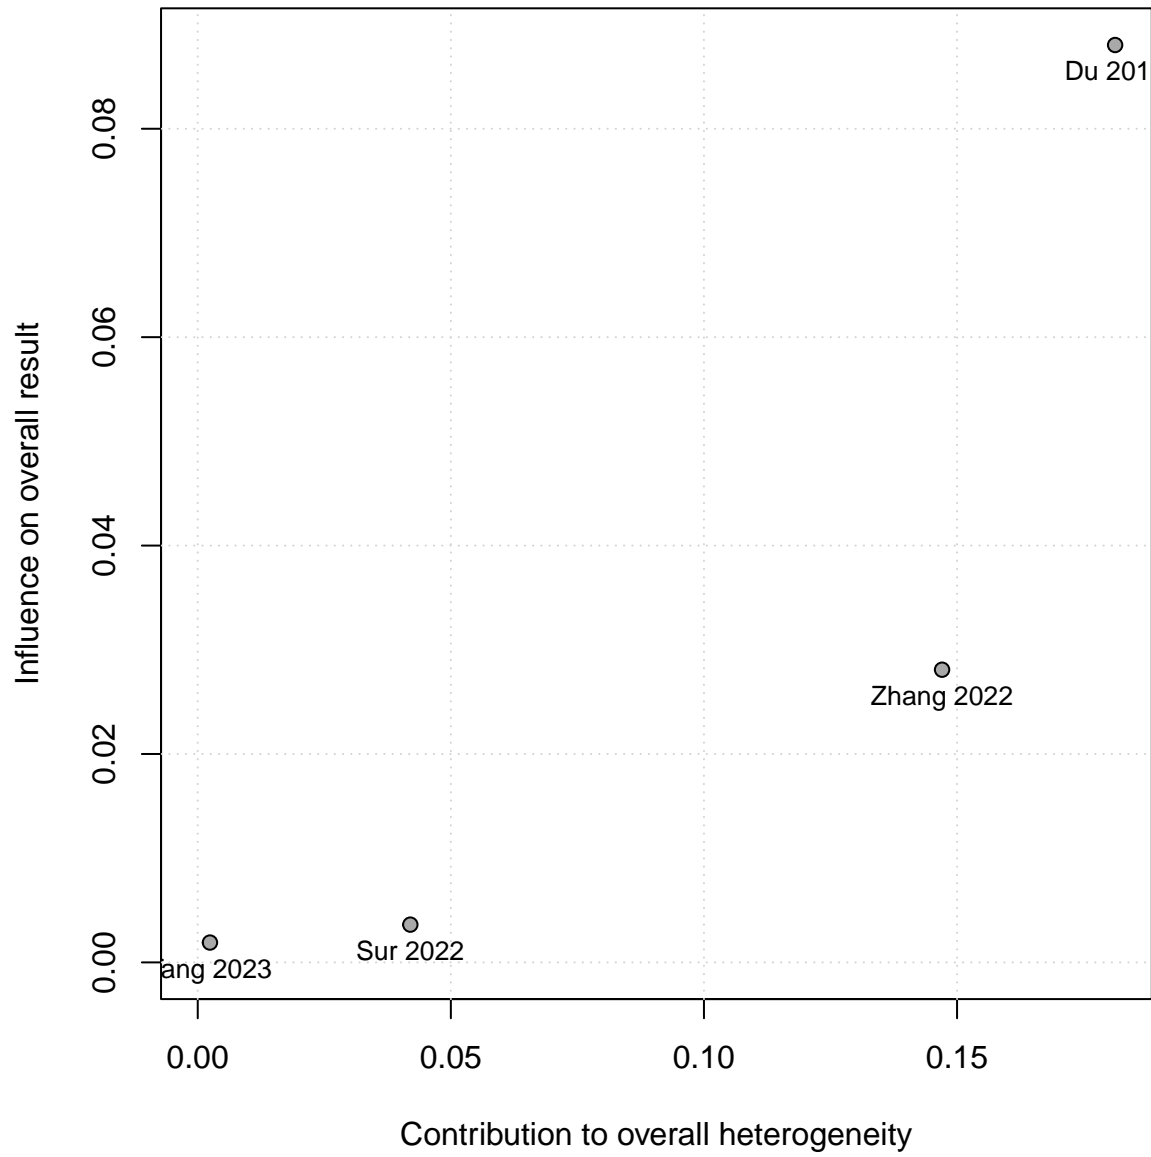

## 6.9.6 Leave one out

```
metainf(infection_metabin)
```

```
## Influential analysis (common effect model)
##
##           RR           95%-CI p-value   tau^2   tau
## Omitting Sur 2022      0.2096 [0.0728; 0.6031] 0.0038 0.0000 0.0000
## Omitting Tang 2023      0.2101 [0.0551; 0.8015] 0.0224 0.0000 0.0000
## Omitting Du 2019        0.2577 [0.0816; 0.8134] 0.0208 0.0000 0.0000
## Omitting Lechevallier 2003 0.2165 [0.0797; 0.5882] 0.0027 0.0000 0.0000
## Omitting Zhang 2022      0.1966 [0.0638; 0.6061] 0.0046 0.0000 0.0000
##
## Pooled estimate        0.2165 [0.0797; 0.5882] 0.0027 0.0000 0.0000
##           I^2
## Omitting Sur 2022      0.0%
## Omitting Tang 2023      0.0%
## Omitting Du 2019        0.0%
## Omitting Lechevallier 2003 0.0%
## Omitting Zhang 2022      0.0%
##
## Pooled estimate        0.0%
##
## Details on meta-analytical method:
## - Mantel-Haenszel method
## - Restricted maximum-likelihood estimator for tau^2
```



## 6.10 Sepsis

### 6.10.1 Meta-analysis

```
sepsis_metabin <- metabin(data = rct_only,
                          event.c = sepsis_n_control,
                          n.c = sample_size_control,
                          event.e = sepsis_n_suction,
                          n.e = sample_size_suction,
                          studlab = author_year)

sepsis_metabin

## Number of studies: k = 1
## Number of observations: o = 397
## Number of events: e = 4
##
##              RR          95%-CI    z p-value
## Common effect model 0.1124 [0.0061; 2.0562] -1.47 0.1405
## Random effects model 0.1124 [0.0061; 2.0562] -1.47 0.1405
##
## Quantifying heterogeneity:
## tau^2 = NA; tau = NA; I^2 = NA; H = NA
##
## Details on meta-analytical method:
## - Mantel-Haenszel method
## - Inverse variance method
## - Restricted maximum-likelihood estimator for tau^2
## - Continuity correction of 0.5 in studies with zero cell frequencies
```

### 6.10.2 Forest plot

```
forest(sepsis_metabin,
       sortvar = TE)
```

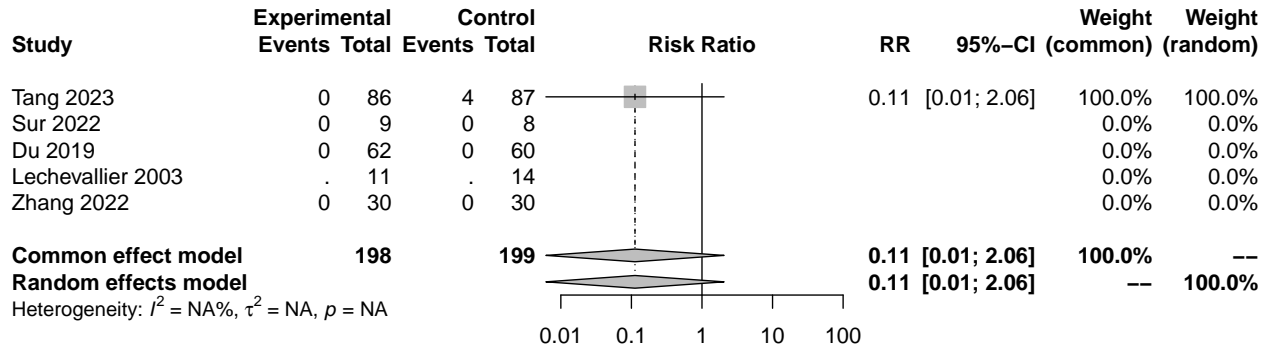

### 6.10.3 Trim and Fill

```
#trimfill(sepsis_metabin)  
#forest(trimfill(sepsis_metabin),  
#      sortvar = TE)
```

### 6.10.4 Funnel plot

```
funnel((sepsis_metabin))
```

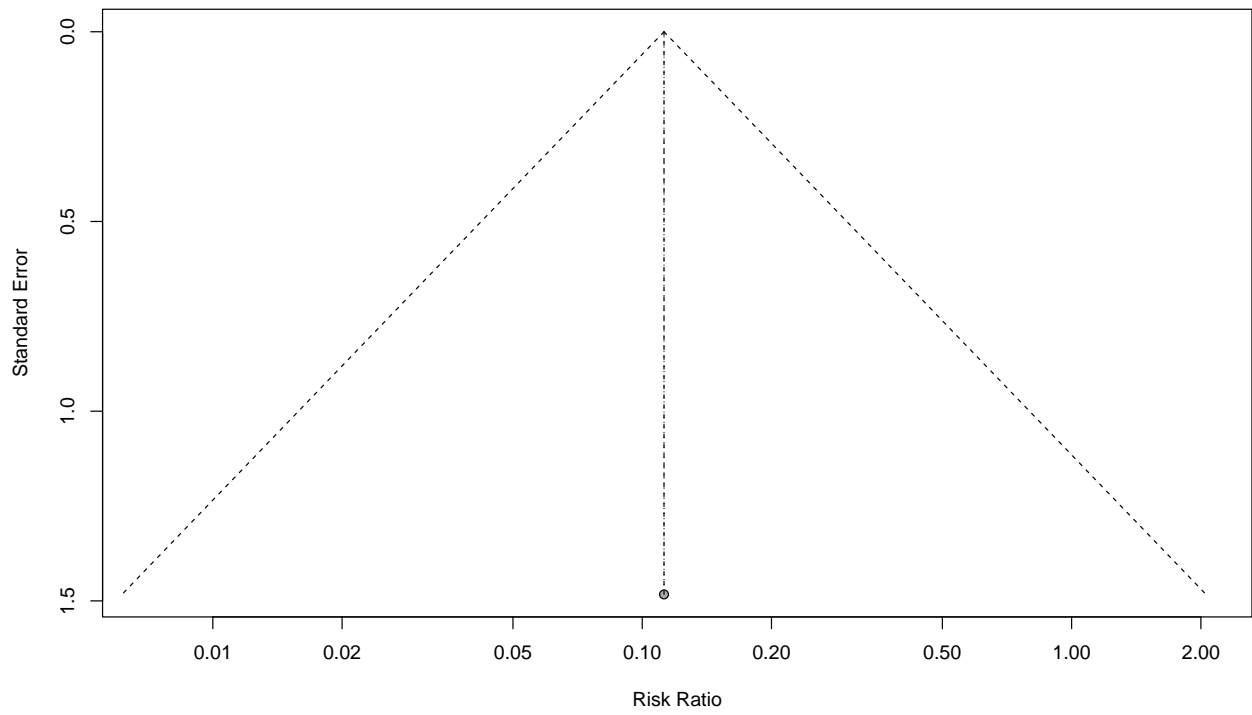

### 6.10.5 Baujat

```
baujat(sepsis_metabin, pos = 1)
```

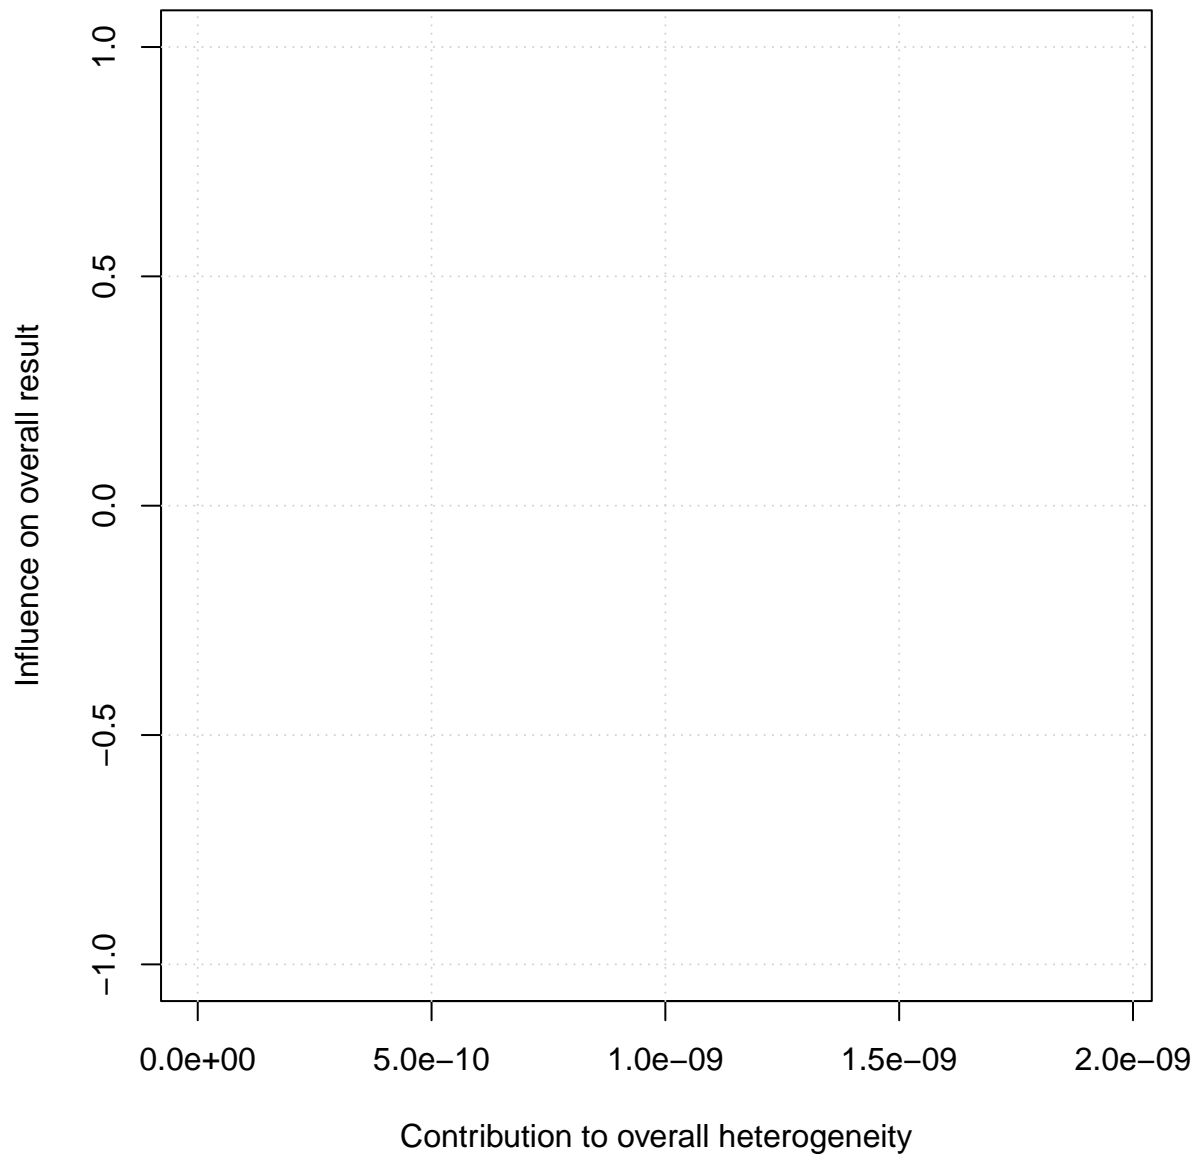

### 6.10.6 Leave one out

```
metainf(sepsis_metabin)
```

```
## Influential analysis (common effect model)
##
##
##           RR           95%-CI p-value tau^2 tau I^2
## Omitting Sur 2022      0.1124 [0.0061; 2.0562] 0.1405
## Omitting Tang 2023
## Omitting Du 2019       0.1124 [0.0061; 2.0562] 0.1405
## Omitting Lechevallier 2003 0.1124 [0.0061; 2.0562] 0.1405
## Omitting Zhang 2022    0.1124 [0.0061; 2.0562] 0.1405
##
## Pooled estimate       0.1124 [0.0061; 2.0562] 0.1405
##
## Details on meta-analytical method:
## - Mantel-Haenszel method
## - Restricted maximum-likelihood estimator for tau^2
```

## 6.11 Abscess

### 6.11.1 Meta-analysis

```
abscess_metabin <- metabin(data = rct_only,
                           event.c = abscess_n_control,
                           n.c = sample_size_control,
                           event.e = abscess_n_suction,
                           n.e = sample_size_suction,
                           studlab = author_year)

abscess_metabin

## Number of studies: k = 0
## Number of observations: o = 397
## Number of events: e = 0
##
##                RR 95%-CI  z p-value
## Common effect model  NA      --      --
## Random effects model NA      --      --
##
## Quantifying heterogeneity:
## tau^2 = NA; tau = NA; I^2 = NA; H = NA
##
## Details on meta-analytical method:
## - Mantel-Haenszel method
## - Inverse variance method
## - Restricted maximum-likelihood estimator for tau^2
```

### 6.11.2 Forest plot

```
forest(abscess_metabin,
       sortvar = TE)
```

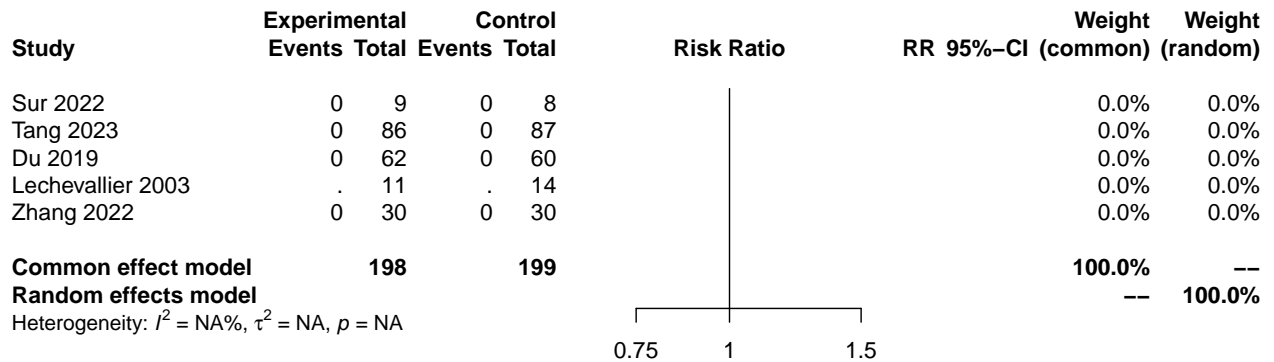



### 6.11.3 Trim and Fill

```
#trimfill(abscess_metabin)  
#forest(trimfill(abscess_metabin),  
#      sortvar = TE)
```

#### 6.11.4 Funnel plot

```
#funnel((abscess_metabin))
```

### 6.11.5 Baujat

```
#baujat(abscess_metabin, pos = 1)
```

### 6.11.6 Leave one out

```
#metainf(abscess_metabin)
```

## 6.12 Haematoma

### 6.12.1 Meta-analysis

```
haematoma_metabin <- metabin(data = rct_only,
                             event.c = hematoma_n_control,
                             n.c = sample_size_control,
                             event.e = hematoma_n_suction,
                             n.e = sample_size_suction,
                             studlab = author_year)
```

```
haematoma_metabin
```

```
## Number of studies: k = 0
## Number of observations: o = 397
## Number of events: e = 0
##
##                RR 95%-CI  z p-value
## Common effect model  NA      --      --
## Random effects model NA      --      --
##
## Quantifying heterogeneity:
## tau^2 = NA; tau = NA; I^2 = NA; H = NA
##
## Details on meta-analytical method:
## - Mantel-Haenszel method
## - Inverse variance method
## - Restricted maximum-likelihood estimator for tau^2
```

### 6.12.2 Forest plot

```
forest(haematoma_metabin,
       sortvar = TE)
```

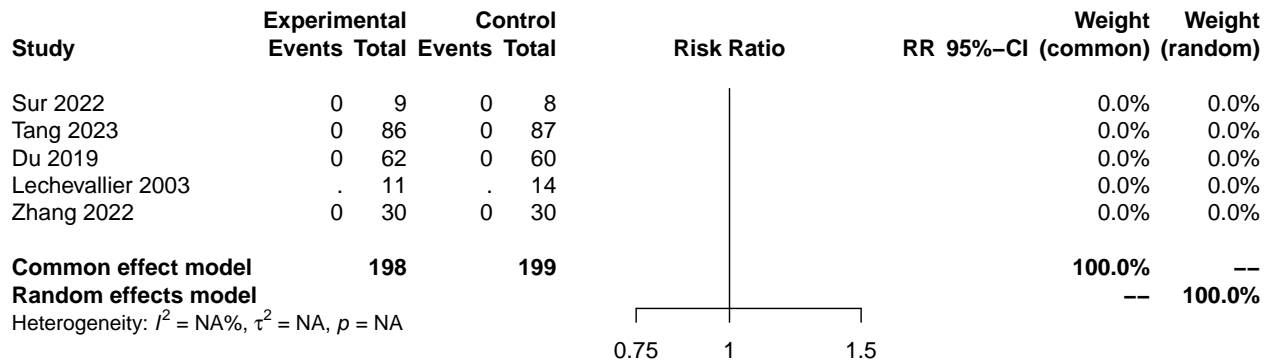

### 6.12.3 Trim and Fill

```
#trimfill(haematoma_metabin)  
#forest(trimfill(haematoma_metabin),  
#      sortvar = TE)
```

#### 6.12.4 Funnel plot

```
#funnel((haematoma_metabin))
```



### 6.12.5 Baujat

```
#baujat(haematoma_metabin, pos = 1)
```

### 6.12.6 Leave one out

```
#metainf(haematoma_metabin)
```

## 6.13 Pain

### 6.13.1 Meta-analysis

```
pain_metabin <- metabin(data = rct_only,
                        event.c = pain_n_control,
                        n.c = sample_size_control,
                        event.e = pain_n_suction,
                        n.e = sample_size_suction,
                        studlab = author_year)

pain_metabin

## Number of studies: k = 1
## Number of observations: o = 397
## Number of events: e = 15
##
##              RR          95%-CI      z p-value
## Common effect model 0.1556 [0.0362; 0.6692] -2.50 0.0124
## Random effects model 0.1556 [0.0362; 0.6692] -2.50 0.0124
##
## Quantifying heterogeneity:
## tau^2 = NA; tau = NA; I^2 = NA; H = NA
##
## Details on meta-analytical method:
## - Mantel-Haenszel method
## - Inverse variance method
## - Restricted maximum-likelihood estimator for tau^2
```

### 6.13.2 Forest plot

```
forest(pain_metabin,
       sortvar = TE)
```

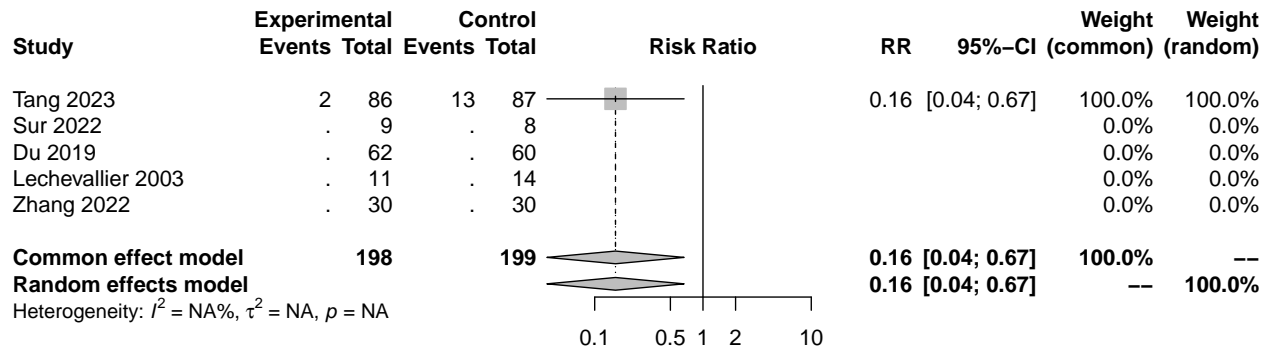

### 6.13.3 Trim and Fill

```
#trimfill(pain_metabin)  
#forest(trimfill(pain_metabin),  
#      sortvar = TE)
```

### 6.13.4 Funnel plot

```
funnel((pain_metabin))
```

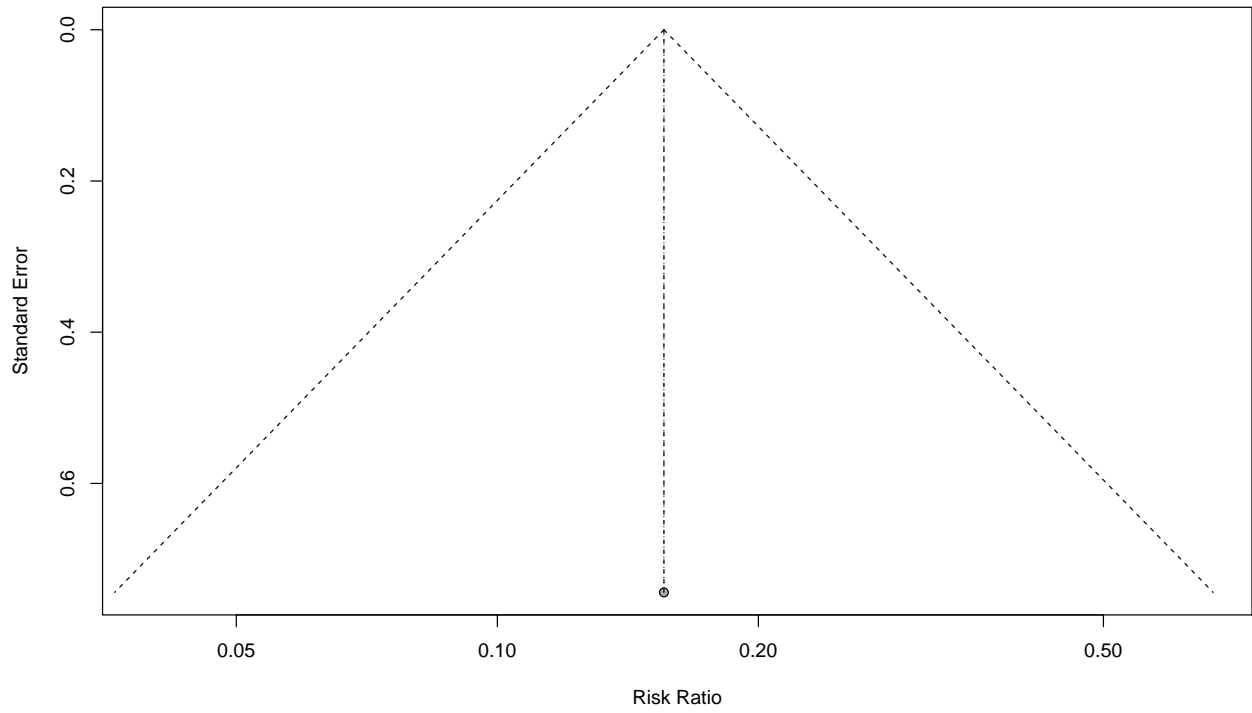

### 6.13.5 Baujat

```
baujat(pain_metabin, pos = 1)
```

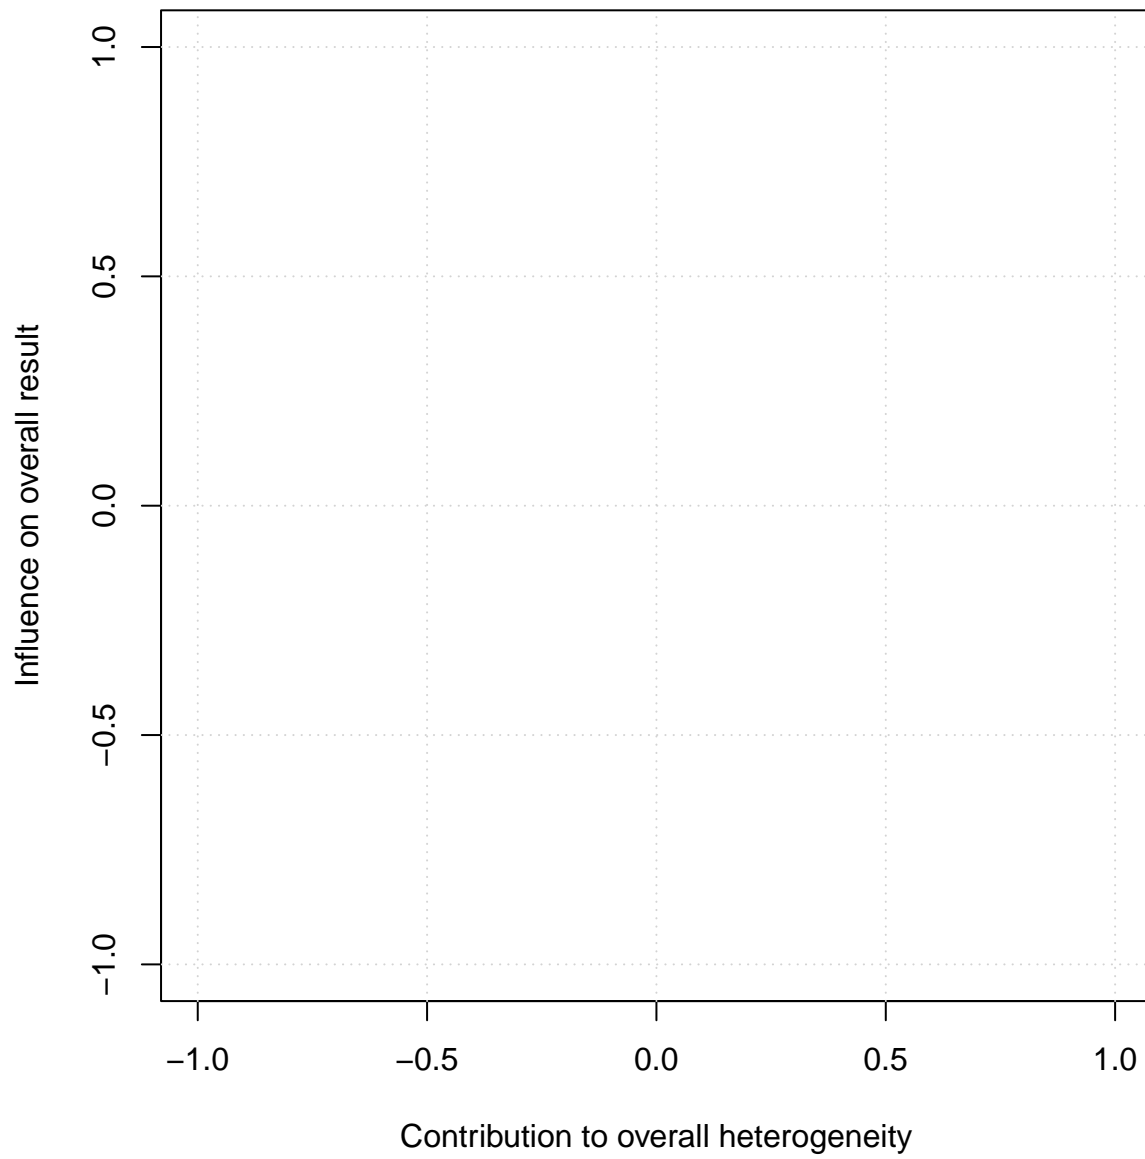

### 6.13.6 Leave one out

```
metainf(pain_metabin, pos = 1)
```

```
## Influential analysis (common effect model)
##
##
##          RR          95%-CI p-value tau^2 tau I^2
## Omitting Sur 2022      0.1556 [0.0362; 0.6692] 0.0124
## Omitting Tang 2023
## Omitting Du 2019      0.1556 [0.0362; 0.6692] 0.0124
## Omitting Lechevallier 2003 0.1556 [0.0362; 0.6692] 0.0124
## Omitting Zhang 2022    0.1556 [0.0362; 0.6692] 0.0124
##
## Pooled estimate      0.1556 [0.0362; 0.6692] 0.0124
##
## Details on meta-analytical method:
## - Mantel-Haenszel method
## - Restricted maximum-likelihood estimator for tau^2
```



## 6.14 Stricture

### 6.14.1 Meta-analysis

```
stricture_metabin <- metabin(data = rct_only,
                             event.c = stricture_n_control,
                             n.c = sample_size_control,
                             event.e = stricture_n_suction,
                             n.e = sample_size_suction,
                             studlab = author_year)

stricture_metabin

## Number of studies: k = 1
## Number of observations: o = 397
## Number of events: e = 3
##
##              RR          95%-CI      z p-value
## Common effect model 0.1383 [0.0073; 2.6222] -1.32 0.1876
## Random effects model 0.1383 [0.0073; 2.6211] -1.32 0.1875
##
## Quantifying heterogeneity:
## tau^2 = NA; tau = NA; I^2 = NA; H = NA
##
## Details on meta-analytical method:
## - Mantel-Haenszel method
## - Inverse variance method
## - Restricted maximum-likelihood estimator for tau^2
## - Continuity correction of 0.5 in studies with zero cell frequencies
```

### 6.14.2 Forest plot

```
forest(structure_metabin,
       sortvar = TE)
```

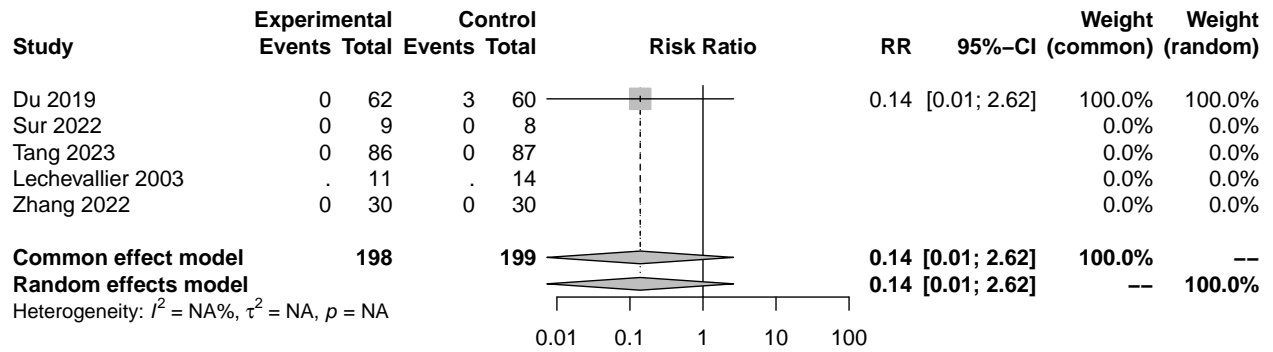

### 6.14.3 Trim and Fill

```
#trimfill(stricture_metabin)  
#forest(trimfill(stricture_metabin),  
#      sortvar = TE)
```

#### 6.14.4 Funnel plot

```
funnel((stricture_metabin))
```

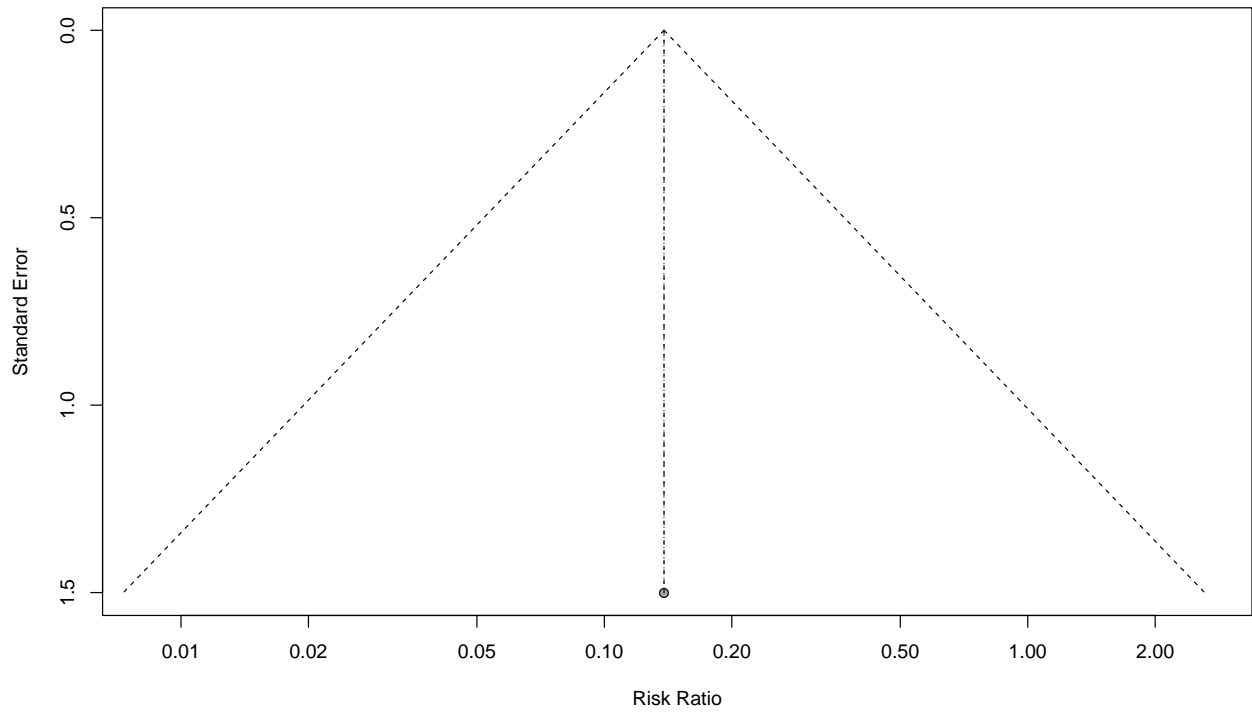

### 6.14.5 Baujat

```
baujat(stricture_metabin, pos = 1)
```

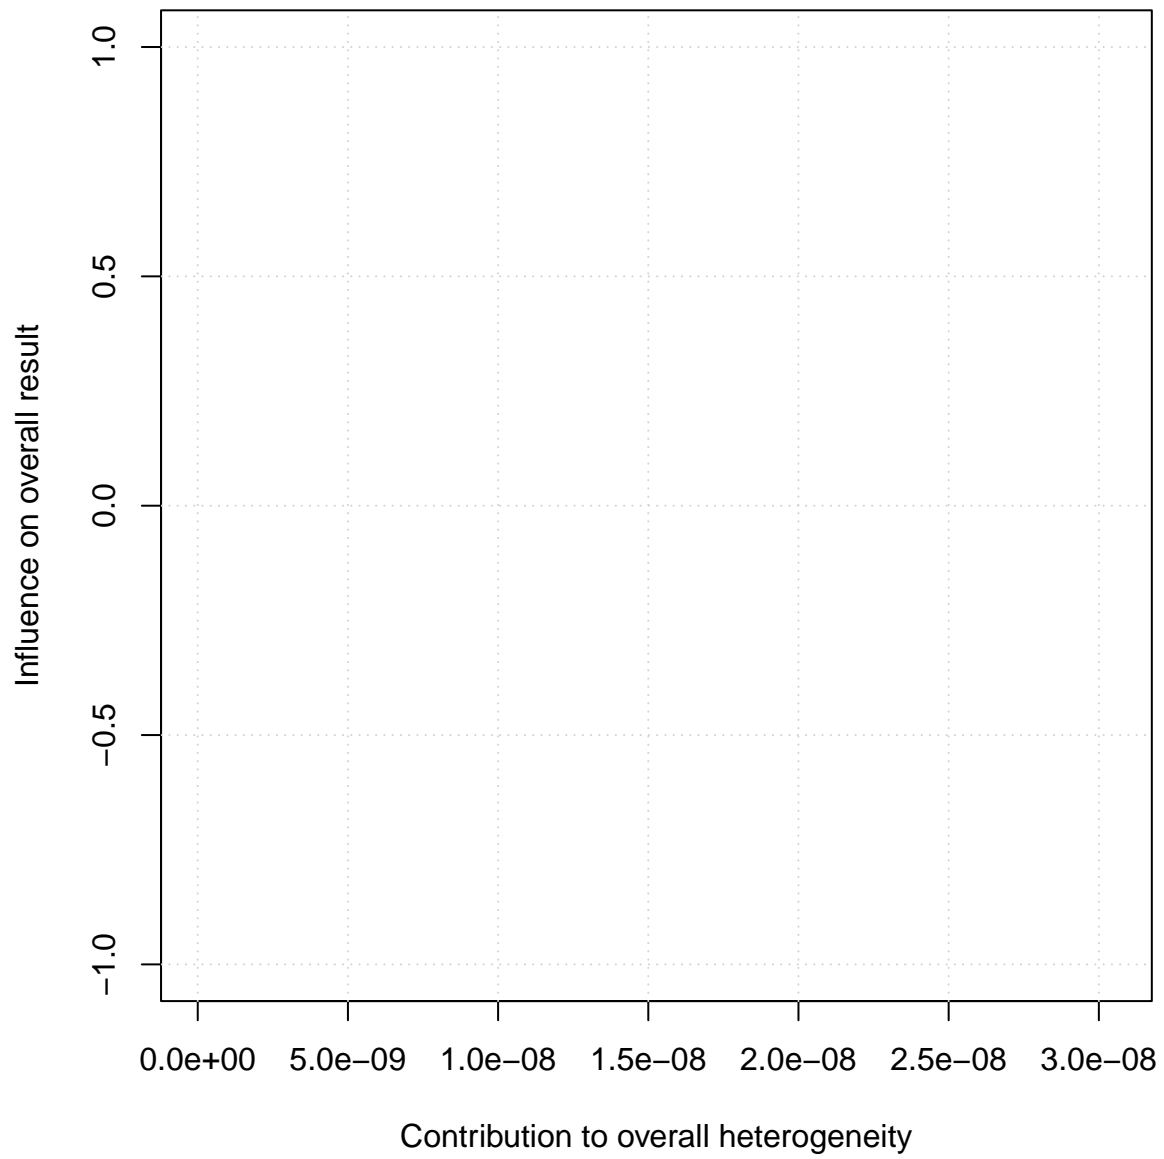

### 6.14.6 Leave one out

```
metainf(stricture_metabin)
```

```
## Influential analysis (common effect model)
##
##
##          RR          95%-CI p-value tau^2 tau I^2
## Omitting Sur 2022      0.1383 [0.0073; 2.6222] 0.1876
## Omitting Tang 2023      0.1383 [0.0073; 2.6222] 0.1876
## Omitting Du 2019
## Omitting Lechevallier 2003 0.1383 [0.0073; 2.6222] 0.1876
## Omitting Zhang 2022      0.1383 [0.0073; 2.6222] 0.1876
##
## Pooled estimate          0.1383 [0.0073; 2.6222] 0.1876
##
## Details on meta-analytical method:
## - Mantel-Haenszel method
## - Restricted maximum-likelihood estimator for tau^2
```

## 6.15 Embolisation required

### 6.15.1 Meta-analysis

```
ir_embolisation_metabin <- metabin(data = rct_only,
                                   event.c = embolism_ir_intervention_n_control,
                                   n.c = sample_size_control,
                                   event.e = embolism_ir_intervention_n_suction,
                                   n.e = sample_size_suction,
                                   studlab = author_year)
ir_embolisation_metabin
```

```
## Number of studies: k = 0
## Number of observations: o = 397
## Number of events: e = 0
##
##                RR 95%-CI  z p-value
## Common effect model  NA      --      --
## Random effects model NA      --      --
##
## Quantifying heterogeneity:
## tau^2 = NA; tau = NA; I^2 = NA; H = NA
##
## Details on meta-analytical method:
## - Mantel-Haenszel method
## - Inverse variance method
## - Restricted maximum-likelihood estimator for tau^2
```

### 6.15.2 Forest plot

```
forest(ir_embolisation_metabin,
       sortvar = TE)
```





### 6.15.3 Trim and Fill

```
#trimfill(ir_embolisation_metabin)  
#forest(trimfill(ir_embolisation_metabin),  
#      sortvar = TE)
```

#### 6.15.4 Funnel plot

```
#funnel((ir_embolisation_metabin))
```

### 6.15.5 Baujat

```
#baujat(ir_embolisation_metabin, pos = 1)
```

### 6.15.6 Leave one out

```
#metainf(ir_embolisation_metabin)
```

## 6.16 Transfusion

### 6.16.1 Meta-analysis

```
transfusion_metabin <- metabin(data = rct_only,
                               event.c = transfusion_n_control,
                               n.c = sample_size_control,
                               event.e = transfusion_n_suction,
                               n.e = sample_size_suction,
                               studlab = author_year)

transfusion_metabin
```

```
## Number of studies: k = 0
## Number of observations: o = 397
## Number of events: e = 0
##
##                RR 95%-CI  z p-value
## Common effect model  NA      --      --
## Random effects model NA      --      --
##
## Quantifying heterogeneity:
## tau^2 = NA; tau = NA; I^2 = NA; H = NA
##
## Details on meta-analytical method:
## - Mantel-Haenszel method
## - Inverse variance method
## - Restricted maximum-likelihood estimator for tau^2
```

### 6.16.2 Forest plot

```
forest(transfusion_metabin,
       sortvar = TE)
```



### 6.16.3 Trim and Fill

```
#trimfill(transfusion_metabin)  
#forest(trimfill(transfusion_metabin),  
#      sortvar = TE)
```

#### 6.16.4 Funnel plot

```
#funnel((transfusion_metabin))
```



### 6.16.5 Baujat

```
#baujat(transfusion_metabin, pos = 1)
```

### 6.16.6 Leave one out

```
#metainf(transfusion_metabin)
```

## 6.17 Clavien I

### 6.17.1 Meta-analysis

```
clav_i_metabin <- metabin(data = rct_only,
                          event.c = clavien_i_n_control,
                          n.c = sample_size_control,
                          event.e = clavien_i_n_suction,
                          n.e = sample_size_suction,
                          studlab = author_year)

clav_i_metabin

## Number of studies: k = 1
## Number of observations: o = 397
## Number of events: e = 1
##
##              RR          95%-CI    z p-value
## Common effect model  2.7000 [0.1252; 58.2391] 0.63 0.5262
## Random effects model  2.6842 [0.1254; 57.4724] 0.63 0.5276
##
## Quantifying heterogeneity:
## tau^2 = NA; tau = NA; I^2 = NA; H = NA
##
## Details on meta-analytical method:
## - Mantel-Haenszel method
## - Inverse variance method
## - Restricted maximum-likelihood estimator for tau^2
## - Continuity correction of 0.5 in studies with zero cell frequencies
```

### 6.17.2 Forest plot

```
forest(clav_i_metabin,
       sortvar = TE)
```

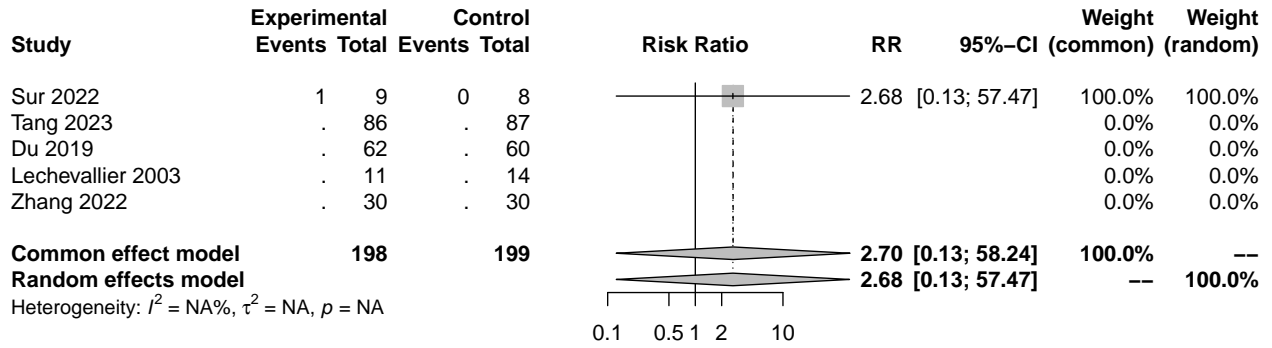

### 6.17.3 Trim and Fill

```
#trimfill(clav_i_metabin)  
#forest(trimfill(clav_i_metabin),  
#      sortvar = TE)
```

### 6.17.4 Funnel plot

```
funnel((clav_i_metabin))
```

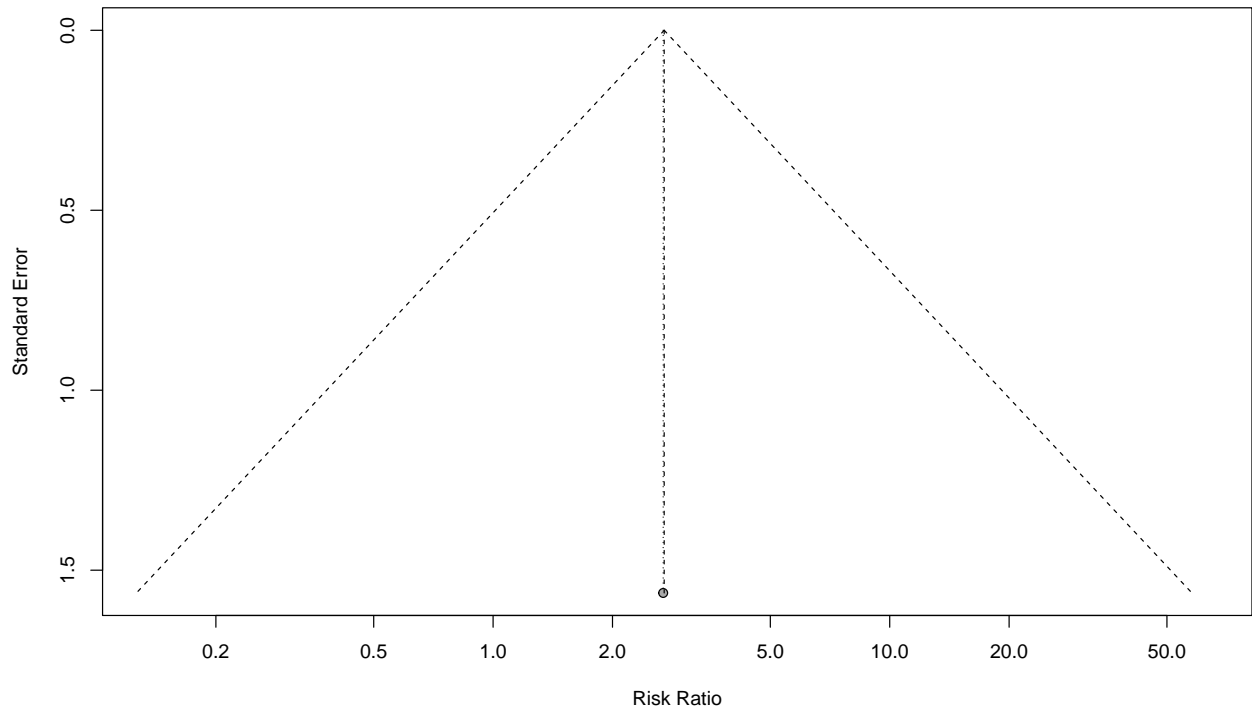

### 6.17.5 Baujat

```
baujat(clav_i_metabin, pos = 1)
```

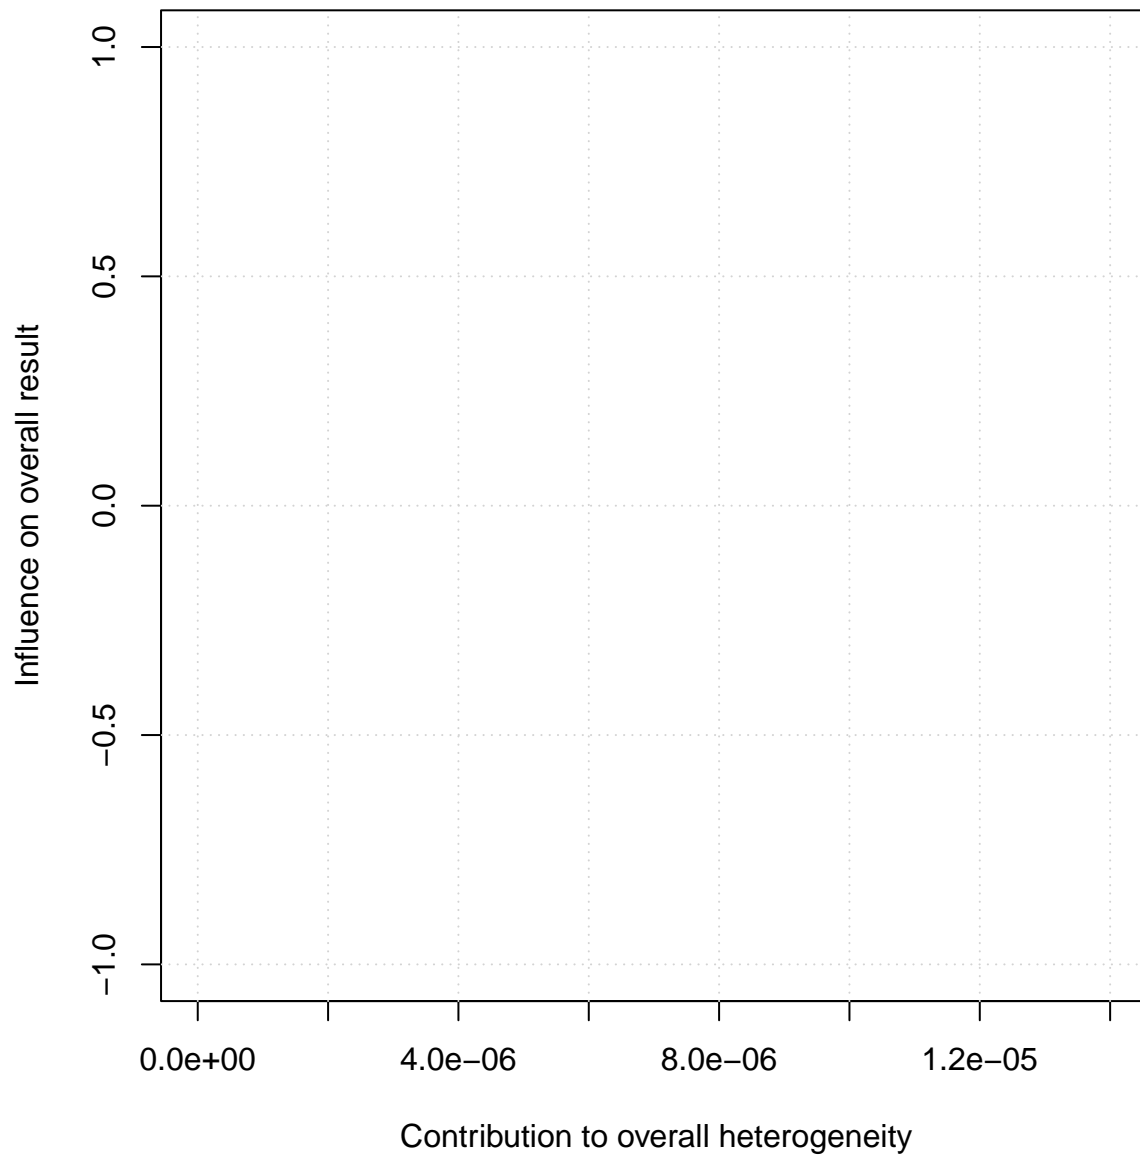

### 6.17.6 Leave one out

```
metainf(clav_i_metabin)
```

```
## Influential analysis (common effect model)
##
##
##          RR          95%-CI p-value tau^2 tau I^2
## Omitting Sur 2022
## Omitting Tang 2023      2.7000 [0.1252; 58.2391] 0.5262
## Omitting Du 2019       2.7000 [0.1252; 58.2391] 0.5262
## Omitting Lechevallier 2003 2.7000 [0.1252; 58.2391] 0.5262
## Omitting Zhang 2022     2.7000 [0.1252; 58.2391] 0.5262
##
## Pooled estimate        2.7000 [0.1252; 58.2391] 0.5262
##
## Details on meta-analytical method:
## - Mantel-Haenszel method
## - Restricted maximum-likelihood estimator for tau^2
```



## 6.18 Clavien II

### 6.18.1 Meta-analysis

```
clav_ii_metabin <- metabin(data = rct_only,
                          event.c = clavien_ii_n_control,
                          n.c = sample_size_control,
                          event.e = clavien_ii_n_suction,
                          n.e = sample_size_suction,
                          studlab = author_year)

clav_ii_metabin

## Number of studies: k = 1
## Number of observations: o = 397
## Number of events: e = 1
##
##              RR          95%-CI      z p-value
## Common effect model 0.3000 [0.0139; 6.4710] -0.77 0.4423
## Random effects model 0.2982 [0.0139; 6.3858] -0.77 0.4390
##
## Quantifying heterogeneity:
## tau^2 = NA; tau = NA; I^2 = NA; H = NA
##
## Details on meta-analytical method:
## - Mantel-Haenszel method
## - Inverse variance method
## - Restricted maximum-likelihood estimator for tau^2
## - Continuity correction of 0.5 in studies with zero cell frequencies
```

### 6.18.2 Forest plot

```
forest(clav_ii_metabin,
       sortvar = TE)
```

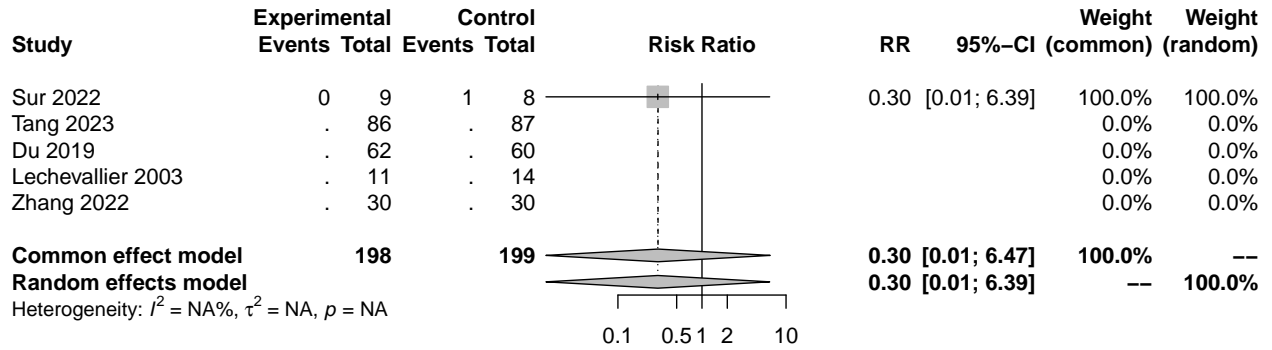

### 6.18.3 Trim and Fill

```
#trimfill(clav_ii_metabin)  
#forest(trimfill(clav_ii_metabin),  
#      sortvar = TE)
```

### 6.18.4 Funnel plot

```
funnel((clav_ii_metabin))
```

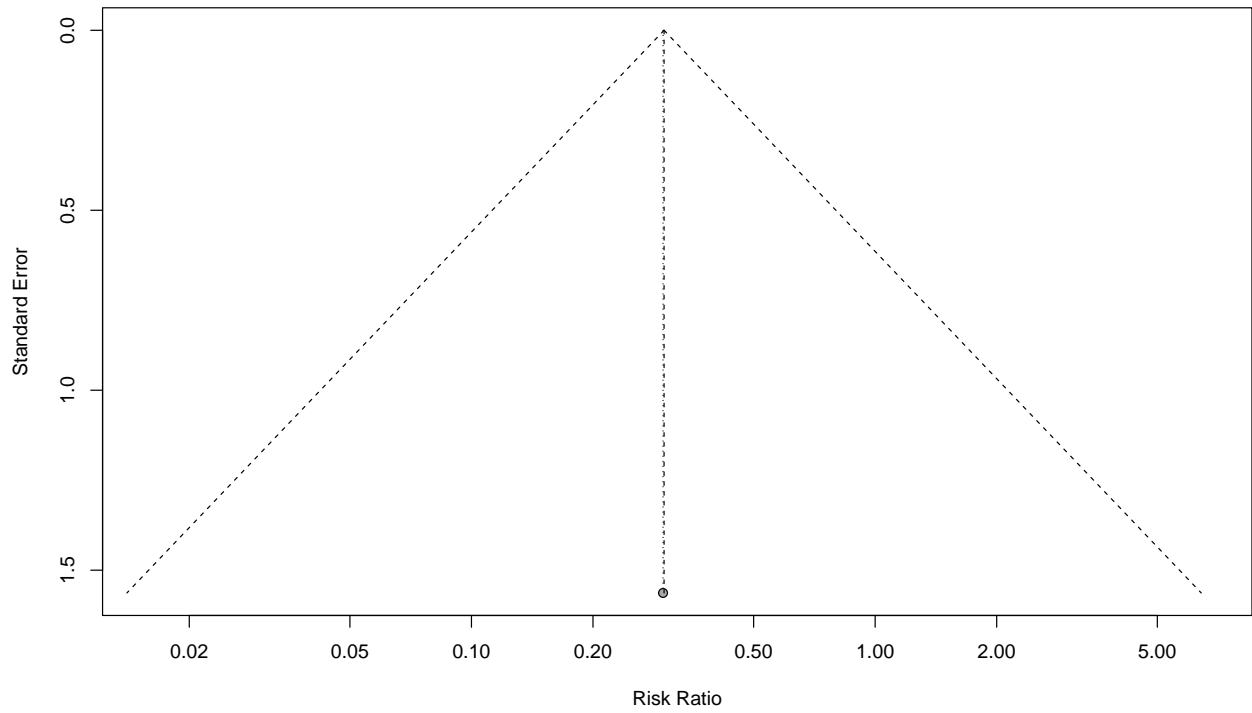

### 6.18.5 Baujat

```
baujat(clav_ii_metabin, pos = 1)
```



### 6.18.6 Leave one out

```
metainf(clav_ii_metabin)
```

```
## Influential analysis (common effect model)
##
##
##          RR          95%-CI p-value tau^2 tau I^2
## Omitting Sur 2022
## Omitting Tang 2023      0.3000 [0.0139; 6.4710] 0.4423
## Omitting Du 2019       0.3000 [0.0139; 6.4710] 0.4423
## Omitting Lechevallier 2003 0.3000 [0.0139; 6.4710] 0.4423
## Omitting Zhang 2022    0.3000 [0.0139; 6.4710] 0.4423
##
## Pooled estimate        0.3000 [0.0139; 6.4710] 0.4423
##
## Details on meta-analytical method:
## - Mantel-Haenszel method
## - Restricted maximum-likelihood estimator for tau^2
```

## 6.19 Clavien III

### 6.19.1 Meta-analysis

```
clav_iii_metabin <- metabin(data = rct_only,
                             event.c = clavien_iii_n_control,
                             n.c = sample_size_control,
                             event.e = clavien_iii_n_suction,
                             n.e = sample_size_suction,
                             studlab = author_year)
```

```
clav_iii_metabin
```

```
## Number of studies: k = 0
## Number of observations: o = 397
## Number of events: e = 0
##
##                RR 95%-CI  z p-value
## Common effect model  NA      --      --
## Random effects model NA      --      --
##
## Quantifying heterogeneity:
## tau^2 = NA; tau = NA; I^2 = NA; H = NA
##
## Details on meta-analytical method:
## - Mantel-Haenszel method
## - Inverse variance method
## - Restricted maximum-likelihood estimator for tau^2
```

### 6.19.2 Forest plot

```
forest(clav_iii_metabin,
       sortvar = TE)
```

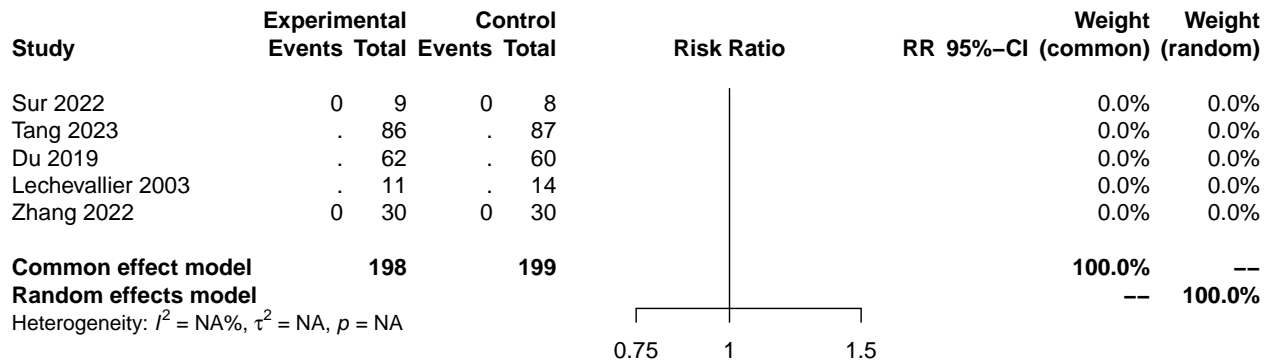



### 6.19.3 Trim and Fill

```
#trimfill(clav_iii_metabin)  
#forest(trimfill(clav_iii_metabin),  
#      sortvar = TE)
```

#### 6.19.4 Funnel plot

```
#funnel((clav_iii_metabin))
```

### 6.19.5 Baujat

```
#baujat(clav_iii_metabin, pos = 1)
```

### 6.19.6 Leave one out

```
#metainf(clav_iii_metabin)
```

## 6.20 Clavien IV

### 6.20.1 Meta-analysis

```
clav_iv_metabin <- metabin(data = rct_only,
                           event.c = clavien_iv_n_control,
                           n.c = sample_size_control,
                           event.e = clavien_iv_n_suction,
                           n.e = sample_size_suction,
                           studlab = author_year)
```

```
clav_iv_metabin
```

```
## Number of studies: k = 0
## Number of observations: o = 397
## Number of events: e = 0
##
##                RR 95%-CI  z p-value
## Common effect model  NA      --      --
## Random effects model NA      --      --
##
## Quantifying heterogeneity:
## tau^2 = NA; tau = NA; I^2 = NA; H = NA
##
## Details on meta-analytical method:
## - Mantel-Haenszel method
## - Inverse variance method
## - Restricted maximum-likelihood estimator for tau^2
```

### 6.20.2 Forest plot

```
forest(clav_iv_metabin,
       sortvar = TE)
```



### 6.20.3 Trim and Fill

```
#trimfill(clav_iv_metabin)  
#forest(trimfill(clav_iv_metabin),  
#      sortvar = TE)
```

#### 6.20.4 Funnel plot

```
#funnel((clav_iv_metabin))
```



### 6.20.5 Baujat

```
#baujat(clav_iv_metabin, pos = 1)
```

### 6.20.6 Leave one out

```
#metainf(clav_iv_metabin)
```

## 6.21 Clavien V

### 6.21.1 Meta-analysis

```
clav_v_metabin <- metabin(data = rct_only,
                          event.c = clavien_v_n_control,
                          n.c = sample_size_control,
                          event.e = clavien_v_n_suction,
                          n.e = sample_size_suction,
                          studlab = author_year)
```

```
clav_v_metabin
```

```
## Number of studies: k = 0
## Number of observations: o = 397
## Number of events: e = 0
##
##                RR 95%-CI  z p-value
## Common effect model  NA      --      --
## Random effects model NA      --      --
##
## Quantifying heterogeneity:
## tau^2 = NA; tau = NA; I^2 = NA; H = NA
##
## Details on meta-analytical method:
## - Mantel-Haenszel method
## - Inverse variance method
## - Restricted maximum-likelihood estimator for tau^2
```

### 6.21.2 Forest plot

```
#forest(clav_v_metabin,  
#       sortvar = TE)
```

### 6.21.3 Trim and Fill

```
#trimfill(clav_v_metabin)  
#forest(trimfill(clav_v_metabin),  
#      sortvar = TE)
```

#### 6.21.4 Funnel plot

```
#funnel(trimfill(clav_v_metabin))
```

### 6.21.5 Baujat

```
#baujat(clav_v_metabin, pos = 1)
```

### 6.21.6 Leave one out

```
#metainf(clav_v_metabin)
```



## 6.22 Clavien I-II

### 6.22.1 Meta-analysis

```
clav_i_ii_metabin <- metabin(data = rct_only,
                             event.c = clav_i_ii_n_control,
                             n.c = sample_size_control,
                             event.e = clav_i_ii_n_suction,
                             n.e = sample_size_suction,
                             studlab = author_year)

clav_i_ii_metabin

## Number of studies: k = 1
## Number of observations: o = 397
## Number of events: e = 2
##
##              RR          95%-CI      z p-value
## Common effect model 0.8889 [0.0658; 12.0044] -0.09 0.9293
## Random effects model 0.8889 [0.0658; 12.0044] -0.09 0.9293
##
## Quantifying heterogeneity:
## tau^2 = NA; tau = NA; I^2 = NA; H = NA
##
## Details on meta-analytical method:
## - Mantel-Haenszel method
## - Inverse variance method
## - Restricted maximum-likelihood estimator for tau^2
```

### 6.22.2 Forest plot

```
forest(clav_i_ii_metabin,
       sortvar = TE)
```

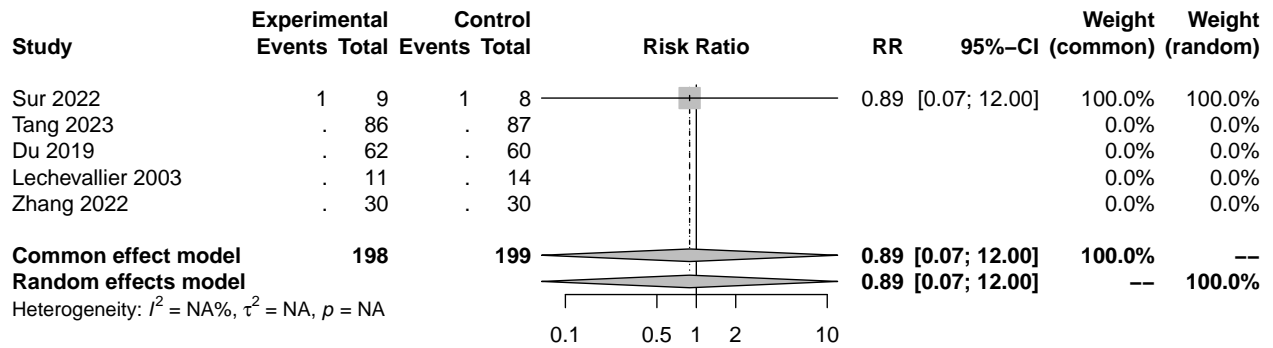

### 6.22.3 Trim and Fill

```
#trimfill(clav_i_ii_metabin)  
#forest(trimfill(clav_i_ii_metabin),  
#      sortvar = TE)
```

#### 6.22.4 Funnel plot

```
#funnel(trimfill(clav_i_ii_metabin))
```

### 6.22.5 Baujat

```
#baujat(clav_i_ii_metabin, pos = 1)
```

### 6.22.6 Leave one out

```
#metainf(clav_i_ii_metabin)
```

## 6.23 Clavien III-V

### 6.23.1 Meta-analysis

```
clav_iii_v_metabin <- metabin(data = rct_only,
                             event.c = clav_iii_v_n_control,
                             n.c = sample_size_control,
                             event.e = clav_iii_v_n_suction,
                             n.e = sample_size_suction,
                             studlab = author_year)
```

```
clav_iii_v_metabin
```

```
## Number of studies: k = 0
## Number of observations: o = 397
## Number of events: e = 0
##
##                RR 95%-CI  z p-value
## Common effect model  NA      --      --
## Random effects model NA      --      --
##
## Quantifying heterogeneity:
## tau^2 = NA; tau = NA; I^2 = NA; H = NA
##
## Details on meta-analytical method:
## - Mantel-Haenszel method
## - Inverse variance method
## - Restricted maximum-likelihood estimator for tau^2
```

### 6.23.2 Forest plot

```
forest(clav_iii_v_metabin,
       sortvar = TE)
```





### 6.23.3 Trim and Fill

```
#trimfill(clav_iii_v_metabin)  
#forest(trimfill(clav_iii_v_metabin),  
#      sortvar = TE)
```

#### 6.23.4 Funnel plot

```
#funnel(trimfill(clav_iii_v_metabin))
```

### 6.23.5 Baujat

```
#baujat(clav_iii_v_metabin, pos = 1)
```

### 6.23.6 Leave one out

```
#metainf(clav_iii_v_metabin)
```



```

    sfr_metabin$k,
    aux_rx_metabin$k,
    comp_metabin$k,
    fever_metabin$k,
    infection_metabin$k,
    sepsis_metabin$k,
    abscess_metabin$k,
    haematoma_metabin$k,
    pain_metabin$k,
    stricture_metabin$k,
    ir_embolisation_metabin$k,
    transfusion_metabin$k,
    clav_i_metabin$k,
    clav_ii_metabin$k,
    clav_iii_metabin$k,
    clav_iv_metabin$k,
    clav_i_ii_metabin$k,
    clav_iii_v_metabin$k,
    or_time_metacont$k,
    vas_metacont$k,
    los_metacont$k),
"es" = c(
  immediate_sfr_metabin$TE.random %>% exp(),
  sfr_metabin$TE.random %>% exp(),
  aux_rx_metabin$TE.random %>% exp(),
  comp_metabin$TE.random %>% exp(),
  fever_metabin$TE.random %>% exp(),
  infection_metabin$TE.random %>% exp(),
  sepsis_metabin$TE.random %>% exp(),
  abscess_metabin$TE.random %>% exp(),
  haematoma_metabin$TE.random %>% exp(),
  pain_metabin$TE.random %>% exp(),
  stricture_metabin$TE.random %>% exp(),
  ir_embolisation_metabin$TE.random %>% exp(),
  transfusion_metabin$TE.random %>% exp(),
  clav_i_metabin$TE.random %>% exp(),
  clav_ii_metabin$TE.random %>% exp(),
  clav_iii_metabin$TE.random %>% exp(),
  clav_iv_metabin$TE.random %>% exp(),
  clav_i_ii_metabin$TE.random %>% exp(),
  clav_iii_v_metabin$TE.random %>% exp(),
  or_time_metacont$TE.random,
  vas_metacont$TE.random,
  los_metacont$TE.random),
"lower_ci" = c(
  immediate_sfr_metabin$lower.random %>% exp(),
  sfr_metabin$lower.random %>% exp(),
  aux_rx_metabin$lower.random %>% exp(),
  comp_metabin$lower.random %>% exp(),
  fever_metabin$lower.random %>% exp(),
  infection_metabin$lower.random %>% exp(),
  sepsis_metabin$lower.random %>% exp(),
  abscess_metabin$lower.random %>% exp(),

```

```

haematoma_metabin$lower.random %>% exp(),
pain_metabin$lower.random %>% exp(),
stricture_metabin$lower.random %>% exp(),
ir_embolisation_metabin$lower.random %>% exp(),
transfusion_metabin$lower.random %>% exp(),
clav_i_metabin$lower.random %>% exp(),
clav_ii_metabin$lower.random %>% exp(),
clav_iii_metabin$lower.random %>% exp(),
clav_iv_metabin$lower.random %>% exp(),
clav_i_ii_metabin$lower.random %>% exp(),
clav_iii_v_metabin$lower.random %>% exp(),
or_time_metacont$lower.random,
vas_metacont$lower.random,
los_metacont$lower.random),
"upper_ci" = c(immediate_sfr_metabin$upper.random %>% exp(),
               sfr_metabin$upper.random %>% exp(),
               aux_rx_metabin$upper.random %>% exp(),
               comp_metabin$upper.random %>% exp(),
               fever_metabin$upper.random %>% exp(),
               infection_metabin$upper.random %>% exp(),
               sepsis_metabin$upper.random %>% exp(),
               abscess_metabin$upper.random %>% exp(),
               haematoma_metabin$upper.random %>% exp(),
               pain_metabin$upper.random %>% exp(),
               stricture_metabin$upper.random %>% exp(),
               ir_embolisation_metabin$upper.random %>% exp(),
               transfusion_metabin$upper.random %>% exp(),
               clav_i_metabin$upper.random %>% exp(),
               clav_ii_metabin$upper.random %>% exp(),
               clav_iii_metabin$upper.random %>% exp(),
               clav_iv_metabin$upper.random %>% exp(),
               clav_i_ii_metabin$upper.random %>% exp(),
               clav_iii_v_metabin$upper.random %>% exp(),
               or_time_metacont$upper.random,
               vas_metacont$upper.random,
               los_metacont$upper.random),
"p" = c(
  immediate_sfr_metabin$pval.random,
  sfr_metabin$pval.random,
  aux_rx_metabin$pval.random,
  comp_metabin$pval.random,
  fever_metabin$pval.random,
  infection_metabin$pval.random,
  sepsis_metabin$pval.random,
  abscess_metabin$pval.random,
  haematoma_metabin$pval.random,
  pain_metabin$pval.random,
  stricture_metabin$pval.random,
  ir_embolisation_metabin$pval.random,
  transfusion_metabin$pval.random,
  clav_i_metabin$pval.random,
  clav_ii_metabin$pval.random,
  clav_iii_metabin$pval.random,

```

```

clav_iv_metabin$pval.random,
clav_i_ii_metabin$pval.random,
clav_iii_v_metabin$pval.random,
or_time_metacont$pval.random,
vas_metacont$pval.random,
los_metacont$pval.random)) %>% as_tibble() %>% drop_na(es)

overall$es <- as.numeric(overall$es)
overall$es <- round(overall$es, digits = 2)

overall$lower_ci <- as.numeric(overall$lower_ci)
overall$lower_ci <- round(overall$lower_ci, digits = 2)

overall$upper_ci <- as.numeric(overall$upper_ci)
overall$upper_ci <- round(overall$upper_ci, digits = 2)

overall$p <- as.numeric(overall$p)
overall$p <- round(overall$p, digits = 2)
overall$p <- ifelse(overall$p<0.001, "<0.001", overall$p)

```



## 7.1 Summary Table of number of studies for each outcome included in meta-analysis

```
overall %>% subset(select = c(Outcome, n_studies)) %>% gt() %>% tab_header(title = "Summary table of Nu
```

Summary table of Number of Studies for Each Outcome Meta-Analysis

| Outcome               | Studies, n |
|-----------------------|------------|
| Immediate SFR         | 9          |
| Final SFR             | 4          |
| Auxiliary Treatment   | 1          |
| Overall Complications | 4          |
| Fever                 | 3          |
| Infection             | 4          |
| Sepsis                | 1          |
| Pain                  | 1          |
| Stricture             | 1          |
| CD I                  | 1          |
| CD II                 | 1          |
| CD I-II               | 1          |
| Operative time        | 5          |
| VAS                   | 1          |
| Length of Stay        | 2          |

## 7.2 Summary Forest plot of Continuous outcomes

### 7.2.1 Continuous Outcomes Table

md = mean difference lb = lower bound of 95% confidence interval ub = upper bound of 95% confidence interval tf = trim and fill

```
overall_continuous <-  
  overall %>% subset(type == "cont") %>% subset(select = c(Outcome,  
                                                         n_studies,  
                                                         es,  
                                                         lower_ci,  
                                                         upper_ci,  
                                                         p)) %>% as_tibble()  
overall_continuous %>% gt() %>% tab_header(title = "Summary Table for Continuous Outcomes") %>% cols_me
```

Summary Table for Continuous Outcomes

| Outcome        | Studies, n | MD (95% CI)         | p    |
|----------------|------------|---------------------|------|
| Operative time | 5          | -6.87 (-18.71-4.96) | 0.25 |
| VAS            | 1          | -0.34 (-0.65-0.03)  | 0.03 |
| Length of Stay | 2          | -0.48 (-1.27-0.30)  | 0.23 |

## 7.2.2 Continuous Forest plot

```

continuous_plot <- overall_continuous %>%
  forestplot(
    mean = es,
    lower = lower_ci,
    upper = upper_ci,
    labeltext = c(Outcome, n_studies, es, lower_ci, upper_ci, p),
    zero = 0,
    vertices = TRUE,
    title = "A. Forest plot of MA Outcomes for Continuous Outcomes",
    clip = c(-4, 2),
    xlab = "MD [95% CI]",
    graph.pos = 3
  ) %>% fp_set_style(
    box = c("black"),
    line = "black",
    txt_gp = fpTxtGp(
      ticks = gpar(fontfamily = "", cex = 1),
      xlab = gpar(fontfamily = "", cex = 1)
    )
  ) %>% fp_add_lines("steelblue") %>%
  fp_add_header("Outcome",
    "Studies, n",
    "MD",
    "[ 95%", " CI ]",
    "P-Value") %>% fp_decorate_graph(box = TRUE) %>% fp_set_zebra_style("#EFEFEF")
continuous_plot

```

**A. Forest plot of MA Outcomes for Continuous Outcomes**

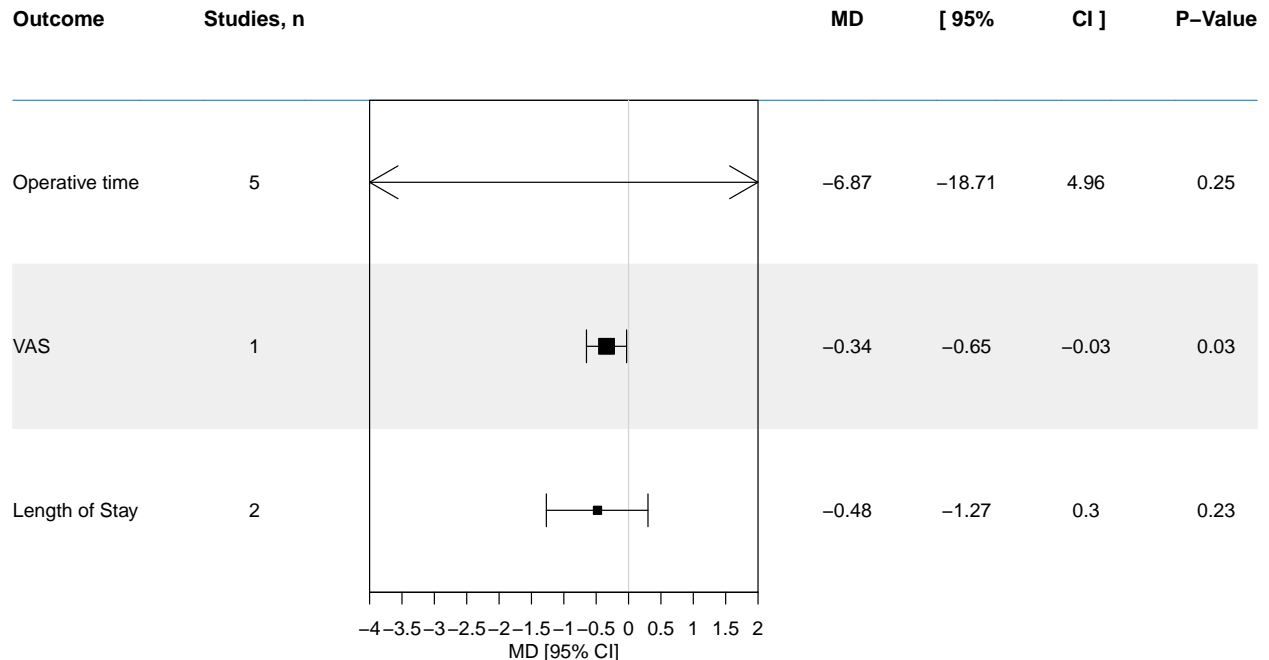

### 7.3 Summary Forest plot of Binary outcomes

### 7.3.1 Binary Outcomes Table

md = mean difference lb = lower bound of 95% confidence interval ub = upper bound of 95% confidence interval tf = trim and fill

```
overall_binary <-  
  overall %>% subset(type == "binary") %>% subset(select = c(Outcome,  
                                                             n_studies,  
                                                             es,  
                                                             lower_ci,  
                                                             upper_ci,  
                                                             p)) %>% as_tibble()  
overall_binary %>% gt() %>% tab_header(title = "Summary Table for Binary Outcomes") %>% cols_merge(colum
```

Summary Table for Binary Outcomes

| Outcome               | Studies, n | RR (95% CI)       | p      |
|-----------------------|------------|-------------------|--------|
| Immediate SFR         | 9          | 1.15 (0.99-1.34)  | 0.08   |
| Final SFR             | 4          | 1.13 (0.98-1.29)  | 0.09   |
| Auxiliary Treatment   | 1          | 0.06 (0.00-1.11)  | 0.06   |
| Overall Complications | 4          | 0.20 (0.09-0.41)  | <0.001 |
| Fever                 | 3          | 0.22 (0.07-0.63)  | <0.001 |
| Infection             | 4          | 0.22 (0.08-0.61)  | <0.001 |
| Sepsis                | 1          | 0.11 (0.01-2.06)  | 0.14   |
| Pain                  | 1          | 0.16 (0.04-0.67)  | 0.01   |
| Stricture             | 1          | 0.14 (0.01-2.62)  | 0.19   |
| CD I                  | 1          | 2.68 (0.13-57.47) | 0.53   |
| CD II                 | 1          | 0.30 (0.01-6.39)  | 0.44   |
| CD I-II               | 1          | 0.89 (0.07-12.00) | 0.93   |

### 7.3.2 Binary Forest plot - Meta-Analysis

Reference = No Suction

```
binary_plot <- overall_binary %>%
  forestplot(
    mean = es,
    lower = lower_ci,
    upper = upper_ci,
    labeltext = c(Outcome, n_studies, es, lower_ci, upper_ci, p),
    zero = 1,
    vertices = TRUE,
    title = "A. Forest plot of MA Outcomes for Binary Outcomes",
    clip = c(-1.5, 1.5),
    xlab = "RR [95% CI]",
    graph.pos = 3
  ) %>% fp_set_style(
    box = c("black"),
    line = "black",
    txt_gp = fpTxtGp(
      ticks = gpar(fontfamily = "", cex = 1),
      xlab = gpar(fontfamily = "", cex = 1)
    )
  ) %>% fp_add_lines("steelblue") %>%
  fp_add_header("Outcome",
    "Studies, n",
    "RR",
    "[ 95%", " CI ]",
    "P-Value") %>% fp_decorate_graph(box = TRUE) %>% fp_set_zebra_style("#EFEFEF")
binary_plot
```

A. Forest plot of MA Outcomes for Binary Outcomes

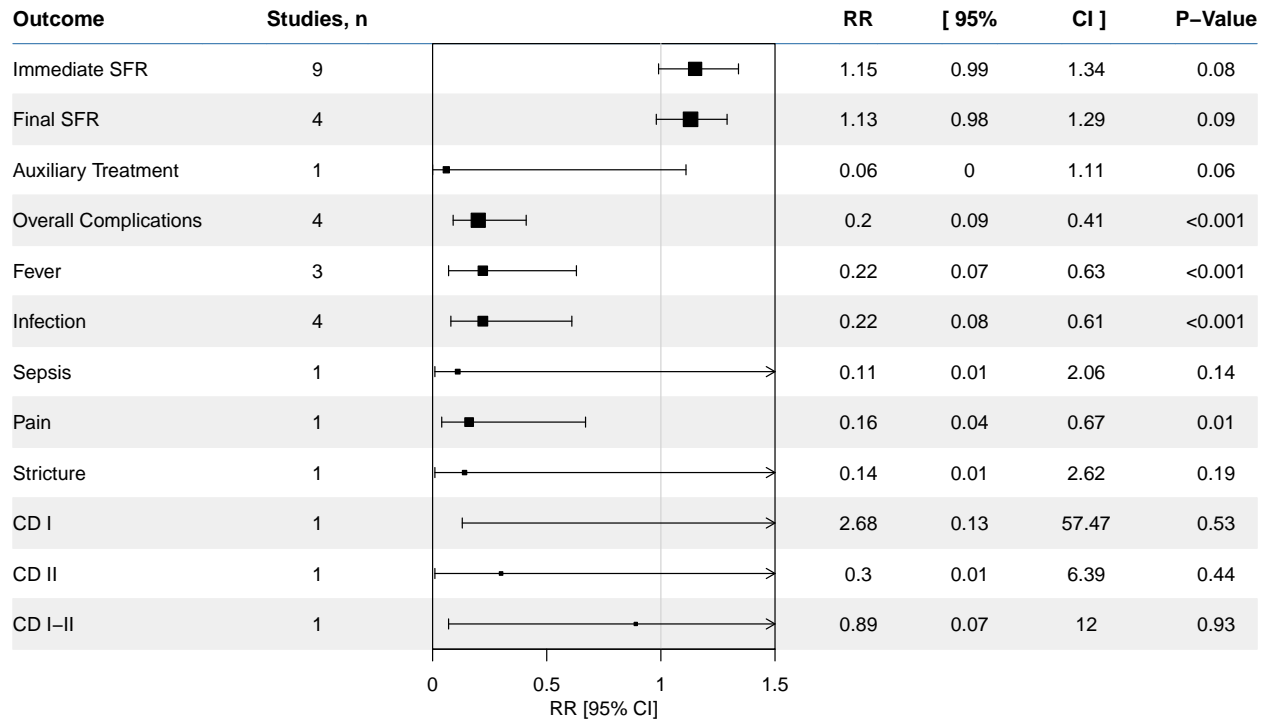

## 8 Semi-rigid Only Meta-Analysis Outcomes

```
semirigid_only <- suction_data %>% subset(control_group == "Semi-rigid URS")
```

## 8.1 Immediate SFR

### 8.1.1 Meta-analysis

```
immediate_sfr_metabin <- metabin(data = suction_data,
                                event.c = sfr_immediate_n_control,
                                n.c = sample_size_control,
                                event.e = sfr_immediate_n_suction,
                                n.e = sample_size_suction,
                                studlab = author_year)

immediate_sfr_metabin

## Number of studies: k = 9
## Number of observations: o = 2311
## Number of events: e = 979
##
##              RR          95%-CI    z  p-value
## Common effect model  1.1581 [1.0834; 1.2380] 4.31 < 0.0001
## Random effects model  1.1478 [0.9854; 1.3370] 1.77  0.0765
##
## Quantifying heterogeneity:
## tau^2 = 0.0365 [0.0088; 0.2318]; tau = 0.1910 [0.0939; 0.4814]
## I^2 = 74.6% [50.9%; 86.9%]; H = 1.99 [1.43; 2.76]
##
## Test of heterogeneity:
##      Q d.f. p-value
## 31.55  8 0.0001
##
## Details on meta-analytical method:
## - Mantel-Haenszel method
## - Inverse variance method
## - Restricted maximum-likelihood estimator for tau^2
## - Q-Profile method for confidence interval of tau^2 and tau
```



### 8.1.2 Forest plot

```
forest(immediate_sfr_metabin,
       sortvar = TE)
```

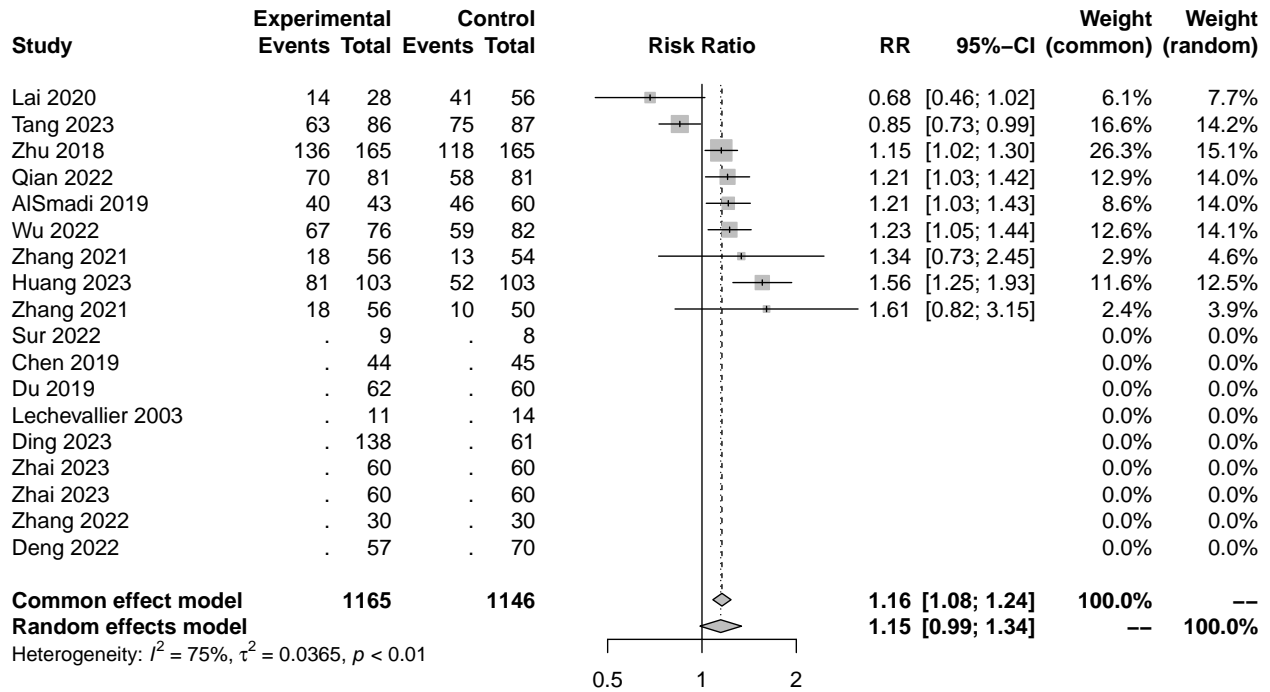

### 8.1.3 Trim and Fill

```
trimfill(immediate_sfr_metabin)
```

```
## Warning in trimfill.meta(immediate_sfr_metabin): 9 observation(s) dropped due
## to missing values

## Number of studies: k = 11 (with 2 added studies)
## Number of observations: o = 1744
## Number of events: e = 1140
##
##                RR          95%-CI    z p-value
## Random effects model 1.0855 [0.9289; 1.2685] 1.03 0.3019
##
## Quantifying heterogeneity:
## tau^2 = 0.0471 [0.0138; 0.2196]; tau = 0.2170 [0.1173; 0.4686]
## I^2 = 76.9% [58.8%; 87.1%]; H = 2.08 [1.56; 2.78]
##
## Test of heterogeneity:
##      Q d.f.  p-value
## 43.33  10 < 0.0001
##
## Details on meta-analytical method:
## - Inverse variance method
## - Restricted maximum-likelihood estimator for tau^2
## - Q-Profile method for confidence interval of tau^2 and tau
## - Trim-and-fill method to adjust for funnel plot asymmetry (L-estimator)
```

```
forest(trimfill(immediate_sfr_metabin),
        sortvar = TE)
```

```
## Warning in trimfill.meta(immediate_sfr_metabin): 9 observation(s) dropped due
## to missing values
```



Heterogeneity:  $I^2 = 77\%$ ,  $\tau^2 = 0.0471$ ,  $p < 0.01$

### 8.1.4 Funnel plot

```
funnel(trimfill(immediate_sfr_metabin))
```

```
## Warning in trimfill.meta(immediate_sfr_metabin): 9 observation(s) dropped due  
## to missing values
```

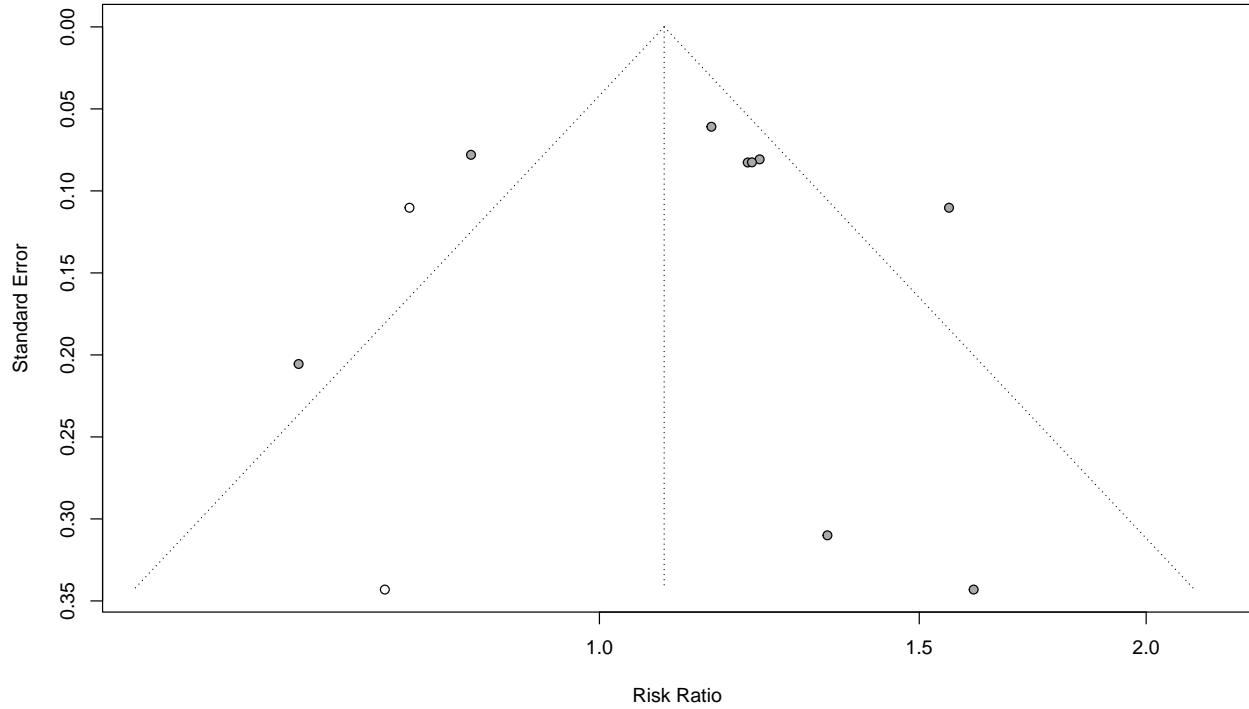

### 8.1.5 Baujat

```
baujat(immediate_sfr_metabin, pos = 1)
```



### 8.1.6 Leave one out

```
metainf(immediate_sfr_metabin)
```

```
## Influential analysis (common effect model)
##
##
##          RR          95%-CI  p-value  tau^2    tau
## Omitting Sur 2022      1.1581 [1.0834; 1.2380] < 0.0001  0.0365  0.1910
## Omitting Tang 2023      1.2195 [1.1329; 1.3128] < 0.0001  0.0076  0.0873
## Omitting Chen 2019      1.1581 [1.0834; 1.2380] < 0.0001  0.0365  0.1910
## Omitting Du 2019        1.1581 [1.0834; 1.2380] < 0.0001  0.0365  0.1910
## Omitting Lai 2020       1.1889 [1.1116; 1.2716] < 0.0001  0.0258  0.1607
## Omitting Zhu 2018       1.1601 [1.0710; 1.2565]  0.0003  0.0482  0.2196
## Omitting Zhang 2021     1.1473 [1.0741; 1.2254] < 0.0001  0.0376  0.1938
## Omitting Zhang 2021     1.1527 [1.0791; 1.2313] < 0.0001  0.0396  0.1990
## Omitting Lechevallier 2003 1.1581 [1.0834; 1.2380] < 0.0001  0.0365  0.1910
## Omitting Huang 2023     1.1057 [1.0315; 1.1853]  0.0046  0.0246  0.1568
## Omitting Wu 2022        1.1484 [1.0676; 1.2353]  0.0002  0.0464  0.2153
## Omitting Ding 2023      1.1581 [1.0834; 1.2380] < 0.0001  0.0365  0.1910
## Omitting Zhai 2023      1.1581 [1.0834; 1.2380] < 0.0001  0.0365  0.1910
## Omitting Zhai 2023      1.1581 [1.0834; 1.2380] < 0.0001  0.0365  0.1910
## Omitting Qian 2022      1.1508 [1.0700; 1.2377]  0.0002  0.0468  0.2164
## Omitting Zhang 2022     1.1581 [1.0834; 1.2380] < 0.0001  0.0365  0.1910
## Omitting Deng 2022     1.1581 [1.0834; 1.2380] < 0.0001  0.0365  0.1910
## Omitting AlSmadi 2019   1.1529 [1.0734; 1.2383] < 0.0001  0.0467  0.2160
##
## Pooled estimate        1.1581 [1.0834; 1.2380] < 0.0001  0.0365  0.1910
##
##          I^2
## Omitting Sur 2022      74.6%
## Omitting Tang 2023     51.5%
## Omitting Chen 2019     74.6%
## Omitting Du 2019       74.6%
## Omitting Lai 2020      72.2%
## Omitting Zhu 2018      77.8%
## Omitting Zhang 2021    77.1%
## Omitting Zhang 2021    77.6%
## Omitting Lechevallier 2003 74.6%
## Omitting Huang 2023    69.4%
## Omitting Wu 2022       77.2%
## Omitting Ding 2023     74.6%
## Omitting Zhai 2023     74.6%
## Omitting Zhai 2023     74.6%
## Omitting Qian 2022     77.4%
## Omitting Zhang 2022    74.6%
## Omitting Deng 2022    74.6%
## Omitting AlSmadi 2019  77.4%
##
## Pooled estimate        74.6%
##
## Details on meta-analytical method:
## - Mantel-Haenszel method
## - Restricted maximum-likelihood estimator for tau^2
```

## 8.2 Final SFR

### 8.2.1 Meta-analysis

```
sfr_metabin <- metabin(data = semirigid_only,
                      event.c = sfr_final_n_control,
                      n.c = sample_size_control,
                      event.e = sfr_final_n_suction,
                      n.e = sample_size_suction,
                      studlab = author_year)

sfr_metabin

## Number of studies: k = 6
## Number of observations: o = 754
## Number of events: e = 653
##
##              RR          95%-CI    z p-value
## Common effect model 1.1622 [1.1042; 1.2233] 5.75 < 0.0001
## Random effects model 1.1577 [1.0743; 1.2476] 3.84 0.0001
##
## Quantifying heterogeneity:
## tau^2 = 0.0046 [0.0000; 0.0380]; tau = 0.0679 [0.0000; 0.1949]
## I^2 = 57.3% [0.0%; 82.7%]; H = 1.53 [1.00; 2.41]
##
## Test of heterogeneity:
##      Q d.f. p-value
## 11.70  5 0.0391
##
## Details on meta-analytical method:
## - Mantel-Haenszel method
## - Inverse variance method
## - Restricted maximum-likelihood estimator for tau^2
## - Q-Profile method for confidence interval of tau^2 and tau
## - Continuity correction of 0.5 in studies with zero cell frequencies
```

## 8.2.2 Forest plot

```
forest(sfr_metabin,
       sortvar = TE)
```

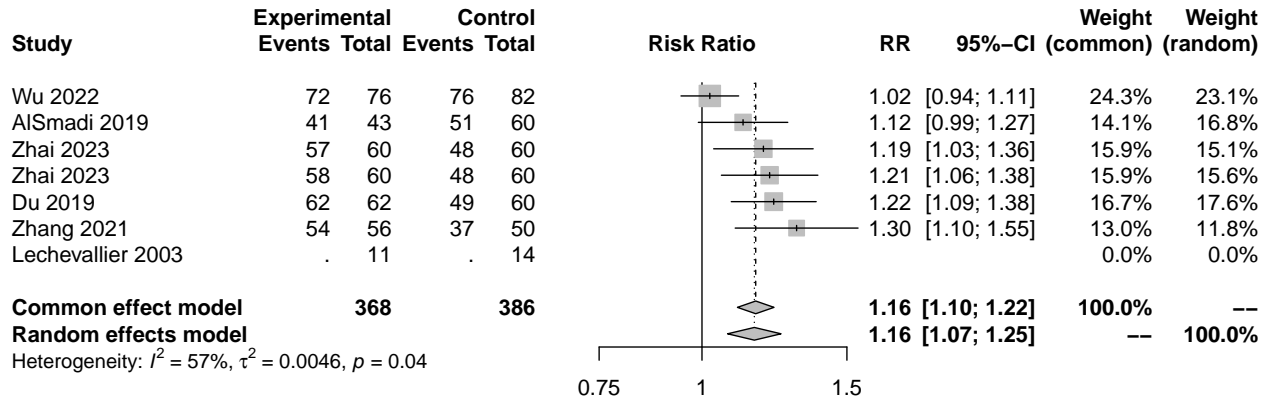

### 8.2.3 Trim and Fill

```
trimfill(sfr_metabin)
```

```
## Warning in trimfill.meta(sfr_metabin): 1 observation(s) dropped due to missing
## values

## Number of studies: k = 9 (with 3 added studies)
## Number of observations: o = 1077
## Number of events: e = 961
##
##                      RR          95%-CI    z p-value
## Random effects model 1.0848 [0.9981; 1.1791] 1.91 0.0555
##
## Quantifying heterogeneity:
## tau^2 = 0.0117 [0.0029; 0.0615]; tau = 0.1081 [0.0538; 0.2480]
## I^2 = 71.6% [43.9%; 85.6%]; H = 1.88 [1.34; 2.63]
##
## Test of heterogeneity:
##      Q d.f. p-value
## 28.14  8 0.0004
##
## Details on meta-analytical method:
## - Inverse variance method
## - Restricted maximum-likelihood estimator for tau^2
## - Q-Profile method for confidence interval of tau^2 and tau
## - Trim-and-fill method to adjust for funnel plot asymmetry (L-estimator)
```

```
forest(trimfill(sfr_metabin),
        sortvar = TE)
```

```
## Warning in trimfill.meta(sfr_metabin): 1 observation(s) dropped due to missing
## values
```

| Study                       | Experiment |           | Control    |            | Risk Ratio | RR          | 95%-CI              | Weight        |
|-----------------------------|------------|-----------|------------|------------|------------|-------------|---------------------|---------------|
|                             | logRR      | SE(logRR) | Total      | Total      |            |             |                     |               |
| Filled: Zhang 2021          | -0.1193    | 0.0877    | 56         | 50         |            | 0.89        | [0.75; 1.05]        | 9.3%          |
| Filled: Du 2019             | -0.0552    | 0.0606    | 62         | 60         |            | 0.95        | [0.84; 1.07]        | 11.8%         |
| Filled: Zhai 2023           | -0.0438    | 0.0689    | 60         | 60         |            | 0.96        | [0.84; 1.10]        | 11.0%         |
| Wu 2022                     | 0.0219     | 0.0412    | 76         | 82         |            | 1.02        | [0.94; 1.11]        | 13.5%         |
| AlSmadi 2019                | 0.1149     | 0.0638    | 43         | 60         |            | 1.12        | [0.99; 1.27]        | 11.5%         |
| Zhai 2023                   | 0.1719     | 0.0710    | 60         | 60         |            | 1.19        | [1.03; 1.36]        | 10.8%         |
| Zhai 2023                   | 0.1892     | 0.0689    | 60         | 60         |            | 1.21        | [1.06; 1.38]        | 11.0%         |
| Du 2019                     | 0.2007     | 0.0606    | 62         | 60         |            | 1.22        | [1.09; 1.38]        | 11.8%         |
| Zhang 2021                  | 0.2647     | 0.0877    | 56         | 50         |            | 1.30        | [1.10; 1.55]        | 9.3%          |
| <b>Random effects model</b> |            |           | <b>535</b> | <b>542</b> |            | <b>1.08</b> | <b>[1.00; 1.18]</b> | <b>100.0%</b> |

Heterogeneity:  $I^2 = 72\%$ ,  $\tau^2 = 0.0117$ ,  $p < 0.01$



## 8.2.4 Funnel plot

```
funnel(trimfill(sfr_metabin))
```

```
## Warning in trimfill.meta(sfr_metabin): 1 observation(s) dropped due to missing  
## values
```

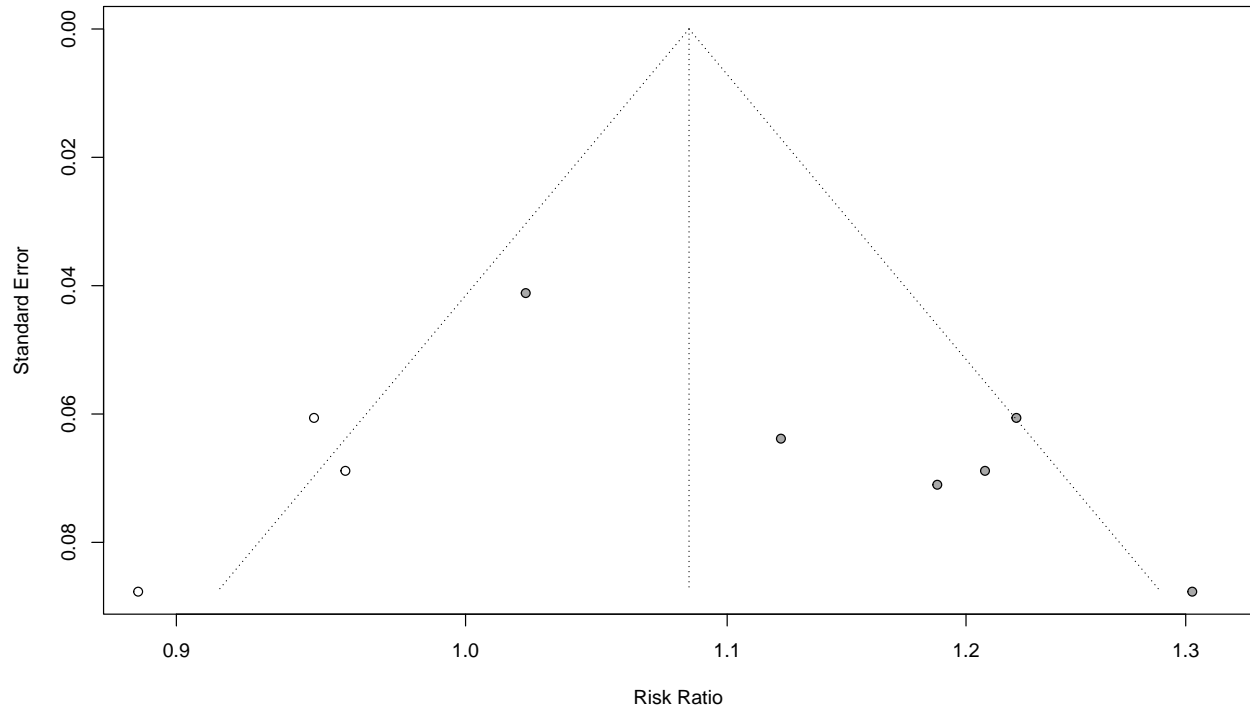

### 8.2.5 Baujat

```
baujat(sfr_metabin, pos = 1)
```

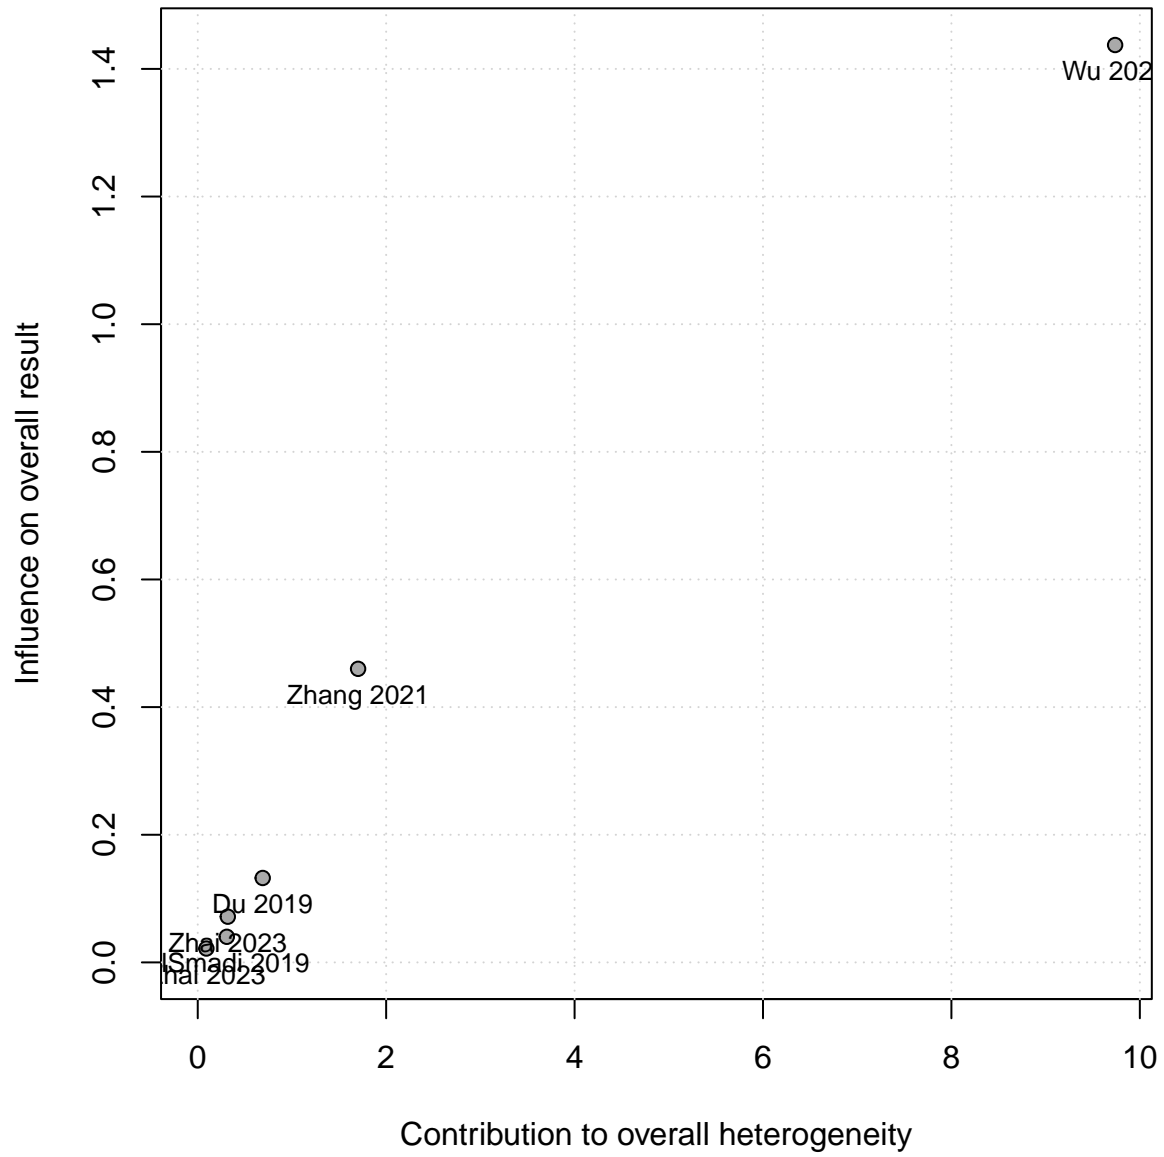

## 8.2.6 Leave one out

```
metainf(sfr_metabin)
```

```
## Influential analysis (common effect model)
##
##              RR          95%-CI  p-value  tau^2    tau
## Omitting Du 2019      1.1501 [1.0871; 1.2168] < 0.0001  0.0052  0.0723
## Omitting Zhang 2021   1.1412 [1.0826; 1.2030] < 0.0001  0.0040  0.0629
## Omitting Lechevallier 2003 1.1622 [1.1042; 1.2233] < 0.0001  0.0046  0.0679
## Omitting Wu 2022      1.2072 [1.1346; 1.2844] < 0.0001  0.0000  0.0000
## Omitting Zhai 2023    1.1535 [1.0914; 1.2191] < 0.0001  0.0056  0.0747
## Omitting Zhai 2023    1.1574 [1.0956; 1.2228] < 0.0001  0.0059  0.0768
## Omitting AlSmadi 2019  1.1689 [1.1053; 1.2362] < 0.0001  0.0062  0.0788
##
## Pooled estimate      1.1622 [1.1042; 1.2233] < 0.0001  0.0046  0.0679
##
##              I^2
## Omitting Du 2019      59.1%
## Omitting Zhang 2021   55.1%
## Omitting Lechevallier 2003 57.3%
## Omitting Wu 2022      0.0%
## Omitting Zhai 2023    62.5%
## Omitting Zhai 2023    64.2%
## Omitting AlSmadi 2019  65.7%
##
## Pooled estimate      57.3%
##
## Details on meta-analytical method:
## - Mantel-Haenszel method
## - Restricted maximum-likelihood estimator for tau^2
```

## 8.3 OR time

### 8.3.1 Meta-analysis

```
or_time_metacont <- metacont(data = semirigid_only,
                             mean.c = or_time_min_mean_control,
                             sd.c = or_time_min_sd_control,
                             mean.e = or_time_min_mean_suction,
                             sd.e = or_time_min_sd_suction,
                             n.e = sample_size_suction,
                             n.c = sample_size_control,
                             studlab = author_year)

or_time_metacont

## Number of studies: k = 7
## Number of observations: o = 754
##
##              MD              95%-CI      z  p-value
## Common effect model -8.2542 [ -9.4297; -7.0788] -13.76 < 0.0001
## Random effects model -6.8657 [-14.0651;  0.3336]  -1.87  0.0616
##
## Quantifying heterogeneity:
## tau^2 = 86.2668 [31.6285; 469.1099]; tau = 9.2880 [5.6239; 21.6589]
## I^2 = 95.8% [93.4%; 97.4%]; H = 4.89 [3.89; 6.15]
##
## Test of heterogeneity:
##      Q d.f.  p-value
## 143.67   6 < 0.0001
##
## Details on meta-analytical method:
## - Inverse variance method
## - Restricted maximum-likelihood estimator for tau^2
## - Q-Profile method for confidence interval of tau^2 and tau
```

### 8.3.2 Forest plot

```
forest(or_time_metacont,
       sortvar = TE)
```

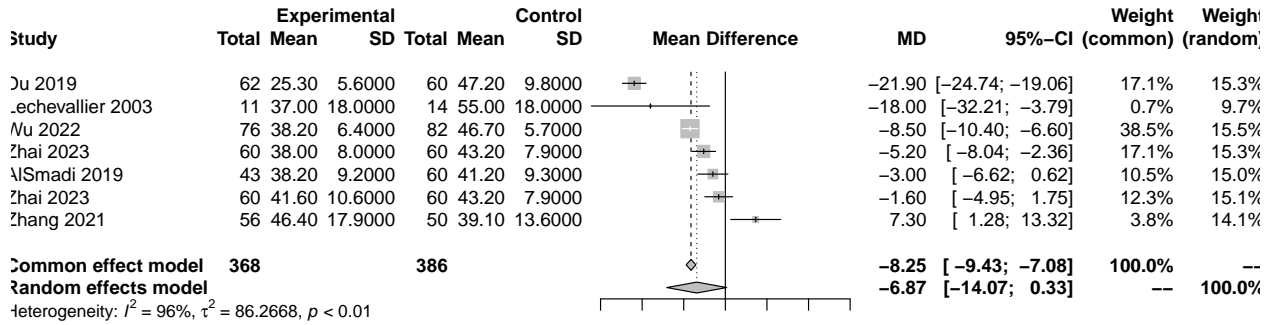

### 8.3.3 Trim and Fill

```
trimfill(or_time_metacont)
```

```
## Number of studies: k = 8 (with 1 added studies)
## Number of observations: o = 860
##
##
##          MD          95%-CI      z p-value
## Random effects model -9.1790 [-16.8799; -1.4781] -2.34 0.0195
##
## Quantifying heterogeneity:
## tau^2 = 114.8028 [45.5270; 506.6692]; tau = 10.7146 [6.7474; 22.5093]
## I^2 = 95.9% [93.8%; 97.3%]; H = 4.96 [4.02; 6.12]
##
## Test of heterogeneity:
##      Q d.f.  p-value
## 172.49   7 < 0.0001
##
## Details on meta-analytical method:
## - Inverse variance method
## - Restricted maximum-likelihood estimator for tau^2
## - Q-Profile method for confidence interval of tau^2 and tau
## - Trim-and-fill method to adjust for funnel plot asymmetry (L-estimator)
forest(trimfill(or_time_metacont),
        sortvar = TE)
```

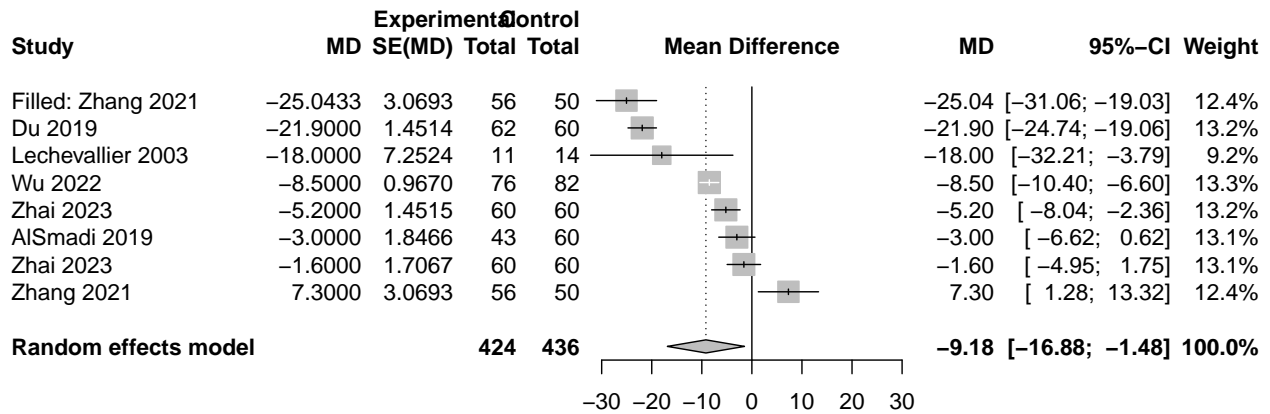

### 8.3.4 Funnel plot

```
funnel(trimfill(or_time_metacont))
```

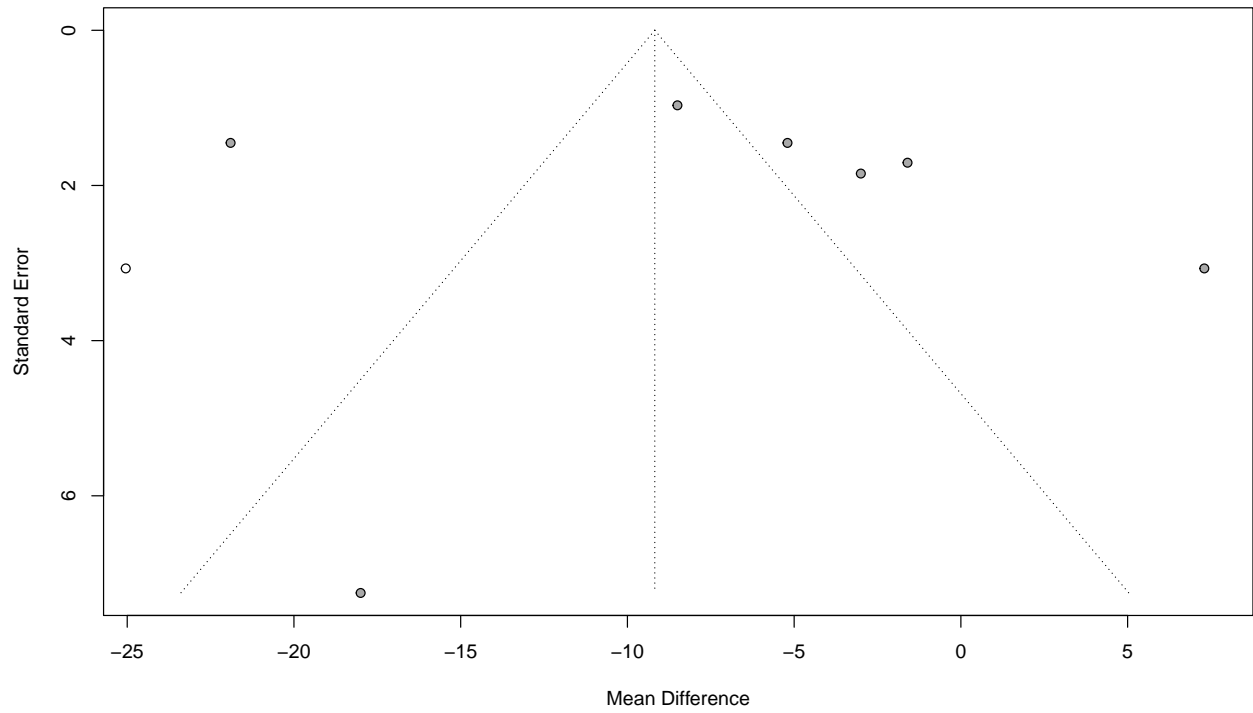

### 8.3.5 Baujat

```
baujat(or_time_metacont, pos = 1)
```

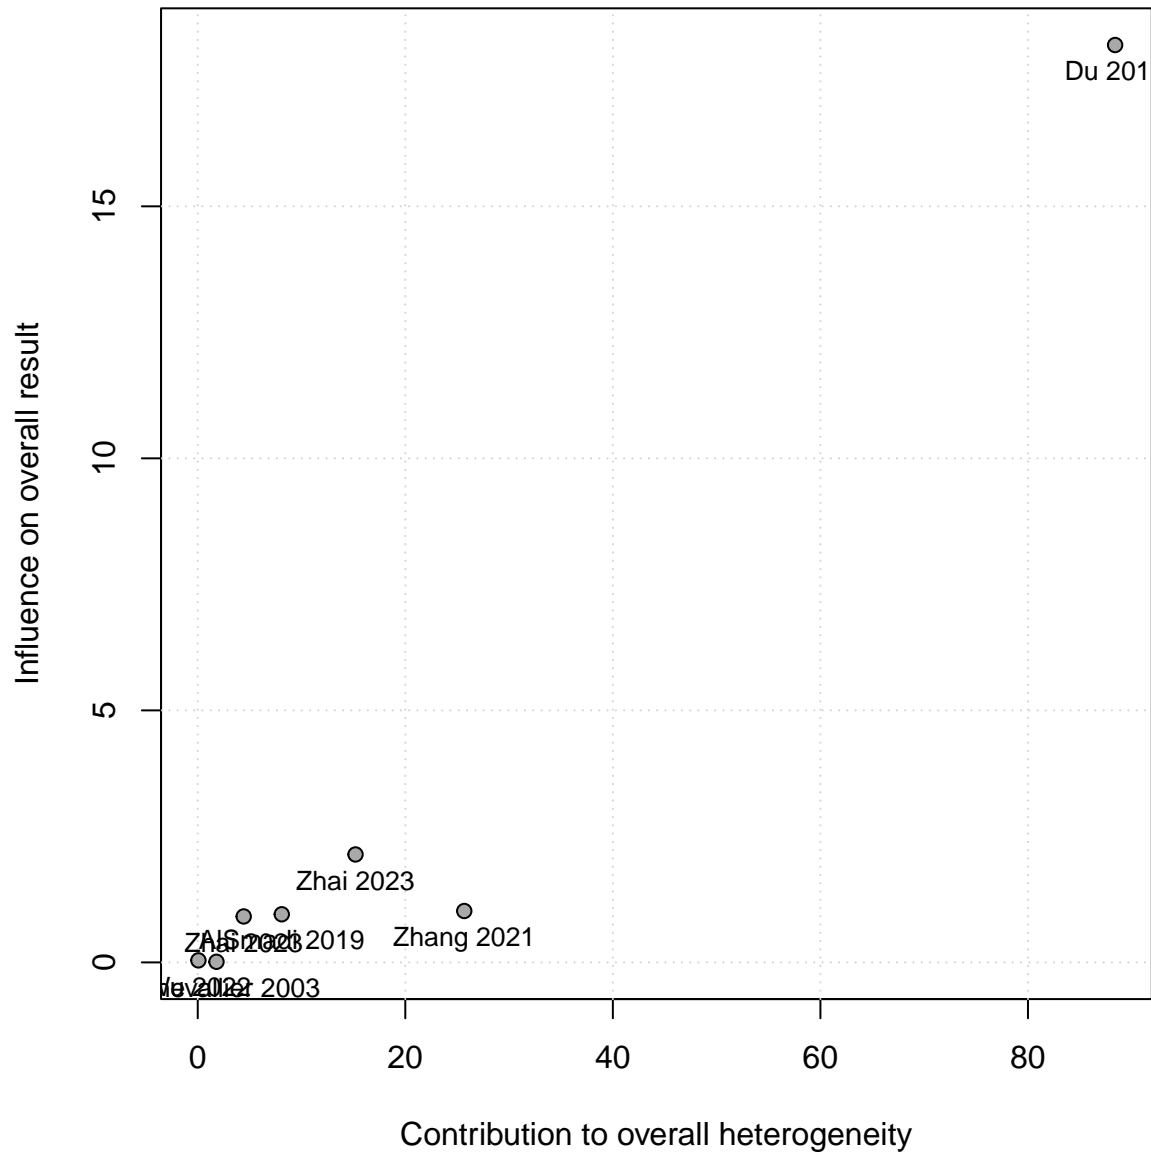



### 8.3.6 Leave one out

```
metainf(or_time_metacont)
```

```
## Influential analysis (common effect model)
##
##           MD           95%-CI p-value   tau^2
## Omitting Du 2019      -5.4447 [-6.7355; -4.1539] < 0.0001  32.4249
## Omitting Zhang 2021  -8.8716 [-10.0701; -7.6731] < 0.0001  62.0728
## Omitting Lechevallier 2003 -8.1871 [-9.3666; -7.0077] < 0.0001  86.9262
## Omitting Wu 2022     -8.1007 [-9.5990; -6.6023] < 0.0001 106.0931
## Omitting Zhai 2023   -9.1916 [-10.4471; -7.9361] < 0.0001  99.7092
## Omitting Zhai 2023   -8.8830 [-10.1737; -7.5922] < 0.0001 106.1781
## Omitting AlSmadi 2019 -8.8738 [-10.1166; -7.6310] < 0.0001 102.9498
##
## Pooled estimate      -8.2542 [-9.4297; -7.0788] < 0.0001  86.2668
##           tau       I^2
## Omitting Du 2019      5.6943  86.5%
## Omitting Zhang 2021   7.8786  95.7%
## Omitting Lechevallier 2003 9.3234  96.5%
## Omitting Wu 2022     10.3002  96.5%
## Omitting Zhai 2023    9.9854  96.0%
## Omitting Zhai 2023    10.3043  96.4%
## Omitting AlSmadi 2019 10.1464  96.3%
##
## Pooled estimate      9.2880  95.8%
##
## Details on meta-analytical method:
## - Inverse variance method
## - Restricted maximum-likelihood estimator for tau^2
```

## 8.4 Auxiliary Treatments

### 8.4.1 Meta-analysis

```
aux_rx_metabin <- metabin(data = semirigid_only,
                          event.c = auxillary_tx_n_control,
                          n.c = sample_size_control,
                          event.e = auxillary_tx_n_suction,
                          n.e = sample_size_suction,
                          studlab = author_year)

aux_rx_metabin

## Number of studies: k = 5
## Number of observations: o = 754
## Number of events: e = 64
##
##              RR          95%-CI      z p-value
## Common effect model 0.5418 [0.3260; 0.9006] -2.36 0.0181
## Random effects model 0.5696 [0.1350; 2.4033] -0.77 0.4435
##
## Quantifying heterogeneity:
## tau^2 = 1.9745 [0.2816; 24.2153]; tau = 1.4052 [0.5306; 4.9209]
## I^2 = 75.7% [40.5%; 90.1%]; H = 2.03 [1.30; 3.18]
##
## Test of heterogeneity:
##      Q d.f. p-value
## 16.49  4 0.0024
##
## Details on meta-analytical method:
## - Mantel-Haenszel method
## - Inverse variance method
## - Restricted maximum-likelihood estimator for tau^2
## - Q-Profile method for confidence interval of tau^2 and tau
## - Continuity correction of 0.5 in studies with zero cell frequencies
```

### 8.4.2 Forest plot

```
forest(aux_rx_metabin,
       sortvar = TE)
```

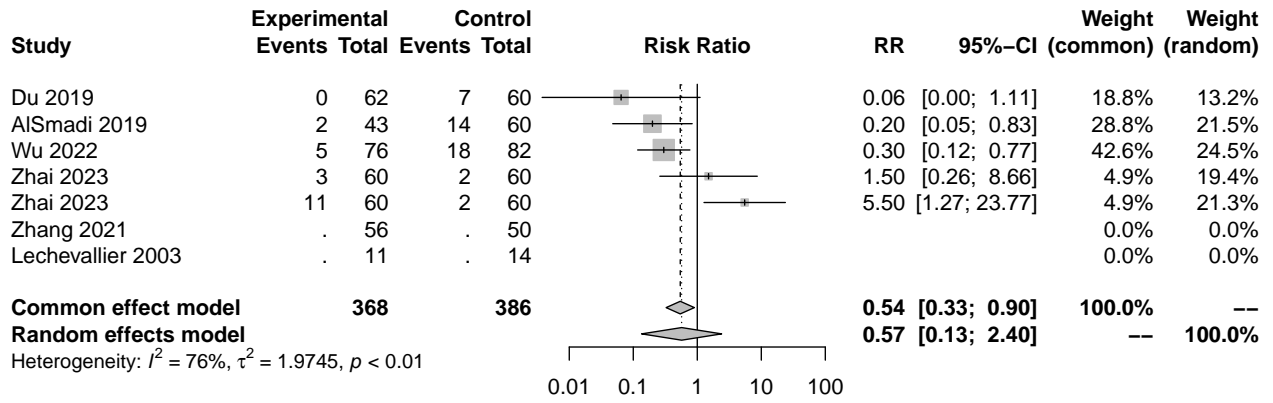

### 8.4.3 Trim and Fill

```
trimfill(aux_rx_metabin)
```

```
## Warning in trimfill.meta(aux_rx_metabin): 2 observation(s) dropped due to
## missing values

## Number of studies: k = 5 (with 0 added studies)
## Number of observations: o = 623
## Number of events: e = 64
##
##                      RR          95%-CI      z p-value
## Random effects model 0.5696 [0.1350; 2.4033] -0.77  0.4435
##
## Quantifying heterogeneity:
## tau^2 = 1.9745 [0.2816; 24.2153]; tau = 1.4052 [0.5306; 4.9209]
## I^2 = 75.7% [40.5%; 90.1%]; H = 2.03 [1.30; 3.18]
##
## Test of heterogeneity:
##      Q d.f. p-value
## 16.49   4  0.0024
##
## Details on meta-analytical method:
## - Inverse variance method
## - Restricted maximum-likelihood estimator for tau^2
## - Q-Profile method for confidence interval of tau^2 and tau
## - Trim-and-fill method to adjust for funnel plot asymmetry (L-estimator)
```

```
forest(trimfill(aux_rx_metabin),
        sortvar = TE)
```

```
## Warning in trimfill.meta(aux_rx_metabin): 2 observation(s) dropped due to
## missing values
```

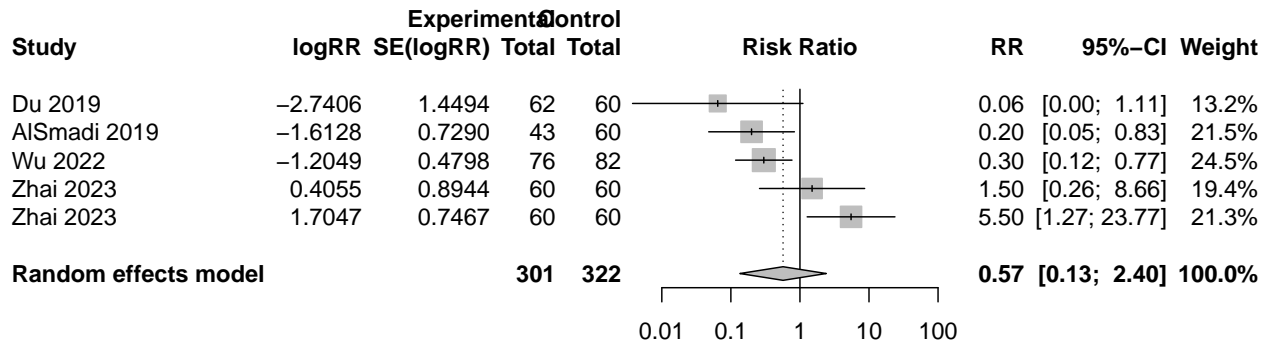

#### 8.4.4 Funnel plot

```
funnel(trimfill(aux_rx_metabin))
```

```
## Warning in trimfill.meta(aux_rx_metabin): 2 observation(s) dropped due to  
## missing values
```

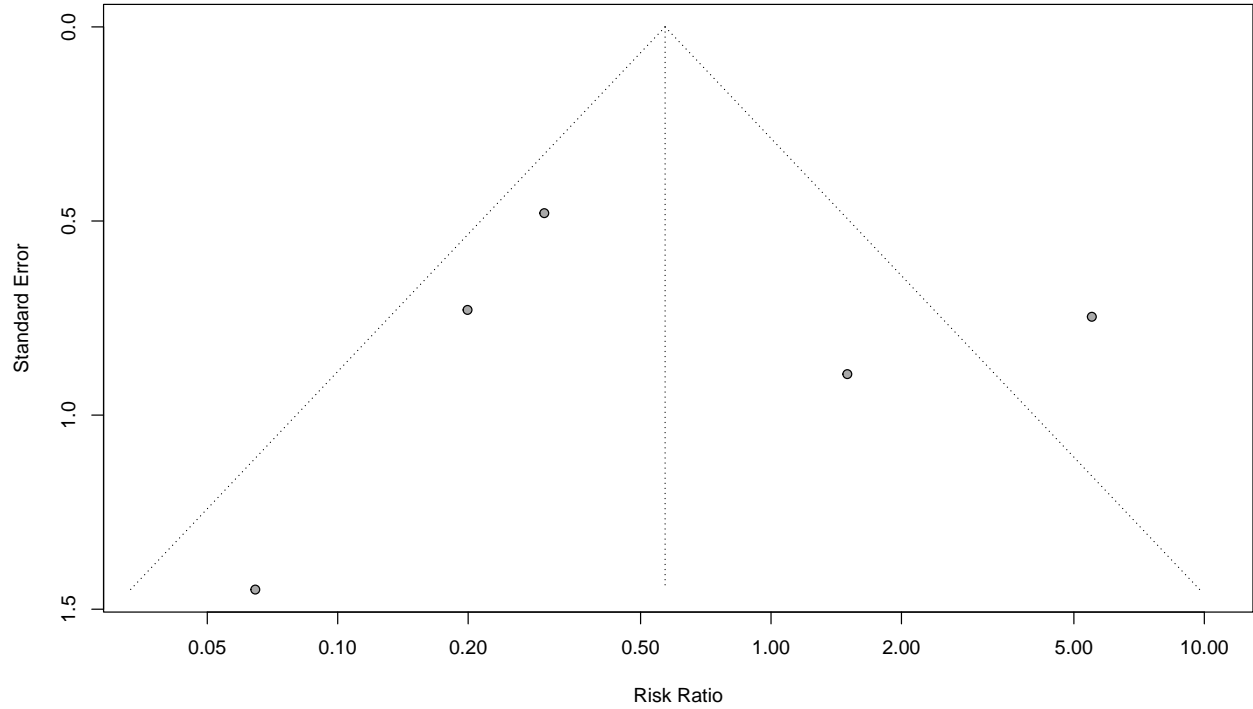

### 8.4.5 Baujat

```
baujat(aux_rx_metabin, pos = 1)
```

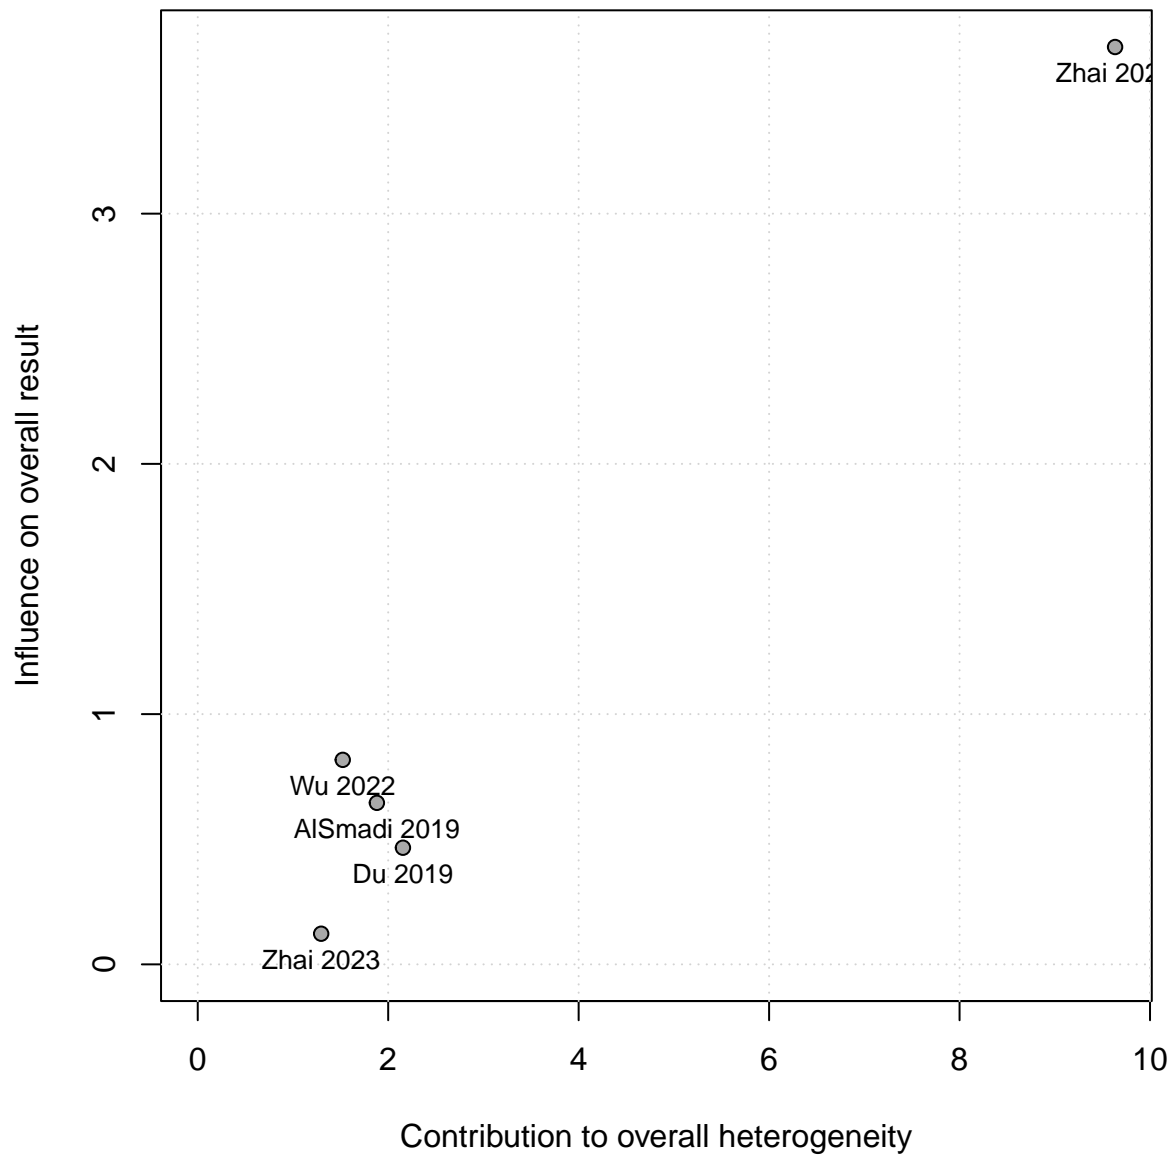

### 8.4.6 Leave one out

```
metainf(aux_rx_metabin)
```

```
## Influential analysis (common effect model)
##
##           RR           95%-CI p-value   tau^2   tau
## Omitting Du 2019      0.6520 [0.3832; 1.1094] 0.1147 1.8370 1.3554
## Omitting Zhang 2021   0.5418 [0.3260; 0.9006] 0.0181 1.9745 1.4052
## Omitting Lechevallier 2003 0.5418 [0.3260; 0.9006] 0.0181 1.9745 1.4052
## Omitting Wu 2022      0.7217 [0.3877; 1.3434] 0.3036 2.7940 1.6715
## Omitting Zhai 2023    0.2851 [0.1477; 0.5501] 0.0002 0.1125 0.3354
## Omitting Zhai 2023    0.4922 [0.2874; 0.8428] 0.0098 2.5861 1.6081
## Omitting AlSmadi 2019 0.6802 [0.3905; 1.1845] 0.1733 2.3649 1.5378
##
## Pooled estimate      0.5418 [0.3260; 0.9006] 0.0181 1.9745 1.4052
##           I^2
## Omitting Du 2019      78.9%
## Omitting Zhang 2021   75.7%
## Omitting Lechevallier 2003 75.7%
## Omitting Wu 2022      78.2%
## Omitting Zhai 2023    35.4%
## Omitting Zhai 2023    80.0%
## Omitting AlSmadi 2019 78.8%
##
## Pooled estimate      75.7%
##
## Details on meta-analytical method:
## - Mantel-Haenszel method
## - Restricted maximum-likelihood estimator for tau^2
```

## 8.5 VAS

### 8.5.1 Meta-analysis

```
vas_metacont <- metacont(data = semirigid_only,
                        mean.c = vas_score_mean_control,
                        sd.c = vas_score_sd_control,
                        mean.e = vas_score_mean_suction,
                        sd.e = vas_score_sd_suction,
                        n.e = sample_size_suction,
                        n.c = sample_size_control,
                        studlab = author_year)
```

```
vas_metacont
```

```
## Number of studies: k = 0
## Number of observations: o = 754
##
##           MD 95%-CI  z p-value
## Common effect model NA    --    --
## Random effects model NA    --    --
##
## Quantifying heterogeneity:
## tau^2 = NA; tau = NA; I^2 = NA; H = NA
##
## Details on meta-analytical method:
## - Inverse variance method
## - Restricted maximum-likelihood estimator for tau^2
```



### 8.5.2 Forest plot

```
forest(vas_metacont,
       sortvar = TE)
```

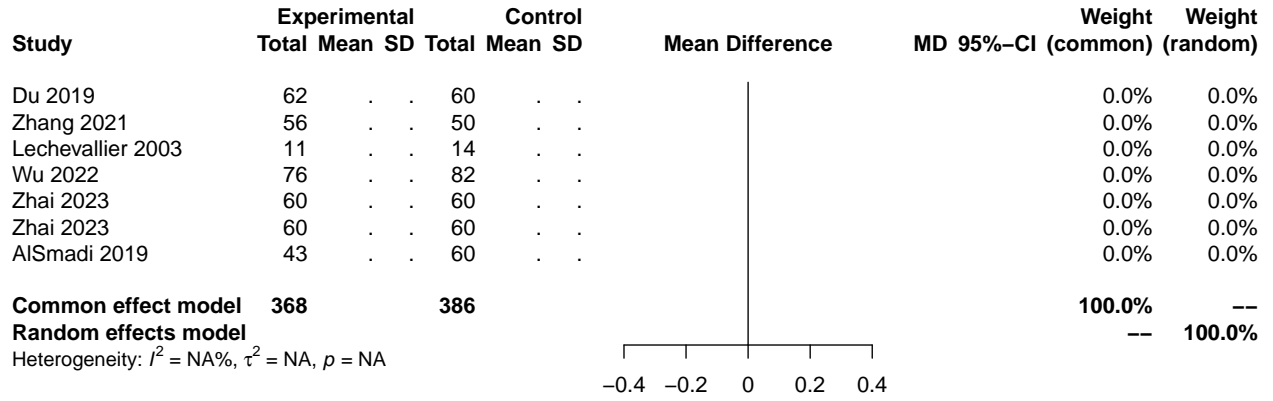

### 8.5.3 Trim and Fill

```
#trimfill(vas_metacont)  
#forest(trimfill(vas_metacont))
```

#### 8.5.4 Funnel plot

```
#funnel((vas_metacont))
```

### 8.5.5 Baujat

```
#baujat(vas_metacont, pos = 1)
```

### 8.5.6 Leave one out

```
metainf(vas_metacont)
```

```
## Influential analysis (common effect model)
##
## MD 95%-CI p-value tau^2 tau I^2
## Omitting Du 2019
## Omitting Zhang 2021
## Omitting Lechevallier 2003
## Omitting Wu 2022
## Omitting Zhai 2023
## Omitting Zhai 2023
## Omitting AlSmadi 2019
##
## Pooled estimate
##
## Details on meta-analytical method:
## - Inverse variance method
## - Restricted maximum-likelihood estimator for tau^2
```

## 8.6 LoS

### 8.6.1 Meta-analysis

```
los_metacont <- metacont(data = semirigid_only,
  mean.c = los_days_mean_control,
  sd.c = los_days_sd_control,
  mean.e = los_days_mean_suction,
  sd.e = los_days_sd_suction,
  n.e = sample_size_suction,
  n.c = sample_size_control,
  studlab = author_year)

los_metacont

## Number of studies: k = 4
## Number of observations: o = 754
##
##              MD              95%-CI      z  p-value
## Common effect model -0.3002 [-0.3902; -0.2102] -6.54 < 0.0001
## Random effects model -0.2916 [-0.5517; -0.0316] -2.20  0.0280
##
## Quantifying heterogeneity:
## tau^2 = 0.0406 [0.0000; 1.2883]; tau = 0.2015 [0.0000; 1.1350]
## I^2 = 54.6% [0.0%; 85.0%]; H = 1.48 [1.00; 2.58]
##
## Test of heterogeneity:
##      Q d.f. p-value
## 6.61   3 0.0854
##
## Details on meta-analytical method:
## - Inverse variance method
## - Restricted maximum-likelihood estimator for tau^2
## - Q-Profile method for confidence interval of tau^2 and tau
```

### 8.6.2 Forest plot

```
forest(los_metacont,
       sortvar = TE)
```

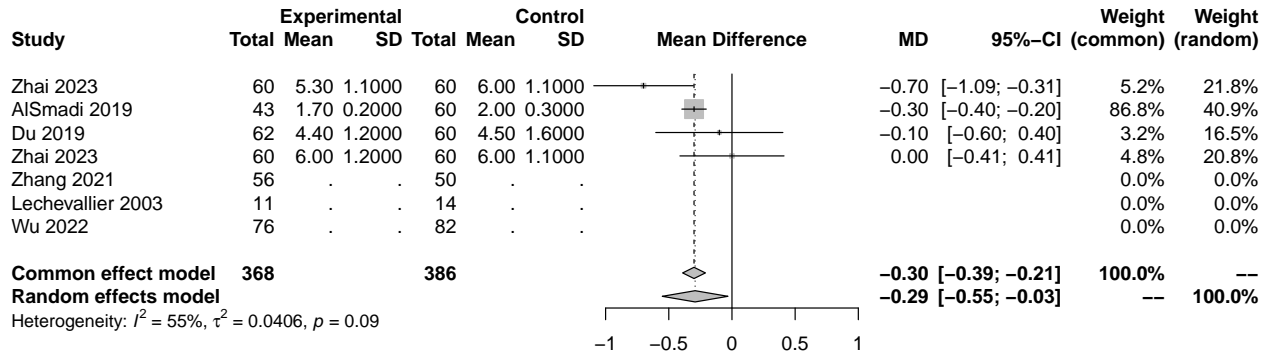

### 8.6.3 Trim and Fill

```
trimfill(los_metacont)
```

```
## Warning in trimfill.meta(los_metacont): 3 observation(s) dropped due to missing
## values
```

```
## Number of studies: k = 5 (with 1 added studies)
```

```
## Number of observations: o = 585
```

```
##
```

```
##           MD           95%-CI      z p-value
```

```
## Random effects model -0.3500 [-0.5882; -0.1118] -2.88  0.0040
```

```
##
```

```
## Quantifying heterogeneity:
```

```
## tau^2 = 0.0414 [0.0000; 0.7562]; tau = 0.2035 [0.0000; 0.8696]
```

```
## I^2 = 55.4% [0.0%; 83.5%]; H = 1.50 [1.00; 2.46]
```

```
##
```

```
## Test of heterogeneity:
```

```
##      Q d.f. p-value
```

```
##  8.97   4  0.0619
```

```
##
```

```
## Details on meta-analytical method:
```

```
## - Inverse variance method
```

```
## - Restricted maximum-likelihood estimator for tau^2
```

```
## - Q-Profile method for confidence interval of tau^2 and tau
```

```
## - Trim-and-fill method to adjust for funnel plot asymmetry (L-estimator)
```

```
forest(trimfill(los_metacont),
        sortvar = TE)
```

```
## Warning in trimfill.meta(los_metacont): 3 observation(s) dropped due to missing
## values
```

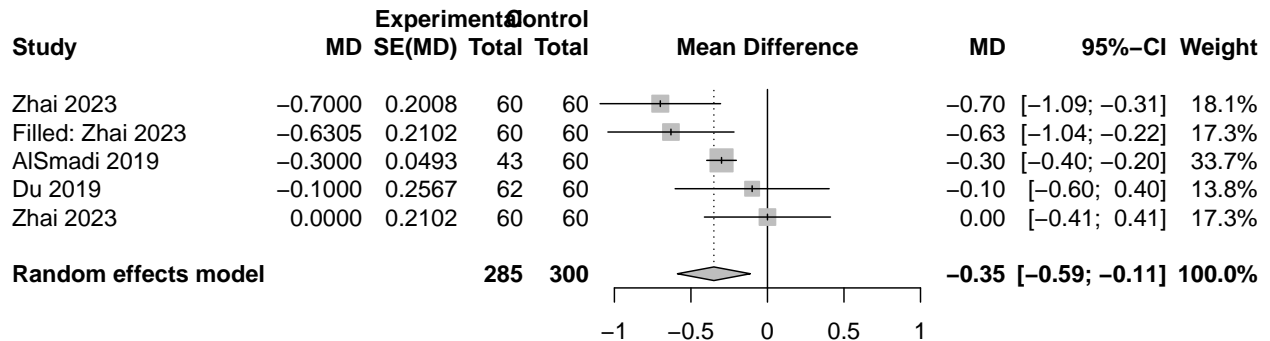



### 8.6.4 Funnel plot

```
funnel(trimfill(los_metacont))
```

```
## Warning in trimfill.meta(los_metacont): 3 observation(s) dropped due to missing  
## values
```

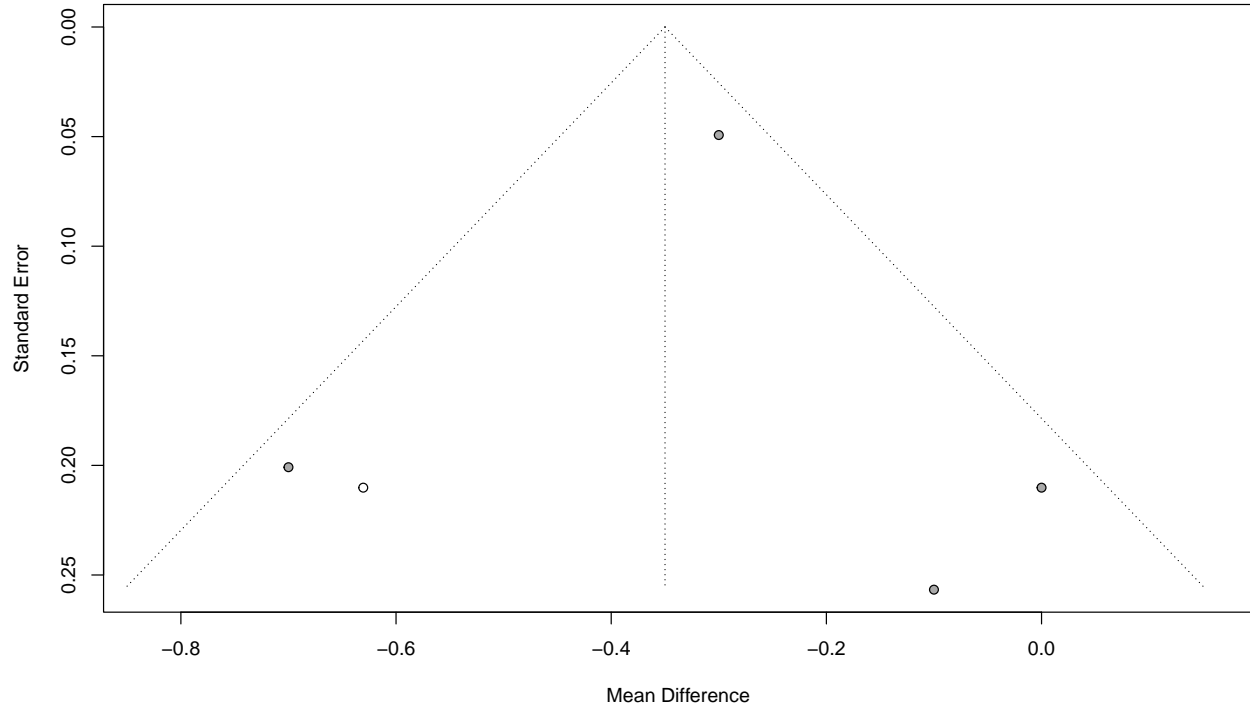

### 8.6.5 Baujat

```
baujat(los_metacont, pos = 1)
```

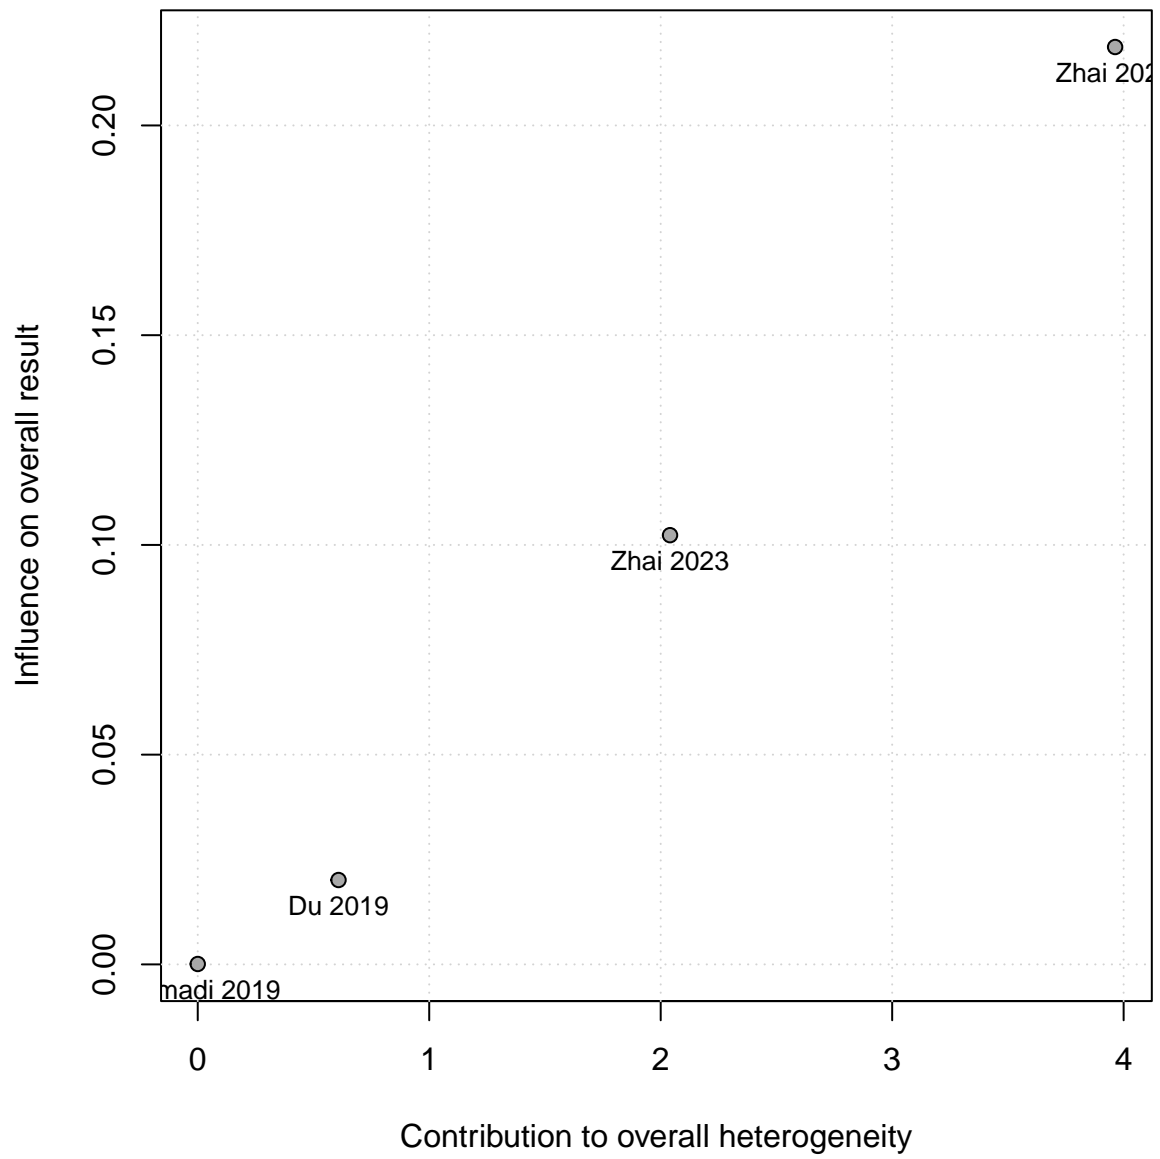

### 8.6.6 Leave one out

```
metainf(los_metacont)
```

```
## Influential analysis (common effect model)
##
##           MD           95%-CI  p-value  tau^2
## Omitting Du 2019      -0.3068 [-0.3983; -0.2153] < 0.0001 0.0648
## Omitting Zhang 2021  -0.3002 [-0.3902; -0.2102] < 0.0001 0.0406
## Omitting Lechevallier 2003 -0.3002 [-0.3902; -0.2102] < 0.0001 0.0406
## Omitting Wu 2022      -0.3002 [-0.3902; -0.2102] < 0.0001 0.0406
## Omitting Zhai 2023    -0.3152 [-0.4075; -0.2230] < 0.0001 0.0340
## Omitting Zhai 2023    -0.2781 [-0.3706; -0.1857] < 0.0001 0.0125
## Omitting AlSmadi 2019 -0.3014 [-0.5491; -0.0537] 0.0171 0.1057
##
## Pooled estimate      -0.3002 [-0.3902; -0.2102] < 0.0001 0.0406
##           tau      I^2
## Omitting Du 2019      0.2545 66.6%
## Omitting Zhang 2021  0.2015 54.6%
## Omitting Lechevallier 2003 0.2015 54.6%
## Omitting Wu 2022      0.2015 54.6%
## Omitting Zhai 2023    0.1843 55.2%
## Omitting Zhai 2023    0.1118 17.7%
## Omitting AlSmadi 2019 0.3251 69.8%
##
## Pooled estimate      0.2015 54.6%
##
## Details on meta-analytical method:
## - Inverse variance method
## - Restricted maximum-likelihood estimator for tau^2
```

## 8.7 Complications - All

### 8.7.1 Meta-analysis

```
comp_metabin <- metabin(data = semirigid_only,
                        event.c = complications_postop_overall_n_control,
                        n.c = sample_size_control,
                        event.e = complications_postop_overall_n_suction,
                        n.e = sample_size_suction,
                        studlab = author_year)
```

```
comp_metabin
```

```
## Number of studies: k = 6
## Number of observations: o = 754
## Number of events: e = 54
##
##              RR          95%-CI      z p-value
## Common effect model  0.3941 [0.2208; 0.7033] -3.15  0.0016
## Random effects model  0.4512 [0.2462; 0.8269] -2.58  0.0100
##
## Quantifying heterogeneity:
## tau^2 = 0 [0.0000; 2.9976]; tau = 0 [0.0000; 1.7314]
## I^2 = 0.0% [0.0%; 74.6%]; H = 1.00 [1.00; 1.99]
##
## Test of heterogeneity:
##      Q d.f. p-value
## 4.47   5  0.4836
##
## Details on meta-analytical method:
## - Mantel-Haenszel method
## - Inverse variance method
## - Restricted maximum-likelihood estimator for tau^2
## - Q-Profile method for confidence interval of tau^2 and tau
```

### 8.7.2 Forest plot

```
forest(comp_metabin,
       sortvar = TE)
```

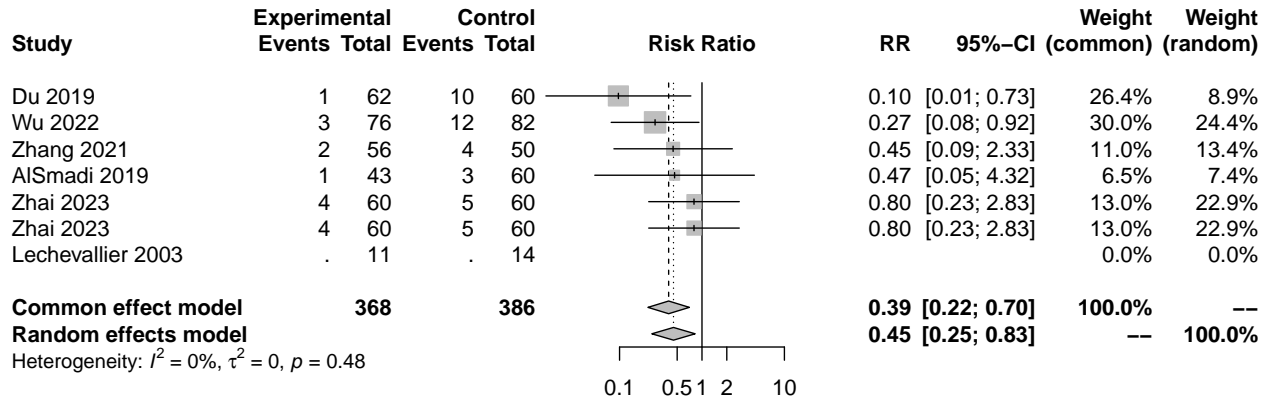

### 8.7.3 Trim and Fill

```
trimfill(comp_metabin)
```

```
## Warning in trimfill.meta(comp_metabin): 1 observation(s) dropped due to missing
## values

## Number of studies: k = 6 (with 0 added studies)
## Number of observations: o = 729
## Number of events: e = 54
##
##
##          RR          95%-CI      z p-value
## Random effects model 0.4512 [0.2462; 0.8269] -2.58 0.0100
##
## Quantifying heterogeneity:
## tau^2 = 0 [0.0000; 2.9976]; tau = 0 [0.0000; 1.7314]
## I^2 = 0.0% [0.0%; 74.6%]; H = 1.00 [1.00; 1.99]
##
## Test of heterogeneity:
##   Q d.f. p-value
## 4.47  5 0.4836
##
## Details on meta-analytical method:
## - Inverse variance method
## - Restricted maximum-likelihood estimator for tau^2
## - Q-Profile method for confidence interval of tau^2 and tau
## - Trim-and-fill method to adjust for funnel plot asymmetry (L-estimator)
```

```
forest(trimfill(comp_metabin),
        sortvar = TE)
```

```
## Warning in trimfill.meta(comp_metabin): 1 observation(s) dropped due to missing
## values
```

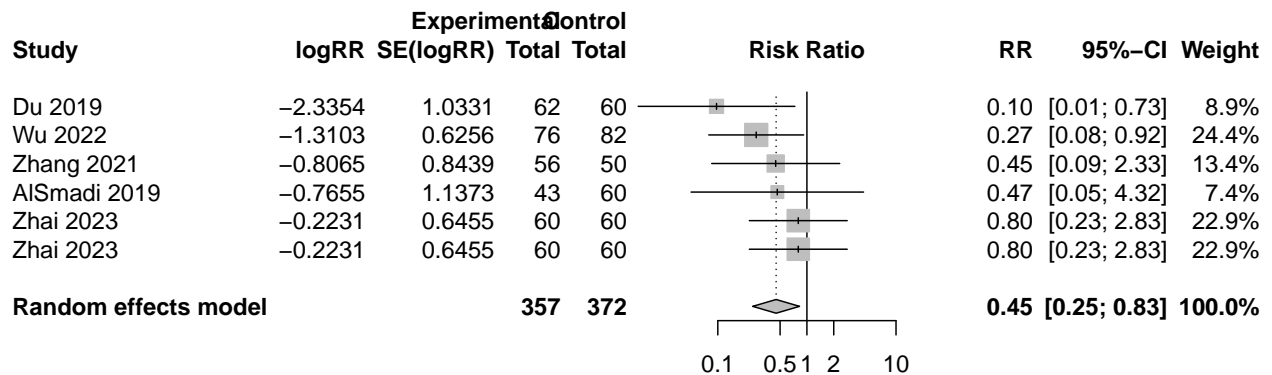

### 8.7.4 Funnel plot

```
funnel(trimfill(comp_metabin))
```

```
## Warning in trimfill.meta(comp_metabin): 1 observation(s) dropped due to missing  
## values
```

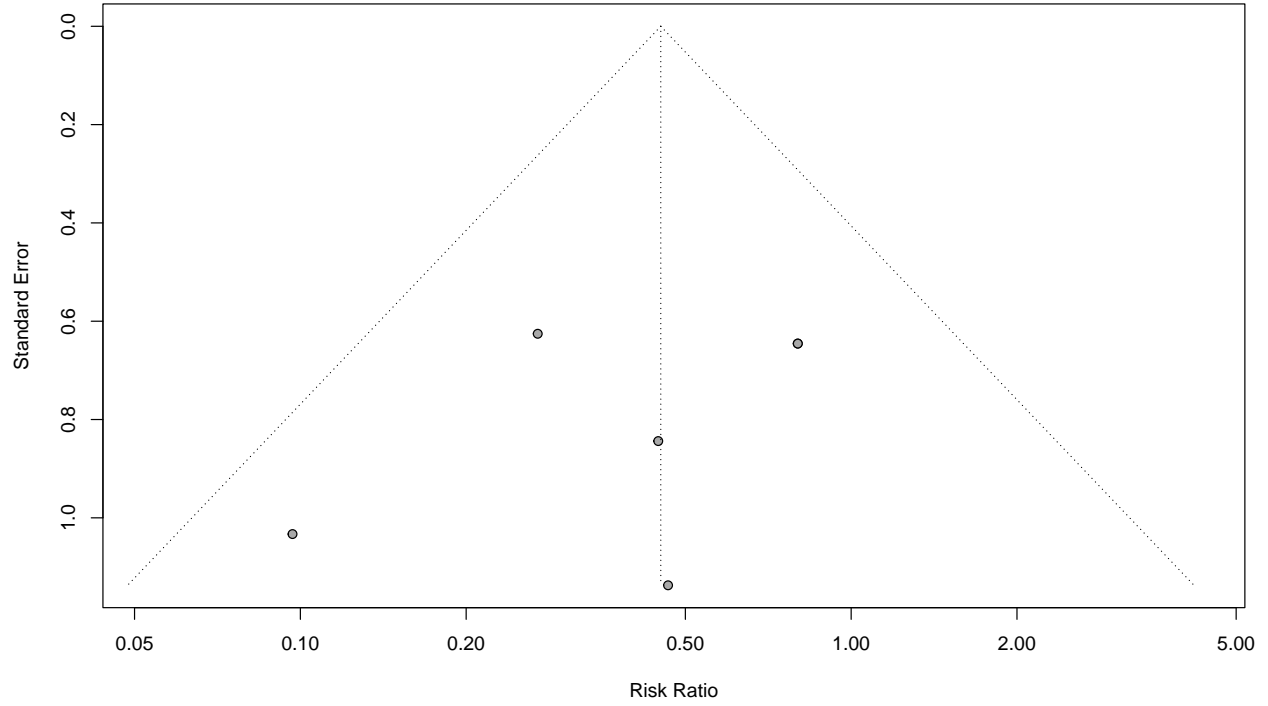

### 8.7.5 Baujat

```
baujat(comp_metabin, pos = 1)
```

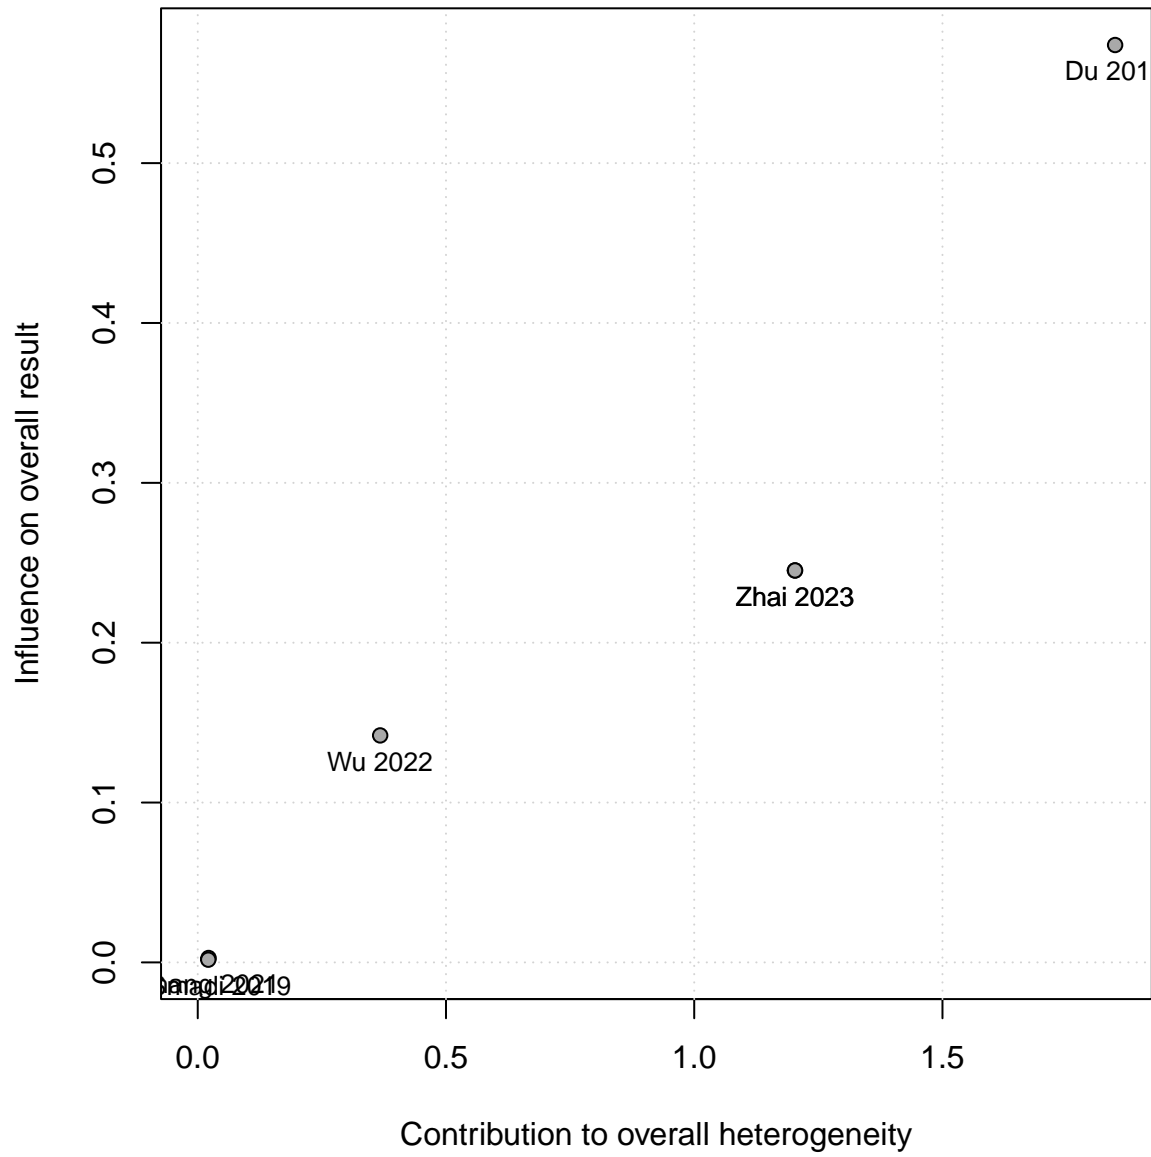



### 8.7.6 Leave one out

```
metainf(comp_metabin)
```

```
## Influential analysis (common effect model)
##
##
##          RR          95%-CI p-value  tau^2   tau
## Omitting Du 2019      0.5010 [0.2693; 0.9321]  0.0291  0.0000  0.0000
## Omitting Zhang 2021   0.3876 [0.2089; 0.7195]  0.0027  0.0516  0.2271
## Omitting Lechevallier 2003 0.3941 [0.2208; 0.7033]  0.0016  0.0000  0.0000
## Omitting Wu 2022      0.4475 [0.2311; 0.8665]  0.0171  0.0000  0.0000
## Omitting Zhai 2023    0.3334 [0.1720; 0.6463]  0.0011  0.0000  0.0000
## Omitting Zhai 2023    0.3334 [0.1720; 0.6463]  0.0011  0.0000  0.0000
## Omitting AlSmadi 2019  0.3892 [0.2136; 0.7090]  0.0020  0.0039  0.0626
##
## Pooled estimate      0.3941 [0.2208; 0.7033]  0.0016  0.0000  0.0000
##
##          I^2
## Omitting Du 2019      0.0%
## Omitting Zhang 2021   10.6%
## Omitting Lechevallier 2003 0.0%
## Omitting Wu 2022      0.0%
## Omitting Zhai 2023    0.0%
## Omitting Zhai 2023    0.0%
## Omitting AlSmadi 2019 10.5%
##
## Pooled estimate      0.0%
##
## Details on meta-analytical method:
## - Mantel-Haenszel method
## - Restricted maximum-likelihood estimator for tau^2
```

## 8.8 Fever

### 8.8.1 Meta-analysis

```
fever_metabin <- metabin(data = semirigid_only,
                        event.c = fever_n_control,
                        n.c = sample_size_control,
                        event.e = fever_n_suction,
                        n.e = sample_size_suction,
                        studlab = author_year)

fever_metabin

## Number of studies: k = 3
## Number of observations: o = 754
## Number of events: e = 28
##
##              RR          95%-CI      z p-value
## Common effect model 0.2741 [0.1132; 0.6638] -2.87 0.0041
## Random effects model 0.2932 [0.1189; 0.7231] -2.66 0.0077
##
## Quantifying heterogeneity:
## tau^2 = 0 [0.0000; 20.1531]; tau = 0 [0.0000; 4.4892]
## I^2 = 0.0% [0.0%; 89.6%]; H = 1.00 [1.00; 3.10]
##
## Test of heterogeneity:
##      Q d.f. p-value
## 1.16   2 0.5607
##
## Details on meta-analytical method:
## - Mantel-Haenszel method
## - Inverse variance method
## - Restricted maximum-likelihood estimator for tau^2
## - Q-Profile method for confidence interval of tau^2 and tau
```

### 8.8.2 Forest plot

```
forest(fever_metabin,
       sortvar = TE)
```

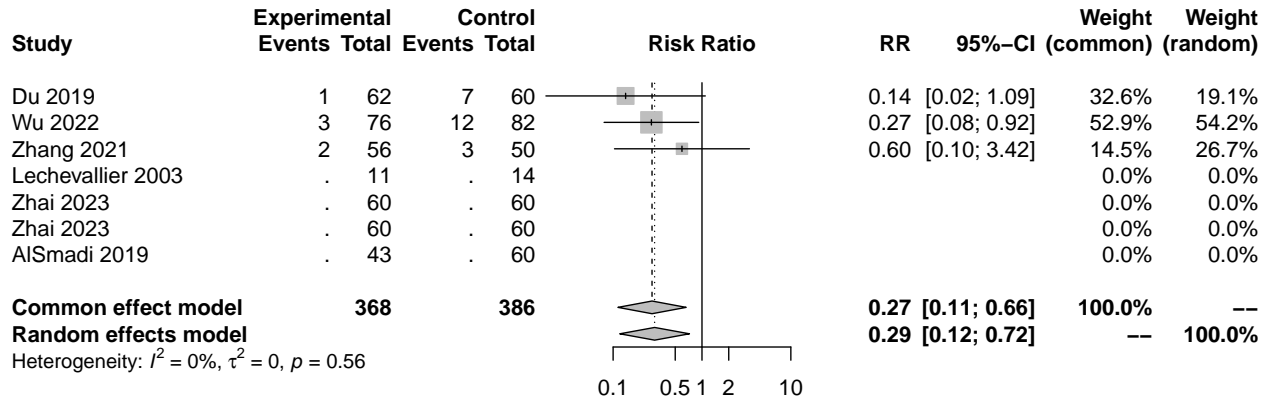

### 8.8.3 Trim and Fill

```
trimfill(fever_metabin)
```

```
## Warning in trimfill.meta(fever_metabin): 4 observation(s) dropped due to
## missing values

## Number of studies: k = 4 (with 1 added studies)
## Number of observations: o = 508
## Number of events: e = 36
##
##                      RR          95%-CI      z p-value
## Random effects model 0.3502 [0.1531; 0.8008] -2.49  0.0129
##
## Quantifying heterogeneity:
## tau^2 = 0 [0.0000; 8.5047]; tau = 0 [0.0000; 2.9163]
## I^2 = 0.0% [0.0%; 84.7%]; H = 1.00 [1.00; 2.56]
##
## Test of heterogeneity:
##   Q d.f. p-value
## 2.08   3  0.5551
##
## Details on meta-analytical method:
## - Inverse variance method
## - Restricted maximum-likelihood estimator for tau^2
## - Q-Profile method for confidence interval of tau^2 and tau
## - Trim-and-fill method to adjust for funnel plot asymmetry (L-estimator)
```

```
forest(trimfill(fever_metabin),
        sortvar = TE)
```

```
## Warning in trimfill.meta(fever_metabin): 4 observation(s) dropped due to
## missing values
```

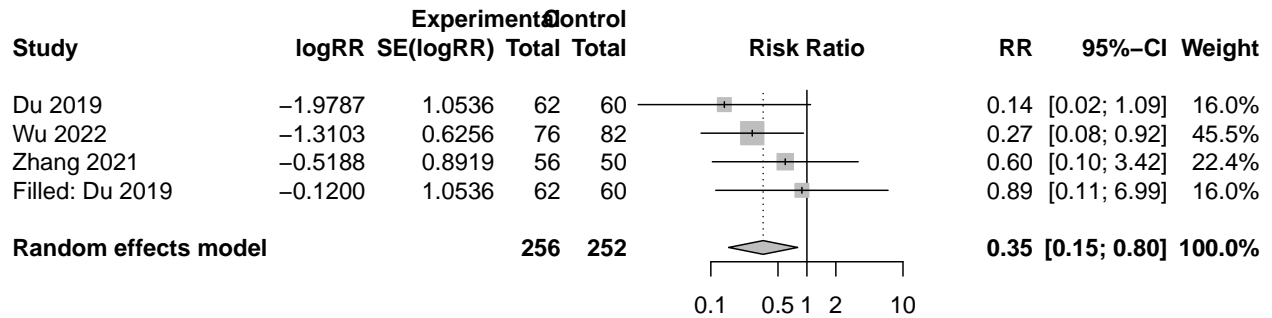

### 8.8.4 Funnel plot

```
funnel(trimfill(fever_metabin))
```

```
## Warning in trimfill.meta(fever_metabin): 4 observation(s) dropped due to  
## missing values
```

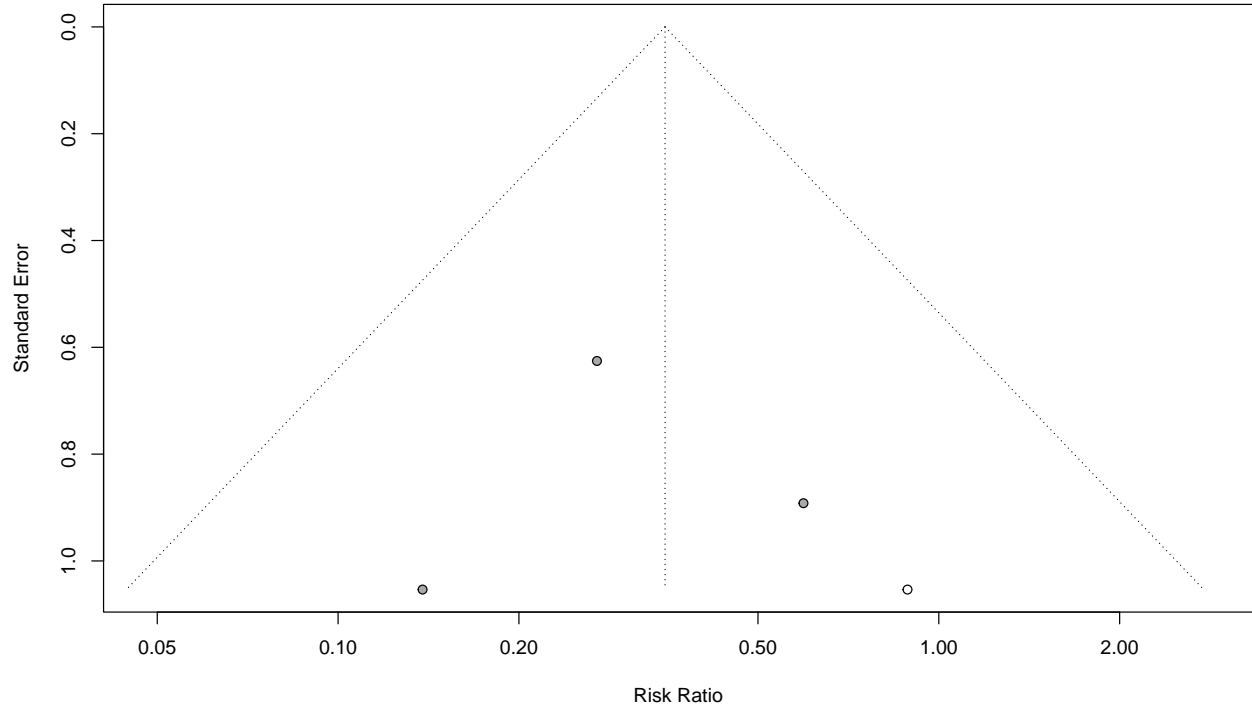

### 8.8.5 Baujat

```
baujat(fever_metabin, pos = 1)
```

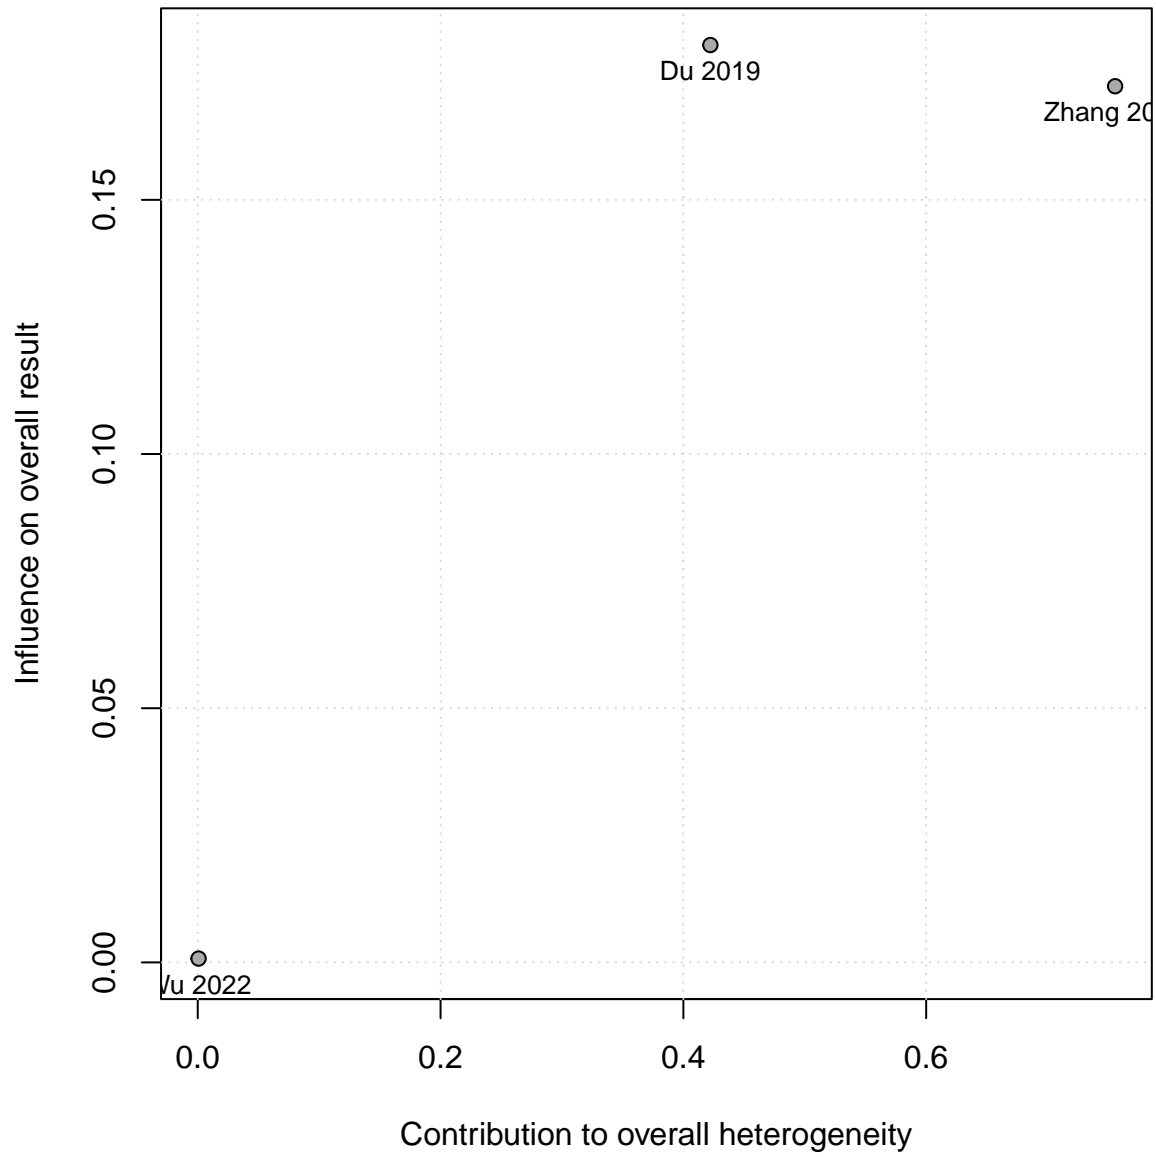

### 8.8.6 Leave one out

```
metainf(fever_metabin)
```

```
## Influential analysis (common effect model)
##
##           RR           95%-CI p-value   tau^2    tau
## Omitting Du 2019      0.3399 [0.1261; 0.9159] 0.0329 0.0000 0.0000
## Omitting Zhang 2021  0.2196 [0.0770; 0.6259] 0.0046 0.0000 0.0000
## Omitting Lechevallier 2003 0.2741 [0.1132; 0.6638] 0.0041 0.0000 0.0000
## Omitting Wu 2022     0.2791 [0.0779; 1.0005] 0.0501 0.1129 0.3360
## Omitting Zhai 2023   0.2741 [0.1132; 0.6638] 0.0041 0.0000 0.0000
## Omitting Zhai 2023   0.2741 [0.1132; 0.6638] 0.0041 0.0000 0.0000
## Omitting AlSmadi 2019 0.2741 [0.1132; 0.6638] 0.0041 0.0000 0.0000
##
## Pooled estimate      0.2741 [0.1132; 0.6638] 0.0041 0.0000 0.0000
##           I^2
## Omitting Du 2019      0.0%
## Omitting Zhang 2021  0.0%
## Omitting Lechevallier 2003 0.0%
## Omitting Wu 2022     10.6%
## Omitting Zhai 2023   0.0%
## Omitting Zhai 2023   0.0%
## Omitting AlSmadi 2019 0.0%
##
## Pooled estimate      0.0%
##
## Details on meta-analytical method:
## - Mantel-Haenszel method
## - Restricted maximum-likelihood estimator for tau^2
```

## 8.9 Infections

### 8.9.1 Meta-analysis

```
infection_metabin <- metabin(data = semirigid_only,
                             event.c = infection_n_control,
                             n.c = sample_size_control,
                             event.e = infection_n_suction,
                             n.e = sample_size_suction,
                             studlab = author_year)

infection_metabin

## Number of studies: k = 3
## Number of observations: o = 754
## Number of events: e = 28
##
##              RR          95%-CI      z p-value
## Common effect model 0.2741 [0.1132; 0.6638] -2.87 0.0041
## Random effects model 0.2932 [0.1189; 0.7231] -2.66 0.0077
##
## Quantifying heterogeneity:
## tau^2 = 0 [0.0000; 20.1531]; tau = 0 [0.0000; 4.4892]
## I^2 = 0.0% [0.0%; 89.6%]; H = 1.00 [1.00; 3.10]
##
## Test of heterogeneity:
##      Q d.f. p-value
## 1.16  2 0.5607
##
## Details on meta-analytical method:
## - Mantel-Haenszel method
## - Inverse variance method
## - Restricted maximum-likelihood estimator for tau^2
## - Q-Profile method for confidence interval of tau^2 and tau
```



### 8.9.2 Forest plot

```
forest(infection_metabin,
       sortvar = TE)
```



### 8.9.3 Trim and Fill

```
trimfill(infection_metabin)
```

```
## Warning in trimfill.meta(infection_metabin): 4 observation(s) dropped due to
## missing values
```

```
## Number of studies: k = 4 (with 1 added studies)
## Number of observations: o = 508
## Number of events: e = 36
##
##              RR          95%-CI      z p-value
## Random effects model 0.3502 [0.1531; 0.8008] -2.49  0.0129
##
## Quantifying heterogeneity:
## tau^2 = 0 [0.0000; 8.5047]; tau = 0 [0.0000; 2.9163]
## I^2 = 0.0% [0.0%; 84.7%]; H = 1.00 [1.00; 2.56]
##
## Test of heterogeneity:
##   Q d.f. p-value
## 2.08   3  0.5551
##
## Details on meta-analytical method:
## - Inverse variance method
## - Restricted maximum-likelihood estimator for tau^2
## - Q-Profile method for confidence interval of tau^2 and tau
## - Trim-and-fill method to adjust for funnel plot asymmetry (L-estimator)
```

```
forest(trimfill(infection_metabin),
        sortvar = TE)
```

```
## Warning in trimfill.meta(infection_metabin): 4 observation(s) dropped due to
## missing values
```

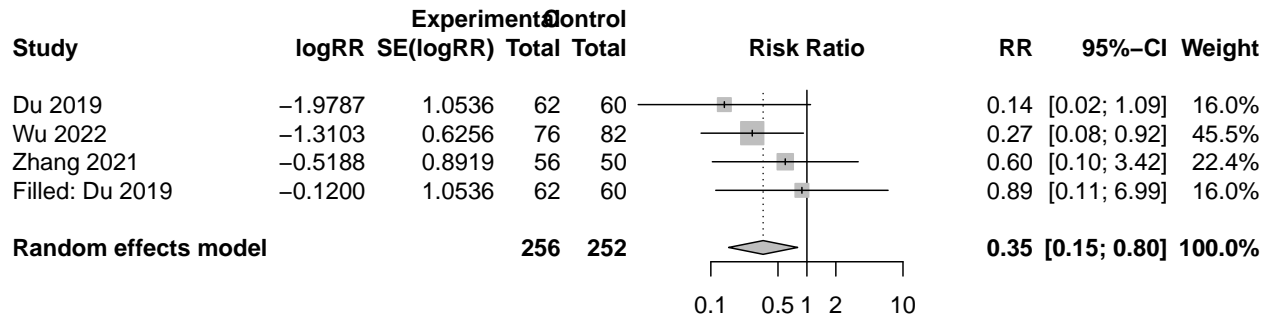

### 8.9.4 Funnel plot

```
funnel(trimfill(infection_metabin))
```

```
## Warning in trimfill.meta(infection_metabin): 4 observation(s) dropped due to  
## missing values
```



### 8.9.5 Baujat

```
baujat(infection_metabin, pos = 1)
```



### 8.9.6 Leave one out

```
metainf(infection_metabin)
```

```
## Influential analysis (common effect model)
##
##           RR           95%-CI p-value  tau^2   tau
## Omitting Du 2019      0.3399 [0.1261; 0.9159]  0.0329  0.0000  0.0000
## Omitting Zhang 2021   0.2196 [0.0770; 0.6259]  0.0046  0.0000  0.0000
## Omitting Lechevallier 2003 0.2741 [0.1132; 0.6638]  0.0041  0.0000  0.0000
## Omitting Wu 2022      0.2791 [0.0779; 1.0005]  0.0501  0.1129  0.3360
## Omitting Zhai 2023    0.2741 [0.1132; 0.6638]  0.0041  0.0000  0.0000
## Omitting Zhai 2023    0.2741 [0.1132; 0.6638]  0.0041  0.0000  0.0000
## Omitting AlSmadi 2019  0.2741 [0.1132; 0.6638]  0.0041  0.0000  0.0000
##
## Pooled estimate      0.2741 [0.1132; 0.6638]  0.0041  0.0000  0.0000
##           I^2
## Omitting Du 2019      0.0%
## Omitting Zhang 2021   0.0%
## Omitting Lechevallier 2003 0.0%
## Omitting Wu 2022      10.6%
## Omitting Zhai 2023    0.0%
## Omitting Zhai 2023    0.0%
## Omitting AlSmadi 2019  0.0%
##
## Pooled estimate      0.0%
##
## Details on meta-analytical method:
## - Mantel-Haenszel method
## - Restricted maximum-likelihood estimator for tau^2
```

## 8.10 Sepsis

### 8.10.1 Meta-analysis

```
sepsis_metabin <- metabin(data = semirigid_only,
                          event.c = sepsis_n_control,
                          n.c = sample_size_control,
                          event.e = sepsis_n_suction,
                          n.e = sample_size_suction,
                          studlab = author_year)

sepsis_metabin

## Number of studies: k = 0
## Number of observations: o = 754
## Number of events: e = 0
##
##
##          RR 95%-CI  z p-value
## Common effect model NA      --   --
## Random effects model NA      --   --
##
## Quantifying heterogeneity:
## tau^2 = NA; tau = NA; I^2 = NA; H = NA
##
## Details on meta-analytical method:
## - Mantel-Haenszel method
## - Inverse variance method
## - Restricted maximum-likelihood estimator for tau^2
```

### 8.10.2 Forest plot

```
forest(sepsis_metabin,
       sortvar = TE)
```

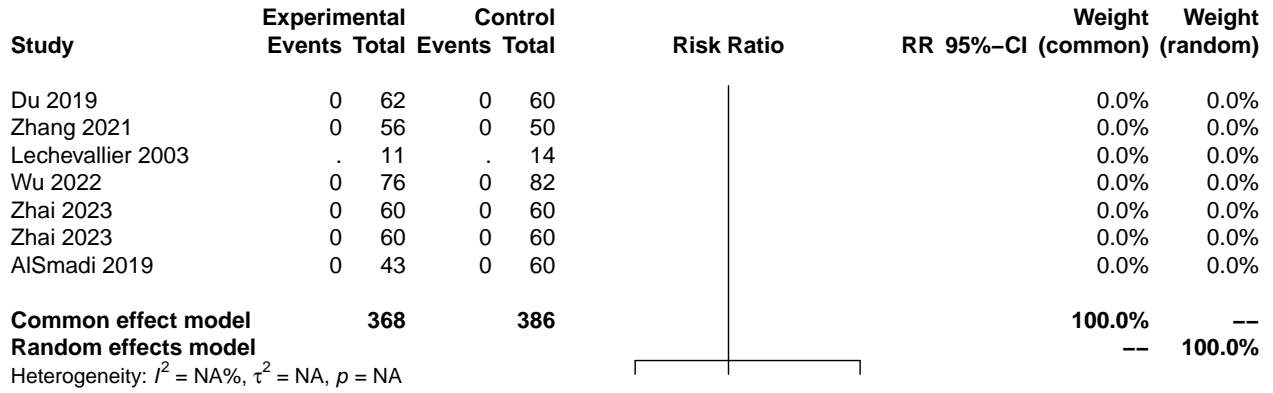

### 8.10.3 Trim and Fill

```
#trimfill(sepsis_metabin)  
#forest(trimfill(sepsis_metabin),  
#      sortvar = TE)
```



#### 8.10.4 Funnel plot

```
#funnel((sepsis_metabin))
```

### 8.10.5 Baujat

```
#baujat(sepsis_metabin, pos = 1)
```

### 8.10.6 Leave one out

```
metainf(sepsis_metabin)
```

```
## Influential analysis (common effect model)
##
##                               RR 95%-CI p-value tau^2 tau I^2
## Omitting Du 2019
## Omitting Zhang 2021
## Omitting Lechevallier 2003
## Omitting Wu 2022
## Omitting Zhai 2023
## Omitting Zhai 2023
## Omitting AlSmadi 2019
##
## Pooled estimate
##
## Details on meta-analytical method:
## - Mantel-Haenszel method
## - Restricted maximum-likelihood estimator for tau^2
```

## 8.11 Abscess

### 8.11.1 Meta-analysis

```
abscess_metabin <- metabin(data = semirigid_only,
                           event.c = abscess_n_control,
                           n.c = sample_size_control,
                           event.e = abscess_n_suction,
                           n.e = sample_size_suction,
                           studlab = author_year)

abscess_metabin

## Number of studies: k = 0
## Number of observations: o = 754
## Number of events: e = 0
##
##                RR 95%-CI  z p-value
## Common effect model  NA      --      --
## Random effects model NA      --      --
##
## Quantifying heterogeneity:
## tau^2 = NA; tau = NA; I^2 = NA; H = NA
##
## Details on meta-analytical method:
## - Mantel-Haenszel method
## - Inverse variance method
## - Restricted maximum-likelihood estimator for tau^2
```

### 8.11.2 Forest plot

```
forest(abscess_metabin,
       sortvar = TE)
```

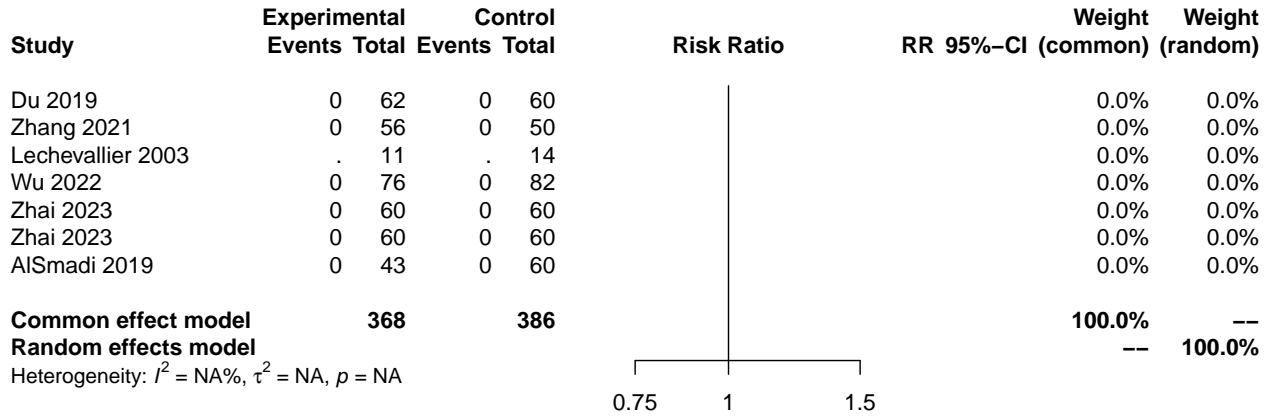

### 8.11.3 Trim and Fill

```
#trimfill(abscess_metabin)  
#forest(trimfill(abscess_metabin),  
#      sortvar = TE)
```

#### 8.11.4 Funnel plot

```
#funnel((abscess_metabin))
```

### 8.11.5 Baujat

```
#baujat(abscess_metabin, pos = 1)
```



### 8.11.6 Leave one out

```
#metainf(abscess_metabin)
```

## 8.12 Haematoma

### 8.12.1 Meta-analysis

```
haematoma_metabin <- metabin(data = semirigid_only,
                             event.c = hematoma_n_control,
                             n.c = sample_size_control,
                             event.e = hematoma_n_suction,
                             n.e = sample_size_suction,
                             studlab = author_year)
```

```
haematoma_metabin
```

```
## Number of studies: k = 0
## Number of observations: o = 754
## Number of events: e = 0
##
##                RR 95%-CI  z p-value
## Common effect model  NA      --      --
## Random effects model NA      --      --
##
## Quantifying heterogeneity:
## tau^2 = NA; tau = NA; I^2 = NA; H = NA
##
## Details on meta-analytical method:
## - Mantel-Haenszel method
## - Inverse variance method
## - Restricted maximum-likelihood estimator for tau^2
```

### 8.12.2 Forest plot

```
forest(haematoma_metabin,
       sortvar = TE)
```

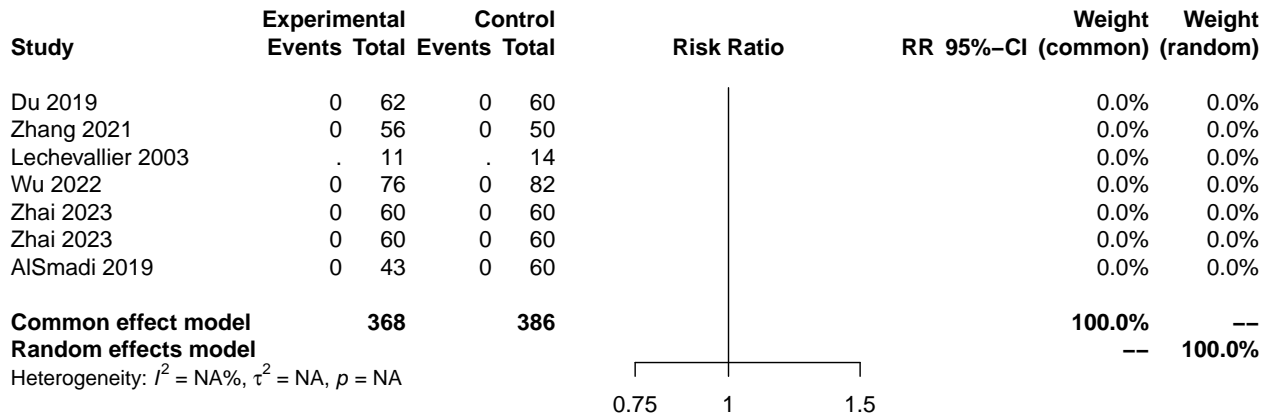

### 8.12.3 Trim and Fill

```
#trimfill(haematoma_metabin)  
#forest(trimfill(haematoma_metabin),  
#      sortvar = TE)
```

#### 8.12.4 Funnel plot

```
#funnel(haematoma_metabin)
```

### 8.12.5 Baujat

```
#baujat(haematoma_metabin, pos = 1)
```

### 8.12.6 Leave one out

```
#metainf(haematoma_metabin)
```

## 8.13 Pain

### 8.13.1 Meta-analysis

```
pain_metabin <- metabin(data = semirigid_only,
                        event.c = pain_n_control,
                        n.c = sample_size_control,
                        event.e = pain_n_suction,
                        n.e = sample_size_suction,
                        studlab = author_year)

pain_metabin

## Number of studies: k = 1
## Number of observations: o = 754
## Number of events: e = 1
##
##              RR          95%-CI      z p-value
## Common effect model  0.2982 [0.0124; 7.1592] -0.75  0.4556
## Random effects model 0.2979 [0.0124; 7.1502] -0.75  0.4552
##
## Quantifying heterogeneity:
## tau^2 = NA; tau = NA; I^2 = NA; H = NA
##
## Details on meta-analytical method:
## - Mantel-Haenszel method
## - Inverse variance method
## - Restricted maximum-likelihood estimator for tau^2
## - Continuity correction of 0.5 in studies with zero cell frequencies
```



### 8.13.2 Forest plot

```
forest(pain_metabin,
       sortvar = TE)
```

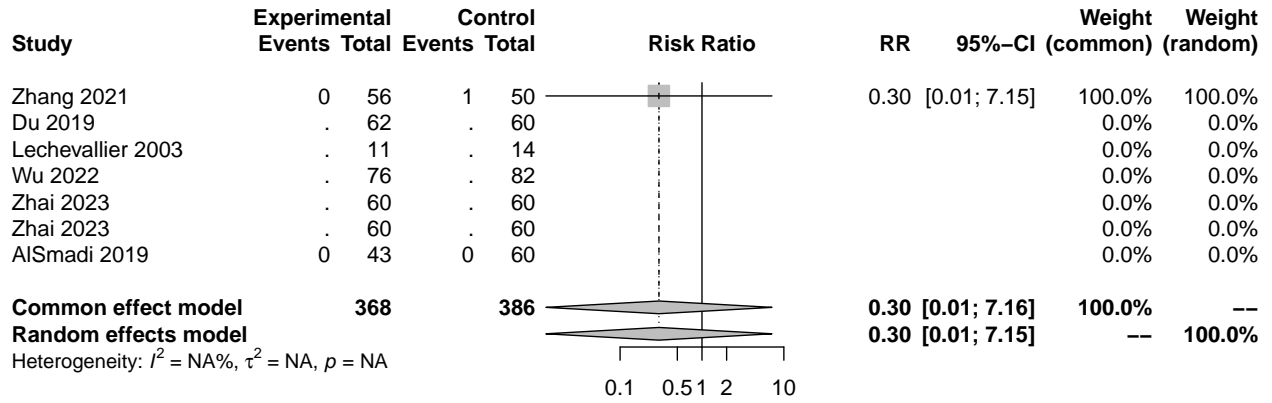

### 8.13.3 Trim and Fill

```
#trimfill(pain_metabin)  
#forest(trimfill(pain_metabin),  
#      sortvar = TE)
```

### 8.13.4 Funnel plot

```
funnel((pain_metabin))
```

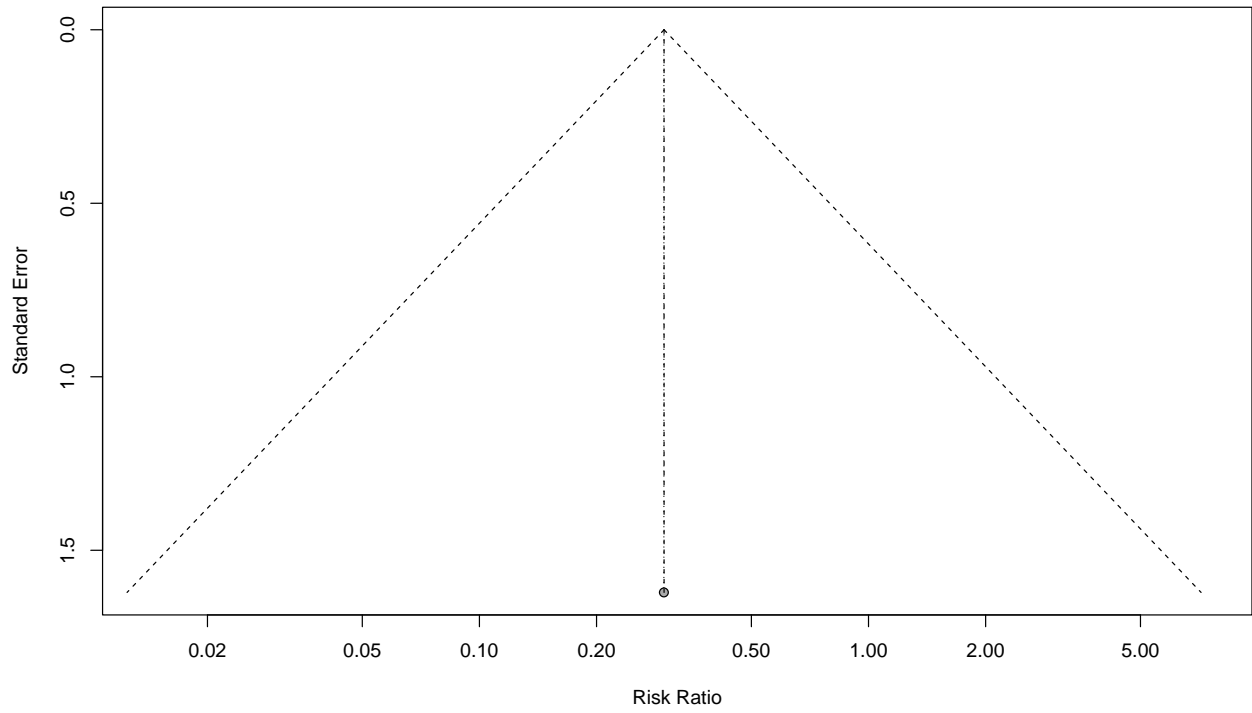

### 8.13.5 Baujat

```
baujat(pain_metabin, pos = 1)
```

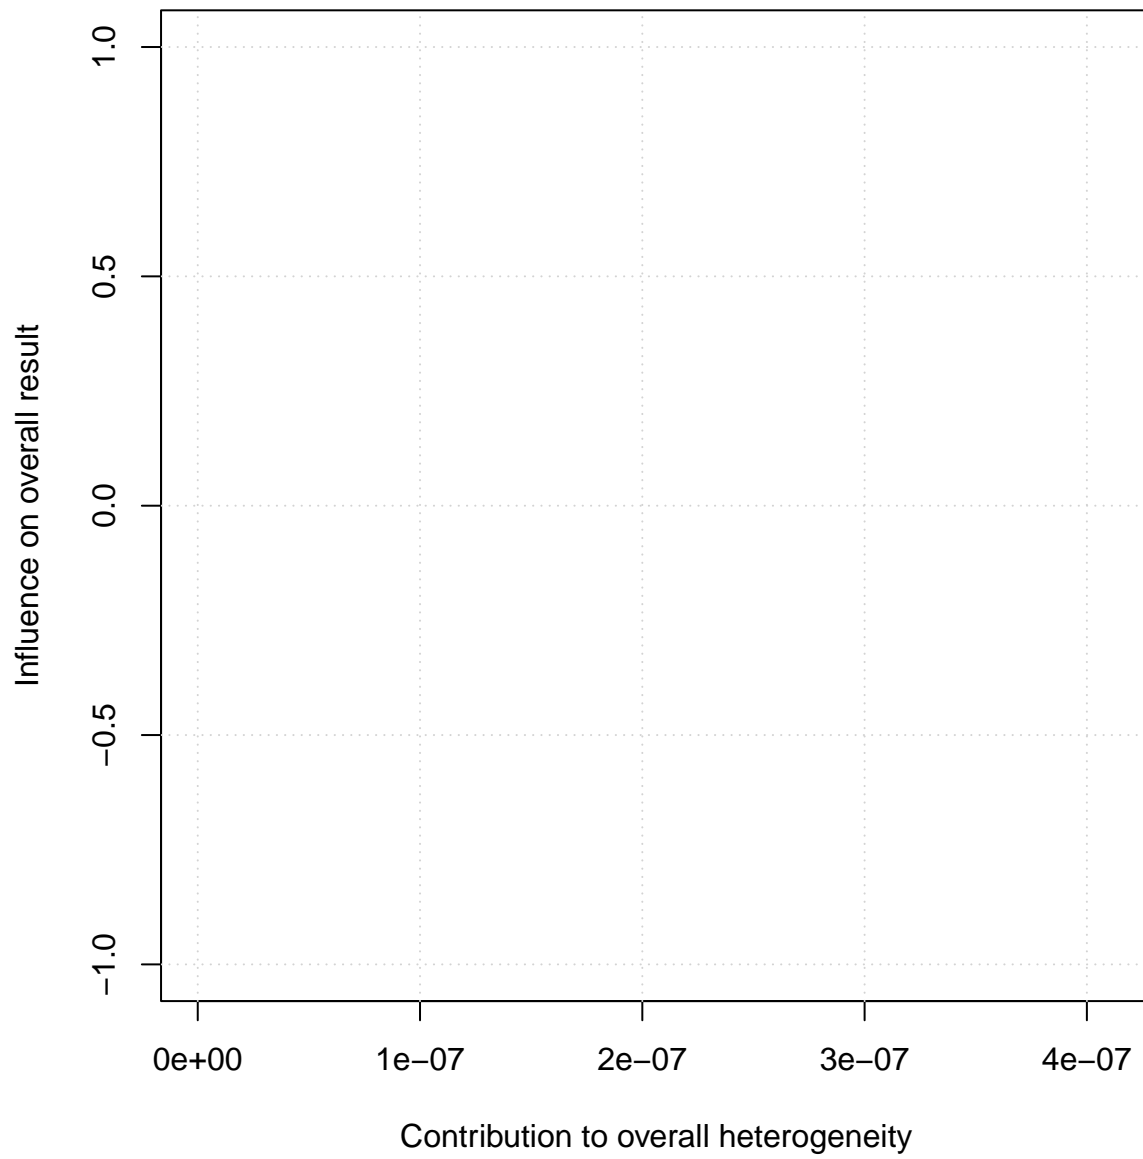

### 8.13.6 Leave one out

```
metainf(pain_metabin, pos = 1)
```

```
## Influential analysis (common effect model)
##
##
##          RR          95%-CI p-value tau^2 tau I^2
## Omitting Du 2019      0.2982 [0.0124; 7.1592] 0.4556
## Omitting Zhang 2021
## Omitting Lechevallier 2003 0.2982 [0.0124; 7.1592] 0.4556
## Omitting Wu 2022      0.2982 [0.0124; 7.1592] 0.4556
## Omitting Zhai 2023    0.2982 [0.0124; 7.1592] 0.4556
## Omitting Zhai 2023    0.2982 [0.0124; 7.1592] 0.4556
## Omitting AlSmadi 2019 0.2982 [0.0124; 7.1592] 0.4556
##
## Pooled estimate      0.2982 [0.0124; 7.1592] 0.4556
##
## Details on meta-analytical method:
## - Mantel-Haenszel method
## - Restricted maximum-likelihood estimator for tau^2
```

## 8.14 Stricture

### 8.14.1 Meta-analysis

```
stricture_metabin <- metabin(data = semirigid_only,
                             event.c = stricture_n_control,
                             n.c = sample_size_control,
                             event.e = stricture_n_suction,
                             n.e = sample_size_suction,
                             studlab = author_year)

stricture_metabin

## Number of studies: k = 1
## Number of observations: o = 754
## Number of events: e = 3
##
##              RR          95%-CI      z p-value
## Common effect model 0.1383 [0.0073; 2.6222] -1.32 0.1876
## Random effects model 0.1383 [0.0073; 2.6211] -1.32 0.1875
##
## Quantifying heterogeneity:
## tau^2 = NA; tau = NA; I^2 = NA; H = NA
##
## Details on meta-analytical method:
## - Mantel-Haenszel method
## - Inverse variance method
## - Restricted maximum-likelihood estimator for tau^2
## - Continuity correction of 0.5 in studies with zero cell frequencies
```

### 8.14.2 Forest plot

```
forest(stricture_metabin,
       sortvar = TE)
```

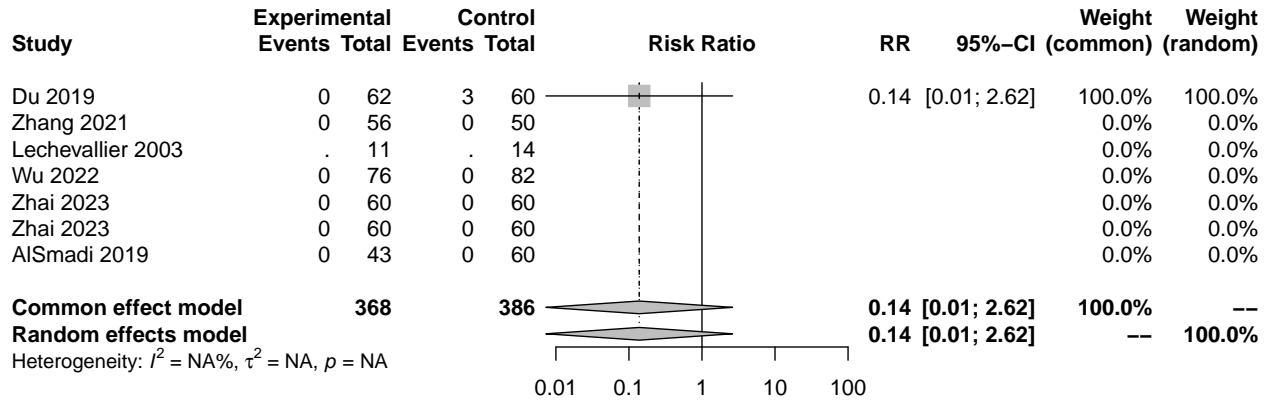

### 8.14.3 Trim and Fill

```
#trimfill(stricture_metabin)  
#forest(trimfill(stricture_metabin),  
#      sortvar = TE)
```



#### 8.14.4 Funnel plot

```
funnel((stricture_metabin))
```

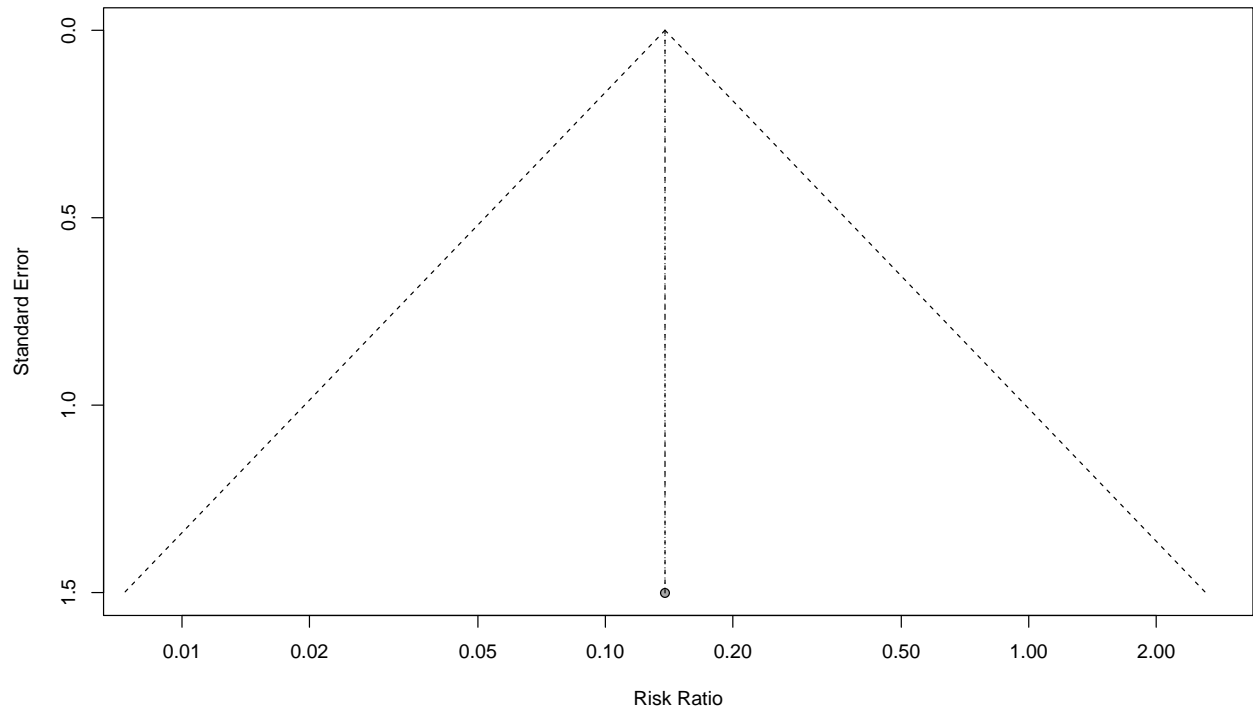

### 8.14.5 Baujat

```
baujat(stricture_metabin, pos = 1)
```

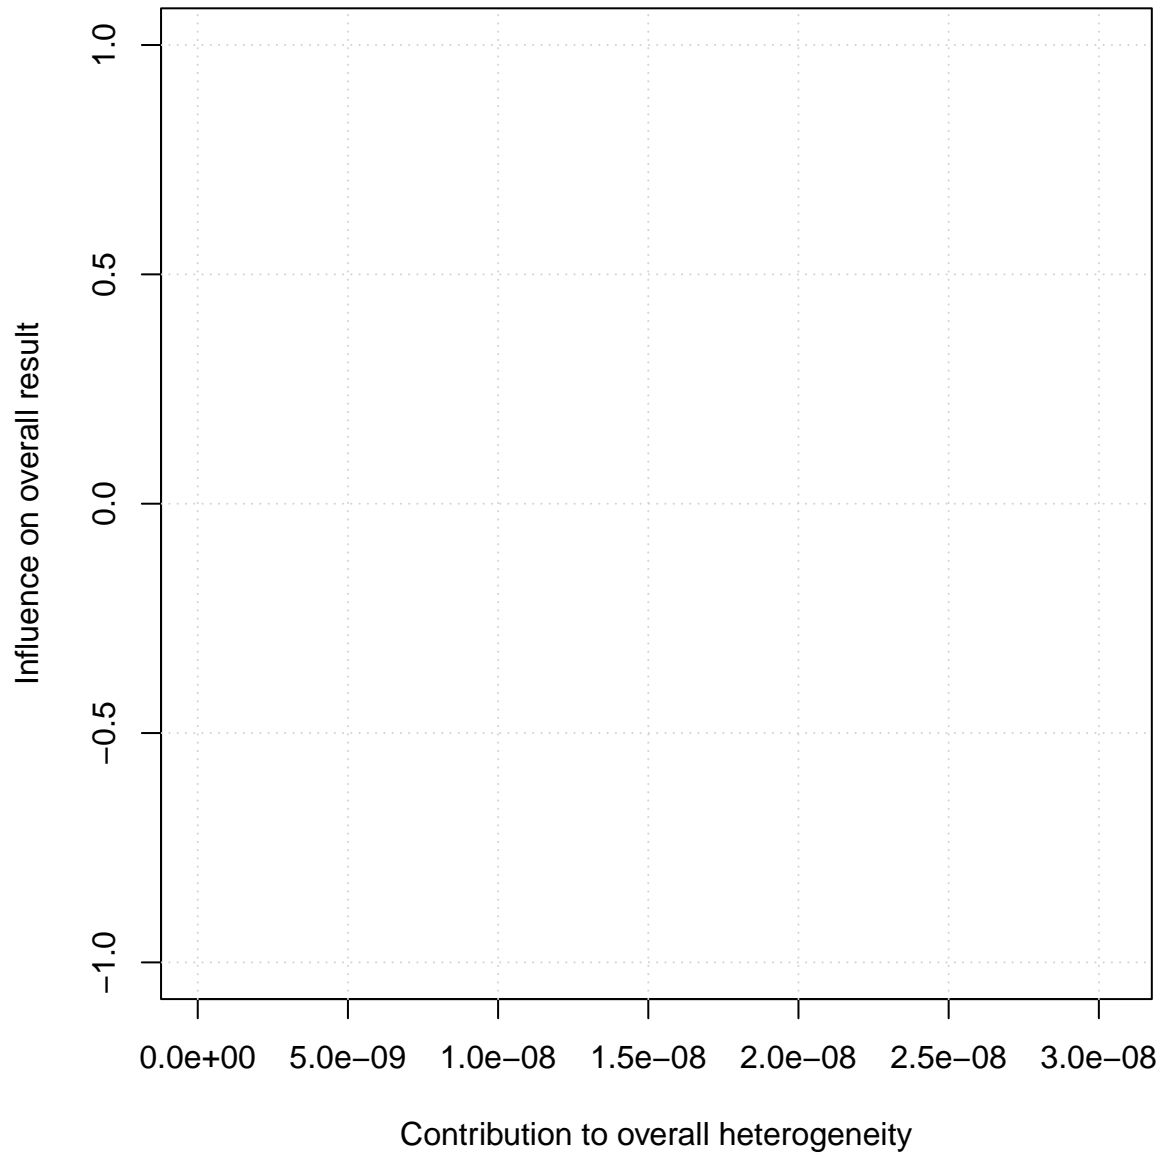

### 8.14.6 Leave one out

```
metainf(stricture_metabin)
```

```
## Influential analysis (common effect model)
##
##           RR           95%-CI p-value tau^2 tau I^2
## Omitting Du 2019
## Omitting Zhang 2021      0.1383 [0.0073; 2.6222] 0.1876
## Omitting Lechevallier 2003 0.1383 [0.0073; 2.6222] 0.1876
## Omitting Wu 2022        0.1383 [0.0073; 2.6222] 0.1876
## Omitting Zhai 2023       0.1383 [0.0073; 2.6222] 0.1876
## Omitting Zhai 2023       0.1383 [0.0073; 2.6222] 0.1876
## Omitting AlSmadi 2019    0.1383 [0.0073; 2.6222] 0.1876
##
## Pooled estimate          0.1383 [0.0073; 2.6222] 0.1876
##
## Details on meta-analytical method:
## - Mantel-Haenszel method
## - Restricted maximum-likelihood estimator for tau^2
```

## 8.15 Embolisation required

### 8.15.1 Meta-analysis

```
ir_embolisation_metabin <- metabin(data = semirigid_only,
                                   event.c = embolism_ir_intervention_n_control,
                                   n.c = sample_size_control,
                                   event.e = embolism_ir_intervention_n_suction,
                                   n.e = sample_size_suction,
                                   studlab = author_year)
ir_embolisation_metabin
```

```
## Number of studies: k = 0
## Number of observations: o = 754
## Number of events: e = 0
##
##                RR 95%-CI  z p-value
## Common effect model  NA      --      --
## Random effects model NA      --      --
##
## Quantifying heterogeneity:
## tau^2 = NA; tau = NA; I^2 = NA; H = NA
##
## Details on meta-analytical method:
## - Mantel-Haenszel method
## - Inverse variance method
## - Restricted maximum-likelihood estimator for tau^2
```

### 8.15.2 Forest plot

```
forest(ir_embolisation_metabin,
       sortvar = TE)
```



### 8.15.3 Trim and Fill

```
#trimfill(ir_embolisation_metabin)  
#forest(trimfill(ir_embolisation_metabin),  
#      sortvar = TE)
```

#### 8.15.4 Funnel plot

```
#funnel(ir_embolisation_metabin)
```

### 8.15.5 Baujat

```
#baujat(ir_embolisation_metabin, pos = 1)
```



### 8.15.6 Leave one out

```
#metainf(ir_embolisation_metabin)
```

## 8.16 Transfusion

### 8.16.1 Meta-analysis

```
transfusion_metabin <- metabin(data = semirigid_only,
                               event.c = transfusion_n_control,
                               n.c = sample_size_control,
                               event.e = transfusion_n_suction,
                               n.e = sample_size_suction,
                               studlab = author_year)

transfusion_metabin
```

```
## Number of studies: k = 0
## Number of observations: o = 754
## Number of events: e = 0
##
##                RR 95%-CI  z p-value
## Common effect model  NA      --      --
## Random effects model NA      --      --
##
## Quantifying heterogeneity:
## tau^2 = NA; tau = NA; I^2 = NA; H = NA
##
## Details on meta-analytical method:
## - Mantel-Haenszel method
## - Inverse variance method
## - Restricted maximum-likelihood estimator for tau^2
```

### 8.16.2 Forest plot

```
forest(transfusion_metabin,
       sortvar = TE)
```

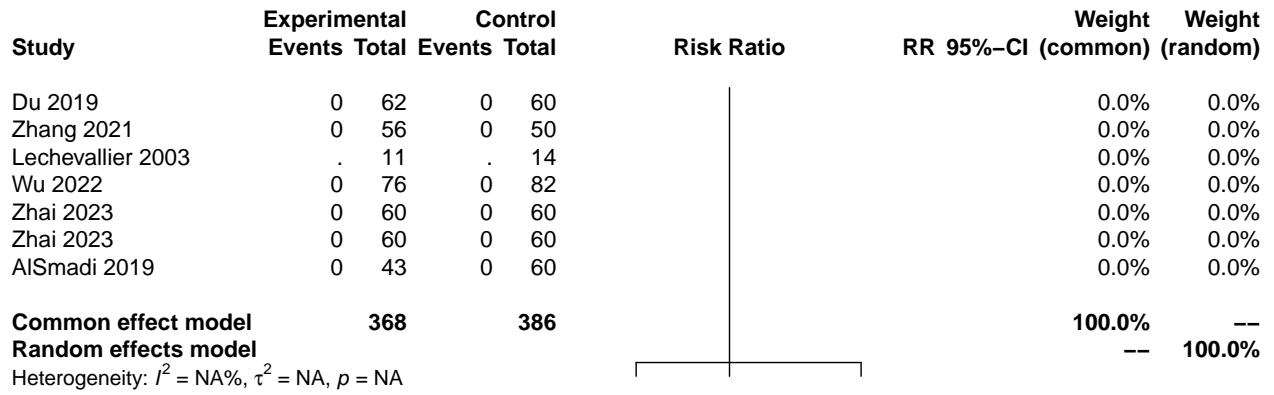

### 8.16.3 Trim and Fill

```
#trimfill(transfusion_metabin)  
#forest(trimfill(transfusion_metabin),  
#      sortvar = TE)
```

#### 8.16.4 Funnel plot

```
#funnel(trimfill(transfusion_metabin))
```

### 8.16.5 Baujat

```
#baujat(transfusion_metabin, pos = 1)
```

### 8.16.6 Leave one out

```
#metainf(transfusion_metabin)
```

## 8.17 Clavien I

### 8.17.1 Meta-analysis

```
clav_i_metabin <- metabin(data = semirigid_only,
                          event.c = clavien_i_n_control,
                          n.c = sample_size_control,
                          event.e = clavien_i_n_suction,
                          n.e = sample_size_suction,
                          studlab = author_year)

clav_i_metabin

## Number of studies: k = 3
## Number of observations: o = 754
## Number of events: e = 20
##
##              RR          95%-CI      z p-value
## Common effect model 0.6451 [0.2710; 1.5355] -0.99 0.3218
## Random effects model 0.6491 [0.2711; 1.5539] -0.97 0.3319
##
## Quantifying heterogeneity:
## tau^2 = 0 [0.0000; 2.8855]; tau = 0 [0.0000; 1.6987]
## I^2 = 0.0% [0.0%; 89.6%]; H = 1.00 [1.00; 3.10]
##
## Test of heterogeneity:
##      Q d.f. p-value
## 0.27   2 0.8726
##
## Details on meta-analytical method:
## - Mantel-Haenszel method
## - Inverse variance method
## - Restricted maximum-likelihood estimator for tau^2
## - Q-Profile method for confidence interval of tau^2 and tau
```



### 8.17.2 Forest plot

```
forest(clav_i_metabin,
       sortvar = TE)
```

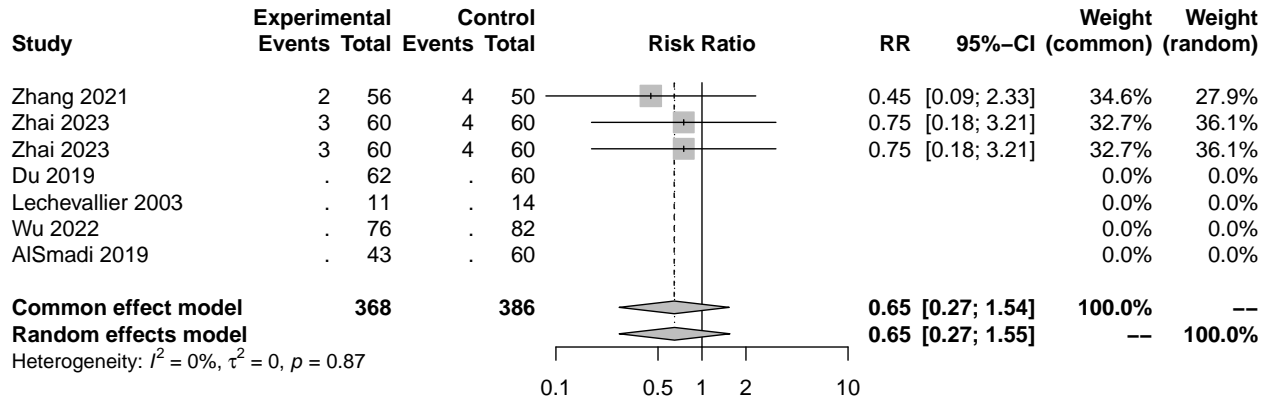

### 8.17.3 Trim and Fill

```
trimfill(clav_i_metabin)
```

```
## Warning in trimfill.meta(clav_i_metabin): 4 observation(s) dropped due to
## missing values

## Number of studies: k = 3 (with 0 added studies)
## Number of observations: o = 346
## Number of events: e = 20
##
##                RR          95%-CI      z p-value
## Random effects model 0.6491 [0.2711; 1.5539] -0.97 0.3319
##
## Quantifying heterogeneity:
## tau^2 = 0 [0.0000; 2.8855]; tau = 0 [0.0000; 1.6987]
## I^2 = 0.0% [0.0%; 89.6%]; H = 1.00 [1.00; 3.10]
##
## Test of heterogeneity:
##      Q d.f. p-value
## 0.27   2 0.8726
##
## Details on meta-analytical method:
## - Inverse variance method
## - Restricted maximum-likelihood estimator for tau^2
## - Q-Profile method for confidence interval of tau^2 and tau
## - Trim-and-fill method to adjust for funnel plot asymmetry (L-estimator)
```

```
forest(trimfill(clav_i_metabin),
        sortvar = TE)
```

```
## Warning in trimfill.meta(clav_i_metabin): 4 observation(s) dropped due to
## missing values
```

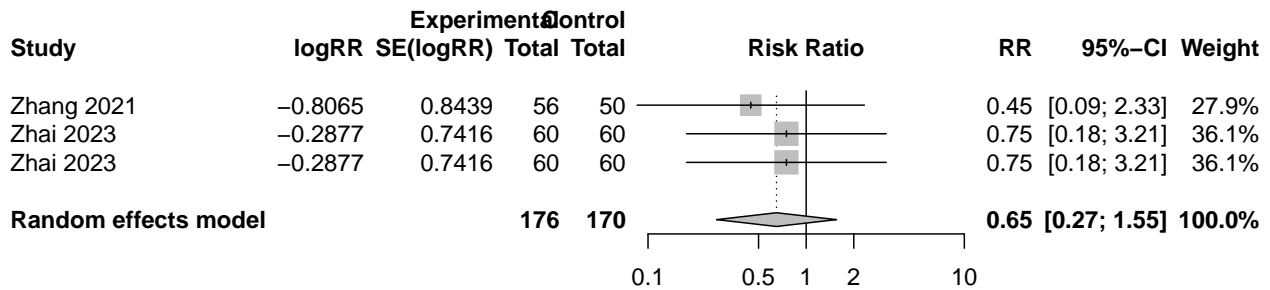

### 8.17.4 Funnel plot

```
funnel(trimfill(clav_i_metabin))
```

```
## Warning in trimfill.meta(clav_i_metabin): 4 observation(s) dropped due to  
## missing values
```

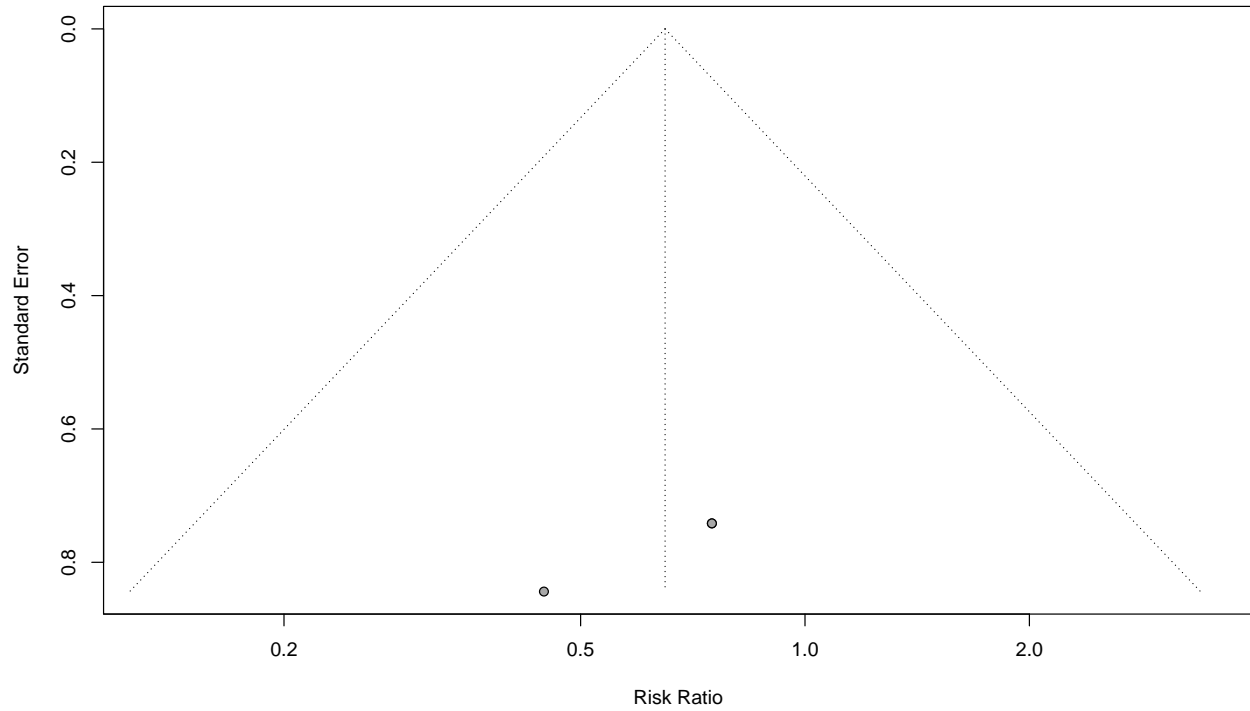

### 8.17.5 Baujat

```
baujat(clav_i_metabin, pos = 1)
```

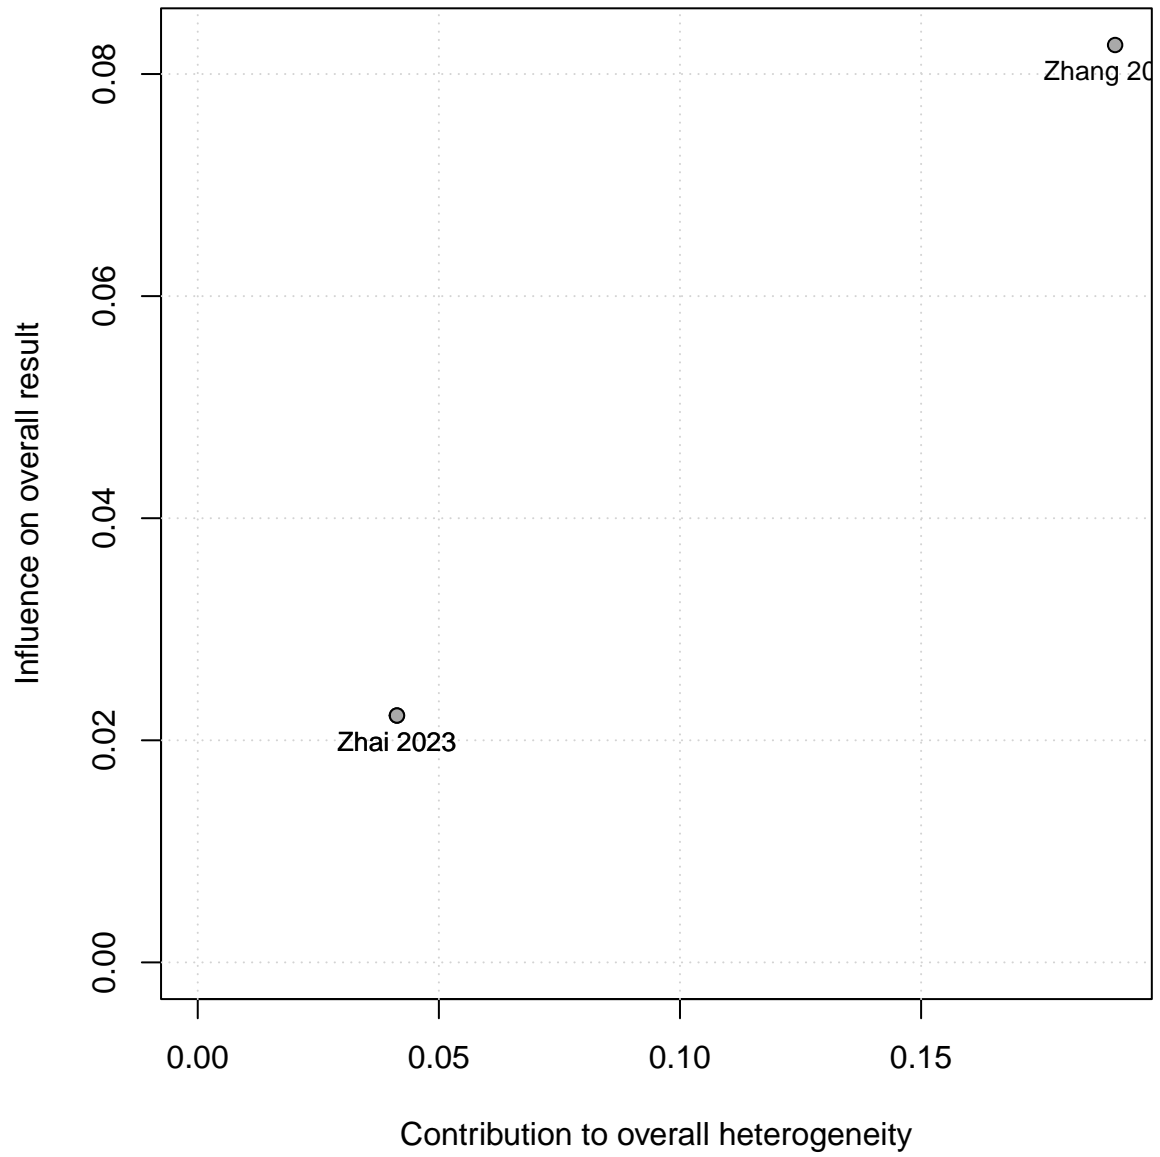

### 8.17.6 Leave one out

```
metainf(clav_i_metabin)
```

```
## Influential analysis (common effect model)
##
##
##          RR          95%-CI p-value  tau^2  tau
## Omitting Du 2019      0.6451 [0.2710; 1.5355]  0.3218  0.0000  0.0000
## Omitting Zhang 2021   0.7500 [0.2683; 2.0962]  0.5833  0.0000  0.0000
## Omitting Lechevallier 2003 0.6451 [0.2710; 1.5355]  0.3218  0.0000  0.0000
## Omitting Wu 2022      0.6451 [0.2710; 1.5355]  0.3218  0.0000  0.0000
## Omitting Zhai 2023    0.5940 [0.2011; 1.7549]  0.3460  0.0000  0.0000
## Omitting Zhai 2023    0.5940 [0.2011; 1.7549]  0.3460  0.0000  0.0000
## Omitting AlSmadi 2019  0.6451 [0.2710; 1.5355]  0.3218  0.0000  0.0000
##
## Pooled estimate      0.6451 [0.2710; 1.5355]  0.3218  0.0000  0.0000
##
##          I^2
## Omitting Du 2019      0.0%
## Omitting Zhang 2021   0.0%
## Omitting Lechevallier 2003 0.0%
## Omitting Wu 2022      0.0%
## Omitting Zhai 2023    0.0%
## Omitting Zhai 2023    0.0%
## Omitting AlSmadi 2019  0.0%
##
## Pooled estimate      0.0%
##
## Details on meta-analytical method:
## - Mantel-Haenszel method
## - Restricted maximum-likelihood estimator for tau^2
```

## 8.18 Clavien II

### 8.18.1 Meta-analysis

```
clav_ii_metabin <- metabin(data = semirigid_only,
                          event.c = clavien_ii_n_control,
                          n.c = sample_size_control,
                          event.e = clavien_ii_n_suction,
                          n.e = sample_size_suction,
                          studlab = author_year)

clav_ii_metabin

## Number of studies: k = 2
## Number of observations: o = 754
## Number of events: e = 4
##
##              RR          95%-CI    z p-value
## Common effect model 1.0000 [0.1432; 6.9836] 0.00 1.0000
## Random effects model 1.0000 [0.1432; 6.9836] 0.00 1.0000
##
## Quantifying heterogeneity:
## tau^2 = 0; tau = 0; I^2 = 0.0%; H = 1.00
##
## Test of heterogeneity:
##   Q d.f. p-value
## 0.00  1 1.0000
##
## Details on meta-analytical method:
## - Mantel-Haenszel method
## - Inverse variance method
## - Restricted maximum-likelihood estimator for tau^2
```

### 8.18.2 Forest plot

```
forest(clav_ii_metabin,
       sortvar = TE)
```

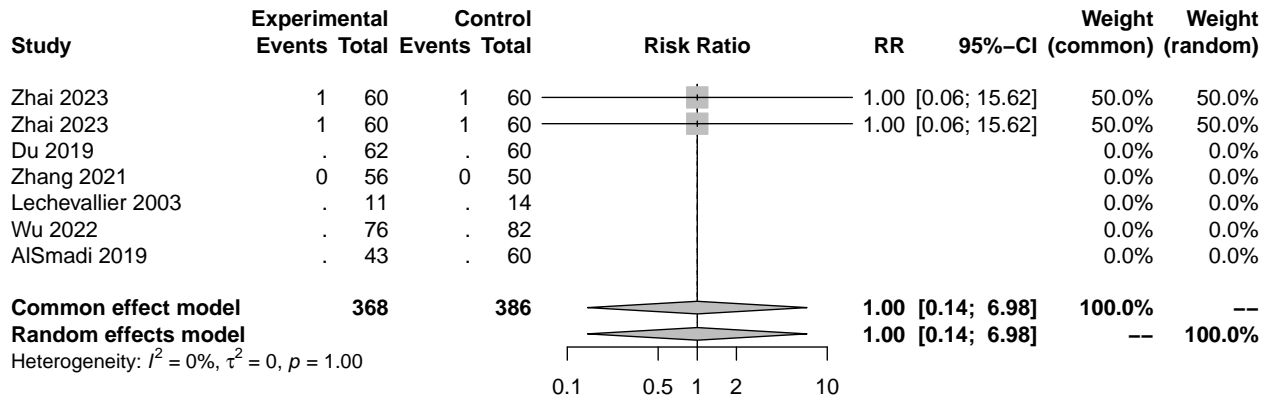

### 8.18.3 Trim and Fill

```
#trimfill(clav_ii_metabin)  
#forest(trimfill(clav_ii_metabin),  
#      sortvar = TE)
```



### 8.18.4 Funnel plot

```
funnel((clav_ii_metabin))
```

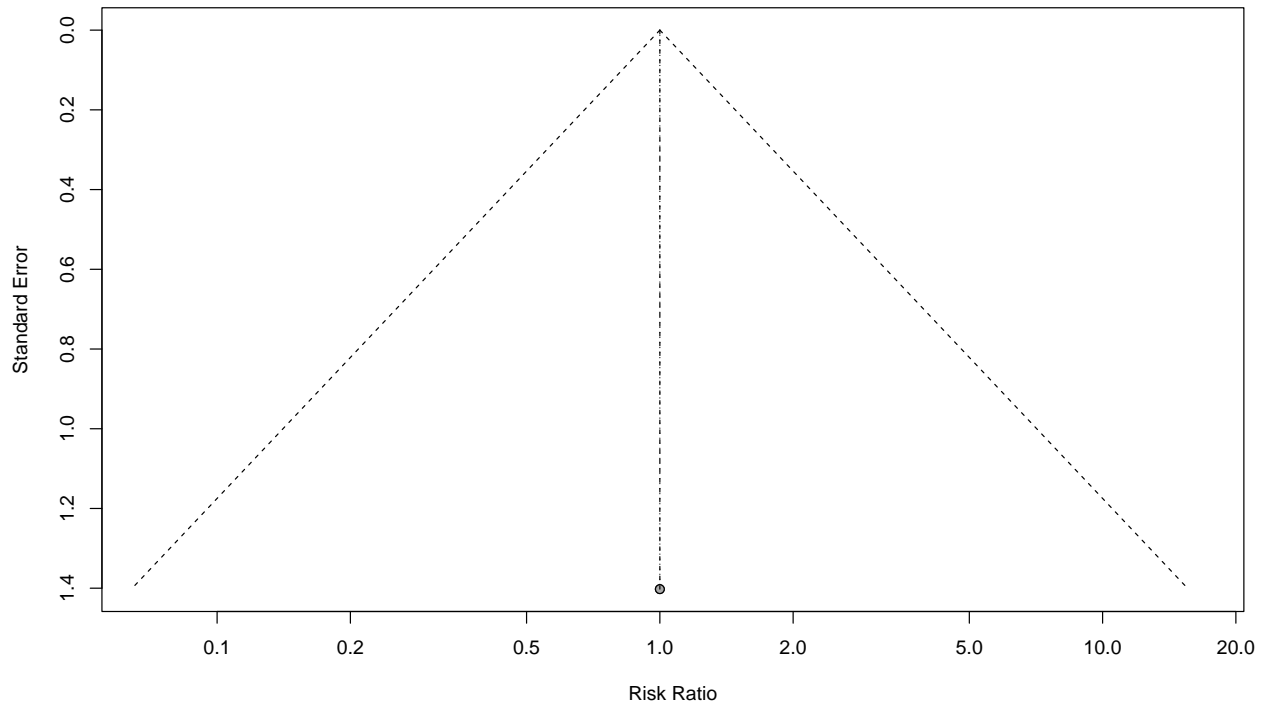

### 8.18.5 Baujat

```
baujat(clav_ii_metabin, pos = 1)
```

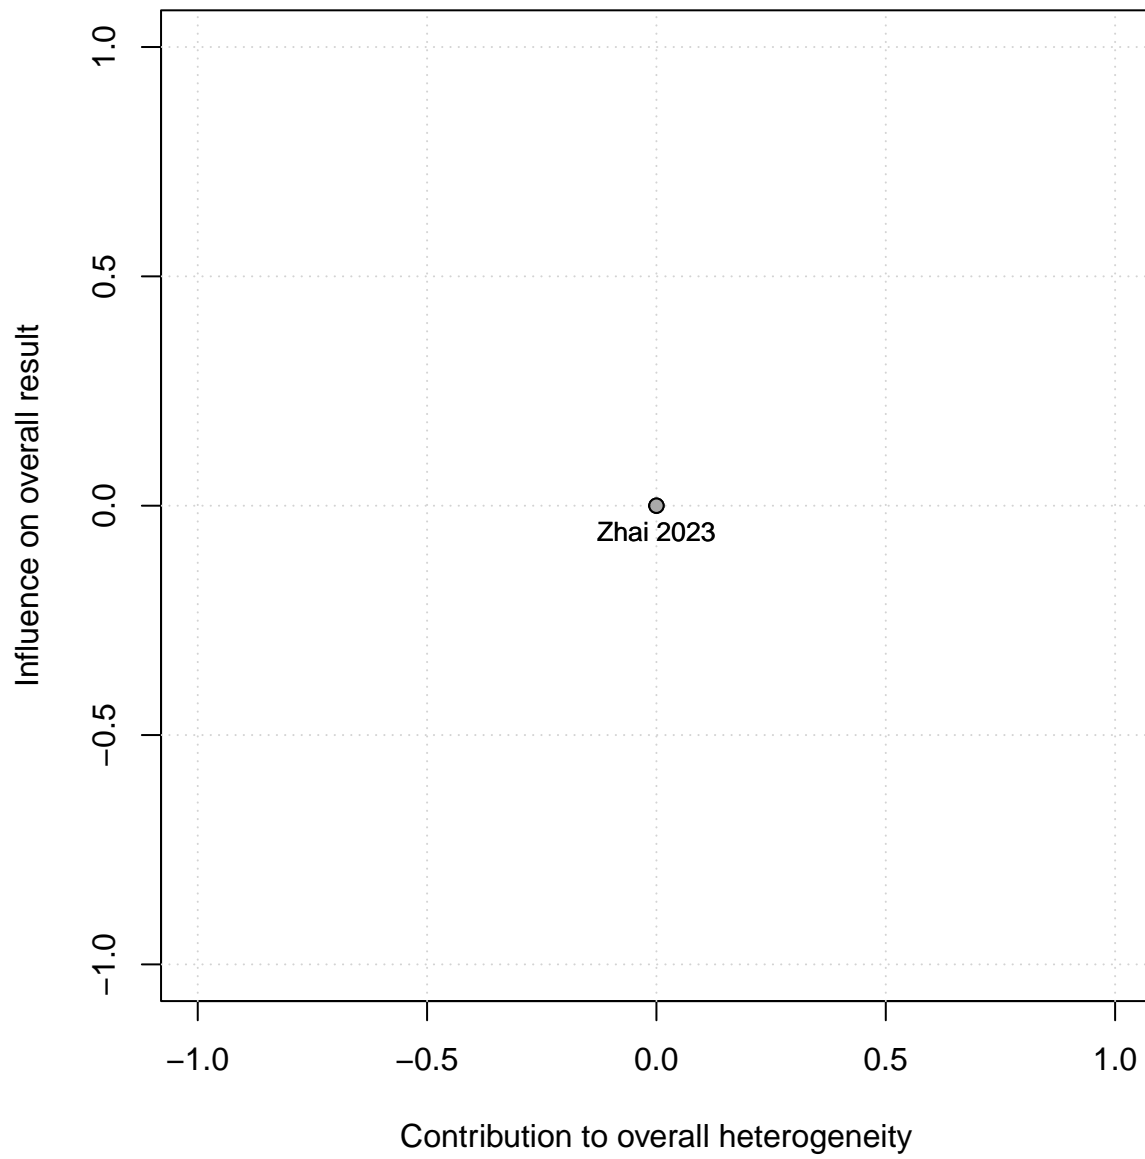

### 8.18.6 Leave one out

```
metainf(clav_ii_metabin)
```

```
## Influential analysis (common effect model)
##
##           RR           95%-CI p-value  tau^2    tau
## Omitting Du 2019      1.0000 [0.1432; 6.9836] 1.0000 0.0000 0.0000
## Omitting Zhang 2021  1.0000 [0.1432; 6.9836] 1.0000 0.0000 0.0000
## Omitting Lechevallier 2003 1.0000 [0.1432; 6.9836] 1.0000 0.0000 0.0000
## Omitting Wu 2022     1.0000 [0.1432; 6.9836] 1.0000 0.0000 0.0000
## Omitting Zhai 2023   1.0000 [0.0640; 15.6209] 1.0000
## Omitting Zhai 2023   1.0000 [0.0640; 15.6209] 1.0000
## Omitting AlSmadi 2019 1.0000 [0.1432; 6.9836] 1.0000 0.0000 0.0000
##
## Pooled estimate     1.0000 [0.1432; 6.9836] 1.0000 0.0000 0.0000
##
##           I^2
## Omitting Du 2019      0.0%
## Omitting Zhang 2021  0.0%
## Omitting Lechevallier 2003 0.0%
## Omitting Wu 2022     0.0%
## Omitting Zhai 2023   0.0%
## Omitting Zhai 2023   0.0%
## Omitting AlSmadi 2019 0.0%
##
## Pooled estimate     0.0%
##
## Details on meta-analytical method:
## - Mantel-Haenszel method
## - Restricted maximum-likelihood estimator for tau^2
```

## 8.19 Clavien III

### 8.19.1 Meta-analysis

```
clav_iii_metabin <- metabin(data = semirigid_only,
                             event.c = clavien_iii_n_control,
                             n.c = sample_size_control,
                             event.e = clavien_iii_n_suction,
                             n.e = sample_size_suction,
                             studlab = author_year)
```

```
clav_iii_metabin
```

```
## Number of studies: k = 0
## Number of observations: o = 754
## Number of events: e = 0
##
##                RR 95%-CI  z p-value
## Common effect model  NA      --      --
## Random effects model NA      --      --
##
## Quantifying heterogeneity:
## tau^2 = NA; tau = NA; I^2 = NA; H = NA
##
## Details on meta-analytical method:
## - Mantel-Haenszel method
## - Inverse variance method
## - Restricted maximum-likelihood estimator for tau^2
```

### 8.19.2 Forest plot

```
forest(clav_iii_metabin,
       sortvar = TE)
```

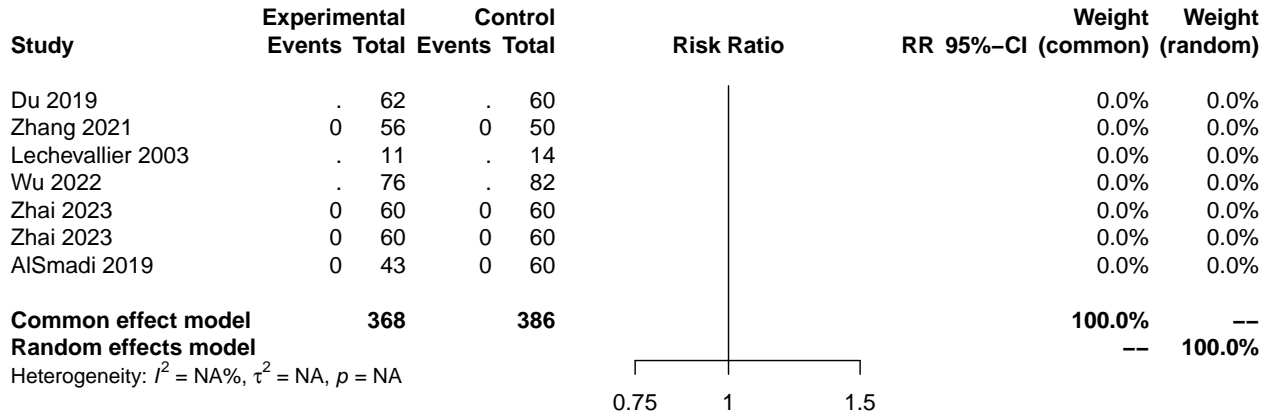

### 8.19.3 Trim and Fill

```
#trimfill(clav_iii_metabin)  
#forest(trimfill(clav_iii_metabin),  
#      sortvar = TE)
```

#### 8.19.4 Funnel plot

```
#funnel(trimfill(clav_iii_metabin))
```

### 8.19.5 Baujat

```
#baujat(clav_iii_metabin, pos = 1)
```



### 8.19.6 Leave one out

```
#metainf(clav_iii_metabin)
```

## 8.20 Clavien IV

### 8.20.1 Meta-analysis

```
clav_iv_metabin <- metabin(data = semirigid_only,
                          event.c = clavien_iv_n_control,
                          n.c = sample_size_control,
                          event.e = clavien_iv_n_suction,
                          n.e = sample_size_suction,
                          studlab = author_year)
```

```
clav_iv_metabin
```

```
## Number of studies: k = 0
## Number of observations: o = 754
## Number of events: e = 0
##
##                RR 95%-CI  z p-value
## Common effect model  NA      --      --
## Random effects model NA      --      --
##
## Quantifying heterogeneity:
## tau^2 = NA; tau = NA; I^2 = NA; H = NA
##
## Details on meta-analytical method:
## - Mantel-Haenszel method
## - Inverse variance method
## - Restricted maximum-likelihood estimator for tau^2
```

### 8.20.2 Forest plot

```
forest(clav_iv_metabin,
       sortvar = TE)
```



### 8.20.3 Trim and Fill

```
#trimfill(clav_iv_metabin)  
#forest(trimfill(clav_iv_metabin),  
#      sortvar = TE)
```

#### 8.20.4 Funnel plot

```
#funnel((clav_iv_metabin))
```

### 8.20.5 Baujat

```
#baujat(clav_iv_metabin, pos = 1)
```

### 8.20.6 Leave one out

```
#metainf(clav_iv_metabin)
```

## 8.21 Clavien V

### 8.21.1 Meta-analysis

```
clav_v_metabin <- metabin(data = semirigid_only,
                          event.c = clavien_v_n_control,
                          n.c = sample_size_control,
                          event.e = clavien_v_n_suction,
                          n.e = sample_size_suction,
                          studlab = author_year)
```

```
clav_v_metabin
```

```
## Number of studies: k = 0
## Number of observations: o = 754
## Number of events: e = 0
##
##                RR 95%-CI  z p-value
## Common effect model  NA      --      --
## Random effects model NA      --      --
##
## Quantifying heterogeneity:
## tau^2 = NA; tau = NA; I^2 = NA; H = NA
##
## Details on meta-analytical method:
## - Mantel-Haenszel method
## - Inverse variance method
## - Restricted maximum-likelihood estimator for tau^2
```



### 8.21.2 Forest plot

```
#forest(clav_v_metabin,  
#       sortvar = TE)
```

### 8.21.3 Trim and Fill

```
#trimfill(clav_v_metabin)  
#forest(trimfill(clav_v_metabin),  
#      sortvar = TE)
```

#### 8.21.4 Funnel plot

```
#funnel(trimfill(clav_v_metabin))
```

### 8.21.5 Baujat

```
#baujat(clav_v_metabin, pos = 1)
```

### 8.21.6 Leave one out

```
#metainf(clav_v_metabin)
```

## 8.22 Clavien I-II

### 8.22.1 Meta-analysis

```
clav_i_ii_metabin <- metabin(data = semirigid_only,
                             event.c = clav_i_ii_n_control,
                             n.c = sample_size_control,
                             event.e = clav_i_ii_n_suction,
                             n.e = sample_size_suction,
                             studlab = author_year)

clav_i_ii_metabin

## Number of studies: k = 3
## Number of observations: o = 754
## Number of events: e = 24
##
##              RR          95%-CI      z p-value
## Common effect model 0.6950 [0.3182; 1.5179] -0.91 0.3613
## Random effects model 0.7011 [0.3192; 1.5399] -0.88 0.3763
##
## Quantifying heterogeneity:
## tau^2 = 0 [0.0000; 3.8664]; tau = 0 [0.0000; 1.9663]
## I^2 = 0.0% [0.0%; 89.6%]; H = 1.00 [1.00; 3.10]
##
## Test of heterogeneity:
##      Q d.f. p-value
## 0.37   2 0.8312
##
## Details on meta-analytical method:
## - Mantel-Haenszel method
## - Inverse variance method
## - Restricted maximum-likelihood estimator for tau^2
## - Q-Profile method for confidence interval of tau^2 and tau
```

### 8.22.2 Forest plot

```
forest(clav_i_ii_metabin,
       sortvar = TE)
```

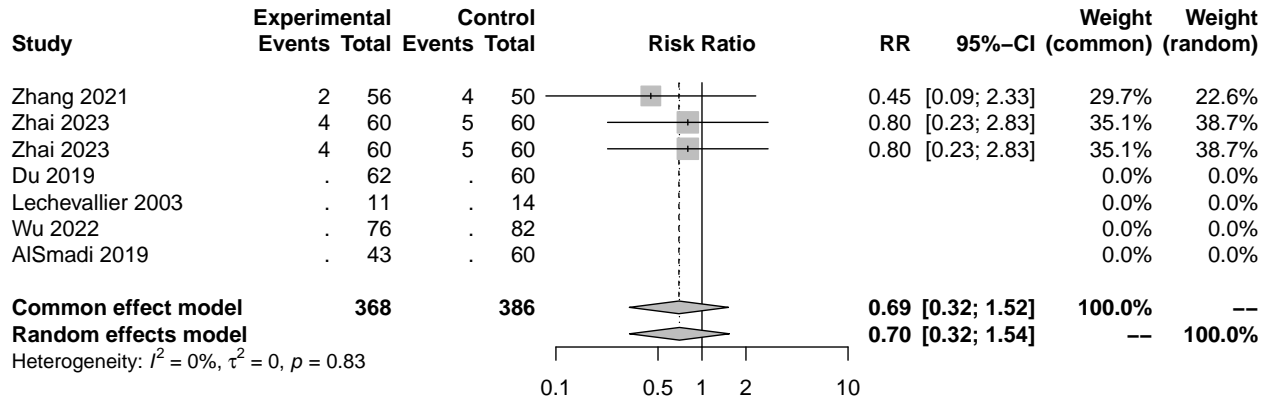

### 8.22.3 Trim and Fill

```
trimfill(clav_i_ii_metabin)
```

```
## Warning in trimfill.meta(clav_i_ii_metabin): 4 observation(s) dropped due to
## missing values
```

```
## Number of studies: k = 3 (with 0 added studies)
```

```
## Number of observations: o = 346
```

```
## Number of events: e = 24
```

```
##
```

```
##              RR          95%-CI      z p-value
## Random effects model 0.7011 [0.3192; 1.5399] -0.88 0.3763
```

```
##
```

```
## Quantifying heterogeneity:
```

```
## tau^2 = 0 [0.0000; 3.8664]; tau = 0 [0.0000; 1.9663]
```

```
## I^2 = 0.0% [0.0%; 89.6%]; H = 1.00 [1.00; 3.10]
```

```
##
```

```
## Test of heterogeneity:
```

```
##      Q d.f. p-value
```

```
## 0.37   2 0.8312
```

```
##
```

```
## Details on meta-analytical method:
```

```
## - Inverse variance method
```

```
## - Restricted maximum-likelihood estimator for tau^2
```

```
## - Q-Profile method for confidence interval of tau^2 and tau
```

```
## - Trim-and-fill method to adjust for funnel plot asymmetry (L-estimator)
```

```
forest(trimfill(clav_i_ii_metabin),
        sortvar = TE)
```

```
## Warning in trimfill.meta(clav_i_ii_metabin): 4 observation(s) dropped due to
## missing values
```

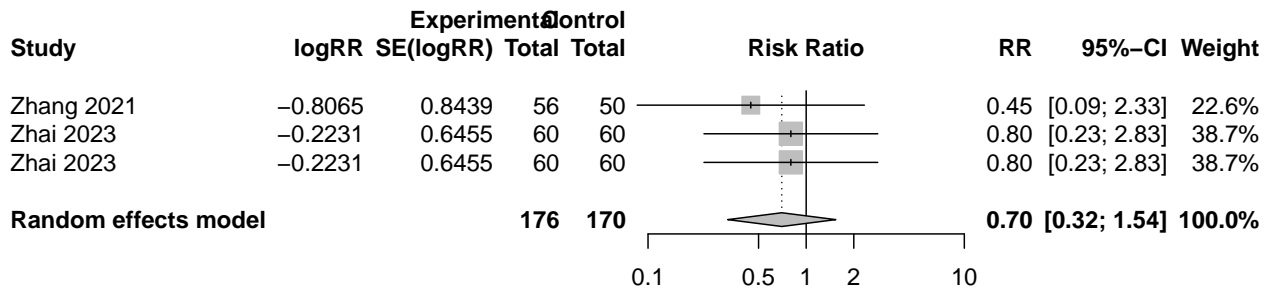



### 8.22.4 Funnel plot

```
funnel(trimfill(clav_i_ii_metabin))
```

```
## Warning in trimfill.meta(clav_i_ii_metabin): 4 observation(s) dropped due to  
## missing values
```

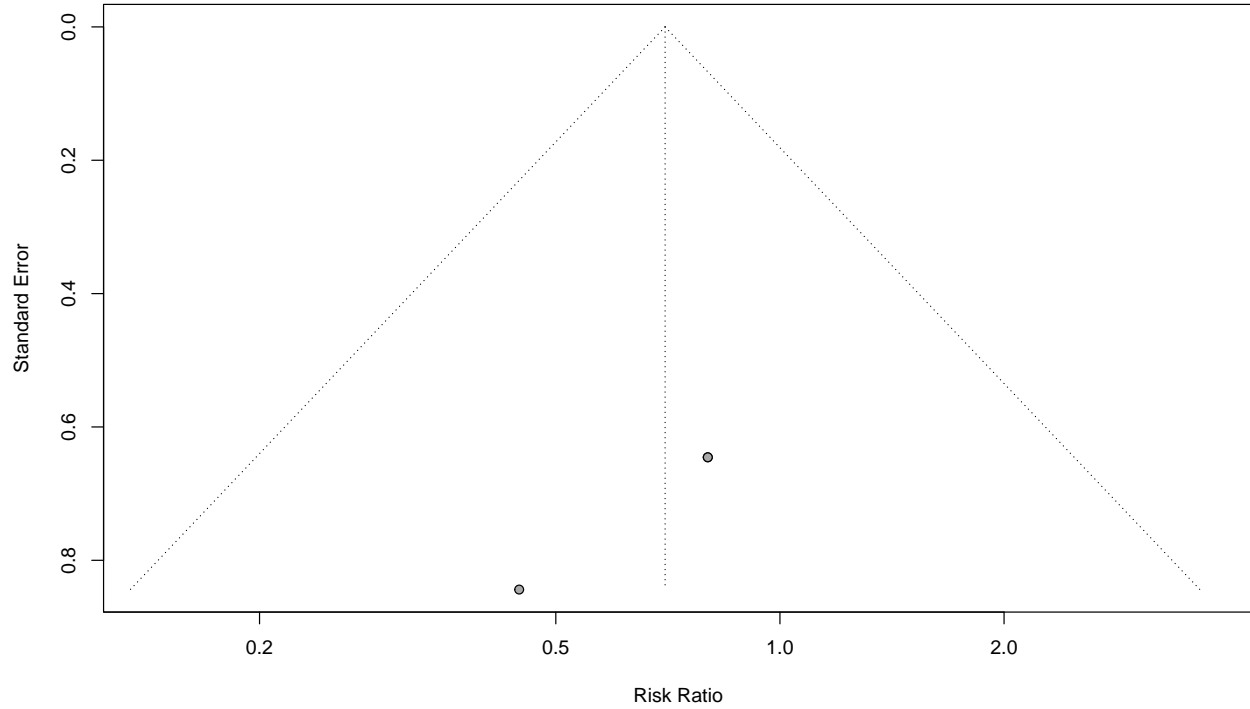

### 8.22.5 Baujat

```
baujat(clav_i_ii_metabin, pos = 1)
```

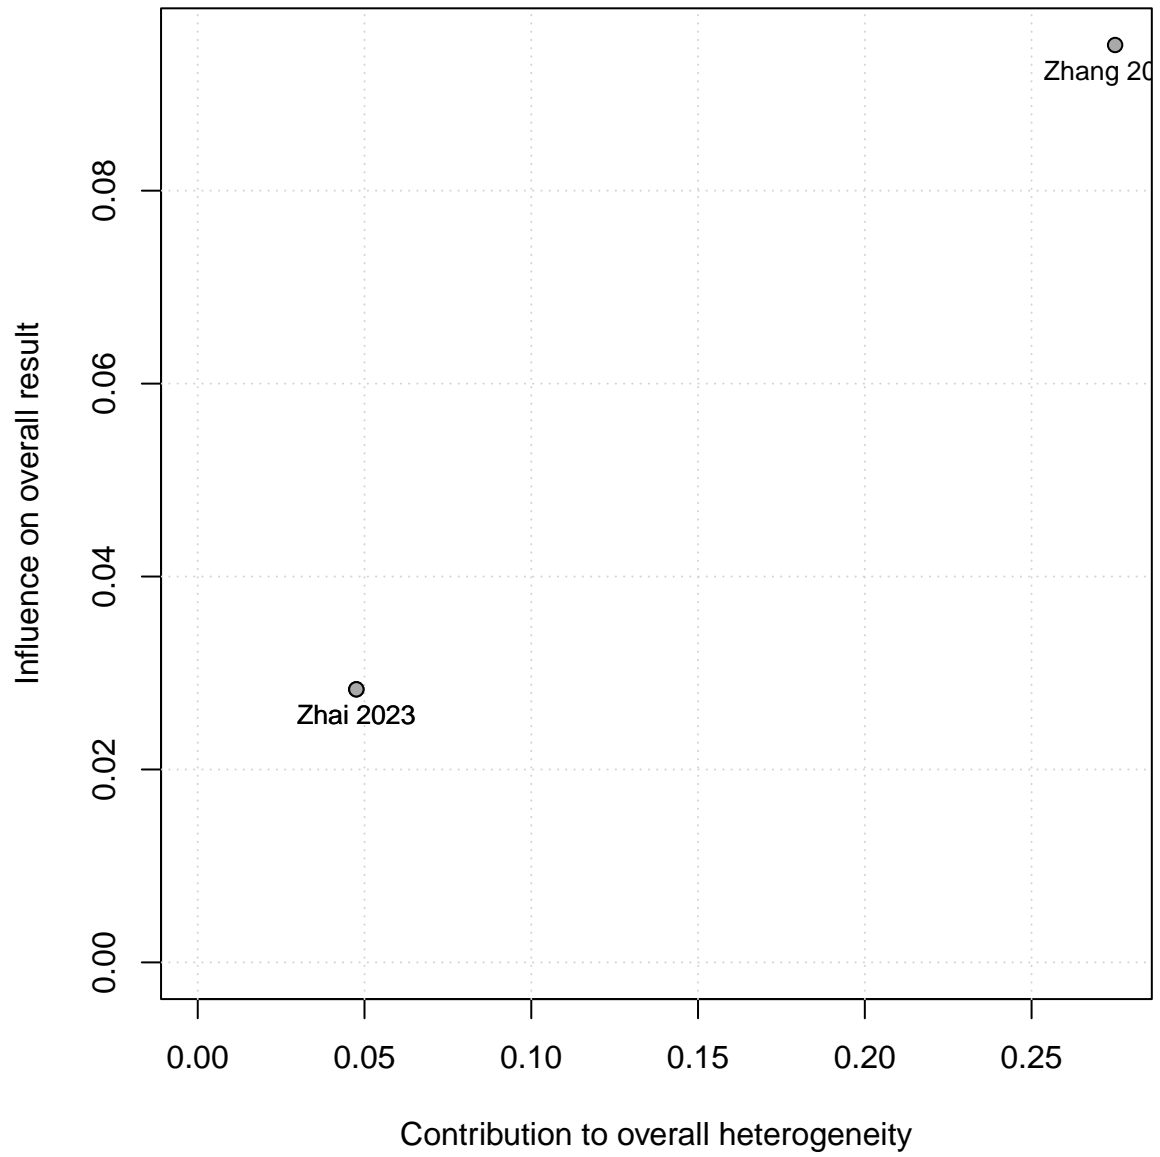

### 8.22.6 Leave one out

```
metainf(clav_i_ii_metabin)
```

```
## Influential analysis (common effect model)
##
##           RR           95%-CI p-value   tau^2   tau
## Omitting Du 2019      0.6950 [0.3182; 1.5179] 0.3613 0.0000 0.0000
## Omitting Zhang 2021   0.8000 [0.3270; 1.9571] 0.6249 0.0000 0.0000
## Omitting Lechevallier 2003 0.6950 [0.3182; 1.5179] 0.3613 0.0000 0.0000
## Omitting Wu 2022      0.6950 [0.3182; 1.5179] 0.3613 0.0000 0.0000
## Omitting Zhai 2023    0.6380 [0.2358; 1.7266] 0.3763 0.0000 0.0000
## Omitting Zhai 2023    0.6380 [0.2358; 1.7266] 0.3763 0.0000 0.0000
## Omitting AlSmadi 2019 0.6950 [0.3182; 1.5179] 0.3613 0.0000 0.0000
##
## Pooled estimate      0.6950 [0.3182; 1.5179] 0.3613 0.0000 0.0000
##           I^2
## Omitting Du 2019      0.0%
## Omitting Zhang 2021   0.0%
## Omitting Lechevallier 2003 0.0%
## Omitting Wu 2022      0.0%
## Omitting Zhai 2023    0.0%
## Omitting Zhai 2023    0.0%
## Omitting AlSmadi 2019 0.0%
##
## Pooled estimate      0.0%
##
## Details on meta-analytical method:
## - Mantel-Haenszel method
## - Restricted maximum-likelihood estimator for tau^2
```

## 8.23 Clavien III-V

### 8.23.1 Meta-analysis

```
clav_iii_v_metabin <- metabin(data = semirigid_only,
                             event.c = clav_iii_v_n_control,
                             n.c = sample_size_control,
                             event.e = clav_iii_v_n_suction,
                             n.e = sample_size_suction,
                             studlab = author_year)
```

```
clav_iii_v_metabin
```

```
## Number of studies: k = 0
## Number of observations: o = 754
## Number of events: e = 0
##
##                RR 95%-CI  z p-value
## Common effect model  NA      --      --
## Random effects model NA      --      --
##
## Quantifying heterogeneity:
## tau^2 = NA; tau = NA; I^2 = NA; H = NA
##
## Details on meta-analytical method:
## - Mantel-Haenszel method
## - Inverse variance method
## - Restricted maximum-likelihood estimator for tau^2
```

### 8.23.2 Forest plot

```
forest(clav_iii_v_metabin,
       sortvar = TE)
```



### 8.23.3 Trim and Fill

```
#trimfill(clav_iii_v_metabin)  
#forest(trimfill(clav_iii_v_metabin),  
#      sortvar = TE)
```

#### 8.23.4 Funnel plot

```
#funnel(trimfill(clav_iii_v_metabin))
```

### 8.23.5 Baujat

```
#baujat(clav_iii_v_metabin, pos = 1)
```



### 8.23.6 Leave one out

```
#metainf(clav_iii_v_metabin)
```



```

    sfr_metabin$k,
    aux_rx_metabin$k,
    comp_metabin$k,
    fever_metabin$k,
    infection_metabin$k,
    sepsis_metabin$k,
    abscess_metabin$k,
    haematoma_metabin$k,
    pain_metabin$k,
    stricture_metabin$k,
    ir_embolisation_metabin$k,
    transfusion_metabin$k,
    clav_i_metabin$k,
    clav_ii_metabin$k,
    clav_iii_metabin$k,
    clav_iv_metabin$k,
    clav_i_ii_metabin$k,
    clav_iii_v_metabin$k,
    or_time_metacont$k,
    vas_metacont$k,
    los_metacont$k),
"es" = c(
    immediate_sfr_metabin$TE.random %>% exp(),
    sfr_metabin$TE.random %>% exp(),
    aux_rx_metabin$TE.random %>% exp(),
    comp_metabin$TE.random %>% exp(),
    fever_metabin$TE.random %>% exp(),
    infection_metabin$TE.random %>% exp(),
    sepsis_metabin$TE.random %>% exp(),
    abscess_metabin$TE.random %>% exp(),
    haematoma_metabin$TE.random %>% exp(),
    pain_metabin$TE.random %>% exp(),
    stricture_metabin$TE.random %>% exp(),
    ir_embolisation_metabin$TE.random %>% exp(),
    transfusion_metabin$TE.random %>% exp(),
    clav_i_metabin$TE.random %>% exp(),
    clav_ii_metabin$TE.random %>% exp(),
    clav_iii_metabin$TE.random %>% exp(),
    clav_iv_metabin$TE.random %>% exp(),
    clav_i_ii_metabin$TE.random %>% exp(),
    clav_iii_v_metabin$TE.random %>% exp(),
    or_time_metacont$TE.random,
    vas_metacont$TE.random,
    los_metacont$TE.random),
"lower_ci" = c(
    immediate_sfr_metabin$lower.random %>% exp(),
    sfr_metabin$lower.random %>% exp(),
    aux_rx_metabin$lower.random %>% exp(),
    comp_metabin$lower.random %>% exp(),
    fever_metabin$lower.random %>% exp(),
    infection_metabin$lower.random %>% exp(),
    sepsis_metabin$lower.random %>% exp(),
    abscess_metabin$lower.random %>% exp(),

```

```

haematoma_metabin$lower.random %>% exp(),
pain_metabin$lower.random %>% exp(),
stricture_metabin$lower.random %>% exp(),
ir_embolisation_metabin$lower.random %>% exp(),
transfusion_metabin$lower.random %>% exp(),
clav_i_metabin$lower.random %>% exp(),
clav_ii_metabin$lower.random %>% exp(),
clav_iii_metabin$lower.random %>% exp(),
clav_iv_metabin$lower.random %>% exp(),
clav_i_ii_metabin$lower.random %>% exp(),
clav_iii_v_metabin$lower.random %>% exp(),
or_time_metacont$lower.random,
vas_metacont$lower.random,
los_metacont$lower.random),
"upper_ci" = c(immediate_sfr_metabin$upper.random %>% exp(),
               sfr_metabin$upper.random %>% exp(),
               aux_rx_metabin$upper.random %>% exp(),
               comp_metabin$upper.random %>% exp(),
               fever_metabin$upper.random %>% exp(),
               infection_metabin$upper.random %>% exp(),
               sepsis_metabin$upper.random %>% exp(),
               abscess_metabin$upper.random %>% exp(),
               haematoma_metabin$upper.random %>% exp(),
               pain_metabin$upper.random %>% exp(),
               stricture_metabin$upper.random %>% exp(),
               ir_embolisation_metabin$upper.random %>% exp(),
               transfusion_metabin$upper.random %>% exp(),
               clav_i_metabin$upper.random %>% exp(),
               clav_ii_metabin$upper.random %>% exp(),
               clav_iii_metabin$upper.random %>% exp(),
               clav_iv_metabin$upper.random %>% exp(),
               clav_i_ii_metabin$upper.random %>% exp(),
               clav_iii_v_metabin$upper.random %>% exp(),
               or_time_metacont$upper.random,
               vas_metacont$upper.random,
               los_metacont$upper.random),
"p" = c(
  immediate_sfr_metabin$pval.random,
  sfr_metabin$pval.random,
  aux_rx_metabin$pval.random,
  comp_metabin$pval.random,
  fever_metabin$pval.random,
  infection_metabin$pval.random,
  sepsis_metabin$pval.random,
  abscess_metabin$pval.random,
  haematoma_metabin$pval.random,
  pain_metabin$pval.random,
  stricture_metabin$pval.random,
  ir_embolisation_metabin$pval.random,
  transfusion_metabin$pval.random,
  clav_i_metabin$pval.random,
  clav_ii_metabin$pval.random,
  clav_iii_metabin$pval.random,

```

```

clav_iv_metabin$pval.random,
clav_i_ii_metabin$pval.random,
clav_iii_v_metabin$pval.random,
or_time_metacont$pval.random,
vas_metacont$pval.random,
los_metacont$pval.random)) %>% as_tibble() %>% drop_na(es)

overall$es <- as.numeric(overall$es)
overall$es <- round(overall$es, digits = 2)

overall$lower_ci <- as.numeric(overall$lower_ci)
overall$lower_ci <- round(overall$lower_ci, digits = 2)

overall$upper_ci <- as.numeric(overall$upper_ci)
overall$upper_ci <- round(overall$upper_ci, digits = 2)

overall$p <- as.numeric(overall$p)
overall$p <- round(overall$p, digits = 2)
overall$p <- ifelse(overall$p<0.001, "<0.001", overall$p)

```

## 9.1 Summary Table of number of studies for each outcome included in meta-analysis

```
overall %>% subset(select = c(Outcome, n_studies)) %>% gt() %>% tab_header(title = "Summary table of Nu
```

Summary table of Number of Studies for Each Outcome Meta-Analysis

| Outcome               | Studies, n |
|-----------------------|------------|
| Immediate SFR         | 9          |
| Final SFR             | 6          |
| Auxiliary Treatment   | 5          |
| Overall Complications | 6          |
| Fever                 | 3          |
| Infection             | 3          |
| Pain                  | 1          |
| Stricture             | 1          |
| CD I                  | 3          |
| CD II                 | 2          |
| CD I-II               | 3          |
| Operative time        | 7          |
| Length of Stay        | 4          |

## 9.2 Summary Forest plot of Continuous outcomes

### 9.2.1 Continuous Outcomes Table

md = mean difference lb = lower bound of 95% confidence interval ub = upper bound of 95% confidence interval tf = trim and fill

```
overall_continuous <-  
  overall %>% subset(type == "cont") %>% subset(select = c(Outcome,  
                                                         n_studies,  
                                                         es,  
                                                         lower_ci,  
                                                         upper_ci,  
                                                         p)) %>% as_tibble()  
overall_continuous %>% gt() %>% tab_header(title = "Summary Table for Continuous Outcomes") %>% cols_me
```

Summary Table for Continuous Outcomes

| Outcome        | Studies, n | MD (95% CI)         | p    |
|----------------|------------|---------------------|------|
| Operative time | 7          | -6.87 (-14.07-0.33) | 0.06 |
| Length of Stay | 4          | -0.29 (-0.55-0.03)  | 0.03 |

## 9.2.2 Continuous Forest plot

```

continuous_plot <- overall_continuous %>%
  forestplot(
    mean = es,
    lower = lower_ci,
    upper = upper_ci,
    labeltext = c(Outcome, n_studies, es, lower_ci, upper_ci, p),
    zero = 0,
    vertices = TRUE,
    title = "A. Forest plot of MA Outcomes for Continuous Outcomes",
    clip = c(-4, 2),
    xlab = "MD [95% CI]",
    graph.pos = 3
  ) %>% fp_set_style(
    box = c("black"),
    line = "black",
    txt_gp = fpTxtGp(
      ticks = gpar(fontfamily = "", cex = 1),
      xlab = gpar(fontfamily = "", cex = 1)
    ) %>% fp_add_lines("steelblue") %>%
    fp_add_header("Outcome",
      "Studies, n",
      "MD",
      "[ 95%", " CI ]",
      "P-Value") %>% fp_decorate_graph(box = TRUE) %>% fp_set_zebra_style("#EFEFEF")
continuous_plot

```

**A. Forest plot of MA Outcomes for Continuous Outcomes**

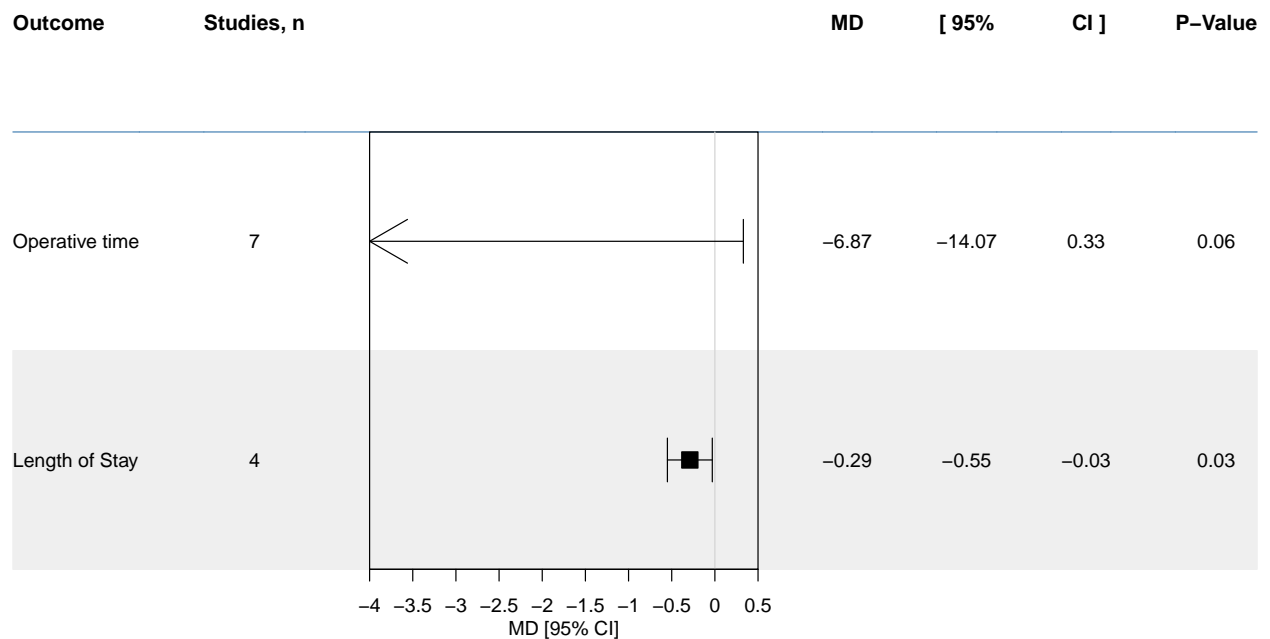



### 9.3 Summary Forest plot of Binary outcomes

### 9.3.1 Binary Outcomes Table

md = mean difference lb = lower bound of 95% confidence interval ub = upper bound of 95% confidence interval tf = trim and fill

```
overall_binary <-  
  overall %>% subset(type == "binary") %>% subset(select = c(Outcome,  
                                                             n_studies,  
                                                             es,  
                                                             lower_ci,  
                                                             upper_ci,  
                                                             p)) %>% as_tibble()  
overall_binary %>% gt() %>% tab_header(title = "Summary Table for Binary Outcomes") %>% cols_merge(colum
```

Summary Table for Binary Outcomes

| Outcome               | Studies, n | RR (95% CI)      | p      |
|-----------------------|------------|------------------|--------|
| Immediate SFR         | 9          | 1.15 (0.99-1.34) | 0.08   |
| Final SFR             | 6          | 1.16 (1.07-1.25) | <0.001 |
| Auxiliary Treatment   | 5          | 0.57 (0.13-2.40) | 0.44   |
| Overall Complications | 6          | 0.45 (0.25-0.83) | 0.01   |
| Fever                 | 3          | 0.29 (0.12-0.72) | 0.01   |
| Infection             | 3          | 0.29 (0.12-0.72) | 0.01   |
| Pain                  | 1          | 0.30 (0.01-7.15) | 0.46   |
| Stricture             | 1          | 0.14 (0.01-2.62) | 0.19   |
| CD I                  | 3          | 0.65 (0.27-1.55) | 0.33   |
| CD II                 | 2          | 1.00 (0.14-6.98) | 1      |
| CD I-II               | 3          | 0.70 (0.32-1.54) | 0.38   |

### 9.3.2 Binary Forest plot - Meta-Analysis

Reference = No Suction

```
binary_plot <- overall_binary %>%
  forestplot(
    mean = es,
    lower = lower_ci,
    upper = upper_ci,
    labeltext = c(Outcome, n_studies, es, lower_ci, upper_ci, p),
    zero = 1,
    vertices = TRUE,
    title = "A. Forest plot of MA Outcomes for Binary Outcomes",
    clip = c(-1.5, 1.5),
    xlab = "RR [95% CI]",
    graph.pos = 3
  ) %>% fp_set_style(
    box = c("black"),
    line = "black",
    txt_gp = fpTxtGp(
      ticks = gpar(fontfamily = "", cex = 1),
      xlab = gpar(fontfamily = "", cex = 1)
    )
  ) %>% fp_add_lines("steelblue") %>%
  fp_add_header("Outcome",
    "Studies, n",
    "RR",
    "[ 95%", " CI ]",
    "P-Value") %>% fp_decorate_graph(box = TRUE) %>% fp_set_zebra_style("#EFEFEF")
binary_plot
```

A. Forest plot of MA Outcomes for Binary Outcomes

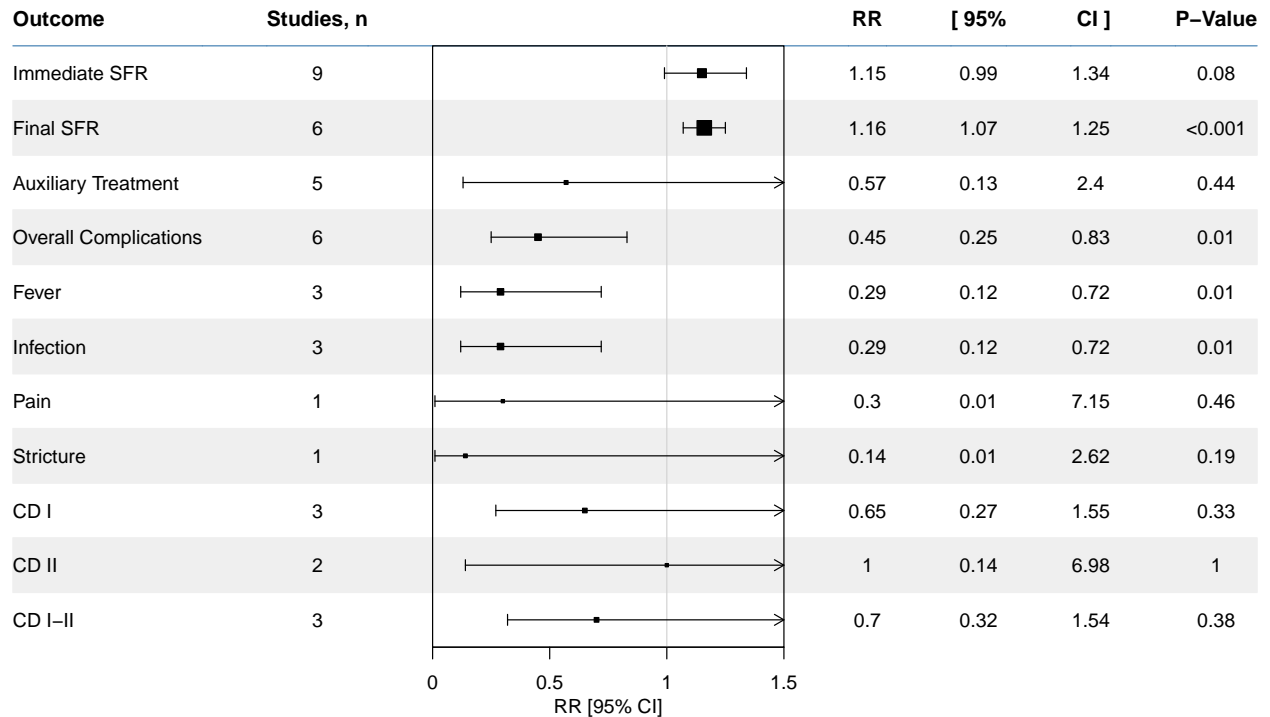

## 10 Flexi URS Only Meta-Analysis Outcomes

```
flexiurs_only <- suction_data %>% subset(control_group == "Flexible URS")
```

## 10.1 Immediate SFR

### 10.1.1 Meta-analysis

```
immediate_sfr_metabin <- metabin(data = suction_data,
                                event.c = sfr_immediate_n_control,
                                n.c = sample_size_control,
                                event.e = sfr_immediate_n_suction,
                                n.e = sample_size_suction,
                                studlab = author_year)

immediate_sfr_metabin

## Number of studies: k = 9
## Number of observations: o = 2311
## Number of events: e = 979
##
##              RR          95%-CI    z  p-value
## Common effect model  1.1581 [1.0834; 1.2380] 4.31 < 0.0001
## Random effects model  1.1478 [0.9854; 1.3370] 1.77  0.0765
##
## Quantifying heterogeneity:
## tau^2 = 0.0365 [0.0088; 0.2318]; tau = 0.1910 [0.0939; 0.4814]
## I^2 = 74.6% [50.9%; 86.9%]; H = 1.99 [1.43; 2.76]
##
## Test of heterogeneity:
##      Q d.f. p-value
## 31.55  8  0.0001
##
## Details on meta-analytical method:
## - Mantel-Haenszel method
## - Inverse variance method
## - Restricted maximum-likelihood estimator for tau^2
## - Q-Profile method for confidence interval of tau^2 and tau
```

### 10.1.2 Forest plot

```
forest(immediate_sfr_metabin,
       sortvar = TE)
```

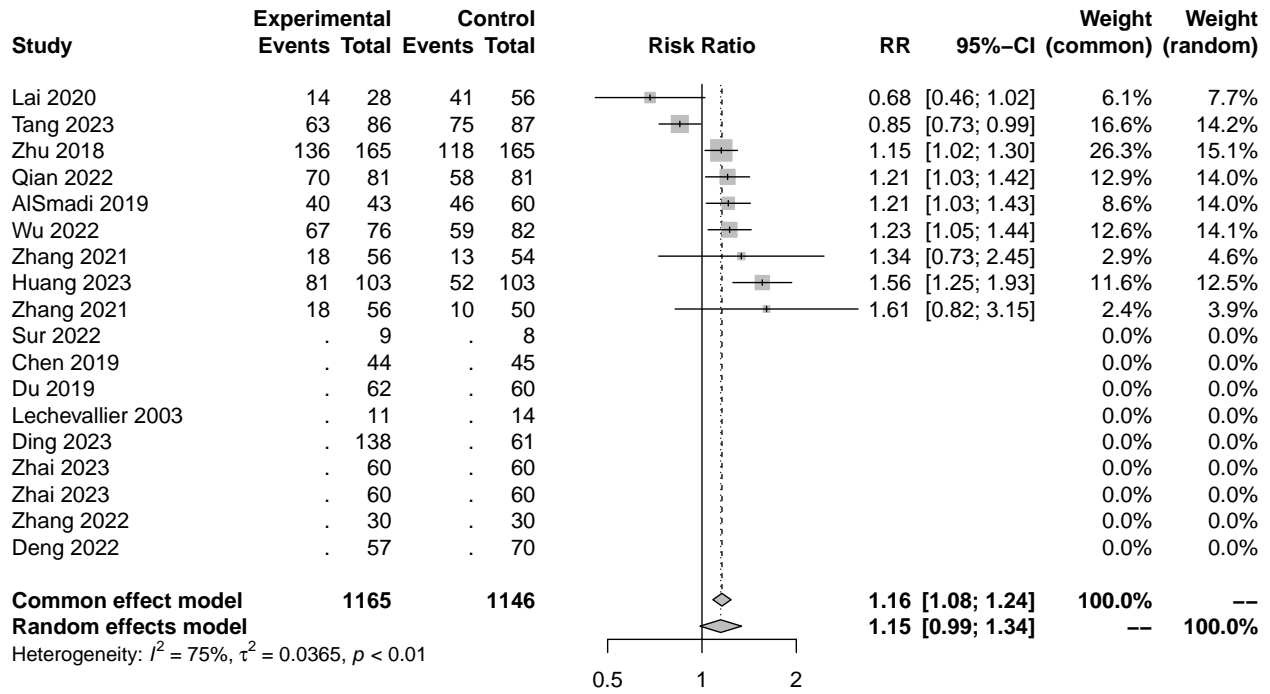

### 10.1.3 Trim and Fill

```
trimfill(immediate_sfr_metabin)
```

```
## Warning in trimfill.meta(immediate_sfr_metabin): 9 observation(s) dropped due
## to missing values

## Number of studies: k = 11 (with 2 added studies)
## Number of observations: o = 1744
## Number of events: e = 1140
##
##                      RR          95%-CI    z p-value
## Random effects model 1.0855 [0.9289; 1.2685] 1.03 0.3019
##
## Quantifying heterogeneity:
## tau^2 = 0.0471 [0.0138; 0.2196]; tau = 0.2170 [0.1173; 0.4686]
## I^2 = 76.9% [58.8%; 87.1%]; H = 2.08 [1.56; 2.78]
##
## Test of heterogeneity:
##      Q d.f.  p-value
## 43.33  10 < 0.0001
##
## Details on meta-analytical method:
## - Inverse variance method
## - Restricted maximum-likelihood estimator for tau^2
## - Q-Profile method for confidence interval of tau^2 and tau
## - Trim-and-fill method to adjust for funnel plot asymmetry (L-estimator)
```

```
forest(trimfill(immediate_sfr_metabin),
        sortvar = TE)
```

```
## Warning in trimfill.meta(immediate_sfr_metabin): 9 observation(s) dropped due
## to missing values
```



Heterogeneity:  $I^2 = 77\%$ ,  $\tau^2 = 0.0471$ ,  $p < 0.01$

### 10.1.4 Funnel plot

```
funnel(trimfill(immediate_sfr_metabin))
```

```
## Warning in trimfill.meta(immediate_sfr_metabin): 9 observation(s) dropped due  
## to missing values
```

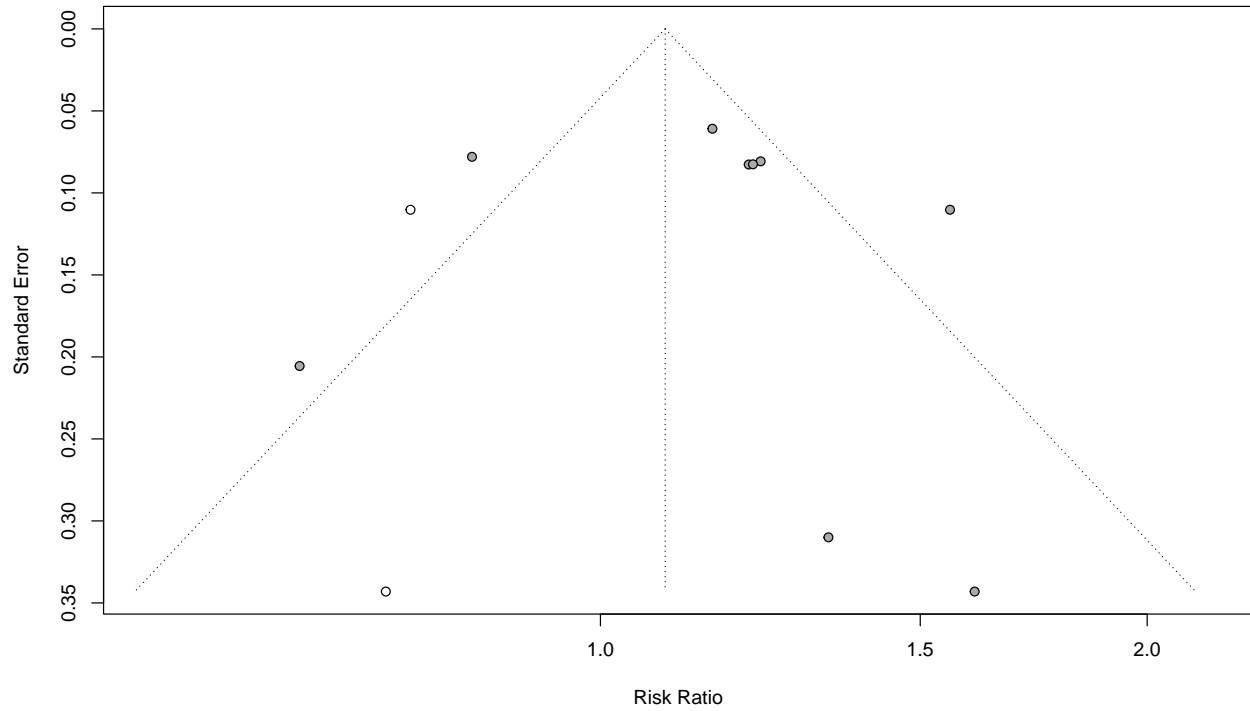



### 10.1.5 Baujat

```
baujat(immediate_sfr_metabin, pos = 1)
```



### 10.1.6 Leave one out

```
metainf(immediate_sfr_metabin)
```

```
## Influential analysis (common effect model)
##
##
##          RR          95%-CI  p-value  tau^2    tau
## Omitting Sur 2022      1.1581 [1.0834; 1.2380] < 0.0001  0.0365  0.1910
## Omitting Tang 2023      1.2195 [1.1329; 1.3128] < 0.0001  0.0076  0.0873
## Omitting Chen 2019      1.1581 [1.0834; 1.2380] < 0.0001  0.0365  0.1910
## Omitting Du 2019        1.1581 [1.0834; 1.2380] < 0.0001  0.0365  0.1910
## Omitting Lai 2020       1.1889 [1.1116; 1.2716] < 0.0001  0.0258  0.1607
## Omitting Zhu 2018       1.1601 [1.0710; 1.2565]  0.0003  0.0482  0.2196
## Omitting Zhang 2021     1.1473 [1.0741; 1.2254] < 0.0001  0.0376  0.1938
## Omitting Zhang 2021     1.1527 [1.0791; 1.2313] < 0.0001  0.0396  0.1990
## Omitting Lechevallier 2003 1.1581 [1.0834; 1.2380] < 0.0001  0.0365  0.1910
## Omitting Huang 2023     1.1057 [1.0315; 1.1853]  0.0046  0.0246  0.1568
## Omitting Wu 2022        1.1484 [1.0676; 1.2353]  0.0002  0.0464  0.2153
## Omitting Ding 2023      1.1581 [1.0834; 1.2380] < 0.0001  0.0365  0.1910
## Omitting Zhai 2023      1.1581 [1.0834; 1.2380] < 0.0001  0.0365  0.1910
## Omitting Zhai 2023      1.1581 [1.0834; 1.2380] < 0.0001  0.0365  0.1910
## Omitting Qian 2022      1.1508 [1.0700; 1.2377]  0.0002  0.0468  0.2164
## Omitting Zhang 2022     1.1581 [1.0834; 1.2380] < 0.0001  0.0365  0.1910
## Omitting Deng 2022      1.1581 [1.0834; 1.2380] < 0.0001  0.0365  0.1910
## Omitting AlSmadi 2019   1.1529 [1.0734; 1.2383] < 0.0001  0.0467  0.2160
##
## Pooled estimate        1.1581 [1.0834; 1.2380] < 0.0001  0.0365  0.1910
##
##          I^2
## Omitting Sur 2022      74.6%
## Omitting Tang 2023     51.5%
## Omitting Chen 2019     74.6%
## Omitting Du 2019       74.6%
## Omitting Lai 2020      72.2%
## Omitting Zhu 2018      77.8%
## Omitting Zhang 2021    77.1%
## Omitting Zhang 2021    77.6%
## Omitting Lechevallier 2003 74.6%
## Omitting Huang 2023    69.4%
## Omitting Wu 2022       77.2%
## Omitting Ding 2023     74.6%
## Omitting Zhai 2023     74.6%
## Omitting Zhai 2023     74.6%
## Omitting Qian 2022     77.4%
## Omitting Zhang 2022    74.6%
## Omitting Deng 2022     74.6%
## Omitting AlSmadi 2019  77.4%
##
## Pooled estimate        74.6%
##
## Details on meta-analytical method:
## - Mantel-Haenszel method
## - Restricted maximum-likelihood estimator for tau^2
```

## 10.2 Final SFR

### 10.2.1 Meta-analysis

```
sfr_metabin <- metabin(data = flexiurs_only,
                      event.c = sfr_final_n_control,
                      n.c = sample_size_control,
                      event.e = sfr_final_n_suction,
                      n.e = sample_size_suction,
                      studlab = author_year)

sfr_metabin

## Number of studies: k = 7
## Number of observations: o = 1084
## Number of events: e = 918
##
##              RR          95%-CI    z  p-value
## Common effect model  1.1937 [1.1280; 1.2633] 6.13 < 0.0001
## Random effects model  1.1956 [1.1008; 1.2986] 4.24 < 0.0001
##
## Quantifying heterogeneity:
## tau^2 = 0.0056 [0.0000; 0.0491]; tau = 0.0746 [0.0000; 0.2216]
## I^2 = 45.7% [0.0%; 77.1%]; H = 1.36 [1.00; 2.09]
##
## Test of heterogeneity:
##      Q d.f. p-value
## 11.05   6 0.0869
##
## Details on meta-analytical method:
## - Mantel-Haenszel method
## - Inverse variance method
## - Restricted maximum-likelihood estimator for tau^2
## - Q-Profile method for confidence interval of tau^2 and tau
## - Continuity correction of 0.5 in studies with zero cell frequencies
```

## 10.2.2 Forest plot

```
forest(sfr_metabin,
       sortvar = TE)
```

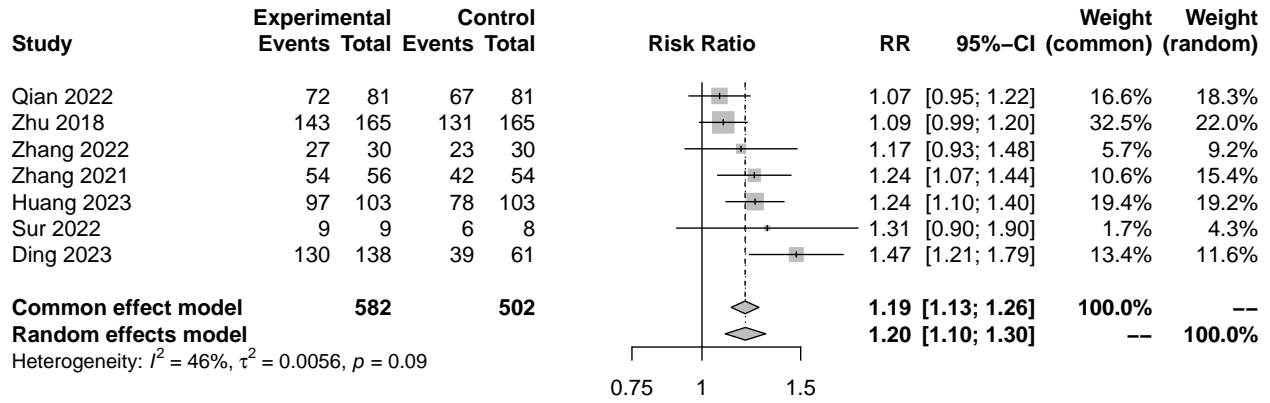

### 10.2.3 Trim and Fill

```
trimfill(sfr_metabin)
```

```
## Number of studies: k = 10 (with 3 added studies)
## Number of observations: o = 1506
## Number of events: e = 1277
##
##                RR          95%-CI    z p-value
## Random effects model 1.1277 [1.0267; 1.2385] 2.51 0.0120
##
## Quantifying heterogeneity:
## tau^2 = 0.0141 [0.0024; 0.0736]; tau = 0.1188 [0.0486; 0.2713]
## I^2 = 64.4% [29.9%; 81.9%]; H = 1.68 [1.19; 2.35]
##
## Test of heterogeneity:
##      Q d.f. p-value
## 25.27   9 0.0027
##
## Details on meta-analytical method:
## - Inverse variance method
## - Restricted maximum-likelihood estimator for tau^2
## - Q-Profile method for confidence interval of tau^2 and tau
## - Trim-and-fill method to adjust for funnel plot asymmetry (L-estimator)
forest(trimfill(sfr_metabin),
       sortvar = TE)
```

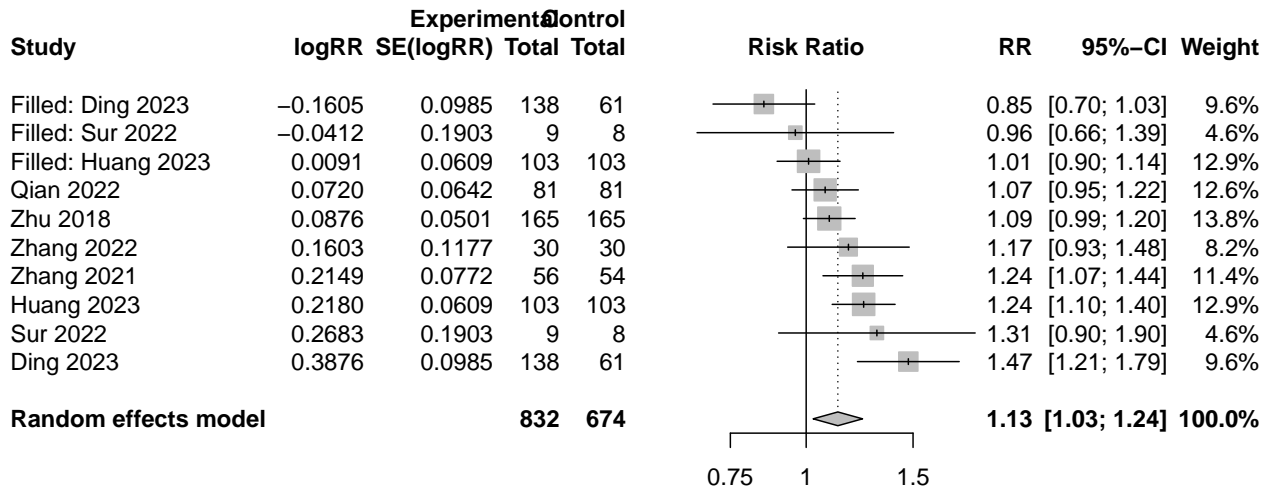

## 10.2.4 Funnel plot

```
funnel(trimfill(sfr_metabin))
```

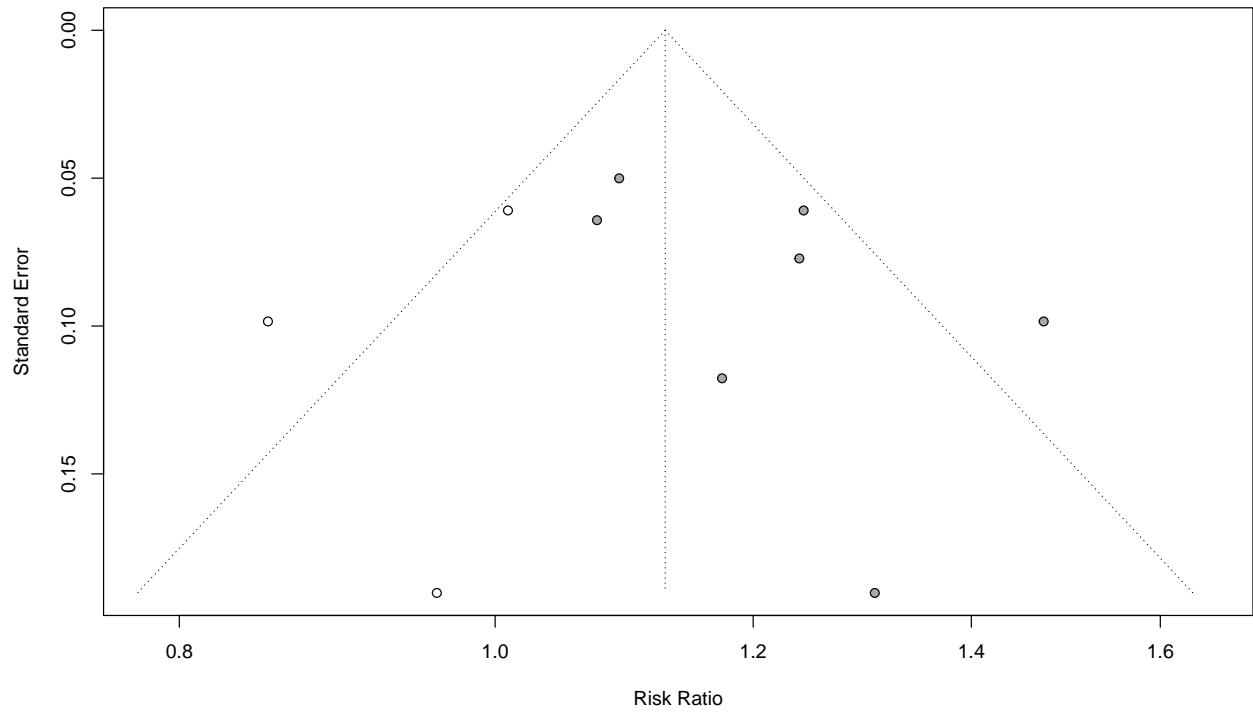

### 10.2.5 Baujat

```
baujat(sfr_metabin, pos = 1)
```

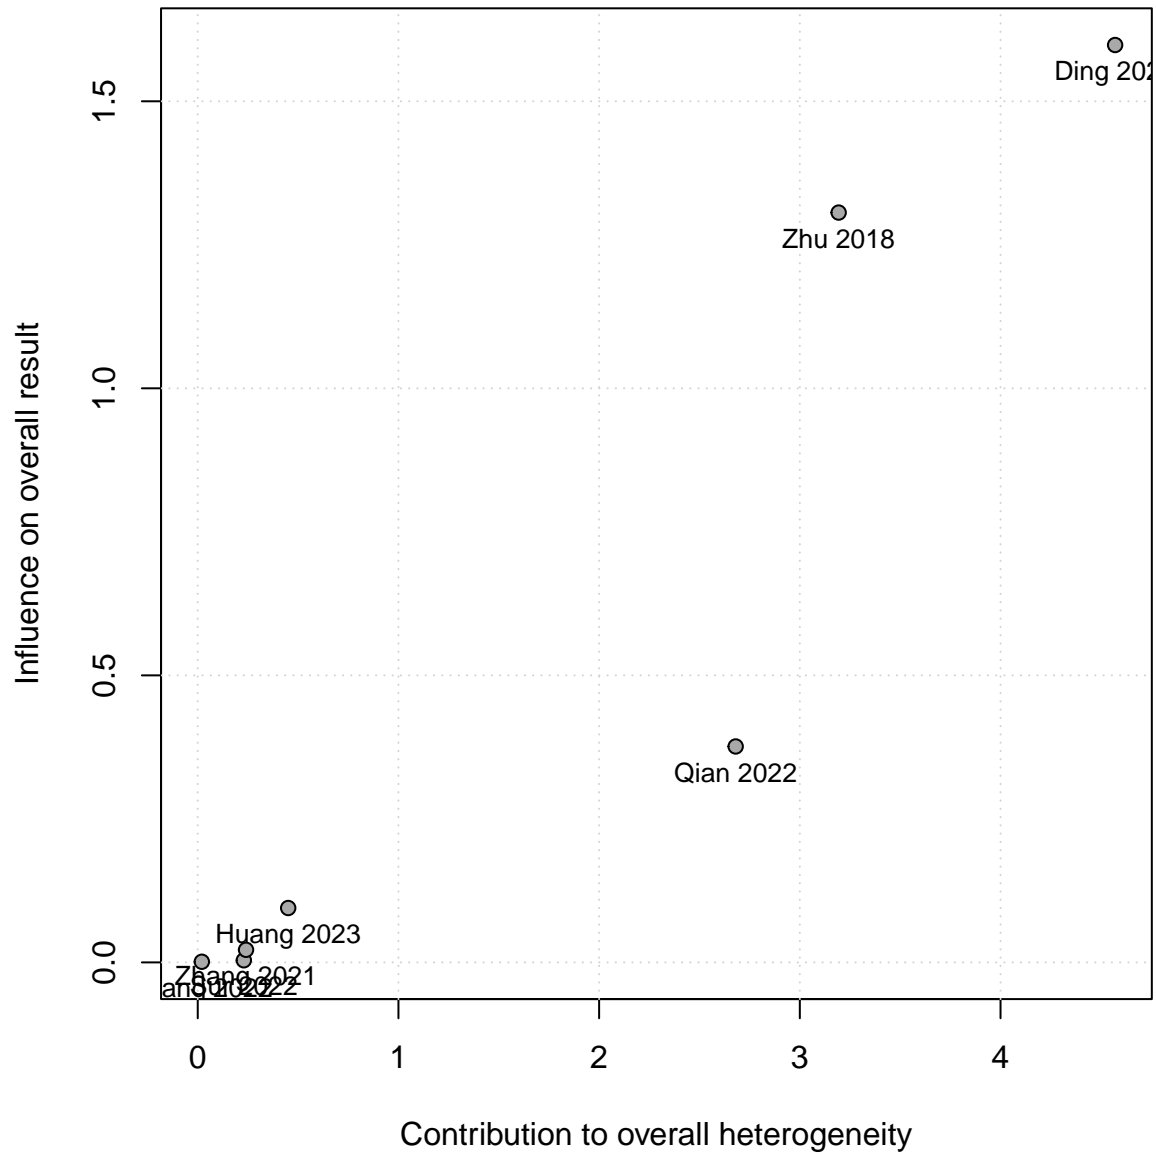

## 10.2.6 Leave one out

```
metainf(sfr_metabin)
```

```
## Influential analysis (common effect model)
##
##           RR           95%-CI  p-value  tau^2    tau    I^2
## Omitting Sur 2022  1.1916 [1.1254; 1.2617] < 0.0001 0.0060 0.0774 53.4%
## Omitting Zhu 2018  1.2430 [1.1597; 1.3322] < 0.0001 0.0052 0.0719 37.0%
## Omitting Zhang 2021 1.1883 [1.1182; 1.2628] < 0.0001 0.0076 0.0872 52.3%
## Omitting Huang 2023 1.1818 [1.1083; 1.2601] < 0.0001 0.0077 0.0880 49.7%
## Omitting Ding 2023  1.1503 [1.0862; 1.2183] < 0.0001 0.0016 0.0395  5.3%
## Omitting Qian 2022  1.2175 [1.1432; 1.2967] < 0.0001 0.0054 0.0733 42.4%
## Omitting Zhang 2022 1.1949 [1.1271; 1.2669] < 0.0001 0.0073 0.0852 54.7%
##
## Pooled estimate    1.1937 [1.1280; 1.2633] < 0.0001 0.0056 0.0746 45.7%
##
## Details on meta-analytical method:
## - Mantel-Haenszel method
## - Restricted maximum-likelihood estimator for tau^2
```



## 10.3 OR time

### 10.3.1 Meta-analysis

```
or_time_metacont <- metacont(data = flexiurs_only,
                             mean.c = or_time_min_mean_control,
                             sd.c = or_time_min_sd_control,
                             mean.e = or_time_min_mean_suction,
                             sd.e = or_time_min_sd_suction,
                             n.e = sample_size_suction,
                             n.c = sample_size_control,
                             studlab = author_year)

or_time_metacont

## Number of studies: k = 6
## Number of observations: o = 1084
##
##              MD              95%-CI      z  p-value
## Common effect model -4.3519 [-6.3102; -2.3937] -4.36 < 0.0001
## Random effects model -4.3074 [-8.6117; -0.0031] -1.96  0.0498
##
## Quantifying heterogeneity:
## tau^2 = 17.2246 [2.8614; >172.2459]; tau = 4.1503 [1.6916; >13.1242]
## I^2 = 73.6% [39.5%; 88.4%]; H = 1.94 [1.29; 2.94]
##
## Test of heterogeneity:
##      Q d.f. p-value
## 18.91  5  0.0020
##
## Details on meta-analytical method:
## - Inverse variance method
## - Restricted maximum-likelihood estimator for tau^2
## - Q-Profile method for confidence interval of tau^2 and tau
```

### 10.3.2 Forest plot

```
forest(or_time_metacont,
       sortvar = TE)
```

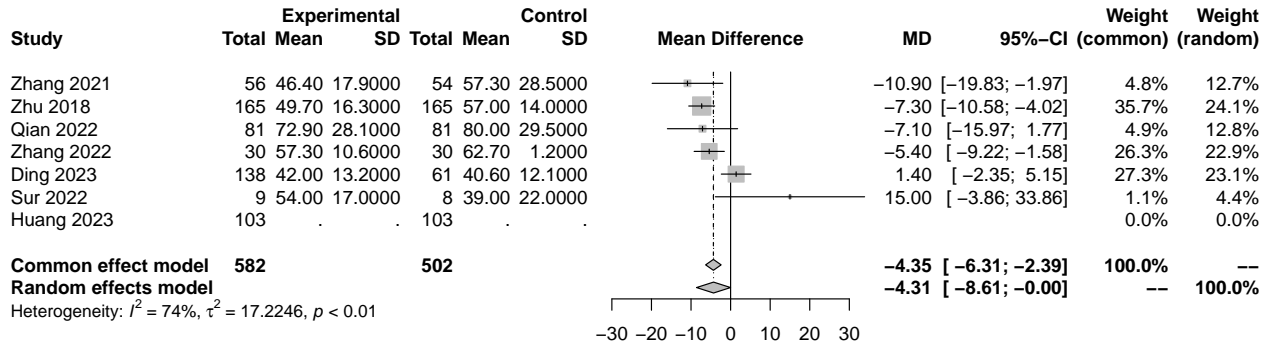

### 10.3.3 Trim and Fill

```
trimfill(or_time_metacont)
```

```
## Warning in trimfill.meta(or_time_metacont): 1 observation(s) dropped due to
## missing values
```

```
## Number of studies: k = 6 (with 0 added studies)
```

```
## Number of observations: o = 878
```

```
##
```

```
##           MD           95%-CI      z p-value
```

```
## Random effects model -4.3074 [-8.6117; -0.0031] -1.96 0.0498
```

```
##
```

```
## Quantifying heterogeneity:
```

```
## tau^2 = 17.2246 [2.8614; >172.2459]; tau = 4.1503 [1.6916; >13.1242]
```

```
## I^2 = 73.6% [39.5%; 88.4%]; H = 1.94 [1.29; 2.94]
```

```
##
```

```
## Test of heterogeneity:
```

```
##      Q d.f. p-value
```

```
## 18.91   5 0.0020
```

```
##
```

```
## Details on meta-analytical method:
```

```
## - Inverse variance method
```

```
## - Restricted maximum-likelihood estimator for tau^2
```

```
## - Q-Profile method for confidence interval of tau^2 and tau
```

```
## - Trim-and-fill method to adjust for funnel plot asymmetry (L-estimator)
```

```
forest(trimfill(or_time_metacont),
        sortvar = TE)
```

```
## Warning in trimfill.meta(or_time_metacont): 1 observation(s) dropped due to
## missing values
```

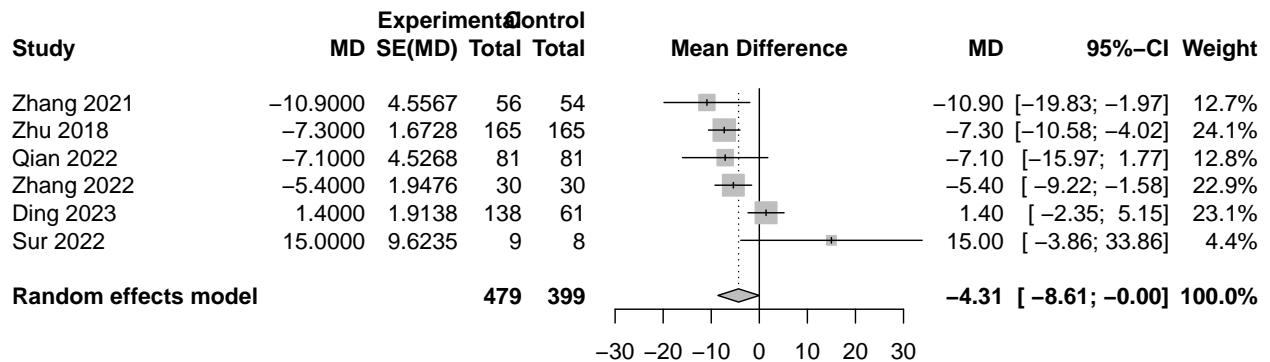

### 10.3.4 Funnel plot

```
funnel(trimfill(or_time_metacont))
```

```
## Warning in trimfill.meta(or_time_metacont): 1 observation(s) dropped due to  
## missing values
```

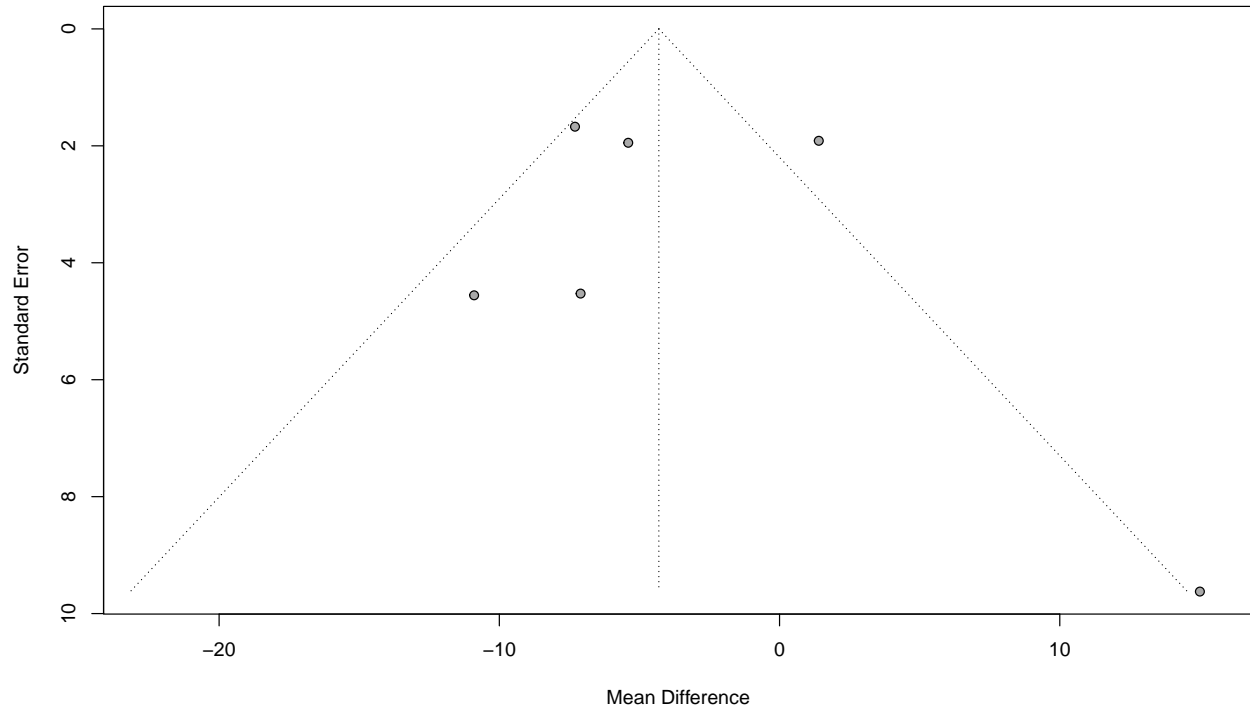

### 10.3.5 Baujat

```
baujat(or_time_metacont, pos = 1)
```

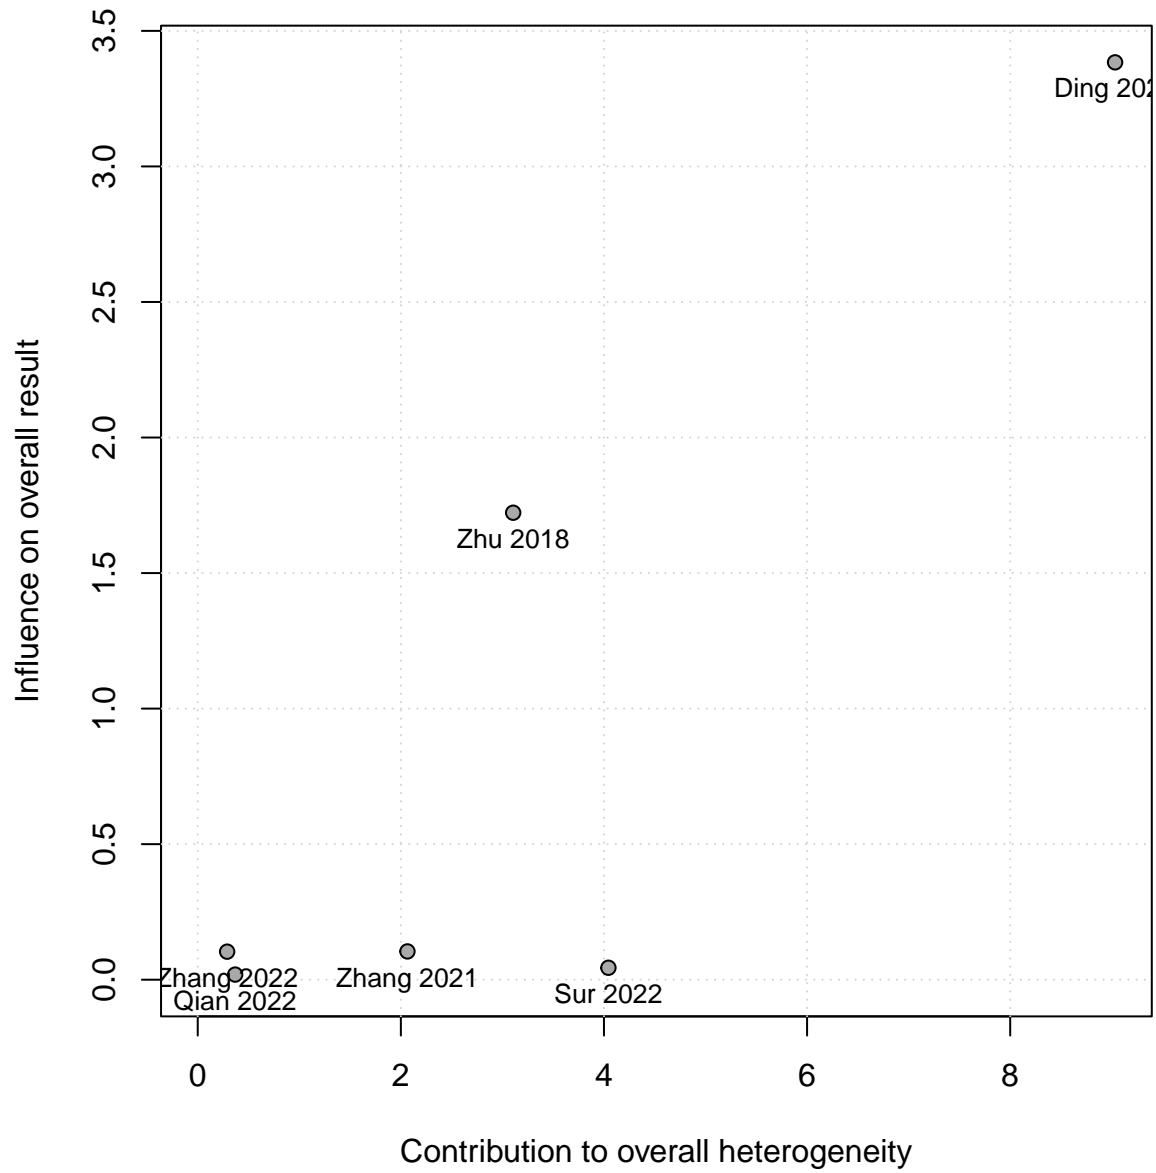

### 10.3.6 Leave one out

```
metainf(or_time_metacont)
```

```
## Influential analysis (common effect model)
##
##           MD           95%-CI  p-value   tau^2    tau
## Omitting Sur 2022  -4.5628 [-6.5317; -2.5939] < 0.0001  14.4616  3.8028
## Omitting Zhu 2018  -2.7170 [-5.1585; -0.2754]  0.0292  23.5074  4.8484
## Omitting Zhang 2021 -4.0212 [-6.0283; -2.0142] < 0.0001  17.2725  4.1560
## Omitting Huang 2023 -4.3519 [-6.3102; -2.3937] < 0.0001  17.2246  4.1503
## Omitting Ding 2023  -6.5068 [-8.8027; -4.2109] < 0.0001   0.0000  0.0025
## Omitting Qian 2022  -4.2112 [-6.2190; -2.2035] < 0.0001  23.6032  4.8583
## Omitting Zhang 2022 -3.9777 [-6.2589; -1.6964]  0.0006  29.5130  5.4326
##
## Pooled estimate    -4.3519 [-6.3102; -2.3937] < 0.0001  17.2246  4.1503
##
##           I^2
## Omitting Sur 2022  73.0%
## Omitting Zhu 2018  71.6%
## Omitting Zhang 2021 76.1%
## Omitting Huang 2023 73.6%
## Omitting Ding 2023  38.4%
## Omitting Qian 2022  78.4%
## Omitting Zhang 2022  78.4%
##
## Pooled estimate    73.6%
##
## Details on meta-analytical method:
## - Inverse variance method
## - Restricted maximum-likelihood estimator for tau^2
```

## 10.4 Auxiliary Treatments

### 10.4.1 Meta-analysis

```
aux_rx_metabin <- metabin(data = flexiurs_only,
                          event.c = auxillary_tx_n_control,
                          n.c = sample_size_control,
                          event.e = auxillary_tx_n_suction,
                          n.e = sample_size_suction,
                          studlab = author_year)

aux_rx_metabin

## Number of studies: k = 1
## Number of observations: o = 1084
## Number of events: e = 1
##
##              RR          95%-CI      z p-value
## Common effect model 0.3333 [0.0137; 8.1235] -0.67 0.5001
## Random effects model 0.3333 [0.0137; 8.1233] -0.67 0.5001
##
## Quantifying heterogeneity:
## tau^2 = NA; tau = NA; I^2 = NA; H = NA
##
## Details on meta-analytical method:
## - Mantel-Haenszel method
## - Inverse variance method
## - Restricted maximum-likelihood estimator for tau^2
## - Continuity correction of 0.5 in studies with zero cell frequencies
```

### 10.4.2 Forest plot

```
forest(aux_rx_metabin,
       sortvar = TE)
```

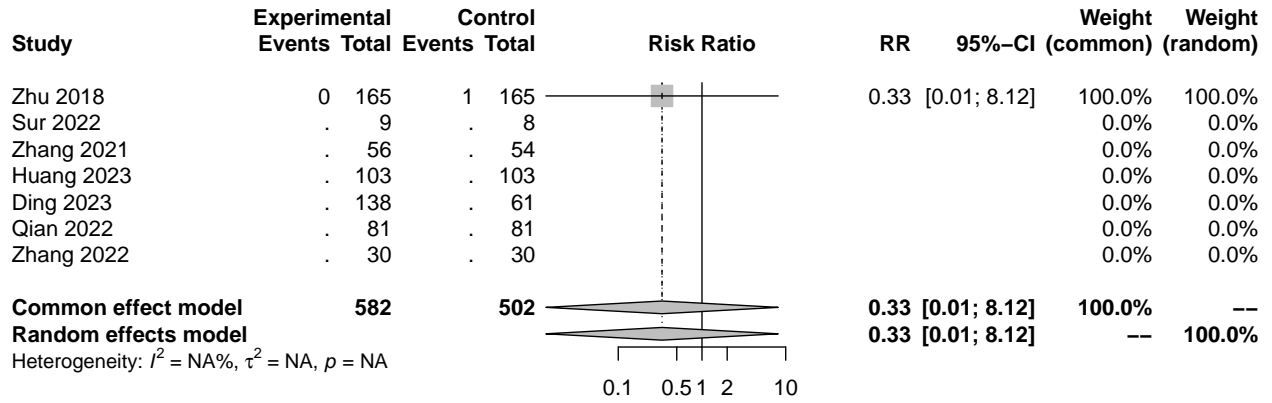



### 10.4.3 Trim and Fill

```
#trimfill(aux_rx_metabin)  
#forest(trimfill(aux_rx_metabin),  
#      sortvar = TE)
```

#### 10.4.4 Funnel plot

```
#funnel(trimfill(aux_rx_metabin))
```

#### 10.4.5 Baujat

```
#baujat(aux_rx_metabin, pos = 1)
```

#### 10.4.6 Leave one out

```
#metainf(aux_rx_metabin)
```

## 10.5 VAS

### 10.5.1 Meta-analysis

```
vas_metacont <- metacont(data = flexiurs_only,
                        mean.c = vas_score_mean_control,
                        sd.c = vas_score_sd_control,
                        mean.e = vas_score_mean_suction,
                        sd.e = vas_score_sd_suction,
                        n.e = sample_size_suction,
                        n.c = sample_size_control,
                        studlab = author_year)

vas_metacont

## Number of studies: k = 1
## Number of observations: o = 1084
##
##              MD              95%-CI      z p-value
## Common effect model -0.3400 [-0.6488; -0.0312] -2.16 0.0309
## Random effects model -0.3400 [-0.6488; -0.0312] -2.16 0.0309
##
## Quantifying heterogeneity:
## tau^2 = NA; tau = NA; I^2 = NA; H = NA
##
## Details on meta-analytical method:
## - Inverse variance method
## - Restricted maximum-likelihood estimator for tau^2
```

### 10.5.2 Forest plot

```
forest(vas_metacont,
       sortvar = TE)
```

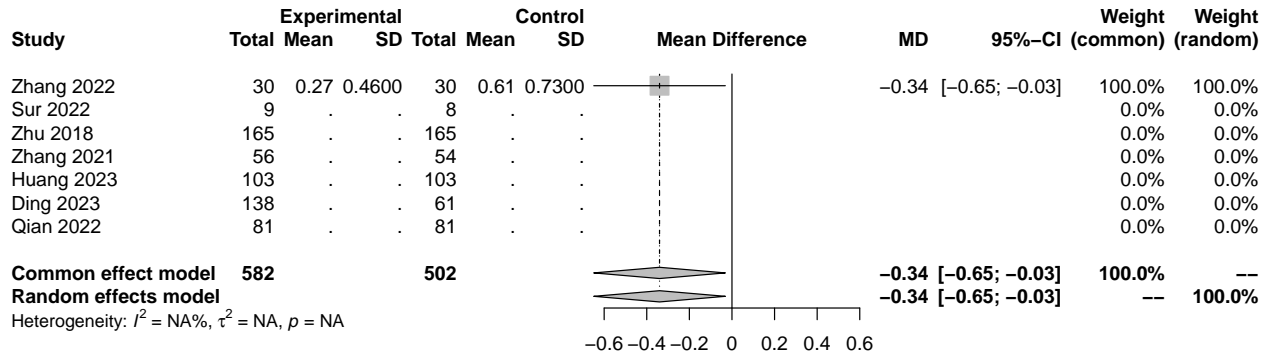

### 10.5.3 Trim and Fill

```
#trimfill(vas_metacont)  
#forest(trimfill(vas_metacont))
```

### 10.5.4 Funnel plot

```
funnel((vas_metacont))
```

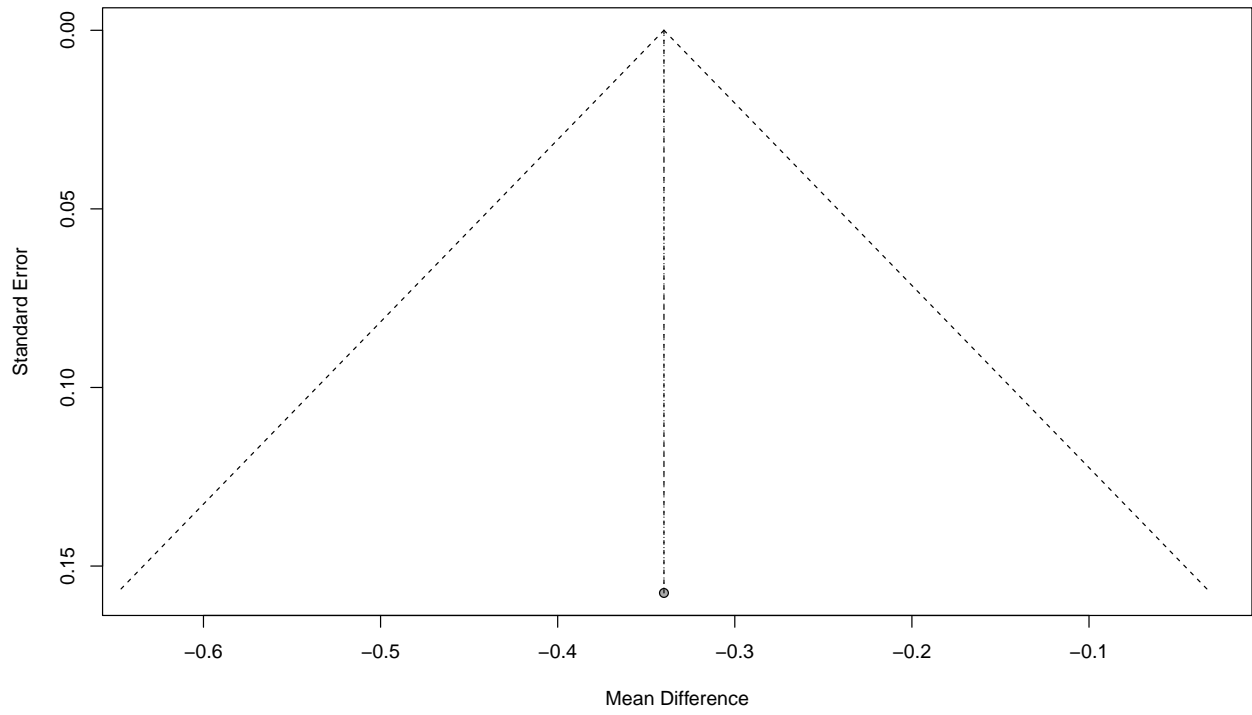



### 10.5.5 Baujat

```
baujat(vas_metacont, pos = 1)
```

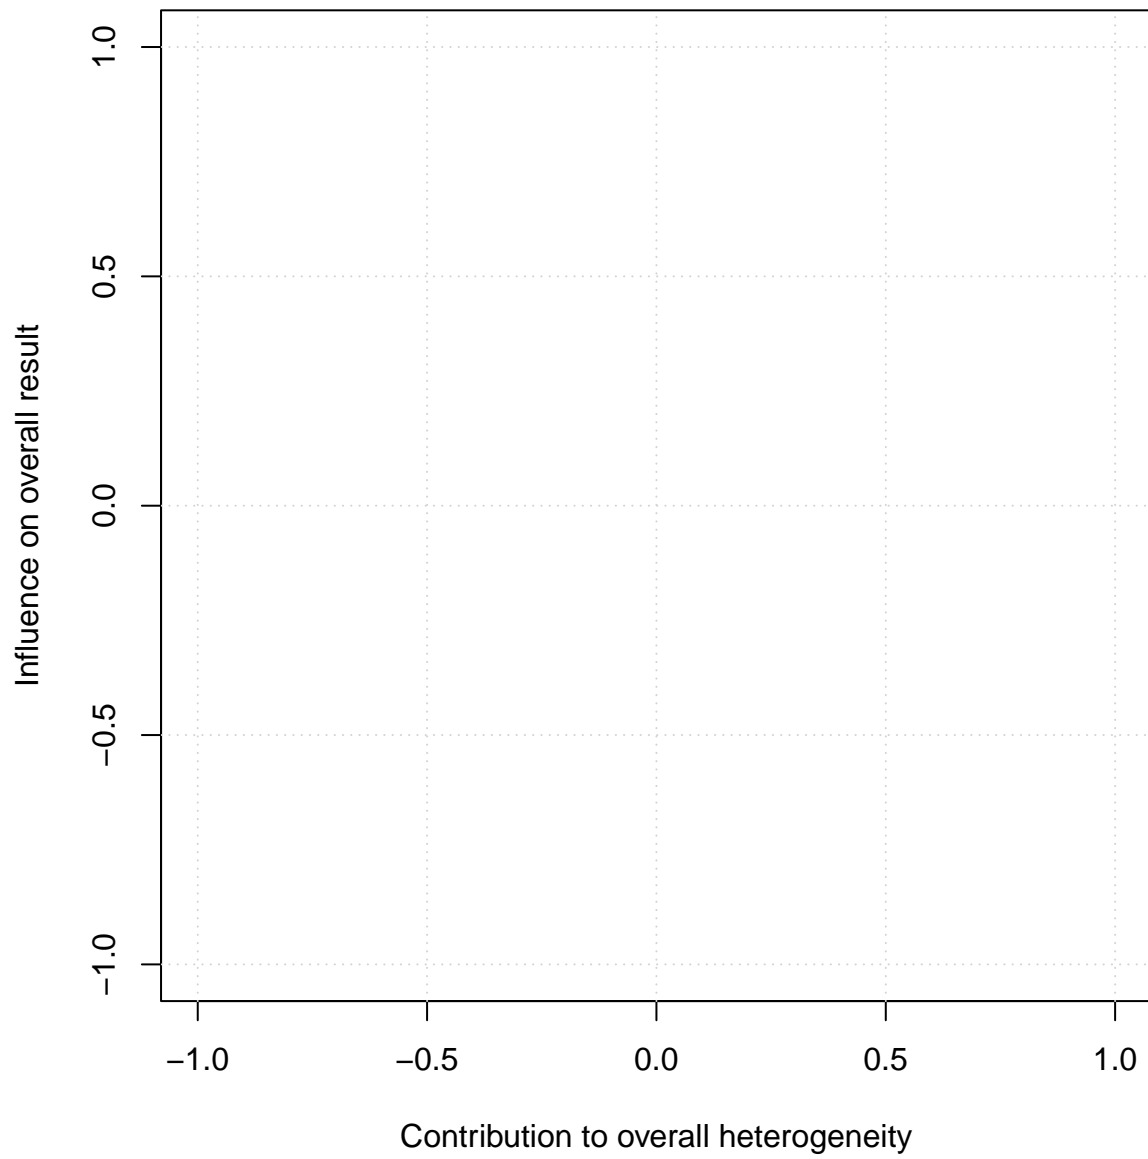

## 10.5.6 Leave one out

```
metainf(vas_metacont)
```

```
## Influential analysis (common effect model)
##
##           MD           95%-CI p-value tau^2 tau I^2
## Omitting Sur 2022  -0.3400 [-0.6488; -0.0312] 0.0309
## Omitting Zhu 2018  -0.3400 [-0.6488; -0.0312] 0.0309
## Omitting Zhang 2021 -0.3400 [-0.6488; -0.0312] 0.0309
## Omitting Huang 2023 -0.3400 [-0.6488; -0.0312] 0.0309
## Omitting Ding 2023  -0.3400 [-0.6488; -0.0312] 0.0309
## Omitting Qian 2022  -0.3400 [-0.6488; -0.0312] 0.0309
## Omitting Zhang 2022
##
## Pooled estimate    -0.3400 [-0.6488; -0.0312] 0.0309
##
## Details on meta-analytical method:
## - Inverse variance method
## - Restricted maximum-likelihood estimator for tau^2
```

## 10.6 LoS

### 10.6.1 Meta-analysis

```
los_metacont <- metacont(data = flexiurs_only,
                        mean.c = los_days_mean_control,
                        sd.c = los_days_sd_control,
                        mean.e = los_days_mean_suction,
                        sd.e = los_days_sd_suction,
                        n.e = sample_size_suction,
                        n.c = sample_size_control,
                        studlab = author_year)

los_metacont

## Number of studies: k = 2
## Number of observations: o = 1084
##
##              MD              95%-CI      z p-value
## Common effect model -0.3113 [-0.5488; -0.0738] -2.57 0.0102
## Random effects model -0.4965 [-1.1744; 0.1814] -1.44 0.1512
##
## Quantifying heterogeneity:
## tau^2 = 0.1901; tau = 0.4360; I^2 = 77.6% [2.1%; 94.9%]; H = 2.11 [1.01; 4.42]
##
## Test of heterogeneity:
##   Q d.f. p-value
## 4.46  1 0.0346
##
## Details on meta-analytical method:
## - Inverse variance method
## - Restricted maximum-likelihood estimator for tau^2
```

### 10.6.2 Forest plot

```
forest(los_metacont,
       sortvar = TE)
```

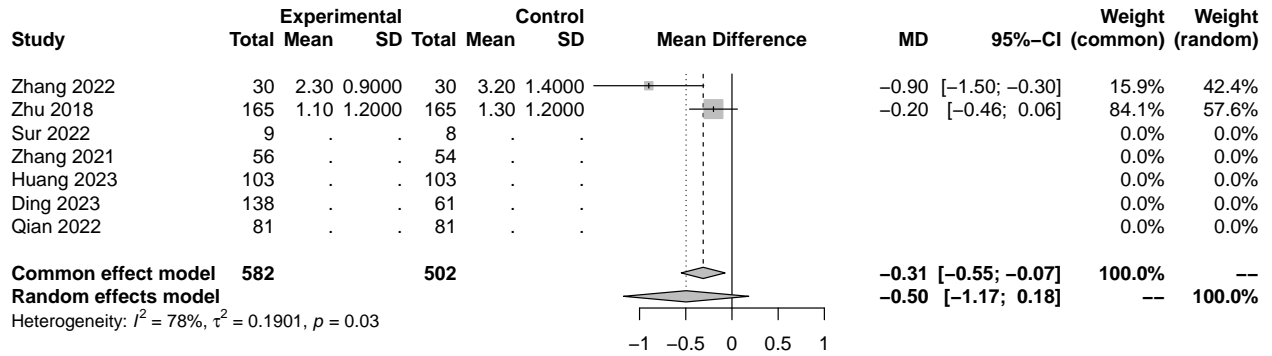

### 10.6.3 Trim and Fill

```
#trimfill(los_metacont)  
#forest(trimfill(los_metacont),  
#      sortvar = TE)
```

### 10.6.4 Funnel plot

```
funnel((los_metacont))
```

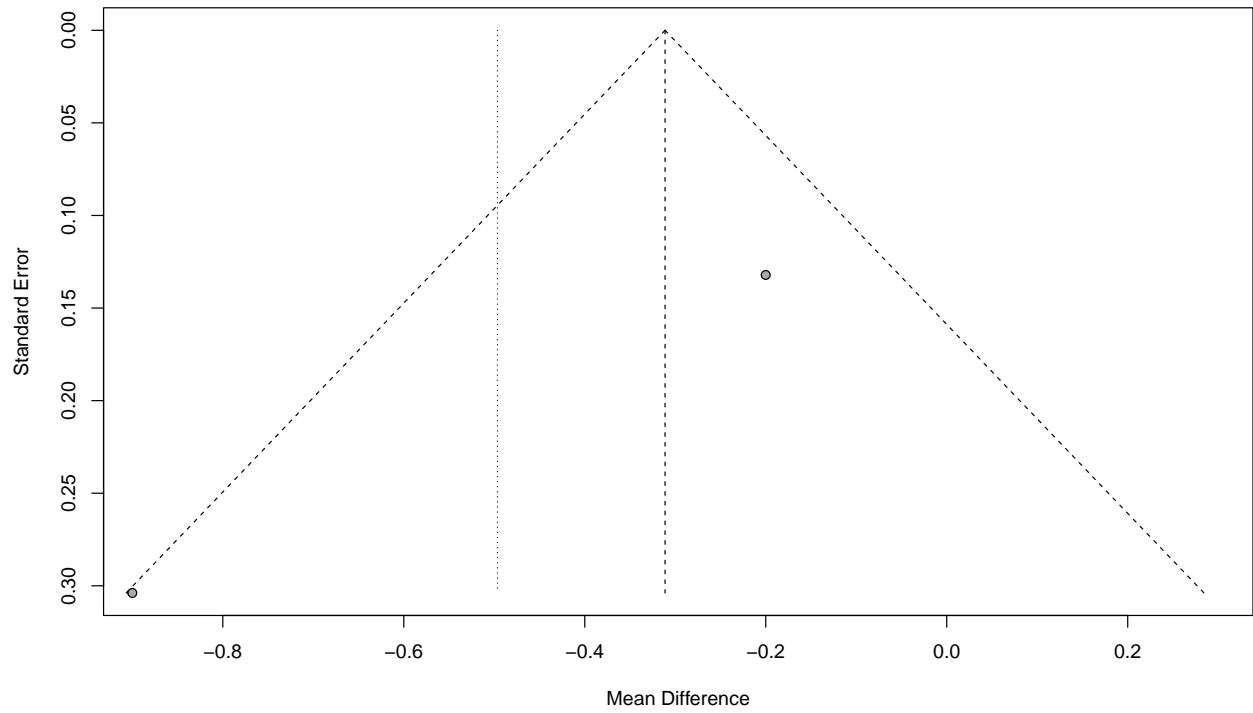

### 10.6.5 Baujat

```
baujat(los_metacont, pos = 1)
```

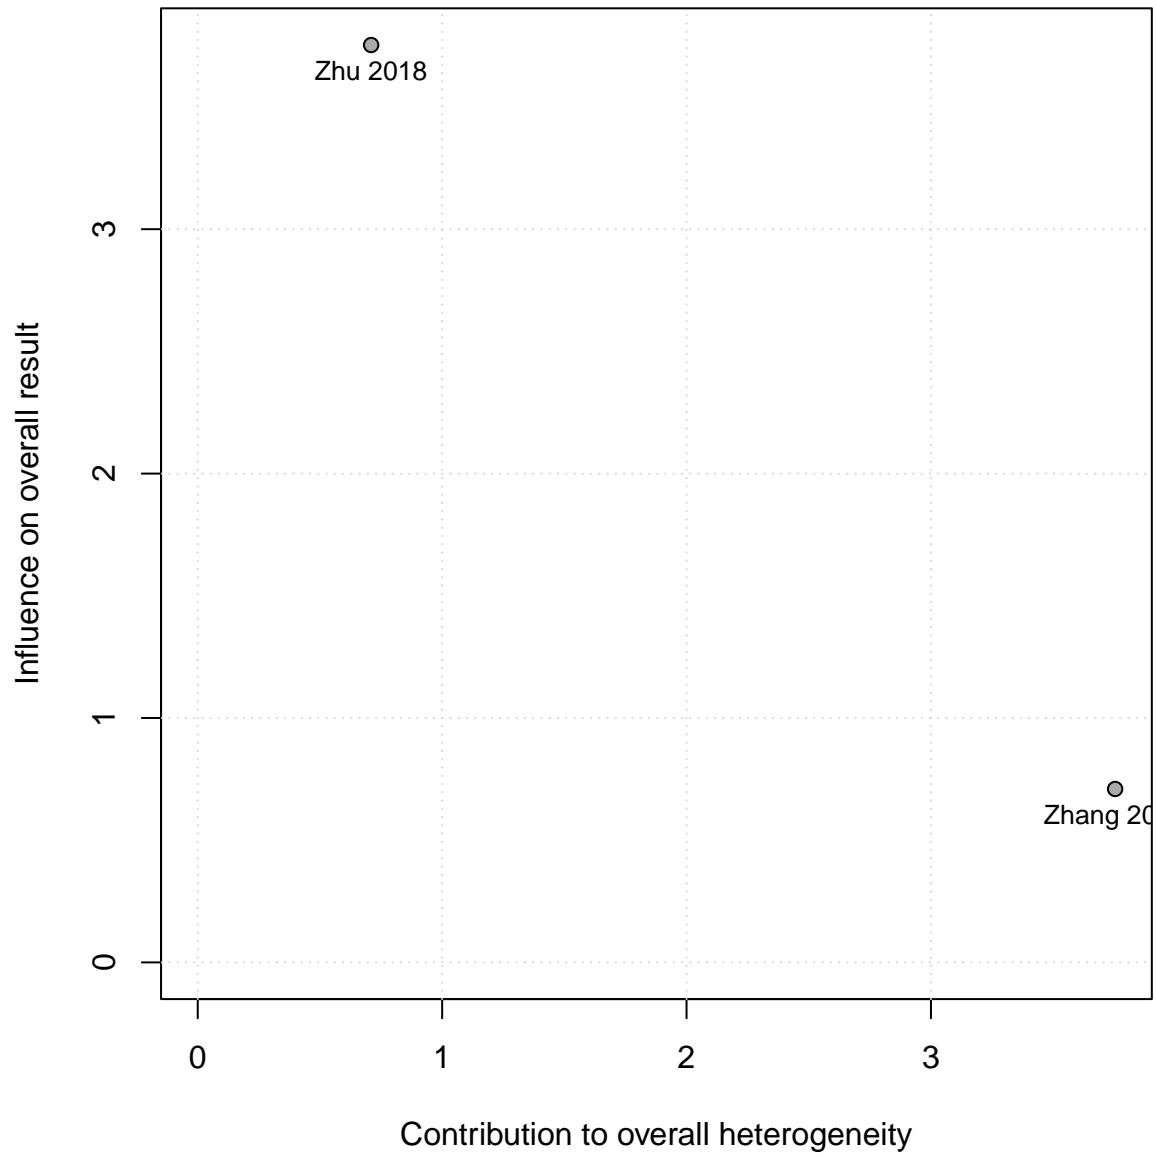

### 10.6.6 Leave one out

```
metainf(los_metacont)
```

```
## Influential analysis (common effect model)
##
##           MD           95%-CI p-value  tau^2    tau    I^2
## Omitting Sur 2022  -0.3113 [-0.5488; -0.0738]  0.0102  0.1901  0.4360  77.6%
## Omitting Zhu 2018  -0.9000 [-1.4956; -0.3044]  0.0031
## Omitting Zhang 2021 -0.3113 [-0.5488; -0.0738]  0.0102  0.1901  0.4360  77.6%
## Omitting Huang 2023 -0.3113 [-0.5488; -0.0738]  0.0102  0.1901  0.4360  77.6%
## Omitting Ding 2023  -0.3113 [-0.5488; -0.0738]  0.0102  0.1901  0.4360  77.6%
## Omitting Qian 2022  -0.3113 [-0.5488; -0.0738]  0.0102  0.1901  0.4360  77.6%
## Omitting Zhang 2022 -0.2000 [-0.4589;  0.0589]  0.1301
##
## Pooled estimate    -0.3113 [-0.5488; -0.0738]  0.0102  0.1901  0.4360  77.6%
##
## Details on meta-analytical method:
## - Inverse variance method
## - Restricted maximum-likelihood estimator for tau^2
```



## 10.7 Complications - All

### 10.7.1 Meta-analysis

```
comp_metabin <- metabin(data = flexiurs_only,
                        event.c = complications_postop_overall_n_control,
                        n.c = sample_size_control,
                        event.e = complications_postop_overall_n_suction,
                        n.e = sample_size_suction,
                        studlab = author_year)
```

```
comp_metabin
```

```
## Number of studies: k = 7
## Number of observations: o = 1084
## Number of events: e = 96
##
##              RR          95%-CI      z p-value
## Common effect model  0.4237 [0.2831; 0.6339] -4.18 < 0.0001
## Random effects model 0.4420 [0.2931; 0.6664] -3.90 < 0.0001
##
## Quantifying heterogeneity:
## tau2 = 0 [0.0000; 2.2180]; tau = 0 [0.0000; 1.4893]
## I2 = 0.0% [0.0%; 70.8%]; H = 1.00 [1.00; 1.85]
##
## Test of heterogeneity:
##   Q d.f. p-value
## 3.54  6 0.7386
##
## Details on meta-analytical method:
## - Mantel-Haenszel method
## - Inverse variance method
## - Restricted maximum-likelihood estimator for tau2
## - Q-Profile method for confidence interval of tau2 and tau
## - Continuity correction of 0.5 in studies with zero cell frequencies
```

### 10.7.2 Forest plot

```
forest(comp_metabin,
       sortvar = TE)
```

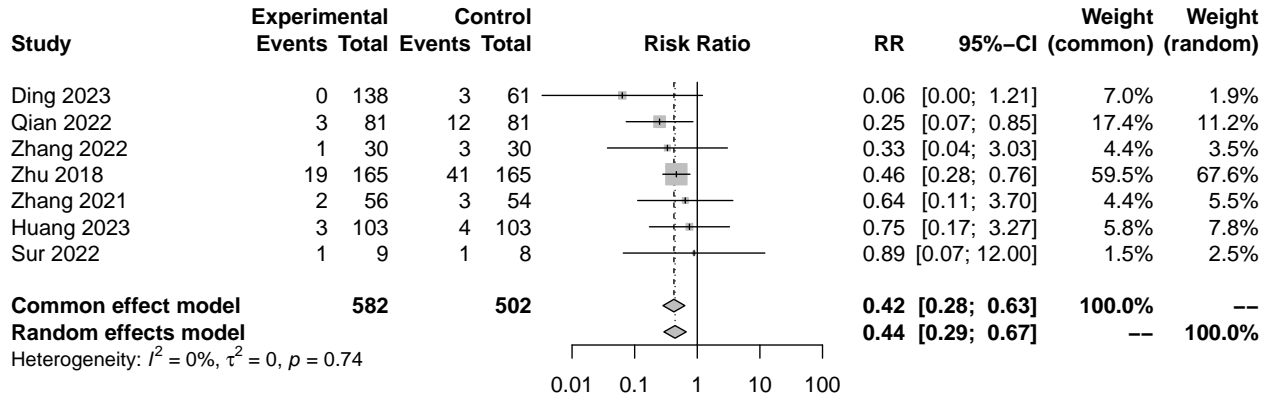

### 10.7.3 Trim and Fill

```
trimfill(comp_metabin)
```

```
## Number of studies: k = 7 (with 0 added studies)
## Number of observations: o = 1084
## Number of events: e = 96
##
##                               RR           95%-CI      z  p-value
## Random effects model 0.4420 [0.2931; 0.6664] -3.90 < 0.0001
##
## Quantifying heterogeneity:
## tau^2 = 0 [0.0000; 2.2180]; tau = 0 [0.0000; 1.4893]
## I^2 = 0.0% [0.0%; 70.8%]; H = 1.00 [1.00; 1.85]
##
## Test of heterogeneity:
##   Q d.f. p-value
## 3.54   6 0.7386
##
## Details on meta-analytical method:
## - Inverse variance method
## - Restricted maximum-likelihood estimator for tau^2
## - Q-Profile method for confidence interval of tau^2 and tau
## - Trim-and-fill method to adjust for funnel plot asymmetry (L-estimator)
```

```
forest(trimfill(comp_metabin),
        sortvar = TE)
```

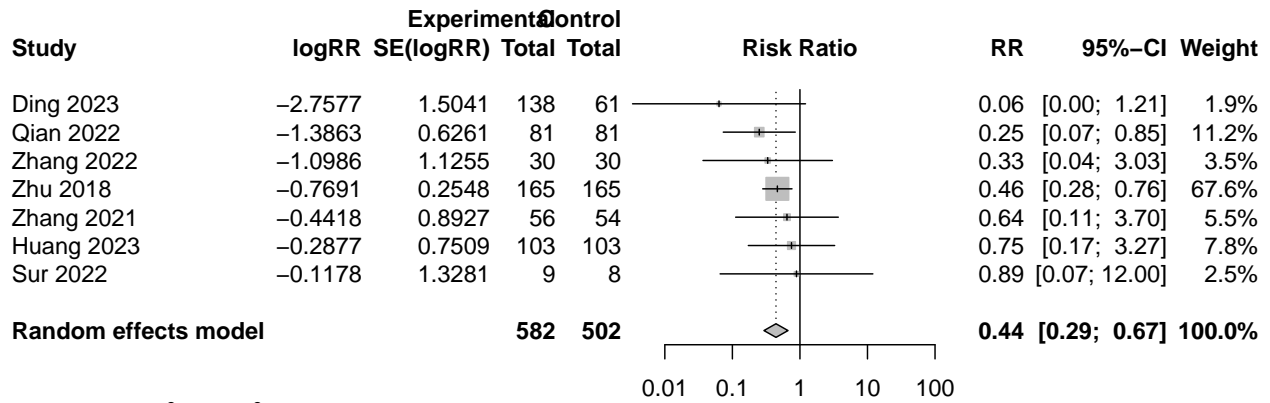

### 10.7.4 Funnel plot

```
funnel(trimfill(comp_metabin))
```

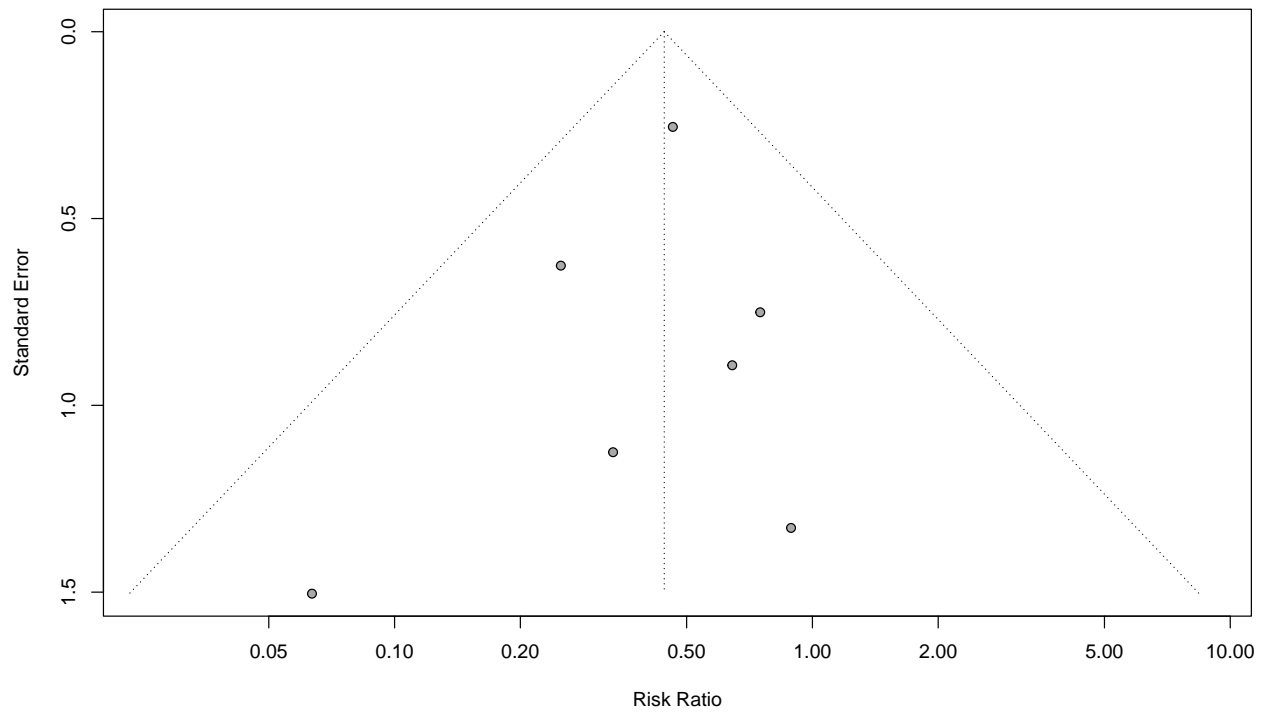

### 10.7.5 Baujat

```
baujat(comp_metabin, pos = 1)
```

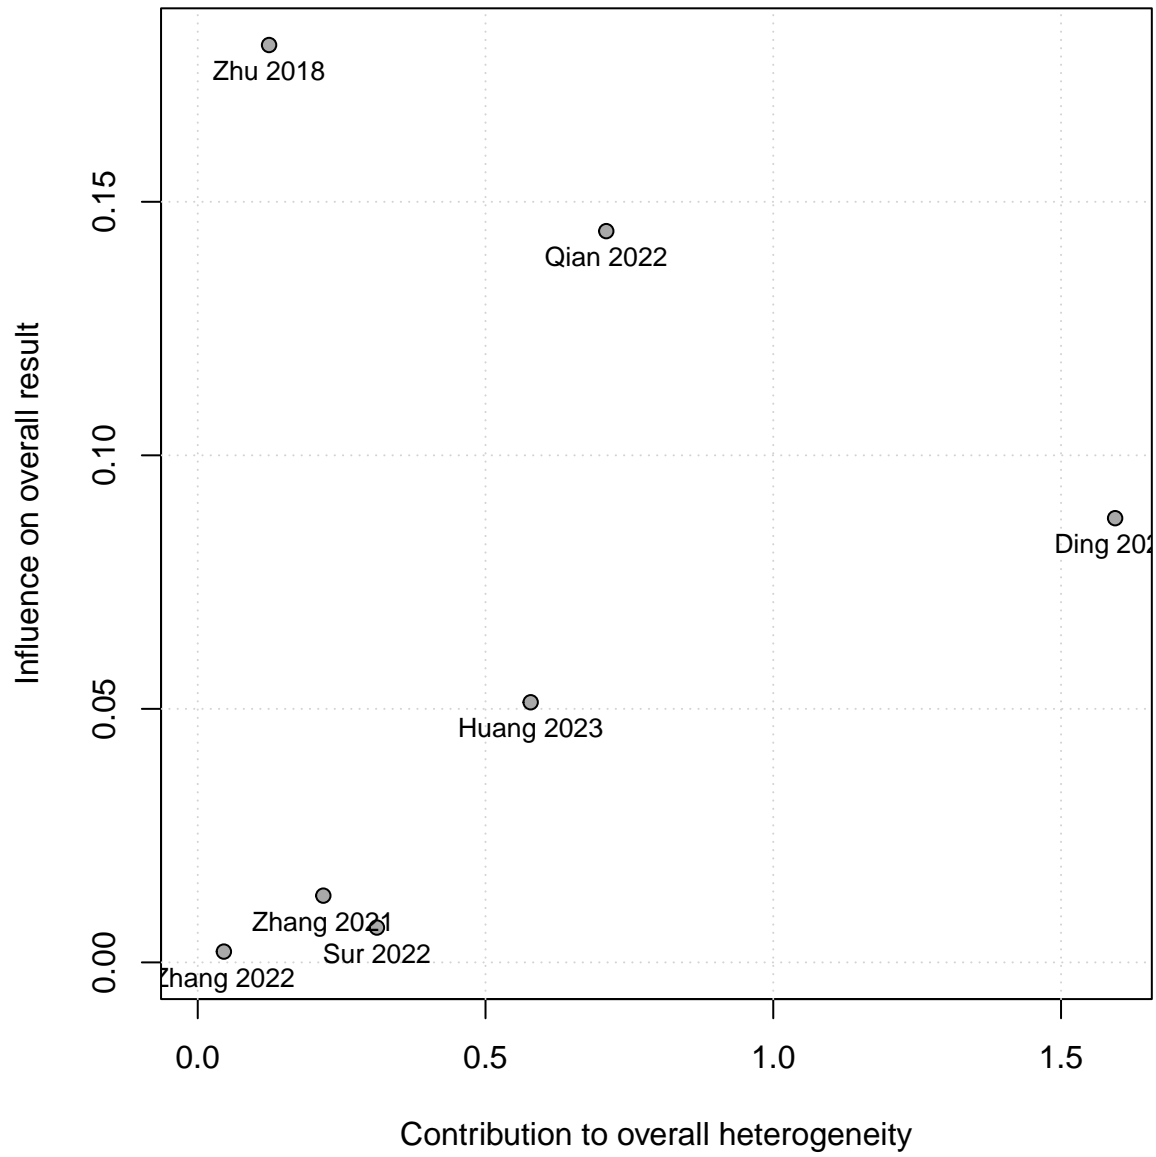

### 10.7.6 Leave one out

```
metainf(comp_metabin)
```

```
## Influential analysis (common effect model)
##
##           RR           95%-CI  p-value  tau^2    tau    I^2
## Omitting Sur 2022    0.4164 [0.2768; 0.6265] < 0.0001 0.0000 0.0000 0.0%
## Omitting Zhu 2018    0.3654 [0.1847; 0.7228]  0.0038 0.0000 0.0000 0.0%
## Omitting Zhang 2021  0.4135 [0.2731; 0.6260] < 0.0001 0.0000 0.0000 0.0%
## Omitting Huang 2023  0.4036 [0.2650; 0.6145] < 0.0001 0.0000 0.0000 0.0%
## Omitting Ding 2023   0.4508 [0.2987; 0.6805]  0.0001 0.0000 0.0000 0.0%
## Omitting Qian 2022   0.4603 [0.3001; 0.7058]  0.0004 0.0000 0.0000 0.0%
## Omitting Zhang 2022  0.4278 [0.2839; 0.6445] < 0.0001 0.0000 0.0015 0.0%
##
## Pooled estimate      0.4237 [0.2831; 0.6339] < 0.0001 0.0000 0.0000 0.0%
##
## Details on meta-analytical method:
## - Mantel-Haenszel method
## - Restricted maximum-likelihood estimator for tau^2
```

## 10.8 Fever

### 10.8.1 Meta-analysis

```
fever_metabin <- metabin(data = flexiurs_only,
                        event.c = fever_n_control,
                        n.c = sample_size_control,
                        event.e = fever_n_suction,
                        n.e = sample_size_suction,
                        studlab = author_year)

fever_metabin

## Number of studies: k = 6
## Number of observations: o = 1084
## Number of events: e = 66
##
##              RR          95%-CI      z p-value
## Common effect model 0.3662 [0.2194; 0.6113] -3.84 0.0001
## Random effects model 0.3830 [0.2261; 0.6487] -3.57 0.0004
##
## Quantifying heterogeneity:
## tau^2 = 0 [0.0000; 3.1138]; tau = 0 [0.0000; 1.7646]
## I^2 = 0.0% [0.0%; 74.6%]; H = 1.00 [1.00; 1.99]
##
## Test of heterogeneity:
##      Q d.f. p-value
## 3.05   5 0.6924
##
## Details on meta-analytical method:
## - Mantel-Haenszel method
## - Inverse variance method
## - Restricted maximum-likelihood estimator for tau^2
## - Q-Profile method for confidence interval of tau^2 and tau
## - Continuity correction of 0.5 in studies with zero cell frequencies
```

## 10.8.2 Forest plot

```
forest(fever_metabin,
       sortvar = TE)
```

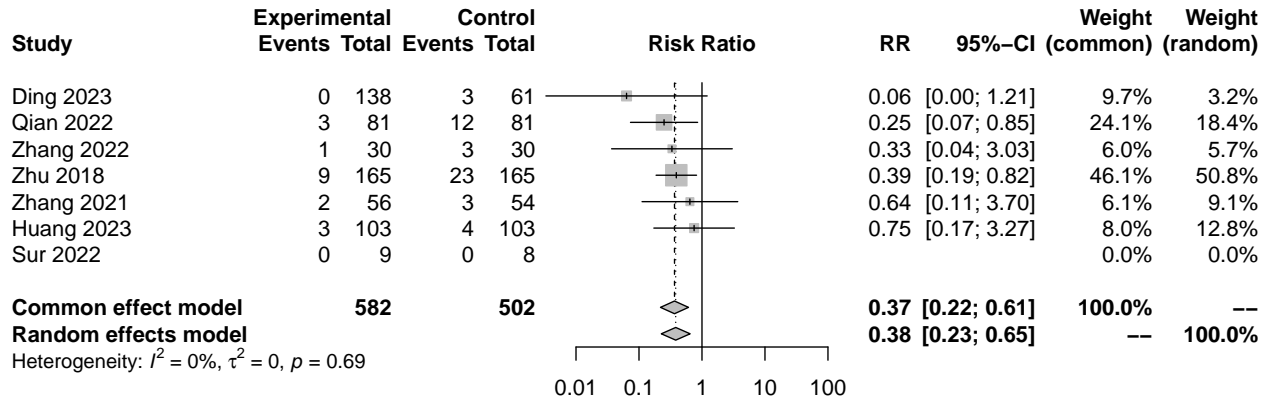



### 10.8.3 Trim and Fill

```
trimfill(fever_metabin)
```

```
## Warning in trimfill.meta(fever_metabin): 1 observation(s) dropped due to
## missing values

## Number of studies: k = 6 (with 0 added studies)
## Number of observations: o = 1067
## Number of events: e = 66
##
##                      RR          95%-CI      z p-value
## Random effects model 0.3830 [0.2261; 0.6487] -3.57  0.0004
##
## Quantifying heterogeneity:
## tau^2 = 0 [0.0000; 3.1138]; tau = 0 [0.0000; 1.7646]
## I^2 = 0.0% [0.0%; 74.6%]; H = 1.00 [1.00; 1.99]
##
## Test of heterogeneity:
##      Q d.f. p-value
## 3.05   5  0.6924
##
## Details on meta-analytical method:
## - Inverse variance method
## - Restricted maximum-likelihood estimator for tau^2
## - Q-Profile method for confidence interval of tau^2 and tau
## - Trim-and-fill method to adjust for funnel plot asymmetry (L-estimator)
```

```
forest(trimfill(fever_metabin),
       sortvar = TE)
```

```
## Warning in trimfill.meta(fever_metabin): 1 observation(s) dropped due to
## missing values
```

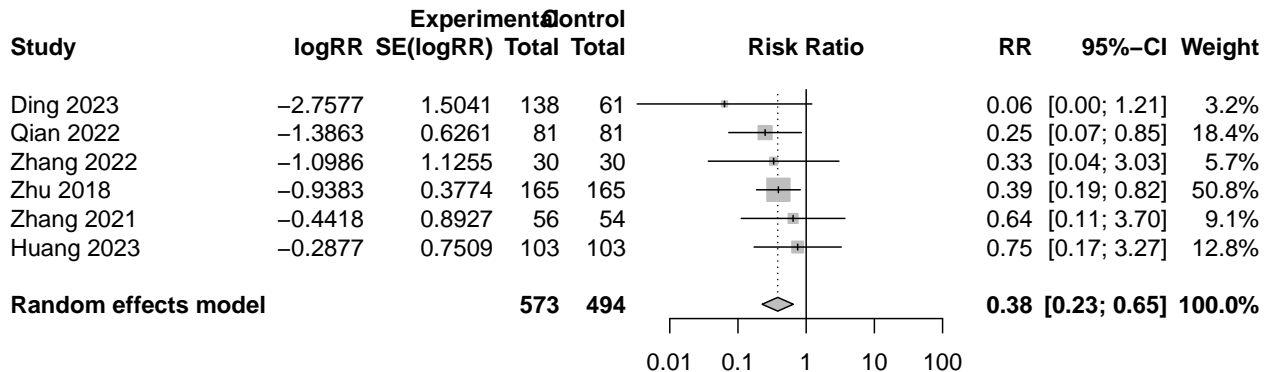

### 10.8.4 Funnel plot

```
funnel(trimfill(fever_metabin))
```

```
## Warning in trimfill.meta(fever_metabin): 1 observation(s) dropped due to  
## missing values
```

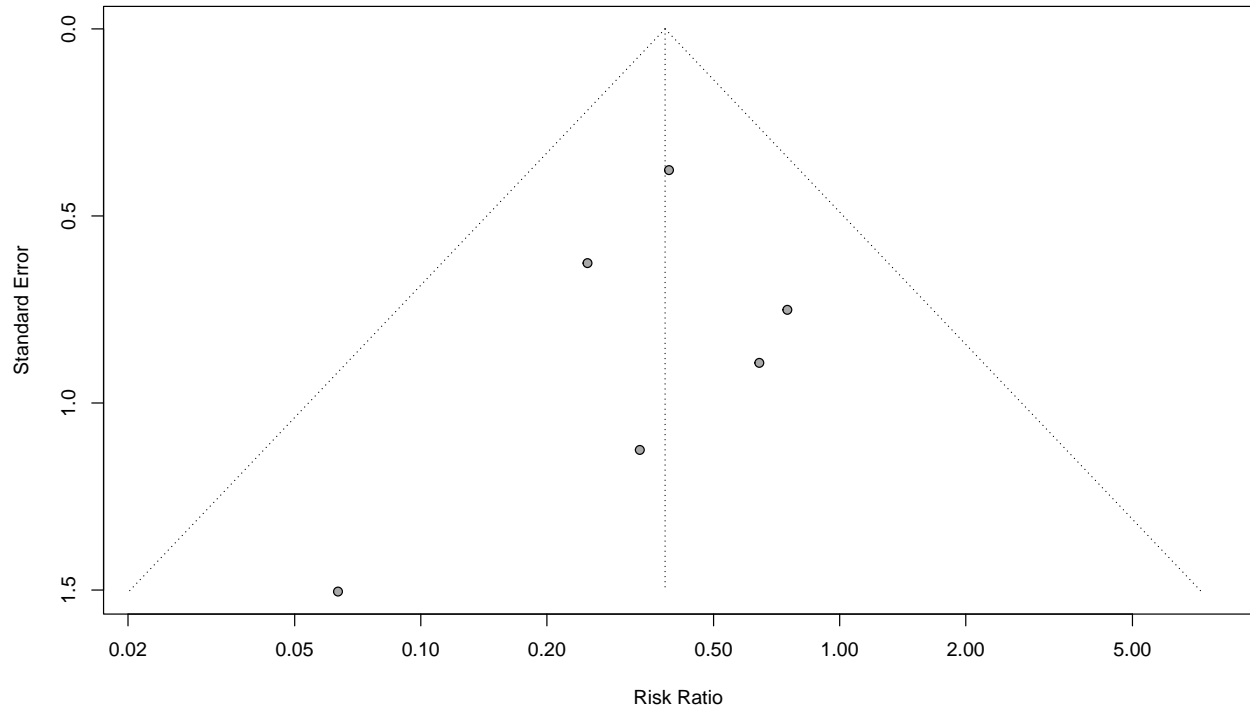

### 10.8.5 Baujat

```
baujat(fever_metabin, pos = 1)
```

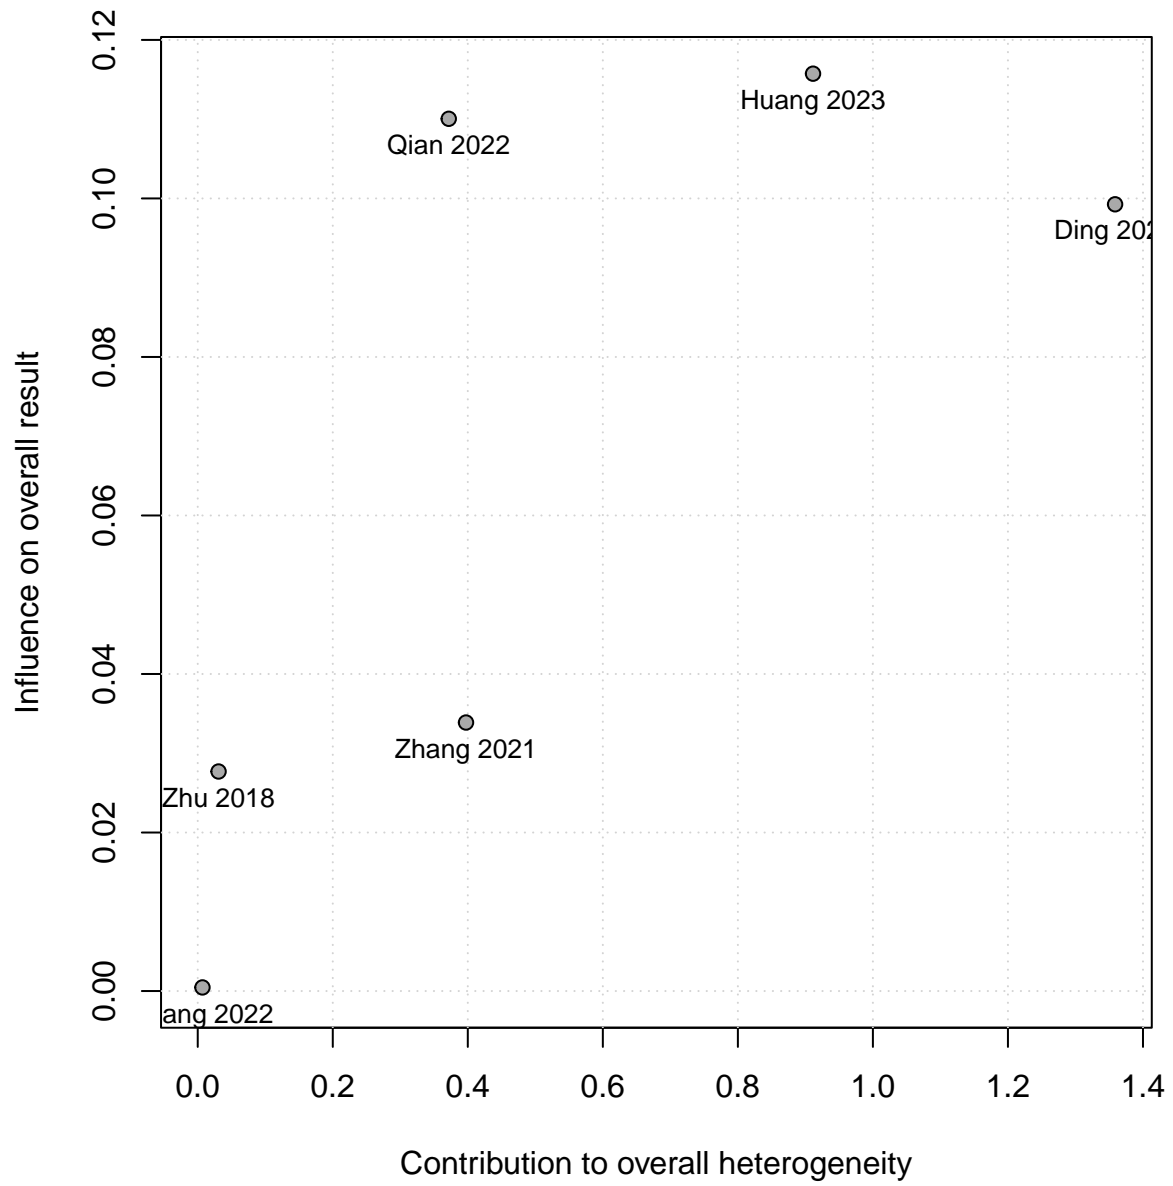

### 10.8.6 Leave one out

```
metainf(fever_metabin)
```

```
## Influential analysis (common effect model)
##
##           RR           95%-CI  p-value  tau^2    tau    I^2
## Omitting Sur 2022  0.3662 [0.2194; 0.6113]  0.0001  0.0000  0.0000  0.0%
## Omitting Zhu 2018  0.3447 [0.1693; 0.7021]  0.0033  0.0000  0.0000  0.0%
## Omitting Zhang 2021 0.3482 [0.2033; 0.5962]  0.0001  0.0000  0.0000  0.0%
## Omitting Huang 2023 0.3328 [0.1916; 0.5778] < 0.0001  0.0000  0.0000  0.0%
## Omitting Ding 2023  0.3987 [0.2349; 0.6767]  0.0007  0.0000  0.0000  0.0%
## Omitting Qian 2022  0.4030 [0.2289; 0.7096]  0.0016  0.0000  0.0000  0.0%
## Omitting Zhang 2022 0.3683 [0.2175; 0.6238]  0.0002  0.0000  0.0007  0.0%
##
## Pooled estimate    0.3662 [0.2194; 0.6113]  0.0001  0.0000  0.0000  0.0%
##
## Details on meta-analytical method:
## - Mantel-Haenszel method
## - Restricted maximum-likelihood estimator for tau^2
```

## 10.9 Infections

### 10.9.1 Meta-analysis

```
infection_metabin <- metabin(data = flexiurs_only,
                             event.c = infection_n_control,
                             n.c = sample_size_control,
                             event.e = infection_n_suction,
                             n.e = sample_size_suction,
                             studlab = author_year)

infection_metabin

## Number of studies: k = 7
## Number of observations: o = 1084
## Number of events: e = 67
##
##              RR          95%-CI      z  p-value
## Common effect model 0.3642 [0.2197; 0.6037] -3.92 < 0.0001
## Random effects model 0.3802 [0.2262; 0.6392] -3.65  0.0003
##
## Quantifying heterogeneity:
## tau^2 = 0 [0.0000; 1.6283]; tau = 0 [0.0000; 1.2760]
## I^2 = 0.0% [0.0%; 70.8%]; H = 1.00 [1.00; 1.85]
##
## Test of heterogeneity:
##      Q d.f. p-value
## 3.07   6 0.7995
##
## Details on meta-analytical method:
## - Mantel-Haenszel method
## - Inverse variance method
## - Restricted maximum-likelihood estimator for tau^2
## - Q-Profile method for confidence interval of tau^2 and tau
## - Continuity correction of 0.5 in studies with zero cell frequencies
```

### 10.9.2 Forest plot

```
forest(infection_metabin,
       sortvar = TE)
```

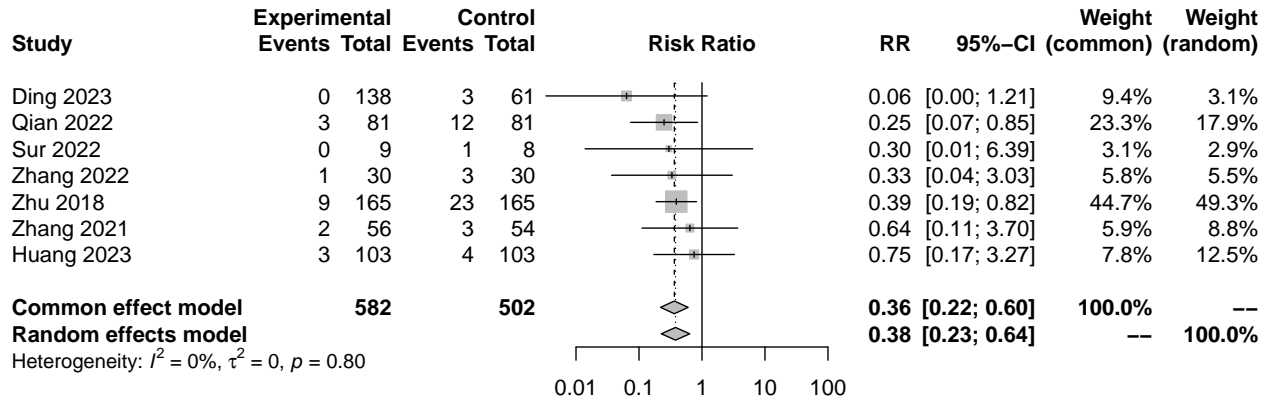

### 10.9.3 Trim and Fill

```
trimfill(infection_metabin)
```

```
## Number of studies: k = 8 (with 1 added studies)
## Number of observations: o = 1283
## Number of events: e = 70
##
##
##          RR          95%-CI      z p-value
## Random effects model 0.4027 [0.2414; 0.6716] -3.49 0.0005
##
## Quantifying heterogeneity:
## tau^2 = 0 [0.0000; 2.6099]; tau = 0 [0.0000; 1.6155]
## I^2 = 0.0% [0.0%; 67.6%]; H = 1.00 [1.00; 1.76]
##
## Test of heterogeneity:
##      Q d.f. p-value
## 4.63   7 0.7049
##
## Details on meta-analytical method:
## - Inverse variance method
## - Restricted maximum-likelihood estimator for tau^2
## - Q-Profile method for confidence interval of tau^2 and tau
## - Trim-and-fill method to adjust for funnel plot asymmetry (L-estimator)
forest(trimfill(infection_metabin),
        sortvar = TE)
```

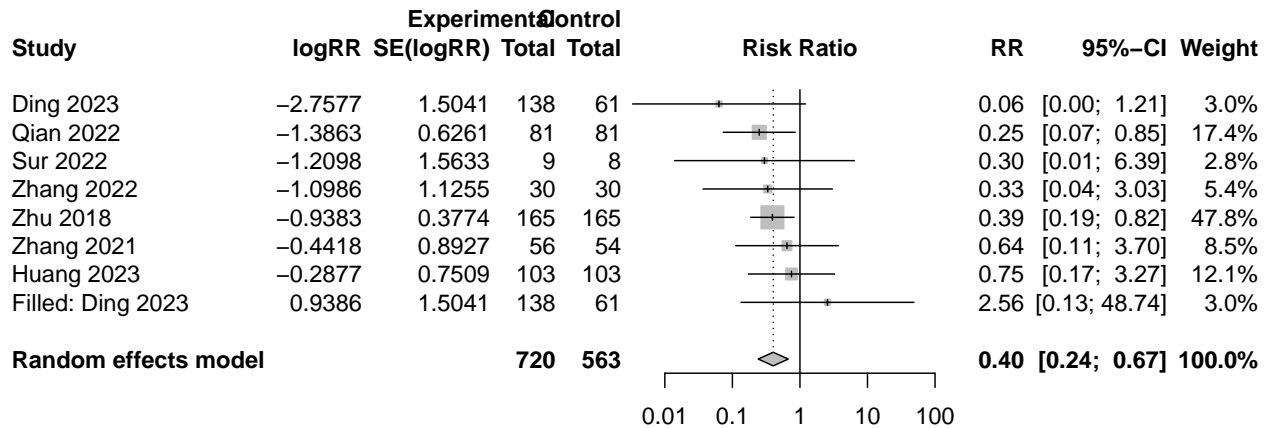

### 10.9.4 Funnel plot

```
funnel(trimfill(infection_metabin))
```

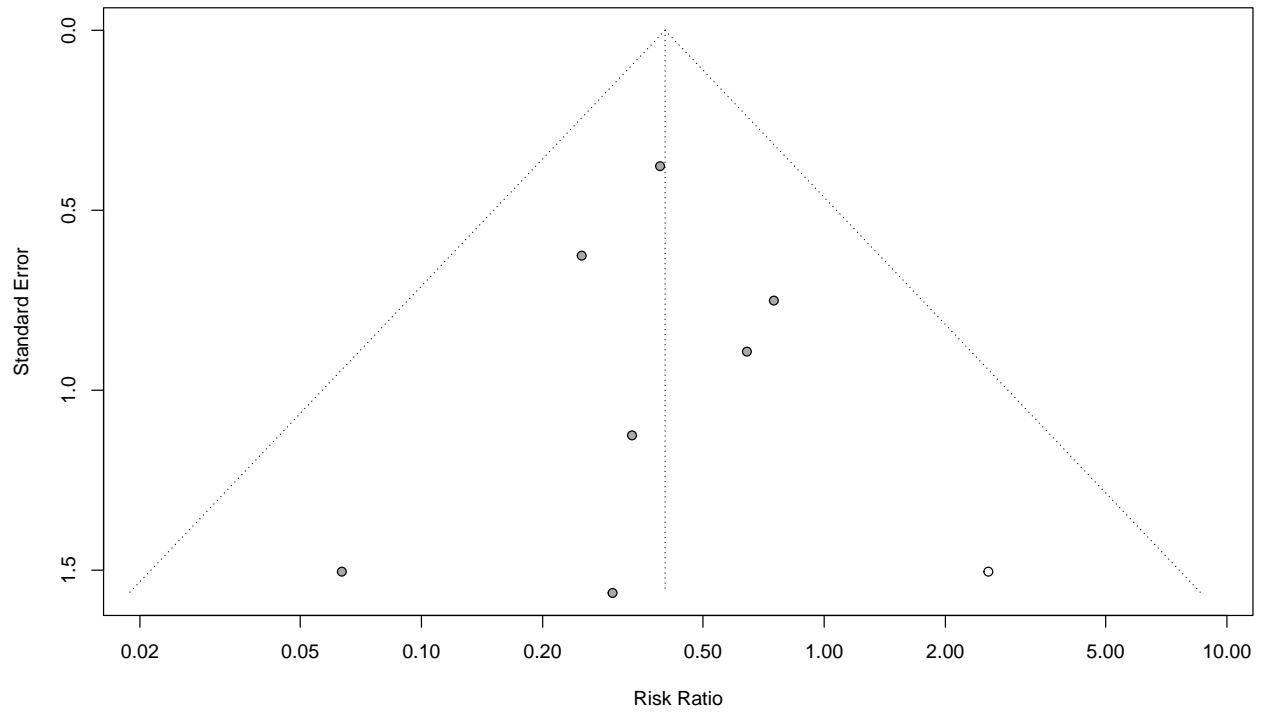



### 10.9.5 Baujat

```
baujat(infection_metabin, pos = 1)
```

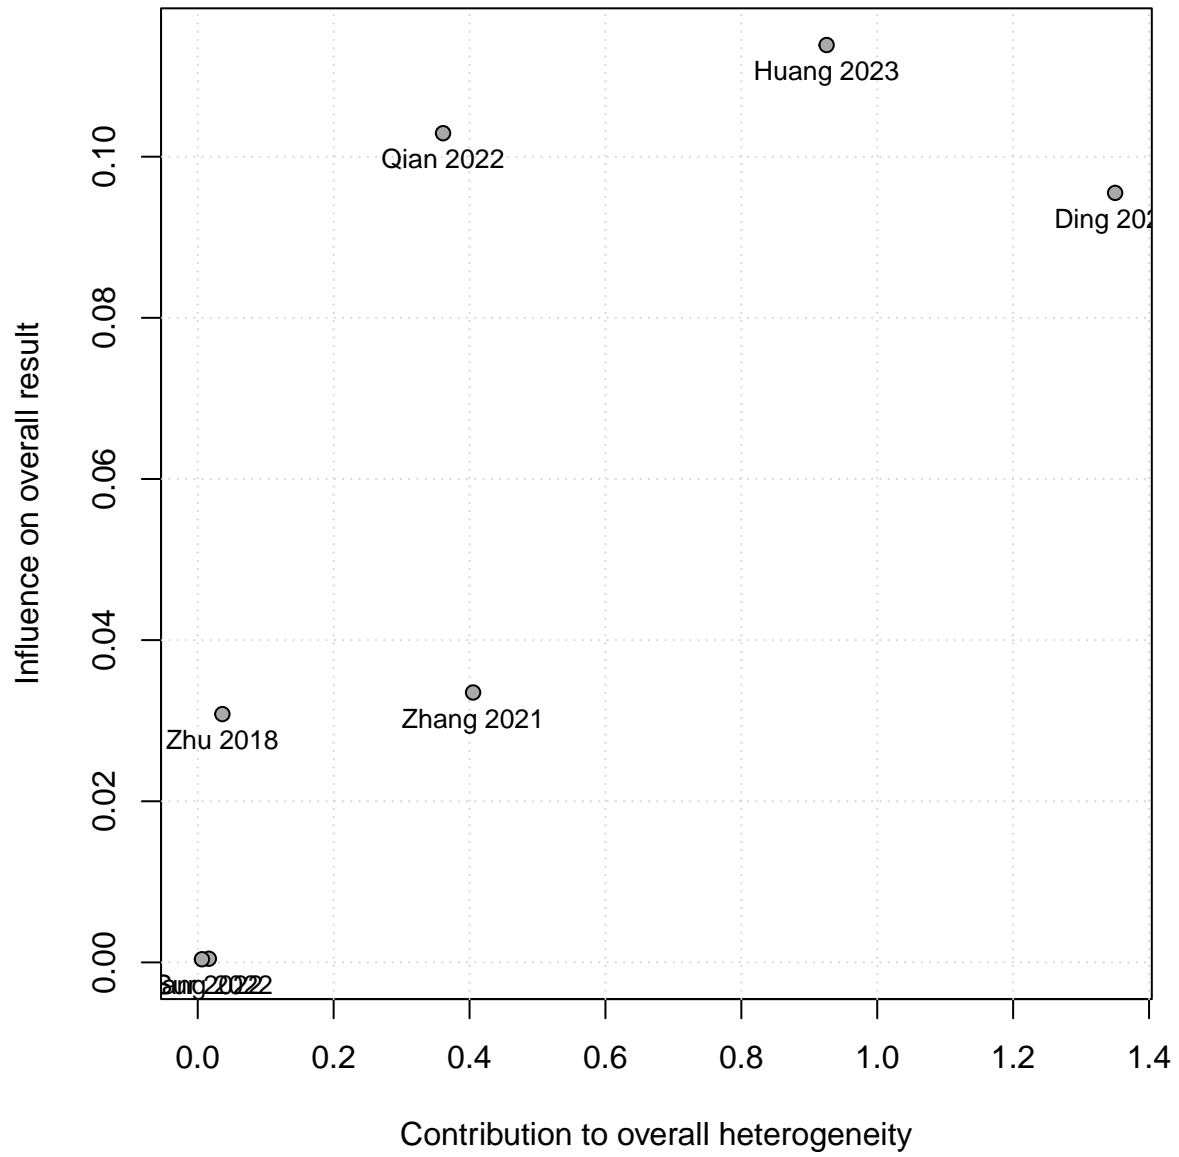

### 10.9.6 Leave one out

```
metainf(infection_metabin)
```

```
## Influential analysis (common effect model)
##
##           RR           95%-CI  p-value  tau^2    tau    I^2
## Omitting Sur 2022  0.3662 [0.2194; 0.6113]  0.0001  0.0000  0.0000  0.0%
## Omitting Zhu 2018  0.3423 [0.1712; 0.6843]  0.0024  0.0000  0.0000  0.0%
## Omitting Zhang 2021 0.3466 [0.2040; 0.5888] < 0.0001  0.0000  0.0000  0.0%
## Omitting Huang 2023 0.3317 [0.1927; 0.5709] < 0.0001  0.0000  0.0000  0.0%
## Omitting Ding 2023  0.3954 [0.2348; 0.6658]  0.0005  0.0000  0.0000  0.0%
## Omitting Qian 2022  0.3989 [0.2287; 0.6957]  0.0012  0.0000  0.0000  0.0%
## Omitting Zhang 2022 0.3661 [0.2178; 0.6153]  0.0001  0.0000  0.0000  0.0%
##
## Pooled estimate    0.3642 [0.2197; 0.6037] < 0.0001  0.0000  0.0000  0.0%
##
## Details on meta-analytical method:
## - Mantel-Haenszel method
## - Restricted maximum-likelihood estimator for tau^2
```

## 10.10 Sepsis

### 10.10.1 Meta-analysis

```
sepsis_metabin <- metabin(data = flexiurs_only,
                          event.c = sepsis_n_control,
                          n.c = sample_size_control,
                          event.e = sepsis_n_suction,
                          n.e = sample_size_suction,
                          studlab = author_year)

sepsis_metabin

## Number of studies: k = 1
## Number of observations: o = 1084
## Number of events: e = 14
##
##              RR          95%-CI      z p-value
## Common effect model 0.2727 [0.0775; 0.9598] -2.02 0.0430
## Random effects model 0.2727 [0.0775; 0.9598] -2.02 0.0430
##
## Quantifying heterogeneity:
## tau^2 = NA; tau = NA; I^2 = NA; H = NA
##
## Details on meta-analytical method:
## - Mantel-Haenszel method
## - Inverse variance method
## - Restricted maximum-likelihood estimator for tau^2
```

### 10.10.2 Forest plot

```
forest(sepsis_metabin,
       sortvar = TE)
```

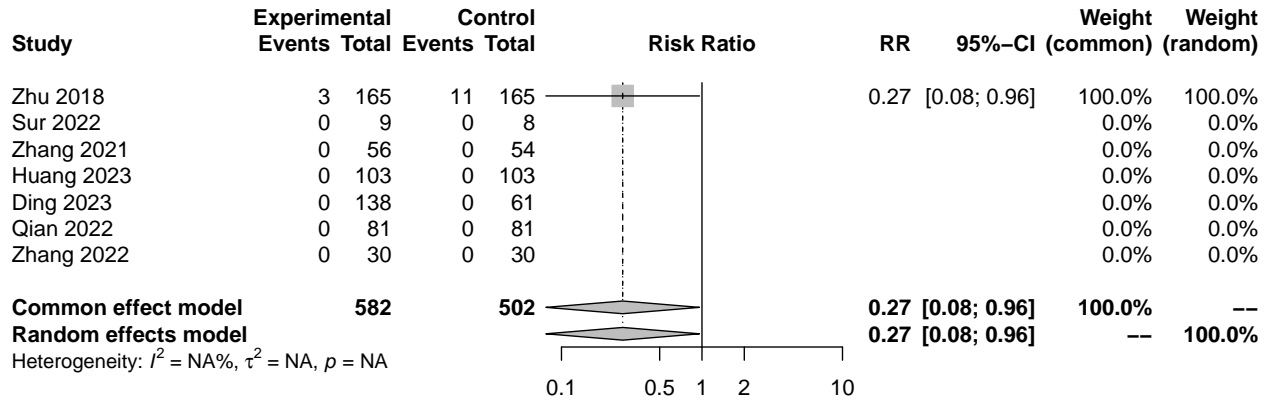

### 10.10.3 Trim and Fill

```
#trimfill(sepsis_metabin)  
#forest(trimfill(sepsis_metabin),  
#      sortvar = TE)
```

### 10.10.4 Funnel plot

```
funnel((sepsis_metabin))
```

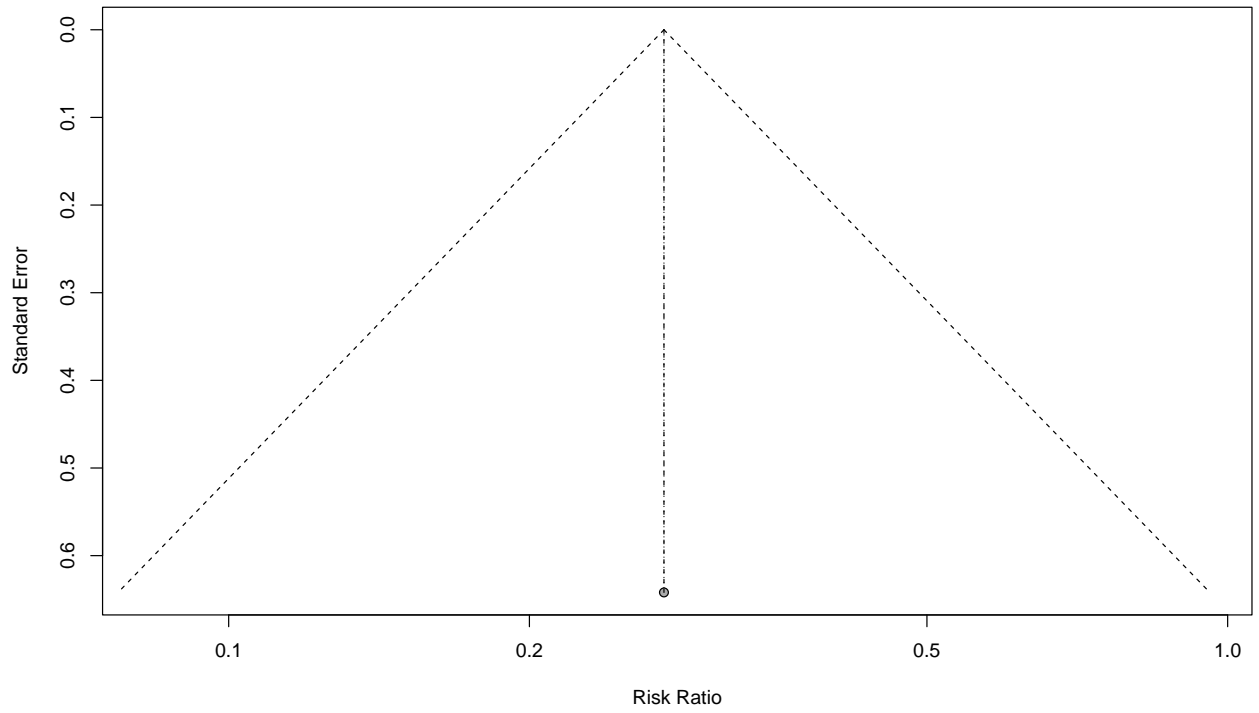

### 10.10.5 Baujat

```
baujat(sepsis_metabin, pos = 1)
```



### 10.10.6 Leave one out

```
metainf(sepsis_metabin)
```

```
## Influential analysis (common effect model)
##
##           RR           95%-CI p-value tau^2 tau I^2
## Omitting Sur 2022    0.2727 [0.0775; 0.9598] 0.0430
## Omitting Zhu 2018
## Omitting Zhang 2021 0.2727 [0.0775; 0.9598] 0.0430
## Omitting Huang 2023 0.2727 [0.0775; 0.9598] 0.0430
## Omitting Ding 2023  0.2727 [0.0775; 0.9598] 0.0430
## Omitting Qian 2022  0.2727 [0.0775; 0.9598] 0.0430
## Omitting Zhang 2022 0.2727 [0.0775; 0.9598] 0.0430
##
## Pooled estimate      0.2727 [0.0775; 0.9598] 0.0430
##
## Details on meta-analytical method:
## - Mantel-Haenszel method
## - Restricted maximum-likelihood estimator for tau^2
```



## 10.11 Abscess

### 10.11.1 Meta-analysis

```
abscess_metabin <- metabin(data = flexiurs_only,
                           event.c = abscess_n_control,
                           n.c = sample_size_control,
                           event.e = abscess_n_suction,
                           n.e = sample_size_suction,
                           studlab = author_year)

abscess_metabin

## Number of studies: k = 0
## Number of observations: o = 1084
## Number of events: e = 0
##
##                RR 95%-CI  z p-value
## Common effect model  NA      --      --
## Random effects model NA      --      --
##
## Quantifying heterogeneity:
## tau^2 = NA; tau = NA; I^2 = NA; H = NA
##
## Details on meta-analytical method:
## - Mantel-Haenszel method
## - Inverse variance method
## - Restricted maximum-likelihood estimator for tau^2
```

### 10.11.2 Forest plot

```
forest(abscess_metabin,
       sortvar = TE)
```

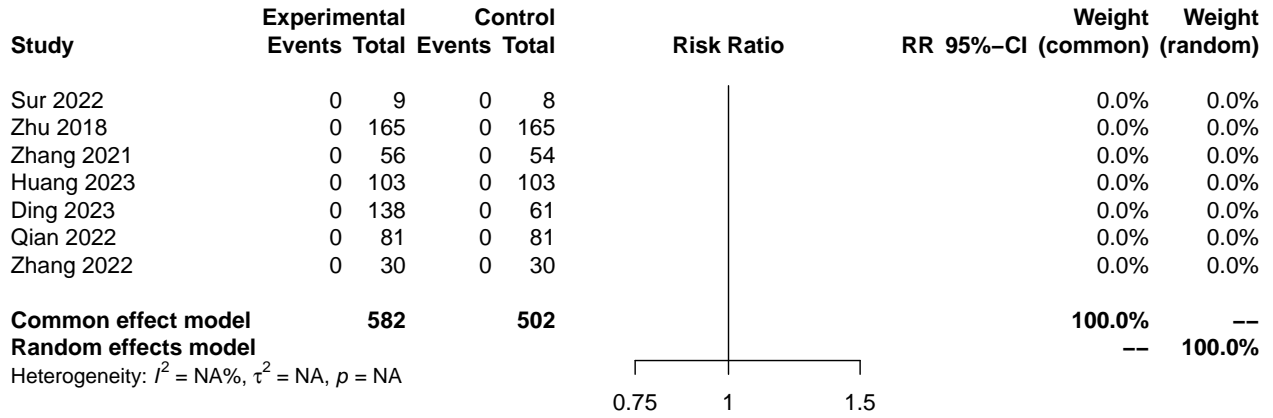

### 10.11.3 Trim and Fill

```
#trimfill(abscess_metabin)  
#forest(trimfill(abscess_metabin),  
#      sortvar = TE)
```

#### 10.11.4 Funnel plot

```
#funnel((abscess_metabin))
```

### 10.11.5 Baujat

```
#baujat(abscess_metabin, pos = 1)
```

### 10.11.6 Leave one out

```
#metainf(abscess_metabin)
```

## 10.12 Haematoma

### 10.12.1 Meta-analysis

```
haematoma_metabin <- metabin(data = flexiurs_only,
                             event.c = hematoma_n_control,
                             n.c = sample_size_control,
                             event.e = hematoma_n_suction,
                             n.e = sample_size_suction,
                             studlab = author_year)
```

```
haematoma_metabin
```

```
## Number of studies: k = 0
## Number of observations: o = 1084
## Number of events: e = 0
##
##                RR 95%-CI  z p-value
## Common effect model  NA      --      --
## Random effects model NA      --      --
##
## Quantifying heterogeneity:
## tau^2 = NA; tau = NA; I^2 = NA; H = NA
##
## Details on meta-analytical method:
## - Mantel-Haenszel method
## - Inverse variance method
## - Restricted maximum-likelihood estimator for tau^2
```

### 10.12.2 Forest plot

```
forest(haematoma_metabin,
       sortvar = TE)
```

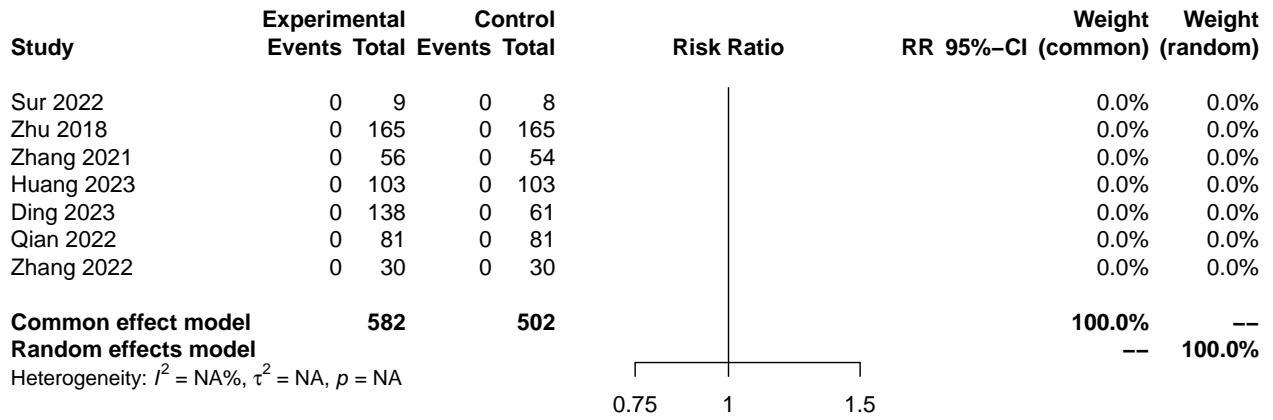



### 10.12.3 Trim and Fill

```
#trimfill(haematoma_metabin)  
#forest(trimfill(haematoma_metabin),  
#      sortvar = TE)
```

#### 10.12.4 Funnel plot

```
#funnel((haematoma_metabin))
```

### 10.12.5 Baujat

```
#baujat(haematoma_metabin, pos = 1)
```

### 10.12.6 Leave one out

```
#metainf(haematoma_metabin)
```

## 10.13 Pain

### 10.13.1 Meta-analysis

```
pain_metabin <- metabin(data = flexiurs_only,
                        event.c = pain_n_control,
                        n.c = sample_size_control,
                        event.e = pain_n_suction,
                        n.e = sample_size_suction,
                        studlab = author_year)

pain_metabin

## Number of studies: k = 0
## Number of observations: o = 1084
## Number of events: e = 0
##
##                RR 95%-CI  z p-value
## Common effect model  NA      --      --
## Random effects model NA      --      --
##
## Quantifying heterogeneity:
## tau^2 = NA; tau = NA; I^2 = NA; H = NA
##
## Details on meta-analytical method:
## - Mantel-Haenszel method
## - Inverse variance method
## - Restricted maximum-likelihood estimator for tau^2
```

### 10.13.2 Forest plot

```
forest(pain_metabin,
       sortvar = TE)
```

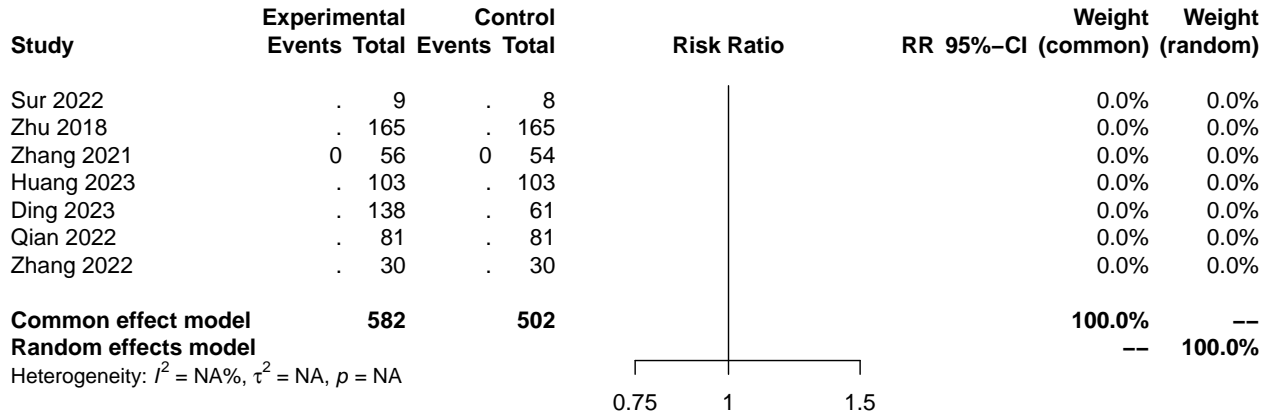

### 10.13.3 Trim and Fill

```
#trimfill(pain_metabin)  
#forest(trimfill(pain_metabin),  
#      sortvar = TE)
```

#### 10.13.4 Funnel plot

```
#funnel(trimfill(pain_metabin))
```



### 10.13.5 Baujat

```
#baujat(pain_metabin, pos = 1)
```

### 10.13.6 Leave one out

```
#metainf(pain_metabin, pos = 1)
```

## 10.14 Stricture

### 10.14.1 Meta-analysis

```
stricture_metabin <- metabin(data = flexiurs_only,
                             event.c = stricture_n_control,
                             n.c = sample_size_control,
                             event.e = stricture_n_suction,
                             n.e = sample_size_suction,
                             studlab = author_year)

stricture_metabin

## Number of studies: k = 1
## Number of observations: o = 1084
## Number of events: e = 1
##
##              RR          95%-CI    z p-value
## Common effect model 3.0000 [0.1231; 73.1112] 0.67 0.5001
## Random effects model 3.0000 [0.1231; 73.1096] 0.67 0.5001
##
## Quantifying heterogeneity:
## tau^2 = NA; tau = NA; I^2 = NA; H = NA
##
## Details on meta-analytical method:
## - Mantel-Haenszel method
## - Inverse variance method
## - Restricted maximum-likelihood estimator for tau^2
## - Continuity correction of 0.5 in studies with zero cell frequencies
```

### 10.14.2 Forest plot

```
forest(stricture_metabin,
       sortvar = TE)
```

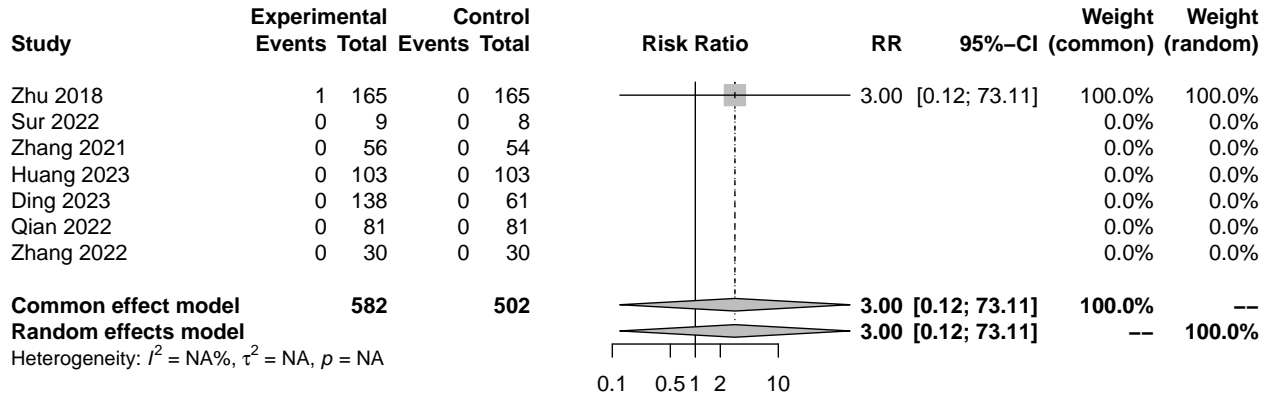

### 10.14.3 Trim and Fill

```
#trimfill(stricture_metabin)  
#forest(trimfill(stricture_metabin),  
#      sortvar = TE)
```

#### 10.14.4 Funnel plot

```
funnel((stricture_metabin))
```

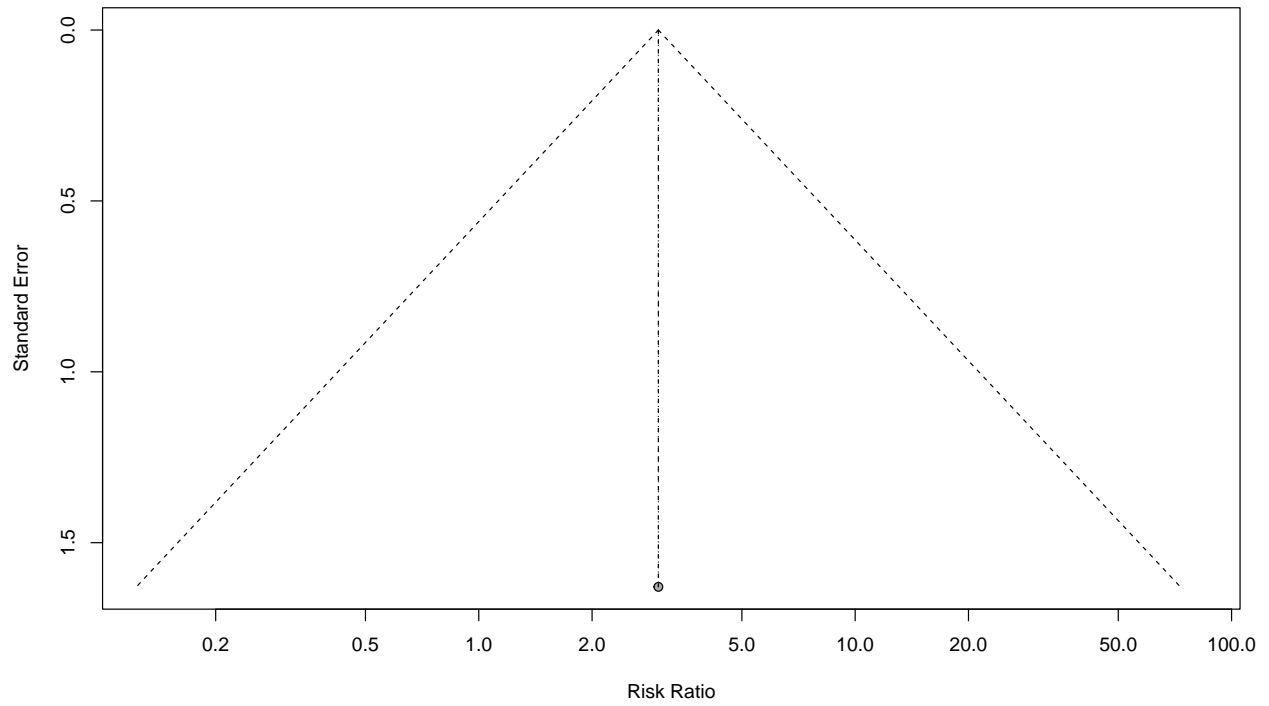

### 10.14.5 Baujat

```
baujat(stricture_metabin, pos = 1)
```



### 10.14.6 Leave one out

```
metainf(stricture_metabin)
```

```
## Influential analysis (common effect model)
##
##           RR           95%-CI p-value tau^2 tau I^2
## Omitting Sur 2022    3.0000 [0.1231; 73.1112]  0.5001
## Omitting Zhu 2018
## Omitting Zhang 2021  3.0000 [0.1231; 73.1112]  0.5001
## Omitting Huang 2023  3.0000 [0.1231; 73.1112]  0.5001
## Omitting Ding 2023   3.0000 [0.1231; 73.1112]  0.5001
## Omitting Qian 2022   3.0000 [0.1231; 73.1112]  0.5001
## Omitting Zhang 2022  3.0000 [0.1231; 73.1112]  0.5001
##
## Pooled estimate      3.0000 [0.1231; 73.1112]  0.5001
##
## Details on meta-analytical method:
## - Mantel-Haenszel method
## - Restricted maximum-likelihood estimator for tau^2
```



## 10.15 Embolisation required

### 10.15.1 Meta-analysis

```
ir_embolisation_metabin <- metabin(data = flexiurs_only,
                                   event.c = embolism_ir_intervention_n_control,
                                   n.c = sample_size_control,
                                   event.e = embolism_ir_intervention_n_suction,
                                   n.e = sample_size_suction,
                                   studlab = author_year)
ir_embolisation_metabin
```

```
## Number of studies: k = 0
## Number of observations: o = 1084
## Number of events: e = 0
##
##                RR 95%-CI  z p-value
## Common effect model  NA      --      --
## Random effects model NA      --      --
##
## Quantifying heterogeneity:
## tau^2 = NA; tau = NA; I^2 = NA; H = NA
##
## Details on meta-analytical method:
## - Mantel-Haenszel method
## - Inverse variance method
## - Restricted maximum-likelihood estimator for tau^2
```

### 10.15.2 Forest plot

```
forest(ir_embolisation_metabin,
       sortvar = TE)
```



### 10.15.3 Trim and Fill

```
#trimfill(ir_embolisation_metabin)  
#forest(trimfill(ir_embolisation_metabin),  
#      sortvar = TE)
```

#### 10.15.4 Funnel plot

```
#funnel((ir_embolisation_metabin))
```

### 10.15.5 Baujat

```
#baujat(ir_embolisation_metabin, pos = 1)
```

### 10.15.6 Leave one out

```
#metainf(ir_embolisation_metabin)
```

## 10.16 Transfusion

### 10.16.1 Meta-analysis

```
transfusion_metabin <- metabin(data = flexiurs_only,
                               event.c = transfusion_n_control,
                               n.c = sample_size_control,
                               event.e = transfusion_n_suction,
                               n.e = sample_size_suction,
                               studlab = author_year)

transfusion_metabin
```

```
## Number of studies: k = 0
## Number of observations: o = 1084
## Number of events: e = 0
##
##                RR 95%-CI  z p-value
## Common effect model  NA      --      --
## Random effects model NA      --      --
##
## Quantifying heterogeneity:
## tau^2 = NA; tau = NA; I^2 = NA; H = NA
##
## Details on meta-analytical method:
## - Mantel-Haenszel method
## - Inverse variance method
## - Restricted maximum-likelihood estimator for tau^2
```

### 10.16.2 Forest plot

```
forest(transfusion_metabin,
       sortvar = TE)
```





### 10.16.3 Trim and Fill

```
#trimfill(transfusion_metabin)  
#forest(trimfill(transfusion_metabin),  
#      sortvar = TE)
```

#### 10.16.4 Funnel plot

```
#funnel(trimfill(transfusion_metabin))
```

### 10.16.5 Baujat

```
#baujat(transfusion_metabin, pos = 1)
```

### 10.16.6 Leave one out

```
#metainf(transfusion_metabin)
```

## 10.17 Clavien I

### 10.17.1 Meta-analysis

```
clav_i_metabin <- metabin(data = flexiurs_only,
                          event.c = clavien_i_n_control,
                          n.c = sample_size_control,
                          event.e = clavien_i_n_suction,
                          n.e = sample_size_suction,
                          studlab = author_year)

clav_i_metabin

## Number of studies: k = 3
## Number of observations: o = 1084
## Number of events: e = 46
##
##              RR          95%-CI      z p-value
## Common effect model 0.5877 [0.3352; 1.0304] -1.86 0.0635
## Random effects model 0.5798 [0.3284; 1.0236] -1.88 0.0602
##
## Quantifying heterogeneity:
## tau^2 = 0 [0.0000; 28.9209]; tau = 0 [0.0000; 5.3778]
## I^2 = 0.0% [0.0%; 89.6%]; H = 1.00 [1.00; 3.10]
##
## Test of heterogeneity:
##   Q d.f. p-value
## 1.03  2 0.5974
##
## Details on meta-analytical method:
## - Mantel-Haenszel method
## - Inverse variance method
## - Restricted maximum-likelihood estimator for tau^2
## - Q-Profile method for confidence interval of tau^2 and tau
## - Continuity correction of 0.5 in studies with zero cell frequencies
```

### 10.17.2 Forest plot

```
forest(clav_i_metabin,
       sortvar = TE)
```

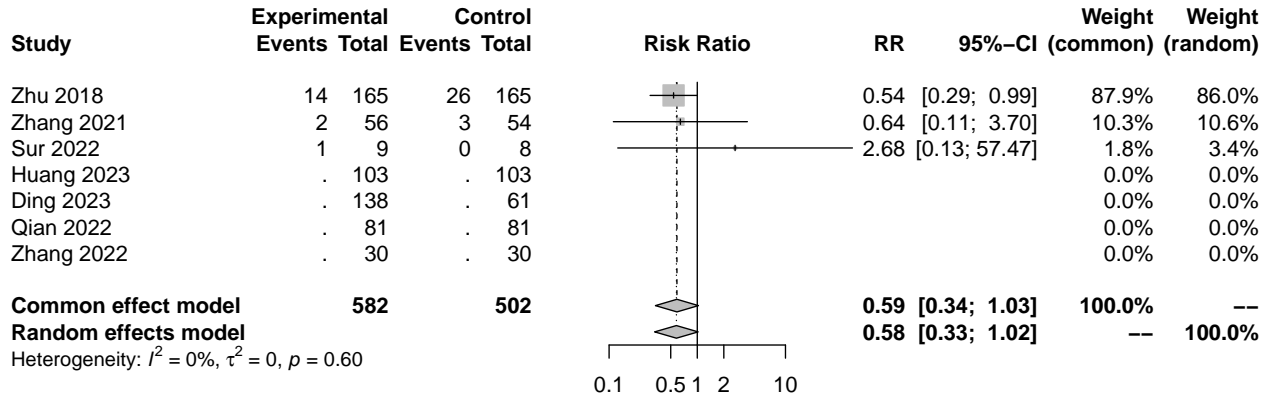

### 10.17.3 Trim and Fill

```
trimfill(clav_i_metabin)
```

```
## Warning in trimfill.meta(clav_i_metabin): 4 observation(s) dropped due to
## missing values

## Number of studies: k = 5 (with 2 added studies)
## Number of observations: o = 584
## Number of events: e = 52
##
##                      RR          95%-CI      z p-value
## Random effects model 0.5385 [0.3162; 0.9169] -2.28  0.0227
##
## Quantifying heterogeneity:
## tau^2 = 0 [0.0000; 8.3636]; tau = 0 [0.0000; 2.8920]
## I^2 = 0.0% [0.0%; 79.2%]; H = 1.00 [1.00; 2.19]
##
## Test of heterogeneity:
##      Q d.f. p-value
## 2.19   4  0.7007
##
## Details on meta-analytical method:
## - Inverse variance method
## - Restricted maximum-likelihood estimator for tau^2
## - Q-Profile method for confidence interval of tau^2 and tau
## - Trim-and-fill method to adjust for funnel plot asymmetry (L-estimator)
```

```
forest(trimfill(clav_i_metabin),
       sortvar = TE)
```

```
## Warning in trimfill.meta(clav_i_metabin): 4 observation(s) dropped due to
## missing values
```

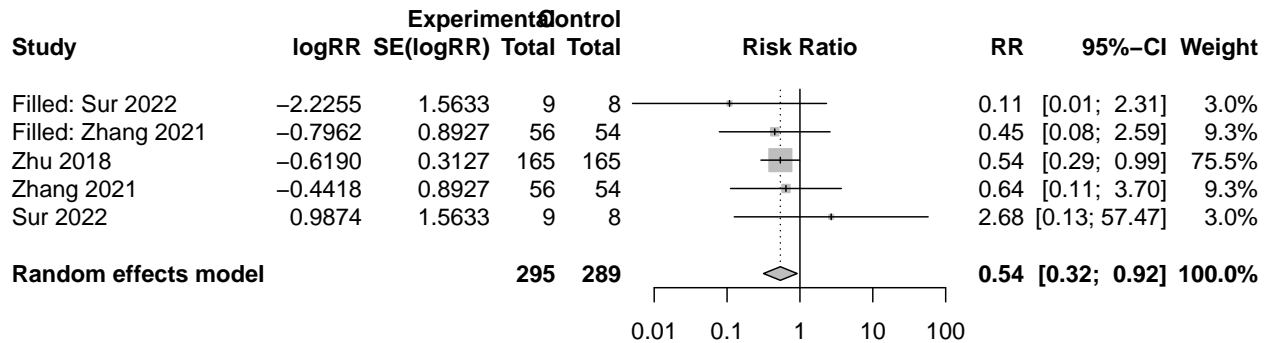

### 10.17.4 Funnel plot

```
funnel(trimfill(clav_i_metabin))
```

```
## Warning in trimfill.meta(clav_i_metabin): 4 observation(s) dropped due to  
## missing values
```

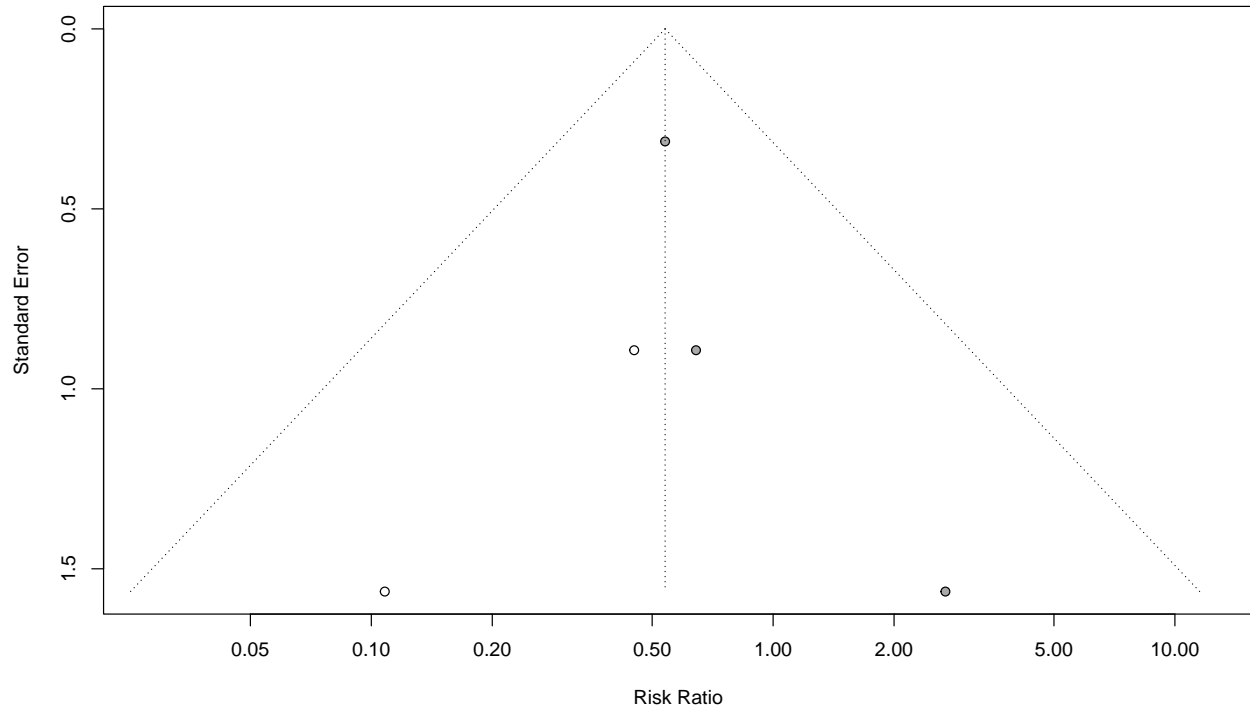



### 10.17.5 Baujat

```
baujat(clav_i_metabin, pos = 1)
```

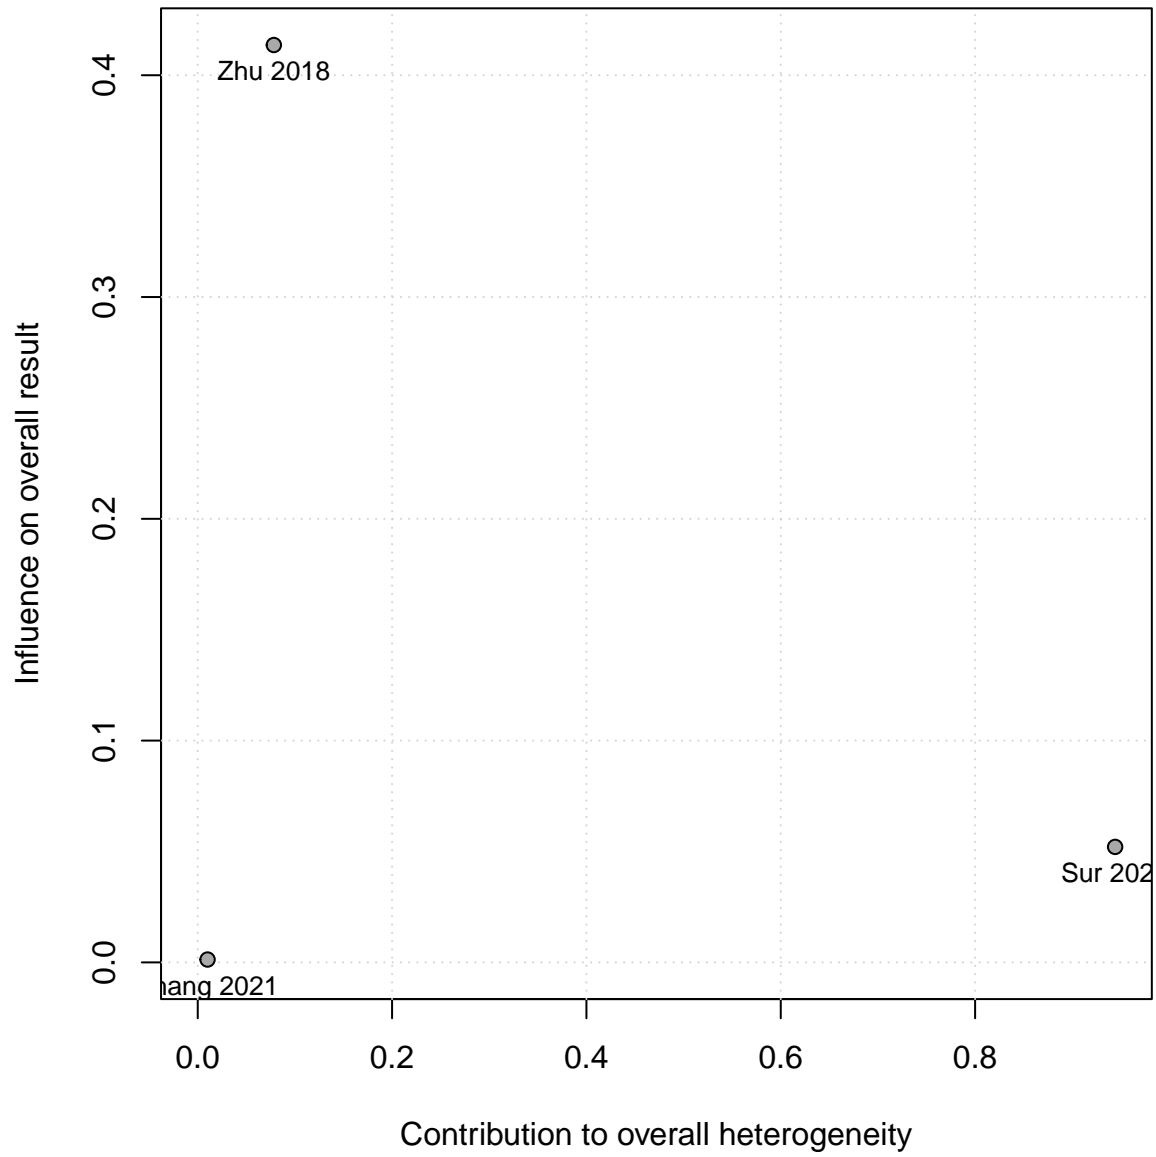

### 10.17.6 Leave one out

```
metainf(clav_i_metabin)
```

```
## Influential analysis (common effect model)
##
##           RR           95%-CI p-value   tau^2    tau    I^2
## Omitting Sur 2022    0.5494 [0.3082; 0.9796]  0.0424  0.0000  0.0000  0.0%
## Omitting Zhu 2018    0.9452 [0.2221; 4.0222]  0.9392  0.0000  0.0000  0.0%
## Omitting Zhang 2021  0.5813 [0.3213; 1.0517]  0.0729  0.0195  0.1398  1.5%
## Omitting Huang 2023  0.5877 [0.3352; 1.0304]  0.0635  0.0000  0.0000  0.0%
## Omitting Ding 2023  0.5877 [0.3352; 1.0304]  0.0635  0.0000  0.0000  0.0%
## Omitting Qian 2022   0.5877 [0.3352; 1.0304]  0.0635  0.0000  0.0000  0.0%
## Omitting Zhang 2022  0.5877 [0.3352; 1.0304]  0.0635  0.0000  0.0000  0.0%
##
## Pooled estimate      0.5877 [0.3352; 1.0304]  0.0635  0.0000  0.0000  0.0%
##
## Details on meta-analytical method:
## - Mantel-Haenszel method
## - Restricted maximum-likelihood estimator for tau^2
```

## 10.18 Clavien II

### 10.18.1 Meta-analysis

```
clav_ii_metabin <- metabin(data = flexiurs_only,
                           event.c = clavien_ii_n_control,
                           n.c = sample_size_control,
                           event.e = clavien_ii_n_suction,
                           n.e = sample_size_suction,
                           studlab = author_year)

clav_ii_metabin

## Number of studies: k = 2
## Number of observations: o = 1084
## Number of events: e = 15
##
##              RR          95%-CI      z p-value
## Common effect model 0.2762 [0.0861; 0.8853] -2.16 0.0304
## Random effects model 0.2763 [0.0863; 0.8847] -2.17 0.0303
##
## Quantifying heterogeneity:
## tau^2 = 0; tau = 0; I^2 = 0.0%; H = 1.00
##
## Test of heterogeneity:
##      Q d.f. p-value
## 0.00   1 0.9578
##
## Details on meta-analytical method:
## - Mantel-Haenszel method
## - Inverse variance method
## - Restricted maximum-likelihood estimator for tau^2
## - Continuity correction of 0.5 in studies with zero cell frequencies
```

### 10.18.2 Forest plot

```
forest(clav_ii_metabin,
       sortvar = TE)
```

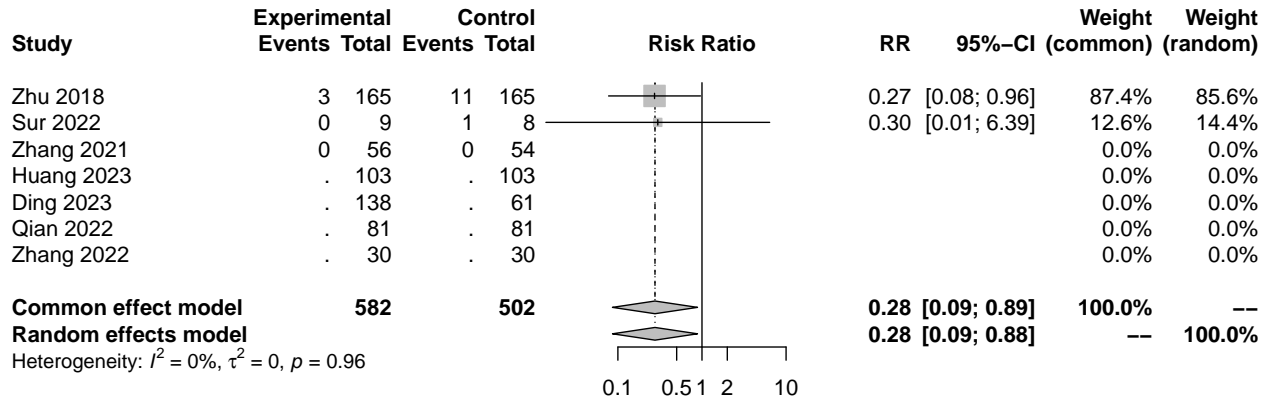

### 10.18.3 Trim and Fill

```
#trimfill(clav_ii_metabin)  
#forest(trimfill(clav_ii_metabin),  
#      sortvar = TE)
```

### 10.18.4 Funnel plot

```
funnel((clav_ii_metabin))
```

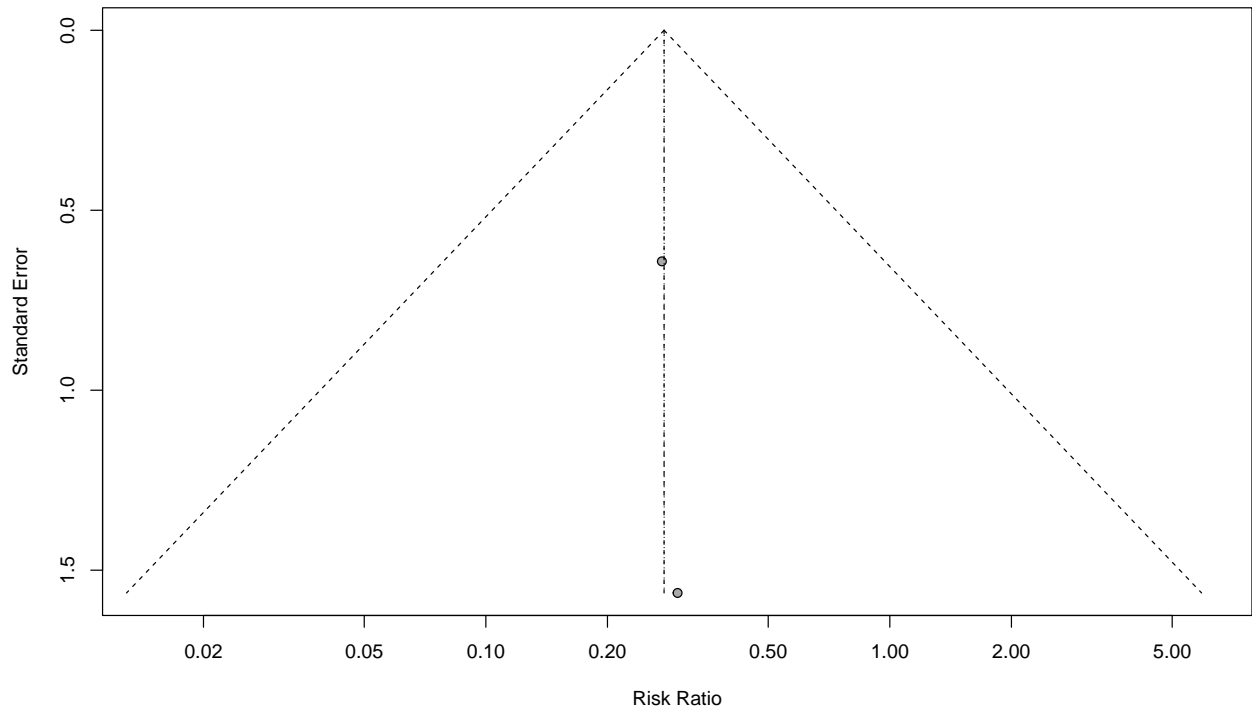

### 10.18.5 Baujat

```
baujat(clav_ii_metabin, pos = 1)
```

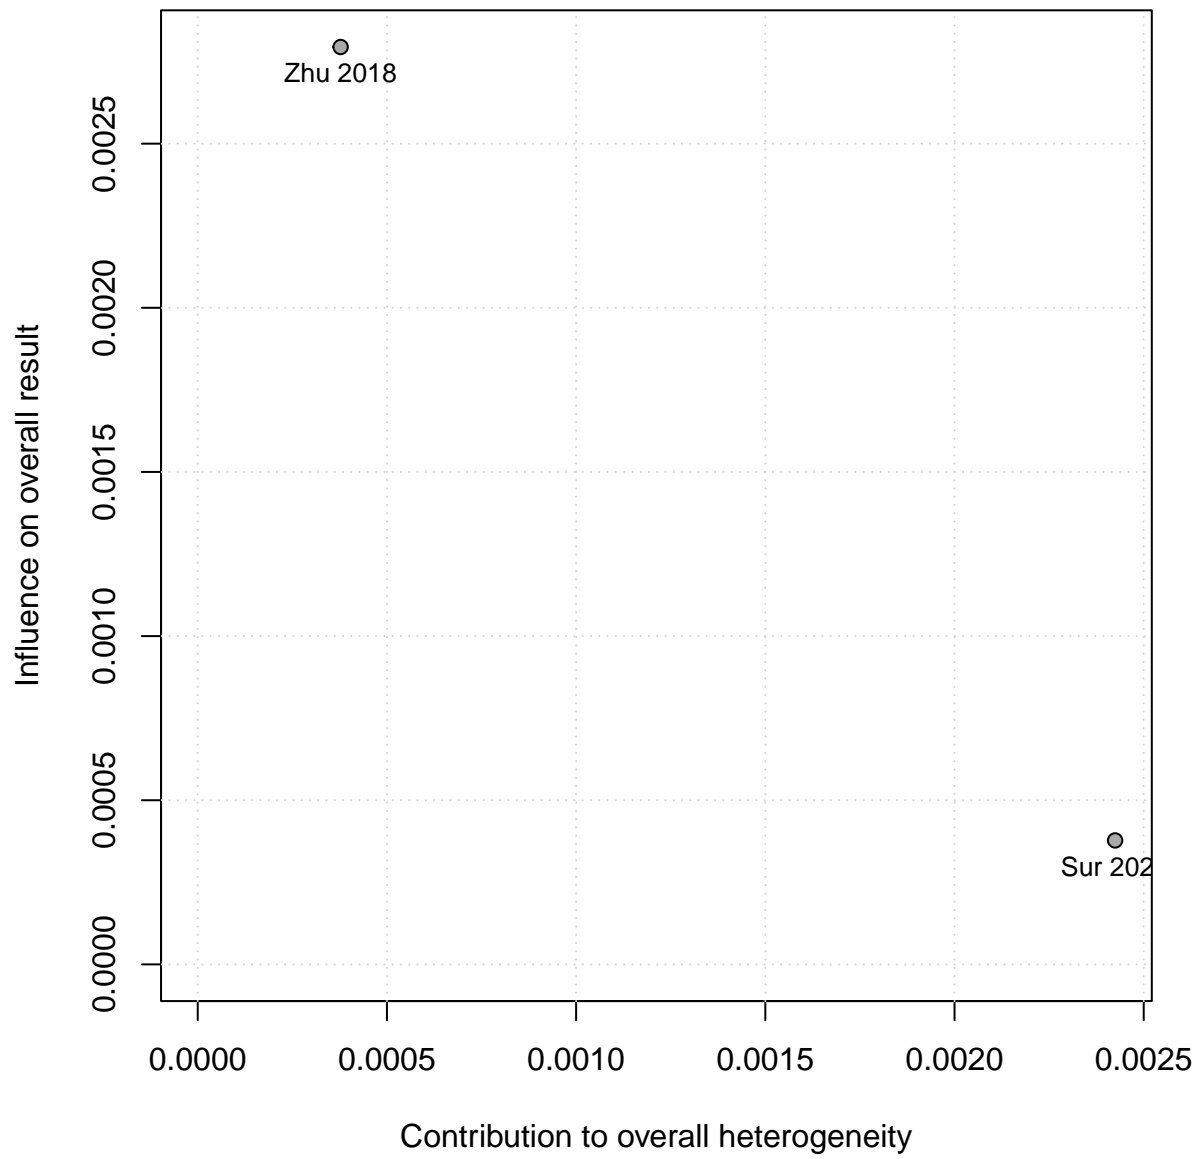

### 10.18.6 Leave one out

```
metainf(clav_ii_metabin)
```

```
## Influential analysis (common effect model)
##
##           RR           95%-CI p-value   tau^2     tau   I^2
## Omitting Sur 2022    0.2727 [0.0775; 0.9598]  0.0430
## Omitting Zhu 2018    0.3000 [0.0139; 6.4710]  0.4423
## Omitting Zhang 2021  0.2762 [0.0861; 0.8853]  0.0304  0.0000  0.0000  0.0%
## Omitting Huang 2023  0.2762 [0.0861; 0.8853]  0.0304  0.0000  0.0000  0.0%
## Omitting Ding 2023   0.2762 [0.0861; 0.8853]  0.0304  0.0000  0.0000  0.0%
## Omitting Qian 2022   0.2762 [0.0861; 0.8853]  0.0304  0.0000  0.0000  0.0%
## Omitting Zhang 2022  0.2762 [0.0861; 0.8853]  0.0304  0.0000  0.0000  0.0%
##
## Pooled estimate      0.2762 [0.0861; 0.8853]  0.0304  0.0000  0.0000  0.0%
##
## Details on meta-analytical method:
## - Mantel-Haenszel method
## - Restricted maximum-likelihood estimator for tau^2
```



## 10.19 Clavien III

### 10.19.1 Meta-analysis

```
clav_iii_metabin <- metabin(data = flexiurs_only,
                             event.c = clavien_iii_n_control,
                             n.c = sample_size_control,
                             event.e = clavien_iii_n_suction,
                             n.e = sample_size_suction,
                             studlab = author_year)

clav_iii_metabin

## Number of studies: k = 1
## Number of observations: o = 1084
## Number of events: e = 2
##
##              RR          95%-CI    z p-value
## Common effect model 1.0000 [0.0631; 15.8536] 0.00 1.0000
## Random effects model 1.0000 [0.0631; 15.8536] 0.00 1.0000
##
## Quantifying heterogeneity:
## tau^2 = NA; tau = NA; I^2 = NA; H = NA
##
## Details on meta-analytical method:
## - Mantel-Haenszel method
## - Inverse variance method
## - Restricted maximum-likelihood estimator for tau^2
```

### 10.19.2 Forest plot

```
forest(clav_iii_metabin,
       sortvar = TE)
```

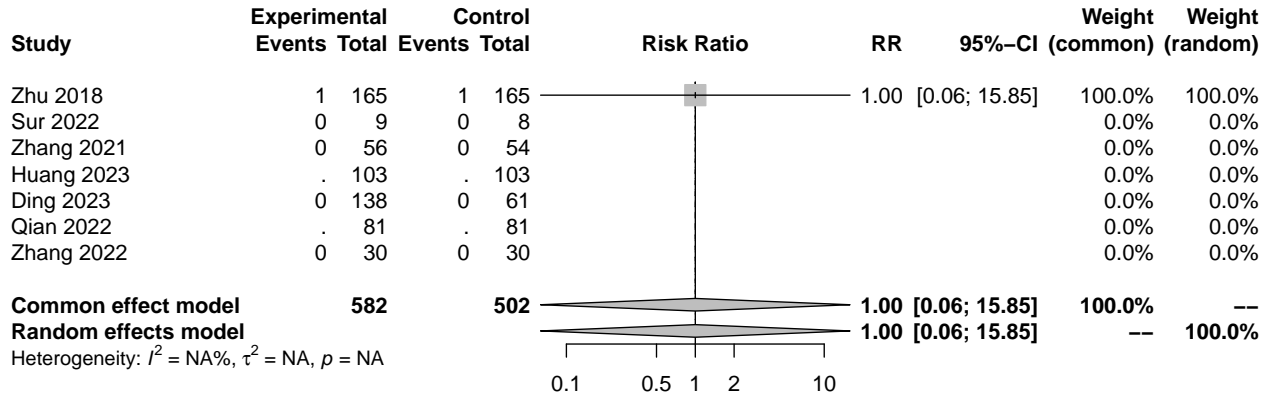

### 10.19.3 Trim and Fill

```
#trimfill(clav_iii_metabin)  
#forest(trimfill(clav_iii_metabin),  
#      sortvar = TE)
```

#### 10.19.4 Funnel plot

```
#funnel(trimfill(clav_iii_metabin))
```

### 10.19.5 Baujat

```
#baujat(clav_iii_metabin, pos = 1)
```

### 10.19.6 Leave one out

```
#metainf(clav_iii_metabin)
```

## 10.20 Clavien IV

### 10.20.1 Meta-analysis

```
clav_iv_metabin <- metabin(data = flexiurs_only,
                           event.c = clavien_iv_n_control,
                           n.c = sample_size_control,
                           event.e = clavien_iv_n_suction,
                           n.e = sample_size_suction,
                           studlab = author_year)

clav_iv_metabin

## Number of studies: k = 1
## Number of observations: o = 1084
## Number of events: e = 4
##
##              RR          95%-CI      z p-value
## Common effect model 0.3333 [0.0350; 3.1716] -0.96 0.3392
## Random effects model 0.3333 [0.0350; 3.1716] -0.96 0.3392
##
## Quantifying heterogeneity:
## tau^2 = NA; tau = NA; I^2 = NA; H = NA
##
## Details on meta-analytical method:
## - Mantel-Haenszel method
## - Inverse variance method
## - Restricted maximum-likelihood estimator for tau^2
```

### 10.20.2 Forest plot

```
forest(clav_iv_metabin,
       sortvar = TE)
```

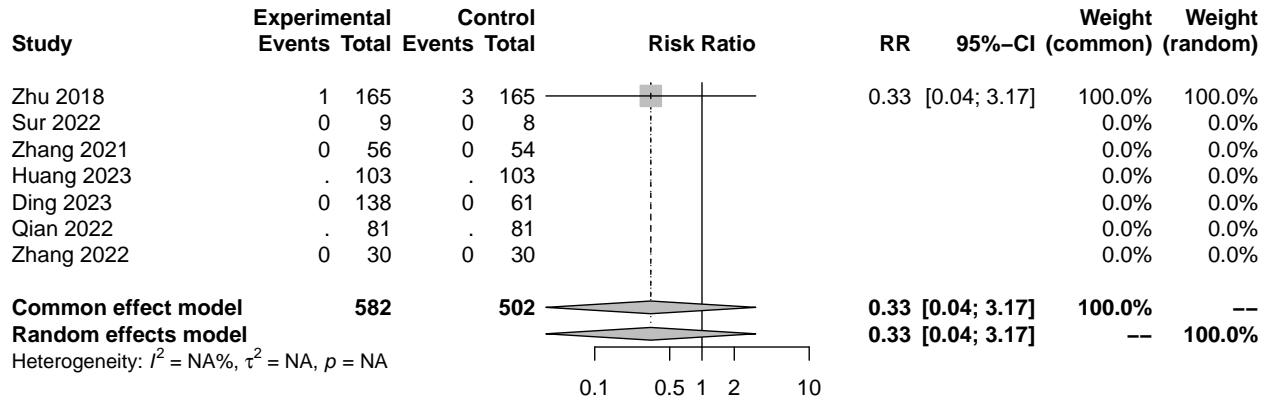



### 10.20.3 Trim and Fill

```
#trimfill(clav_iv_metabin)  
#forest(trimfill(clav_iv_metabin),  
#      sortvar = TE)
```

### 10.20.4 Funnel plot

```
funnel((clav_iv_metabin))
```



### 10.20.5 Baujat

```
baujat(clav_iv_metabin, pos = 1)
```



### 10.20.6 Leave one out

```
metainf(clav_iv_metabin)
```

```
## Influential analysis (common effect model)
##
##           RR           95%-CI p-value tau^2 tau I^2
## Omitting Sur 2022    0.3333 [0.0350; 3.1716] 0.3392
## Omitting Zhu 2018
## Omitting Zhang 2021 0.3333 [0.0350; 3.1716] 0.3392
## Omitting Huang 2023 0.3333 [0.0350; 3.1716] 0.3392
## Omitting Ding 2023  0.3333 [0.0350; 3.1716] 0.3392
## Omitting Qian 2022  0.3333 [0.0350; 3.1716] 0.3392
## Omitting Zhang 2022 0.3333 [0.0350; 3.1716] 0.3392
##
## Pooled estimate      0.3333 [0.0350; 3.1716] 0.3392
##
## Details on meta-analytical method:
## - Mantel-Haenszel method
## - Restricted maximum-likelihood estimator for tau^2
```

## 10.21 Clavien V

### 10.21.1 Meta-analysis

```
clav_v_metabin <- metabin(data = flexiurs_only,
                          event.c = clavien_v_n_control,
                          n.c = sample_size_control,
                          event.e = clavien_v_n_suction,
                          n.e = sample_size_suction,
                          studlab = author_year)

clav_v_metabin
```

```
## Number of studies: k = 0
## Number of observations: o = 1084
## Number of events: e = 0
##
##                RR 95%-CI  z p-value
## Common effect model  NA      --      --
## Random effects model NA      --      --
##
## Quantifying heterogeneity:
## tau^2 = NA; tau = NA; I^2 = NA; H = NA
##
## Details on meta-analytical method:
## - Mantel-Haenszel method
## - Inverse variance method
## - Restricted maximum-likelihood estimator for tau^2
```

### 10.21.2 Forest plot

```
#forest(clav_v_metabin,  
#       sortvar = TE)
```

### 10.21.3 Trim and Fill

```
#trimfill(clav_v_metabin)  
#forest(trimfill(clav_v_metabin),  
#      sortvar = TE)
```

#### 10.21.4 Funnel plot

```
#funnel(trimfill(clav_v_metabin))
```



### 10.21.5 Baujat

```
#baujat(clav_v_metabin, pos = 1)
```

### 10.21.6 Leave one out

```
#metainf(clav_v_metabin)
```

## 10.22 Clavien I-II

### 10.22.1 Meta-analysis

```
clav_i_ii_metabin <- metabin(data = flexiurs_only,
                             event.c = clav_i_ii_n_control,
                             n.c = sample_size_control,
                             event.e = clav_i_ii_n_suction,
                             n.e = sample_size_suction,
                             studlab = author_year)

clav_i_ii_metabin

## Number of studies: k = 3
## Number of observations: o = 1084
## Number of events: e = 61
##
##              RR          95%-CI      z p-value
## Common effect model 0.4841 [0.2941; 0.7969] -2.85 0.0043
## Random effects model 0.4838 [0.2936; 0.7975] -2.85 0.0044
##
## Quantifying heterogeneity:
## tau^2 = 0 [0.0000; 3.4477]; tau = 0 [0.0000; 1.8568]
## I^2 = 0.0% [0.0%; 89.6%]; H = 1.00 [1.00; 3.10]
##
## Test of heterogeneity:
##      Q d.f. p-value
## 0.35   2 0.8406
##
## Details on meta-analytical method:
## - Mantel-Haenszel method
## - Inverse variance method
## - Restricted maximum-likelihood estimator for tau^2
## - Q-Profile method for confidence interval of tau^2 and tau
```

### 10.22.2 Forest plot

```
forest(clav_i_ii_metabin,
       sortvar = TE)
```

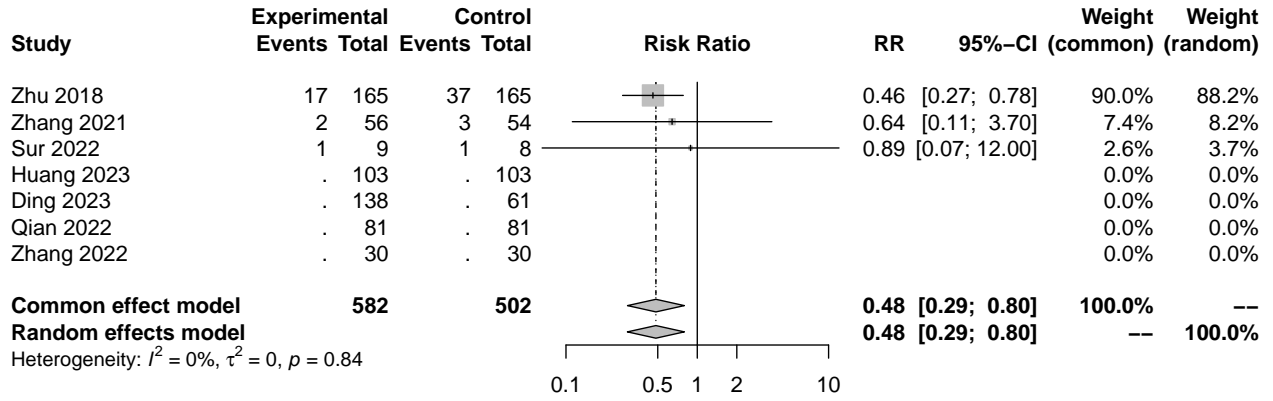

### 10.22.3 Trim and Fill

```
trimfill(clav_i_ii_metabin)
```

```
## Warning in trimfill.meta(clav_i_ii_metabin): 4 observation(s) dropped due to
## missing values
```

```
## Number of studies: k = 5 (with 2 added studies)
## Number of observations: o = 584
## Number of events: e = 68
##
##                RR          95%-CI      z p-value
## Random effects model 0.4595 [0.2864; 0.7370] -3.23  0.0013
##
## Quantifying heterogeneity:
## tau^2 = 0 [0.0000; 0.7846]; tau = 0 [0.0000; 0.8858]
## I^2 = 0.0% [0.0%; 79.2%]; H = 1.00 [1.00; 2.19]
##
## Test of heterogeneity:
##      Q d.f. p-value
## 0.78   4  0.9415
##
## Details on meta-analytical method:
## - Inverse variance method
## - Restricted maximum-likelihood estimator for tau^2
## - Q-Profile method for confidence interval of tau^2 and tau
## - Trim-and-fill method to adjust for funnel plot asymmetry (L-estimator)
```

```
forest(trimfill(clav_i_ii_metabin),
        sortvar = TE)
```

```
## Warning in trimfill.meta(clav_i_ii_metabin): 4 observation(s) dropped due to
## missing values
```

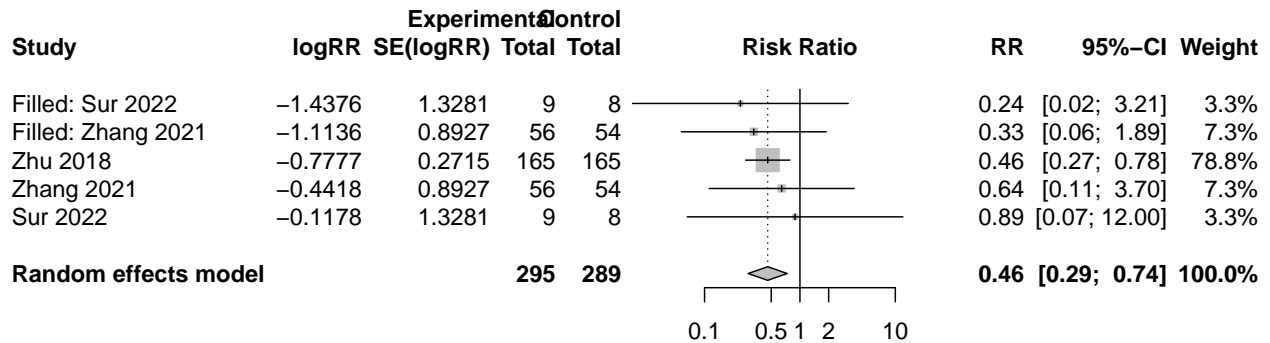

## 10.22.4 Funnel plot

```
funnel(trimfill(clav_i_ii_metabin))
```

```
## Warning in trimfill.meta(clav_i_ii_metabin): 4 observation(s) dropped due to  
## missing values
```

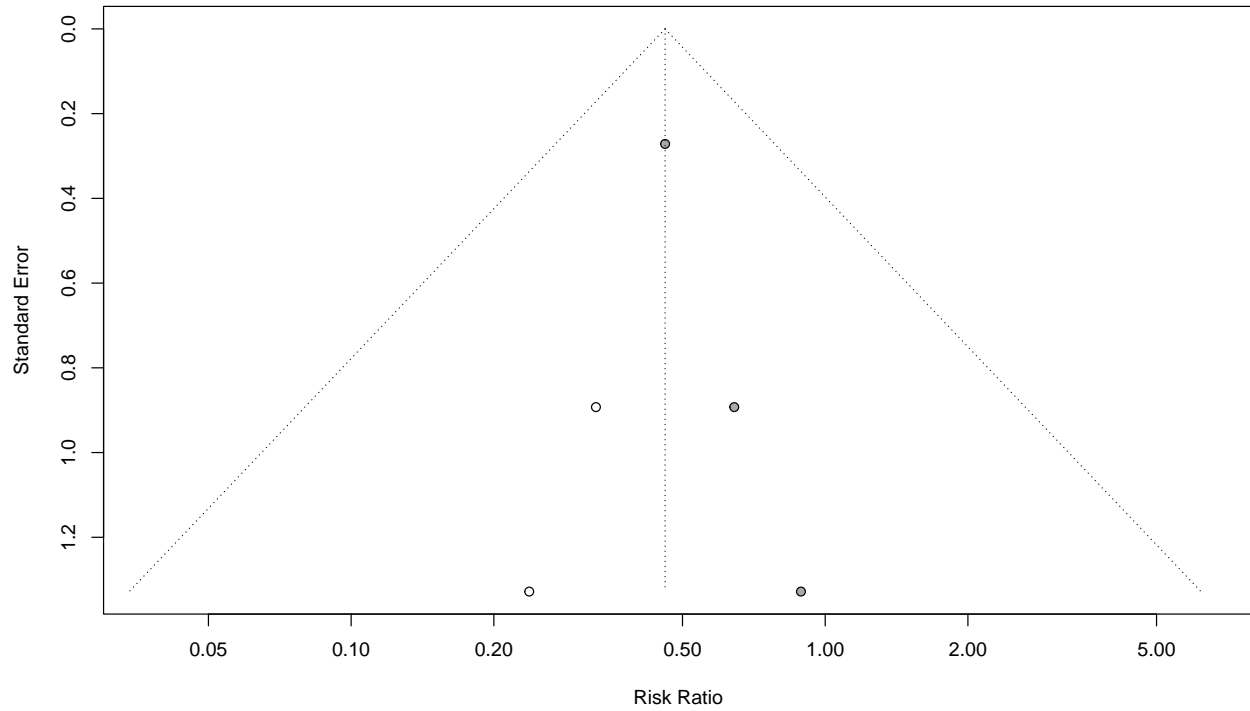

### 10.22.5 Baujat

```
baujat(clav_i_ii_metabin, pos = 1)
```

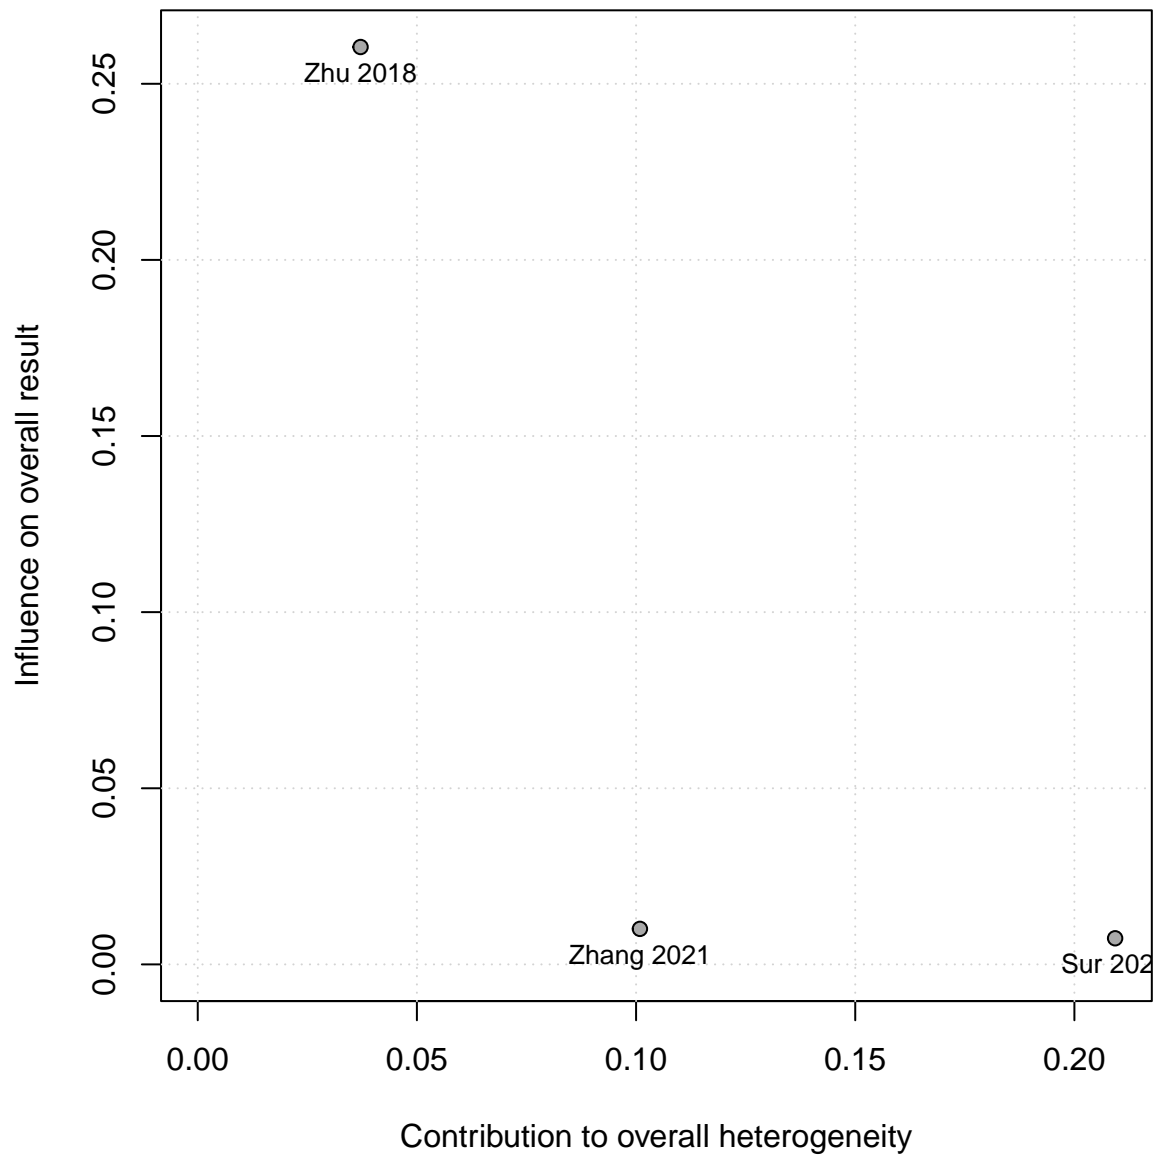

### 10.22.6 Leave one out

```
metainf(clav_i_ii_metabin)
```

```
## Influential analysis (common effect model)
##
##           RR           95%-CI p-value  tau^2    tau    I^2
## Omitting Sur 2022    0.4734 [0.2847; 0.7874]  0.0040  0.0000  0.0000  0.0%
## Omitting Zhu 2018    0.7062 [0.1657; 3.0100]  0.6382  0.0000  0.0000  0.0%
## Omitting Zhang 2021  0.4714 [0.2802; 0.7932]  0.0046  0.0000  0.0000  0.0%
## Omitting Huang 2023  0.4841 [0.2941; 0.7969]  0.0043  0.0000  0.0000  0.0%
## Omitting Ding 2023   0.4841 [0.2941; 0.7969]  0.0043  0.0000  0.0000  0.0%
## Omitting Qian 2022   0.4841 [0.2941; 0.7969]  0.0043  0.0000  0.0000  0.0%
## Omitting Zhang 2022  0.4841 [0.2941; 0.7969]  0.0043  0.0000  0.0000  0.0%
##
## Pooled estimate      0.4841 [0.2941; 0.7969]  0.0043  0.0000  0.0000  0.0%
##
## Details on meta-analytical method:
## - Mantel-Haenszel method
## - Restricted maximum-likelihood estimator for tau^2
```



## 10.23 Clavien III-V

### 10.23.1 Meta-analysis

```
clav_iii_v_metabin <- metabin(data = flexiurs_only,
                              event.c = clav_iii_v_n_control,
                              n.c = sample_size_control,
                              event.e = clav_iii_v_n_suction,
                              n.e = sample_size_suction,
                              studlab = author_year)

clav_iii_v_metabin

## Number of studies: k = 1
## Number of observations: o = 1084
## Number of events: e = 6
##
##              RR          95%-CI      z p-value
## Common effect model 0.5000 [0.0929; 2.6925] -0.81 0.4197
## Random effects model 0.5000 [0.0929; 2.6925] -0.81 0.4197
##
## Quantifying heterogeneity:
## tau^2 = NA; tau = NA; I^2 = NA; H = NA
##
## Details on meta-analytical method:
## - Mantel-Haenszel method
## - Inverse variance method
## - Restricted maximum-likelihood estimator for tau^2
```

### 10.23.2 Forest plot

```
forest(clav_iii_v_metabin,
       sortvar = TE)
```

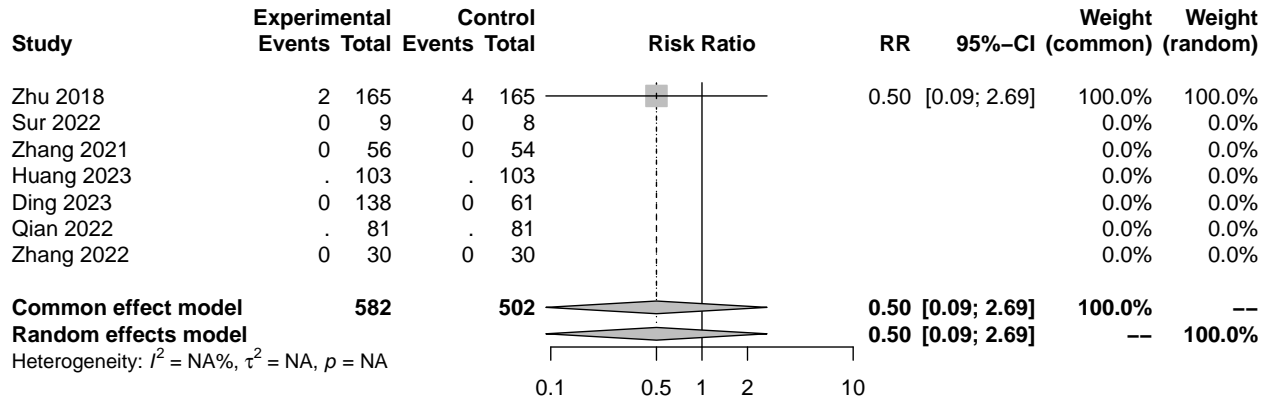

### 10.23.3 Trim and Fill

```
#trimfill(clav_iii_v_metabin)  
#forest(trimfill(clav_iii_v_metabin),  
#      sortvar = TE)
```

### 10.23.4 Funnel plot

```
funnel((clav_iii_v_metabin))
```

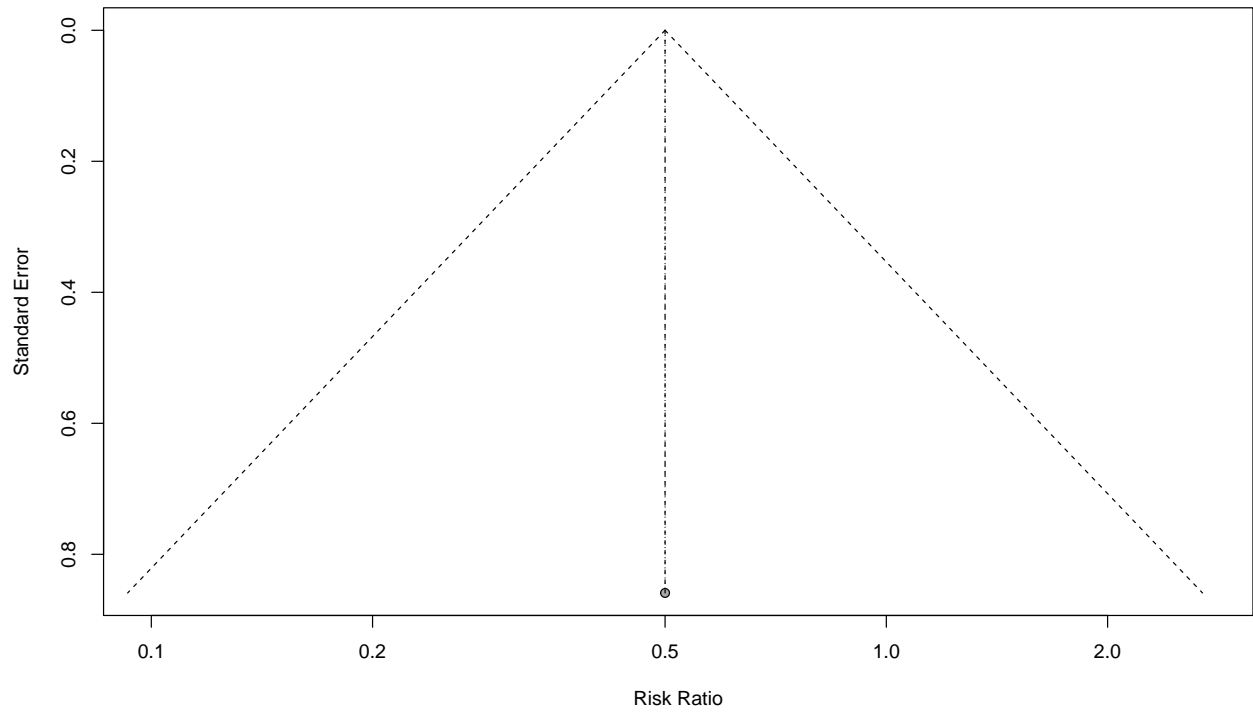

### 10.23.5 Baujat

```
baujat(clav_iii_v_metabin, pos = 1)
```



### 10.23.6 Leave one out

```
metainf(clav_iii_v_metabin)
```

```
## Influential analysis (common effect model)
##
##           RR           95%-CI p-value tau^2 tau I^2
## Omitting Sur 2022    0.5000 [0.0929; 2.6925] 0.4197
## Omitting Zhu 2018
## Omitting Zhang 2021 0.5000 [0.0929; 2.6925] 0.4197
## Omitting Huang 2023 0.5000 [0.0929; 2.6925] 0.4197
## Omitting Ding 2023  0.5000 [0.0929; 2.6925] 0.4197
## Omitting Qian 2022  0.5000 [0.0929; 2.6925] 0.4197
## Omitting Zhang 2022 0.5000 [0.0929; 2.6925] 0.4197
##
## Pooled estimate      0.5000 [0.0929; 2.6925] 0.4197
##
## Details on meta-analytical method:
## - Mantel-Haenszel method
## - Restricted maximum-likelihood estimator for tau^2
```



```

    sfr_metabin$k,
    aux_rx_metabin$k,
    comp_metabin$k,
    fever_metabin$k,
    infection_metabin$k,
    sepsis_metabin$k,
    abscess_metabin$k,
    haematoma_metabin$k,
    pain_metabin$k,
    stricture_metabin$k,
    ir_embolisation_metabin$k,
    transfusion_metabin$k,
    clav_i_metabin$k,
    clav_ii_metabin$k,
    clav_iii_metabin$k,
    clav_iv_metabin$k,
    clav_i_ii_metabin$k,
    clav_iii_v_metabin$k,
    or_time_metacont$k,
    vas_metacont$k,
    los_metacont$k),
"es" = c(
    immediate_sfr_metabin$TE.random %>% exp(),
    sfr_metabin$TE.random %>% exp(),
    aux_rx_metabin$TE.random %>% exp(),
    comp_metabin$TE.random %>% exp(),
    fever_metabin$TE.random %>% exp(),
    infection_metabin$TE.random %>% exp(),
    sepsis_metabin$TE.random %>% exp(),
    abscess_metabin$TE.random %>% exp(),
    haematoma_metabin$TE.random %>% exp(),
    pain_metabin$TE.random %>% exp(),
    stricture_metabin$TE.random %>% exp(),
    ir_embolisation_metabin$TE.random %>% exp(),
    transfusion_metabin$TE.random %>% exp(),
    clav_i_metabin$TE.random %>% exp(),
    clav_ii_metabin$TE.random %>% exp(),
    clav_iii_metabin$TE.random %>% exp(),
    clav_iv_metabin$TE.random %>% exp(),
    clav_i_ii_metabin$TE.random %>% exp(),
    clav_iii_v_metabin$TE.random %>% exp(),
    or_time_metacont$TE.random,
    vas_metacont$TE.random,
    los_metacont$TE.random),
"lower_ci" = c(
    immediate_sfr_metabin$lower.random %>% exp(),
    sfr_metabin$lower.random %>% exp(),
    aux_rx_metabin$lower.random %>% exp(),
    comp_metabin$lower.random %>% exp(),
    fever_metabin$lower.random %>% exp(),
    infection_metabin$lower.random %>% exp(),
    sepsis_metabin$lower.random %>% exp(),
    abscess_metabin$lower.random %>% exp(),

```



```

haematoma_metabin$lower.random %>% exp(),
pain_metabin$lower.random %>% exp(),
stricture_metabin$lower.random %>% exp(),
ir_embolisation_metabin$lower.random %>% exp(),
transfusion_metabin$lower.random %>% exp(),
clav_i_metabin$lower.random %>% exp(),
clav_ii_metabin$lower.random %>% exp(),
clav_iii_metabin$lower.random %>% exp(),
clav_iv_metabin$lower.random %>% exp(),
clav_i_ii_metabin$lower.random %>% exp(),
clav_iii_v_metabin$lower.random %>% exp(),
or_time_metacont$lower.random,
vas_metacont$lower.random,
los_metacont$lower.random),
"upper_ci" = c(immediate_sfr_metabin$upper.random %>% exp(),
               sfr_metabin$upper.random %>% exp(),
               aux_rx_metabin$upper.random %>% exp(),
               comp_metabin$upper.random %>% exp(),
               fever_metabin$upper.random %>% exp(),
               infection_metabin$upper.random %>% exp(),
               sepsis_metabin$upper.random %>% exp(),
               abscess_metabin$upper.random %>% exp(),
               haematoma_metabin$upper.random %>% exp(),
               pain_metabin$upper.random %>% exp(),
               stricture_metabin$upper.random %>% exp(),
               ir_embolisation_metabin$upper.random %>% exp(),
               transfusion_metabin$upper.random %>% exp(),
               clav_i_metabin$upper.random %>% exp(),
               clav_ii_metabin$upper.random %>% exp(),
               clav_iii_metabin$upper.random %>% exp(),
               clav_iv_metabin$upper.random %>% exp(),
               clav_i_ii_metabin$upper.random %>% exp(),
               clav_iii_v_metabin$upper.random %>% exp(),
               or_time_metacont$upper.random,
               vas_metacont$upper.random,
               los_metacont$upper.random),
"p" = c(
  immediate_sfr_metabin$pval.random,
  sfr_metabin$pval.random,
  aux_rx_metabin$pval.random,
  comp_metabin$pval.random,
  fever_metabin$pval.random,
  infection_metabin$pval.random,
  sepsis_metabin$pval.random,
  abscess_metabin$pval.random,
  haematoma_metabin$pval.random,
  pain_metabin$pval.random,
  stricture_metabin$pval.random,
  ir_embolisation_metabin$pval.random,
  transfusion_metabin$pval.random,
  clav_i_metabin$pval.random,
  clav_ii_metabin$pval.random,
  clav_iii_metabin$pval.random,

```

```

clav_iv_metabin$pval.random,
clav_i_ii_metabin$pval.random,
clav_iii_v_metabin$pval.random,
or_time_metacont$pval.random,
vas_metacont$pval.random,
los_metacont$pval.random)) %>% as_tibble() %>% drop_na(es)

overall$es <- as.numeric(overall$es)
overall$es <- round(overall$es, digits = 2)

overall$lower_ci <- as.numeric(overall$lower_ci)
overall$lower_ci <- round(overall$lower_ci, digits = 2)

overall$upper_ci <- as.numeric(overall$upper_ci)
overall$upper_ci <- round(overall$upper_ci, digits = 2)

overall$p <- as.numeric(overall$p)
overall$p <- round(overall$p, digits = 2)
overall$p <- ifelse(overall$p<0.001, "<0.001", overall$p)

```

## 11.1 Summary Table of number of studies for each outcome included in meta-analysis

```
overall %>% subset(select = c(Outcome, n_studies)) %>% gt() %>% tab_header(title = "Summary table of Nu
```

Summary table of Number of Studies for Each Outcome Meta-Analysis

| Outcome               | Studies, n |
|-----------------------|------------|
| Immediate SFR         | 9          |
| Final SFR             | 7          |
| Auxiliary Treatment   | 1          |
| Overall Complications | 7          |
| Fever                 | 6          |
| Infection             | 7          |
| Sepsis                | 1          |
| Stricture             | 1          |
| CD I                  | 3          |
| CD II                 | 2          |
| CD III                | 1          |
| CD IV                 | 1          |
| CD I-II               | 3          |
| CD III-V              | 1          |
| Operative time        | 6          |
| VAS                   | 1          |
| Length of Stay        | 2          |

## 11.2 Summary Forest plot of Continuous outcomes

### 11.2.1 Continuous Outcomes Table

md = mean difference lb = lower bound of 95% confidence interval ub = upper bound of 95% confidence interval tf = trim and fill

```
overall_continuous <-  
  overall %>% subset(type == "cont") %>% subset(select = c(Outcome,  
                                                         n_studies,  
                                                         es,  
                                                         lower_ci,  
                                                         upper_ci,  
                                                         p)) %>% as_tibble()  
overall_continuous %>% gt() %>% tab_header(title = "Summary Table for Continuous Outcomes") %>% cols_me
```

Summary Table for Continuous Outcomes

| Outcome        | Studies, n | MD (95% CI)        | p    |
|----------------|------------|--------------------|------|
| Operative time | 6          | -4.31 (-8.61-0.00) | 0.05 |
| VAS            | 1          | -0.34 (-0.65-0.03) | 0.03 |
| Length of Stay | 2          | -0.50 (-1.17-0.18) | 0.15 |

### 11.2.2 Continuous Forest plot

```

continuous_plot <- overall_continuous %>%
  forestplot(
    mean = es,
    lower = lower_ci,
    upper = upper_ci,
    labeltext = c(Outcome, n_studies, es, lower_ci, upper_ci, p),
    zero = 0,
    vertices = TRUE,
    title = "A. Forest plot of MA Outcomes for Continuous Outcomes",
    clip = c(-4, 2),
    xlab = "MD [95% CI]",
    graph.pos = 3
  ) %>% fp_set_style(
    box = c("black"),
    line = "black",
    txt_gp = fpTxtGp(
      ticks = gpar(fontfamily = "", cex = 1),
      xlab = gpar(fontfamily = "", cex = 1)
    )
  ) %>% fp_add_lines("steelblue") %>%
  fp_add_header("Outcome",
    "Studies, n",
    "MD",
    "[ 95%", " CI ]",
    "P-Value") %>% fp_decorate_graph(box = TRUE) %>% fp_set_zebra_style("#EFEFEF")
continuous_plot

```

**A. Forest plot of MA Outcomes for Continuous Outcomes**

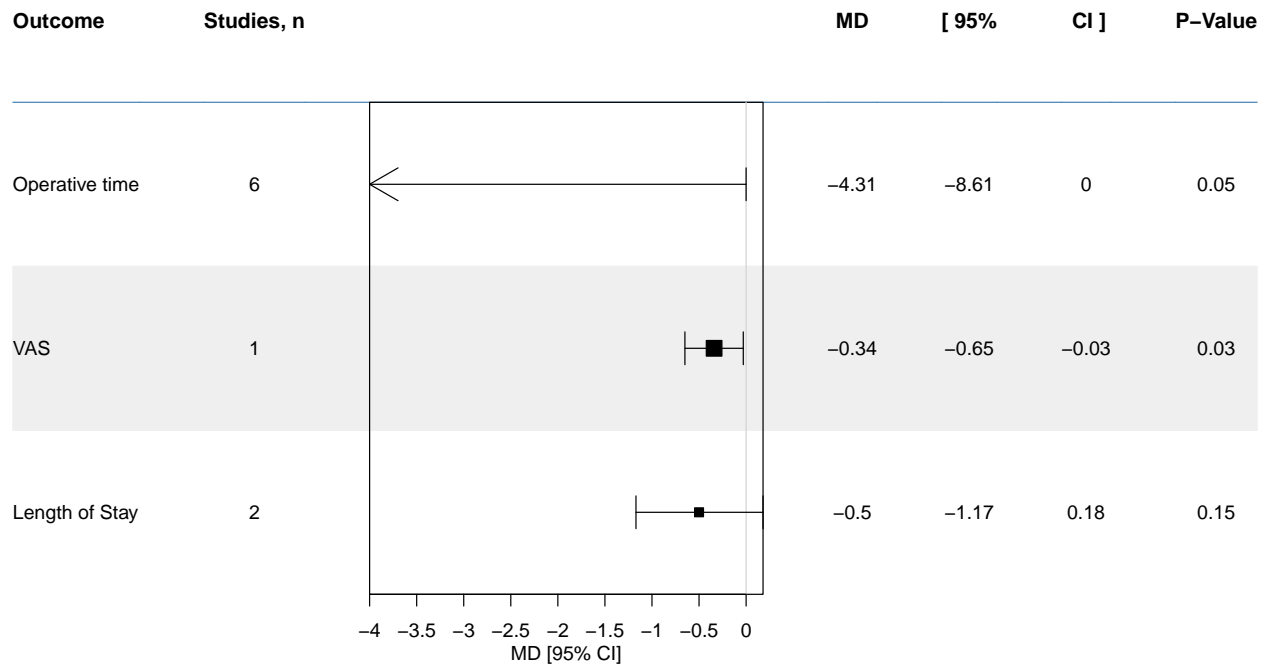

### 11.3 Summary Forest plot of Binary outcomes

### 11.3.1 Binary Outcomes Table

md = mean difference lb = lower bound of 95% confidence interval ub = upper bound of 95% confidence interval tf = trim and fill

```
overall_binary <-  
  overall %>% subset(type == "binary") %>% subset(select = c(Outcome,  
                                                            n_studies,  
                                                            es,  
                                                            lower_ci,  
                                                            upper_ci,  
                                                            p)) %>% as_tibble()  
overall_binary %>% gt() %>% tab_header(title = "Summary Table for Binary Outcomes") %>% cols_merge(colum
```

Summary Table for Binary Outcomes

| Outcome               | Studies, n | RR (95% CI)       | p      |
|-----------------------|------------|-------------------|--------|
| Immediate SFR         | 9          | 1.15 (0.99-1.34)  | 0.08   |
| Final SFR             | 7          | 1.20 (1.10-1.30)  | <0.001 |
| Auxiliary Treatment   | 1          | 0.33 (0.01-8.12)  | 0.5    |
| Overall Complications | 7          | 0.44 (0.29-0.67)  | <0.001 |
| Fever                 | 6          | 0.38 (0.23-0.65)  | <0.001 |
| Infection             | 7          | 0.38 (0.23-0.64)  | <0.001 |
| Sepsis                | 1          | 0.27 (0.08-0.96)  | 0.04   |
| Stricture             | 1          | 3.00 (0.12-73.11) | 0.5    |
| CD I                  | 3          | 0.58 (0.33-1.02)  | 0.06   |
| CD II                 | 2          | 0.28 (0.09-0.88)  | 0.03   |
| CD III                | 1          | 1.00 (0.06-15.85) | 1      |
| CD IV                 | 1          | 0.33 (0.04-3.17)  | 0.34   |
| CD I-II               | 3          | 0.48 (0.29-0.80)  | <0.001 |
| CD III-V              | 1          | 0.50 (0.09-2.69)  | 0.42   |

### 11.3.2 Binary Forest plot - Meta-Analysis

Reference = No Suction

```
binary_plot <- overall_binary %>%
  forestplot(
    mean = es,
    lower = lower_ci,
    upper = upper_ci,
    labeltext = c(Outcome, n_studies, es, lower_ci, upper_ci, p),
    zero = 1,
    vertices = TRUE,
    title = "A. Forest plot of MA Outcomes for Binary Outcomes",
    clip = c(-1.5, 1.5),
    xlab = "RR [95% CI]",
    graph.pos = 3
  ) %>% fp_set_style(
    box = c("black"),
    line = "black",
    txt_gp = fpTxtGp(
      ticks = gpar(fontfamily = "", cex = 1),
      xlab = gpar(fontfamily = "", cex = 1)
    )
  ) %>% fp_add_lines("steelblue") %>%
  fp_add_header("Outcome",
    "Studies, n",
    "RR",
    "[ 95%", " CI ]",
    "P-Value") %>% fp_decorate_graph(box = TRUE) %>% fp_set_zebra_style("#EFEFEF")
binary_plot
```

A. Forest plot of MA Outcomes for Binary Outcomes

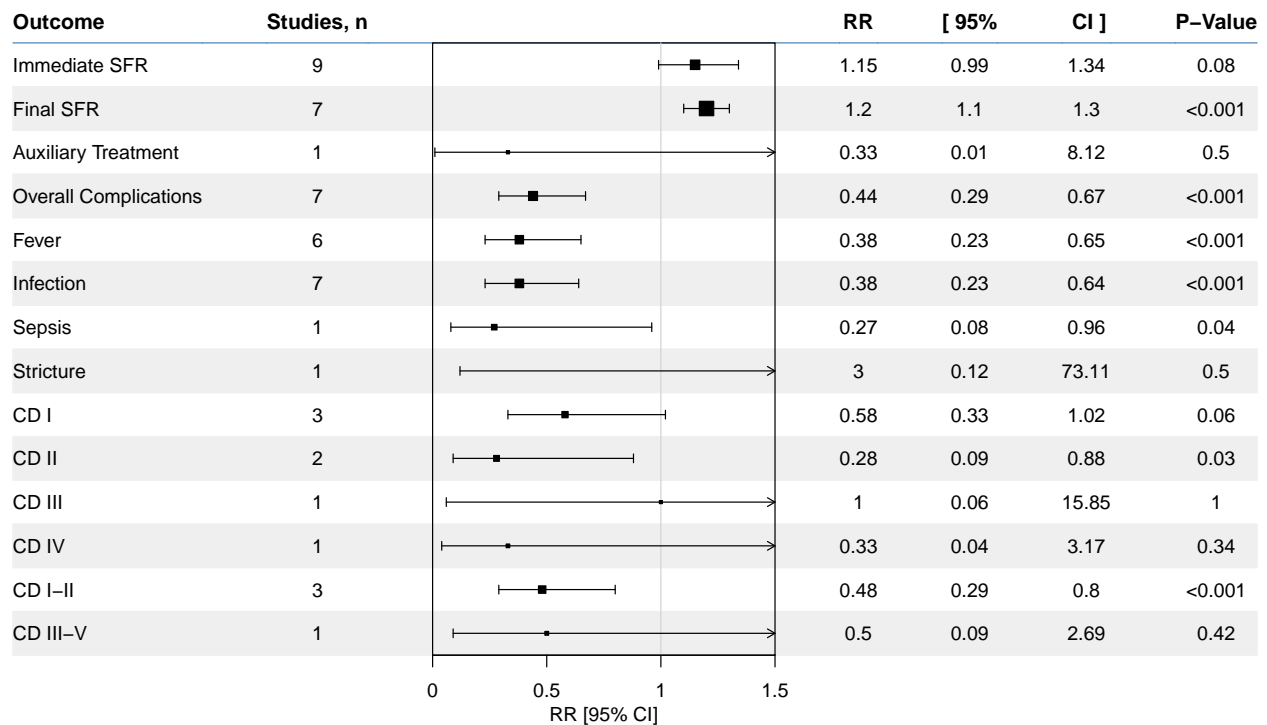



## 12 Mini-PCNL vs Flexi URS with Suction Meta-Analysis Outcomes

```
minipcnl_only <- suction_data %>% subset(control_group == "mini-PCNL ")
```

## 12.1 Immediate SFR

### 12.1.1 Meta-analysis

```
immediate_sfr_metabin <- metabin(data = suction_data,
                                event.c = sfr_immediate_n_control,
                                n.c = sample_size_control,
                                event.e = sfr_immediate_n_suction,
                                n.e = sample_size_suction,
                                studlab = author_year)

immediate_sfr_metabin

## Number of studies: k = 9
## Number of observations: o = 2311
## Number of events: e = 979
##
##              RR          95%-CI    z  p-value
## Common effect model  1.1581 [1.0834; 1.2380] 4.31 < 0.0001
## Random effects model  1.1478 [0.9854; 1.3370] 1.77  0.0765
##
## Quantifying heterogeneity:
## tau^2 = 0.0365 [0.0088; 0.2318]; tau = 0.1910 [0.0939; 0.4814]
## I^2 = 74.6% [50.9%; 86.9%]; H = 1.99 [1.43; 2.76]
##
## Test of heterogeneity:
##      Q d.f. p-value
## 31.55  8 0.0001
##
## Details on meta-analytical method:
## - Mantel-Haenszel method
## - Inverse variance method
## - Restricted maximum-likelihood estimator for tau^2
## - Q-Profile method for confidence interval of tau^2 and tau
```

### 12.1.2 Forest plot

```
forest(immediate_sfr_metabin,
      sortvar = TE)
```

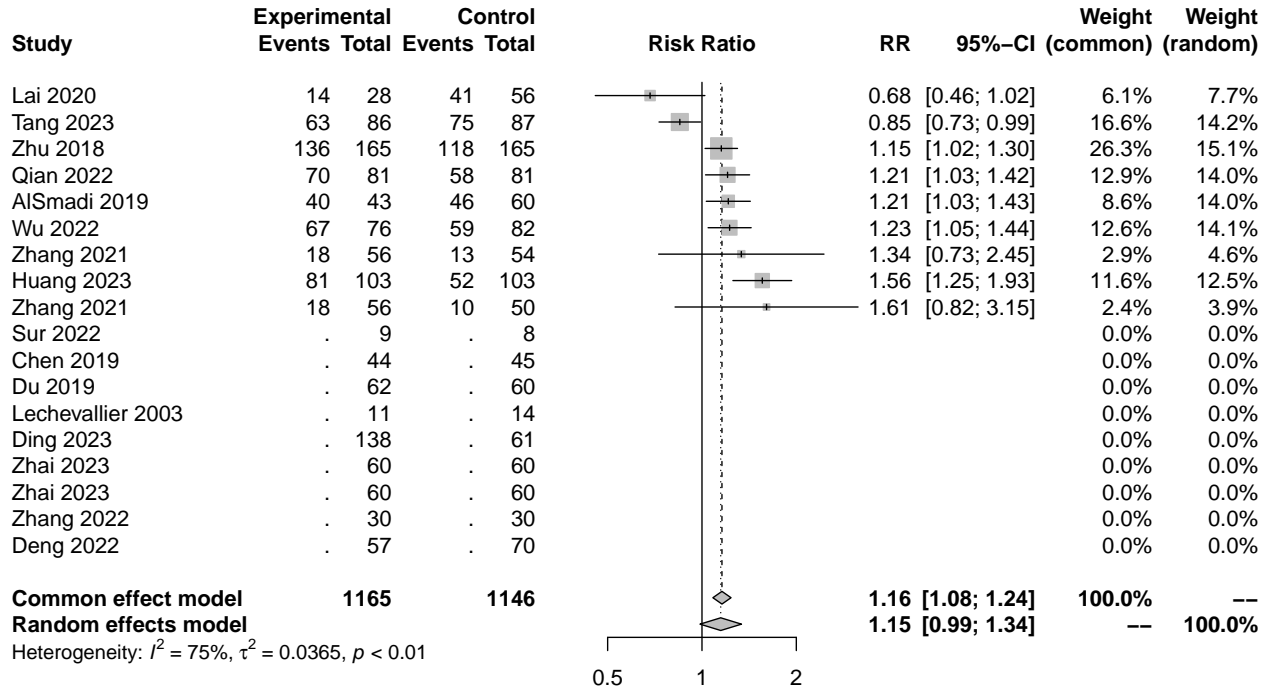

### 12.1.3 Trim and Fill

```
trimfill(immediate_sfr_metabin)
```

```
## Warning in trimfill.meta(immediate_sfr_metabin): 9 observation(s) dropped due
## to missing values

## Number of studies: k = 11 (with 2 added studies)
## Number of observations: o = 1744
## Number of events: e = 1140
##
##                RR          95%-CI    z p-value
## Random effects model 1.0855 [0.9289; 1.2685] 1.03 0.3019
##
## Quantifying heterogeneity:
## tau^2 = 0.0471 [0.0138; 0.2196]; tau = 0.2170 [0.1173; 0.4686]
## I^2 = 76.9% [58.8%; 87.1%]; H = 2.08 [1.56; 2.78]
##
## Test of heterogeneity:
##      Q d.f.  p-value
## 43.33  10 < 0.0001
##
## Details on meta-analytical method:
## - Inverse variance method
## - Restricted maximum-likelihood estimator for tau^2
## - Q-Profile method for confidence interval of tau^2 and tau
## - Trim-and-fill method to adjust for funnel plot asymmetry (L-estimator)
```

```
forest(trimfill(immediate_sfr_metabin),
        sortvar = TE)
```

```
## Warning in trimfill.meta(immediate_sfr_metabin): 9 observation(s) dropped due
## to missing values
```



Heterogeneity:  $I^2 = 77\%$ ,  $\tau^2 = 0.0471$ ,  $p < 0.01$

### 12.1.4 Funnel plot

```
funnel(trimfill(immediate_sfr_metabin))
```

```
## Warning in trimfill.meta(immediate_sfr_metabin): 9 observation(s) dropped due  
## to missing values
```





### 12.1.6 Leave one out

```
metainf(immediate_sfr_metabin)
```

```
## Influential analysis (common effect model)
##
##
##          RR          95%-CI  p-value  tau^2    tau
## Omitting Sur 2022      1.1581 [1.0834; 1.2380] < 0.0001 0.0365 0.1910
## Omitting Tang 2023     1.2195 [1.1329; 1.3128] < 0.0001 0.0076 0.0873
## Omitting Chen 2019     1.1581 [1.0834; 1.2380] < 0.0001 0.0365 0.1910
## Omitting Du 2019      1.1581 [1.0834; 1.2380] < 0.0001 0.0365 0.1910
## Omitting Lai 2020     1.1889 [1.1116; 1.2716] < 0.0001 0.0258 0.1607
## Omitting Zhu 2018     1.1601 [1.0710; 1.2565] 0.0003 0.0482 0.2196
## Omitting Zhang 2021   1.1473 [1.0741; 1.2254] < 0.0001 0.0376 0.1938
## Omitting Zhang 2021   1.1527 [1.0791; 1.2313] < 0.0001 0.0396 0.1990
## Omitting Lechevallier 2003 1.1581 [1.0834; 1.2380] < 0.0001 0.0365 0.1910
## Omitting Huang 2023   1.1057 [1.0315; 1.1853] 0.0046 0.0246 0.1568
## Omitting Wu 2022     1.1484 [1.0676; 1.2353] 0.0002 0.0464 0.2153
## Omitting Ding 2023   1.1581 [1.0834; 1.2380] < 0.0001 0.0365 0.1910
## Omitting Zhai 2023   1.1581 [1.0834; 1.2380] < 0.0001 0.0365 0.1910
## Omitting Zhai 2023   1.1581 [1.0834; 1.2380] < 0.0001 0.0365 0.1910
## Omitting Qian 2022   1.1508 [1.0700; 1.2377] 0.0002 0.0468 0.2164
## Omitting Zhang 2022   1.1581 [1.0834; 1.2380] < 0.0001 0.0365 0.1910
## Omitting Deng 2022   1.1581 [1.0834; 1.2380] < 0.0001 0.0365 0.1910
## Omitting AlSmadi 2019 1.1529 [1.0734; 1.2383] < 0.0001 0.0467 0.2160
##
## Pooled estimate      1.1581 [1.0834; 1.2380] < 0.0001 0.0365 0.1910
##
##          I^2
## Omitting Sur 2022      74.6%
## Omitting Tang 2023     51.5%
## Omitting Chen 2019     74.6%
## Omitting Du 2019      74.6%
## Omitting Lai 2020     72.2%
## Omitting Zhu 2018     77.8%
## Omitting Zhang 2021   77.1%
## Omitting Zhang 2021   77.6%
## Omitting Lechevallier 2003 74.6%
## Omitting Huang 2023   69.4%
## Omitting Wu 2022     77.2%
## Omitting Ding 2023   74.6%
## Omitting Zhai 2023   74.6%
## Omitting Zhai 2023   74.6%
## Omitting Qian 2022   77.4%
## Omitting Zhang 2022   74.6%
## Omitting Deng 2022   74.6%
## Omitting AlSmadi 2019 77.4%
##
## Pooled estimate      74.6%
##
## Details on meta-analytical method:
## - Mantel-Haenszel method
## - Restricted maximum-likelihood estimator for tau^2
```

## 12.2 Final SFR

### 12.2.1 Meta-analysis

```
sfr_metabin <- metabin(data = minipcnl_only,
                      event.c = sfr_final_n_control,
                      n.c = sample_size_control,
                      event.e = sfr_final_n_suction,
                      n.e = sample_size_suction,
                      studlab = author_year)

sfr_metabin

## Number of studies: k = 4
## Number of observations: o = 473
## Number of events: e = 443
##
##              RR          95%-CI      z p-value
## Common effect model 0.9669 [0.9210; 1.0151] -1.36 0.1754
## Random effects model 0.9694 [0.9243; 1.0166] -1.28 0.2003
##
## Quantifying heterogeneity:
## tau^2 = 0 [0.0000; 0.0023]; tau = 0 [0.0000; 0.0482]
## I^2 = 0.0% [0.0%; 84.7%]; H = 1.00 [1.00; 2.56]
##
## Test of heterogeneity:
##      Q d.f. p-value
## 0.50   3 0.9182
##
## Details on meta-analytical method:
## - Mantel-Haenszel method
## - Inverse variance method
## - Restricted maximum-likelihood estimator for tau^2
## - Q-Profile method for confidence interval of tau^2 and tau
```



### 12.2.2 Forest plot

```
forest(sfr_metabin,
       sortvar = TE)
```

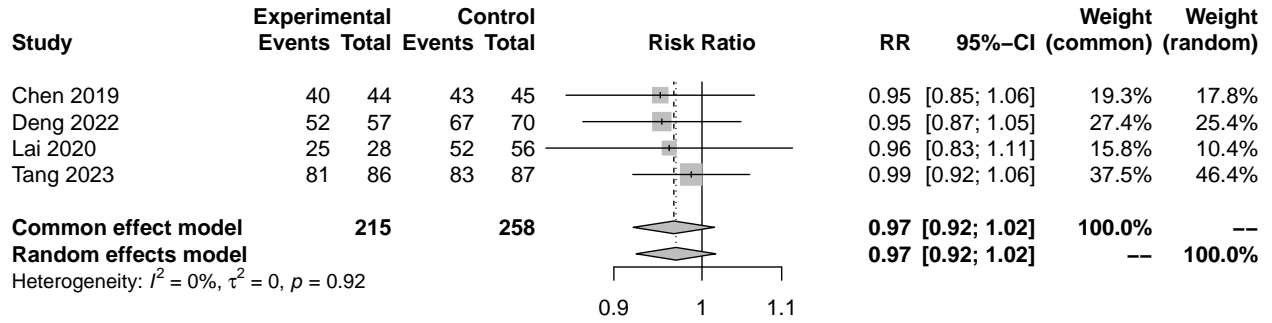

### 12.2.3 Trim and Fill

```
trimfill(sfr_metabin)
```

```
## Number of studies: k = 6 (with 2 added studies)
## Number of observations: o = 689
## Number of events: e = 645
##
##
##          RR          95%-CI      z p-value
## Random effects model 0.9825 [0.9442; 1.0224] -0.87 0.3839
##
## Quantifying heterogeneity:
## tau^2 = 0 [0.0000; 0.0023]; tau = 0 [0.0000; 0.0476]
## I^2 = 0.0% [0.0%; 74.6%]; H = 1.00 [1.00; 1.99]
##
## Test of heterogeneity:
##   Q d.f. p-value
## 1.52   5 0.9110
##
## Details on meta-analytical method:
## - Inverse variance method
## - Restricted maximum-likelihood estimator for tau^2
## - Q-Profile method for confidence interval of tau^2 and tau
## - Trim-and-fill method to adjust for funnel plot asymmetry (L-estimator)
forest(trimfill(sfr_metabin),
       sortvar = TE)
```

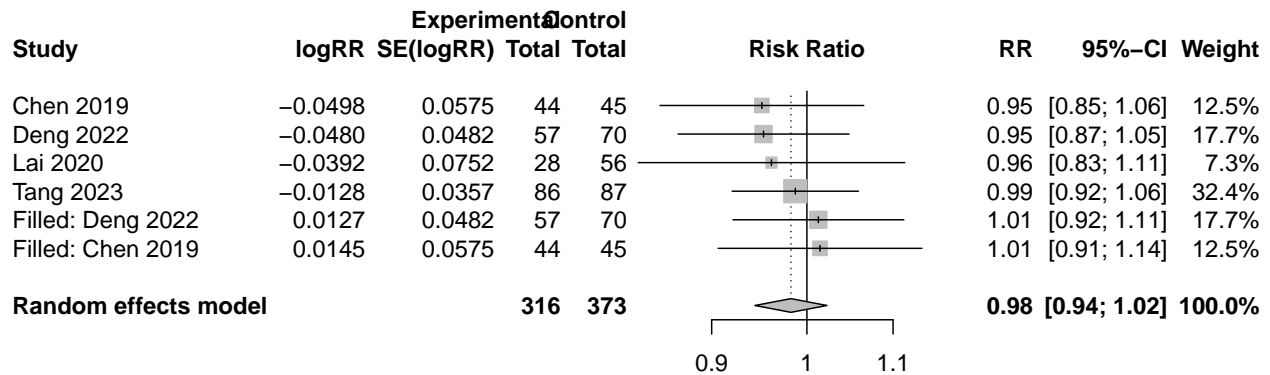

### 12.2.4 Funnel plot

```
funnel(trimfill(sfr_metabin))
```

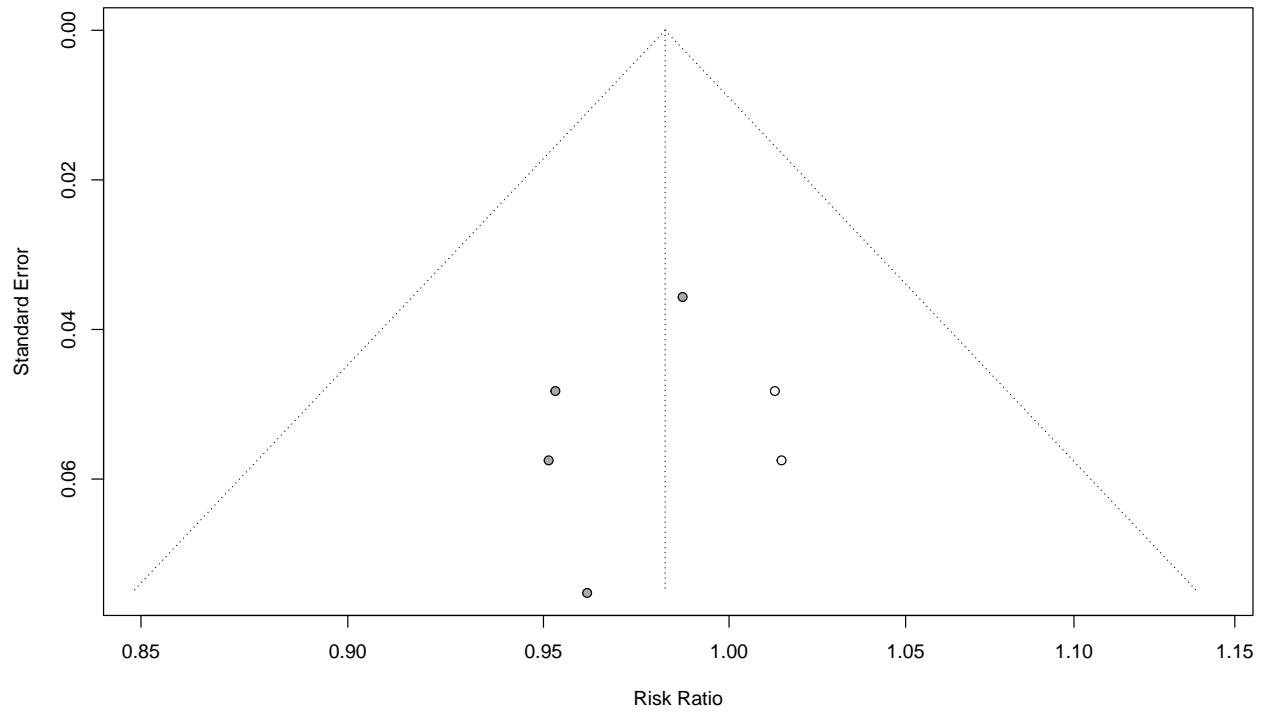

### 12.2.5 Baujat

```
baujat(sfr_metabin, pos = 1)
```

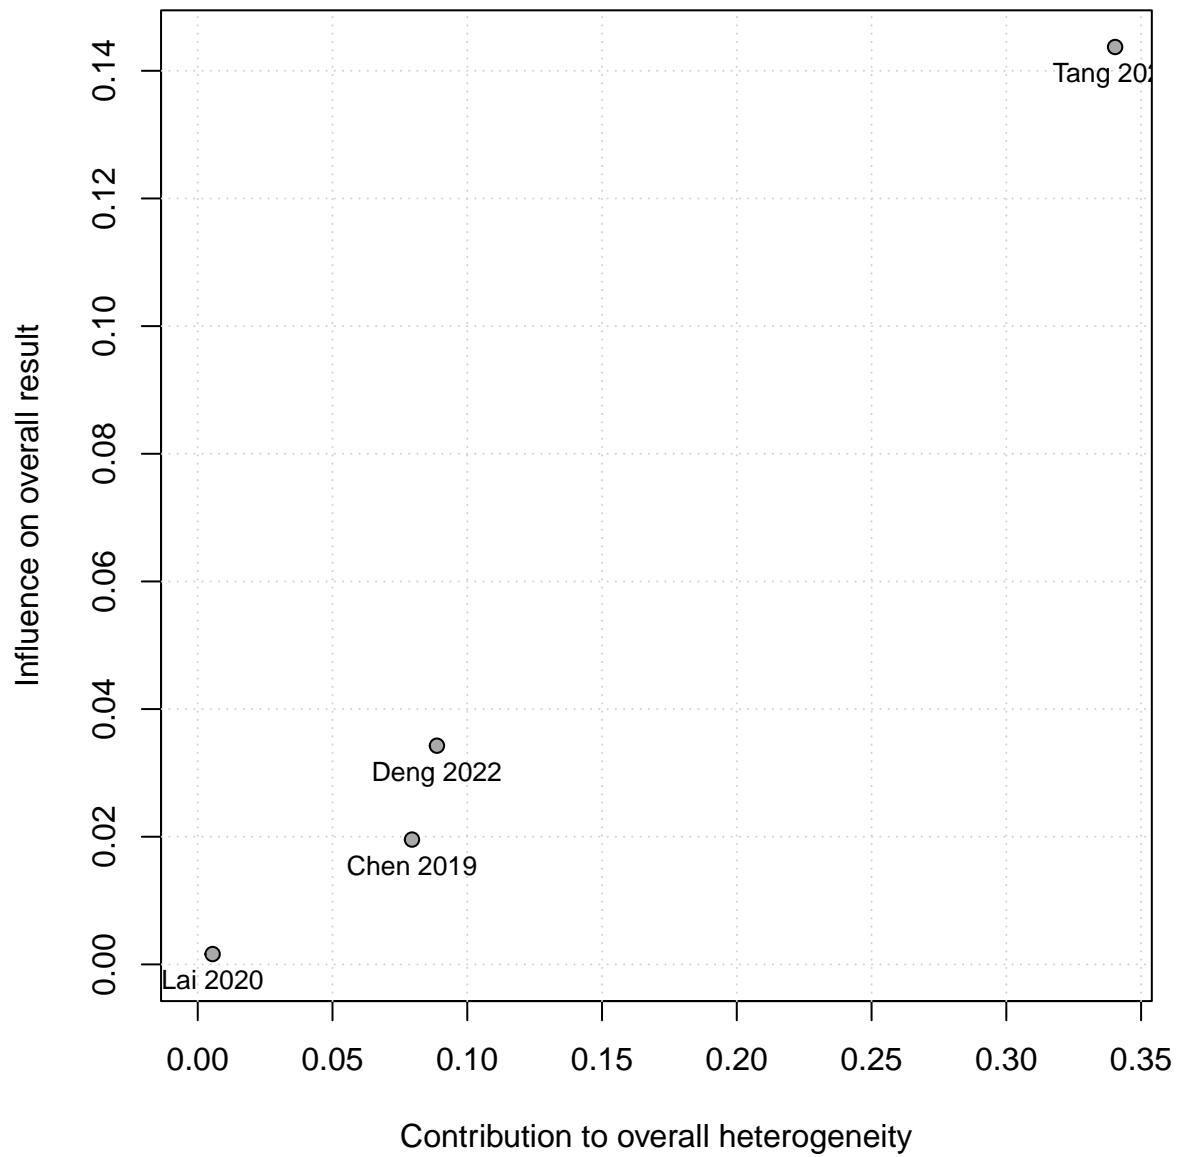

## 12.2.6 Leave one out

```
metainf(sfr_metabin)
```

```
## Influential analysis (common effect model)
##
##           RR           95%-CI p-value  tau^2    tau    I^2
## Omitting Tang 2023  0.9547 [0.8940; 1.0196]  0.1669  0.0000  0.0000  0.0%
## Omitting Chen 2019  0.9707 [0.9197; 1.0244]  0.2790  0.0000  0.0000  0.0%
## Omitting Lai 2020   0.9679 [0.9200; 1.0183]  0.2081  0.0000  0.0000  0.0%
## Omitting Deng 2022  0.9721 [0.9185; 1.0289]  0.3286  0.0000  0.0000  0.0%
##
## Pooled estimate    0.9669 [0.9210; 1.0151]  0.1754  0.0000  0.0000  0.0%
##
## Details on meta-analytical method:
## - Mantel-Haenszel method
## - Restricted maximum-likelihood estimator for tau^2
```

## 12.3 OR time

### 12.3.1 Meta-analysis

```
or_time_metacont <- metacont(data = minipcni_only,
                             mean.c = or_time_min_mean_control,
                             sd.c = or_time_min_sd_control,
                             mean.e = or_time_min_mean_suction,
                             sd.e = or_time_min_sd_suction,
                             n.e = sample_size_suction,
                             n.c = sample_size_control,
                             studlab = author_year)
or_time_metacont

## Number of studies: k = 4
## Number of observations: o = 473
##
##              MD              95%-CI      z p-value
## Common effect model  2.1825 [0.6472;  3.7178] 2.79 0.0053
## Random effects model  8.1512 [0.0481; 16.2544] 1.97 0.0487
##
## Quantifying heterogeneity:
## tau^2 = 52.8557 [9.6858; >528.5572]; tau = 7.2702 [3.1122; >22.9904]
## I^2 = 87.6% [70.5%; 94.8%]; H = 2.84 [1.84; 4.38]
##
## Test of heterogeneity:
##      Q d.f.  p-value
## 24.16   3 < 0.0001
##
## Details on meta-analytical method:
## - Inverse variance method
## - Restricted maximum-likelihood estimator for tau^2
## - Q-Profile method for confidence interval of tau^2 and tau
```

### 12.3.2 Forest plot

```
forest(or_time_metacont,
       sortvar = TE)
```

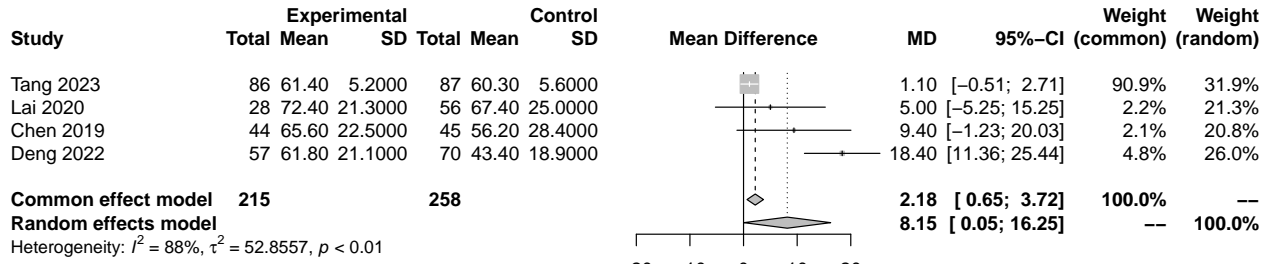

### 12.3.3 Trim and Fill

```
trimfill(or_time_metacont)
```

```
## Number of studies: k = 6 (with 2 added studies)
## Number of observations: o = 689
##
##              MD              95%-CI      z p-value
## Random effects model 1.7739 [-8.1053; 11.6530] 0.35 0.7249
##
## Quantifying heterogeneity:
## tau^2 = 134.4351 [42.0770; 872.9574]; tau = 11.5946 [6.4867; 29.5459]
## I^2 = 90.2% [81.4%; 94.8%]; H = 3.19 [2.32; 4.40]
##
## Test of heterogeneity:
##      Q d.f.  p-value
## 50.97    5 < 0.0001
##
## Details on meta-analytical method:
## - Inverse variance method
## - Restricted maximum-likelihood estimator for tau^2
## - Q-Profile method for confidence interval of tau^2 and tau
## - Trim-and-fill method to adjust for funnel plot asymmetry (L-estimator)
forest(trimfill(or_time_metacont),
        sortvar = TE)
```

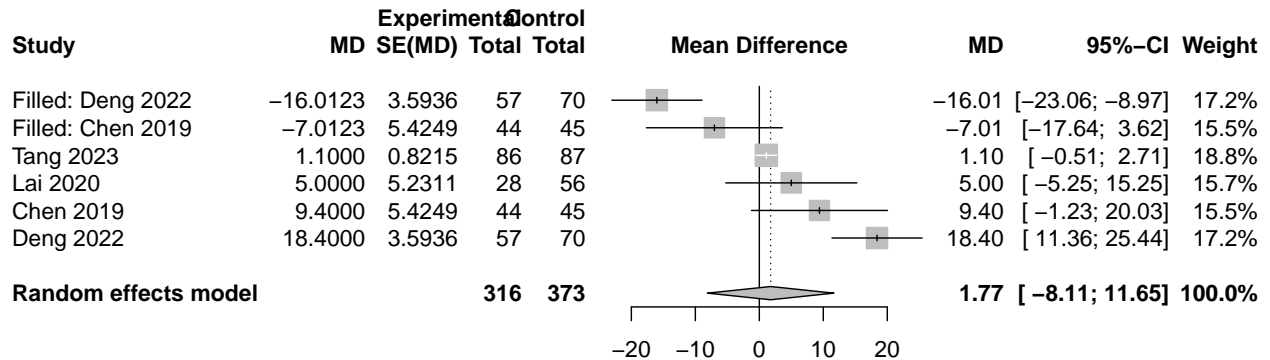



### 12.3.4 Funnel plot

```
funnel(trimfill(or_time_metacont))
```

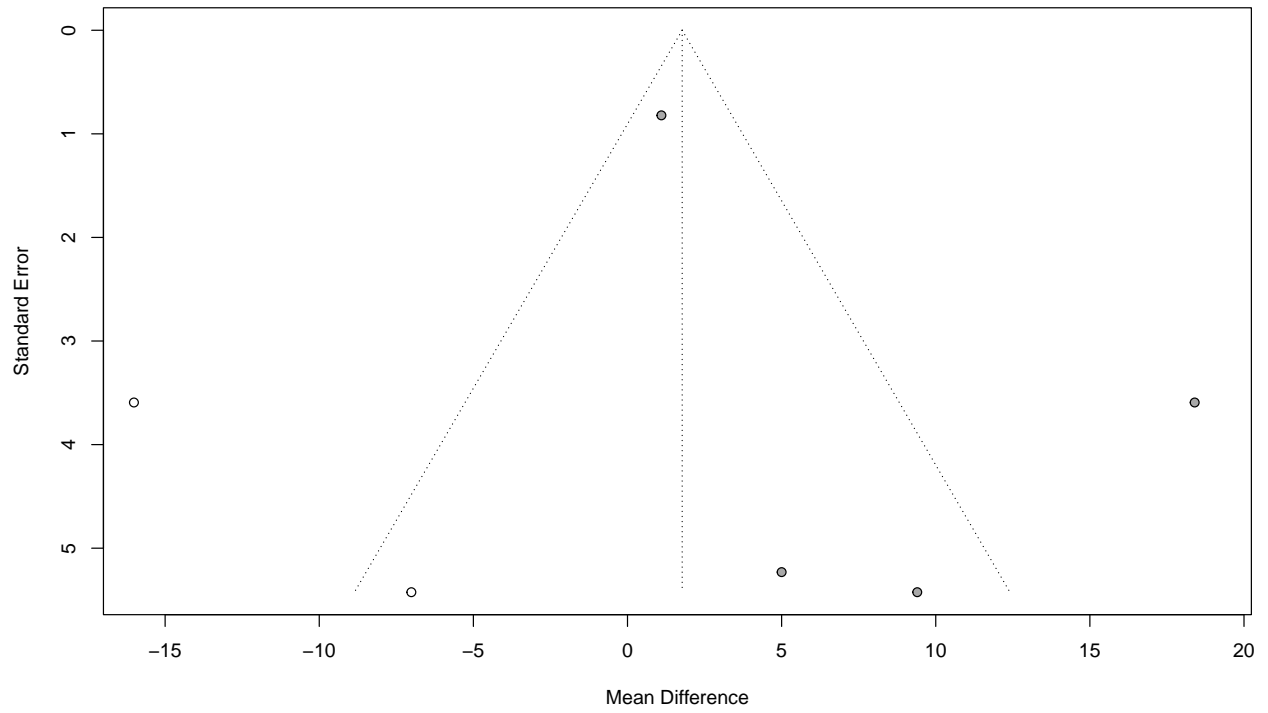

### 12.3.5 Baujat

```
baujat(or_time_metacont, pos = 1)
```

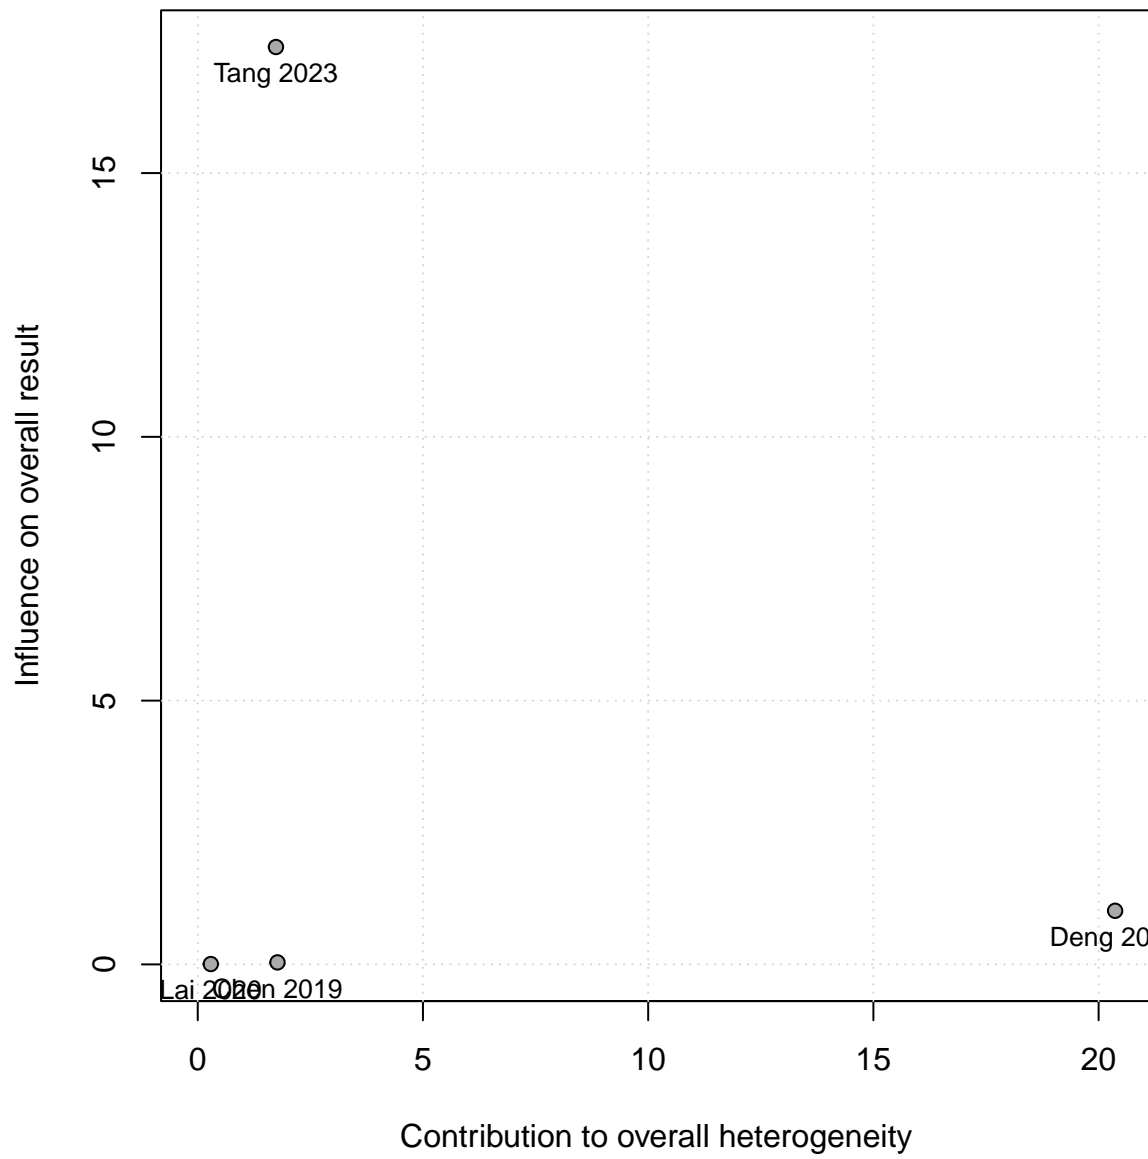

### 12.3.6 Leave one out

```
metainf(or_time_metacont)
```

```
## Influential analysis (common effect model)
##
##           MD           95%-CI  p-value   tau^2    tau
## Omitting Tang 2023  13.0235 [ 7.9282; 18.1189] < 0.0001  31.8643  5.6448
## Omitting Chen 2019   2.0288 [ 0.4773;  3.5804]  0.0104  76.4762  8.7451
## Omitting Lai 2020    2.1179 [ 0.5651;  3.6707]  0.0075  74.4036  8.6258
## Omitting Deng 2022   1.3735 [-0.1996;  2.9466]  0.0870   7.8020  2.7932
##
## Pooled estimate      2.1825 [ 0.6472;  3.7178]  0.0053  52.8557  7.2702
##
##           I^2
## Omitting Tang 2023   60.3%
## Omitting Chen 2019   91.1%
## Omitting Lai 2020    91.6%
## Omitting Deng 2022   28.1%
##
## Pooled estimate      87.6%
##
## Details on meta-analytical method:
## - Inverse variance method
## - Restricted maximum-likelihood estimator for tau^2
```

## 12.4 Auxiliary Treatments

### 12.4.1 Meta-analysis

```
aux_rx_metabin <- metabin(data = minipcn1_only,
                          event.c = auxillary_tx_n_control,
                          n.c = sample_size_control,
                          event.e = auxillary_tx_n_suction,
                          n.e = sample_size_suction,
                          studlab = author_year)

aux_rx_metabin

## Number of studies: k = 2
## Number of observations: o = 473
## Number of events: e = 34
##
##              RR          95%-CI    z p-value
## Common effect model 1.7887 [1.0028; 3.1907] 1.97 0.0489
## Random effects model 1.7661 [1.0000; 3.1189] 1.96 0.0500
##
## Quantifying heterogeneity:
## tau^2 = 0; tau = 0; I^2 = 0.0%; H = 1.00
##
## Test of heterogeneity:
##   Q d.f. p-value
## 0.05  1 0.8194
##
## Details on meta-analytical method:
## - Mantel-Haenszel method
## - Inverse variance method
## - Restricted maximum-likelihood estimator for tau^2
```

### 12.4.2 Forest plot

```
forest(aux_rx_metabin,
       sortvar = TE)
```

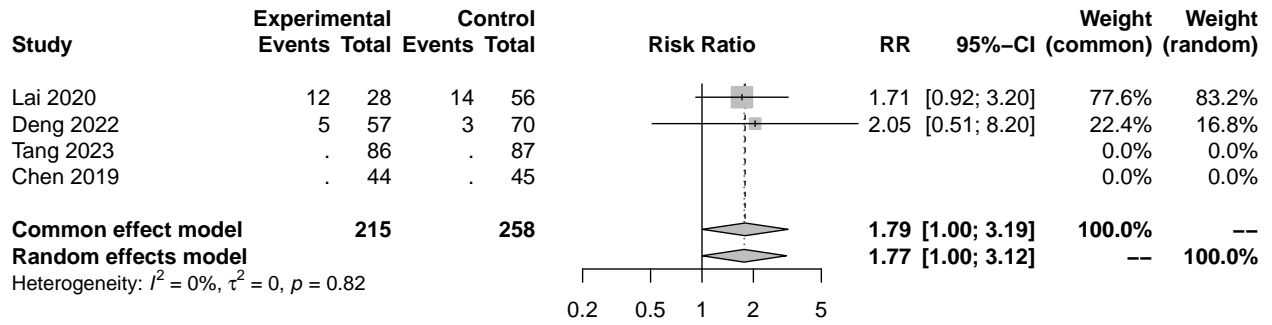

### 12.4.3 Trim and Fill

```
#trimfill(aux_rx_metabin)  
#forest(trimfill(aux_rx_metabin),  
#      sortvar = TE)
```

### 12.4.4 Funnel plot

```
funnel((aux_rx_metabin))
```

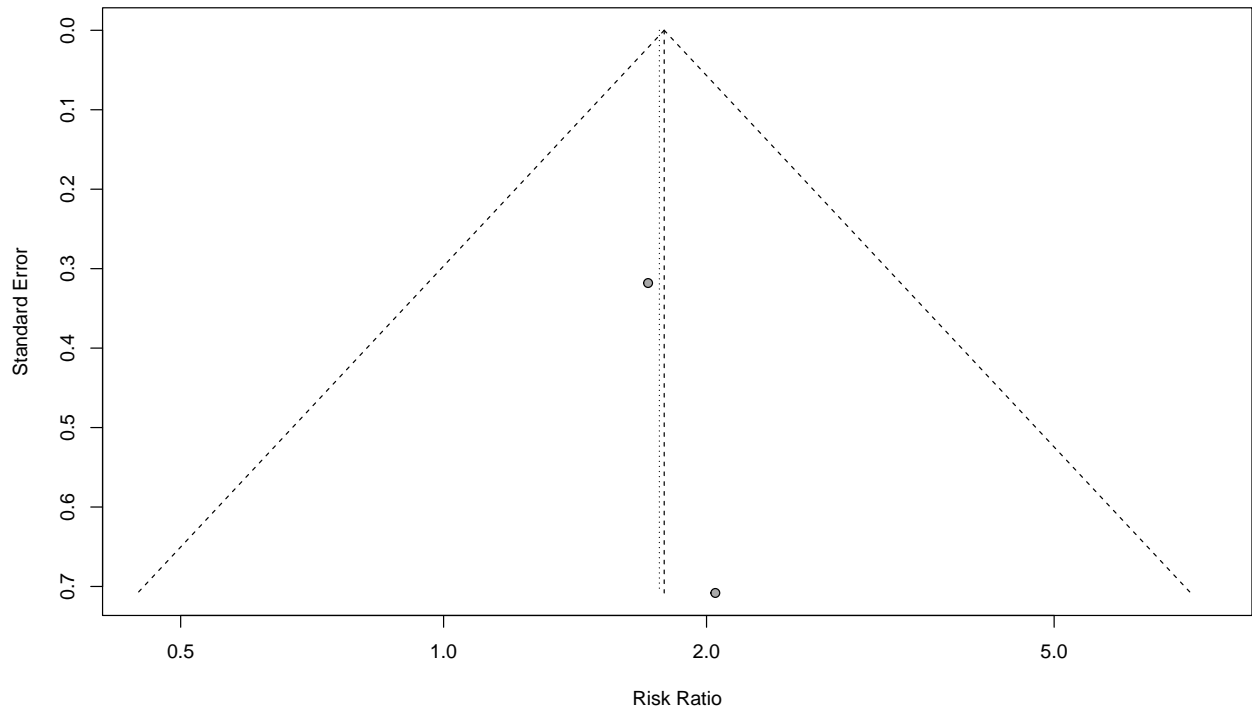

### 12.4.5 Baujat

```
baujat(aux_rx_metabin, pos = 1)
```

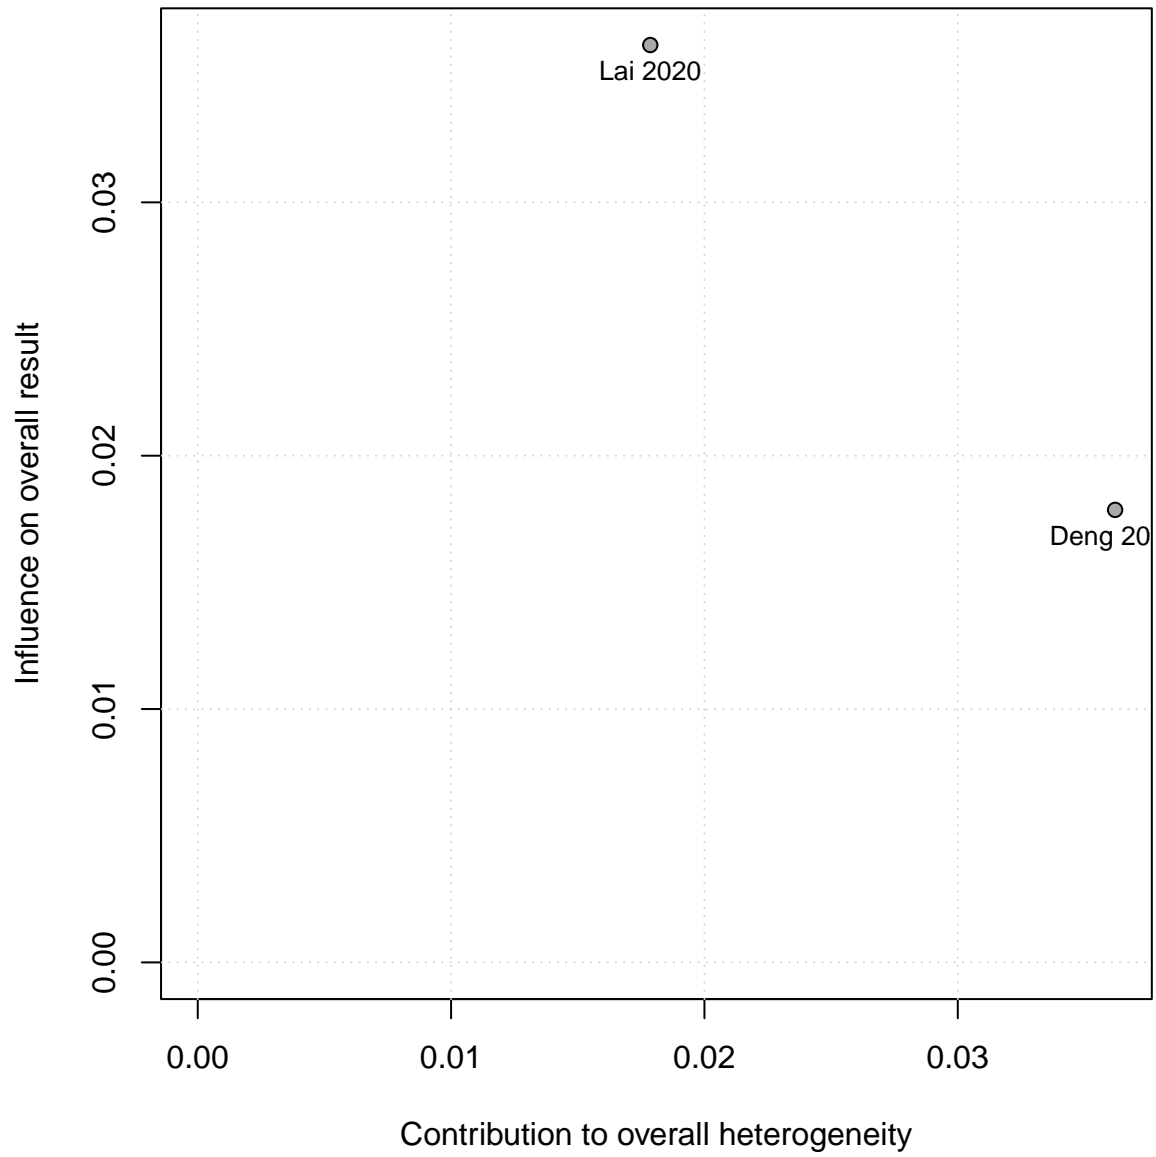



### 12.4.6 Leave one out

```
metainf(aux_rx_metabin)
```

```
## Influential analysis (common effect model)
##
##           RR           95%-CI p-value  tau^2    tau    I^2
## Omitting Tang 2023  1.7887 [1.0028; 3.1907]  0.0489  0.0000  0.0000  0.0%
## Omitting Chen 2019  1.7887 [1.0028; 3.1907]  0.0489  0.0000  0.0000  0.0%
## Omitting Lai 2020   2.0468 [0.5108; 8.2010]  0.3118
## Omitting Deng 2022  1.7143 [0.9190; 3.1978]  0.0902
##
## Pooled estimate    1.7887 [1.0028; 3.1907]  0.0489  0.0000  0.0000  0.0%
##
## Details on meta-analytical method:
## - Mantel-Haenszel method
## - Restricted maximum-likelihood estimator for tau^2
```

## 12.5 VAS

### 12.5.1 Meta-analysis

```
vas_metacont <- metacont(data = minipcnl_only,
                        mean.c = vas_score_mean_control,
                        sd.c = vas_score_sd_control,
                        mean.e = vas_score_mean_suction,
                        sd.e = vas_score_sd_suction,
                        n.e = sample_size_suction,
                        n.c = sample_size_control,
                        studlab = author_year)

vas_metacont

## Number of studies: k = 1
## Number of observations: o = 473
##
##              MD              95%-CI      z  p-value
## Common effect model -2.1000 [-2.6611; -1.5389] -7.34 < 0.0001
## Random effects model -2.1000 [-2.6611; -1.5389] -7.34 < 0.0001
##
## Quantifying heterogeneity:
## tau^2 = NA; tau = NA; I^2 = NA; H = NA
##
## Details on meta-analytical method:
## - Inverse variance method
## - Restricted maximum-likelihood estimator for tau^2
```

### 12.5.2 Forest plot

```
forest(vas_metacont,
       sortvar = TE)
```

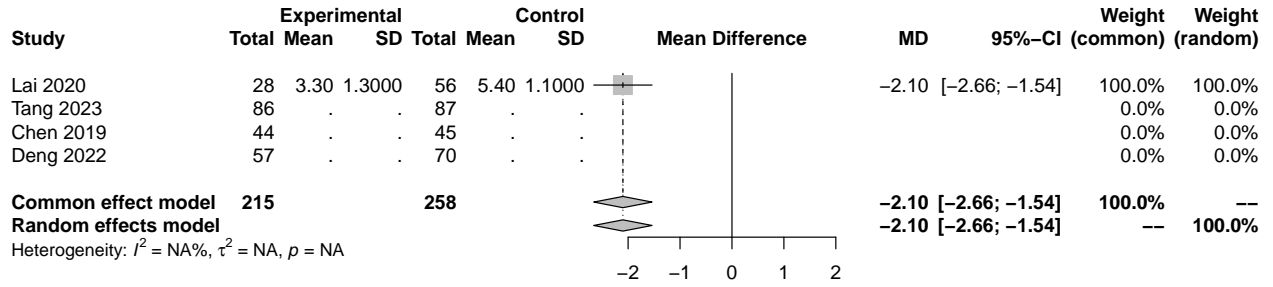

### 12.5.3 Trim and Fill

```
#trimfill(vas_metacont)  
#forest(trimfill(vas_metacont))
```

### 12.5.4 Funnel plot

```
funnel((vas_metacont))
```

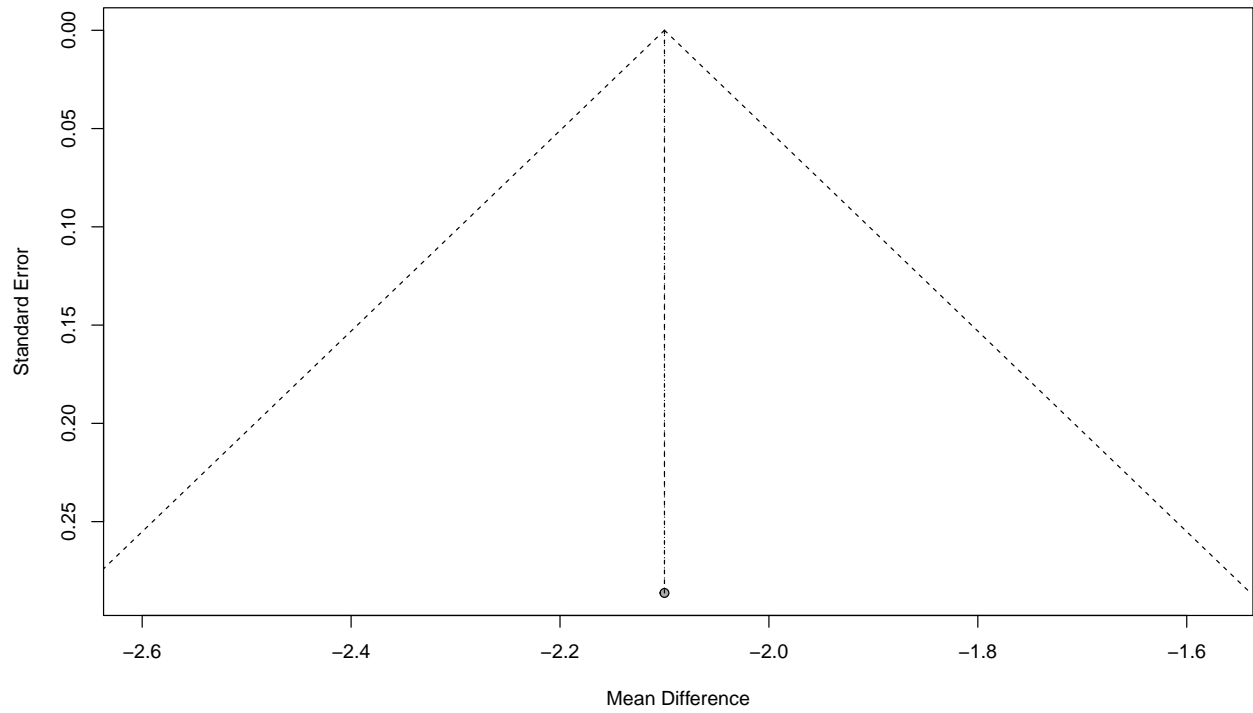

### 12.5.5 Baujat

```
baujat(vas_metacont, pos = 1)
```



### 12.5.6 Leave one out

```
metainf(vas_metacont)
```

```
## Influential analysis (common effect model)
##
##           MD           95%-CI p-value tau^2 tau I^2
## Omitting Tang 2023 -2.1000 [-2.6611; -1.5389] < 0.0001
## Omitting Chen 2019 -2.1000 [-2.6611; -1.5389] < 0.0001
## Omitting Lai 2020
## Omitting Deng 2022 -2.1000 [-2.6611; -1.5389] < 0.0001
##
## Pooled estimate    -2.1000 [-2.6611; -1.5389] < 0.0001
##
## Details on meta-analytical method:
## - Inverse variance method
## - Restricted maximum-likelihood estimator for tau^2
```

## 12.6 LoS

### 12.6.1 Meta-analysis

```
los_metacont <- metacont(data = minipcnl_only,
                        mean.c = los_days_mean_control,
                        sd.c = los_days_sd_control,
                        mean.e = los_days_mean_suction,
                        sd.e = los_days_sd_suction,
                        n.e = sample_size_suction,
                        n.c = sample_size_control,
                        studlab = author_year)

los_metacont

## Number of studies: k = 3
## Number of observations: o = 473
##
##              MD              95%-CI      z  p-value
## Common effect model -2.9428 [-3.4716; -2.4139] -10.91 < 0.0001
## Random effects model -2.8894 [-3.5491; -2.2296]  -8.58 < 0.0001
##
## Quantifying heterogeneity:
## tau^2 = 0.1088 [0.0000; 24.5107]; tau = 0.3299 [0.0000; 4.9508]
## I^2 = 41.9% [0.0%; 82.4%]; H = 1.31 [1.00; 2.38]
##
## Test of heterogeneity:
##      Q d.f. p-value
## 3.44  2  0.1787
##
## Details on meta-analytical method:
## - Inverse variance method
## - Restricted maximum-likelihood estimator for tau^2
## - Q-Profile method for confidence interval of tau^2 and tau
```



### 12.6.2 Forest plot

```
forest(los_metacont,
      sortvar = TE)
```

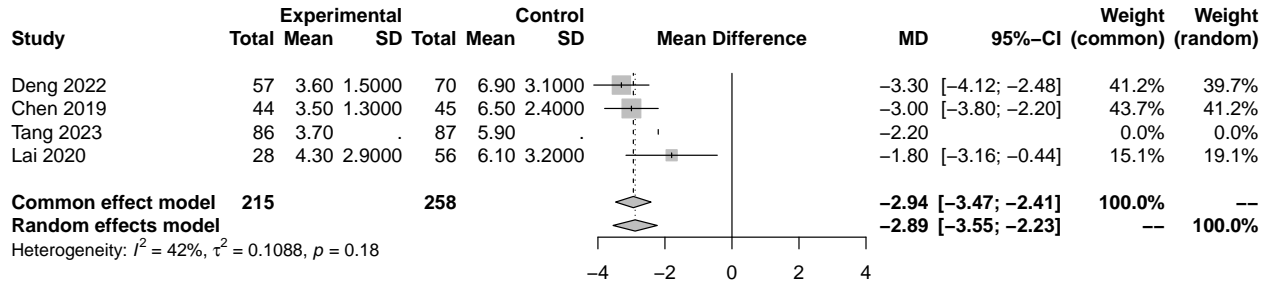

### 12.6.3 Trim and Fill

```
trimfill(los_metacont)
```

```
## Warning in trimfill.meta(los_metacont): 1 observation(s) dropped due to missing
## values
```

```
## Number of studies: k = 3 (with 0 added studies)
```

```
## Number of observations: o = 300
```

```
##
```

```
##           MD           95%-CI      z p-value
```

```
## Random effects model -2.8894 [-3.5491; -2.2296] -8.58 < 0.0001
```

```
##
```

```
## Quantifying heterogeneity:
```

```
## tau^2 = 0.1088 [0.0000; 24.5107]; tau = 0.3299 [0.0000; 4.9508]
```

```
## I^2 = 41.9% [0.0%; 82.4%]; H = 1.31 [1.00; 2.38]
```

```
##
```

```
## Test of heterogeneity:
```

```
##      Q d.f. p-value
```

```
## 3.44   2  0.1787
```

```
##
```

```
## Details on meta-analytical method:
```

```
## - Inverse variance method
```

```
## - Restricted maximum-likelihood estimator for tau^2
```

```
## - Q-Profile method for confidence interval of tau^2 and tau
```

```
## - Trim-and-fill method to adjust for funnel plot asymmetry (L-estimator)
```

```
forest(trimfill(los_metacont),
        sortvar = TE)
```

```
## Warning in trimfill.meta(los_metacont): 1 observation(s) dropped due to missing
## values
```

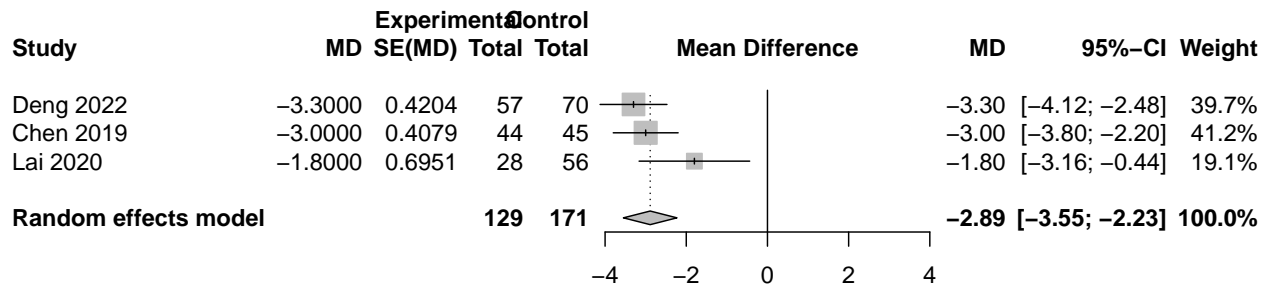

Heterogeneity:  $I^2 = 42\%$ ,  $\tau^2 = 0.1088$ ,  $p = 0.18$

## 12.6.4 Funnel plot

```
funnel(trimfill(los_metacont))
```

```
## Warning in trimfill.meta(los_metacont): 1 observation(s) dropped due to missing  
## values
```

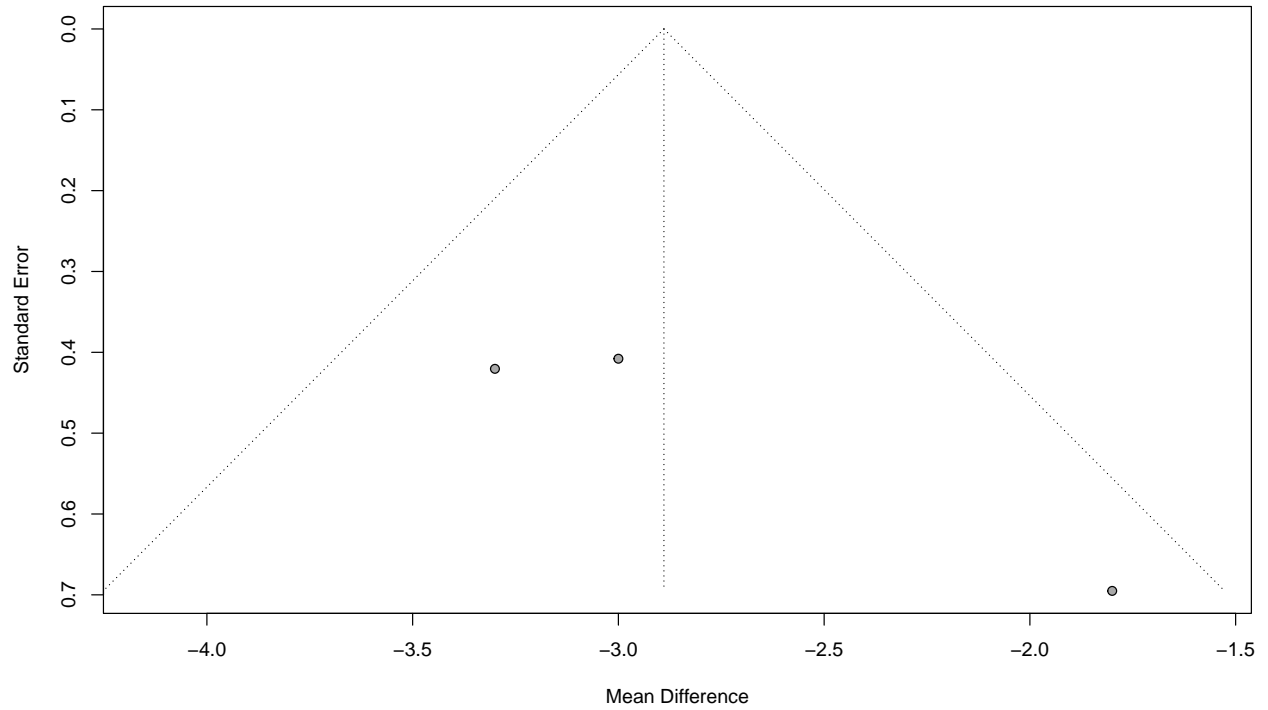

### 12.6.5 Baujat

```
baujat(los_metacont, pos = 1)
```

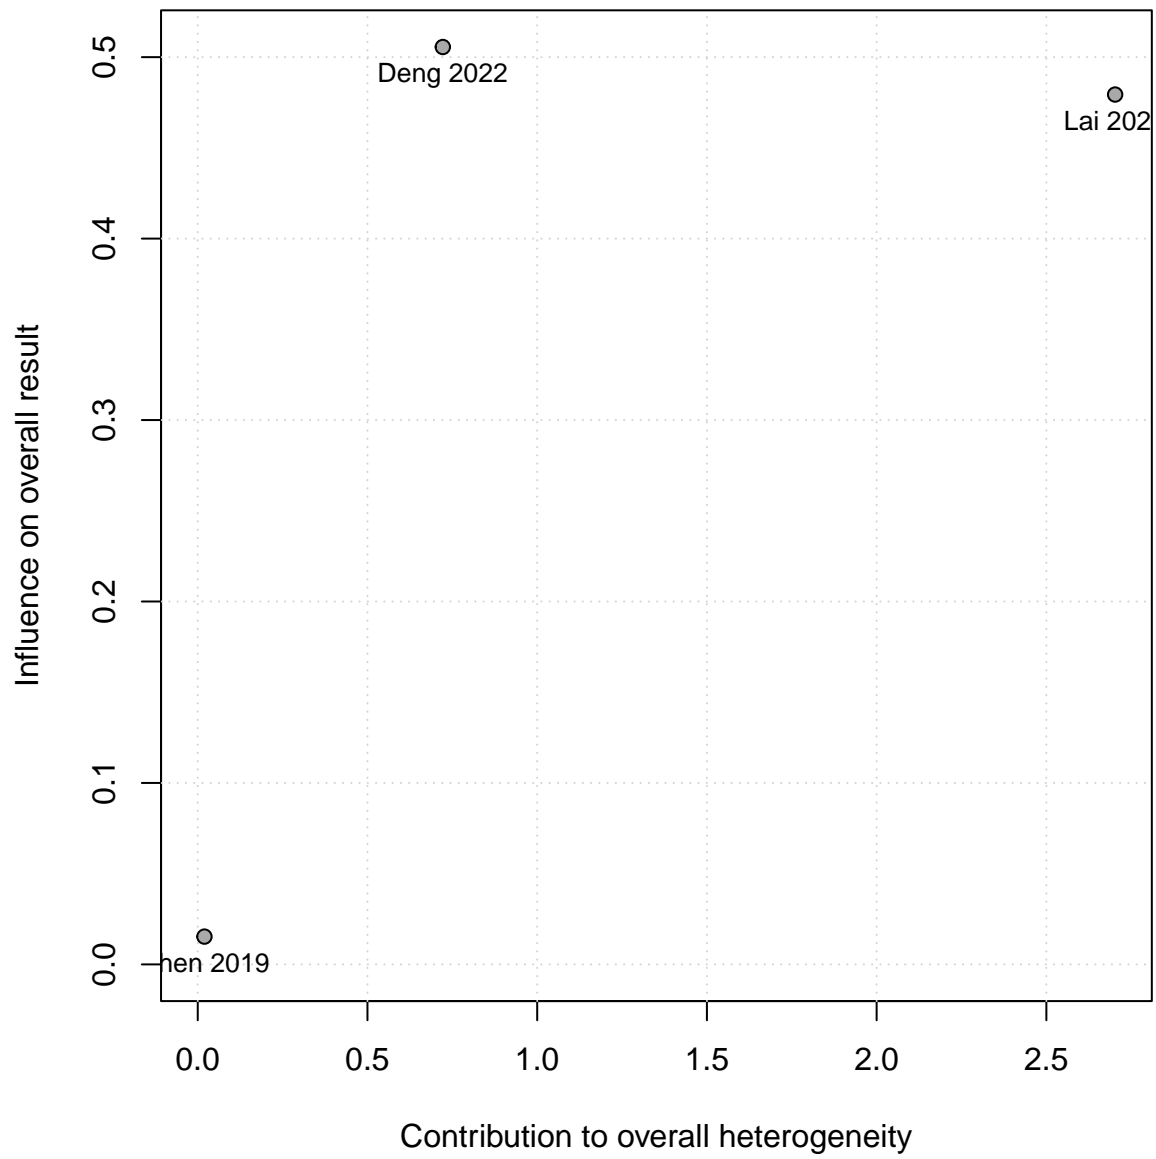

### 12.6.6 Leave one out

```
metainf(los_metacont)
```

```
## Influential analysis (common effect model)
##
##           MD           95%-CI p-value  tau^2   tau   I^2
## Omitting Tang 2023 -2.9428 [-3.4716; -2.4139] < 0.0001 0.1088 0.3299 41.9%
## Omitting Chen 2019 -2.8983 [-3.6034; -2.1932] < 0.0001 0.7950 0.8916 70.7%
## Omitting Lai 2020  -3.1455 [-3.7193; -2.5717] < 0.0001 0.0000 0.0000  0.0%
## Omitting Deng 2022 -2.6926 [-3.3822; -2.0030] < 0.0001 0.3952 0.6286 54.9%
##
## Pooled estimate    -2.9428 [-3.4716; -2.4139] < 0.0001 0.1088 0.3299 41.9%
##
## Details on meta-analytical method:
## - Inverse variance method
## - Restricted maximum-likelihood estimator for tau^2
```

## 12.7 Complications - All

### 12.7.1 Meta-analysis

```
comp_metabin <- metabin(data = minipcnl_only,
                        event.c = complications_postop_overall_n_control,
                        n.c = sample_size_control,
                        event.e = complications_postop_overall_n_suction,
                        n.e = sample_size_suction,
                        studlab = author_year)
```

```
comp_metabin
```

```
## Number of studies: k = 4
## Number of observations: o = 473
## Number of events: e = 97
##
##              RR          95%-CI      z  p-value
## Common effect model  0.3823 [0.2508; 0.5825] -4.47 < 0.0001
## Random effects model 0.4151 [0.2121; 0.8121] -2.57  0.0102
##
## Quantifying heterogeneity:
## tau^2 = 0.2715 [0.0000; 6.4062]; tau = 0.5211 [0.0000; 2.5310]
## I^2 = 57.8% [0.0%; 86.0%]; H = 1.54 [1.00; 2.67]
##
## Test of heterogeneity:
##   Q d.f. p-value
##  7.10  3  0.0687
##
## Details on meta-analytical method:
## - Mantel-Haenszel method
## - Inverse variance method
## - Restricted maximum-likelihood estimator for tau^2
## - Q-Profile method for confidence interval of tau^2 and tau
```

### 12.7.2 Forest plot

```
forest(comp_metabin,
       sortvar = TE)
```

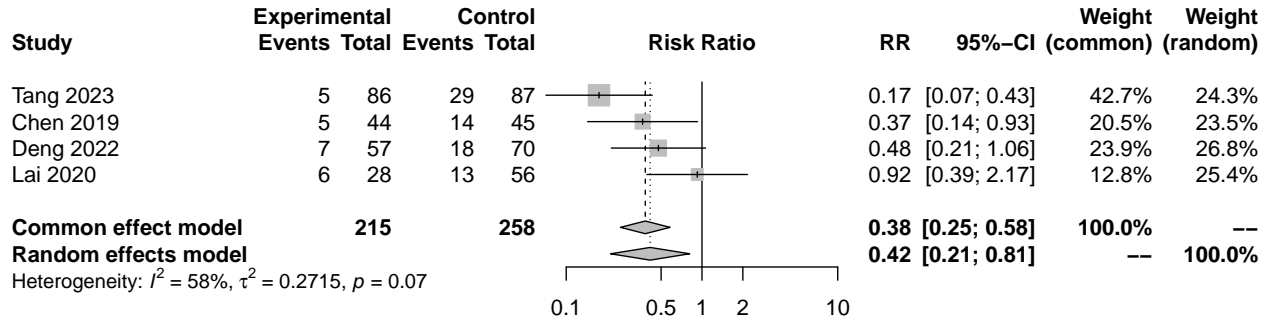

### 12.7.3 Trim and Fill

```
trimfill(comp_metabin)
```

```
## Number of studies: k = 5 (with 1 added studies)
## Number of observations: o = 646
## Number of events: e = 131
##
##              RR          95%-CI      z p-value
## Random effects model 0.5489 [0.2557; 1.1786] -1.54 0.1239
##
## Quantifying heterogeneity:
## tau^2 = 0.5593 [0.0697; 6.2184]; tau = 0.7479 [0.2639; 2.4937]
## I^2 = 73.1% [32.6%; 89.2%]; H = 1.93 [1.22; 3.05]
##
## Test of heterogeneity:
##      Q d.f. p-value
## 14.85  4 0.0050
##
## Details on meta-analytical method:
## - Inverse variance method
## - Restricted maximum-likelihood estimator for tau^2
## - Q-Profile method for confidence interval of tau^2 and tau
## - Trim-and-fill method to adjust for funnel plot asymmetry (L-estimator)
```

```
forest(trimfill(comp_metabin),
       sortvar = TE)
```

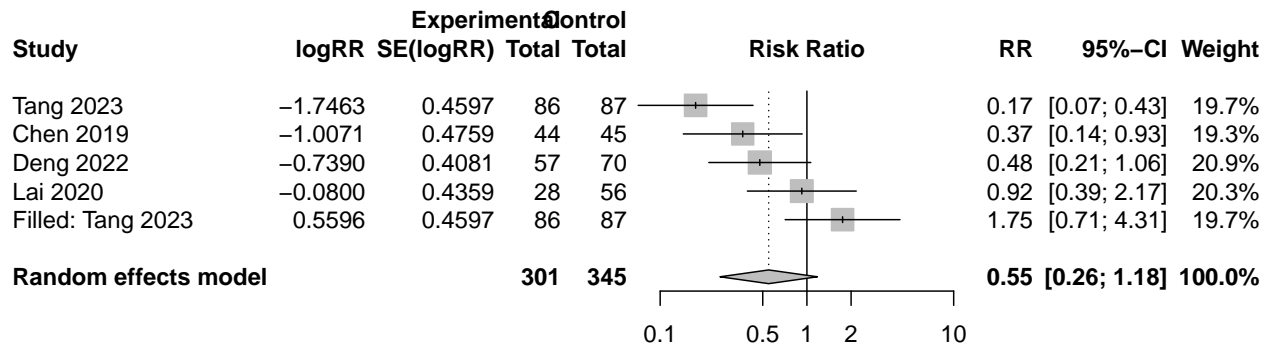



### 12.7.4 Funnel plot

```
funnel(trimfill(comp_metabin))
```

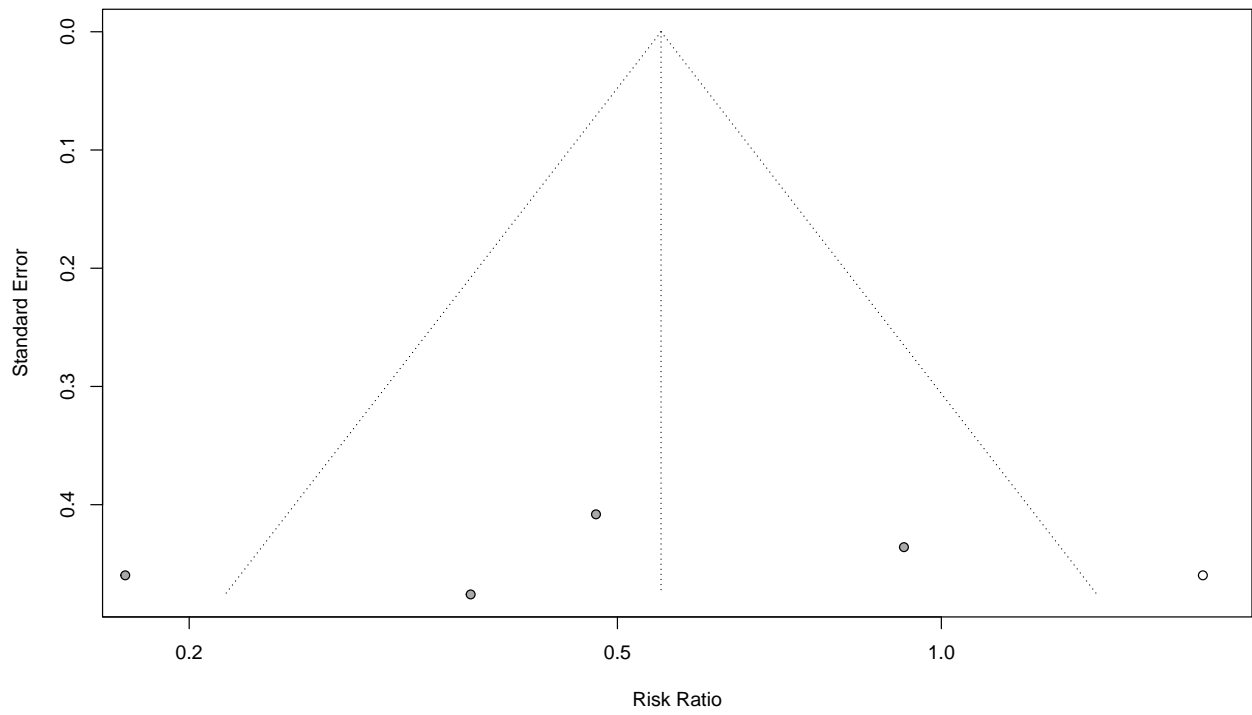

### 12.7.5 Baujat

```
baujat(comp_metabin, pos = 1)
```

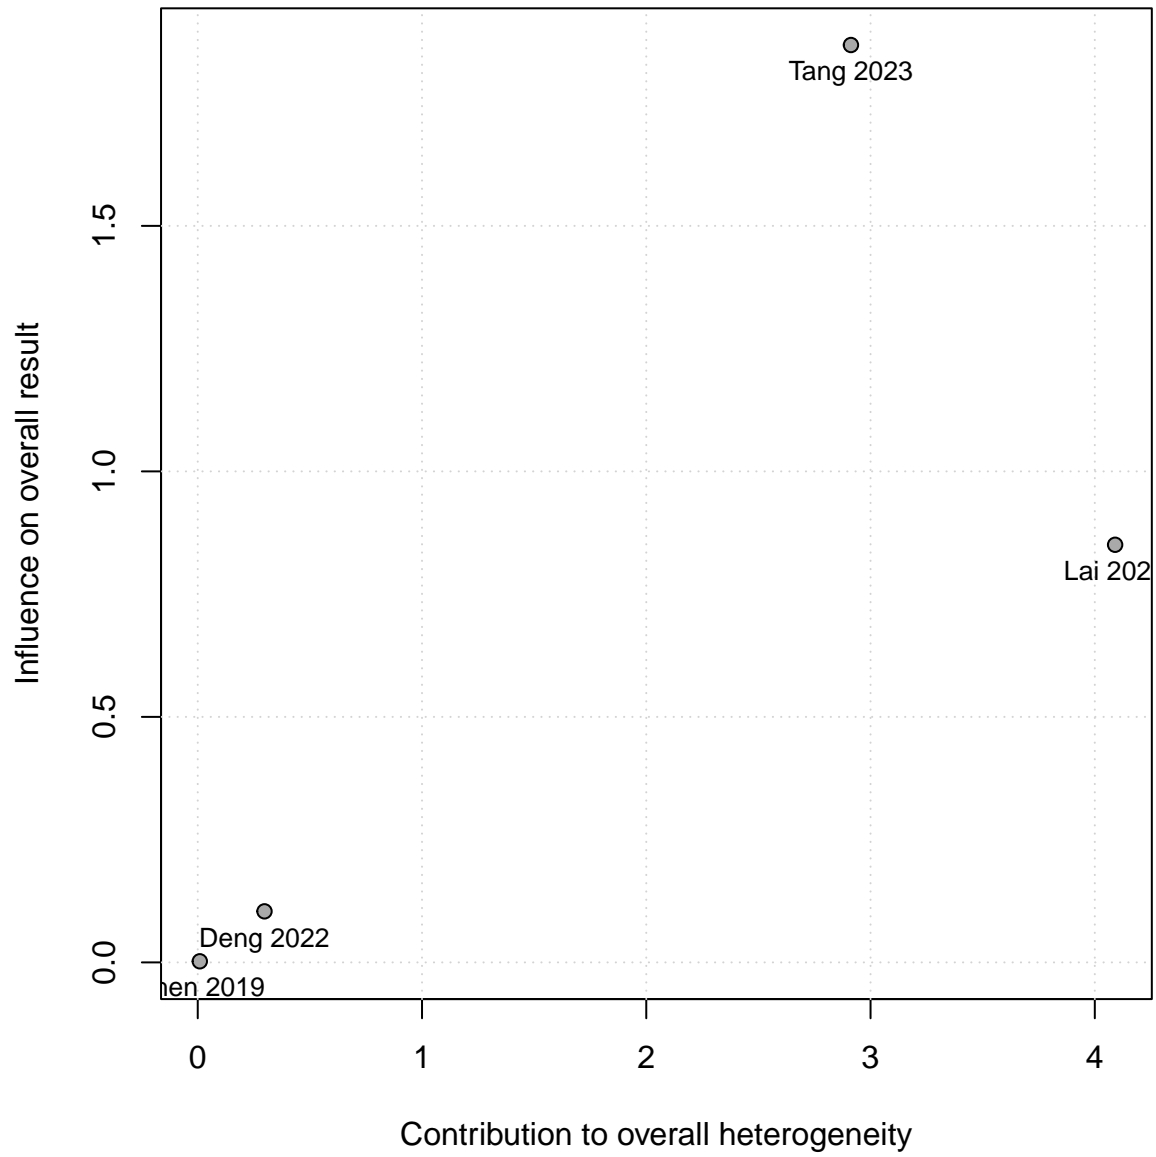

## 12.7.6 Leave one out

```
metainf(comp_metabin)
```

```
## Influential analysis (common effect model)
##
##           RR           95%-CI  p-value  tau^2    tau    I^2
## Omitting Tang 2023  0.5372 [0.3298; 0.8752]  0.0126  0.0203  0.1423  11.9%
## Omitting Chen 2019  0.3866 [0.2411; 0.6199] < 0.0001  0.4894  0.6996  71.3%
## Omitting Lai 2020   0.3026 [0.1841; 0.4972] < 0.0001  0.0812  0.2849  28.1%
## Omitting Deng 2022  0.3522 [0.2143; 0.5789] < 0.0001  0.5062  0.7115  71.3%
##
## Pooled estimate    0.3823 [0.2508; 0.5825] < 0.0001  0.2715  0.5211  57.8%
##
## Details on meta-analytical method:
## - Mantel-Haenszel method
## - Restricted maximum-likelihood estimator for tau^2
```

## 12.8 Fever

### 12.8.1 Meta-analysis

```
fever_metabin <- metabin(data = minipcnl_only,
                        event.c = fever_n_control,
                        n.c = sample_size_control,
                        event.e = fever_n_suction,
                        n.e = sample_size_suction,
                        studlab = author_year)

fever_metabin

## Number of studies: k = 4
## Number of observations: o = 473
## Number of events: e = 35
##
##              RR          95%-CI      z p-value
## Common effect model 0.6409 [0.3280; 1.2522] -1.30 0.1930
## Random effects model 0.7017 [0.3485; 1.4129] -0.99 0.3212
##
## Quantifying heterogeneity:
## tau^2 = 0 [0.0000; 6.7656]; tau = 0 [0.0000; 2.6011]
## I^2 = 0.0% [0.0%; 84.7%]; H = 1.00 [1.00; 2.56]
##
## Test of heterogeneity:
##      Q d.f. p-value
## 2.88   3 0.4099
##
## Details on meta-analytical method:
## - Mantel-Haenszel method
## - Inverse variance method
## - Restricted maximum-likelihood estimator for tau^2
## - Q-Profile method for confidence interval of tau^2 and tau
```

## 12.8.2 Forest plot

```
forest(fever_metabin,
       sortvar = TE)
```

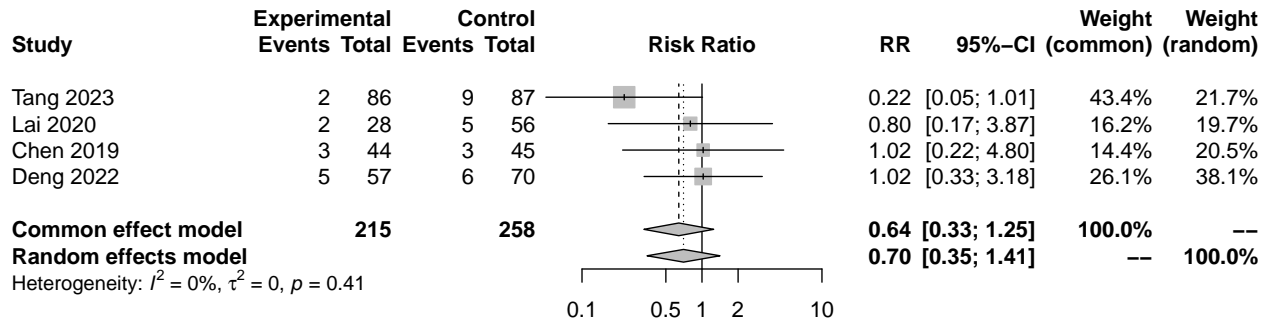

### 12.8.3 Trim and Fill

```
trimfill(fever_metabin)
```

```
## Number of studies: k = 4 (with 0 added studies)
## Number of observations: o = 473
## Number of events: e = 35
##
##                               RR           95%-CI      z p-value
## Random effects model 0.7017 [0.3485; 1.4129] -0.99  0.3212
##
## Quantifying heterogeneity:
## tau^2 = 0 [0.0000; 6.7656]; tau = 0 [0.0000; 2.6011]
## I^2 = 0.0% [0.0%; 84.7%]; H = 1.00 [1.00; 2.56]
##
## Test of heterogeneity:
##      Q d.f. p-value
## 2.88   3  0.4099
##
## Details on meta-analytical method:
## - Inverse variance method
## - Restricted maximum-likelihood estimator for tau^2
## - Q-Profile method for confidence interval of tau^2 and tau
## - Trim-and-fill method to adjust for funnel plot asymmetry (L-estimator)
forest(trimfill(fever_metabin),
       sortvar = TE)
```

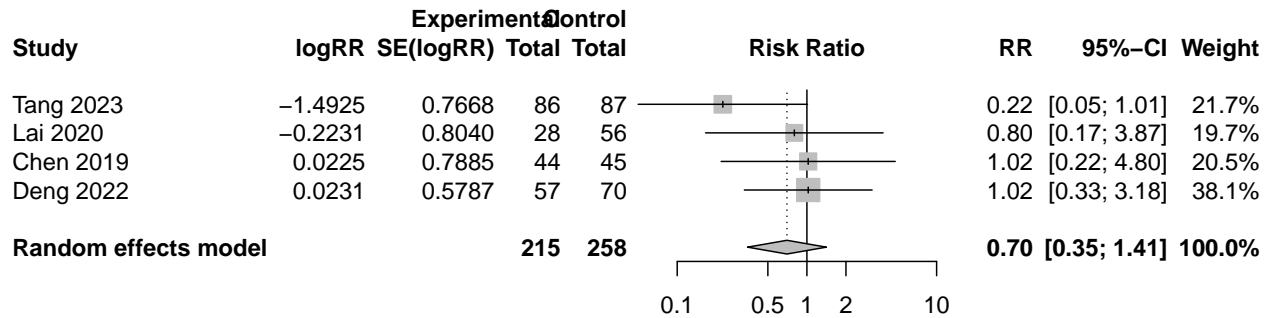

### 12.8.4 Funnel plot

```
funnel(trimfill(fever_metabin))
```

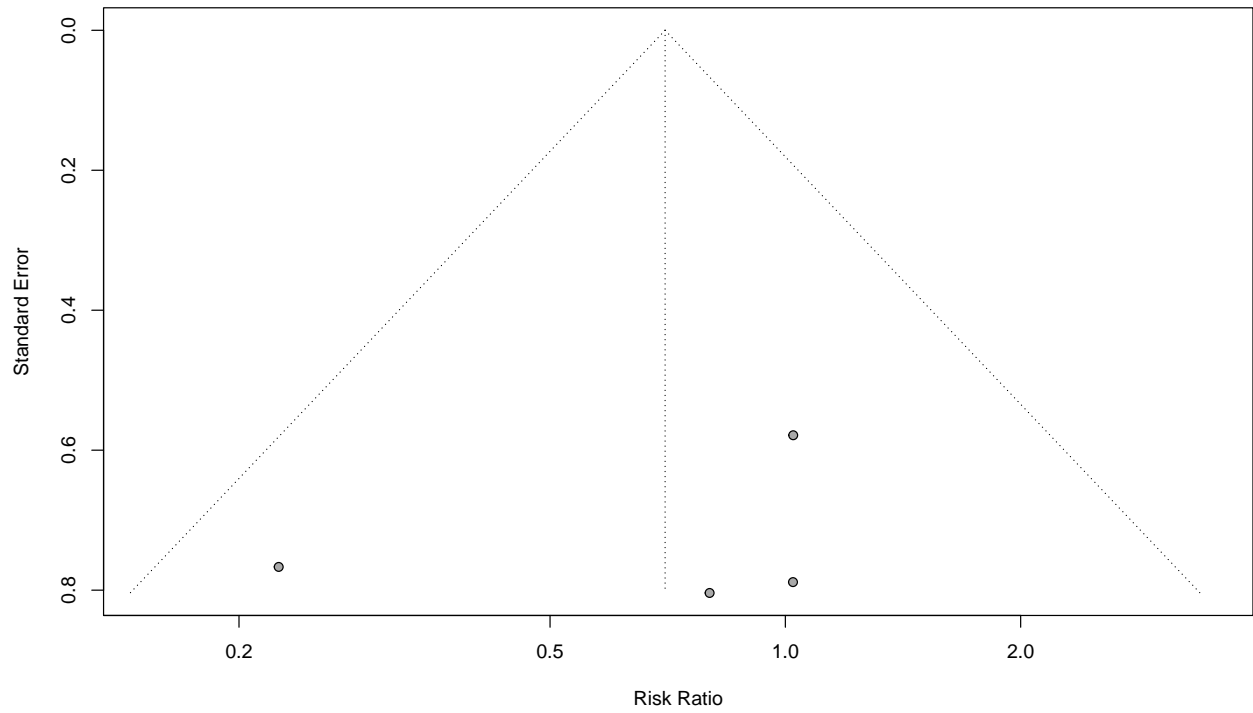

### 12.8.5 Baujat

```
baujat(fever_metabin, pos = 1)
```

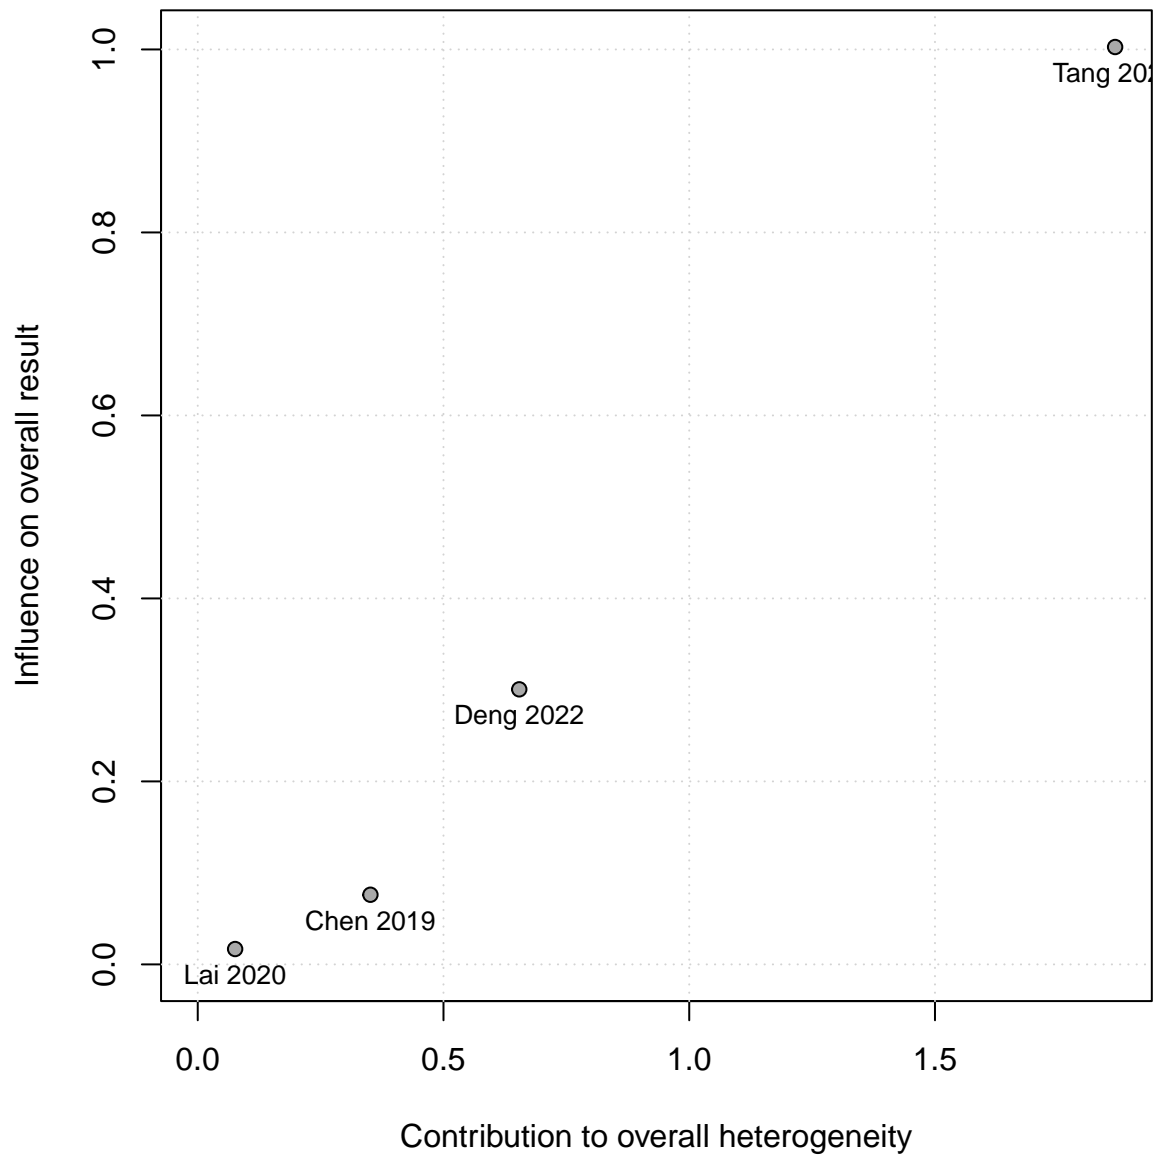



## 12.8.6 Leave one out

```
metainf(fever_metabin)
```

```
## Influential analysis (common effect model)
##
##           RR           95%-CI p-value  tau^2    tau    I^2
## Omitting Tang 2023  0.9595 [0.4355; 2.1139]  0.9183  0.0000  0.0000  0.0%
## Omitting Chen 2019  0.5768 [0.2728; 1.2194]  0.1497  0.1571  0.3963  23.0%
## Omitting Lai 2020   0.6102 [0.2908; 1.2805]  0.1915  0.1959  0.4426  29.8%
## Omitting Deng 2022  0.5058 [0.2170; 1.1790]  0.1144  0.0752  0.2743  9.0%
##
## Pooled estimate    0.6409 [0.3280; 1.2522]  0.1930  0.0000  0.0000  0.0%
##
## Details on meta-analytical method:
## - Mantel-Haenszel method
## - Restricted maximum-likelihood estimator for tau^2
```

## 12.9 Infections

### 12.9.1 Meta-analysis

```
infection_metabin <- metabin(data = minipcni_only,
                             event.c = infection_n_control,
                             n.c = sample_size_control,
                             event.e = infection_n_suction,
                             n.e = sample_size_suction,
                             studlab = author_year)

infection_metabin

## Number of studies: k = 4
## Number of observations: o = 473
## Number of events: e = 31
##
##              RR          95%-CI      z p-value
## Common effect model 0.6381 [0.3152; 1.2918] -1.25 0.2119
## Random effects model 0.7003 [0.3191; 1.5367] -0.89 0.3743
##
## Quantifying heterogeneity:
## tau^2 = 0.0588 [0.0000; 7.2737]; tau = 0.2426 [0.0000; 2.6970]
## I^2 = 0.0% [0.0%; 84.7%]; H = 1.00 [1.00; 2.56]
##
## Test of heterogeneity:
##      Q d.f. p-value
## 2.94   3 0.4004
##
## Details on meta-analytical method:
## - Mantel-Haenszel method
## - Inverse variance method
## - Restricted maximum-likelihood estimator for tau^2
## - Q-Profile method for confidence interval of tau^2 and tau
```

### 12.9.2 Forest plot

```
forest(infection_metabin,
       sortvar = TE)
```

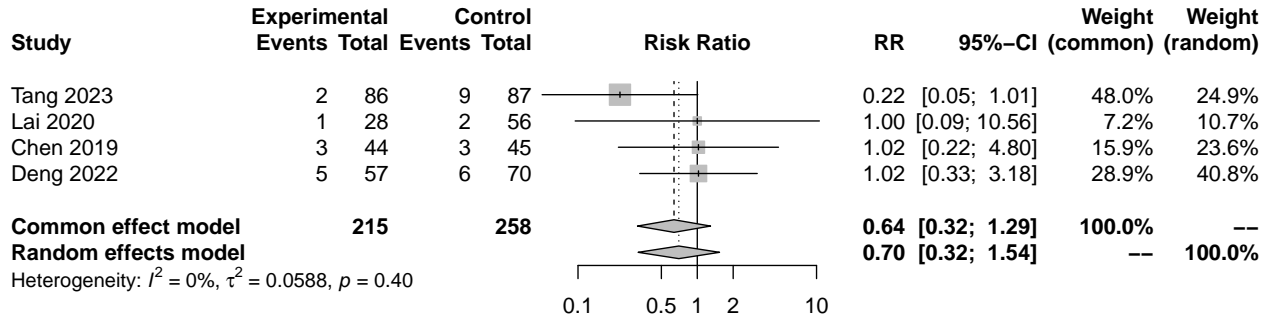

### 12.9.3 Trim and Fill

```
trimfill(infection_metabin)
```

```
## Number of studies: k = 4 (with 0 added studies)
## Number of observations: o = 473
## Number of events: e = 31
##
##
##          RR          95%-CI      z p-value
## Random effects model 0.7003 [0.3191; 1.5367] -0.89 0.3743
##
## Quantifying heterogeneity:
## tau^2 = 0.0588 [0.0000; 7.2737]; tau = 0.2426 [0.0000; 2.6970]
## I^2 = 0.0% [0.0%; 84.7%]; H = 1.00 [1.00; 2.56]
##
## Test of heterogeneity:
##      Q d.f. p-value
## 2.94   3 0.4004
##
## Details on meta-analytical method:
## - Inverse variance method
## - Restricted maximum-likelihood estimator for tau^2
## - Q-Profile method for confidence interval of tau^2 and tau
## - Trim-and-fill method to adjust for funnel plot asymmetry (L-estimator)
forest(trimfill(infection_metabin),
        sortvar = TE)
```

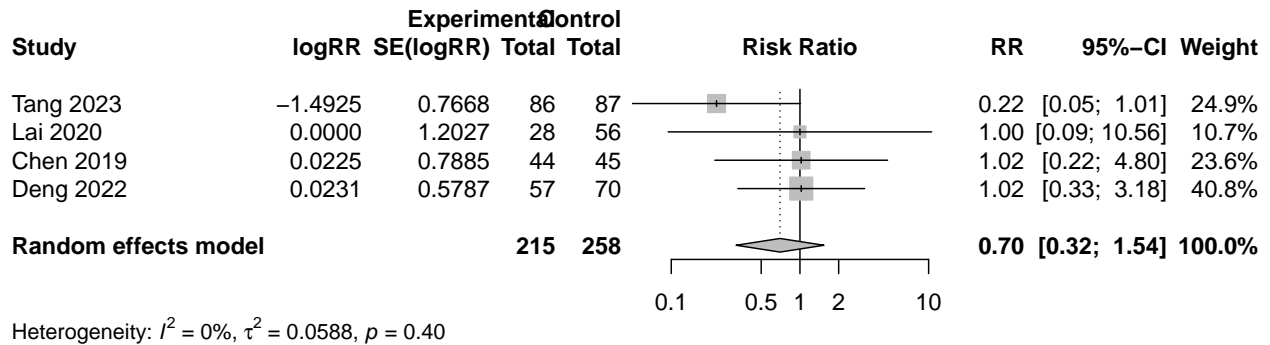

### 12.9.4 Funnel plot

```
funnel(trimfill(infection_metabin))
```

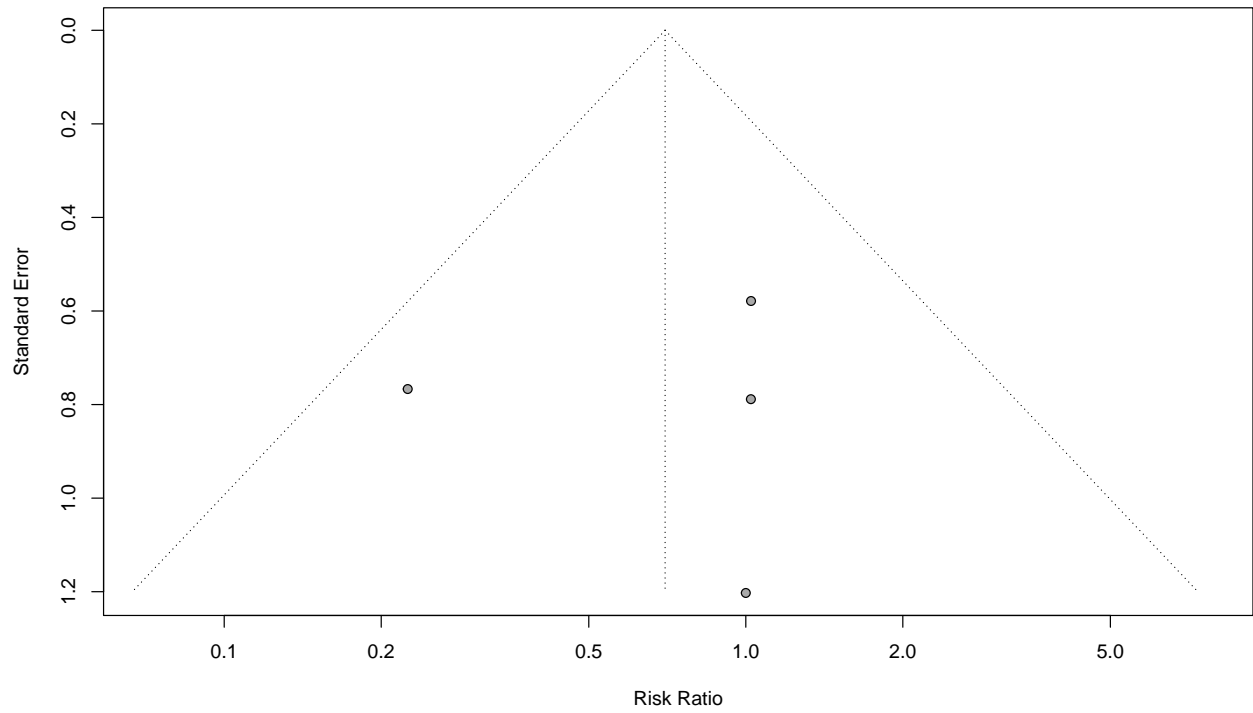

### 12.9.5 Baujat

```
baujat(infection_metabin, pos = 1)
```

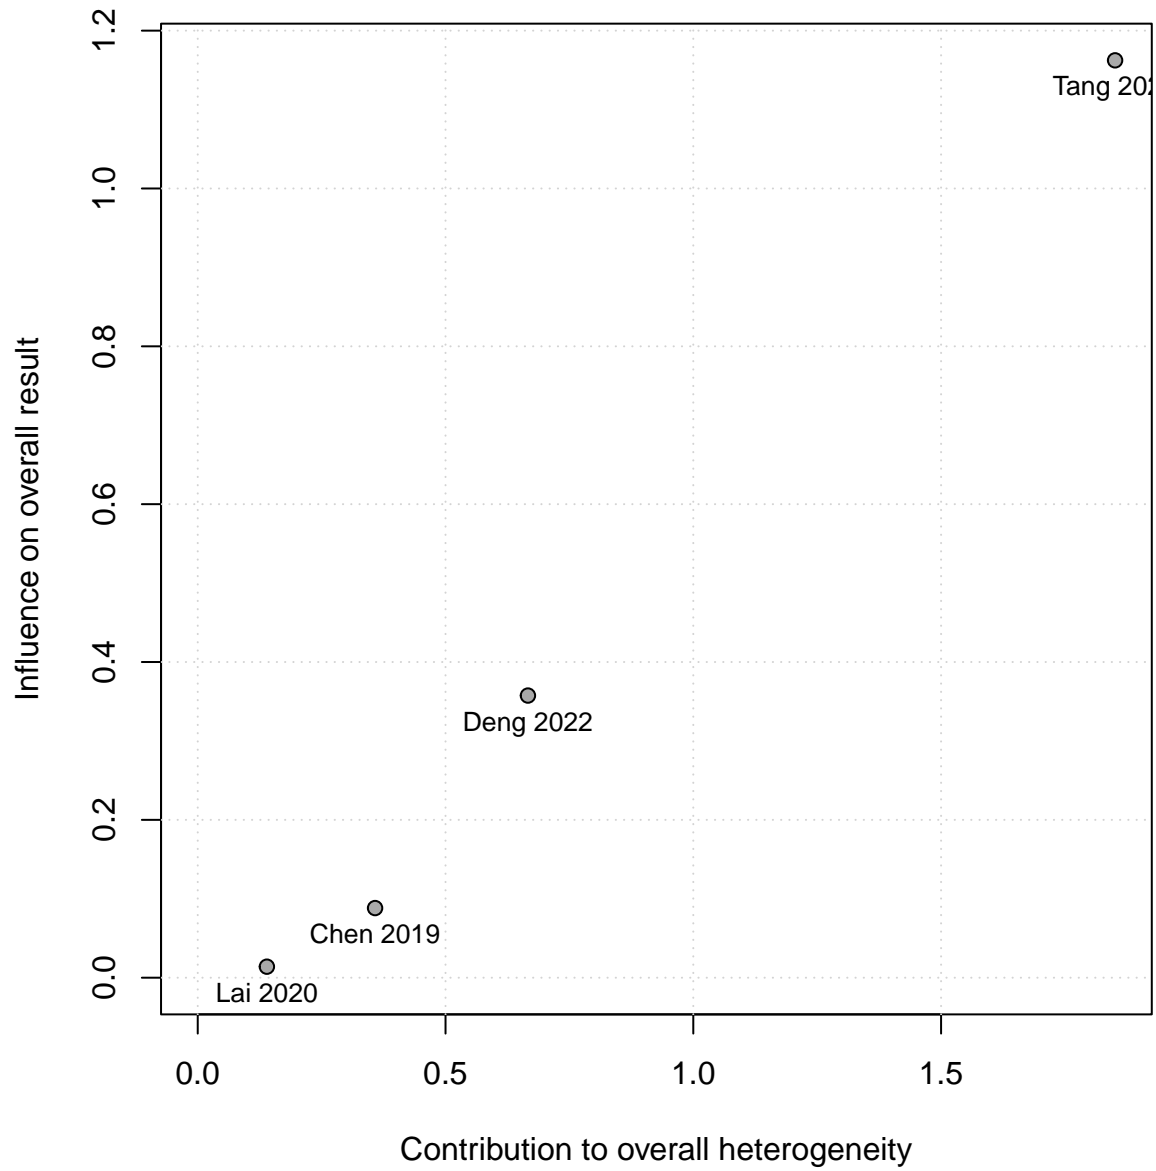

## 12.9.6 Leave one out

```
metainf(infection_metabin)
```

```
## Influential analysis (common effect model)
##
##           RR           95%-CI p-value  tau^2    tau    I^2
## Omitting Tang 2023  1.0200 [0.4348; 2.3926]  0.9637  0.0000  0.0000  0.0%
## Omitting Chen 2019  0.5653 [0.2541; 1.2576]  0.1621  0.2938  0.5421  24.7%
## Omitting Lai 2020   0.6102 [0.2908; 1.2805]  0.1915  0.1959  0.4426  29.8%
## Omitting Deng 2022  0.4815 [0.1913; 1.2121]  0.1208  0.2048  0.4526  10.1%
##
## Pooled estimate    0.6381 [0.3152; 1.2918]  0.2119  0.0588  0.2426  0.0%
##
## Details on meta-analytical method:
## - Mantel-Haenszel method
## - Restricted maximum-likelihood estimator for tau^2
```

## 12.10 Sepsis

### 12.10.1 Meta-analysis

```
sepsis_metabin <- metabin(data = minipcnl_only,
                          event.c = sepsis_n_control,
                          n.c = sample_size_control,
                          event.e = sepsis_n_suction,
                          n.e = sample_size_suction,
                          studlab = author_year)

sepsis_metabin

## Number of studies: k = 1
## Number of observations: o = 473
## Number of events: e = 4
##
##              RR          95%-CI      z p-value
## Common effect model 0.1124 [0.0061; 2.0562] -1.47 0.1405
## Random effects model 0.1124 [0.0061; 2.0562] -1.47 0.1405
##
## Quantifying heterogeneity:
## tau^2 = NA; tau = NA; I^2 = NA; H = NA
##
## Details on meta-analytical method:
## - Mantel-Haenszel method
## - Inverse variance method
## - Restricted maximum-likelihood estimator for tau^2
## - Continuity correction of 0.5 in studies with zero cell frequencies
```



### 12.10.2 Forest plot

```
forest(sepsis_metabin,
       sortvar = TE)
```

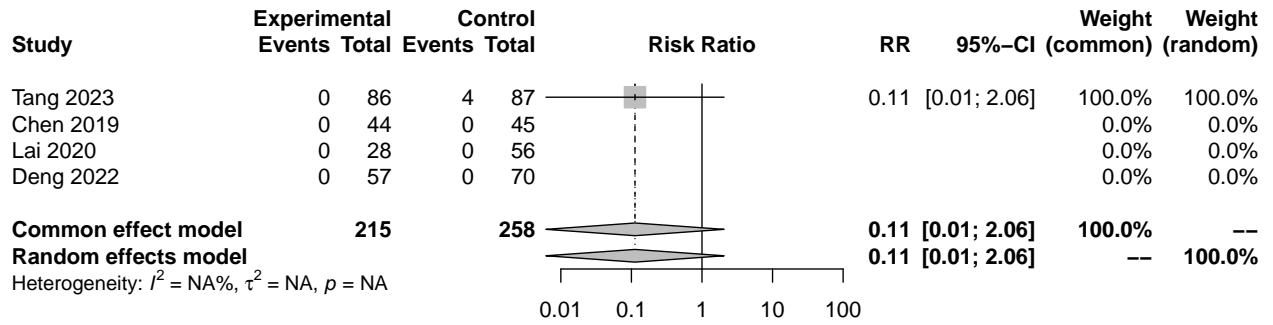

### 12.10.3 Trim and Fill

```
#trimfill(sepsis_metabin)  
#forest(trimfill(sepsis_metabin),  
#      sortvar = TE)
```

### 12.10.4 Funnel plot

```
funnel((sepsis_metabin))
```

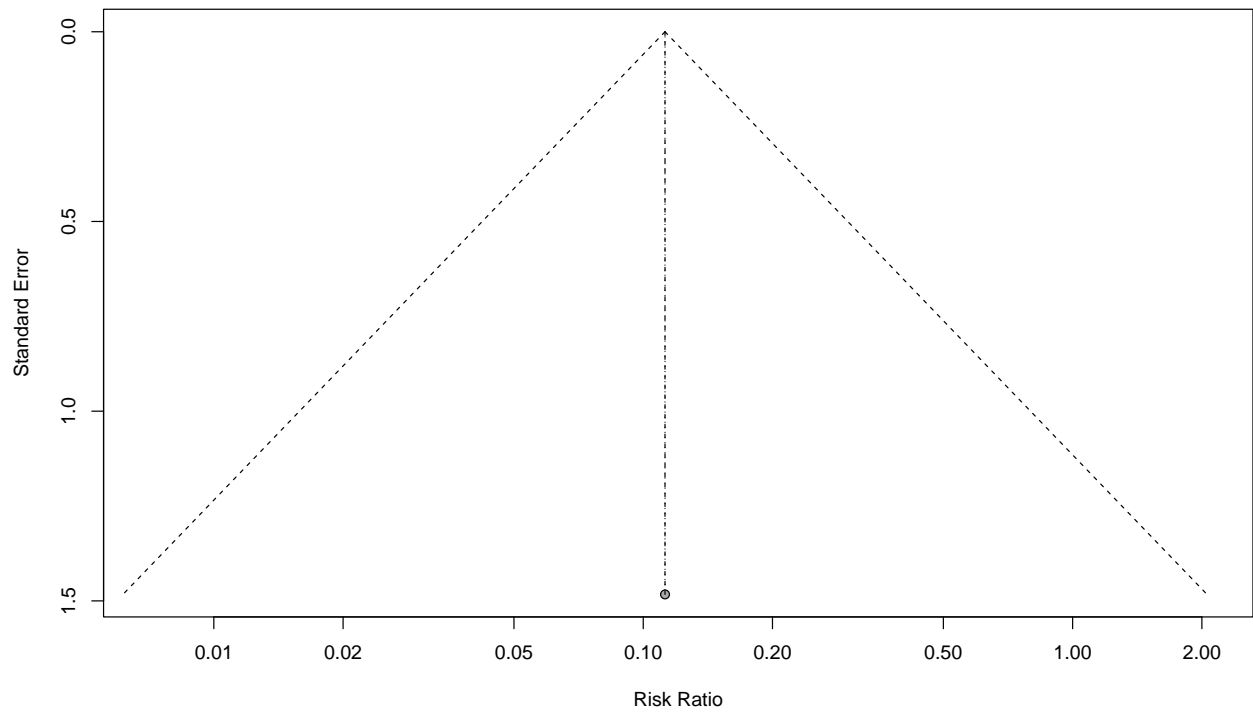

### 12.10.5 Baujat

```
baujat(sepsis_metabin, pos = 1)
```



### 12.10.6 Leave one out

```
metainf(sepsis_metabin)
```

```
## Influential analysis (common effect model)
##
##           RR           95%-CI p-value tau^2 tau I^2
## Omitting Tang 2023
## Omitting Chen 2019 0.1124 [0.0061; 2.0562] 0.1405
## Omitting Lai 2020 0.1124 [0.0061; 2.0562] 0.1405
## Omitting Deng 2022 0.1124 [0.0061; 2.0562] 0.1405
##
## Pooled estimate 0.1124 [0.0061; 2.0562] 0.1405
##
## Details on meta-analytical method:
## - Mantel-Haenszel method
## - Restricted maximum-likelihood estimator for tau^2
```

## 12.11 Abscess

### 12.11.1 Meta-analysis

```
abscess_metabin <- metabin(data = minipcnl_only,
                          event.c = abscess_n_control,
                          n.c = sample_size_control,
                          event.e = abscess_n_suction,
                          n.e = sample_size_suction,
                          studlab = author_year)

abscess_metabin

## Number of studies: k = 0
## Number of observations: o = 473
## Number of events: e = 0
##
##                RR 95%-CI  z p-value
## Common effect model  NA      --      --
## Random effects model NA      --      --
##
## Quantifying heterogeneity:
## tau^2 = NA; tau = NA; I^2 = NA; H = NA
##
## Details on meta-analytical method:
## - Mantel-Haenszel method
## - Inverse variance method
## - Restricted maximum-likelihood estimator for tau^2
```

### 12.11.2 Forest plot

```
forest(abscess_metabin,
       sortvar = TE)
```

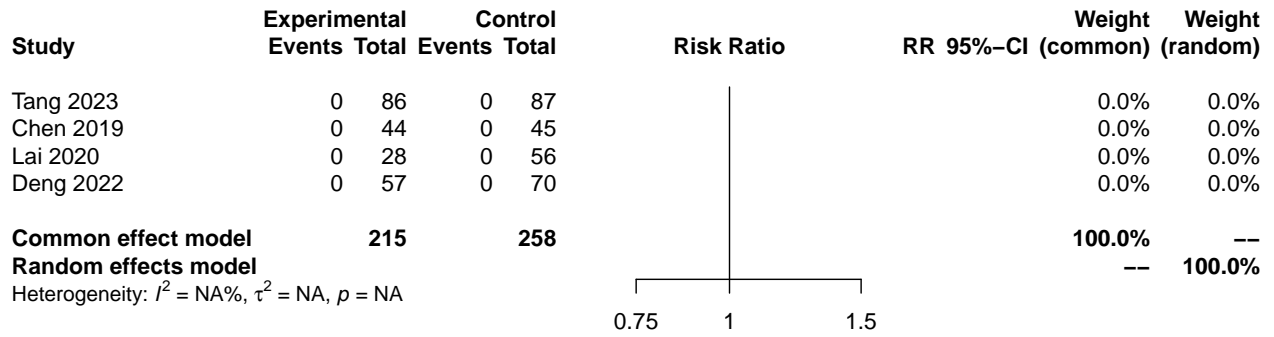

### 12.11.3 Trim and Fill

```
#trimfill(abscess_metabin)  
#forest(trimfill(abscess_metabin),  
#      sortvar = TE)
```



#### 12.11.4 Funnel plot

```
#funnel((abscess_metabin))
```

### 12.11.5 Baujat

```
#baujat(abscess_metabin, pos = 1)
```

### 12.11.6 Leave one out

```
#metainf(abscess_metabin)
```

## 12.12 Haematoma

### 12.12.1 Meta-analysis

```
haematoma_metabin <- metabin(data = minipcml_only,
                             event.c = hematoma_n_control,
                             n.c = sample_size_control,
                             event.e = hematoma_n_suction,
                             n.e = sample_size_suction,
                             studlab = author_year)

haematoma_metabin

## Number of studies: k = 1
## Number of observations: o = 473
## Number of events: e = 1
##
##              RR          95%-CI      z p-value
## Common effect model 0.4080 [0.0169; 9.8294] -0.55 0.5808
## Random effects model 0.4087 [0.0170; 9.8436] -0.55 0.5815
##
## Quantifying heterogeneity:
## tau^2 = NA; tau = NA; I^2 = NA; H = NA
##
## Details on meta-analytical method:
## - Mantel-Haenszel method
## - Inverse variance method
## - Restricted maximum-likelihood estimator for tau^2
## - Continuity correction of 0.5 in studies with zero cell frequencies
```

### 12.12.2 Forest plot

```
forest(haematoma_metabin,
       sortvar = TE)
```

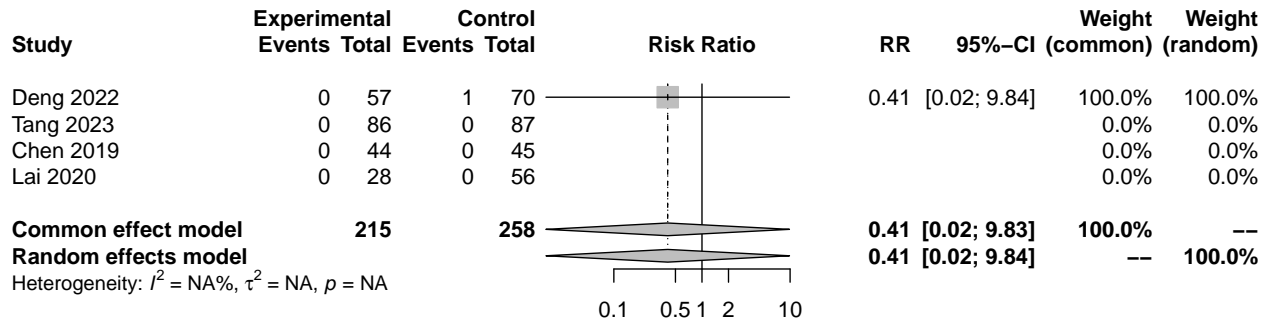

### 12.12.3 Trim and Fill

```
#trimfill(haematoma_metabin)  
#forest(trimfill(haematoma_metabin),  
#      sortvar = TE)
```

### 12.12.4 Funnel plot

```
funnel((haematoma_metabin))
```

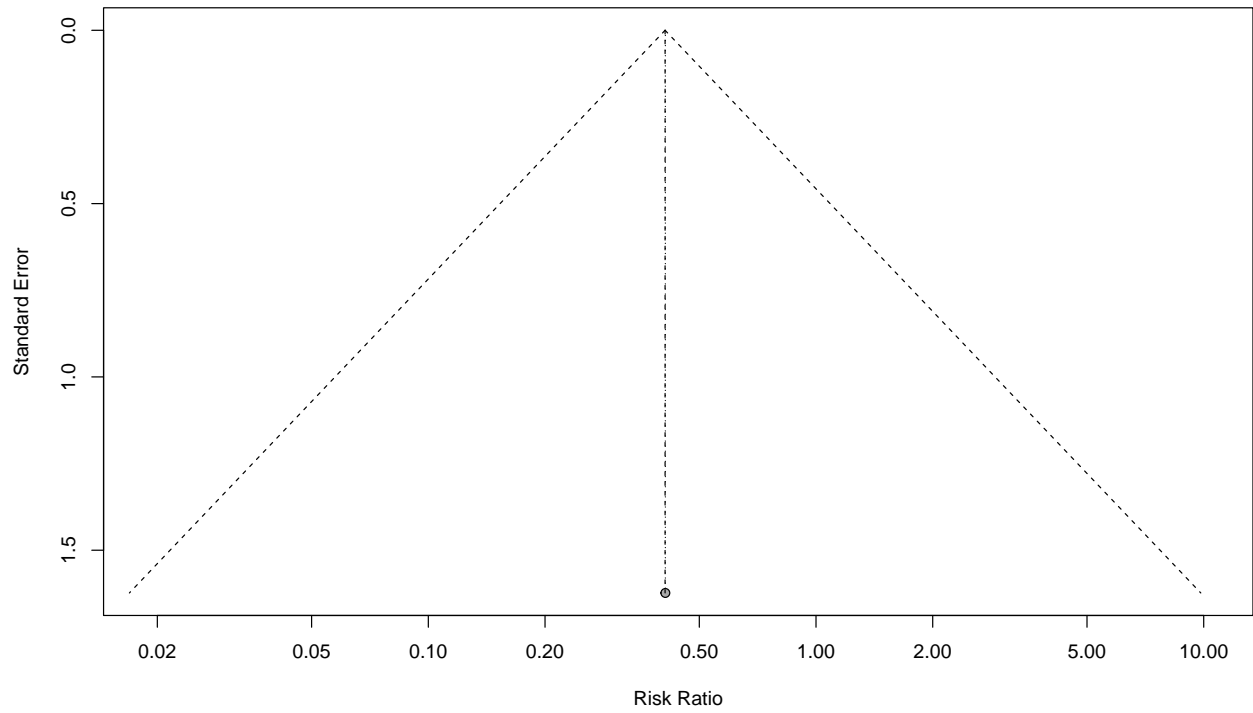

### 12.12.5 Baujat

```
baujat(haematoma_metabin, pos = 1)
```





### 12.12.6 Leave one out

```
metainf(haematoma_metabin)
```

```
## Influential analysis (common effect model)
##
##           RR           95%-CI p-value tau^2 tau I^2
## Omitting Tang 2023 0.4080 [0.0169; 9.8294] 0.5808
## Omitting Chen 2019 0.4080 [0.0169; 9.8294] 0.5808
## Omitting Lai 2020  0.4080 [0.0169; 9.8294] 0.5808
## Omitting Deng 2022
##
## Pooled estimate    0.4080 [0.0169; 9.8294] 0.5808
##
## Details on meta-analytical method:
## - Mantel-Haenszel method
## - Restricted maximum-likelihood estimator for tau^2
```

## 12.13 Pain

### 12.13.1 Meta-analysis

```
pain_metabin <- metabin(data = minipcnl_only,
                        event.c = pain_n_control,
                        n.c = sample_size_control,
                        event.e = pain_n_suction,
                        n.e = sample_size_suction,
                        studlab = author_year)

pain_metabin

## Number of studies: k = 2
## Number of observations: o = 473
## Number of events: e = 24
##
##              RR          95%-CI      z p-value
## Common effect model 0.2033 [0.0715; 0.5781] -2.99 0.0028
## Random effects model 0.2107 [0.0737; 0.6027] -2.90 0.0037
##
## Quantifying heterogeneity:
## tau^2 = 0; tau = 0; I^2 = 0.0%; H = 1.00
##
## Test of heterogeneity:
##      Q d.f. p-value
## 0.34  1 0.5572
##
## Details on meta-analytical method:
## - Mantel-Haenszel method
## - Inverse variance method
## - Restricted maximum-likelihood estimator for tau^2
```

### 12.13.2 Forest plot

```
forest(pain_metabin,
       sortvar = TE)
```

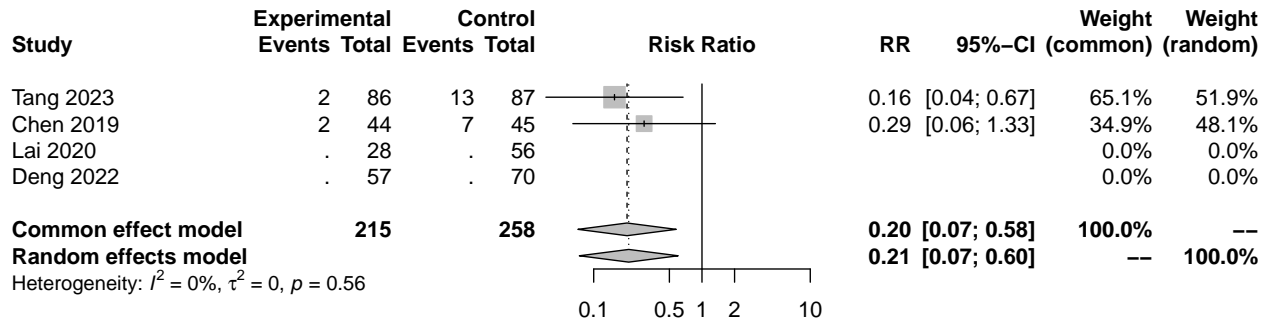

### 12.13.3 Trim and Fill

```
#trimfill(pain_metabin)  
#forest(trimfill(pain_metabin),  
#      sortvar = TE)
```

### 12.13.4 Funnel plot

```
funnel((pain_metabin))
```

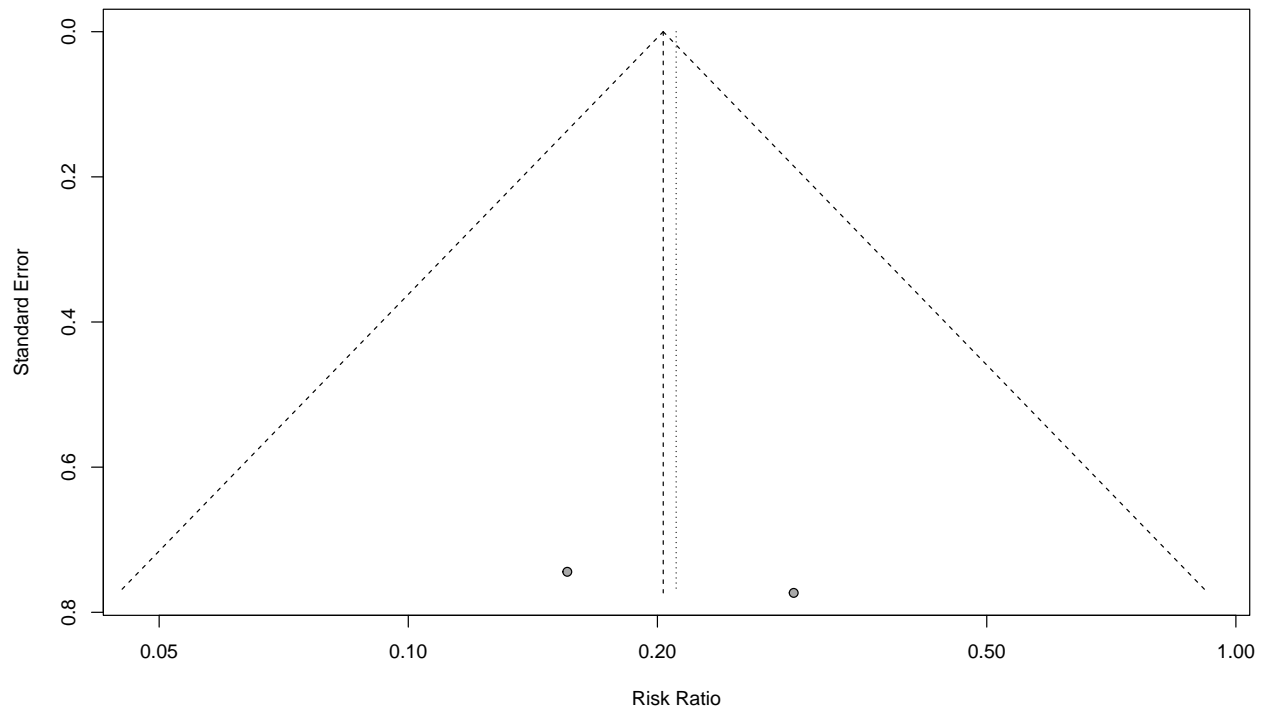

### 12.13.5 Baujat

```
baujat(pain_metabin, pos = 1)
```

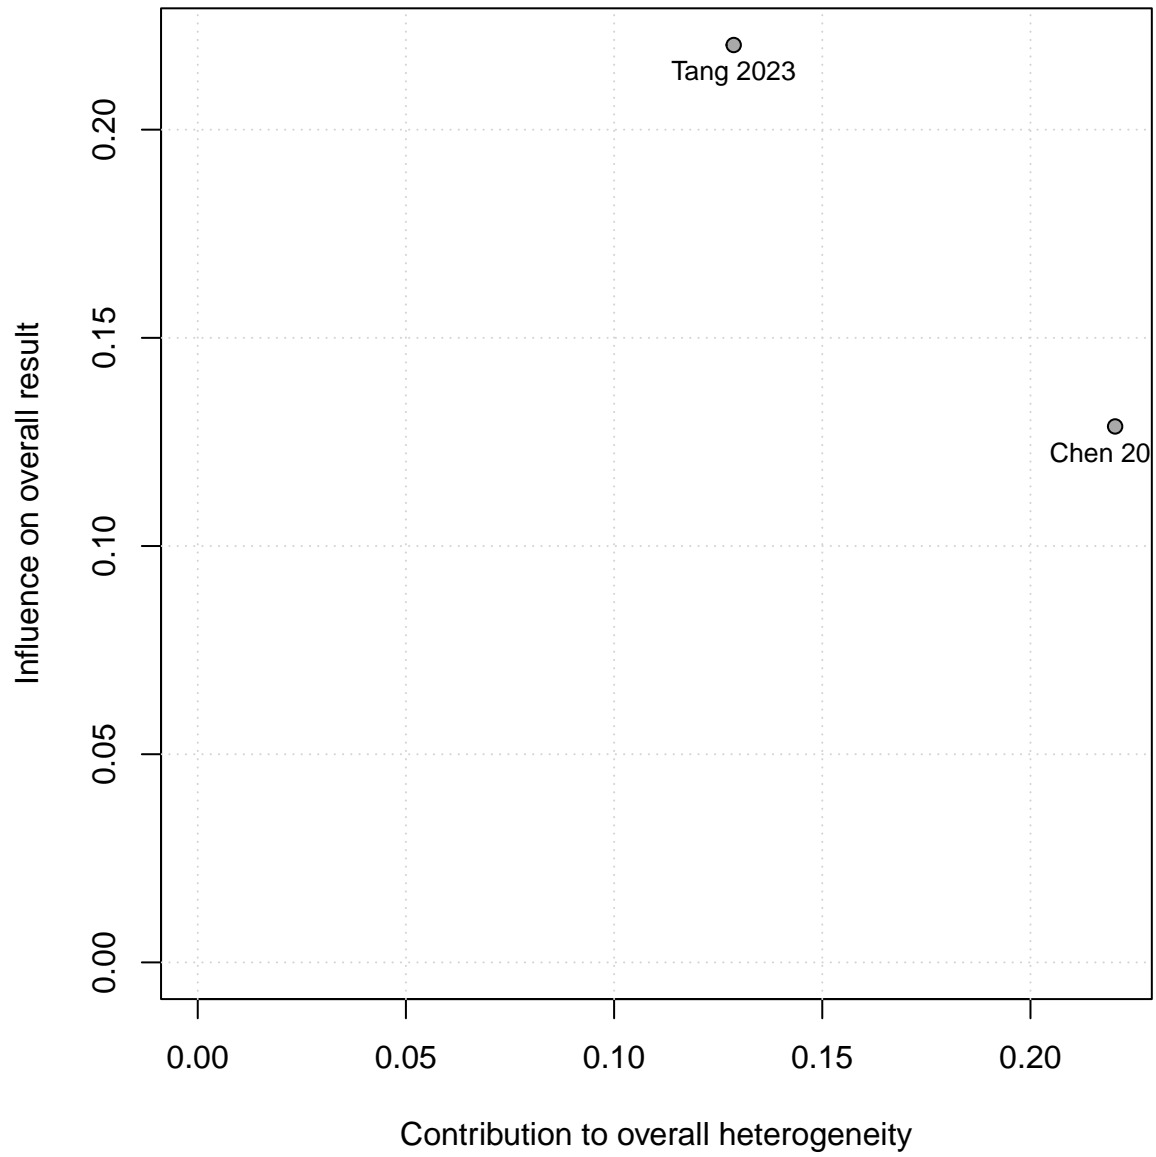

### 12.13.6 Leave one out

```
metainf(pain_metabin, pos = 1)
```

```
## Influential analysis (common effect model)
##
##           RR           95%-CI p-value  tau^2    tau    I^2
## Omitting Tang 2023  0.2922 [0.0642; 1.3301]  0.1116
## Omitting Chen 2019  0.1556 [0.0362; 0.6692]  0.0124
## Omitting Lai 2020   0.2033 [0.0715; 0.5781]  0.0028  0.0000  0.0000  0.0%
## Omitting Deng 2022  0.2033 [0.0715; 0.5781]  0.0028  0.0000  0.0000  0.0%
##
## Pooled estimate    0.2033 [0.0715; 0.5781]  0.0028  0.0000  0.0000  0.0%
##
## Details on meta-analytical method:
## - Mantel-Haenszel method
## - Restricted maximum-likelihood estimator for tau^2
```

## 12.14 Stricture

### 12.14.1 Meta-analysis

```
stricture_metabin <- metabin(data = minipcml_only,  
                             event.c = stricture_n_control,  
                             n.c = sample_size_control,  
                             event.e = stricture_n_suction,  
                             n.e = sample_size_suction,  
                             studlab = author_year)
```

```
stricture_metabin
```

```
## Number of studies: k = 0  
## Number of observations: o = 473  
## Number of events: e = 0  
##  
##                RR 95%-CI  z p-value  
## Common effect model  NA      --      --  
## Random effects model NA      --      --  
##  
## Quantifying heterogeneity:  
## tau^2 = NA; tau = NA; I^2 = NA; H = NA  
##  
## Details on meta-analytical method:  
## - Mantel-Haenszel method  
## - Inverse variance method  
## - Restricted maximum-likelihood estimator for tau^2
```



### 12.14.2 Forest plot

```
forest(stricture_metabin,
       sortvar = TE)
```

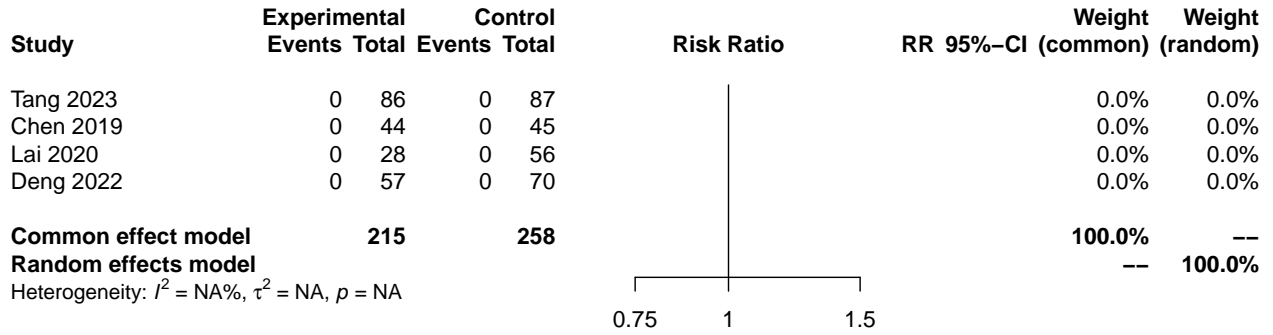

### 12.14.3 Trim and Fill

```
#trimfill(stricture_metabin)  
#forest(trimfill(stricture_metabin),  
#      sortvar = TE)
```

#### 12.14.4 Funnel plot

```
#funnel((stricture_metabin))
```

### 12.14.5 Baujat

```
#baujat(structure_metabin, pos = 1)
```

#### 12.14.6 Leave one out

```
#metainf(structure_metabin)
```

## 12.15 Embolisation required

### 12.15.1 Meta-analysis

```
ir_embolisation_metabin <- metabin(data = minipcnl_only,
                                   event.c = embolism_ir_intervention_n_control,
                                   n.c = sample_size_control,
                                   event.e = embolism_ir_intervention_n_suction,
                                   n.e = sample_size_suction,
                                   studlab = author_year)
ir_embolisation_metabin

## Number of studies: k = 2
## Number of observations: o = 473
## Number of events: e = 3
##
##              RR          95%-CI      z p-value
## Common effect model 0.2830 [0.0318; 2.5161] -1.13 0.2575
## Random effects model 0.2867 [0.0322; 2.5524] -1.12 0.2627
##
## Quantifying heterogeneity:
## tau^2 = 0; tau = 0; I^2 = 0.0%; H = 1.00
##
## Test of heterogeneity:
##      Q d.f. p-value
## 0.02   1 0.8828
##
## Details on meta-analytical method:
## - Mantel-Haenszel method
## - Inverse variance method
## - Restricted maximum-likelihood estimator for tau^2
## - Continuity correction of 0.5 in studies with zero cell frequencies
```

### 12.15.2 Forest plot

```
forest(ir_embolisation_metabin,
       sortvar = TE)
```

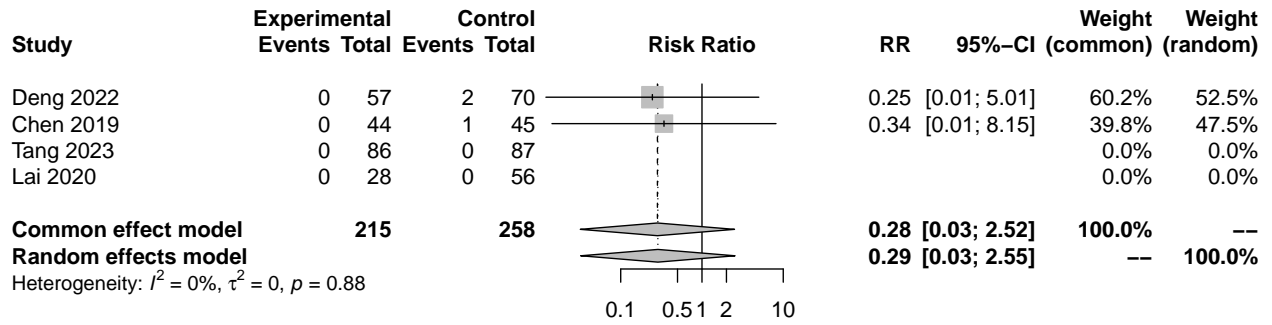

### 12.15.3 Trim and Fill

```
#trimfill(ir_embolisation_metabin)  
#forest(trimfill(ir_embolisation_metabin),  
#      sortvar = TE)
```



### 12.15.4 Funnel plot

```
funnel((ir_embolisation_metabin))
```

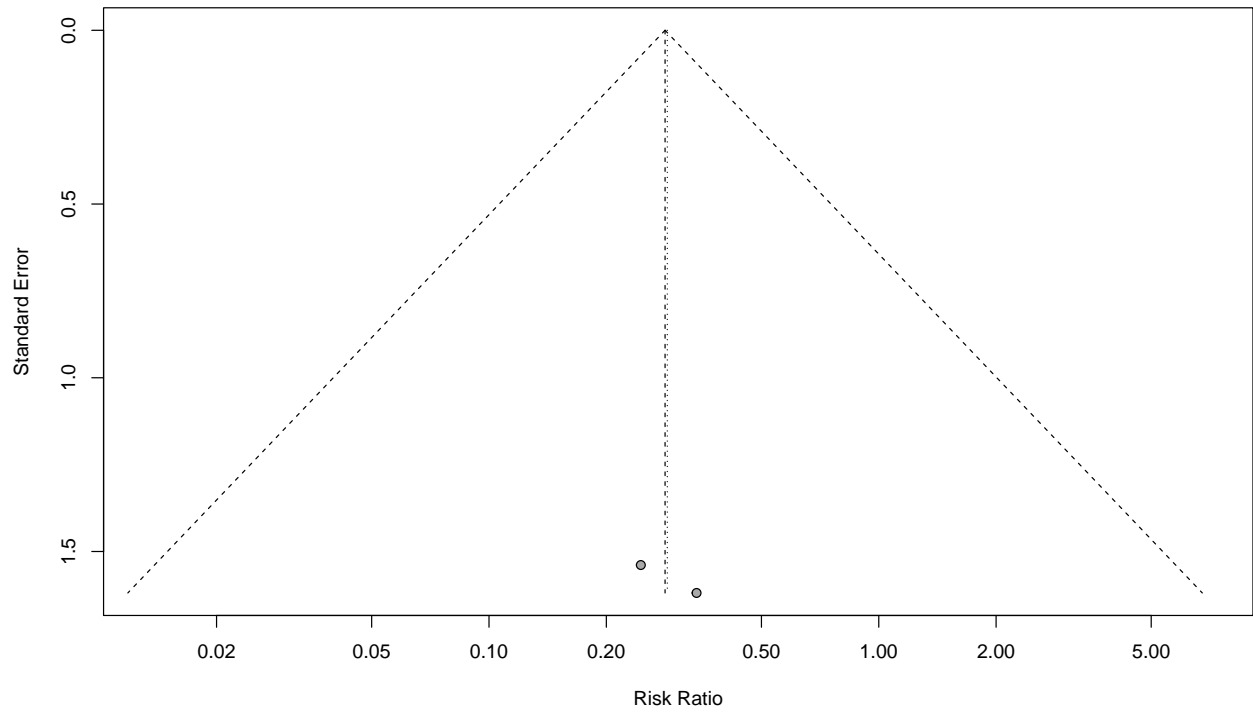

### 12.15.5 Baujat

```
baujat(ir_embolisation_metabin, pos = 1)
```

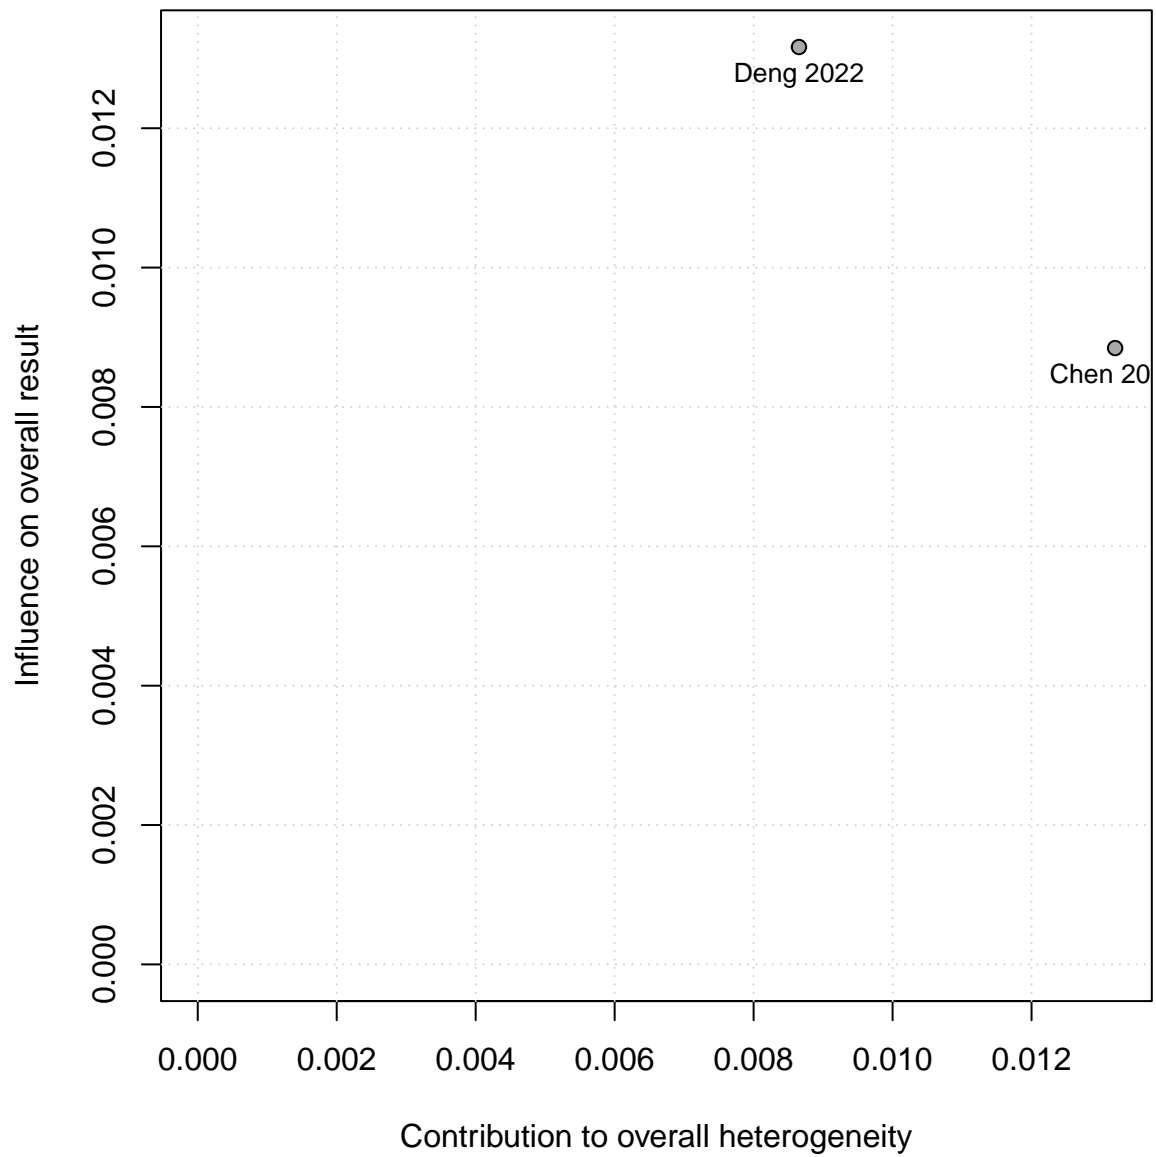

### 12.15.6 Leave one out

```
metainf(ir_embolisation_metabin)
```

```
## Influential analysis (common effect model)
##
##           RR           95%-CI p-value  tau^2    tau    I^2
## Omitting Tang 2023  0.2830 [0.0318; 2.5161]  0.2575  0.0000  0.0000  0.0%
## Omitting Chen 2019  0.2448 [0.0120; 4.9992]  0.3605  0.0000  0.0000  0.0%
## Omitting Lai 2020   0.2830 [0.0318; 2.5161]  0.2575  0.0000  0.0000  0.0%
## Omitting Deng 2022  0.3407 [0.0143; 8.1456]  0.5062  0.0000  0.0000  0.0%
##
## Pooled estimate    0.2830 [0.0318; 2.5161]  0.2575  0.0000  0.0000  0.0%
##
## Details on meta-analytical method:
## - Mantel-Haenszel method
## - Restricted maximum-likelihood estimator for tau^2
```

## 12.16 Transfusion

### 12.16.1 Meta-analysis

```
transfusion_metabin <- metabin(data = minipcni_only,
                               event.c = transfusion_n_control,
                               n.c = sample_size_control,
                               event.e = transfusion_n_suction,
                               n.e = sample_size_suction,
                               studlab = author_year)

transfusion_metabin

## Number of studies: k = 3
## Number of observations: o = 473
## Number of events: e = 12
##
##              RR          95%-CI      z p-value
## Common effect model 0.1445 [0.0280; 0.7467] -2.31 0.0210
## Random effects model 0.1632 [0.0302; 0.8826] -2.10 0.0353
##
## Quantifying heterogeneity:
## tau^2 = 0 [0.0000; 22.9527]; tau = 0 [0.0000; 4.7909]
## I^2 = 0.0% [0.0%; 89.6%]; H = 1.00 [1.00; 3.10]
##
## Test of heterogeneity:
##      Q d.f. p-value
## 0.57   2 0.7525
##
## Details on meta-analytical method:
## - Mantel-Haenszel method
## - Inverse variance method
## - Restricted maximum-likelihood estimator for tau^2
## - Q-Profile method for confidence interval of tau^2 and tau
## - Continuity correction of 0.5 in studies with zero cell frequencies
```

### 12.16.2 Forest plot

```
forest(transfusion_metabin,
       sortvar = TE)
```

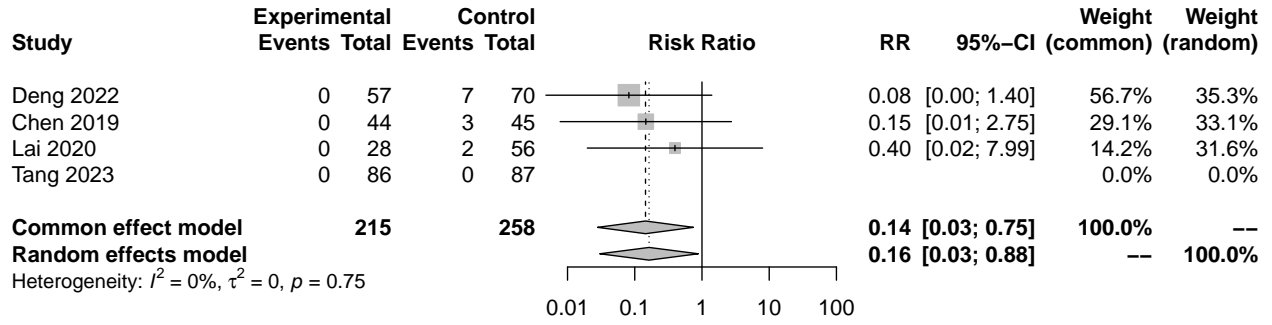

### 12.16.3 Trim and Fill

```
trimfill(transfusion_metabin)
```

```
## Warning in trimfill.meta(transfusion_metabin): 1 observation(s) dropped due to
## missing values

## Number of studies: k = 3 (with 0 added studies)
## Number of observations: o = 300
## Number of events: e = 12
##
##                RR          95%-CI      z p-value
## Random effects model 0.1632 [0.0302; 0.8826] -2.10  0.0353
##
## Quantifying heterogeneity:
## tau^2 = 0 [0.0000; 22.9527]; tau = 0 [0.0000; 4.7909]
## I^2 = 0.0% [0.0%; 89.6%]; H = 1.00 [1.00; 3.10]
##
## Test of heterogeneity:
##      Q d.f. p-value
## 0.57   2  0.7525
##
## Details on meta-analytical method:
## - Inverse variance method
## - Restricted maximum-likelihood estimator for tau^2
## - Q-Profile method for confidence interval of tau^2 and tau
## - Trim-and-fill method to adjust for funnel plot asymmetry (L-estimator)
```

```
forest(trimfill(transfusion_metabin),
        sortvar = TE)
```

```
## Warning in trimfill.meta(transfusion_metabin): 1 observation(s) dropped due to
## missing values
```

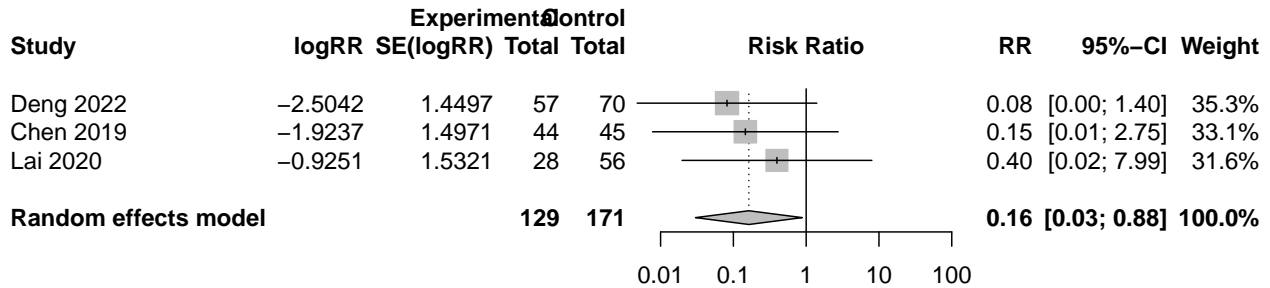

## 12.16.4 Funnel plot

```
funnel(trimfill(transfusion_metabin))
```

```
## Warning in trimfill.meta(transfusion_metabin): 1 observation(s) dropped due to  
## missing values
```



### 12.16.5 Baujat

```
baujat(transfusion_metabin, pos = 1)
```

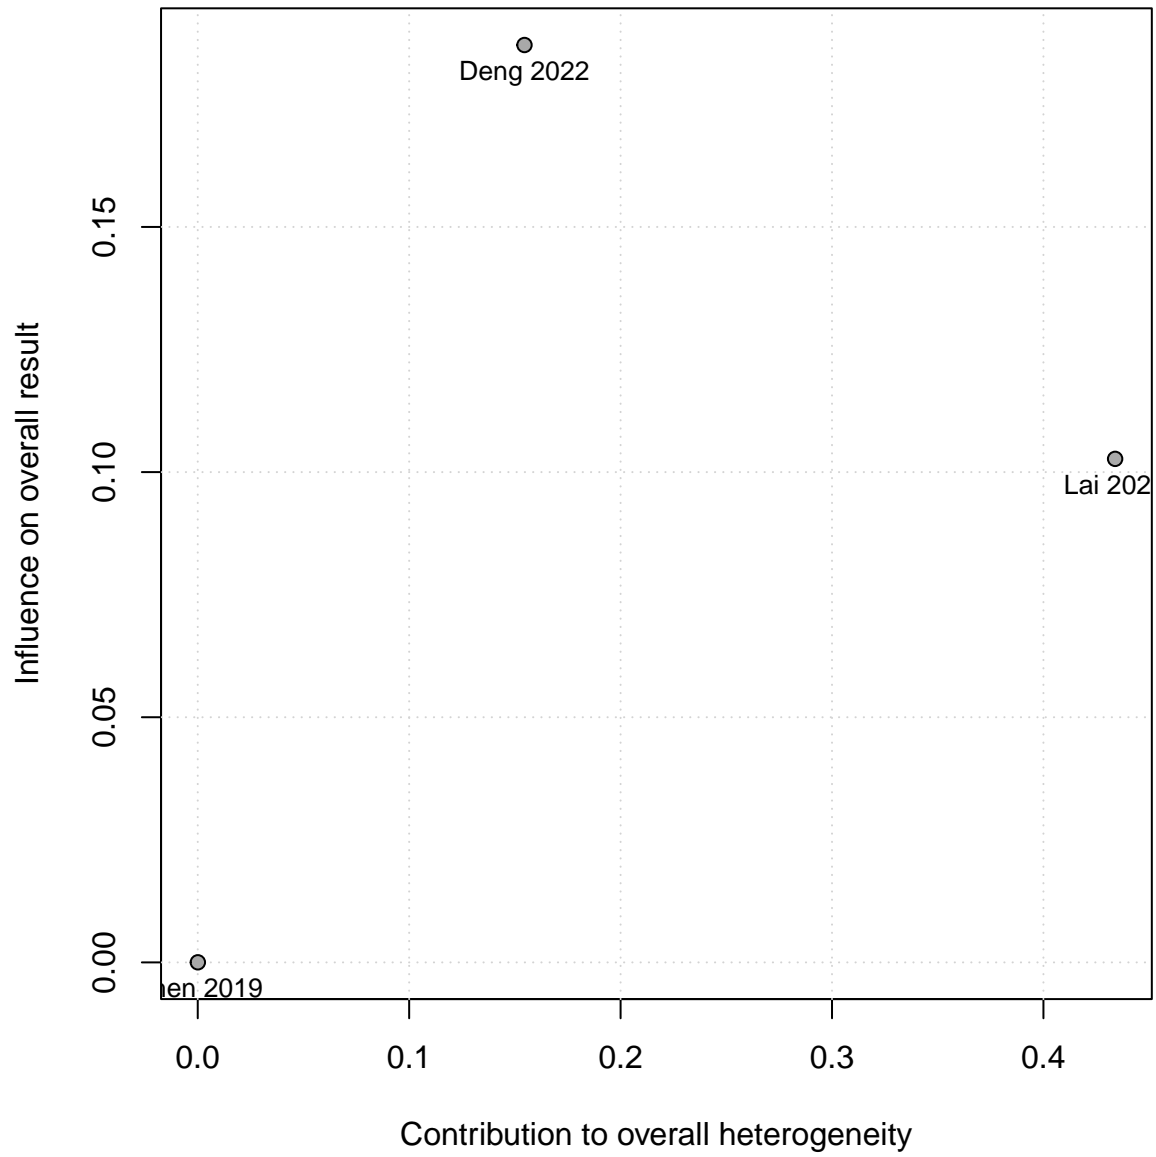



### 12.16.6 Leave one out

```
metainf(transfusion_metabin)
```

```
## Influential analysis (common effect model)
##
##           RR           95%-CI p-value  tau^2    tau    I^2
## Omitting Tang 2023  0.1445 [0.0280; 0.7467]  0.0210  0.0000  0.0000  0.0%
## Omitting Chen 2019  0.1439 [0.0199; 1.0412]  0.0549  0.0000  0.0000  0.0%
## Omitting Lai 2020   0.1035 [0.0134; 0.7992]  0.0296  0.0000  0.0000  0.0%
## Omitting Deng 2022  0.2270 [0.0294; 1.7540]  0.1552  0.0000  0.0000  0.0%
##
## Pooled estimate    0.1445 [0.0280; 0.7467]  0.0210  0.0000  0.0000  0.0%
##
## Details on meta-analytical method:
## - Mantel-Haenszel method
## - Restricted maximum-likelihood estimator for tau^2
```

## 12.17 Clavien I

### 12.17.1 Meta-analysis

```
clav_i_metabin <- metabin(data = minipcnl_only,
                          event.c = clavien_i_n_control,
                          n.c = sample_size_control,
                          event.e = clavien_i_n_suction,
                          n.e = sample_size_suction,
                          studlab = author_year)

clav_i_metabin

## Number of studies: k = 2
## Number of observations: o = 473
## Number of events: e = 26
##
##              RR          95%-CI      z p-value
## Common effect model 0.5950 [0.2749; 1.2876] -1.32 0.1874
## Random effects model 0.5930 [0.2731; 1.2874] -1.32 0.1864
##
## Quantifying heterogeneity:
## tau^2 = 0; tau = 0; I^2 = 0.0%; H = 1.00
##
## Test of heterogeneity:
##      Q d.f. p-value
## 0.22  1 0.6373
##
## Details on meta-analytical method:
## - Mantel-Haenszel method
## - Inverse variance method
## - Restricted maximum-likelihood estimator for tau^2
```

### 12.17.2 Forest plot

```
forest(clav_i_metabin,
       sortvar = TE)
```

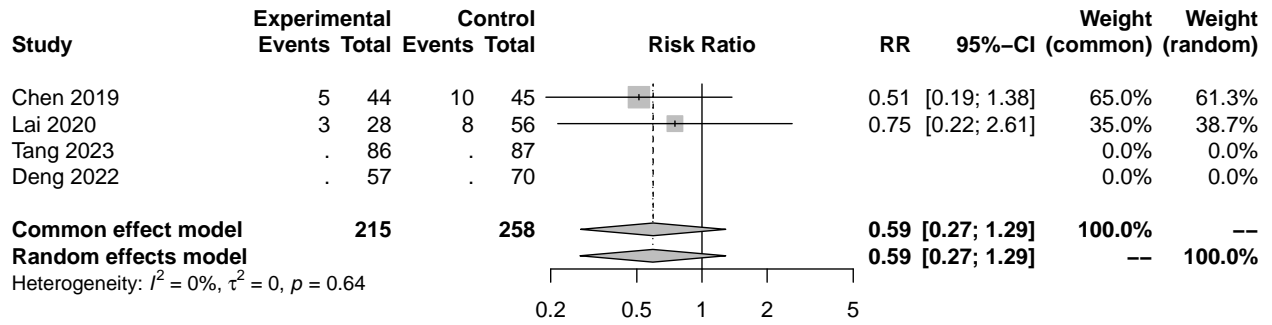

### 12.17.3 Trim and Fill

```
#trimfill(clav_i_metabin)  
#forest(trimfill(clav_i_metabin),  
#      sortvar = TE)
```

### 12.17.4 Funnel plot

```
funnel((clav_i_metabin))
```

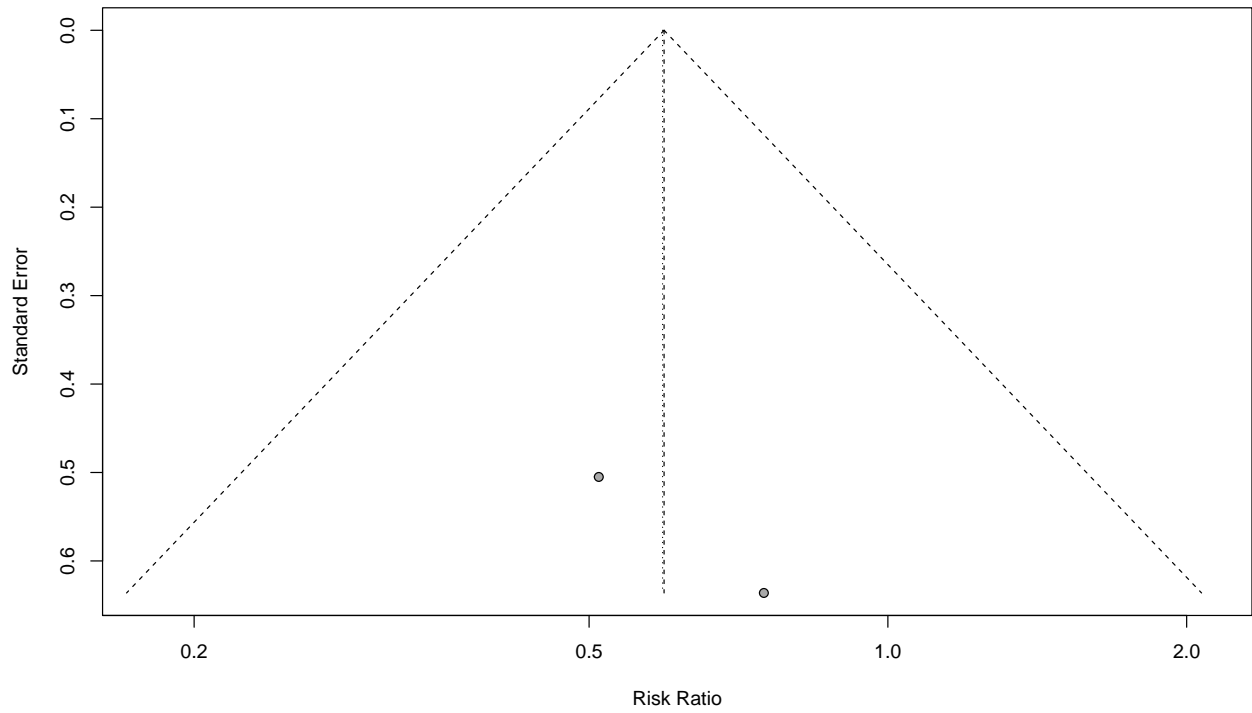

### 12.17.5 Baujat

```
baujat(clav_i_metabin, pos = 1)
```

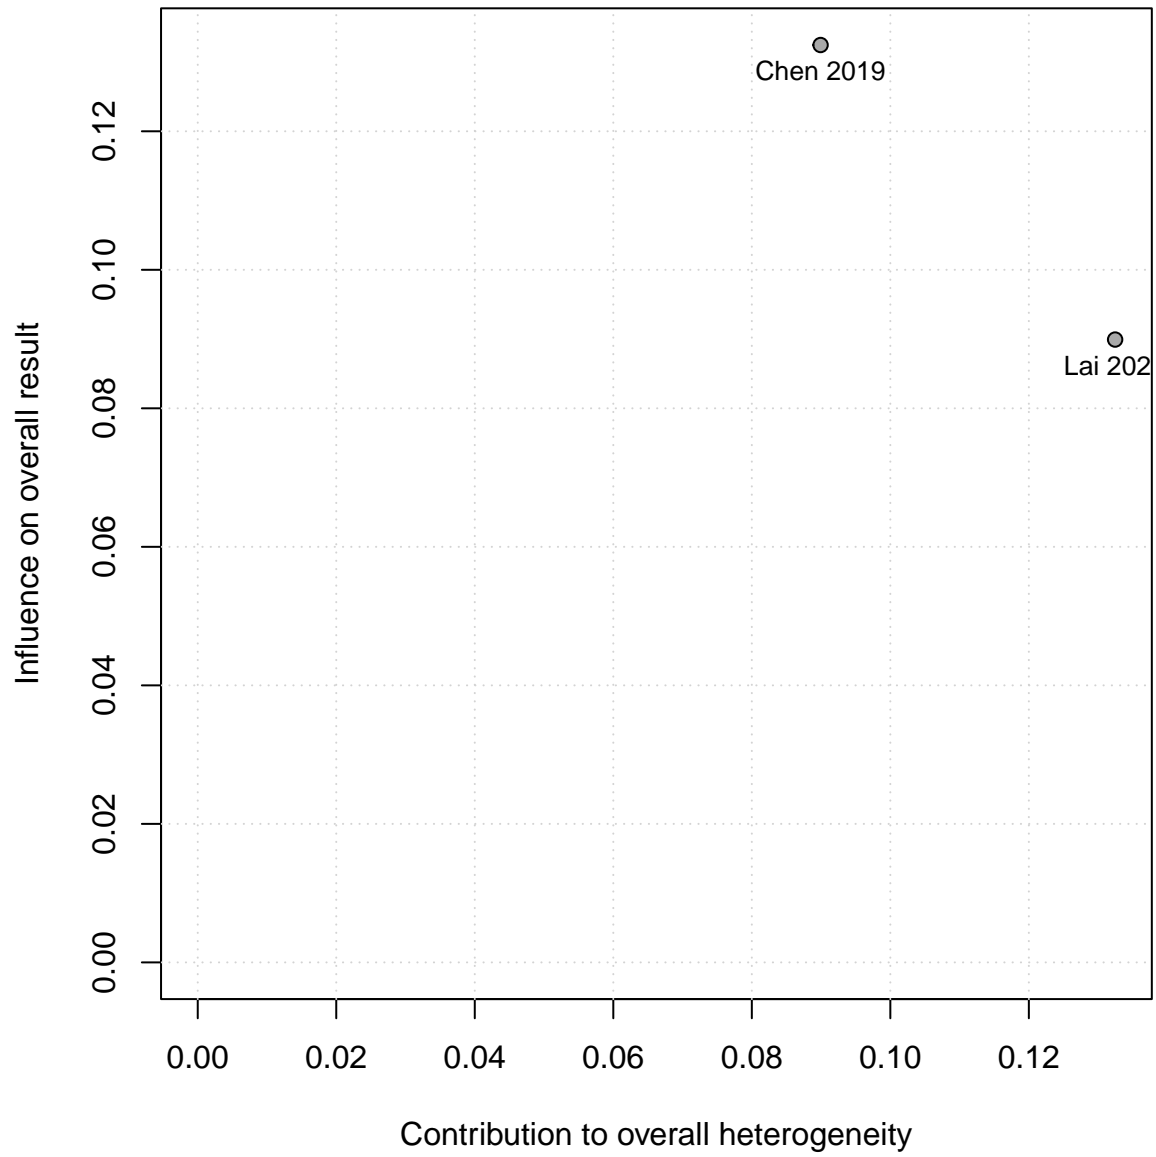

### 12.17.6 Leave one out

```
metainf(clav_i_metabin)
```

```
## Influential analysis (common effect model)
##
##           RR           95%-CI p-value  tau^2    tau    I^2
## Omitting Tang 2023  0.5950 [0.2749; 1.2876]  0.1874  0.0000  0.0000  0.0%
## Omitting Chen 2019  0.7500 [0.2155; 2.6098]  0.6511
## Omitting Lai 2020   0.5114 [0.1900; 1.3760]  0.1842
## Omitting Deng 2022  0.5950 [0.2749; 1.2876]  0.1874  0.0000  0.0000  0.0%
##
## Pooled estimate    0.5950 [0.2749; 1.2876]  0.1874  0.0000  0.0000  0.0%
##
## Details on meta-analytical method:
## - Mantel-Haenszel method
## - Restricted maximum-likelihood estimator for tau^2
```

## 12.18 Clavien II

### 12.18.1 Meta-analysis

```
clav_ii_metabin <- metabin(data = minipcnl_only,
                           event.c = clavien_ii_n_control,
                           n.c = sample_size_control,
                           event.e = clavien_ii_n_suction,
                           n.e = sample_size_suction,
                           studlab = author_year)

clav_ii_metabin

## Number of studies: k = 2
## Number of observations: o = 473
## Number of events: e = 8
##
##              RR          95%-CI      z p-value
## Common effect model 0.3001 [0.0565; 1.5932] -1.41 0.1576
## Random effects model 0.3258 [0.0577; 1.8397] -1.27 0.2042
##
## Quantifying heterogeneity:
## tau^2 = 0; tau = 0; I^2 = 0.0%; H = 1.00
##
## Test of heterogeneity:
##      Q d.f. p-value
## 0.44   1 0.5069
##
## Details on meta-analytical method:
## - Mantel-Haenszel method
## - Inverse variance method
## - Restricted maximum-likelihood estimator for tau^2
## - Continuity correction of 0.5 in studies with zero cell frequencies
```



### 12.18.2 Forest plot

```
forest(clav_ii_metabin,
       sortvar = TE)
```

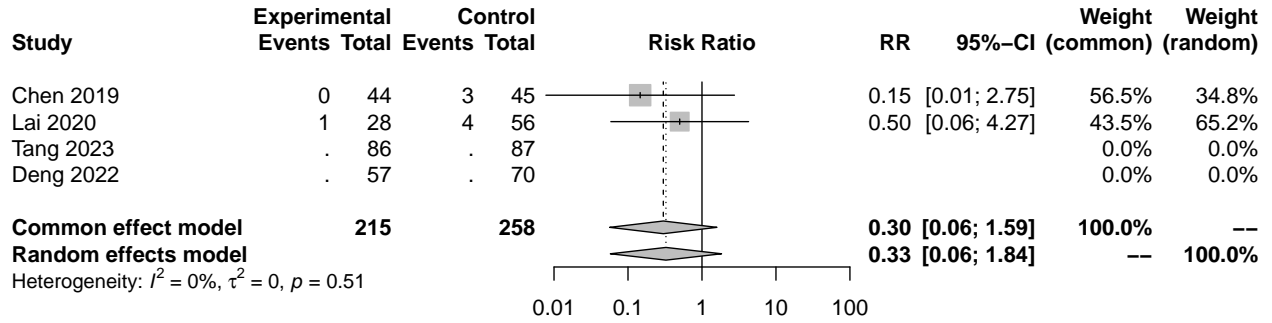

### 12.18.3 Trim and Fill

```
#trimfill(clav_ii_metabin)  
#forest(trimfill(clav_ii_metabin),  
#      sortvar = TE)
```

### 12.18.4 Funnel plot

```
funnel((clav_ii_metabin))
```

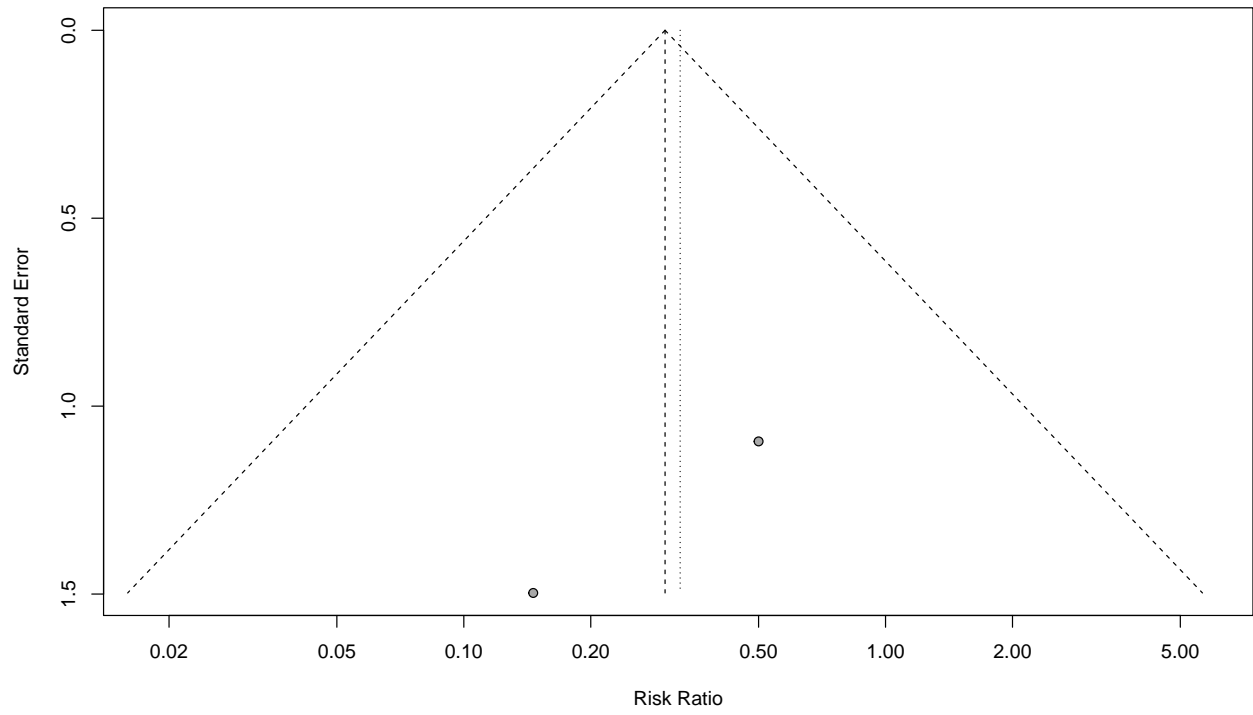

### 12.18.5 Baujat

```
baujat(clav_ii_metabin, pos = 1)
```

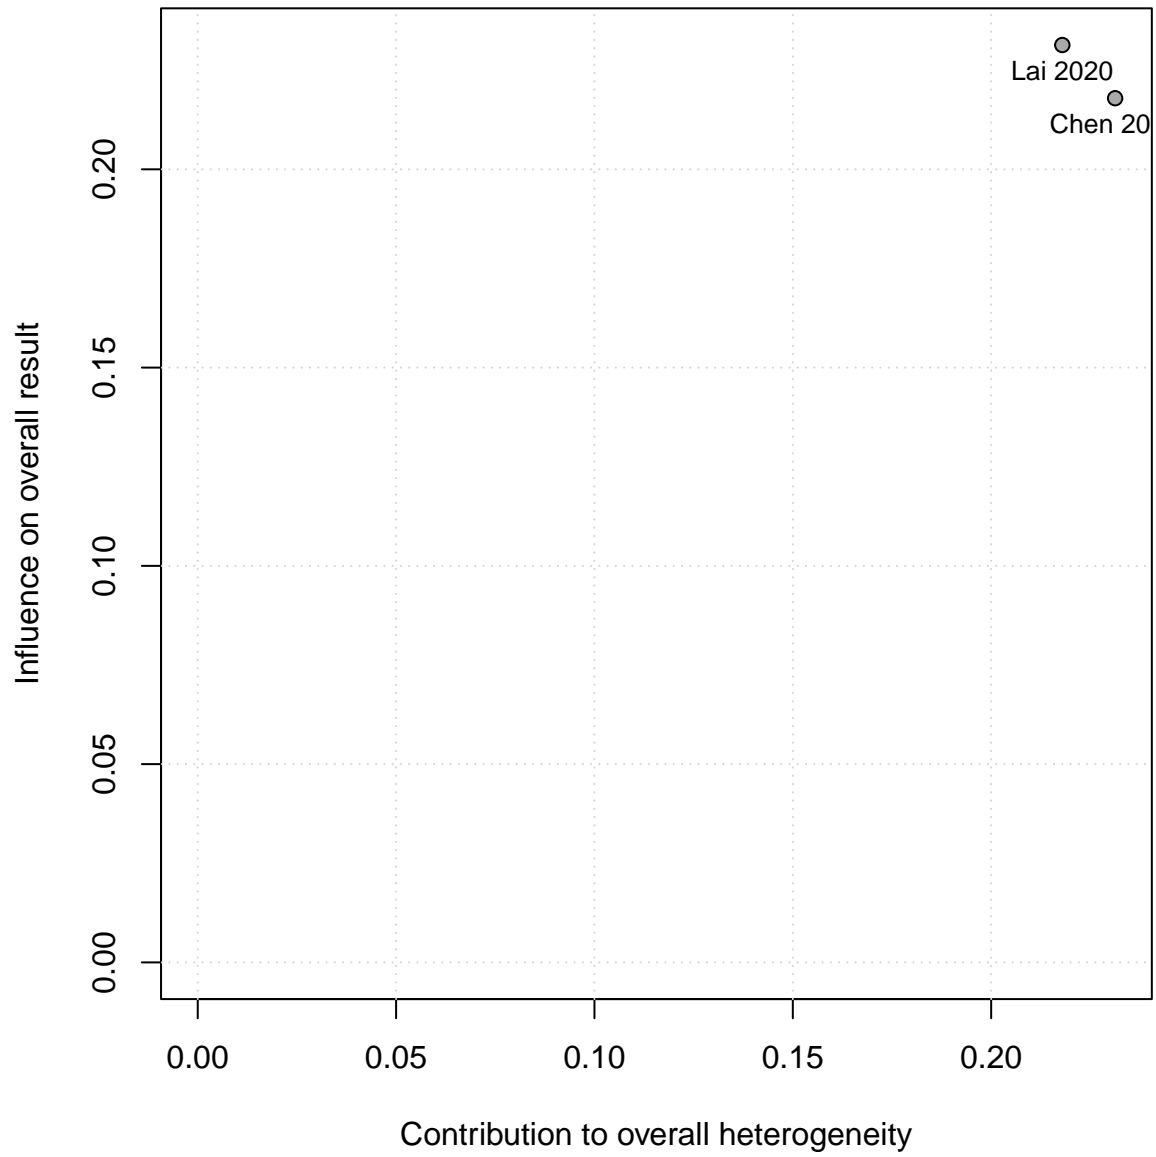

### 12.18.6 Leave one out

```
metainf(clav_ii_metabin)
```

```
## Influential analysis (common effect model)
##
##           RR           95%-CI p-value  tau^2    tau    I^2
## Omitting Tang 2023  0.3001 [0.0565; 1.5932]  0.1576  0.0000  0.0000  0.0%
## Omitting Chen 2019  0.5000 [0.0586; 4.2661]  0.5263
## Omitting Lai 2020   0.1460 [0.0078; 2.7473]  0.1988
## Omitting Deng 2022  0.3001 [0.0565; 1.5932]  0.1576  0.0000  0.0000  0.0%
##
## Pooled estimate    0.3001 [0.0565; 1.5932]  0.1576  0.0000  0.0000  0.0%
##
## Details on meta-analytical method:
## - Mantel-Haenszel method
## - Restricted maximum-likelihood estimator for tau^2
```

## 12.19 Clavien III

### 12.19.1 Meta-analysis

```
clav_iii_metabin <- metabin(data = minipcni_only,
                             event.c = clavien_iii_n_control,
                             n.c = sample_size_control,
                             event.e = clavien_iii_n_suction,
                             n.e = sample_size_suction,
                             studlab = author_year)

clav_iii_metabin

## Number of studies: k = 2
## Number of observations: o = 473
## Number of events: e = 4
##
##              RR          95%-CI      z p-value
## Common effect model 0.6528 [0.1042; 4.0882] -0.46 0.6487
## Random effects model 0.6820 [0.1028; 4.5254] -0.40 0.6919
##
## Quantifying heterogeneity:
## tau^2 = 0; tau = 0; I^2 = 0.0%; H = 1.00
##
## Test of heterogeneity:
##      Q d.f. p-value
## 0.28  1 0.5936
##
## Details on meta-analytical method:
## - Mantel-Haenszel method
## - Inverse variance method
## - Restricted maximum-likelihood estimator for tau^2
## - Continuity correction of 0.5 in studies with zero cell frequencies
```

### 12.19.2 Forest plot

```
forest(clav_iii_metabin,
       sortvar = TE)
```

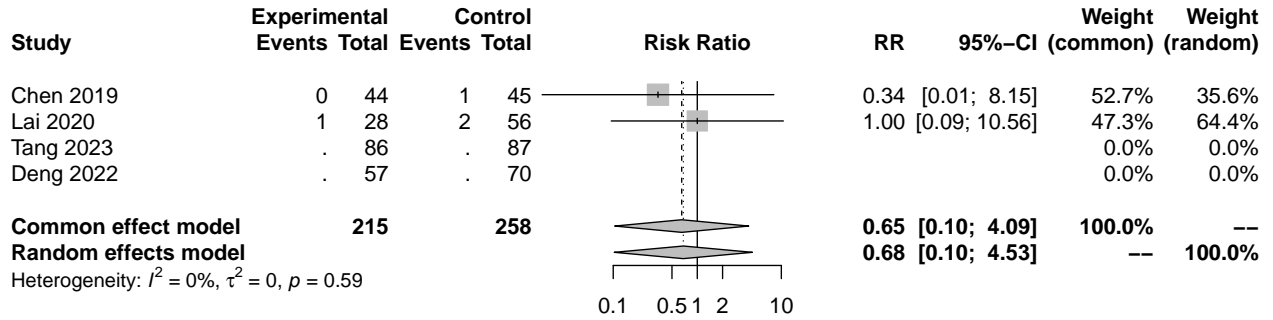

### 12.19.3 Trim and Fill

```
#trimfill(clav_iii_metabin)  
#forest(trimfill(clav_iii_metabin),  
#      sortvar = TE)
```



### 12.19.4 Funnel plot

```
funnel((clav_iii_metabin))
```

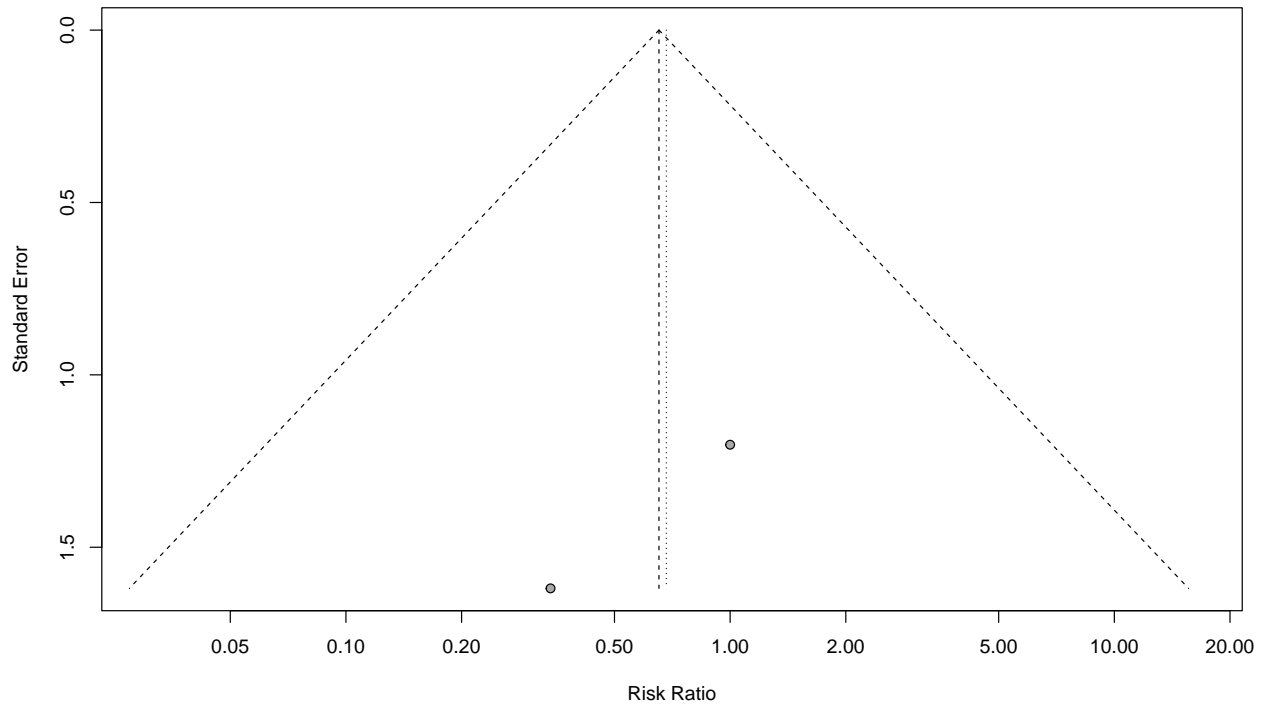

### 12.19.5 Baujat

```
baujat(clav_iii_metabin, pos = 1)
```

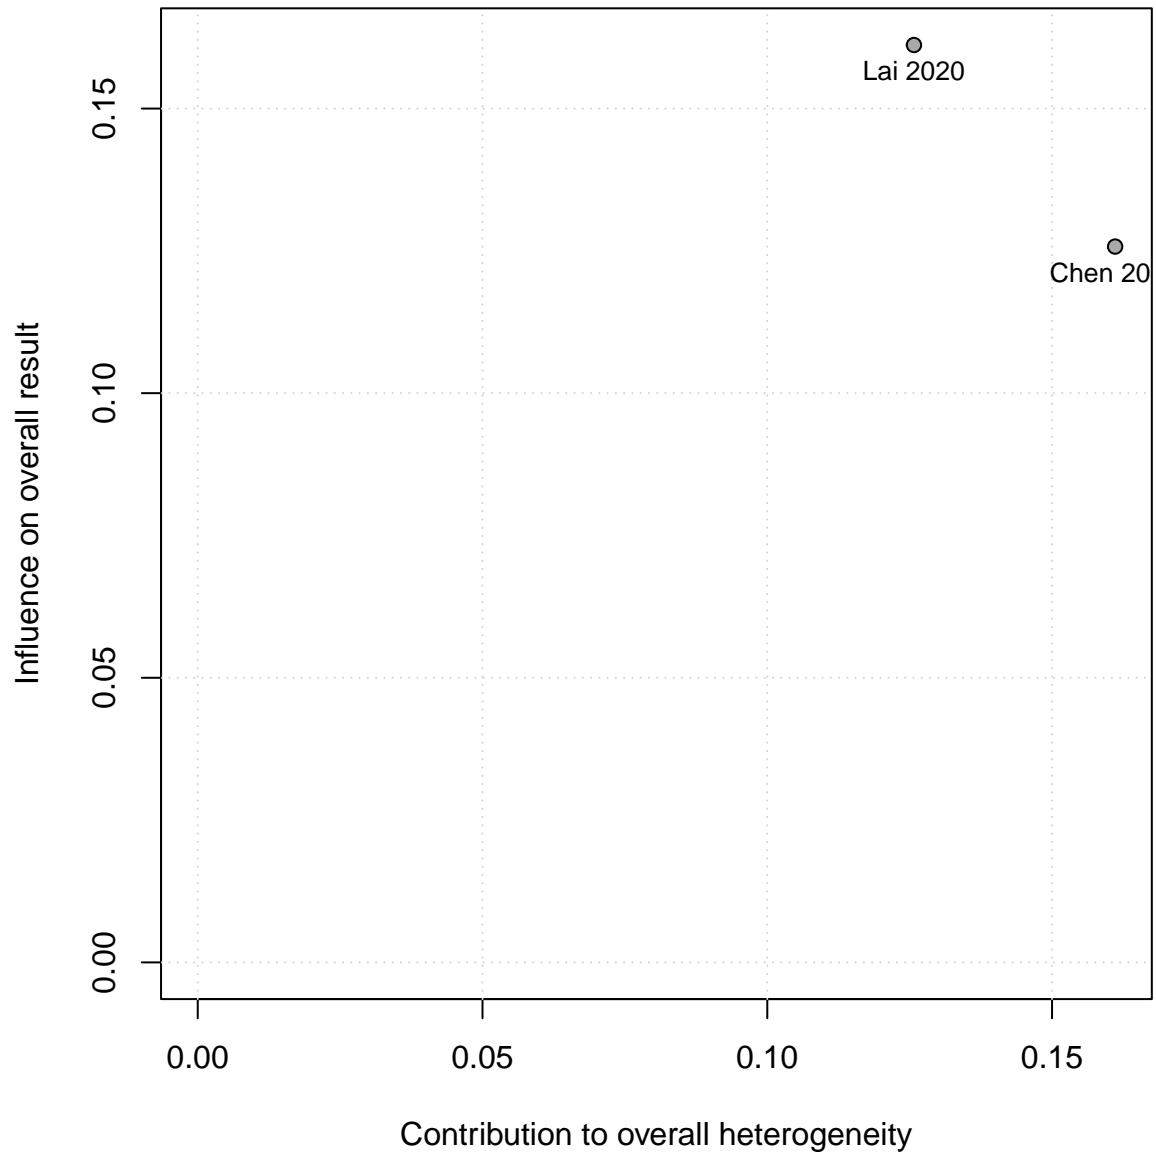

### 12.19.6 Leave one out

```
metainf(clav_iii_metabin)
```

```
## Influential analysis (common effect model)
##
##           RR           95%-CI p-value  tau^2    tau    I^2
## Omitting Tang 2023  0.6528 [0.1042;  4.0882]  0.6487  0.0000  0.0000  0.0%
## Omitting Chen 2019  1.0000 [0.0947; 10.5613]  1.0000
## Omitting Lai 2020   0.3407 [0.0143;  8.1456]  0.5062
## Omitting Deng 2022  0.6528 [0.1042;  4.0882]  0.6487  0.0000  0.0000  0.0%
##
## Pooled estimate    0.6528 [0.1042;  4.0882]  0.6487  0.0000  0.0000  0.0%
##
## Details on meta-analytical method:
## - Mantel-Haenszel method
## - Restricted maximum-likelihood estimator for tau^2
```

## 12.20 Clavien IV

### 12.20.1 Meta-analysis

```
clav_iv_metabin <- metabin(data = minipcnl_only,
                          event.c = clavien_iv_n_control,
                          n.c = sample_size_control,
                          event.e = clavien_iv_n_suction,
                          n.e = sample_size_suction,
                          studlab = author_year)

clav_iv_metabin
```

```
## Number of studies: k = 0
## Number of observations: o = 473
## Number of events: e = 0
##
##                RR 95%-CI  z p-value
## Common effect model  NA      --      --
## Random effects model NA      --      --
##
## Quantifying heterogeneity:
## tau^2 = NA; tau = NA; I^2 = NA; H = NA
##
## Details on meta-analytical method:
## - Mantel-Haenszel method
## - Inverse variance method
## - Restricted maximum-likelihood estimator for tau^2
```

### 12.20.2 Forest plot

```
forest(clav_iv_metabin,
       sortvar = TE)
```

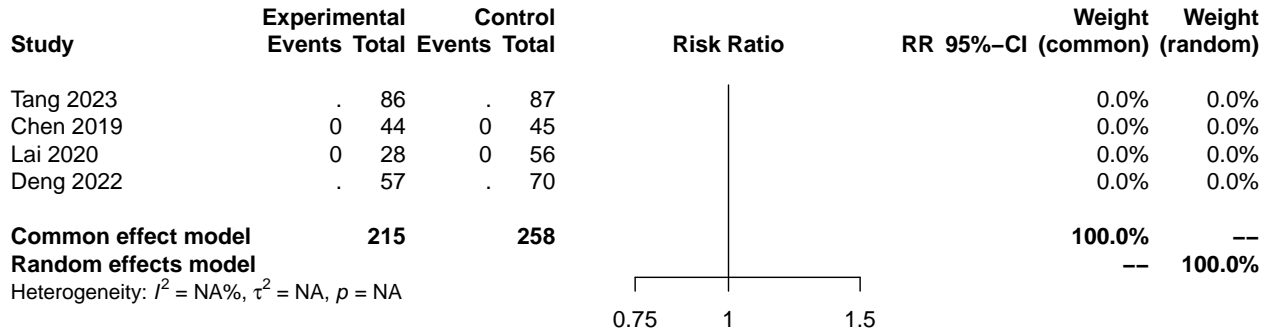

### 12.20.3 Trim and Fill

```
#trimfill(clav_iv_metabin)  
#forest(trimfill(clav_iv_metabin),  
#      sortvar = TE)
```

#### 12.20.4 Funnel plot

```
#funnel((clav_iv_metabin))
```

### 12.20.5 Baujat

```
#baujat(clav_iv_metabin, pos = 1)
```



### 12.20.6 Leave one out

```
#metainf(clav_iv_metabin)
```

## 12.21 Clavien V

### 12.21.1 Meta-analysis

```
clav_v_metabin <- metabin(data = minipcnl_only,
                          event.c = clavien_v_n_control,
                          n.c = sample_size_control,
                          event.e = clavien_v_n_suction,
                          n.e = sample_size_suction,
                          studlab = author_year)

clav_v_metabin
```

```
## Number of studies: k = 0
## Number of observations: o = 473
## Number of events: e = 0
##
##                RR 95%-CI  z p-value
## Common effect model  NA      --      --
## Random effects model NA      --      --
##
## Quantifying heterogeneity:
## tau^2 = NA; tau = NA; I^2 = NA; H = NA
##
## Details on meta-analytical method:
## - Mantel-Haenszel method
## - Inverse variance method
## - Restricted maximum-likelihood estimator for tau^2
```

### 12.21.2 Forest plot

```
#forest(clav_v_metabin,  
#       sortvar = TE)
```

### 12.21.3 Trim and Fill

```
#trimfill(clav_v_metabin)  
#forest(trimfill(clav_v_metabin),  
#      sortvar = TE)
```

#### 12.21.4 Funnel plot

```
#funnel(trimfill(clav_v_metabin))
```

### 12.21.5 Baujat

```
#baujat(clav_v_metabin, pos = 1)
```

### 12.21.6 Leave one out

```
#metainf(clav_v_metabin)
```

## 12.22 Clavien I-II

### 12.22.1 Meta-analysis

```
clav_i_ii_metabin <- metabin(data = minipcni_only,
                             event.c = clav_i_ii_n_control,
                             n.c = sample_size_control,
                             event.e = clav_i_ii_n_suction,
                             n.e = sample_size_suction,
                             studlab = author_year)

clav_i_ii_metabin

## Number of studies: k = 2
## Number of observations: o = 473
## Number of events: e = 34
##
##              RR          95%-CI      z p-value
## Common effect model 0.4982 [0.2494; 0.9953] -1.97 0.0485
## Random effects model 0.4996 [0.2486; 1.0041] -1.95 0.0514
##
## Quantifying heterogeneity:
## tau^2 = 0; tau = 0; I^2 = 0.0%; H = 1.00
##
## Test of heterogeneity:
##      Q d.f. p-value
## 0.54   1 0.4608
##
## Details on meta-analytical method:
## - Mantel-Haenszel method
## - Inverse variance method
## - Restricted maximum-likelihood estimator for tau^2
```



### 12.22.2 Forest plot

```
forest(clav_i_ii_metabin,
       sortvar = TE)
```

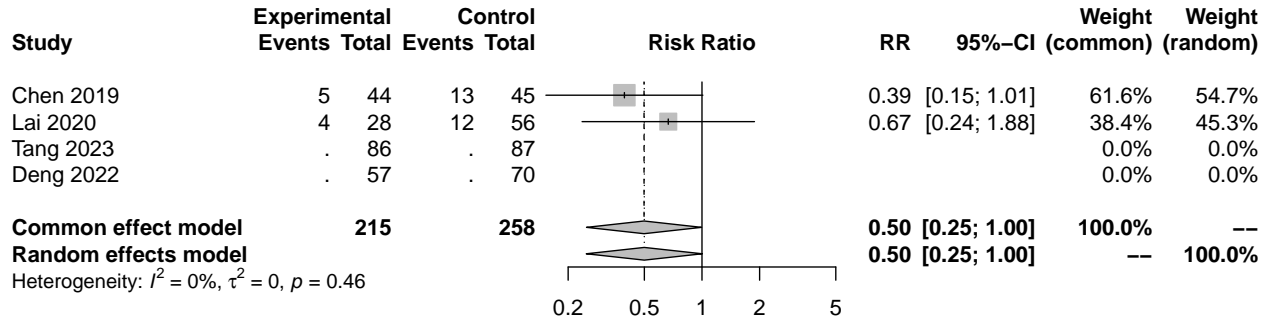

### 12.22.3 Trim and Fill

```
#trimfill(clav_i_ii_metabin)  
#forest(trimfill(clav_i_ii_metabin),  
#      sortvar = TE)
```

## 12.22.4 Funnel plot

```
funnel((clav_i_ii_metabin))
```

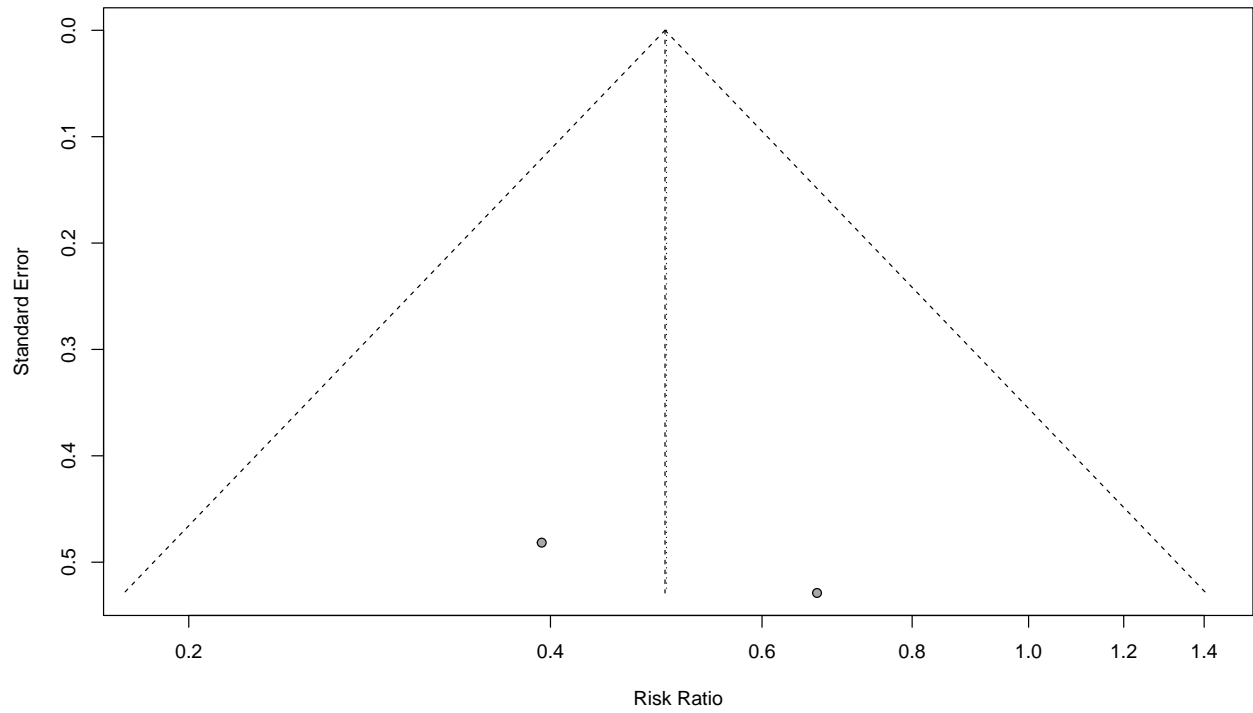

### 12.22.5 Baujat

```
baujat(clav_i_ii_metabin, pos = 1)
```

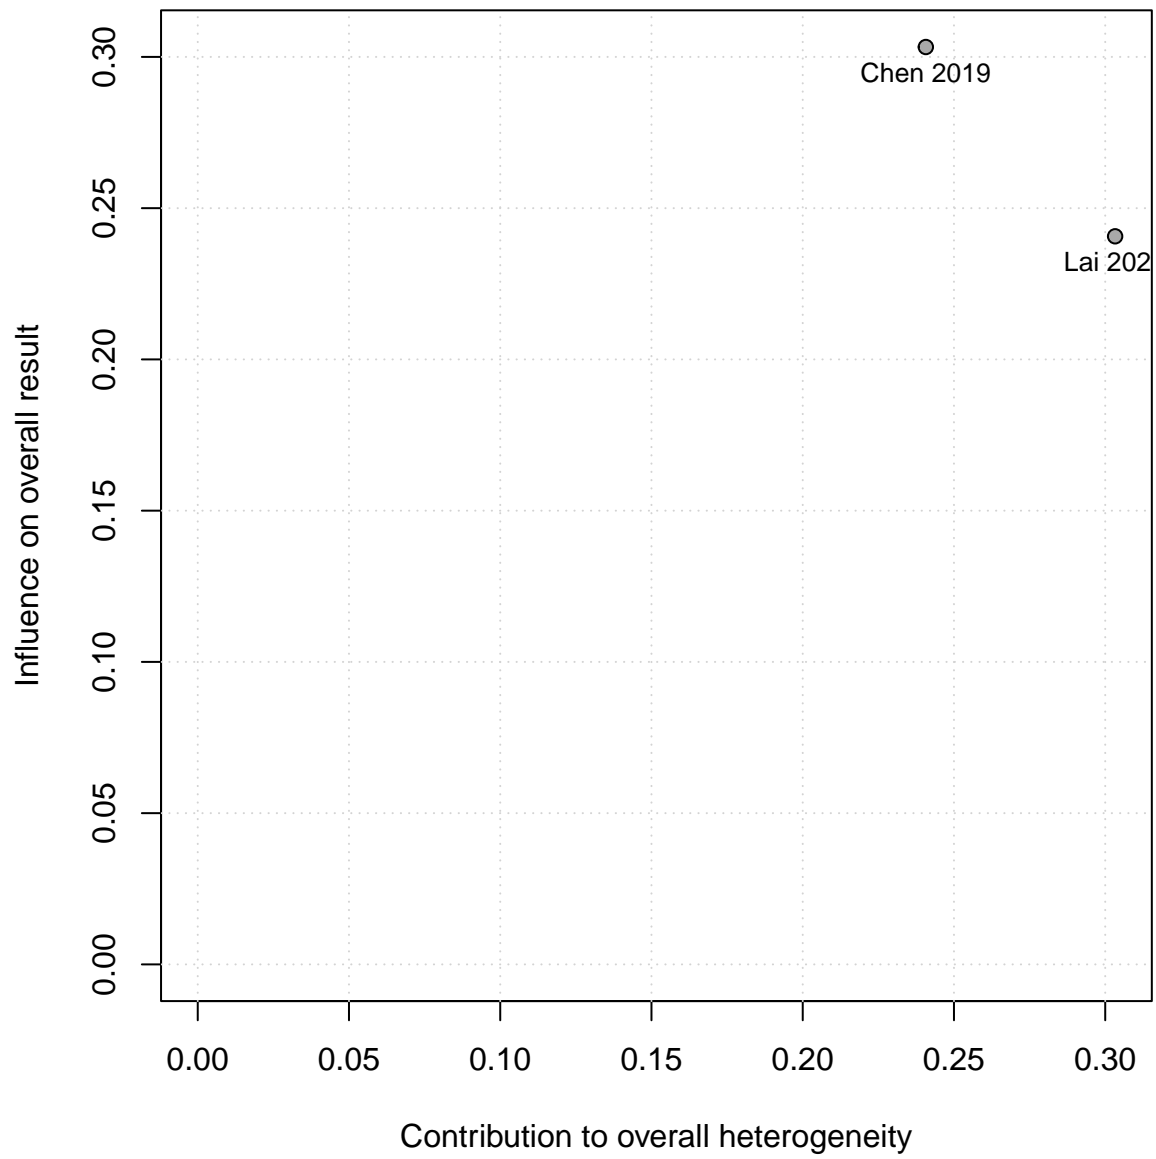

### 12.22.6 Leave one out

```
metainf(clav_i_ii_metabin)
```

```
## Influential analysis (common effect model)
##
##           RR           95%-CI p-value  tau^2    tau    I^2
## Omitting Tang 2023  0.4982 [0.2494; 0.9953]  0.0485  0.0000  0.0000  0.0%
## Omitting Chen 2019  0.6667 [0.2364; 1.8799]  0.4433
## Omitting Lai 2020   0.3934 [0.1530; 1.0110]  0.0527
## Omitting Deng 2022  0.4982 [0.2494; 0.9953]  0.0485  0.0000  0.0000  0.0%
##
## Pooled estimate    0.4982 [0.2494; 0.9953]  0.0485  0.0000  0.0000  0.0%
##
## Details on meta-analytical method:
## - Mantel-Haenszel method
## - Restricted maximum-likelihood estimator for tau^2
```

## 12.23 Clavien III-V

### 12.23.1 Meta-analysis

```
clav_iii_v_metabin <- metabin(data = minipcnl_only,
                             event.c = clav_iii_v_n_control,
                             n.c = sample_size_control,
                             event.e = clav_iii_v_n_suction,
                             n.e = sample_size_suction,
                             studlab = author_year)

clav_iii_v_metabin

## Number of studies: k = 2
## Number of observations: o = 473
## Number of events: e = 4
##
##              RR          95%-CI      z p-value
## Common effect model 0.6528 [0.1042; 4.0882] -0.46 0.6487
## Random effects model 0.6820 [0.1028; 4.5254] -0.40 0.6919
##
## Quantifying heterogeneity:
## tau^2 = 0; tau = 0; I^2 = 0.0%; H = 1.00
##
## Test of heterogeneity:
##      Q d.f. p-value
## 0.28  1 0.5936
##
## Details on meta-analytical method:
## - Mantel-Haenszel method
## - Inverse variance method
## - Restricted maximum-likelihood estimator for tau^2
## - Continuity correction of 0.5 in studies with zero cell frequencies
```

### 12.23.2 Forest plot

```
forest(clav_iii_v_metabin,
       sortvar = TE)
```



### 12.23.3 Trim and Fill

```
#trimfill(clav_iii_v_metabin)  
#forest(trimfill(clav_iii_v_metabin),  
#      sortvar = TE)
```



### 12.23.4 Funnel plot

```
funnel((clav_iii_v_metabin))
```



### 12.23.5 Baujat

```
baujat(clav_iii_v_metabin, pos = 1)
```



### 12.23.6 Leave one out

```
metainf(clav_iii_v_metabin)
```

```
## Influential analysis (common effect model)
##
##           RR           95%-CI p-value  tau^2    tau    I^2
## Omitting Tang 2023  0.6528 [0.1042;  4.0882]  0.6487  0.0000  0.0000  0.0%
## Omitting Chen 2019  1.0000 [0.0947; 10.5613]  1.0000
## Omitting Lai 2020   0.3407 [0.0143;  8.1456]  0.5062
## Omitting Deng 2022  0.6528 [0.1042;  4.0882]  0.6487  0.0000  0.0000  0.0%
##
## Pooled estimate    0.6528 [0.1042;  4.0882]  0.6487  0.0000  0.0000  0.0%
##
## Details on meta-analytical method:
## - Mantel-Haenszel method
## - Restricted maximum-likelihood estimator for tau^2
```



```

    sfr_metabin$k,
    aux_rx_metabin$k,
    comp_metabin$k,
    fever_metabin$k,
    infection_metabin$k,
    sepsis_metabin$k,
    abscess_metabin$k,
    haematoma_metabin$k,
    pain_metabin$k,
    stricture_metabin$k,
    ir_embolisation_metabin$k,
    transfusion_metabin$k,
    clav_i_metabin$k,
    clav_ii_metabin$k,
    clav_iii_metabin$k,
    clav_iv_metabin$k,
    clav_i_ii_metabin$k,
    clav_iii_v_metabin$k,
    or_time_metacont$k,
    vas_metacont$k,
    los_metacont$k),
"es" = c(
  immediate_sfr_metabin$TE.random %>% exp(),
  sfr_metabin$TE.random %>% exp(),
  aux_rx_metabin$TE.random %>% exp(),
  comp_metabin$TE.random %>% exp(),
  fever_metabin$TE.random %>% exp(),
  infection_metabin$TE.random %>% exp(),
  sepsis_metabin$TE.random %>% exp(),
  abscess_metabin$TE.random %>% exp(),
  haematoma_metabin$TE.random %>% exp(),
  pain_metabin$TE.random %>% exp(),
  stricture_metabin$TE.random %>% exp(),
  ir_embolisation_metabin$TE.random %>% exp(),
  transfusion_metabin$TE.random %>% exp(),
  clav_i_metabin$TE.random %>% exp(),
  clav_ii_metabin$TE.random %>% exp(),
  clav_iii_metabin$TE.random %>% exp(),
  clav_iv_metabin$TE.random %>% exp(),
  clav_i_ii_metabin$TE.random %>% exp(),
  clav_iii_v_metabin$TE.random %>% exp(),
  or_time_metacont$TE.random,
  vas_metacont$TE.random,
  los_metacont$TE.random),
"lower_ci" = c(
  immediate_sfr_metabin$lower.random %>% exp(),
  sfr_metabin$lower.random %>% exp(),
  aux_rx_metabin$lower.random %>% exp(),
  comp_metabin$lower.random %>% exp(),
  fever_metabin$lower.random %>% exp(),
  infection_metabin$lower.random %>% exp(),
  sepsis_metabin$lower.random %>% exp(),
  abscess_metabin$lower.random %>% exp(),

```

```

haematoma_metabin$lower.random %>% exp(),
pain_metabin$lower.random %>% exp(),
stricture_metabin$lower.random %>% exp(),
ir_embolisation_metabin$lower.random %>% exp(),
transfusion_metabin$lower.random %>% exp(),
clav_i_metabin$lower.random %>% exp(),
clav_ii_metabin$lower.random %>% exp(),
clav_iii_metabin$lower.random %>% exp(),
clav_iv_metabin$lower.random %>% exp(),
clav_i_ii_metabin$lower.random %>% exp(),
clav_iii_v_metabin$lower.random %>% exp(),
or_time_metacont$lower.random,
vas_metacont$lower.random,
los_metacont$lower.random),
"upper_ci" = c(immediate_sfr_metabin$upper.random %>% exp(),
               sfr_metabin$upper.random %>% exp(),
               aux_rx_metabin$upper.random %>% exp(),
               comp_metabin$upper.random %>% exp(),
               fever_metabin$upper.random %>% exp(),
               infection_metabin$upper.random %>% exp(),
               sepsis_metabin$upper.random %>% exp(),
               abscess_metabin$upper.random %>% exp(),
               haematoma_metabin$upper.random %>% exp(),
               pain_metabin$upper.random %>% exp(),
               stricture_metabin$upper.random %>% exp(),
               ir_embolisation_metabin$upper.random %>% exp(),
               transfusion_metabin$upper.random %>% exp(),
               clav_i_metabin$upper.random %>% exp(),
               clav_ii_metabin$upper.random %>% exp(),
               clav_iii_metabin$upper.random %>% exp(),
               clav_iv_metabin$upper.random %>% exp(),
               clav_i_ii_metabin$upper.random %>% exp(),
               clav_iii_v_metabin$upper.random %>% exp(),
               or_time_metacont$upper.random,
               vas_metacont$upper.random,
               los_metacont$upper.random),
"p" = c(
  immediate_sfr_metabin$pval.random,
  sfr_metabin$pval.random,
  aux_rx_metabin$pval.random,
  comp_metabin$pval.random,
  fever_metabin$pval.random,
  infection_metabin$pval.random,
  sepsis_metabin$pval.random,
  abscess_metabin$pval.random,
  haematoma_metabin$pval.random,
  pain_metabin$pval.random,
  stricture_metabin$pval.random,
  ir_embolisation_metabin$pval.random,
  transfusion_metabin$pval.random,
  clav_i_metabin$pval.random,
  clav_ii_metabin$pval.random,
  clav_iii_metabin$pval.random,

```

```

clav_iv_metabin$pval.random,
clav_i_ii_metabin$pval.random,
clav_iii_v_metabin$pval.random,
or_time_metacont$pval.random,
vas_metacont$pval.random,
los_metacont$pval.random)) %>% as_tibble() %>% drop_na(es)

overall$es <- as.numeric(overall$es)
overall$es <- round(overall$es, digits = 2)

overall$lower_ci <- as.numeric(overall$lower_ci)
overall$lower_ci <- round(overall$lower_ci, digits = 2)

overall$upper_ci <- as.numeric(overall$upper_ci)
overall$upper_ci <- round(overall$upper_ci, digits = 2)

overall$p <- as.numeric(overall$p)
overall$p <- round(overall$p, digits = 2)
overall$p <- ifelse(overall$p<0.001, "<0.001", overall$p)

```

### 13.1 Summary Table of number of studies for each outcome included in meta-analysis

```
overall %>% subset(select = c(Outcome, n_studies)) %>% gt() %>% tab_header(title = "Summary table of Nu
```

Summary table of Number of Studies for Each Outcome Meta-Analysis

| Outcome               | Studies, n |
|-----------------------|------------|
| Immediate SFR         | 9          |
| Final SFR             | 4          |
| Auxiliary Treatment   | 2          |
| Overall Complications | 4          |
| Fever                 | 4          |
| Infection             | 4          |
| Sepsis                | 1          |
| Haematoma             | 1          |
| Pain                  | 2          |
| Embolisation          | 2          |
| Transfusion           | 3          |
| CD I                  | 2          |
| CD II                 | 2          |
| CD III                | 2          |
| CD I-II               | 2          |
| CD III-V              | 2          |
| Operative time        | 4          |
| VAS                   | 1          |
| Length of Stay        | 3          |



## 13.2 Summary Forest plot of Continuous outcomes

### 13.2.1 Continuous Outcomes Table

md = mean difference lb = lower bound of 95% confidence interval ub = upper bound of 95% confidence interval tf = trim and fill

```
overall_continuous <-  
  overall %>% subset(type == "cont") %>% subset(select = c(Outcome,  
                                                         n_studies,  
                                                         es,  
                                                         lower_ci,  
                                                         upper_ci,  
                                                         p)) %>% as_tibble()  
overall_continuous %>% gt() %>% tab_header(title = "Summary Table for Continuous Outcomes") %>% cols_me
```

Summary Table for Continuous Outcomes

| Outcome        | Studies, n | MD (95% CI)        | p      |
|----------------|------------|--------------------|--------|
| Operative time | 4          | 8.15 (0.05-16.25)  | 0.05   |
| VAS            | 1          | -2.10 (-2.66-1.54) | <0.001 |
| Length of Stay | 3          | -2.89 (-3.55-2.23) | <0.001 |

### 13.2.2 Continuous Forest plot

```

continuous_plot <- overall_continuous %>%
  forestplot(
    mean = es,
    lower = lower_ci,
    upper = upper_ci,
    labeltext = c(Outcome, n_studies, es, lower_ci, upper_ci, p),
    zero = 0,
    vertices = TRUE,
    title = "A. Forest plot of MA Outcomes for Continuous Outcomes",
    clip = c(-4, 2),
    xlab = "MD [95% CI]",
    graph.pos = 3
  ) %>% fp_set_style(
    box = c("black"),
    line = "black",
    txt_gp = fpTxtGp(
      ticks = gpar(fontfamily = "", cex = 1),
      xlab = gpar(fontfamily = "", cex = 1)
    )
  ) %>% fp_add_lines("steelblue") %>%
  fp_add_header("Outcome",
    "Studies, n",
    "MD",
    "[ 95%", " CI ]",
    "P-Value") %>% fp_decorate_graph(box = TRUE) %>% fp_set_zebra_style("#EFEFEF")
continuous_plot

```

**A. Forest plot of MA Outcomes for Continuous Outcomes**

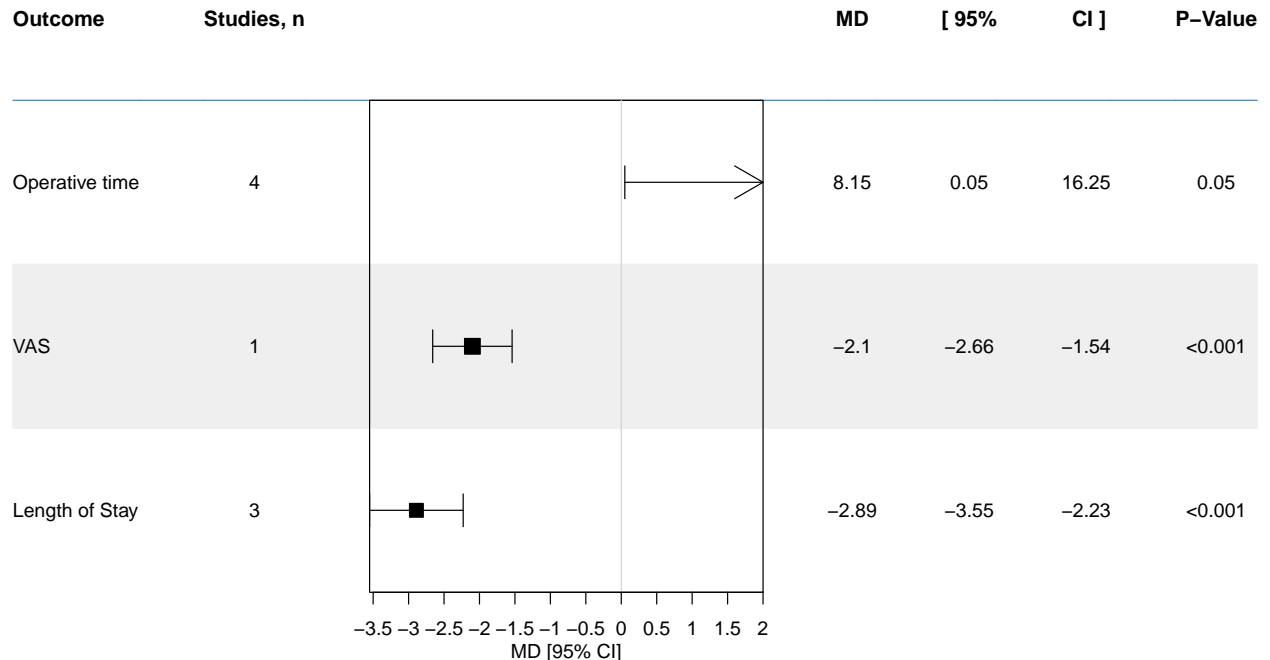

### 13.3 Summary Forest plot of Binary outcomes

### 13.3.1 Binary Outcomes Table

md = mean difference lb = lower bound of 95% confidence interval ub = upper bound of 95% confidence interval tf = trim and fill

```
overall_binary <-
  overall %>% subset(type == "binary") %>% subset(select = c(Outcome,
                                                             n_studies,
                                                             es,
                                                             lower_ci,
                                                             upper_ci,
                                                             p)) %>% as_tibble()
overall_binary %>% gt() %>% tab_header(title = "Summary Table for Binary Outcomes") %>% cols_merge(colum
```

Summary Table for Binary Outcomes

| Outcome               | Studies, n | RR (95% CI)      | p      |
|-----------------------|------------|------------------|--------|
| Immediate SFR         | 9          | 1.15 (0.99-1.34) | 0.08   |
| Final SFR             | 4          | 0.97 (0.92-1.02) | 0.2    |
| Auxiliary Treatment   | 2          | 1.77 (1.00-3.12) | 0.05   |
| Overall Complications | 4          | 0.42 (0.21-0.81) | 0.01   |
| Fever                 | 4          | 0.70 (0.35-1.41) | 0.32   |
| Infection             | 4          | 0.70 (0.32-1.54) | 0.37   |
| Sepsis                | 1          | 0.11 (0.01-2.06) | 0.14   |
| Haematoma             | 1          | 0.41 (0.02-9.84) | 0.58   |
| Pain                  | 2          | 0.21 (0.07-0.60) | <0.001 |
| Embolisation          | 2          | 0.29 (0.03-2.55) | 0.26   |
| Transfusion           | 3          | 0.16 (0.03-0.88) | 0.04   |
| CD I                  | 2          | 0.59 (0.27-1.29) | 0.19   |
| CD II                 | 2          | 0.33 (0.06-1.84) | 0.2    |
| CD III                | 2          | 0.68 (0.10-4.53) | 0.69   |
| CD I-II               | 2          | 0.50 (0.25-1.00) | 0.05   |
| CD III-V              | 2          | 0.68 (0.10-4.53) | 0.69   |

### 13.3.2 Binary Forest plot - Meta-Analysis

Reference = No Suction

```
binary_plot <- overall_binary %>%
  forestplot(
    mean = es,
    lower = lower_ci,
    upper = upper_ci,
    labeltext = c(Outcome, n_studies, es, lower_ci, upper_ci, p),
    zero = 1,
    vertices = TRUE,
    title = "A. Forest plot of MA Outcomes for Binary Outcomes",
    clip = c(-1.5, 1.5),
    xlab = "RR [95% CI]",
    graph.pos = 3
  ) %>% fp_set_style(
    box = c("black"),
    line = "black",
    txt_gp = fpTxtGp(
      ticks = gpar(fontfamily = "", cex = 1),
      xlab = gpar(fontfamily = "", cex = 1)
    )
  ) %>% fp_add_lines("steelblue") %>%
  fp_add_header("Outcome",
    "Studies, n",
    "RR",
    "[ 95%", " CI ]",
    "P-Value") %>% fp_decorate_graph(box = TRUE) %>% fp_set_zebra_style("#EFEFEF")
binary_plot
```

A. Forest plot of MA Outcomes for Binary Outcomes

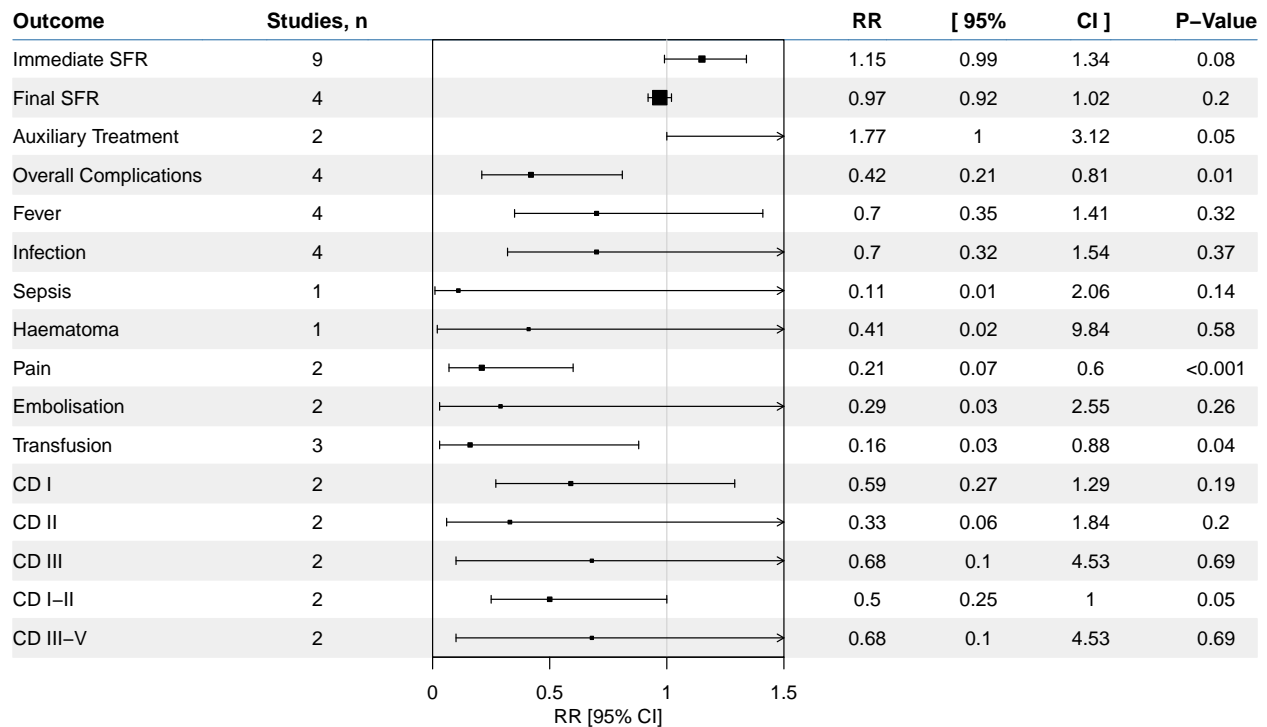

Supplement: BCO2-5-895-s004.pdf [file BCO2-5-895-s004.pdf]
